# Supplementary material for: Dissection of full-length transcriptome and metabolome of Dichocarpum (Ranunculaceae): implications in evolution of specialized metabolism of Ranunculales medicinal plants
Source: PeerJ journal article supplement (doi:10.7717/peerj.12428), 2021-11-05
Supplement: Table_S1,2revis03.xlsx [file Table_S1%2C2revis03.xlsx]

## Sheet: Table S1
Table S1 Summary of medicinal species and other species of the genus Dichocarpum
Species	Synonym / Common name	Distribution	Habitat/Ecology	Medicinal part	Traditional efficacy	Chromosome no.(2n)	Note
D. trifoliolatum W. T. Wang et Hsiao	goats do not eat, tripod cicada (Junlian,Sichuan), cow urine grass	southern Sichuan(Junlian)	Altitude 800 m,on the rocks in the shade of a mountain ditch	whole plant	expel wind,sharpen the wits,quiet the spirit	ND	Endemic medicinal plant in Sichuan
D. basilare W. T. Wang et Hsiao	Diwujia(Sichuan)	south Sichuan(Junlian,Yibin)	Altitude 550 m,mountain grass	whole plant	for rheumatism, edema	ND	Endemic medicinal plant in Sichuan
D. dalzielii(Drumm. et Hutch.) W. T. Wang et Hsiao	Yanjielian (Guizhou), longjieqi, wild goldthread (Conghua, Guangdong), aboriginal goldthread(Zhejiang), shuangguo grass	Zhejiang,Jiangxi,western Fujian,Guangdong,Guangxi,Sichuan(Nanchuan),Guizhou(Suiyang, Xingren, Fanjing Mountain),Chongqing(Jinfo Mountain),Hangzhou Botanical Garden	Altitude 750-1600 m,under the dense forest in mountain area, beside stream and ditch, etc.	rhizome(Yanjielian,Tujia Nationality)/whole plant	clear heat and resolve toxin, disperse swelling and relieve pain;for painful swelling from knocks and falls, innominate toxin swelling; external use for red, swollen,sore-toxin,taxation damage, low back pain,trauma	24
D. auriculatum(Franch.) W. T. Wang	Sowgrass,mountain goldthread(Sichuan)	Hubei,Sichuan(Mount Emei),Guizhou,northeast Yunnan,Fujian	Altitude 650-1600 m,wet land in the shade of mountains,next to the rocks under the sparse forest	whole plant,rhizome	suppress cough and transform phlegm, anti inflammatory; for phlegm panting and cough, vacuity swelling; external application for scrofula; for poultry disease, epilepsy	24
D. sutchuenense(Franch.) W. T. Wang et Hsiao		Zhejiang,Hubei,Sichuan(Mount Emei),Yunnan	Altitude 1450-2150 m,wet spot under a mountain forest or beside a rock by a stream	rhizome	clear heat and resolve toxin, disperse swelling	24
D. franchetii(Finet et Gagn.) W. T. Wang et Hsiao		Hunan,north Guangxi,Taiwan,Guizhou(Kaili,Fanjing Mountain),Sichuan,Yunnan,Anhui	Altitude 1300-3200 m, dense forest or sparse forest of mountain area, or wet place at the bottom of ditch	root/whole plant	fortify the spleen and boost the stomach,clear heat and resolve toxin; for dyspepsia, sore red swollen eyes	ND
D. fargesii (Franch.) W. T. Wang et Hsiao	Jiamoli, wild cucumber (Guizhou)	south Shaanxi,southeast Gansu,southwest Henan,west Hubei,east Sichuan,north Guizhou(Jinsha,Fanjing Mountain,Leigong Mountain),Anhui,Chongqing(Jinfo Mountain),Hunan	Altitude 1300-1600 m, wet and shady valley	whole plant	fortify the spleen and boost the stomach,clear heat and brighten eyes; for dyspepsia, wind-fire red eye(same as D. franchetii)	24
D.arisanense (Hayata) W. T. Wang et Hsiao		Taiwan	On the mountain, under the forest	NA	NA	ND
D.hypoglaucum W. T. Wang et Hsiao(D. lobatipetalum,D. malipoense)		southeast Yunnan (Xichou)	It grows in woods at elevations of 1300 to 1700 m, preferring a limestone habitat; in woods in ravine;in the mountain forest, on the limestone of the wet place ,alt.1537 m(D. lobatipetalum);1300 m, streamside in woods(D. malipoense)	NA	NA	24
ND,not determined

## Sheet: Table S2
Table S2 Summary of full length transcripts and polished consensus sequences
Sample	No.of CCS after clustering	Mean pass no.of CCS	No.of non-full length non-chimeric reads(NFL)	No.of full length reads(FL)	No.of full length non-chimeric reads(FLNC)	No.of full length chimeric reads(FLC)	Mean read length of FLNC	FLNC/CCS(%)	No.of polished consensus reads	Minimal length of polished consensus read(bp)	Maximal length of polished consensus read(bp)	Mean length of polished consensus read(bp)	N50
SCJY	290308	9	55497	234811	232655	2156	1634	80.14	25323	52	8407	1677	2207
SCEZ	355047	8	66112	288935	287137	1798	1691	80.87	27794	58	13093	1789	2120
HBZL	329464	8	57646	271818	269125	2693	1731	81.69	30103	54	10129	1727	2129
YNLB	303157	8	53511	249646	247349	2297	1880	81.59	26372	52	12123	1874	2397
YNMLP	352690	8	69362	283328	280981	2347	1907	79.67	29420	57	11405	1915	2512
Note: The length of polished consensus read is ranked from long to short, and the length of polished consensus read is accumulated successively until it is not less than 50% of the total length, at which the length of polished consensus read is called N50.
In PacBio sequencing, the sequence information are captured during the replication process of target DNA. The template (SMRTbell) is a closed, single-stranded circular DNA that is created by ligating hairpin adaptors to both ends of the target double-stranded DNA (dsDNA) (https://www.pacb.com/search/?q=SMRTbell). When a sample of SMRTbell is loaded to a chip called a SMRT cell, a SMRTbell diffuse…
