# Supplementary material for: Dissection of full-length transcriptome and metabolome of Dichocarpum (Ranunculaceae): implications in evolution of specialized metabolism of Ranunculales medicinal plants
Source: PeerJ journal article supplement (doi:10.7717/peerj.12428), 2021-11-05
Supplement: Table_S3,GO_annotation,revis03.xlsx [file Table_S3%2CGO_annotation%2Crevis03.xlsx]

## Sheet: HBZL.GO.anno
Table S3 GO annotations of five Dichocarpum species
Gene_id	GO_number	GO_id; GO_description; GO_class
transcript_HQ_HBZL_transcript10003/f2p0/2037	4	GO:0020037; heme binding; molecular_function	GO:0005506; iron ion binding; molecular_function	GO:0055114; oxidation-reduction process; biological_process	GO:0016705; oxidoreductase activity, acting on paired donors, with incorporation or reduction of molecular oxygen; molecular_function
transcript_HQ_HBZL_transcript10004/f2p0/2042	5	GO:0016788; hydrolase activity, acting on ester bonds; molecular_function	GO:0016787; hydrolase activity; molecular_function	GO:0006629; lipid metabolic process; biological_process	GO:0008374; O-acyltransferase activity; molecular_function	GO:0009058; biosynthetic process; biological_process
transcript_HQ_HBZL_transcript10007/f2p0/2041	1	GO:0003676; nucleic acid binding; molecular_function
transcript_HQ_HBZL_transcript10008/f4p0/2038	3	GO:0043565; sequence-specific DNA binding; molecular_function	GO:0006355; regulation of transcription, DNA-dependent; biological_process	GO:0003700; sequence-specific DNA binding transcription factor activity; molecular_function
transcript_HQ_HBZL_transcript10012/f4p0/2039	8	GO:0009890; negative regulation of biosynthetic process; biological_process	GO:0046873; metal ion transmembrane transporter activity; molecular_function	GO:0003676; nucleic acid binding; molecular_function	GO:0055085; transmembrane transport; biological_process	GO:0016020; membrane; cellular_component	GO:0030001; metal ion transport; biological_process	GO:0005524; ATP binding; molecular_function	GO:0005634; nucleus; cellular_component
transcript_HQ_HBZL_transcript10013/f2p0/2036	2	GO:0008373; sialyltransferase activity; molecular_function	GO:0006486; protein glycosylation; biological_process
transcript_HQ_HBZL_transcript10014/f2p0/2042	1	GO:0003676; nucleic acid binding; molecular_function
transcript_HQ_HBZL_transcript10015/f3p0/2043	3	GO:0008810; cellulase activity; molecular_function	GO:0005975; carbohydrate metabolic process; biological_process	GO:0005543; phospholipid binding; molecular_function
transcript_HQ_HBZL_transcript10016/f13p0/2063	8	GO:0055085; transmembrane transport; biological_process	GO:0006812; cation transport; biological_process	GO:0016021; integral to membrane; cellular_component	GO:0015299; solute:hydrogen antiporter activity; molecular_function	GO:0016747; transferase activity, transferring acyl groups other than amino-acyl groups; molecular_function	GO:0004315; 3-oxoacyl-[acyl-carrier-protein] synthase activity; molecular_function	GO:0016020; membrane; cellular_component	GO:0006633; fatty acid biosynthetic process; biological_process
transcript_HQ_HBZL_transcript10022/f2p0/2040	4	GO:0008408; 3'-5' exonuclease activity; molecular_function	GO:0005515; protein binding; molecular_function	GO:0008289; lipid binding; molecular_function	GO:0006260; DNA replication; biological_process
transcript_HQ_HBZL_transcript10023/f4p0/2035	8	GO:0004764; shikimate 5-dehydrogenase activity; molecular_function	GO:0016491; oxidoreductase activity; molecular_function	GO:0003855; 3-dehydroquinate dehydratase activity; molecular_function	GO:0055114; oxidation-reduction process; biological_process	GO:0004616; phosphogluconate dehydrogenase (decarboxylating) activity; molecular_function	GO:0008033; tRNA processing; biological_process	GO:0051287; NAD binding; molecular_function	GO:0050660; flavin adenine dinucleotide binding; molecular_function
transcript_HQ_HBZL_transcript10026/f2p0/2036	1	GO:0016020; membrane; cellular_component
transcript_HQ_HBZL_transcript1003/f3p0/3754	1	GO:0006450; regulation of translational fidelity; biological_process
transcript_HQ_HBZL_transcript10031/f4p0/2055	6	GO:0004672; protein kinase activity; molecular_function	GO:0006468; protein phosphorylation; biological_process	GO:0004674; protein serine/threonine kinase activity; molecular_function	GO:0016773; phosphotransferase activity, alcohol group as acceptor; molecular_function	GO:0005524; ATP binding; molecular_function	GO:0016020; membrane; cellular_component
transcript_HQ_HBZL_transcript10033/f2p0/2037	7	GO:0005515; protein binding; molecular_function	GO:0005524; ATP binding; molecular_function	GO:0007165; signal transduction; biological_process	GO:0005509; calcium ion binding; molecular_function	GO:0006468; protein phosphorylation; biological_process	GO:0004672; protein kinase activity; molecular_function	GO:0005578; proteinaceous extracellular matrix; cellular_component
transcript_HQ_HBZL_transcript10035/f3p0/2035	2	GO:0004553; hydrolase activity, hydrolyzing O-glycosyl compounds; molecular_function	GO:0005975; carbohydrate metabolic process; biological_process
transcript_HQ_HBZL_transcript10038/f4p0/2051	3	GO:0055114; oxidation-reduction process; biological_process	GO:0016491; oxidoreductase activity; molecular_function	GO:0045454; cell redox homeostasis; biological_process
transcript_HQ_HBZL_transcript10039/f2p0/2072	2	GO:0016779; nucleotidyltransferase activity; molecular_function	GO:0009058; biosynthetic process; biological_process
transcript_HQ_HBZL_transcript10040/f3p0/2045	2	GO:0016616; oxidoreductase activity, acting on the CH-OH group of donors, NAD or NADP as acceptor; molecular_function	GO:0055114; oxidation-reduction process; biological_process
transcript_HQ_HBZL_transcript10041/f3p0/2048	2	GO:0051082; unfolded protein binding; molecular_function	GO:0031072; heat shock protein binding; molecular_function
transcript_HQ_HBZL_transcript10047/f3p0/2056	4	GO:0004222; metalloendopeptidase activity; molecular_function	GO:0005524; ATP binding; molecular_function	GO:0006468; protein phosphorylation; biological_process	GO:0004672; protein kinase activity; molecular_function
transcript_HQ_HBZL_transcript10048/f13p0/2065	1	GO:0051260; protein homooligomerization; biological_process
transcript_HQ_HBZL_transcript1005/f4p0/3768	4	GO:0009725; response to hormone stimulus; biological_process	GO:0005634; nucleus; cellular_component	GO:0003677; DNA binding; molecular_function	GO:0006355; regulation of transcription, DNA-dependent; biological_process
transcript_HQ_HBZL_transcript10050/f2p0/2043	1	GO:0003677; DNA binding; molecular_function
transcript_HQ_HBZL_transcript10051/f4p0/2069	2	GO:0008289; lipid binding; molecular_function	GO:0005515; protein binding; molecular_function
transcript_HQ_HBZL_transcript10053/f3p0/2027	6	GO:0006952; defense response; biological_process	GO:0007224; smoothened signaling pathway; biological_process	GO:0016020; membrane; cellular_component	GO:0006817; phosphate transport; biological_process	GO:0016021; integral to membrane; cellular_component	GO:0005315; inorganic phosphate transmembrane transporter activity; molecular_function
transcript_HQ_HBZL_transcript10056/f4p0/2018	4	GO:0016021; integral to membrane; cellular_component	GO:0006812; cation transport; biological_process	GO:0015299; solute:hydrogen antiporter activity; molecular_function	GO:0055085; transmembrane transport; biological_process
transcript_HQ_HBZL_transcript10058/f3p0/2033	1	GO:0046872; metal ion binding; molecular_function
transcript_HQ_HBZL_transcript1006/f2p0/3746	7	GO:0005515; protein binding; molecular_function	GO:0003735; structural constituent of ribosome; molecular_function	GO:0006412; translation; biological_process	GO:0008270; zinc ion binding; molecular_function	GO:0005622; intracellular; cellular_component	GO:0005506; iron ion binding; molecular_function	GO:0005840; ribosome; cellular_component
transcript_HQ_HBZL_transcript10061/f4p0/2034	3	GO:0004672; protein kinase activity; molecular_function	GO:0006468; protein phosphorylation; biological_process	GO:0005524; ATP binding; molecular_function
transcript_HQ_HBZL_transcript10062/f9p0/2008	1	GO:0005524; ATP binding; molecular_function
transcript_HQ_HBZL_transcript10065/f3p0/1498	2	GO:0006096; glycolysis; biological_process	GO:0003872; 6-phosphofructokinase activity; molecular_function
transcript_HQ_HBZL_transcript10068/f3p0/2026	1	GO:0016773; phosphotransferase activity, alcohol group as acceptor; molecular_function
transcript_HQ_HBZL_transcript10069/f2p0/2047	2	GO:0016853; isomerase activity; molecular_function	GO:0005975; carbohydrate metabolic process; biological_process
transcript_HQ_HBZL_transcript10070/f2p0/2062	2	GO:0016021; integral to membrane; cellular_component	GO:0016020; membrane; cellular_component
transcript_HQ_HBZL_transcript10072/f3p0/2028	14	GO:0005524; ATP binding; molecular_function	GO:0003678; DNA helicase activity; molecular_function	GO:0098519; NA	GO:0006000; fructose metabolic process; biological_process	GO:0006614; SRP-dependent cotranslational protein targeting to membrane; biological_process	GO:0006281; DNA repair; biological_process	GO:0016787; hydrolase activity; molecular_function	GO:0048500; signal recognition particle; cellular_component	GO:0008312; 7S RNA binding; molecular_function	GO:0003873; 6-phosphofructo-2-kinase activity; molecular_function	GO:0000723; telomere maintenance; biological_process	GO:0005525; GTP binding; molecular_function	GO:0016301; kinase activity; molecular_function	GO:0003677; DNA binding; molecular_function
transcript_HQ_HBZL_transcript10077/f6p0/2036	1	GO:0016787; hydrolase activity; molecular_function
transcript_HQ_HBZL_transcript10078/f3p0/2049	9	GO:0005515; protein binding; molecular_function	GO:0005509; calcium ion binding; molecular_function	GO:0006468; protein phosphorylation; biological_process	GO:0005524; ATP binding; molecular_function	GO:0016020; membrane; cellular_component	GO:0004672; protein kinase activity; molecular_function	GO:0005578; proteinaceous extracellular matrix; cellular_component	GO:0007165; signal transduction; biological_process	GO:0016773; phosphotransferase activity, alcohol group as acceptor; molecular_function
transcript_HQ_HBZL_transcript1008/f6p0/3680	1	GO:0046872; metal ion binding; molecular_function
transcript_HQ_HBZL_transcript10080/f4p0/2032	3	GO:0005524; ATP binding; molecular_function	GO:0004672; protein kinase activity; molecular_function	GO:0006468; protein phosphorylation; biological_process
transcript_HQ_HBZL_transcript10083/f2p0/2031	5	GO:0055085; transmembrane transport; biological_process	GO:0005215; NA	GO:0006810; transport; biological_process	GO:0016020; membrane; cellular_component	GO:0016021; integral to membrane; cellular_component
transcript_HQ_HBZL_transcript10084/f2p0/2026	3	GO:0016020; membrane; cellular_component	GO:0005215; NA	GO:0006810; transport; biological_process
transcript_HQ_HBZL_transcript10087/f2p0/1914	5	GO:0000287; magnesium ion binding; molecular_function	GO:0006096; glycolysis; biological_process	GO:0003824; NA	GO:0030955; potassium ion binding; molecular_function	GO:0004743; pyruvate kinase activity; molecular_function
transcript_HQ_HBZL_transcript10089/f2p0/2033	3	GO:0005215; NA	GO:0006810; transport; biological_process	GO:0016020; membrane; cellular_component
transcript_HQ_HBZL_transcript10092/f10p0/2041	6	GO:0005215; NA	GO:0022857; transmembrane transporter activity; molecular_function	GO:0055085; transmembrane transport; biological_process	GO:0006810; transport; biological_process	GO:0016021; integral to membrane; cellular_component	GO:0016020; membrane; cellular_component
transcript_HQ_HBZL_transcript10097/f4p0/2091	3	GO:0005515; protein binding; molecular_function	GO:0003743; translation initiation factor activity; molecular_function	GO:0006413; translational initiation; biological_process
transcript_HQ_HBZL_transcript101/f2p0/5894	1	GO:0005515; protein binding; molecular_function
transcript_HQ_HBZL_transcript10102/f2p0/2038	3	GO:0015078; hydrogen ion transmembrane transporter activity; molecular_function	GO:0033177; proton-transporting two-sector ATPase complex, proton-transporting domain; cellular_component	GO:0015991; ATP hydrolysis coupled proton transport; biological_process
transcript_HQ_HBZL_transcript10104/f2p0/2043	3	GO:0055114; oxidation-reduction process; biological_process	GO:0005507; copper ion binding; molecular_function	GO:0016491; oxidoreductase activity; molecular_function
transcript_HQ_HBZL_transcript10105/f2p0/2029	2	GO:0004144; diacylglycerol O-acyltransferase activity; molecular_function	GO:0045017; glycerolipid biosynthetic process; biological_process
transcript_HQ_HBZL_transcript10115/f2p0/2070	2	GO:0005544; calcium-dependent phospholipid binding; molecular_function	GO:0005509; calcium ion binding; molecular_function
transcript_HQ_HBZL_transcript10119/f4p0/2042	8	GO:0005739; mitochondrion; cellular_component	GO:0016020; membrane; cellular_component	GO:0022900; electron transport chain; biological_process	GO:0005747; mitochondrial respiratory chain complex I; cellular_component	GO:0005215; NA	GO:0006814; sodium ion transport; biological_process	GO:0055085; transmembrane transport; biological_process	GO:0016021; integral to membrane; cellular_component
transcript_HQ_HBZL_transcript1012/f8p0/3771	1	GO:0008641; small protein activating enzyme activity; molecular_function
transcript_HQ_HBZL_transcript10121/f3p0/2058	1	GO:0005515; protein binding; molecular_function
transcript_HQ_HBZL_transcript10124/f3p0/2055	1	GO:0005515; protein binding; molecular_function
transcript_HQ_HBZL_transcript10128/f2p0/2041	4	GO:0016831; carboxy-lyase activity; molecular_function	GO:0019752; carboxylic acid metabolic process; biological_process	GO:0030170; pyridoxal phosphate binding; molecular_function	GO:0009058; biosynthetic process; biological_process
transcript_HQ_HBZL_transcript10129/f6p0/2074	2	GO:0005525; GTP binding; molecular_function	GO:0003924; GTPase activity; molecular_function
transcript_HQ_HBZL_transcript1013/f2p0/3770	3	GO:0005524; ATP binding; molecular_function	GO:0004672; protein kinase activity; molecular_function	GO:0006468; protein phosphorylation; biological_process
transcript_HQ_HBZL_transcript10130/f2p0/2035	3	GO:0016021; integral to membrane; cellular_component	GO:0015095; magnesium ion transmembrane transporter activity; molecular_function	GO:0015693; magnesium ion transport; biological_process
transcript_HQ_HBZL_transcript10131/f3p0/1986	4	GO:0016491; oxidoreductase activity; molecular_function	GO:0004097; catechol oxidase activity; molecular_function	GO:0055114; oxidation-reduction process; biological_process	GO:0008152; NA
transcript_HQ_HBZL_transcript10132/f2p0/2015	3	GO:0010333; terpene synthase activity; molecular_function	GO:0016829; lyase activity; molecular_function	GO:0000287; magnesium ion binding; molecular_function
transcript_HQ_HBZL_transcript10137/f2p0/2046	3	GO:0006468; protein phosphorylation; biological_process	GO:0004672; protein kinase activity; molecular_function	GO:0005524; ATP binding; molecular_function
transcript_HQ_HBZL_transcript10139/f2p0/2056	3	GO:0016491; oxidoreductase activity; molecular_function	GO:0008198; ferrous iron binding; molecular_function	GO:0006725; cellular aromatic compound metabolic process; biological_process
transcript_HQ_HBZL_transcript10141/f2p0/2049	2	GO:0016757; transferase activity, transferring glycosyl groups; molecular_function	GO:0016020; membrane; cellular_component
transcript_HQ_HBZL_transcript10146/f4p0/2029	6	GO:0008152; NA	GO:0055114; oxidation-reduction process; biological_process	GO:0004616; phosphogluconate dehydrogenase (decarboxylating) activity; molecular_function	GO:0016597; amino acid binding; molecular_function	GO:0016616; oxidoreductase activity, acting on the CH-OH group of donors, NAD or NADP as acceptor; molecular_function	GO:0051287; NAD binding; molecular_function
transcript_HQ_HBZL_transcript1015/f15p0/3752	2	GO:0005515; protein binding; molecular_function	GO:0003676; nucleic acid binding; molecular_function
transcript_HQ_HBZL_transcript10150/f6p0/2034	3	GO:0004455; ketol-acid reductoisomerase activity; molecular_function	GO:0055114; oxidation-reduction process; biological_process	GO:0009082; branched chain family amino acid biosynthetic process; biological_process
transcript_HQ_HBZL_transcript10151/f5p0/2020	2	GO:0006952; defense response; biological_process	GO:0016021; integral to membrane; cellular_component
transcript_HQ_HBZL_transcript10152/f2p0/2020	5	GO:0008053; mitochondrial fusion; biological_process	GO:0005741; mitochondrial outer membrane; cellular_component	GO:0003924; GTPase activity; molecular_function	GO:0016021; integral to membrane; cellular_component	GO:0005515; protein binding; molecular_function
transcript_HQ_HBZL_transcript10153/f4p0/2043	8	GO:0043565; sequence-specific DNA binding; molecular_function	GO:0070840; dynein complex binding; molecular_function	GO:0006914; autophagy; biological_process	GO:0006355; regulation of transcription, DNA-dependent; biological_process	GO:0005634; nucleus; cellular_component	GO:0042803; protein homodimerization activity; molecular_function	GO:0008134; transcription factor binding; molecular_function	GO:0003700; sequence-specific DNA binding transcription factor activity; molecular_function
transcript_HQ_HBZL_transcript10155/f4p0/2029	3	GO:0004672; protein kinase activity; molecular_function	GO:0006468; protein phosphorylation; biological_process	GO:0005524; ATP binding; molecular_function
transcript_HQ_HBZL_transcript10156/f2p0/2035	1	GO:0005515; protein binding; molecular_function
transcript_HQ_HBZL_transcript1016/f2p0/3754	4	GO:0005515; protein binding; molecular_function	GO:0043248; proteasome assembly; biological_process	GO:0008536; Ran GTPase binding; molecular_function	GO:0006886; intracellular protein transport; biological_process
transcript_HQ_HBZL_transcript10162/f2p0/2037	1	GO:0008270; zinc ion binding; molecular_function
transcript_HQ_HBZL_transcript10165/f8p0/2023	1	GO:0005515; protein binding; molecular_function
transcript_HQ_HBZL_transcript10166/f13p0/1980	6	GO:0015238; drug transmembrane transporter activity; molecular_function	GO:0055085; transmembrane transport; biological_process	GO:0005887; integral to plasma membrane; cellular_component	GO:0016020; membrane; cellular_component	GO:0006855; drug transmembrane transport; biological_process	GO:0015297; antiporter activity; molecular_function
transcript_HQ_HBZL_transcript10167/f2p0/2002	1	GO:0005515; protein binding; molecular_function
transcript_HQ_HBZL_transcript10168/f5p0/2051	4	GO:0005524; ATP binding; molecular_function	GO:0004672; protein kinase activity; molecular_function	GO:0030247; polysaccharide binding; molecular_function	GO:0006468; protein phosphorylation; biological_process
transcript_HQ_HBZL_transcript10169/f2p0/2043	4	GO:0055114; oxidation-reduction process; biological_process	GO:0051536; iron-sulfur cluster binding; molecular_function	GO:0016491; oxidoreductase activity; molecular_function	GO:0020037; heme binding; molecular_function
transcript_HQ_HBZL_transcript10170/f2p0/2025	2	GO:0005515; protein binding; molecular_function	GO:0006351; transcription, DNA-dependent; biological_process
transcript_HQ_HBZL_transcript10171/f2p0/2045	1	GO:0005515; protein binding; molecular_function
transcript_HQ_HBZL_transcript10172/f7p0/2072	7	GO:0016021; integral to membrane; cellular_component	GO:0016020; membrane; cellular_component	GO:0003333; amino acid transmembrane transport; biological_process	GO:0006810; transport; biological_process	GO:0009847; spore germination; biological_process	GO:0015171; amino acid transmembrane transporter activity; molecular_function	GO:0055085; transmembrane transport; biological_process
transcript_HQ_HBZL_transcript10173/f3p0/2026	1	GO:0005515; protein binding; molecular_function
transcript_HQ_HBZL_transcript10174/f5p0/2026	3	GO:0055085; transmembrane transport; biological_process	GO:0022857; transmembrane transporter activity; molecular_function	GO:0016021; integral to membrane; cellular_component
transcript_HQ_HBZL_transcript10175/f6p0/1962	3	GO:0071949; FAD binding; molecular_function	GO:0055114; oxidation-reduction process; biological_process	GO:0016491; oxidoreductase activity; molecular_function
transcript_HQ_HBZL_transcript10178/f4p0/2008	6	GO:0008013; beta-catenin binding; molecular_function	GO:0045046; protein import into peroxisome membrane; biological_process	GO:0005779; integral to peroxisomal membrane; cellular_component	GO:0032403; protein complex binding; molecular_function	GO:0016592; mediator complex; cellular_component	GO:0046872; metal ion binding; molecular_function
transcript_HQ_HBZL_transcript1018/f4p0/3743	2	GO:0003677; DNA binding; molecular_function	GO:0006355; regulation of transcription, DNA-dependent; biological_process
transcript_HQ_HBZL_transcript10182/f2p0/2028	3	GO:0006468; protein phosphorylation; biological_process	GO:0004672; protein kinase activity; molecular_function	GO:0005524; ATP binding; molecular_function
transcript_HQ_HBZL_transcript10185/f2p0/2018	4	GO:0004097; catechol oxidase activity; molecular_function	GO:0016491; oxidoreductase activity; molecular_function	GO:0008152; NA	GO:0055114; oxidation-reduction process; biological_process
transcript_HQ_HBZL_transcript10187/f2p0/2039	4	GO:0009058; biosynthetic process; biological_process	GO:0006629; lipid metabolic process; biological_process	GO:0016787; hydrolase activity; molecular_function	GO:0016788; hydrolase activity, acting on ester bonds; molecular_function
transcript_HQ_HBZL_transcript10189/f2p0/2022	1	GO:0005634; nucleus; cellular_component
transcript_HQ_HBZL_transcript1019/f2p0/3753	1	GO:0042578; phosphoric ester hydrolase activity; molecular_function
transcript_HQ_HBZL_transcript10192/f2p0/1998	5	GO:0003333; amino acid transmembrane transport; biological_process	GO:0016020; membrane; cellular_component	GO:0055085; transmembrane transport; biological_process	GO:0006810; transport; biological_process	GO:0015171; amino acid transmembrane transporter activity; molecular_function
transcript_HQ_HBZL_transcript10193/f2p0/2041	3	GO:0003899; DNA-directed RNA polymerase activity; molecular_function	GO:0006351; transcription, DNA-dependent; biological_process	GO:0003677; DNA binding; molecular_function
transcript_HQ_HBZL_transcript10195/f5p0/2028	3	GO:0036459; NA	GO:0016579; protein deubiquitination; biological_process	GO:0008270; zinc ion binding; molecular_function
transcript_HQ_HBZL_transcript10197/f3p0/2022	1	GO:0008855; exodeoxyribonuclease VII activity; molecular_function
transcript_HQ_HBZL_transcript10198/f2p0/2039	4	GO:0010333; terpene synthase activity; molecular_function	GO:0008152; NA	GO:0000287; magnesium ion binding; molecular_function	GO:0016829; lyase activity; molecular_function
transcript_HQ_HBZL_transcript102/f4p0/5874	3	GO:0003677; DNA binding; molecular_function	GO:0006355; regulation of transcription, DNA-dependent; biological_process	GO:0006351; transcription, DNA-dependent; biological_process
transcript_HQ_HBZL_transcript10200/f2p0/2028	5	GO:0000287; magnesium ion binding; molecular_function	GO:0006096; glycolysis; biological_process	GO:0004743; pyruvate kinase activity; molecular_function	GO:0030955; potassium ion binding; molecular_function	GO:0003824; NA
transcript_HQ_HBZL_transcript10202/f4p0/2030	1	GO:0019089; transmission of virus; biological_process
transcript_HQ_HBZL_transcript10203/f2p0/2020	2	GO:0004373; glycogen (starch) synthase activity; molecular_function	GO:0005978; glycogen biosynthetic process; biological_process
transcript_HQ_HBZL_transcript10214/f2p0/2062	1	GO:0016763; transferase activity, transferring pentosyl groups; molecular_function
transcript_HQ_HBZL_transcript10217/f5p0/2031	6	GO:0016020; membrane; cellular_component	GO:0005524; ATP binding; molecular_function	GO:0007165; signal transduction; biological_process	GO:0006468; protein phosphorylation; biological_process	GO:0016773; phosphotransferase activity, alcohol group as acceptor; molecular_function	GO:0004672; protein kinase activity; molecular_function
transcript_HQ_HBZL_transcript10218/f2p0/2041	1	GO:0003676; nucleic acid binding; molecular_function
transcript_HQ_HBZL_transcript1022/f6p0/3757	4	GO:0004672; protein kinase activity; molecular_function	GO:0006468; protein phosphorylation; biological_process	GO:0005524; ATP binding; molecular_function	GO:0005515; protein binding; molecular_function
transcript_HQ_HBZL_transcript10221/f2p0/2016	8	GO:0006355; regulation of transcription, DNA-dependent; biological_process	GO:0005634; nucleus; cellular_component	GO:0045893; positive regulation of transcription, DNA-dependent; biological_process	GO:0043565; sequence-specific DNA binding; molecular_function	GO:0003677; DNA binding; molecular_function	GO:0003700; sequence-specific DNA binding transcription factor activity; molecular_function	GO:0042025; host cell nucleus; cellular_component	GO:0006351; transcription, DNA-dependent; biological_process
transcript_HQ_HBZL_transcript10224/f9p0/2080	3	GO:0006413; translational initiation; biological_process	GO:0003743; translation initiation factor activity; molecular_function	GO:0005515; protein binding; molecular_function
transcript_HQ_HBZL_transcript10228/f5p0/2037	11	GO:0007155; cell adhesion; biological_process	GO:0006355; regulation of transcription, DNA-dependent; biological_process	GO:0007165; signal transduction; biological_process	GO:0030269; tetrahydromethanopterin S-methyltransferase activity; molecular_function	GO:0051015; actin filament binding; molecular_function	GO:0006412; translation; biological_process	GO:0005840; ribosome; cellular_component	GO:0003723; RNA binding; molecular_function	GO:0015948; methanogenesis; biological_process	GO:0003735; structural constituent of ribosome; molecular_function	GO:0016021; integral to membrane; cellular_component
transcript_HQ_HBZL_transcript10229/f2p0/2013	3	GO:0004674; protein serine/threonine kinase activity; molecular_function	GO:0031072; heat shock protein binding; molecular_function	GO:0051082; unfolded protein binding; molecular_function
transcript_HQ_HBZL_transcript10231/f18p0/1976	5	GO:0016021; integral to membrane; cellular_component	GO:0016020; membrane; cellular_component	GO:0005215; NA	GO:0006814; sodium ion transport; biological_process	GO:0055085; transmembrane transport; biological_process
transcript_HQ_HBZL_transcript10232/f2p0/2013	2	GO:0008152; NA	GO:0003824; NA
transcript_HQ_HBZL_transcript10233/f28p0/1817	5	GO:0006810; transport; biological_process	GO:0022857; transmembrane transporter activity; molecular_function	GO:0055085; transmembrane transport; biological_process	GO:0016021; integral to membrane; cellular_component	GO:0003725; double-stranded RNA binding; molecular_function
transcript_HQ_HBZL_transcript10235/f2p0/2018	3	GO:0003830; beta-1,4-mannosylglycoprotein 4-beta-N-acetylglucosaminyltransferase activity; molecular_function	GO:0016020; membrane; cellular_component	GO:0006487; protein N-linked glycosylation; biological_process
transcript_HQ_HBZL_transcript10239/f2p0/2023	3	GO:0006468; protein phosphorylation; biological_process	GO:0004672; protein kinase activity; molecular_function	GO:0005524; ATP binding; molecular_function
transcript_HQ_HBZL_transcript10242/f3p0/2028	7	GO:0008270; zinc ion binding; molecular_function	GO:0005515; protein binding; molecular_function	GO:0016567; protein ubiquitination; biological_process	GO:0003723; RNA binding; molecular_function	GO:0004842; ubiquitin-protein ligase activity; molecular_function	GO:0046872; metal ion binding; molecular_function	GO:0005634; nucleus; cellular_component
transcript_HQ_HBZL_transcript10243/f2p0/2038	5	GO:0016705; oxidoreductase activity, acting on paired donors, with incorporation or reduction of molecular oxygen; molecular_function	GO:0055114; oxidation-reduction process; biological_process	GO:0042138; meiotic DNA double-strand break formation; biological_process	GO:0005506; iron ion binding; molecular_function	GO:0020037; heme binding; molecular_function
transcript_HQ_HBZL_transcript10247/f5p0/2014	1	GO:0005515; protein binding; molecular_function
transcript_HQ_HBZL_transcript10248/f3p0/2033	4	GO:0046872; metal ion binding; molecular_function	GO:0005524; ATP binding; molecular_function	GO:0015833; peptide transport; biological_process	GO:0000166; nucleotide binding; molecular_function
transcript_HQ_HBZL_transcript10249/f28p0/1994	7	GO:0004827; proline-tRNA ligase activity; molecular_function	GO:0000166; nucleotide binding; molecular_function	GO:0006433; prolyl-tRNA aminoacylation; biological_process	GO:0005524; ATP binding; molecular_function	GO:0004812; aminoacyl-tRNA ligase activity; molecular_function	GO:0006418; tRNA aminoacylation for protein translation; biological_process	GO:0005737; cytoplasm; cellular_component
transcript_HQ_HBZL_transcript10250/f2p0/2019	2	GO:0016021; integral to membrane; cellular_component	GO:0055085; transmembrane transport; biological_process
transcript_HQ_HBZL_transcript10251/f2p0/2025	2	GO:0006351; transcription, DNA-dependent; biological_process	GO:0046983; protein dimerization activity; molecular_function
transcript_HQ_HBZL_transcript10252/f2p0/2023	5	GO:0006397; mRNA processing; biological_process	GO:0003723; RNA binding; molecular_function	GO:0005634; nucleus; cellular_component	GO:0046660; female sex differentiation; biological_process	GO:0003676; nucleic acid binding; molecular_function
transcript_HQ_HBZL_transcript10254/f6p0/2031	3	GO:0004672; protein kinase activity; molecular_function	GO:0006468; protein phosphorylation; biological_process	GO:0005524; ATP binding; molecular_function
transcript_HQ_HBZL_transcript10256/f17p0/2020	3	GO:0003676; nucleic acid binding; molecular_function	GO:0005886; plasma membrane; cellular_component	GO:0016021; integral to membrane; cellular_component
transcript_HQ_HBZL_transcript10259/f5p0/2012	2	GO:0016021; integral to membrane; cellular_component	GO:0055085; transmembrane transport; biological_process
transcript_HQ_HBZL_transcript1026/f2p0/3745	2	GO:0005515; protein binding; molecular_function	GO:0003824; NA
transcript_HQ_HBZL_transcript10260/f7p0/2014	4	GO:0055114; oxidation-reduction process; biological_process	GO:0016705; oxidoreductase activity, acting on paired donors, with incorporation or reduction of molecular oxygen; molecular_function	GO:0020037; heme binding; molecular_function	GO:0005506; iron ion binding; molecular_function
transcript_HQ_HBZL_transcript10266/f5p0/2029	8	GO:0008033; tRNA processing; biological_process	GO:0008033; tRNA processing; biological_process	GO:0004161; dimethylallyltranstransferase activity; molecular_function	GO:0003924; GTPase activity; molecular_function	GO:0016301; kinase activity; molecular_function	GO:0005525; GTP binding; molecular_function	GO:0005524; ATP binding; molecular_function	GO:0009058; biosynthetic process; biological_process
transcript_HQ_HBZL_transcript10269/f5p0/2024	1	GO:0007165; signal transduction; biological_process
transcript_HQ_HBZL_transcript10270/f6p0/2015	14	GO:0005102; receptor binding; molecular_function	GO:0090529; NA	GO:0043093; cytokinesis by binary fission; biological_process	GO:0051258; protein polymerization; biological_process	GO:0042157; lipoprotein metabolic process; biological_process	GO:0005577; fibrinogen complex; cellular_component	GO:0008289; lipid binding; molecular_function	GO:0051259; protein oligomerization; biological_process	GO:0030168; platelet activation; biological_process	GO:0007165; signal transduction; biological_process	GO:0030674; protein binding, bridging; molecular_function	GO:0006869; lipid transport; biological_process	GO:0005737; cytoplasm; cellular_component	GO:0005576; NA
transcript_HQ_HBZL_transcript10273/f2p0/2016	3	GO:0046556; alpha-N-arabinofuranosidase activity; molecular_function	GO:0016798; hydrolase activity, acting on glycosyl bonds; molecular_function	GO:0046373; L-arabinose metabolic process; biological_process
transcript_HQ_HBZL_transcript10275/f2p0/2049	2	GO:0016747; transferase activity, transferring acyl groups other than amino-acyl groups; molecular_function	GO:0008080; N-acetyltransferase activity; molecular_function
transcript_HQ_HBZL_transcript10278/f4p0/2019	1	GO:0046983; protein dimerization activity; molecular_function
transcript_HQ_HBZL_transcript10279/f4p0/2017	1	GO:0005524; ATP binding; molecular_function
transcript_HQ_HBZL_transcript1028/f2p0/3763	3	GO:0008855; exodeoxyribonuclease VII activity; molecular_function	GO:0007049; cell cycle; biological_process	GO:0071203; WASH complex; cellular_component
transcript_HQ_HBZL_transcript10280/f3p0/2074	16	GO:0003677; DNA binding; molecular_function	GO:0019079; viral genome replication; biological_process	GO:0009378; four-way junction helicase activity; molecular_function	GO:0006281; DNA repair; biological_process	GO:0016787; hydrolase activity; molecular_function	GO:0007264; small GTPase mediated signal transduction; biological_process	GO:0005525; GTP binding; molecular_function	GO:0006310; DNA recombination; biological_process	GO:0003723; RNA binding; molecular_function	GO:0008134; transcription factor binding; molecular_function	GO:0043531; ADP binding; molecular_function	GO:0005524; ATP binding; molecular_function	GO:0003678; DNA helicase activity; molecular_function	GO:0016887; ATPase activity; molecular_function	GO:0003724; RNA helicase activity; molecular_function	GO:0006355; regulation of transcription, DNA-dependent; biological_process
transcript_HQ_HBZL_transcript10281/f2p0/2019	1	GO:0016787; hydrolase activity; molecular_function
transcript_HQ_HBZL_transcript10282/f2p0/2026	3	GO:0016020; membrane; cellular_component	GO:0006810; transport; biological_process	GO:0005215; NA
transcript_HQ_HBZL_transcript10285/f30p0/1932	1	GO:0005096; GTPase activator activity; molecular_function
transcript_HQ_HBZL_transcript1029/f2p0/3796	4	GO:0006000; fructose metabolic process; biological_process	GO:0005524; ATP binding; molecular_function	GO:2001070; NA	GO:0003873; 6-phosphofructo-2-kinase activity; molecular_function
transcript_HQ_HBZL_transcript10294/f3p0/2019	3	GO:0016021; integral to membrane; cellular_component	GO:0019236; response to pheromone; biological_process	GO:0007186; G-protein coupled receptor protein signaling pathway; biological_process
transcript_HQ_HBZL_transcript10295/f2p0/2020	3	GO:0005506; iron ion binding; molecular_function	GO:0051536; iron-sulfur cluster binding; molecular_function	GO:0016226; iron-sulfur cluster assembly; biological_process
transcript_HQ_HBZL_transcript10296/f3p0/2011	5	GO:0030127; COPII vesicle coat; cellular_component	GO:0006888; ER to Golgi vesicle-mediated transport; biological_process	GO:0046872; metal ion binding; molecular_function	GO:0006886; intracellular protein transport; biological_process	GO:0008270; zinc ion binding; molecular_function
transcript_HQ_HBZL_transcript10297/f3p0/2016	4	GO:0009401; phosphoenolpyruvate-dependent sugar phosphotransferase system; biological_process	GO:0016021; integral to membrane; cellular_component	GO:0006621; protein retention in ER lumen; biological_process	GO:0046923; ER retention sequence binding; molecular_function
transcript_HQ_HBZL_transcript10299/f4p0/2034	4	GO:0016746; transferase activity, transferring acyl groups; molecular_function	GO:0008152; NA	GO:0005515; protein binding; molecular_function	GO:0005509; calcium ion binding; molecular_function
transcript_HQ_HBZL_transcript103/f2p0/5886	4	GO:0003723; RNA binding; molecular_function	GO:0003676; nucleic acid binding; molecular_function	GO:0005515; protein binding; molecular_function	GO:0008270; zinc ion binding; molecular_function
transcript_HQ_HBZL_transcript10300/f8p0/2033	3	GO:0005524; ATP binding; molecular_function	GO:0006468; protein phosphorylation; biological_process	GO:0004672; protein kinase activity; molecular_function
transcript_HQ_HBZL_transcript10302/f2p0/2028	3	GO:0051537; 2 iron, 2 sulfur cluster binding; molecular_function	GO:0016491; oxidoreductase activity; molecular_function	GO:0055114; oxidation-reduction process; biological_process
transcript_HQ_HBZL_transcript10305/f2p0/2018	2	GO:0006355; regulation of transcription, DNA-dependent; biological_process	GO:0005622; intracellular; cellular_component
transcript_HQ_HBZL_transcript10306/f4p0/2018	3	GO:0016702; oxidoreductase activity, acting on single donors with incorporation of molecular oxygen, incorporation of two atoms of oxygen; molecular_function	GO:0046872; metal ion binding; molecular_function	GO:0055114; oxidation-reduction process; biological_process
transcript_HQ_HBZL_transcript10309/f6p0/2027	1	GO:0005515; protein binding; molecular_function
transcript_HQ_HBZL_transcript1031/f20p0/3748	4	GO:0005515; protein binding; molecular_function	GO:0005524; ATP binding; molecular_function	GO:0006468; protein phosphorylation; biological_process	GO:0004672; protein kinase activity; molecular_function
transcript_HQ_HBZL_transcript10311/f2p0/2031	12	GO:0004812; aminoacyl-tRNA ligase activity; molecular_function	GO:0006418; tRNA aminoacylation for protein translation; biological_process	GO:0005524; ATP binding; molecular_function	GO:0000166; nucleotide binding; molecular_function	GO:0003676; nucleic acid binding; molecular_function	GO:0005524; ATP binding; molecular_function	GO:0005737; cytoplasm; cellular_component	GO:0006418; tRNA aminoacylation for protein translation; biological_process	GO:0004812; aminoacyl-tRNA ligase activity; molecular_function	GO:0043039; tRNA aminoacylation; biological_process	GO:0000049; tRNA binding; molecular_function	GO:0000166; nucleotide binding; molecular_function
transcript_HQ_HBZL_transcript10313/f2p0/2012	2	GO:0003690; double-stranded DNA binding; molecular_function	GO:0006355; regulation of transcription, DNA-dependent; biological_process
transcript_HQ_HBZL_transcript10314/f2p0/2008	2	GO:0051082; unfolded protein binding; molecular_function	GO:0031072; heat shock protein binding; molecular_function
transcript_HQ_HBZL_transcript10315/f3p0/2037	2	GO:0006952; defense response; biological_process	GO:0016021; integral to membrane; cellular_component
transcript_HQ_HBZL_transcript10317/f3p0/2026	6	GO:0046660; female sex differentiation; biological_process	GO:0005634; nucleus; cellular_component	GO:0003700; sequence-specific DNA binding transcription factor activity; molecular_function	GO:0006355; regulation of transcription, DNA-dependent; biological_process	GO:0006397; mRNA processing; biological_process	GO:0043565; sequence-specific DNA binding; molecular_function
transcript_HQ_HBZL_transcript10319/f4p0/2005	2	GO:0003924; GTPase activity; molecular_function	GO:0005525; GTP binding; molecular_function
transcript_HQ_HBZL_transcript10320/f3p0/2040	7	GO:0006886; intracellular protein transport; biological_process	GO:0006810; transport; biological_process	GO:0005215; NA	GO:0055085; transmembrane transport; biological_process	GO:0016021; integral to membrane; cellular_component	GO:0005783; endoplasmic reticulum; cellular_component	GO:0016020; membrane; cellular_component
transcript_HQ_HBZL_transcript10323/f3p0/2020	2	GO:0016020; membrane; cellular_component	GO:0015031; protein transport; biological_process
transcript_HQ_HBZL_transcript10326/f2p0/2017	1	GO:0005515; protein binding; molecular_function
transcript_HQ_HBZL_transcript10327/f2p0/2014	10	GO:0051082; unfolded protein binding; molecular_function	GO:0005886; plasma membrane; cellular_component	GO:0070840; dynein complex binding; molecular_function	GO:0006914; autophagy; biological_process	GO:0042803; protein homodimerization activity; molecular_function	GO:0015743; malate transport; biological_process	GO:0019901; protein kinase binding; molecular_function	GO:0005815; microtubule organizing center; cellular_component	GO:0008134; transcription factor binding; molecular_function	GO:0006810; transport; biological_process
transcript_HQ_HBZL_transcript10329/f2p0/2006	1	GO:0005515; protein binding; molecular_function
transcript_HQ_HBZL_transcript10330/f2p0/1992	1	GO:0005515; protein binding; molecular_function
transcript_HQ_HBZL_transcript10334/f4p0/2012	4	GO:0008152; NA	GO:0055114; oxidation-reduction process; biological_process	GO:0004097; catechol oxidase activity; molecular_function	GO:0016491; oxidoreductase activity; molecular_function
transcript_HQ_HBZL_transcript10340/f4p0/2029	2	GO:0016021; integral to membrane; cellular_component	GO:0006952; defense response; biological_process
transcript_HQ_HBZL_transcript10341/f4p0/2009	4	GO:0009058; biosynthetic process; biological_process	GO:0030170; pyridoxal phosphate binding; molecular_function	GO:0016829; lyase activity; molecular_function	GO:0006520; cellular amino acid metabolic process; biological_process
transcript_HQ_HBZL_transcript10343/f21p0/1985	2	GO:0008152; NA	GO:0003824; NA
transcript_HQ_HBZL_transcript10345/f2p0/2017	4	GO:0006886; intracellular protein transport; biological_process	GO:0006888; ER to Golgi vesicle-mediated transport; biological_process	GO:0030127; COPII vesicle coat; cellular_component	GO:0008270; zinc ion binding; molecular_function
transcript_HQ_HBZL_transcript10347/f9p0/2006	7	GO:0005102; receptor binding; molecular_function	GO:0018024; histone-lysine N-methyltransferase activity; molecular_function	GO:0005577; fibrinogen complex; cellular_component	GO:0030168; platelet activation; biological_process	GO:0007165; signal transduction; biological_process	GO:0030674; protein binding, bridging; molecular_function	GO:0051258; protein polymerization; biological_process
transcript_HQ_HBZL_transcript10350/f5p0/2040	4	GO:0016787; hydrolase activity; molecular_function	GO:0047746; chlorophyllase activity; molecular_function	GO:0015996; chlorophyll catabolic process; biological_process	GO:0008152; NA
transcript_HQ_HBZL_transcript10355/f2p0/1990	1	GO:0005515; protein binding; molecular_function
transcript_HQ_HBZL_transcript10356/f4p0/1998	2	GO:0032266; phosphatidylinositol-3-phosphate binding; molecular_function	GO:0043130; ubiquitin binding; molecular_function
transcript_HQ_HBZL_transcript10357/f2p0/2034	3	GO:0006468; protein phosphorylation; biological_process	GO:0004672; protein kinase activity; molecular_function	GO:0005524; ATP binding; molecular_function
transcript_HQ_HBZL_transcript1036/f3p0/3732	3	GO:0006886; intracellular protein transport; biological_process	GO:0008536; Ran GTPase binding; molecular_function	GO:0005515; protein binding; molecular_function
transcript_HQ_HBZL_transcript10362/f3p0/2022	5	GO:0006810; transport; biological_process	GO:0005215; NA	GO:0016021; integral to membrane; cellular_component	GO:0016020; membrane; cellular_component	GO:0000271; polysaccharide biosynthetic process; biological_process
transcript_HQ_HBZL_transcript10363/f6p0/2004	3	GO:0005524; ATP binding; molecular_function	GO:0004672; protein kinase activity; molecular_function	GO:0006468; protein phosphorylation; biological_process
transcript_HQ_HBZL_transcript10365/f3p0/2013	14	GO:0007049; cell cycle; biological_process	GO:0016272; prefoldin complex; cellular_component	GO:0005515; protein binding; molecular_function	GO:0016021; integral to membrane; cellular_component	GO:0005882; intermediate filament; cellular_component	GO:0005198; NA	GO:0031514; motile cilium; cellular_component	GO:0006457; protein folding; biological_process	GO:0006914; autophagy; biological_process	GO:0008053; mitochondrial fusion; biological_process	GO:0051082; unfolded protein binding; molecular_function	GO:0048870; cell motility; biological_process	GO:0005741; mitochondrial outer membrane; cellular_component	GO:0003924; GTPase activity; molecular_function
transcript_HQ_HBZL_transcript10366/f7p0/2017	1	GO:0016765; transferase activity, transferring alkyl or aryl (other than methyl) groups; molecular_function
transcript_HQ_HBZL_transcript10368/f2p0/2053	1	GO:0005515; protein binding; molecular_function
transcript_HQ_HBZL_transcript10369/f2p0/2046	3	GO:0007264; small GTPase mediated signal transduction; biological_process	GO:0002949; NA	GO:0005525; GTP binding; molecular_function
transcript_HQ_HBZL_transcript1037/f6p0/3763	8	GO:0055114; oxidation-reduction process; biological_process	GO:0071949; FAD binding; molecular_function	GO:0016491; oxidoreductase activity; molecular_function	GO:0050660; flavin adenine dinucleotide binding; molecular_function	GO:0016614; oxidoreductase activity, acting on CH-OH group of donors; molecular_function	GO:0008033; tRNA processing; biological_process	GO:0055114; oxidation-reduction process; biological_process	GO:0016614; oxidoreductase activity, acting on CH-OH group of donors; molecular_function
transcript_HQ_HBZL_transcript10370/f3p0/2093	1	GO:0042578; phosphoric ester hydrolase activity; molecular_function
transcript_HQ_HBZL_transcript10374/f3p0/2012	2	GO:0005516; calmodulin binding; molecular_function	GO:0006950; response to stress; biological_process
transcript_HQ_HBZL_transcript10375/f2p0/1979	3	GO:0004672; protein kinase activity; molecular_function	GO:0006468; protein phosphorylation; biological_process	GO:0005524; ATP binding; molecular_function
transcript_HQ_HBZL_transcript10378/f4p0/2014	3	GO:0006164; purine nucleotide biosynthetic process; biological_process	GO:0004019; adenylosuccinate synthase activity; molecular_function	GO:0005525; GTP binding; molecular_function
transcript_HQ_HBZL_transcript1038/f3p0/3755	1	GO:0005515; protein binding; molecular_function
transcript_HQ_HBZL_transcript10380/f3p0/2011	5	GO:0016020; membrane; cellular_component	GO:0003333; amino acid transmembrane transport; biological_process	GO:0006810; transport; biological_process	GO:0015171; amino acid transmembrane transporter activity; molecular_function	GO:0055085; transmembrane transport; biological_process
transcript_HQ_HBZL_transcript10383/f4p0/2042	7	GO:0018024; histone-lysine N-methyltransferase activity; molecular_function	GO:0005102; receptor binding; molecular_function	GO:0005577; fibrinogen complex; cellular_component	GO:0030168; platelet activation; biological_process	GO:0007165; signal transduction; biological_process	GO:0030674; protein binding, bridging; molecular_function	GO:0051258; protein polymerization; biological_process
transcript_HQ_HBZL_transcript10386/f4p0/2007	10	GO:0042823; pyridoxal phosphate biosynthetic process; biological_process	GO:0004359; glutaminase activity; molecular_function	GO:0003824; NA	GO:0009236; cobalamin biosynthetic process; biological_process	GO:0042819; vitamin B6 biosynthetic process; biological_process	GO:0055114; oxidation-reduction process; biological_process	GO:0018580; nitronate monooxygenase activity; molecular_function	GO:0006541; glutamine metabolic process; biological_process	GO:0000105; histidine biosynthetic process; biological_process	GO:0016787; hydrolase activity; molecular_function
transcript_HQ_HBZL_transcript10388/f2p0/2002	2	GO:0008152; NA	GO:0003824; NA
transcript_HQ_HBZL_transcript10389/f3p0/2009	2	GO:0005515; protein binding; molecular_function	GO:0008289; lipid binding; molecular_function
transcript_HQ_HBZL_transcript1039/f7p0/3749	4	GO:0046872; metal ion binding; molecular_function	GO:0007034; vacuolar transport; biological_process	GO:0005515; protein binding; molecular_function	GO:0042802; identical protein binding; molecular_function
transcript_HQ_HBZL_transcript10392/f5p0/2018	4	GO:0004842; ubiquitin-protein ligase activity; molecular_function	GO:0016567; protein ubiquitination; biological_process	GO:0008270; zinc ion binding; molecular_function	GO:0005515; protein binding; molecular_function
transcript_HQ_HBZL_transcript10393/f2p0/2006	2	GO:0008152; NA	GO:0016746; transferase activity, transferring acyl groups; molecular_function
transcript_HQ_HBZL_transcript10399/f4p0/2001	4	GO:0016887; ATPase activity; molecular_function	GO:0005515; protein binding; molecular_function	GO:0043531; ADP binding; molecular_function	GO:0005524; ATP binding; molecular_function
transcript_HQ_HBZL_transcript104/f2p0/5853	2	GO:0003682; chromatin binding; molecular_function	GO:0005634; nucleus; cellular_component
transcript_HQ_HBZL_transcript10400/f2p0/2013	1	GO:0005515; protein binding; molecular_function
transcript_HQ_HBZL_transcript10401/f3p0/2002	3	GO:0005524; ATP binding; molecular_function	GO:0004672; protein kinase activity; molecular_function	GO:0006468; protein phosphorylation; biological_process
transcript_HQ_HBZL_transcript10402/f2p0/1999	4	GO:0016746; transferase activity, transferring acyl groups; molecular_function	GO:0008152; NA	GO:0006213; pyrimidine nucleoside metabolic process; biological_process	GO:0016763; transferase activity, transferring pentosyl groups; molecular_function
transcript_HQ_HBZL_transcript10403/f5p0/2036	4	GO:0050661; NADP binding; molecular_function	GO:0006006; glucose metabolic process; biological_process	GO:0055114; oxidation-reduction process; biological_process	GO:0004345; glucose-6-phosphate dehydrogenase activity; molecular_function
transcript_HQ_HBZL_transcript10409/f5p0/2008	2	GO:0003677; DNA binding; molecular_function	GO:0006355; regulation of transcription, DNA-dependent; biological_process
transcript_HQ_HBZL_transcript1041/f2p0/3747	3	GO:0006396; RNA processing; biological_process	GO:0003676; nucleic acid binding; molecular_function	GO:0003723; RNA binding; molecular_function
transcript_HQ_HBZL_transcript10411/f2p0/2007	4	GO:0005515; protein binding; molecular_function	GO:0015035; protein disulfide oxidoreductase activity; molecular_function	GO:0009055; NA	GO:0045454; cell redox homeostasis; biological_process
transcript_HQ_HBZL_transcript10412/f7p0/2008	2	GO:0008152; NA	GO:0003824; NA
transcript_HQ_HBZL_transcript10413/f2p0/2010	8	GO:0003677; DNA binding; molecular_function	GO:0046872; metal ion binding; molecular_function	GO:0004842; ubiquitin-protein ligase activity; molecular_function	GO:0042128; nitrate assimilation; biological_process	GO:0005515; protein binding; molecular_function	GO:0008270; zinc ion binding; molecular_function	GO:0005634; nucleus; cellular_component	GO:0005680; anaphase-promoting complex; cellular_component
transcript_HQ_HBZL_transcript10414/f2p0/2019	5	GO:0005524; ATP binding; molecular_function	GO:0016020; membrane; cellular_component	GO:0004672; protein kinase activity; molecular_function	GO:0016773; phosphotransferase activity, alcohol group as acceptor; molecular_function	GO:0006468; protein phosphorylation; biological_process
transcript_HQ_HBZL_transcript10418/f6p0/2016	2	GO:0016021; integral to membrane; cellular_component	GO:0055085; transmembrane transport; biological_process
transcript_HQ_HBZL_transcript1042/f5p0/3753	1	GO:0005515; protein binding; molecular_function
transcript_HQ_HBZL_transcript10420/f77p0/1990	4	GO:0015098; molybdate ion transmembrane transporter activity; molecular_function	GO:0055085; transmembrane transport; biological_process	GO:0015689; molybdate ion transport; biological_process	GO:0016021; integral to membrane; cellular_component
transcript_HQ_HBZL_transcript10423/f3p0/2051	1	GO:0046912; transferase activity, transferring acyl groups, acyl groups converted into alkyl on transfer; molecular_function
transcript_HQ_HBZL_transcript10424/f2p0/2024	2	GO:0009116; nucleoside metabolic process; biological_process	GO:0006810; transport; biological_process
transcript_HQ_HBZL_transcript10426/f3p0/2006	4	GO:0016020; membrane; cellular_component	GO:0030001; metal ion transport; biological_process	GO:0055085; transmembrane transport; biological_process	GO:0046873; metal ion transmembrane transporter activity; molecular_function
transcript_HQ_HBZL_transcript10428/f2p0/2080	6	GO:0006281; DNA repair; biological_process	GO:0009379; Holliday junction helicase complex; cellular_component	GO:0006310; DNA recombination; biological_process	GO:0005524; ATP binding; molecular_function	GO:0005515; protein binding; molecular_function	GO:0009378; four-way junction helicase activity; molecular_function
transcript_HQ_HBZL_transcript1043/f4p0/3700	3	GO:0003677; DNA binding; molecular_function	GO:0005634; nucleus; cellular_component	GO:0005515; protein binding; molecular_function
transcript_HQ_HBZL_transcript10431/f10p0/1949	6	GO:0004616; phosphogluconate dehydrogenase (decarboxylating) activity; molecular_function	GO:0003857; 3-hydroxyacyl-CoA dehydrogenase activity; molecular_function	GO:0006631; fatty acid metabolic process; biological_process	GO:0016491; oxidoreductase activity; molecular_function	GO:0006098; pentose-phosphate shunt; biological_process	GO:0055114; oxidation-reduction process; biological_process
transcript_HQ_HBZL_transcript10433/f3p0/2014	5	GO:0016491; oxidoreductase activity; molecular_function	GO:0055114; oxidation-reduction process; biological_process	GO:0018580; nitronate monooxygenase activity; molecular_function	GO:0005737; cytoplasm; cellular_component	GO:0016627; oxidoreductase activity, acting on the CH-CH group of donors; molecular_function
transcript_HQ_HBZL_transcript10437/f3p0/2009	2	GO:0006355; regulation of transcription, DNA-dependent; biological_process	GO:0003677; DNA binding; molecular_function
transcript_HQ_HBZL_transcript10439/f2p0/2004	3	GO:0006094; gluconeogenesis; biological_process	GO:0004612; phosphoenolpyruvate carboxykinase (ATP) activity; molecular_function	GO:0005524; ATP binding; molecular_function
transcript_HQ_HBZL_transcript1044/f3p0/3719	4	GO:0007010; cytoskeleton organization; biological_process	GO:0006260; DNA replication; biological_process	GO:0005634; nucleus; cellular_component	GO:0003779; actin binding; molecular_function
transcript_HQ_HBZL_transcript10443/f2p0/2008	3	GO:0008270; zinc ion binding; molecular_function	GO:0003676; nucleic acid binding; molecular_function	GO:0008080; N-acetyltransferase activity; molecular_function
transcript_HQ_HBZL_transcript10446/f3p0/1999	1	GO:0008270; zinc ion binding; molecular_function
transcript_HQ_HBZL_transcript10448/f2p0/2082	1	GO:0003824; NA
transcript_HQ_HBZL_transcript1045/f2p0/3732	3	GO:0003924; GTPase activity; molecular_function	GO:0005525; GTP binding; molecular_function	GO:0007264; small GTPase mediated signal transduction; biological_process
transcript_HQ_HBZL_transcript10450/f2p0/2014	1	GO:0016817; hydrolase activity, acting on acid anhydrides; molecular_function
transcript_HQ_HBZL_transcript10453/f2p0/2007	5	GO:0043565; sequence-specific DNA binding; molecular_function	GO:0006355; regulation of transcription, DNA-dependent; biological_process	GO:0005634; nucleus; cellular_component	GO:0003677; DNA binding; molecular_function	GO:0003700; sequence-specific DNA binding transcription factor activity; molecular_function
transcript_HQ_HBZL_transcript10454/f4p0/2011	1	GO:0016021; integral to membrane; cellular_component
transcript_HQ_HBZL_transcript10459/f3p0/2009	3	GO:0043565; sequence-specific DNA binding; molecular_function	GO:0003700; sequence-specific DNA binding transcription factor activity; molecular_function	GO:0006355; regulation of transcription, DNA-dependent; biological_process
transcript_HQ_HBZL_transcript1046/f2p0/3739	1	GO:0008641; small protein activating enzyme activity; molecular_function
transcript_HQ_HBZL_transcript10462/f5p0/2026	4	GO:0042545; cell wall modification; biological_process	GO:0004857; enzyme inhibitor activity; molecular_function	GO:0005618; cell wall; cellular_component	GO:0030599; pectinesterase activity; molecular_function
transcript_HQ_HBZL_transcript10475/f8p0/1994	3	GO:0051087; chaperone binding; molecular_function	GO:0019901; protein kinase binding; molecular_function	GO:0005515; protein binding; molecular_function
transcript_HQ_HBZL_transcript10485/f3p0/2008	4	GO:0009058; biosynthetic process; biological_process	GO:0016829; lyase activity; molecular_function	GO:0030170; pyridoxal phosphate binding; molecular_function	GO:0006520; cellular amino acid metabolic process; biological_process
transcript_HQ_HBZL_transcript10486/f15p0/1946	8	GO:0005515; protein binding; molecular_function	GO:0006310; DNA recombination; biological_process	GO:0008134; transcription factor binding; molecular_function	GO:0016887; ATPase activity; molecular_function	GO:0009378; four-way junction helicase activity; molecular_function	GO:0005524; ATP binding; molecular_function	GO:0006355; regulation of transcription, DNA-dependent; biological_process	GO:0006281; DNA repair; biological_process
transcript_HQ_HBZL_transcript10489/f2p0/2004	1	GO:0003824; NA
transcript_HQ_HBZL_transcript10495/f2p0/1993	6	GO:0016773; phosphotransferase activity, alcohol group as acceptor; molecular_function	GO:0004674; protein serine/threonine kinase activity; molecular_function	GO:0006468; protein phosphorylation; biological_process	GO:0004672; protein kinase activity; molecular_function	GO:0016020; membrane; cellular_component	GO:0005524; ATP binding; molecular_function
transcript_HQ_HBZL_transcript1050/f4p0/3734	2	GO:0005509; calcium ion binding; molecular_function	GO:0004553; hydrolase activity, hydrolyzing O-glycosyl compounds; molecular_function
transcript_HQ_HBZL_transcript10501/f7p0/1998	2	GO:0008152; NA	GO:0003824; NA
transcript_HQ_HBZL_transcript10503/f9p0/1941	1	GO:0016757; transferase activity, transferring glycosyl groups; molecular_function
transcript_HQ_HBZL_transcript10507/f6p0/1956	11	GO:0006310; DNA recombination; biological_process	GO:0003723; RNA binding; molecular_function	GO:0008134; transcription factor binding; molecular_function	GO:0019079; viral genome replication; biological_process	GO:0003724; RNA helicase activity; molecular_function	GO:0006281; DNA repair; biological_process	GO:0006355; regulation of transcription, DNA-dependent; biological_process	GO:0003678; DNA helicase activity; molecular_function	GO:0005524; ATP binding; molecular_function	GO:0009378; four-way junction helicase activity; molecular_function	GO:0016887; ATPase activity; molecular_function
transcript_HQ_HBZL_transcript1051/f4p0/3633	2	GO:0008152; NA	GO:0016624; oxidoreductase activity, acting on the aldehyde or oxo group of donors, disulfide as acceptor; molecular_function
transcript_HQ_HBZL_transcript10510/f2p0/1498	5	GO:0016020; membrane; cellular_component	GO:0005524; ATP binding; molecular_function	GO:0006468; protein phosphorylation; biological_process	GO:0016773; phosphotransferase activity, alcohol group as acceptor; molecular_function	GO:0004672; protein kinase activity; molecular_function
transcript_HQ_HBZL_transcript10512/f4p0/2000	5	GO:0005524; ATP binding; molecular_function	GO:0016020; membrane; cellular_component	GO:0004672; protein kinase activity; molecular_function	GO:0006468; protein phosphorylation; biological_process	GO:0016773; phosphotransferase activity, alcohol group as acceptor; molecular_function
transcript_HQ_HBZL_transcript10513/f2p0/1990	3	GO:0006468; protein phosphorylation; biological_process	GO:0004672; protein kinase activity; molecular_function	GO:0005524; ATP binding; molecular_function
transcript_HQ_HBZL_transcript10514/f6p0/1998	2	GO:0006508; proteolysis; biological_process	GO:0004185; serine-type carboxypeptidase activity; molecular_function
transcript_HQ_HBZL_transcript10515/f6p0/2005	13	GO:0071949; FAD binding; molecular_function	GO:0016021; integral to membrane; cellular_component	GO:0006631; fatty acid metabolic process; biological_process	GO:0003857; 3-hydroxyacyl-CoA dehydrogenase activity; molecular_function	GO:0046168; glycerol-3-phosphate catabolic process; biological_process	GO:0016491; oxidoreductase activity; molecular_function	GO:0008677; 2-dehydropantoate 2-reductase activity; molecular_function	GO:0004506; squalene monooxygenase activity; molecular_function	GO:0055114; oxidation-reduction process; biological_process	GO:0016616; oxidoreductase activity, acting on the CH-OH group of donors, NAD or NADP as acceptor; molecular_function	GO:0008033; tRNA processing; biological_process	GO:0051287; NAD binding; molecular_function	GO:0050660; flavin adenine dinucleotide binding; molecular_function
transcript_HQ_HBZL_transcript10517/f12p0/1993	3	GO:0006633; fatty acid biosynthetic process; biological_process	GO:0016020; membrane; cellular_component	GO:0016747; transferase activity, transferring acyl groups other than amino-acyl groups; molecular_function
transcript_HQ_HBZL_transcript10518/f16p0/1954	3	GO:0001700; embryonic development via the syncytial blastoderm; biological_process	GO:0009405; pathogenesis; biological_process	GO:0007259; JAK-STAT cascade; biological_process
transcript_HQ_HBZL_transcript1052/f5p0/3638	1	GO:0003676; nucleic acid binding; molecular_function
transcript_HQ_HBZL_transcript10521/f2p0/2008	4	GO:0055114; oxidation-reduction process; biological_process	GO:0020037; heme binding; molecular_function	GO:0016491; oxidoreductase activity; molecular_function	GO:0051536; iron-sulfur cluster binding; molecular_function
transcript_HQ_HBZL_transcript1053/f6p0/3710	4	GO:0008270; zinc ion binding; molecular_function	GO:0005515; protein binding; molecular_function	GO:0016192; vesicle-mediated transport; biological_process	GO:0006886; intracellular protein transport; biological_process
transcript_HQ_HBZL_transcript10531/f2p0/2002	3	GO:0055114; oxidation-reduction process; biological_process	GO:0005507; copper ion binding; molecular_function	GO:0016491; oxidoreductase activity; molecular_function
transcript_HQ_HBZL_transcript10534/f7p0/1997	4	GO:0050662; coenzyme binding; molecular_function	GO:0055114; oxidation-reduction process; biological_process	GO:0003824; NA	GO:0016491; oxidoreductase activity; molecular_function
transcript_HQ_HBZL_transcript10539/f14p0/1970	5	GO:0006855; drug transmembrane transport; biological_process	GO:0016020; membrane; cellular_component	GO:0015297; antiporter activity; molecular_function	GO:0015238; drug transmembrane transporter activity; molecular_function	GO:0055085; transmembrane transport; biological_process
transcript_HQ_HBZL_transcript10544/f3p0/1988	1	GO:0005524; ATP binding; molecular_function
transcript_HQ_HBZL_transcript10545/f3p0/1999	2	GO:0016020; membrane; cellular_component	GO:0015031; protein transport; biological_process
transcript_HQ_HBZL_transcript10549/f8p0/2029	4	GO:0005618; cell wall; cellular_component	GO:0030599; pectinesterase activity; molecular_function	GO:0004857; enzyme inhibitor activity; molecular_function	GO:0042545; cell wall modification; biological_process
transcript_HQ_HBZL_transcript10550/f15p0/1982	5	GO:0030127; COPII vesicle coat; cellular_component	GO:0006888; ER to Golgi vesicle-mediated transport; biological_process	GO:0046872; metal ion binding; molecular_function	GO:0006886; intracellular protein transport; biological_process	GO:0008270; zinc ion binding; molecular_function
transcript_HQ_HBZL_transcript10552/f6p0/2006	3	GO:0022857; transmembrane transporter activity; molecular_function	GO:0055085; transmembrane transport; biological_process	GO:0016021; integral to membrane; cellular_component
transcript_HQ_HBZL_transcript10554/f2p0/2059	2	GO:0016788; hydrolase activity, acting on ester bonds; molecular_function	GO:0016787; hydrolase activity; molecular_function
transcript_HQ_HBZL_transcript10556/f2p0/1502	4	GO:0005634; nucleus; cellular_component	GO:0004725; protein tyrosine phosphatase activity; molecular_function	GO:0008138; protein tyrosine/serine/threonine phosphatase activity; molecular_function	GO:0006470; protein dephosphorylation; biological_process
transcript_HQ_HBZL_transcript1056/f3p0/3748	4	GO:0008270; zinc ion binding; molecular_function	GO:0006886; intracellular protein transport; biological_process	GO:0030127; COPII vesicle coat; cellular_component	GO:0006888; ER to Golgi vesicle-mediated transport; biological_process
transcript_HQ_HBZL_transcript10564/f3p0/2008	2	GO:0006099; tricarboxylic acid cycle; biological_process	GO:0016829; lyase activity; molecular_function
transcript_HQ_HBZL_transcript10568/f5p0/2004	3	GO:0043565; sequence-specific DNA binding; molecular_function	GO:0006355; regulation of transcription, DNA-dependent; biological_process	GO:0003700; sequence-specific DNA binding transcription factor activity; molecular_function
transcript_HQ_HBZL_transcript1057/f2p0/3751	2	GO:0046872; metal ion binding; molecular_function	GO:0000166; nucleotide binding; molecular_function
transcript_HQ_HBZL_transcript10570/f13p0/1978	4	GO:0004672; protein kinase activity; molecular_function	GO:0006468; protein phosphorylation; biological_process	GO:0030247; polysaccharide binding; molecular_function	GO:0005524; ATP binding; molecular_function
transcript_HQ_HBZL_transcript10575/f3p0/1985	4	GO:0000287; magnesium ion binding; molecular_function	GO:0016829; lyase activity; molecular_function	GO:0010333; terpene synthase activity; molecular_function	GO:0008152; NA
transcript_HQ_HBZL_transcript10576/f3p0/1992	4	GO:0005524; ATP binding; molecular_function	GO:0003677; DNA binding; molecular_function	GO:0016787; hydrolase activity; molecular_function	GO:0003676; nucleic acid binding; molecular_function
transcript_HQ_HBZL_transcript10578/f3p0/1996	2	GO:0008270; zinc ion binding; molecular_function	GO:0005515; protein binding; molecular_function
transcript_HQ_HBZL_transcript10579/f2p0/2034	2	GO:0045017; glycerolipid biosynthetic process; biological_process	GO:0004144; diacylglycerol O-acyltransferase activity; molecular_function
transcript_HQ_HBZL_transcript10581/f3p0/2001	3	GO:0055114; oxidation-reduction process; biological_process	GO:0005507; copper ion binding; molecular_function	GO:0016491; oxidoreductase activity; molecular_function
transcript_HQ_HBZL_transcript10582/f3p0/1991	3	GO:0016020; membrane; cellular_component	GO:0005215; NA	GO:0006810; transport; biological_process
transcript_HQ_HBZL_transcript10591/f2p0/1997	3	GO:0005215; NA	GO:0006810; transport; biological_process	GO:0003860; 3-hydroxyisobutyryl-CoA hydrolase activity; molecular_function
transcript_HQ_HBZL_transcript10592/f2p0/1999	4	GO:0007059; chromosome segregation; biological_process	GO:0051301; cell division; biological_process	GO:0008017; microtubule binding; molecular_function	GO:0046983; protein dimerization activity; molecular_function
transcript_HQ_HBZL_transcript10595/f4p0/1999	1	GO:0005515; protein binding; molecular_function
transcript_HQ_HBZL_transcript10596/f2p0/1992	1	GO:0030247; polysaccharide binding; molecular_function
transcript_HQ_HBZL_transcript10597/f8p0/2011	3	GO:0004672; protein kinase activity; molecular_function	GO:0006468; protein phosphorylation; biological_process	GO:0005524; ATP binding; molecular_function
transcript_HQ_HBZL_transcript1060/f5p0/3787	4	GO:0006468; protein phosphorylation; biological_process	GO:0004672; protein kinase activity; molecular_function	GO:0005515; protein binding; molecular_function	GO:0005524; ATP binding; molecular_function
transcript_HQ_HBZL_transcript10604/f3p0/1990	1	GO:0005515; protein binding; molecular_function
transcript_HQ_HBZL_transcript10606/f2p0/1991	1	GO:0008270; zinc ion binding; molecular_function
transcript_HQ_HBZL_transcript10607/f2p0/1989	1	GO:0005515; protein binding; molecular_function
transcript_HQ_HBZL_transcript10609/f2p0/1996	4	GO:0055114; oxidation-reduction process; biological_process	GO:0016705; oxidoreductase activity, acting on paired donors, with incorporation or reduction of molecular oxygen; molecular_function	GO:0020037; heme binding; molecular_function	GO:0005506; iron ion binding; molecular_function
transcript_HQ_HBZL_transcript10612/f2p0/1992	8	GO:0055114; oxidation-reduction process; biological_process	GO:0050660; flavin adenine dinucleotide binding; molecular_function	GO:0008033; tRNA processing; biological_process	GO:0071949; FAD binding; molecular_function	GO:0016491; oxidoreductase activity; molecular_function	GO:0050151; oleate hydratase activity; molecular_function	GO:0003857; 3-hydroxyacyl-CoA dehydrogenase activity; molecular_function	GO:0006631; fatty acid metabolic process; biological_process
transcript_HQ_HBZL_transcript10614/f6p0/2029	6	GO:0016301; kinase activity; molecular_function	GO:0007205; activation of protein kinase C activity by G-protein coupled receptor protein signaling pathway; biological_process	GO:0008152; NA	GO:0006741; NADP biosynthetic process; biological_process	GO:0004143; diacylglycerol kinase activity; molecular_function	GO:0003951; NAD+ kinase activity; molecular_function
transcript_HQ_HBZL_transcript10615/f2p0/2032	1	GO:0007165; signal transduction; biological_process
transcript_HQ_HBZL_transcript10618/f8p0/2059	2	GO:0016757; transferase activity, transferring glycosyl groups; molecular_function	GO:0006486; protein glycosylation; biological_process
transcript_HQ_HBZL_transcript10622/f35p0/1980	2	GO:0003849; 3-deoxy-7-phosphoheptulonate synthase activity; molecular_function	GO:0009073; aromatic amino acid family biosynthetic process; biological_process
transcript_HQ_HBZL_transcript10623/f39p0/1825	2	GO:0004553; hydrolase activity, hydrolyzing O-glycosyl compounds; molecular_function	GO:0005975; carbohydrate metabolic process; biological_process
transcript_HQ_HBZL_transcript10625/f11p0/1994	5	GO:0006814; sodium ion transport; biological_process	GO:0055085; transmembrane transport; biological_process	GO:0005215; NA	GO:0016020; membrane; cellular_component	GO:0016021; integral to membrane; cellular_component
transcript_HQ_HBZL_transcript10628/f3p0/2031	1	GO:0005515; protein binding; molecular_function
transcript_HQ_HBZL_transcript10629/f6p0/2022	3	GO:0005975; carbohydrate metabolic process; biological_process	GO:0005524; ATP binding; molecular_function	GO:0016773; phosphotransferase activity, alcohol group as acceptor; molecular_function
transcript_HQ_HBZL_transcript1063/f5p0/3721	4	GO:0019901; protein kinase binding; molecular_function	GO:0003677; DNA binding; molecular_function	GO:0008289; lipid binding; molecular_function	GO:0006355; regulation of transcription, DNA-dependent; biological_process
transcript_HQ_HBZL_transcript10630/f2p0/2003	8	GO:0006468; protein phosphorylation; biological_process	GO:0016020; membrane; cellular_component	GO:0006364; rRNA processing; biological_process	GO:0005524; ATP binding; molecular_function	GO:0016773; phosphotransferase activity, alcohol group as acceptor; molecular_function	GO:0007165; signal transduction; biological_process	GO:0004672; protein kinase activity; molecular_function	GO:0032040; small-subunit processome; cellular_component
transcript_HQ_HBZL_transcript10632/f3p0/1993	1	GO:0003824; NA
transcript_HQ_HBZL_transcript10635/f3p0/2000	1	GO:0046983; protein dimerization activity; molecular_function
transcript_HQ_HBZL_transcript10636/f2p0/1989	2	GO:0006351; transcription, DNA-dependent; biological_process	GO:0003899; DNA-directed RNA polymerase activity; molecular_function
transcript_HQ_HBZL_transcript10638/f5p0/1996	9	GO:0016773; phosphotransferase activity, alcohol group as acceptor; molecular_function	GO:0019031; viral envelope; cellular_component	GO:0007165; signal transduction; biological_process	GO:0004672; protein kinase activity; molecular_function	GO:0016020; membrane; cellular_component	GO:0005524; ATP binding; molecular_function	GO:0046789; host cell surface receptor binding; molecular_function	GO:0006468; protein phosphorylation; biological_process	GO:0019064; viral envelope fusion with host membrane; biological_process
transcript_HQ_HBZL_transcript1064/f2p0/3718	4	GO:0015689; molybdate ion transport; biological_process	GO:0015098; molybdate ion transmembrane transporter activity; molecular_function	GO:0016020; membrane; cellular_component	GO:0016021; integral to membrane; cellular_component
transcript_HQ_HBZL_transcript10640/f2p0/2022	3	GO:0005524; ATP binding; molecular_function	GO:0005975; carbohydrate metabolic process; biological_process	GO:0016773; phosphotransferase activity, alcohol group as acceptor; molecular_function
transcript_HQ_HBZL_transcript10641/f5p0/2002	1	GO:0016021; integral to membrane; cellular_component
transcript_HQ_HBZL_transcript10642/f7p0/2013	3	GO:0006468; protein phosphorylation; biological_process	GO:0004672; protein kinase activity; molecular_function	GO:0005524; ATP binding; molecular_function
transcript_HQ_HBZL_transcript10643/f2p0/1991	2	GO:0016020; membrane; cellular_component	GO:0015031; protein transport; biological_process
transcript_HQ_HBZL_transcript10644/f22p0/1992	1	GO:0005515; protein binding; molecular_function
transcript_HQ_HBZL_transcript10645/f2p0/1999	4	GO:0005515; protein binding; molecular_function	GO:0015991; ATP hydrolysis coupled proton transport; biological_process	GO:0000221; vacuolar proton-transporting V-type ATPase, V1 domain; cellular_component	GO:0016820; hydrolase activity, acting on acid anhydrides, catalyzing transmembrane movement of substances; molecular_function
transcript_HQ_HBZL_transcript10649/f2p0/1989	1	GO:0000902; cell morphogenesis; biological_process
transcript_HQ_HBZL_transcript10653/f10p0/1990	1	GO:0006629; lipid metabolic process; biological_process
transcript_HQ_HBZL_transcript10657/f2p0/2052	5	GO:0016020; membrane; cellular_component	GO:0005524; ATP binding; molecular_function	GO:0006468; protein phosphorylation; biological_process	GO:0016773; phosphotransferase activity, alcohol group as acceptor; molecular_function	GO:0004672; protein kinase activity; molecular_function
transcript_HQ_HBZL_transcript10658/f3p0/1981	1	GO:0046912; transferase activity, transferring acyl groups, acyl groups converted into alkyl on transfer; molecular_function
transcript_HQ_HBZL_transcript1066/f6p0/3775	3	GO:0005516; calmodulin binding; molecular_function	GO:0000166; nucleotide binding; molecular_function	GO:0046872; metal ion binding; molecular_function
transcript_HQ_HBZL_transcript10661/f111p0/1919	5	GO:0008033; tRNA processing; biological_process	GO:0050660; flavin adenine dinucleotide binding; molecular_function	GO:0016491; oxidoreductase activity; molecular_function	GO:0071949; FAD binding; molecular_function	GO:0055114; oxidation-reduction process; biological_process
transcript_HQ_HBZL_transcript10662/f5p0/1992	5	GO:0004842; ubiquitin-protein ligase activity; molecular_function	GO:0005680; anaphase-promoting complex; cellular_component	GO:0046872; metal ion binding; molecular_function	GO:0008270; zinc ion binding; molecular_function	GO:0005515; protein binding; molecular_function
transcript_HQ_HBZL_transcript10663/f2p0/2026	2	GO:0004575; sucrose alpha-glucosidase activity; molecular_function	GO:0004564; beta-fructofuranosidase activity; molecular_function
transcript_HQ_HBZL_transcript10665/f2p0/1999	1	GO:0003676; nucleic acid binding; molecular_function
transcript_HQ_HBZL_transcript10668/f6p0/1987	5	GO:0015031; protein transport; biological_process	GO:0055114; oxidation-reduction process; biological_process	GO:0015031; protein transport; biological_process	GO:0042138; meiotic DNA double-strand break formation; biological_process	GO:0016491; oxidoreductase activity; molecular_function
transcript_HQ_HBZL_transcript10670/f2p0/1987	2	GO:0005975; carbohydrate metabolic process; biological_process	GO:0016853; isomerase activity; molecular_function
transcript_HQ_HBZL_transcript10671/f2p0/1988	4	GO:0009058; biosynthetic process; biological_process	GO:0030170; pyridoxal phosphate binding; molecular_function	GO:0016829; lyase activity; molecular_function	GO:0006520; cellular amino acid metabolic process; biological_process
transcript_HQ_HBZL_transcript10674/f4p0/1992	6	GO:0046872; metal ion binding; molecular_function	GO:0005680; anaphase-promoting complex; cellular_component	GO:0004842; ubiquitin-protein ligase activity; molecular_function	GO:0003723; RNA binding; molecular_function	GO:0005515; protein binding; molecular_function	GO:0008270; zinc ion binding; molecular_function
transcript_HQ_HBZL_transcript10677/f3p0/1991	1	GO:0005096; GTPase activator activity; molecular_function
transcript_HQ_HBZL_transcript10678/f2p0/1995	3	GO:0003676; nucleic acid binding; molecular_function	GO:0003723; RNA binding; molecular_function	GO:0016020; membrane; cellular_component
transcript_HQ_HBZL_transcript10679/f2p0/2023	5	GO:0005524; ATP binding; molecular_function	GO:0016010; dystrophin-associated glycoprotein complex; cellular_component	GO:0004672; protein kinase activity; molecular_function	GO:0007016; cytoskeletal anchoring at plasma membrane; biological_process	GO:0006468; protein phosphorylation; biological_process
transcript_HQ_HBZL_transcript1068/f2p0/3717	4	GO:0006606; protein import into nucleus; biological_process	GO:0005515; protein binding; molecular_function	GO:0008270; zinc ion binding; molecular_function	GO:0046872; metal ion binding; molecular_function
transcript_HQ_HBZL_transcript10680/f4p0/1997	5	GO:0005886; plasma membrane; cellular_component	GO:0016757; transferase activity, transferring glycosyl groups; molecular_function	GO:0016020; membrane; cellular_component	GO:0006171; cAMP biosynthetic process; biological_process	GO:0004016; adenylate cyclase activity; molecular_function
transcript_HQ_HBZL_transcript10681/f2p0/2000	1	GO:0005515; protein binding; molecular_function
transcript_HQ_HBZL_transcript10685/f8p0/1971	3	GO:0008290; F-actin capping protein complex; cellular_component	GO:0051016; barbed-end actin filament capping; biological_process	GO:0006508; proteolysis; biological_process
transcript_HQ_HBZL_transcript10688/f3p0/1993	3	GO:0005215; NA	GO:0006810; transport; biological_process	GO:0016020; membrane; cellular_component
transcript_HQ_HBZL_transcript10692/f2p0/1983	4	GO:0004674; protein serine/threonine kinase activity; molecular_function	GO:0009058; biosynthetic process; biological_process	GO:0003779; actin binding; molecular_function	GO:0016740; transferase activity; molecular_function
transcript_HQ_HBZL_transcript10693/f8p0/1988	4	GO:0005737; cytoplasm; cellular_component	GO:0003743; translation initiation factor activity; molecular_function	GO:0008023; transcription elongation factor complex; cellular_component	GO:0005852; eukaryotic translation initiation factor 3 complex; cellular_component
transcript_HQ_HBZL_transcript10695/f3p0/1991	3	GO:0008289; lipid binding; molecular_function	GO:0009405; pathogenesis; biological_process	GO:0005515; protein binding; molecular_function
transcript_HQ_HBZL_transcript10696/f2p0/1984	4	GO:0006352; transcription initiation, DNA-dependent; biological_process	GO:0006270; DNA-dependent DNA replication initiation; biological_process	GO:0005515; protein binding; molecular_function	GO:0005669; transcription factor TFIID complex; cellular_component
transcript_HQ_HBZL_transcript10697/f2p0/1983	1	GO:0003824; NA
transcript_HQ_HBZL_transcript10699/f3p0/2002	3	GO:0016020; membrane; cellular_component	GO:0006810; transport; biological_process	GO:0005215; NA
transcript_HQ_HBZL_transcript107/f2p0/5844	1	GO:0005515; protein binding; molecular_function
transcript_HQ_HBZL_transcript1070/f2p0/3717	8	GO:0000166; nucleotide binding; molecular_function	GO:0004832; valine-tRNA ligase activity; molecular_function	GO:0005524; ATP binding; molecular_function	GO:0004812; aminoacyl-tRNA ligase activity; molecular_function	GO:0006418; tRNA aminoacylation for protein translation; biological_process	GO:0005737; cytoplasm; cellular_component	GO:0002161; aminoacyl-tRNA editing activity; molecular_function	GO:0006438; valyl-tRNA aminoacylation; biological_process
transcript_HQ_HBZL_transcript10702/f3p0/2044	2	GO:0006355; regulation of transcription, DNA-dependent; biological_process	GO:0003700; sequence-specific DNA binding transcription factor activity; molecular_function
transcript_HQ_HBZL_transcript10703/f4p0/1978	12	GO:0005198; NA	GO:0008289; lipid binding; molecular_function	GO:0019031; viral envelope; cellular_component	GO:0006869; lipid transport; biological_process	GO:0005576; NA	GO:0016020; membrane; cellular_component	GO:0019028; viral capsid; cellular_component	GO:0030001; metal ion transport; biological_process	GO:0055085; transmembrane transport; biological_process	GO:0046873; metal ion transmembrane transporter activity; molecular_function	GO:0005882; intermediate filament; cellular_component	GO:0042157; lipoprotein metabolic process; biological_process
transcript_HQ_HBZL_transcript10704/f7p0/2017	3	GO:0015095; magnesium ion transmembrane transporter activity; molecular_function	GO:0015693; magnesium ion transport; biological_process	GO:0016021; integral to membrane; cellular_component
transcript_HQ_HBZL_transcript10705/f2p0/2002	2	GO:0006464; protein modification process; biological_process	GO:0015031; protein transport; biological_process
transcript_HQ_HBZL_transcript1071/f3p0/3709	4	GO:0005515; protein binding; molecular_function	GO:0016887; ATPase activity; molecular_function	GO:0005524; ATP binding; molecular_function	GO:0043531; ADP binding; molecular_function
transcript_HQ_HBZL_transcript10718/f2p0/1981	3	GO:0005975; carbohydrate metabolic process; biological_process	GO:0004476; mannose-6-phosphate isomerase activity; molecular_function	GO:0008270; zinc ion binding; molecular_function
transcript_HQ_HBZL_transcript10719/f3p0/1996	3	GO:0015696; ammonium transport; biological_process	GO:0008519; ammonium transmembrane transporter activity; molecular_function	GO:0016020; membrane; cellular_component
transcript_HQ_HBZL_transcript1072/f2p0/3791	1	GO:0016020; membrane; cellular_component
transcript_HQ_HBZL_transcript10720/f2p0/1997	4	GO:0016638; oxidoreductase activity, acting on the CH-NH2 group of donors; molecular_function	GO:0055114; oxidation-reduction process; biological_process	GO:0004733; pyridoxamine-phosphate oxidase activity; molecular_function	GO:0010181; FMN binding; molecular_function
transcript_HQ_HBZL_transcript10721/f3p0/1994	2	GO:0016021; integral to membrane; cellular_component	GO:0055085; transmembrane transport; biological_process
transcript_HQ_HBZL_transcript10725/f4p0/1985	10	GO:0031418; L-ascorbic acid binding; molecular_function	GO:0005506; iron ion binding; molecular_function	GO:0004674; protein serine/threonine kinase activity; molecular_function	GO:0006468; protein phosphorylation; biological_process	GO:0016020; membrane; cellular_component	GO:0016706; oxidoreductase activity, acting on paired donors, with incorporation or reduction of molecular oxygen, 2-oxoglutarate as one donor, and incorporation of one atom each of oxygen into both donors; molecular_function	GO:0055114; oxidation-reduction process; biological_process	GO:0005524; ATP binding; molecular_function	GO:0016773; phosphotransferase activity, alcohol group as acceptor; molecular_function	GO:0004672; protein kinase activity; molecular_function
transcript_HQ_HBZL_transcript10727/f2p0/1981	2	GO:0045017; glycerolipid biosynthetic process; biological_process	GO:0004144; diacylglycerol O-acyltransferase activity; molecular_function
transcript_HQ_HBZL_transcript10729/f3p0/1981	6	GO:0003677; DNA binding; molecular_function	GO:0016579; protein deubiquitination; biological_process	GO:0008270; zinc ion binding; molecular_function	GO:0003887; DNA-directed DNA polymerase activity; molecular_function	GO:0006351; transcription, DNA-dependent; biological_process	GO:0036459; NA
transcript_HQ_HBZL_transcript1073/f3p0/3712	2	GO:0003824; NA	GO:0005992; trehalose biosynthetic process; biological_process
transcript_HQ_HBZL_transcript10735/f7p0/1990	2	GO:0004185; serine-type carboxypeptidase activity; molecular_function	GO:0006508; proteolysis; biological_process
transcript_HQ_HBZL_transcript10736/f3p0/1983	4	GO:0005783; endoplasmic reticulum; cellular_component	GO:0051082; unfolded protein binding; molecular_function	GO:0006457; protein folding; biological_process	GO:0005509; calcium ion binding; molecular_function
transcript_HQ_HBZL_transcript10737/f15p0/1983	2	GO:0006355; regulation of transcription, DNA-dependent; biological_process	GO:0003700; sequence-specific DNA binding transcription factor activity; molecular_function
transcript_HQ_HBZL_transcript10739/f11p0/2001	3	GO:0005524; ATP binding; molecular_function	GO:0004672; protein kinase activity; molecular_function	GO:0006468; protein phosphorylation; biological_process
transcript_HQ_HBZL_transcript1074/f4p0/3741	4	GO:0004672; protein kinase activity; molecular_function	GO:0006468; protein phosphorylation; biological_process	GO:0005524; ATP binding; molecular_function	GO:0005515; protein binding; molecular_function
transcript_HQ_HBZL_transcript10740/f4p0/1995	10	GO:0000049; tRNA binding; molecular_function	GO:0003676; nucleic acid binding; molecular_function	GO:0043039; tRNA aminoacylation; biological_process	GO:0000166; nucleotide binding; molecular_function	GO:0019028; viral capsid; cellular_component	GO:0005524; ATP binding; molecular_function	GO:0006418; tRNA aminoacylation for protein translation; biological_process	GO:0004812; aminoacyl-tRNA ligase activity; molecular_function	GO:0005737; cytoplasm; cellular_component	GO:0005198; NA
transcript_HQ_HBZL_transcript10745/f2p0/1993	3	GO:0005515; protein binding; molecular_function	GO:0016844; strictosidine synthase activity; molecular_function	GO:0009058; biosynthetic process; biological_process
transcript_HQ_HBZL_transcript1075/f6p0/3759	4	GO:0006355; regulation of transcription, DNA-dependent; biological_process	GO:0009725; response to hormone stimulus; biological_process	GO:0003677; DNA binding; molecular_function	GO:0005634; nucleus; cellular_component
transcript_HQ_HBZL_transcript10752/f2p0/1989	2	GO:0004185; serine-type carboxypeptidase activity; molecular_function	GO:0006508; proteolysis; biological_process
transcript_HQ_HBZL_transcript10753/f3p0/2021	3	GO:0005524; ATP binding; molecular_function	GO:0006468; protein phosphorylation; biological_process	GO:0004672; protein kinase activity; molecular_function
transcript_HQ_HBZL_transcript10755/f2p0/1979	3	GO:0005215; NA	GO:0006810; transport; biological_process	GO:0016020; membrane; cellular_component
transcript_HQ_HBZL_transcript10756/f2p0/1988	2	GO:0010277; chlorophyllide a oxygenase [overall] activity; molecular_function	GO:0055114; oxidation-reduction process; biological_process
transcript_HQ_HBZL_transcript10757/f3p0/2030	11	GO:0019079; viral genome replication; biological_process	GO:0008134; transcription factor binding; molecular_function	GO:0006310; DNA recombination; biological_process	GO:0003723; RNA binding; molecular_function	GO:0006355; regulation of transcription, DNA-dependent; biological_process	GO:0003724; RNA helicase activity; molecular_function	GO:0006281; DNA repair; biological_process	GO:0009378; four-way junction helicase activity; molecular_function	GO:0016887; ATPase activity; molecular_function	GO:0005524; ATP binding; molecular_function	GO:0003678; DNA helicase activity; molecular_function
transcript_HQ_HBZL_transcript10758/f12p0/1983	2	GO:0006355; regulation of transcription, DNA-dependent; biological_process	GO:0003677; DNA binding; molecular_function
transcript_HQ_HBZL_transcript1076/f7p0/3707	2	GO:0006886; intracellular protein transport; biological_process	GO:0016192; vesicle-mediated transport; biological_process
transcript_HQ_HBZL_transcript10761/f3p0/1982	2	GO:0016021; integral to membrane; cellular_component	GO:0005515; protein binding; molecular_function
transcript_HQ_HBZL_transcript10764/f5p0/2001	5	GO:0005737; cytoplasm; cellular_component	GO:0008565; protein transporter activity; molecular_function	GO:0016020; membrane; cellular_component	GO:0016021; integral to membrane; cellular_component	GO:0006886; intracellular protein transport; biological_process
transcript_HQ_HBZL_transcript10767/f6p0/1502	1	GO:0016020; membrane; cellular_component
transcript_HQ_HBZL_transcript10768/f2p0/2013	2	GO:0004853; uroporphyrinogen decarboxylase activity; molecular_function	GO:0006779; porphyrin biosynthetic process; biological_process
transcript_HQ_HBZL_transcript10769/f2p0/1975	5	GO:0006508; proteolysis; biological_process	GO:0016787; hydrolase activity; molecular_function	GO:0016042; lipid catabolic process; biological_process	GO:0004806; triglyceride lipase activity; molecular_function	GO:0008236; serine-type peptidase activity; molecular_function
transcript_HQ_HBZL_transcript1077/f3p0/3706	1	GO:0006508; proteolysis; biological_process
transcript_HQ_HBZL_transcript10770/f4p0/2012	2	GO:0003824; NA	GO:0050662; coenzyme binding; molecular_function
transcript_HQ_HBZL_transcript10774/f4p0/2006	4	GO:0016567; protein ubiquitination; biological_process	GO:0005515; protein binding; molecular_function	GO:0008270; zinc ion binding; molecular_function	GO:0004842; ubiquitin-protein ligase activity; molecular_function
transcript_HQ_HBZL_transcript10775/f2p0/1993	3	GO:0005524; ATP binding; molecular_function	GO:0006468; protein phosphorylation; biological_process	GO:0004672; protein kinase activity; molecular_function
transcript_HQ_HBZL_transcript10776/f4p0/1975	4	GO:0016021; integral to membrane; cellular_component	GO:0000041; transition metal ion transport; biological_process	GO:0055085; transmembrane transport; biological_process	GO:0022857; transmembrane transporter activity; molecular_function
transcript_HQ_HBZL_transcript10778/f6p0/1925	8	GO:0008948; oxaloacetate decarboxylase activity; molecular_function	GO:0005509; calcium ion binding; molecular_function	GO:0005783; endoplasmic reticulum; cellular_component	GO:0006457; protein folding; biological_process	GO:0071436; sodium ion export; biological_process	GO:0016020; membrane; cellular_component	GO:0015081; sodium ion transmembrane transporter activity; molecular_function	GO:0051082; unfolded protein binding; molecular_function
transcript_HQ_HBZL_transcript10779/f3p0/2005	4	GO:0050661; NADP binding; molecular_function	GO:0006006; glucose metabolic process; biological_process	GO:0004345; glucose-6-phosphate dehydrogenase activity; molecular_function	GO:0055114; oxidation-reduction process; biological_process
transcript_HQ_HBZL_transcript10780/f2p0/1989	4	GO:0005506; iron ion binding; molecular_function	GO:0020037; heme binding; molecular_function	GO:0016705; oxidoreductase activity, acting on paired donors, with incorporation or reduction of molecular oxygen; molecular_function	GO:0055114; oxidation-reduction process; biological_process
transcript_HQ_HBZL_transcript10783/f2p0/2000	3	GO:0003677; DNA binding; molecular_function	GO:0003896; DNA primase activity; molecular_function	GO:0006269; DNA replication, synthesis of RNA primer; biological_process
transcript_HQ_HBZL_transcript10784/f2p0/1991	3	GO:0046872; metal ion binding; molecular_function	GO:0008270; zinc ion binding; molecular_function	GO:0005515; protein binding; molecular_function
transcript_HQ_HBZL_transcript10785/f4p0/1987	3	GO:0006468; protein phosphorylation; biological_process	GO:0004672; protein kinase activity; molecular_function	GO:0005524; ATP binding; molecular_function
transcript_HQ_HBZL_transcript10787/f3p0/1982	1	GO:0015031; protein transport; biological_process
transcript_HQ_HBZL_transcript10788/f2p0/1969	3	GO:0019083; viral transcription; biological_process	GO:0005524; ATP binding; molecular_function	GO:0016301; kinase activity; molecular_function
transcript_HQ_HBZL_transcript1079/f11p0/3719	5	GO:0006468; protein phosphorylation; biological_process	GO:0006355; regulation of transcription, DNA-dependent; biological_process	GO:0004672; protein kinase activity; molecular_function	GO:0005515; protein binding; molecular_function	GO:0005524; ATP binding; molecular_function
transcript_HQ_HBZL_transcript10796/f2p0/1972	2	GO:0016020; membrane; cellular_component	GO:0016021; integral to membrane; cellular_component
transcript_HQ_HBZL_transcript10797/f24p0/1947	1	GO:0005515; protein binding; molecular_function
transcript_HQ_HBZL_transcript10801/f4p0/1973	6	GO:0005634; nucleus; cellular_component	GO:0003700; sequence-specific DNA binding transcription factor activity; molecular_function	GO:0070206; protein trimerization; biological_process	GO:0006355; regulation of transcription, DNA-dependent; biological_process	GO:0006914; autophagy; biological_process	GO:0043565; sequence-specific DNA binding; molecular_function
transcript_HQ_HBZL_transcript10802/f3p0/1966	2	GO:0008152; NA	GO:0016758; transferase activity, transferring hexosyl groups; molecular_function
transcript_HQ_HBZL_transcript10803/f3p0/2020	1	GO:0008152; NA
transcript_HQ_HBZL_transcript10808/f6p0/1974	3	GO:0016052; carbohydrate catabolic process; biological_process	GO:0030246; carbohydrate binding; molecular_function	GO:0004553; hydrolase activity, hydrolyzing O-glycosyl compounds; molecular_function
transcript_HQ_HBZL_transcript10810/f14p0/1987	2	GO:0003824; NA	GO:0008152; NA
transcript_HQ_HBZL_transcript10812/f3p0/1998	2	GO:0016491; oxidoreductase activity; molecular_function	GO:0055114; oxidation-reduction process; biological_process
transcript_HQ_HBZL_transcript10813/f2p0/2001	2	GO:0005515; protein binding; molecular_function	GO:0008289; lipid binding; molecular_function
transcript_HQ_HBZL_transcript10814/f4p0/1972	2	GO:0016773; phosphotransferase activity, alcohol group as acceptor; molecular_function	GO:0005975; carbohydrate metabolic process; biological_process
transcript_HQ_HBZL_transcript10816/f2p0/1979	5	GO:0004672; protein kinase activity; molecular_function	GO:0006468; protein phosphorylation; biological_process	GO:0016773; phosphotransferase activity, alcohol group as acceptor; molecular_function	GO:0005524; ATP binding; molecular_function	GO:0016020; membrane; cellular_component
transcript_HQ_HBZL_transcript10818/f6p0/1980	2	GO:0070569; uridylyltransferase activity; molecular_function	GO:0008152; NA
transcript_HQ_HBZL_transcript10819/f15p0/1971	1	GO:0046872; metal ion binding; molecular_function
transcript_HQ_HBZL_transcript10820/f3p0/1964	5	GO:0004315; 3-oxoacyl-[acyl-carrier-protein] synthase activity; molecular_function	GO:0016020; membrane; cellular_component	GO:0006633; fatty acid biosynthetic process; biological_process	GO:0005267; potassium channel activity; molecular_function	GO:0016747; transferase activity, transferring acyl groups other than amino-acyl groups; molecular_function
transcript_HQ_HBZL_transcript10821/f5p0/1998	4	GO:0016705; oxidoreductase activity, acting on paired donors, with incorporation or reduction of molecular oxygen; molecular_function	GO:0055114; oxidation-reduction process; biological_process	GO:0020037; heme binding; molecular_function	GO:0005506; iron ion binding; molecular_function
transcript_HQ_HBZL_transcript10823/f4p0/2019	3	GO:0046872; metal ion binding; molecular_function	GO:0008270; zinc ion binding; molecular_function	GO:0005515; protein binding; molecular_function
transcript_HQ_HBZL_transcript10825/f3p0/1989	2	GO:0055085; transmembrane transport; biological_process	GO:0016021; integral to membrane; cellular_component
transcript_HQ_HBZL_transcript10828/f3p0/1977	4	GO:0016705; oxidoreductase activity, acting on paired donors, with incorporation or reduction of molecular oxygen; molecular_function	GO:0055114; oxidation-reduction process; biological_process	GO:0005506; iron ion binding; molecular_function	GO:0020037; heme binding; molecular_function
transcript_HQ_HBZL_transcript10829/f11p0/1975	2	GO:0003824; NA	GO:0005515; protein binding; molecular_function
transcript_HQ_HBZL_transcript1083/f8p0/3751	1	GO:0005515; protein binding; molecular_function
transcript_HQ_HBZL_transcript10830/f2p0/1973	2	GO:0008152; NA	GO:0003824; NA
transcript_HQ_HBZL_transcript1084/f2p0/3777	5	GO:0034450; ubiquitin-ubiquitin ligase activity; molecular_function	GO:0016567; protein ubiquitination; biological_process	GO:0004842; ubiquitin-protein ligase activity; molecular_function	GO:0006511; ubiquitin-dependent protein catabolic process; biological_process	GO:0000151; ubiquitin ligase complex; cellular_component
transcript_HQ_HBZL_transcript10841/f4p0/1962	1	GO:0016226; iron-sulfur cluster assembly; biological_process
transcript_HQ_HBZL_transcript10843/f2p0/2016	5	GO:0006468; protein phosphorylation; biological_process	GO:0016773; phosphotransferase activity, alcohol group as acceptor; molecular_function	GO:0004672; protein kinase activity; molecular_function	GO:0016020; membrane; cellular_component	GO:0005524; ATP binding; molecular_function
transcript_HQ_HBZL_transcript10844/f5p0/1501	2	GO:0008375; acetylglucosaminyltransferase activity; molecular_function	GO:0016020; membrane; cellular_component
transcript_HQ_HBZL_transcript10846/f4p0/1971	1	GO:0016779; nucleotidyltransferase activity; molecular_function
transcript_HQ_HBZL_transcript10847/f2p0/1961	2	GO:0006508; proteolysis; biological_process	GO:0004185; serine-type carboxypeptidase activity; molecular_function
transcript_HQ_HBZL_transcript10849/f2p0/1982	2	GO:0051082; unfolded protein binding; molecular_function	GO:0031072; heat shock protein binding; molecular_function
transcript_HQ_HBZL_transcript1085/f3p0/3615	5	GO:0009424; bacterial-type flagellum hook; cellular_component	GO:0006355; regulation of transcription, DNA-dependent; biological_process	GO:0003700; sequence-specific DNA binding transcription factor activity; molecular_function	GO:0005525; GTP binding; molecular_function	GO:0003924; GTPase activity; molecular_function
transcript_HQ_HBZL_transcript10850/f4p0/1971	1	GO:0005515; protein binding; molecular_function
transcript_HQ_HBZL_transcript10854/f2p0/1991	7	GO:0032957; inositol trisphosphate metabolic process; biological_process	GO:0000287; magnesium ion binding; molecular_function	GO:0005622; intracellular; cellular_component	GO:0047325; inositol tetrakisphosphate 1-kinase activity; molecular_function	GO:0005524; ATP binding; molecular_function	GO:0052726; NA	GO:0052725; NA
transcript_HQ_HBZL_transcript10857/f2p0/1972	2	GO:0008686; 3,4-dihydroxy-2-butanone-4-phosphate synthase activity; molecular_function	GO:0009231; riboflavin biosynthetic process; biological_process
transcript_HQ_HBZL_transcript10859/f2p0/2031	5	GO:0016020; membrane; cellular_component	GO:0016021; integral to membrane; cellular_component	GO:0055085; transmembrane transport; biological_process	GO:0006814; sodium ion transport; biological_process	GO:0005215; NA
transcript_HQ_HBZL_transcript10860/f13p0/1977	1	GO:0005515; protein binding; molecular_function
transcript_HQ_HBZL_transcript10861/f3p0/1993	2	GO:0008152; NA	GO:0003824; NA
transcript_HQ_HBZL_transcript10864/f2p0/1946	6	GO:0005524; ATP binding; molecular_function	GO:0004852; uroporphyrinogen-III synthase activity; molecular_function	GO:0033014; tetrapyrrole biosynthetic process; biological_process	GO:0016787; hydrolase activity; molecular_function	GO:0003677; DNA binding; molecular_function	GO:0003676; nucleic acid binding; molecular_function
transcript_HQ_HBZL_transcript10865/f2p0/1948	4	GO:0004222; metalloendopeptidase activity; molecular_function	GO:0045893; positive regulation of transcription, DNA-dependent; biological_process	GO:0005634; nucleus; cellular_component	GO:0006508; proteolysis; biological_process
transcript_HQ_HBZL_transcript10867/f3p0/1978	2	GO:0005975; carbohydrate metabolic process; biological_process	GO:0004553; hydrolase activity, hydrolyzing O-glycosyl compounds; molecular_function
transcript_HQ_HBZL_transcript10868/f2p0/1975	1	GO:0046912; transferase activity, transferring acyl groups, acyl groups converted into alkyl on transfer; molecular_function
transcript_HQ_HBZL_transcript10869/f3p0/1972	3	GO:0016773; phosphotransferase activity, alcohol group as acceptor; molecular_function	GO:0005524; ATP binding; molecular_function	GO:0005975; carbohydrate metabolic process; biological_process
transcript_HQ_HBZL_transcript1087/f2p0/3724	4	GO:0004672; protein kinase activity; molecular_function	GO:0006468; protein phosphorylation; biological_process	GO:0005524; ATP binding; molecular_function	GO:0005515; protein binding; molecular_function
transcript_HQ_HBZL_transcript10870/f2p0/1983	4	GO:0005506; iron ion binding; molecular_function	GO:0020037; heme binding; molecular_function	GO:0016705; oxidoreductase activity, acting on paired donors, with incorporation or reduction of molecular oxygen; molecular_function	GO:0055114; oxidation-reduction process; biological_process
transcript_HQ_HBZL_transcript10872/f2p0/1969	2	GO:0003677; DNA binding; molecular_function	GO:0006355; regulation of transcription, DNA-dependent; biological_process
transcript_HQ_HBZL_transcript10875/f18p0/1915	2	GO:0055114; oxidation-reduction process; biological_process	GO:0016491; oxidoreductase activity; molecular_function
transcript_HQ_HBZL_transcript10877/f2p0/1993	2	GO:0006914; autophagy; biological_process	GO:0008641; small protein activating enzyme activity; molecular_function
transcript_HQ_HBZL_transcript10878/f4p0/1930	2	GO:0008270; zinc ion binding; molecular_function	GO:0005515; protein binding; molecular_function
transcript_HQ_HBZL_transcript10879/f3p0/1966	3	GO:0005524; ATP binding; molecular_function	GO:0006468; protein phosphorylation; biological_process	GO:0004672; protein kinase activity; molecular_function
transcript_HQ_HBZL_transcript10882/f10p0/1966	1	GO:0016757; transferase activity, transferring glycosyl groups; molecular_function
transcript_HQ_HBZL_transcript10883/f2p0/1999	1	GO:0046872; metal ion binding; molecular_function
transcript_HQ_HBZL_transcript10887/f2p0/1971	4	GO:0009236; cobalamin biosynthetic process; biological_process	GO:0006783; heme biosynthetic process; biological_process	GO:0004325; ferrochelatase activity; molecular_function	GO:0016852; sirohydrochlorin cobaltochelatase activity; molecular_function
transcript_HQ_HBZL_transcript10888/f2p0/1982	2	GO:0006508; proteolysis; biological_process	GO:0004185; serine-type carboxypeptidase activity; molecular_function
transcript_HQ_HBZL_transcript10892/f2p0/1973	4	GO:0055114; oxidation-reduction process; biological_process	GO:0016705; oxidoreductase activity, acting on paired donors, with incorporation or reduction of molecular oxygen; molecular_function	GO:0020037; heme binding; molecular_function	GO:0005506; iron ion binding; molecular_function
transcript_HQ_HBZL_transcript10893/f2p0/1979	4	GO:0055114; oxidation-reduction process; biological_process	GO:0005515; protein binding; molecular_function	GO:0005507; copper ion binding; molecular_function	GO:0016491; oxidoreductase activity; molecular_function
transcript_HQ_HBZL_transcript10896/f3p0/2015	5	GO:0004418; hydroxymethylbilane synthase activity; molecular_function	GO:0005975; carbohydrate metabolic process; biological_process	GO:0005524; ATP binding; molecular_function	GO:0016773; phosphotransferase activity, alcohol group as acceptor; molecular_function	GO:0033014; tetrapyrrole biosynthetic process; biological_process
transcript_HQ_HBZL_transcript10900/f2p0/1977	4	GO:0016747; transferase activity, transferring acyl groups other than amino-acyl groups; molecular_function	GO:0004315; 3-oxoacyl-[acyl-carrier-protein] synthase activity; molecular_function	GO:0006633; fatty acid biosynthetic process; biological_process	GO:0016020; membrane; cellular_component
transcript_HQ_HBZL_transcript10906/f2p0/2034	2	GO:0005991; trehalose metabolic process; biological_process	GO:0004555; alpha,alpha-trehalase activity; molecular_function
transcript_HQ_HBZL_transcript10907/f4p0/1968	1	GO:0006950; response to stress; biological_process
transcript_HQ_HBZL_transcript10909/f2p0/1966	5	GO:0016021; integral to membrane; cellular_component	GO:0016020; membrane; cellular_component	GO:0005215; NA	GO:0055085; transmembrane transport; biological_process	GO:0006814; sodium ion transport; biological_process
transcript_HQ_HBZL_transcript10912/f8p0/1964	1	GO:0016788; hydrolase activity, acting on ester bonds; molecular_function
transcript_HQ_HBZL_transcript10920/f3p0/1975	2	GO:0016491; oxidoreductase activity; molecular_function	GO:0055114; oxidation-reduction process; biological_process
transcript_HQ_HBZL_transcript10921/f4p0/1985	1	GO:0005524; ATP binding; molecular_function
transcript_HQ_HBZL_transcript10925/f8p0/1970	5	GO:0006096; glycolysis; biological_process	GO:0000287; magnesium ion binding; molecular_function	GO:0003824; NA	GO:0004743; pyruvate kinase activity; molecular_function	GO:0030955; potassium ion binding; molecular_function
transcript_HQ_HBZL_transcript10926/f8p0/1971	5	GO:0004842; ubiquitin-protein ligase activity; molecular_function	GO:0005680; anaphase-promoting complex; cellular_component	GO:0046872; metal ion binding; molecular_function	GO:0008270; zinc ion binding; molecular_function	GO:0005515; protein binding; molecular_function
transcript_HQ_HBZL_transcript10928/f2p0/2030	3	GO:0036459; NA	GO:0016579; protein deubiquitination; biological_process	GO:0005515; protein binding; molecular_function
transcript_HQ_HBZL_transcript10932/f4p0/1953	1	GO:0030246; carbohydrate binding; molecular_function
transcript_HQ_HBZL_transcript10933/f7p0/1947	4	GO:0005515; protein binding; molecular_function	GO:0005669; transcription factor TFIID complex; cellular_component	GO:0006352; transcription initiation, DNA-dependent; biological_process	GO:0006270; DNA-dependent DNA replication initiation; biological_process
transcript_HQ_HBZL_transcript10936/f2p0/1962	4	GO:0016829; lyase activity; molecular_function	GO:0000287; magnesium ion binding; molecular_function	GO:0008152; NA	GO:0010333; terpene synthase activity; molecular_function
transcript_HQ_HBZL_transcript10937/f4p0/1981	1	GO:0003676; nucleic acid binding; molecular_function
transcript_HQ_HBZL_transcript10940/f2p0/1941	4	GO:0016705; oxidoreductase activity, acting on paired donors, with incorporation or reduction of molecular oxygen; molecular_function	GO:0055114; oxidation-reduction process; biological_process	GO:0020037; heme binding; molecular_function	GO:0005506; iron ion binding; molecular_function
transcript_HQ_HBZL_transcript10941/f2p0/1968	3	GO:0043565; sequence-specific DNA binding; molecular_function	GO:0006355; regulation of transcription, DNA-dependent; biological_process	GO:0003700; sequence-specific DNA binding transcription factor activity; molecular_function
transcript_HQ_HBZL_transcript10945/f2p0/1965	1	GO:0016763; transferase activity, transferring pentosyl groups; molecular_function
transcript_HQ_HBZL_transcript10947/f2p0/1972	1	GO:0006397; mRNA processing; biological_process
transcript_HQ_HBZL_transcript10948/f2p0/1972	2	GO:0003824; NA	GO:0008152; NA
transcript_HQ_HBZL_transcript10949/f2p0/2043	6	GO:0016491; oxidoreductase activity; molecular_function	GO:0045454; cell redox homeostasis; biological_process	GO:0009055; NA	GO:0016209; NA	GO:0055114; oxidation-reduction process; biological_process	GO:0015035; protein disulfide oxidoreductase activity; molecular_function
transcript_HQ_HBZL_transcript1095/f2p0/3682	3	GO:0016787; hydrolase activity; molecular_function	GO:0006629; lipid metabolic process; biological_process	GO:0008374; O-acyltransferase activity; molecular_function
transcript_HQ_HBZL_transcript10954/f3p0/1975	5	GO:0004672; protein kinase activity; molecular_function	GO:0006468; protein phosphorylation; biological_process	GO:0016773; phosphotransferase activity, alcohol group as acceptor; molecular_function	GO:0005524; ATP binding; molecular_function	GO:0016020; membrane; cellular_component
transcript_HQ_HBZL_transcript1096/f3p0/3709	6	GO:0005524; ATP binding; molecular_function	GO:0000786; nucleosome; cellular_component	GO:0007283; spermatogenesis; biological_process	GO:0005634; nucleus; cellular_component	GO:0003677; DNA binding; molecular_function	GO:0003676; nucleic acid binding; molecular_function
transcript_HQ_HBZL_transcript10962/f4p0/1987	4	GO:0005506; iron ion binding; molecular_function	GO:0020037; heme binding; molecular_function	GO:0016705; oxidoreductase activity, acting on paired donors, with incorporation or reduction of molecular oxygen; molecular_function	GO:0055114; oxidation-reduction process; biological_process
transcript_HQ_HBZL_transcript10964/f2p0/1989	4	GO:0016705; oxidoreductase activity, acting on paired donors, with incorporation or reduction of molecular oxygen; molecular_function	GO:0055114; oxidation-reduction process; biological_process	GO:0020037; heme binding; molecular_function	GO:0005506; iron ion binding; molecular_function
transcript_HQ_HBZL_transcript10970/f2p0/1963	1	GO:0019867; outer membrane; cellular_component
transcript_HQ_HBZL_transcript10972/f3p0/1967	9	GO:0004743; pyruvate kinase activity; molecular_function	GO:0051287; NAD binding; molecular_function	GO:0009231; riboflavin biosynthetic process; biological_process	GO:0030955; potassium ion binding; molecular_function	GO:0016616; oxidoreductase activity, acting on the CH-OH group of donors, NAD or NADP as acceptor; molecular_function	GO:0000287; magnesium ion binding; molecular_function	GO:0008703; 5-amino-6-(5-phosphoribosylamino)uracil reductase activity; molecular_function	GO:0006096; glycolysis; biological_process	GO:0055114; oxidation-reduction process; biological_process
transcript_HQ_HBZL_transcript10975/f2p0/1962	3	GO:0016491; oxidoreductase activity; molecular_function	GO:0055114; oxidation-reduction process; biological_process	GO:0008152; NA
transcript_HQ_HBZL_transcript10978/f7p0/1971	1	GO:0005515; protein binding; molecular_function
transcript_HQ_HBZL_transcript10979/f2p0/1954	1	GO:0005515; protein binding; molecular_function
transcript_HQ_HBZL_transcript1098/f2p0/3719	1	GO:0003676; nucleic acid binding; molecular_function
transcript_HQ_HBZL_transcript10980/f2p0/1965	2	GO:0003779; actin binding; molecular_function	GO:0005515; protein binding; molecular_function
transcript_HQ_HBZL_transcript10982/f4p0/1962	6	GO:0004672; protein kinase activity; molecular_function	GO:0006468; protein phosphorylation; biological_process	GO:0007165; signal transduction; biological_process	GO:0016773; phosphotransferase activity, alcohol group as acceptor; molecular_function	GO:0005524; ATP binding; molecular_function	GO:0016020; membrane; cellular_component
transcript_HQ_HBZL_transcript10984/f3p0/1893	1	GO:0003824; NA
transcript_HQ_HBZL_transcript10985/f24p0/1952	4	GO:0016787; hydrolase activity; molecular_function	GO:0047746; chlorophyllase activity; molecular_function	GO:0008152; NA	GO:0015996; chlorophyll catabolic process; biological_process
transcript_HQ_HBZL_transcript10987/f2p0/1975	5	GO:0004672; protein kinase activity; molecular_function	GO:0016773; phosphotransferase activity, alcohol group as acceptor; molecular_function	GO:0006468; protein phosphorylation; biological_process	GO:0005524; ATP binding; molecular_function	GO:0016020; membrane; cellular_component
transcript_HQ_HBZL_transcript10989/f2p0/1955	1	GO:0005515; protein binding; molecular_function
transcript_HQ_HBZL_transcript1099/f3p0/3769	4	GO:0003676; nucleic acid binding; molecular_function	GO:0006414; translational elongation; biological_process	GO:0005622; intracellular; cellular_component	GO:0003746; translation elongation factor activity; molecular_function
transcript_HQ_HBZL_transcript10991/f2p0/1964	3	GO:0016021; integral to membrane; cellular_component	GO:0022857; transmembrane transporter activity; molecular_function	GO:0055085; transmembrane transport; biological_process
transcript_HQ_HBZL_transcript10994/f2p0/1966	4	GO:0005515; protein binding; molecular_function	GO:0005524; ATP binding; molecular_function	GO:0006468; protein phosphorylation; biological_process	GO:0004672; protein kinase activity; molecular_function
transcript_HQ_HBZL_transcript10998/f12p0/1946	3	GO:0004512; inositol-3-phosphate synthase activity; molecular_function	GO:0006021; inositol biosynthetic process; biological_process	GO:0008654; phospholipid biosynthetic process; biological_process
transcript_HQ_HBZL_transcript11/f2p0/7653	3	GO:0001104; RNA polymerase II transcription cofactor activity; molecular_function	GO:0016592; mediator complex; cellular_component	GO:0006357; regulation of transcription from RNA polymerase II promoter; biological_process
transcript_HQ_HBZL_transcript110/f2p0/5903	11	GO:0006308; DNA catabolic process; biological_process	GO:0035556; intracellular signal transduction; biological_process	GO:0003677; DNA binding; molecular_function	GO:0004842; ubiquitin-protein ligase activity; molecular_function	GO:0008270; zinc ion binding; molecular_function	GO:0005515; protein binding; molecular_function	GO:0008855; exodeoxyribonuclease VII activity; molecular_function	GO:0005680; anaphase-promoting complex; cellular_component	GO:0009318; exodeoxyribonuclease VII complex; cellular_component	GO:0016706; oxidoreductase activity, acting on paired donors, with incorporation or reduction of molecular oxygen, 2-oxoglutarate as one donor, and incorporation of one atom each of oxygen into both donors; molecular_function	GO:0055114; oxidation-reduction process; biological_process
transcript_HQ_HBZL_transcript1100/f2p0/3699	3	GO:0005515; protein binding; molecular_function	GO:0016567; protein ubiquitination; biological_process	GO:0004842; ubiquitin-protein ligase activity; molecular_function
transcript_HQ_HBZL_transcript11000/f3p0/1956	4	GO:0004857; enzyme inhibitor activity; molecular_function	GO:0042545; cell wall modification; biological_process	GO:0030599; pectinesterase activity; molecular_function	GO:0005618; cell wall; cellular_component
transcript_HQ_HBZL_transcript11002/f2p0/1978	1	GO:0005515; protein binding; molecular_function
transcript_HQ_HBZL_transcript11003/f2p0/1992	6	GO:0006508; proteolysis; biological_process	GO:0055085; transmembrane transport; biological_process	GO:0030436; asexual sporulation; biological_process	GO:0004190; aspartic-type endopeptidase activity; molecular_function	GO:0016020; membrane; cellular_component	GO:0016021; integral to membrane; cellular_component
transcript_HQ_HBZL_transcript11004/f3p0/1957	3	GO:0004672; protein kinase activity; molecular_function	GO:0006468; protein phosphorylation; biological_process	GO:0005524; ATP binding; molecular_function
transcript_HQ_HBZL_transcript11007/f4p0/1941	3	GO:0016020; membrane; cellular_component	GO:0008519; ammonium transmembrane transporter activity; molecular_function	GO:0015696; ammonium transport; biological_process
transcript_HQ_HBZL_transcript11011/f5p0/1956	2	GO:0030570; pectate lyase activity; molecular_function	GO:0016773; phosphotransferase activity, alcohol group as acceptor; molecular_function
transcript_HQ_HBZL_transcript11012/f13p0/1949	3	GO:0007186; G-protein coupled receptor protein signaling pathway; biological_process	GO:0016021; integral to membrane; cellular_component	GO:0019236; response to pheromone; biological_process
transcript_HQ_HBZL_transcript11017/f2p0/1982	2	GO:0006355; regulation of transcription, DNA-dependent; biological_process	GO:0003700; sequence-specific DNA binding transcription factor activity; molecular_function
transcript_HQ_HBZL_transcript11018/f2p0/1950	1	GO:0005515; protein binding; molecular_function
transcript_HQ_HBZL_transcript11021/f6p0/1880	1	GO:0008168; methyltransferase activity; molecular_function
transcript_HQ_HBZL_transcript11022/f22p0/1949	6	GO:0006270; DNA-dependent DNA replication initiation; biological_process	GO:0046872; metal ion binding; molecular_function	GO:0004672; protein kinase activity; molecular_function	GO:0006468; protein phosphorylation; biological_process	GO:0005524; ATP binding; molecular_function	GO:0030001; metal ion transport; biological_process
transcript_HQ_HBZL_transcript11023/f3p0/1958	4	GO:0016149; translation release factor activity, codon specific; molecular_function	GO:0005737; cytoplasm; cellular_component	GO:0003747; translation release factor activity; molecular_function	GO:0006415; translational termination; biological_process
transcript_HQ_HBZL_transcript11027/f5p0/1981	2	GO:0009247; glycolipid biosynthetic process; biological_process	GO:0016758; transferase activity, transferring hexosyl groups; molecular_function
transcript_HQ_HBZL_transcript11029/f2p0/1948	1	GO:0006396; RNA processing; biological_process
transcript_HQ_HBZL_transcript11033/f14p0/1949	8	GO:0005524; ATP binding; molecular_function	GO:0055114; oxidation-reduction process; biological_process	GO:0003910; DNA ligase (ATP) activity; molecular_function	GO:0006281; DNA repair; biological_process	GO:0020037; heme binding; molecular_function	GO:0016705; oxidoreductase activity, acting on paired donors, with incorporation or reduction of molecular oxygen; molecular_function	GO:0006310; DNA recombination; biological_process	GO:0005506; iron ion binding; molecular_function
transcript_HQ_HBZL_transcript11034/f2p0/1943	3	GO:0005524; ATP binding; molecular_function	GO:0004672; protein kinase activity; molecular_function	GO:0006468; protein phosphorylation; biological_process
transcript_HQ_HBZL_transcript11038/f4p0/1948	3	GO:0016491; oxidoreductase activity; molecular_function	GO:0008152; NA	GO:0055114; oxidation-reduction process; biological_process
transcript_HQ_HBZL_transcript11040/f8p0/1965	2	GO:0016485; protein processing; biological_process	GO:0016021; integral to membrane; cellular_component
transcript_HQ_HBZL_transcript11042/f2p0/1967	3	GO:0005515; protein binding; molecular_function	GO:0019901; protein kinase binding; molecular_function	GO:0051087; chaperone binding; molecular_function
transcript_HQ_HBZL_transcript11044/f6p0/1976	3	GO:0005524; ATP binding; molecular_function	GO:0006468; protein phosphorylation; biological_process	GO:0004672; protein kinase activity; molecular_function
transcript_HQ_HBZL_transcript11047/f2p0/1970	1	GO:0005515; protein binding; molecular_function
transcript_HQ_HBZL_transcript1105/f2p0/3674	2	GO:0055114; oxidation-reduction process; biological_process	GO:0016491; oxidoreductase activity; molecular_function
transcript_HQ_HBZL_transcript11052/f2p0/1959	3	GO:0008168; methyltransferase activity; molecular_function	GO:0008152; NA	GO:0006412; translation; biological_process
transcript_HQ_HBZL_transcript11054/f2p0/1965	9	GO:0051258; protein polymerization; biological_process	GO:0006810; transport; biological_process	GO:0005102; receptor binding; molecular_function	GO:0044877; NA	GO:0005886; plasma membrane; cellular_component	GO:0007165; signal transduction; biological_process	GO:0030674; protein binding, bridging; molecular_function	GO:0030168; platelet activation; biological_process	GO:0005577; fibrinogen complex; cellular_component
transcript_HQ_HBZL_transcript1106/f6p0/3700	2	GO:0005515; protein binding; molecular_function	GO:0016020; membrane; cellular_component
transcript_HQ_HBZL_transcript11061/f3p0/1965	3	GO:0006520; cellular amino acid metabolic process; biological_process	GO:0016829; lyase activity; molecular_function	GO:0016740; transferase activity; molecular_function
transcript_HQ_HBZL_transcript11062/f2p0/2059	1	GO:0003676; nucleic acid binding; molecular_function
transcript_HQ_HBZL_transcript11064/f4p0/1968	4	GO:0020037; heme binding; molecular_function	GO:0005506; iron ion binding; molecular_function	GO:0016705; oxidoreductase activity, acting on paired donors, with incorporation or reduction of molecular oxygen; molecular_function	GO:0055114; oxidation-reduction process; biological_process
transcript_HQ_HBZL_transcript11065/f2p0/1952	1	GO:0003682; chromatin binding; molecular_function
transcript_HQ_HBZL_transcript11066/f2p0/1938	12	GO:0055085; transmembrane transport; biological_process	GO:0046873; metal ion transmembrane transporter activity; molecular_function	GO:0005882; intermediate filament; cellular_component	GO:0042157; lipoprotein metabolic process; biological_process	GO:0005198; NA	GO:0008289; lipid binding; molecular_function	GO:0019031; viral envelope; cellular_component	GO:0006869; lipid transport; biological_process	GO:0016020; membrane; cellular_component	GO:0005576; NA	GO:0019028; viral capsid; cellular_component	GO:0030001; metal ion transport; biological_process
transcript_HQ_HBZL_transcript1107/f2p0/3678	1	GO:0003824; NA
transcript_HQ_HBZL_transcript11070/f2p0/1958	4	GO:0020037; heme binding; molecular_function	GO:0005506; iron ion binding; molecular_function	GO:0016705; oxidoreductase activity, acting on paired donors, with incorporation or reduction of molecular oxygen; molecular_function	GO:0055114; oxidation-reduction process; biological_process
transcript_HQ_HBZL_transcript11071/f12p0/1959	2	GO:0016747; transferase activity, transferring acyl groups other than amino-acyl groups; molecular_function	GO:0008152; NA
transcript_HQ_HBZL_transcript11072/f3p0/1986	2	GO:0004650; polygalacturonase activity; molecular_function	GO:0005975; carbohydrate metabolic process; biological_process
transcript_HQ_HBZL_transcript11077/f3p0/1875	4	GO:0015630; microtubule cytoskeleton; cellular_component	GO:0008855; exodeoxyribonuclease VII activity; molecular_function	GO:0046872; metal ion binding; molecular_function	GO:0000226; microtubule cytoskeleton organization; biological_process
transcript_HQ_HBZL_transcript11081/f9p0/1964	2	GO:0006355; regulation of transcription, DNA-dependent; biological_process	GO:0003700; sequence-specific DNA binding transcription factor activity; molecular_function
transcript_HQ_HBZL_transcript11085/f12p0/1952	11	GO:0006355; regulation of transcription, DNA-dependent; biological_process	GO:0006281; DNA repair; biological_process	GO:0003724; RNA helicase activity; molecular_function	GO:0009378; four-way junction helicase activity; molecular_function	GO:0016887; ATPase activity; molecular_function	GO:0003678; DNA helicase activity; molecular_function	GO:0005524; ATP binding; molecular_function	GO:0003723; RNA binding; molecular_function	GO:0006310; DNA recombination; biological_process	GO:0019079; viral genome replication; biological_process	GO:0008134; transcription factor binding; molecular_function
transcript_HQ_HBZL_transcript11088/f2p0/1960	2	GO:0006952; defense response; biological_process	GO:0016021; integral to membrane; cellular_component
transcript_HQ_HBZL_transcript11089/f4p0/1980	1	GO:0005515; protein binding; molecular_function
transcript_HQ_HBZL_transcript1109/f5p0/3709	3	GO:0005516; calmodulin binding; molecular_function	GO:0000166; nucleotide binding; molecular_function	GO:0046872; metal ion binding; molecular_function
transcript_HQ_HBZL_transcript11092/f2p0/1951	2	GO:0005515; protein binding; molecular_function	GO:0008270; zinc ion binding; molecular_function
transcript_HQ_HBZL_transcript1110/f3p0/3831	1	GO:0005515; protein binding; molecular_function
transcript_HQ_HBZL_transcript11101/f2p0/1948	2	GO:0005975; carbohydrate metabolic process; biological_process	GO:0004553; hydrolase activity, hydrolyzing O-glycosyl compounds; molecular_function
transcript_HQ_HBZL_transcript11102/f3p0/2012	3	GO:0008417; fucosyltransferase activity; molecular_function	GO:0006486; protein glycosylation; biological_process	GO:0016020; membrane; cellular_component
transcript_HQ_HBZL_transcript11104/f2p0/1952	1	GO:0016787; hydrolase activity; molecular_function
transcript_HQ_HBZL_transcript11105/f2p0/1950	4	GO:0008152; NA	GO:0010333; terpene synthase activity; molecular_function	GO:0016829; lyase activity; molecular_function	GO:0000287; magnesium ion binding; molecular_function
transcript_HQ_HBZL_transcript11106/f3p0/1980	5	GO:0016773; phosphotransferase activity, alcohol group as acceptor; molecular_function	GO:0006468; protein phosphorylation; biological_process	GO:0004672; protein kinase activity; molecular_function	GO:0016020; membrane; cellular_component	GO:0005524; ATP binding; molecular_function
transcript_HQ_HBZL_transcript1111/f3p0/3701	5	GO:0004842; ubiquitin-protein ligase activity; molecular_function	GO:0000151; ubiquitin ligase complex; cellular_component	GO:0006511; ubiquitin-dependent protein catabolic process; biological_process	GO:0034450; ubiquitin-ubiquitin ligase activity; molecular_function	GO:0016567; protein ubiquitination; biological_process
transcript_HQ_HBZL_transcript11110/f4p0/1886	7	GO:0000775; chromosome, centromeric region; cellular_component	GO:0005737; cytoplasm; cellular_component	GO:0006397; mRNA processing; biological_process	GO:0003677; DNA binding; molecular_function	GO:0005634; nucleus; cellular_component	GO:0003682; chromatin binding; molecular_function	GO:0003723; RNA binding; molecular_function
transcript_HQ_HBZL_transcript11111/f3p0/1948	2	GO:0005515; protein binding; molecular_function	GO:0005516; calmodulin binding; molecular_function
transcript_HQ_HBZL_transcript11112/f3p0/1960	2	GO:0005515; protein binding; molecular_function	GO:0008270; zinc ion binding; molecular_function
transcript_HQ_HBZL_transcript11113/f22p0/1903	8	GO:0015035; protein disulfide oxidoreductase activity; molecular_function	GO:0055114; oxidation-reduction process; biological_process	GO:0009306; protein secretion; biological_process	GO:0005788; endoplasmic reticulum lumen; cellular_component	GO:0009055; NA	GO:0016491; oxidoreductase activity; molecular_function	GO:0045454; cell redox homeostasis; biological_process	GO:0016209; NA
transcript_HQ_HBZL_transcript11114/f2p0/1937	2	GO:0016021; integral to membrane; cellular_component	GO:0055085; transmembrane transport; biological_process
transcript_HQ_HBZL_transcript11118/f2p0/1954	1	GO:0016757; transferase activity, transferring glycosyl groups; molecular_function
transcript_HQ_HBZL_transcript11119/f13p0/1944	1	GO:0005515; protein binding; molecular_function
transcript_HQ_HBZL_transcript1112/f3p0/3683	4	GO:0030117; membrane coat; cellular_component	GO:0006886; intracellular protein transport; biological_process	GO:0005515; protein binding; molecular_function	GO:0016192; vesicle-mediated transport; biological_process
transcript_HQ_HBZL_transcript11120/f3p0/1959	3	GO:0055114; oxidation-reduction process; biological_process	GO:0005524; ATP binding; molecular_function	GO:0016491; oxidoreductase activity; molecular_function
transcript_HQ_HBZL_transcript11123/f3p0/1946	1	GO:0005515; protein binding; molecular_function
transcript_HQ_HBZL_transcript11125/f3p0/1946	3	GO:0007155; cell adhesion; biological_process	GO:0006556; S-adenosylmethionine biosynthetic process; biological_process	GO:0004478; methionine adenosyltransferase activity; molecular_function
transcript_HQ_HBZL_transcript11127/f2p0/1962	2	GO:0003333; amino acid transmembrane transport; biological_process	GO:0016021; integral to membrane; cellular_component
transcript_HQ_HBZL_transcript11128/f2p0/1972	2	GO:0016874; ligase activity; molecular_function	GO:0016884; carbon-nitrogen ligase activity, with glutamine as amido-N-donor; molecular_function
transcript_HQ_HBZL_transcript1113/f4p0/3673	5	GO:0005524; ATP binding; molecular_function	GO:0016818; hydrolase activity, acting on acid anhydrides, in phosphorus-containing anhydrides; molecular_function	GO:0005634; nucleus; cellular_component	GO:0003676; nucleic acid binding; molecular_function	GO:0006338; chromatin remodeling; biological_process
transcript_HQ_HBZL_transcript11133/f3p0/1944	3	GO:0006355; regulation of transcription, DNA-dependent; biological_process	GO:0003700; sequence-specific DNA binding transcription factor activity; molecular_function	GO:0043565; sequence-specific DNA binding; molecular_function
transcript_HQ_HBZL_transcript11135/f4p0/1994	2	GO:0008152; NA	GO:0003824; NA
transcript_HQ_HBZL_transcript11136/f2p0/1965	4	GO:0005783; endoplasmic reticulum; cellular_component	GO:0055114; oxidation-reduction process; biological_process	GO:0016671; oxidoreductase activity, acting on a sulfur group of donors, disulfide as acceptor; molecular_function	GO:0003756; protein disulfide isomerase activity; molecular_function
transcript_HQ_HBZL_transcript11137/f4p0/1964	3	GO:0005576; NA	GO:0031640; killing of cells of other organism; biological_process	GO:0008233; peptidase activity; molecular_function
transcript_HQ_HBZL_transcript11138/f27p0/1938	3	GO:0005524; ATP binding; molecular_function	GO:0006468; protein phosphorylation; biological_process	GO:0004672; protein kinase activity; molecular_function
transcript_HQ_HBZL_transcript11139/f10p0/1957	2	GO:0008152; NA	GO:0016746; transferase activity, transferring acyl groups; molecular_function
transcript_HQ_HBZL_transcript1114/f9p0/3708	2	GO:0003676; nucleic acid binding; molecular_function	GO:0005515; protein binding; molecular_function
transcript_HQ_HBZL_transcript11141/f2p0/1955	3	GO:0006355; regulation of transcription, DNA-dependent; biological_process	GO:0005634; nucleus; cellular_component	GO:0003700; sequence-specific DNA binding transcription factor activity; molecular_function
transcript_HQ_HBZL_transcript11143/f3p0/1945	10	GO:0009236; cobalamin biosynthetic process; biological_process	GO:0003824; NA	GO:0004359; glutaminase activity; molecular_function	GO:0042823; pyridoxal phosphate biosynthetic process; biological_process	GO:0016787; hydrolase activity; molecular_function	GO:0006541; glutamine metabolic process; biological_process	GO:0000105; histidine biosynthetic process; biological_process	GO:0018580; nitronate monooxygenase activity; molecular_function	GO:0055114; oxidation-reduction process; biological_process	GO:0042819; vitamin B6 biosynthetic process; biological_process
transcript_HQ_HBZL_transcript11144/f3p0/1963	4	GO:0016705; oxidoreductase activity, acting on paired donors, with incorporation or reduction of molecular oxygen; molecular_function	GO:0055114; oxidation-reduction process; biological_process	GO:0020037; heme binding; molecular_function	GO:0005506; iron ion binding; molecular_function
transcript_HQ_HBZL_transcript11145/f2p0/1945	1	GO:0016747; transferase activity, transferring acyl groups other than amino-acyl groups; molecular_function
transcript_HQ_HBZL_transcript11147/f3p0/1952	2	GO:0016021; integral to membrane; cellular_component	GO:0055085; transmembrane transport; biological_process
transcript_HQ_HBZL_transcript11148/f8p0/1893	3	GO:0016491; oxidoreductase activity; molecular_function	GO:0055114; oxidation-reduction process; biological_process	GO:0008152; NA
transcript_HQ_HBZL_transcript1115/f3p0/3670	5	GO:0020037; heme binding; molecular_function	GO:0015979; photosynthesis; biological_process	GO:0005506; iron ion binding; molecular_function	GO:0009055; NA	GO:0031361; integral to thylakoid membrane; cellular_component
transcript_HQ_HBZL_transcript11150/f2p0/1982	5	GO:0006468; protein phosphorylation; biological_process	GO:0016773; phosphotransferase activity, alcohol group as acceptor; molecular_function	GO:0004672; protein kinase activity; molecular_function	GO:0016020; membrane; cellular_component	GO:0005524; ATP binding; molecular_function
transcript_HQ_HBZL_transcript11151/f3p0/1950	1	GO:0005515; protein binding; molecular_function
transcript_HQ_HBZL_transcript11155/f2p0/1960	1	GO:0016787; hydrolase activity; molecular_function
transcript_HQ_HBZL_transcript11156/f2p0/1964	3	GO:0016717; oxidoreductase activity, acting on paired donors, with oxidation of a pair of donors resulting in the reduction of molecular oxygen to two molecules of water; molecular_function	GO:0055114; oxidation-reduction process; biological_process	GO:0006629; lipid metabolic process; biological_process
transcript_HQ_HBZL_transcript11157/f2p0/1963	10	GO:0003677; DNA binding; molecular_function	GO:0046872; metal ion binding; molecular_function	GO:0006260; DNA replication; biological_process	GO:0005515; protein binding; molecular_function	GO:0005794; Golgi apparatus; cellular_component	GO:0003887; DNA-directed DNA polymerase activity; molecular_function	GO:0007283; spermatogenesis; biological_process	GO:0000166; nucleotide binding; molecular_function	GO:0006606; protein import into nucleus; biological_process	GO:0008408; 3'-5' exonuclease activity; molecular_function
transcript_HQ_HBZL_transcript11159/f15p0/1935	2	GO:0016021; integral to membrane; cellular_component	GO:0007034; vacuolar transport; biological_process
transcript_HQ_HBZL_transcript11162/f3p0/1951	5	GO:0006814; sodium ion transport; biological_process	GO:0055085; transmembrane transport; biological_process	GO:0005215; NA	GO:0016020; membrane; cellular_component	GO:0016021; integral to membrane; cellular_component
transcript_HQ_HBZL_transcript11163/f2p0/1945	6	GO:0016020; membrane; cellular_component	GO:0043565; sequence-specific DNA binding; molecular_function	GO:0007049; cell cycle; biological_process	GO:0006355; regulation of transcription, DNA-dependent; biological_process	GO:0005634; nucleus; cellular_component	GO:0003700; sequence-specific DNA binding transcription factor activity; molecular_function
transcript_HQ_HBZL_transcript11165/f12p0/1955	1	GO:0008152; NA
transcript_HQ_HBZL_transcript11167/f2p0/1941	3	GO:0005515; protein binding; molecular_function	GO:0008270; zinc ion binding; molecular_function	GO:0046872; metal ion binding; molecular_function
transcript_HQ_HBZL_transcript11169/f8p0/1971	2	GO:0003677; DNA binding; molecular_function	GO:0046872; metal ion binding; molecular_function
transcript_HQ_HBZL_transcript11170/f4p0/1970	3	GO:0003676; nucleic acid binding; molecular_function	GO:0005886; plasma membrane; cellular_component	GO:0016021; integral to membrane; cellular_component
transcript_HQ_HBZL_transcript11171/f3p0/1949	3	GO:0043565; sequence-specific DNA binding; molecular_function	GO:0003700; sequence-specific DNA binding transcription factor activity; molecular_function	GO:0006355; regulation of transcription, DNA-dependent; biological_process
transcript_HQ_HBZL_transcript11173/f6p0/1951	6	GO:0016020; membrane; cellular_component	GO:0005524; ATP binding; molecular_function	GO:0007165; signal transduction; biological_process	GO:0006468; protein phosphorylation; biological_process	GO:0016773; phosphotransferase activity, alcohol group as acceptor; molecular_function	GO:0004672; protein kinase activity; molecular_function
transcript_HQ_HBZL_transcript11176/f6p0/1919	2	GO:0004252; serine-type endopeptidase activity; molecular_function	GO:0016021; integral to membrane; cellular_component
transcript_HQ_HBZL_transcript1118/f3p0/3695	4	GO:0005680; anaphase-promoting complex; cellular_component	GO:0004842; ubiquitin-protein ligase activity; molecular_function	GO:0008270; zinc ion binding; molecular_function	GO:0005515; protein binding; molecular_function
transcript_HQ_HBZL_transcript11180/f6p0/1908	2	GO:0008152; NA	GO:0016597; amino acid binding; molecular_function
transcript_HQ_HBZL_transcript11181/f2p0/1957	2	GO:0008375; acetylglucosaminyltransferase activity; molecular_function	GO:0006486; protein glycosylation; biological_process
transcript_HQ_HBZL_transcript11182/f4p0/1970	3	GO:0015643; toxin binding; molecular_function	GO:0003333; amino acid transmembrane transport; biological_process	GO:0030153; bacteriocin immunity; biological_process
transcript_HQ_HBZL_transcript11186/f7p0/1943	8	GO:0030145; manganese ion binding; molecular_function	GO:0004619; phosphoglycerate mutase activity; molecular_function	GO:0006007; glucose catabolic process; biological_process	GO:0005737; cytoplasm; cellular_component	GO:0003824; NA	GO:0046872; metal ion binding; molecular_function	GO:0008152; NA	GO:0016791; phosphatase activity; molecular_function
transcript_HQ_HBZL_transcript11187/f3p0/2060	3	GO:0006520; cellular amino acid metabolic process; biological_process	GO:0016829; lyase activity; molecular_function	GO:0016740; transferase activity; molecular_function
transcript_HQ_HBZL_transcript11188/f3p0/1981	5	GO:0004842; ubiquitin-protein ligase activity; molecular_function	GO:0005680; anaphase-promoting complex; cellular_component	GO:0046872; metal ion binding; molecular_function	GO:0008270; zinc ion binding; molecular_function	GO:0005515; protein binding; molecular_function
transcript_HQ_HBZL_transcript11191/f2p0/1980	2	GO:0016020; membrane; cellular_component	GO:0016798; hydrolase activity, acting on glycosyl bonds; molecular_function
transcript_HQ_HBZL_transcript11192/f8p0/1917	3	GO:0016021; integral to membrane; cellular_component	GO:0003700; sequence-specific DNA binding transcription factor activity; molecular_function	GO:0006355; regulation of transcription, DNA-dependent; biological_process
transcript_HQ_HBZL_transcript11194/f7p0/1872	4	GO:0051287; NAD binding; molecular_function	GO:0004616; phosphogluconate dehydrogenase (decarboxylating) activity; molecular_function	GO:0016616; oxidoreductase activity, acting on the CH-OH group of donors, NAD or NADP as acceptor; molecular_function	GO:0055114; oxidation-reduction process; biological_process
transcript_HQ_HBZL_transcript11196/f8p0/1978	1	GO:0016872; intramolecular lyase activity; molecular_function
transcript_HQ_HBZL_transcript1120/f2p0/3677	8	GO:0005515; protein binding; molecular_function	GO:0016638; oxidoreductase activity, acting on the CH-NH2 group of donors; molecular_function	GO:0006468; protein phosphorylation; biological_process	GO:0042597; periplasmic space; cellular_component	GO:0009308; amine metabolic process; biological_process	GO:0055114; oxidation-reduction process; biological_process	GO:0005524; ATP binding; molecular_function	GO:0004672; protein kinase activity; molecular_function
transcript_HQ_HBZL_transcript11205/f3p0/1953	3	GO:0016021; integral to membrane; cellular_component	GO:0055085; transmembrane transport; biological_process	GO:0022857; transmembrane transporter activity; molecular_function
transcript_HQ_HBZL_transcript11206/f2p0/1944	1	GO:0005515; protein binding; molecular_function
transcript_HQ_HBZL_transcript11207/f2p0/1963	5	GO:0051287; NAD binding; molecular_function	GO:0008839; dihydrodipicolinate reductase activity; molecular_function	GO:0009089; lysine biosynthetic process via diaminopimelate; biological_process	GO:0016620; oxidoreductase activity, acting on the aldehyde or oxo group of donors, NAD or NADP as acceptor; molecular_function	GO:0055114; oxidation-reduction process; biological_process
transcript_HQ_HBZL_transcript1121/f2p0/3682	2	GO:0005515; protein binding; molecular_function	GO:0042802; identical protein binding; molecular_function
transcript_HQ_HBZL_transcript11210/f2p0/1939	3	GO:0006508; proteolysis; biological_process	GO:0005515; protein binding; molecular_function	GO:0004252; serine-type endopeptidase activity; molecular_function
transcript_HQ_HBZL_transcript11211/f2p0/1957	1	GO:0005515; protein binding; molecular_function
transcript_HQ_HBZL_transcript11214/f2p0/1976	2	GO:0009058; biosynthetic process; biological_process	GO:0030170; pyridoxal phosphate binding; molecular_function
transcript_HQ_HBZL_transcript11215/f5p0/1967	5	GO:0005215; NA	GO:0055085; transmembrane transport; biological_process	GO:0006814; sodium ion transport; biological_process	GO:0016021; integral to membrane; cellular_component	GO:0016020; membrane; cellular_component
transcript_HQ_HBZL_transcript11217/f6p0/1960	8	GO:0055085; transmembrane transport; biological_process	GO:0022857; transmembrane transporter activity; molecular_function	GO:0006810; transport; biological_process	GO:0009523; photosystem II; cellular_component	GO:0016021; integral to membrane; cellular_component	GO:0015979; photosynthesis; biological_process	GO:0009539; photosystem II reaction center; cellular_component	GO:0016020; membrane; cellular_component
transcript_HQ_HBZL_transcript1122/f2p0/3666	3	GO:0005634; nucleus; cellular_component	GO:0003677; DNA binding; molecular_function	GO:0005515; protein binding; molecular_function
transcript_HQ_HBZL_transcript11220/f262p0/1918	3	GO:0006597; spermine biosynthetic process; biological_process	GO:0008295; spermidine biosynthetic process; biological_process	GO:0004014; adenosylmethionine decarboxylase activity; molecular_function
transcript_HQ_HBZL_transcript11221/f4p0/1956	3	GO:0004672; protein kinase activity; molecular_function	GO:0006468; protein phosphorylation; biological_process	GO:0005524; ATP binding; molecular_function
transcript_HQ_HBZL_transcript11222/f2p0/1944	1	GO:0005524; ATP binding; molecular_function
transcript_HQ_HBZL_transcript11223/f7p0/1945	2	GO:0055085; transmembrane transport; biological_process	GO:0016021; integral to membrane; cellular_component
transcript_HQ_HBZL_transcript11228/f4p0/1964	2	GO:0003676; nucleic acid binding; molecular_function	GO:0008270; zinc ion binding; molecular_function
transcript_HQ_HBZL_transcript11230/f2p0/1944	1	GO:0051539; 4 iron, 4 sulfur cluster binding; molecular_function
transcript_HQ_HBZL_transcript11231/f20p0/1922	2	GO:0004553; hydrolase activity, hydrolyzing O-glycosyl compounds; molecular_function	GO:0005975; carbohydrate metabolic process; biological_process
transcript_HQ_HBZL_transcript11232/f2p0/1969	4	GO:0005618; cell wall; cellular_component	GO:0030599; pectinesterase activity; molecular_function	GO:0004857; enzyme inhibitor activity; molecular_function	GO:0042545; cell wall modification; biological_process
transcript_HQ_HBZL_transcript11234/f14p0/1909	8	GO:0045454; cell redox homeostasis; biological_process	GO:0016491; oxidoreductase activity; molecular_function	GO:0016209; NA	GO:0009055; NA	GO:0009306; protein secretion; biological_process	GO:0055114; oxidation-reduction process; biological_process	GO:0015035; protein disulfide oxidoreductase activity; molecular_function	GO:0005788; endoplasmic reticulum lumen; cellular_component
transcript_HQ_HBZL_transcript11235/f2p0/1945	3	GO:0003677; DNA binding; molecular_function	GO:0006351; transcription, DNA-dependent; biological_process	GO:0003899; DNA-directed RNA polymerase activity; molecular_function
transcript_HQ_HBZL_transcript11237/f4p0/1980	5	GO:0016757; transferase activity, transferring glycosyl groups; molecular_function	GO:0016020; membrane; cellular_component	GO:0006486; protein glycosylation; biological_process	GO:0016021; integral to membrane; cellular_component	GO:0008378; galactosyltransferase activity; molecular_function
transcript_HQ_HBZL_transcript11238/f7p0/1928	3	GO:0008289; lipid binding; molecular_function	GO:0009405; pathogenesis; biological_process	GO:0005515; protein binding; molecular_function
transcript_HQ_HBZL_transcript11239/f2p0/1949	2	GO:0003824; NA	GO:0008152; NA
transcript_HQ_HBZL_transcript1124/f4p0/3690	7	GO:0008033; tRNA processing; biological_process	GO:0016491; oxidoreductase activity; molecular_function	GO:0050660; flavin adenine dinucleotide binding; molecular_function	GO:0006779; porphyrin biosynthetic process; biological_process	GO:0019354; siroheme biosynthetic process; biological_process	GO:0055114; oxidation-reduction process; biological_process	GO:0043115; precorrin-2 dehydrogenase activity; molecular_function
transcript_HQ_HBZL_transcript11243/f2p0/1945	2	GO:0015031; protein transport; biological_process	GO:0016020; membrane; cellular_component
transcript_HQ_HBZL_transcript11244/f2p0/1943	2	GO:0005975; carbohydrate metabolic process; biological_process	GO:0004650; polygalacturonase activity; molecular_function
transcript_HQ_HBZL_transcript11245/f2p0/1938	3	GO:0022857; transmembrane transporter activity; molecular_function	GO:0055085; transmembrane transport; biological_process	GO:0016021; integral to membrane; cellular_component
transcript_HQ_HBZL_transcript11246/f3p0/1949	4	GO:0055114; oxidation-reduction process; biological_process	GO:0016705; oxidoreductase activity, acting on paired donors, with incorporation or reduction of molecular oxygen; molecular_function	GO:0020037; heme binding; molecular_function	GO:0005506; iron ion binding; molecular_function
transcript_HQ_HBZL_transcript11247/f2p0/1942	7	GO:0006402; mRNA catabolic process; biological_process	GO:0003676; nucleic acid binding; molecular_function	GO:0005634; nucleus; cellular_component	GO:0046872; metal ion binding; molecular_function	GO:0003723; RNA binding; molecular_function	GO:0005737; cytoplasm; cellular_component	GO:0004535; poly(A)-specific ribonuclease activity; molecular_function
transcript_HQ_HBZL_transcript11248/f2p0/1935	4	GO:0016705; oxidoreductase activity, acting on paired donors, with incorporation or reduction of molecular oxygen; molecular_function	GO:0055114; oxidation-reduction process; biological_process	GO:0005506; iron ion binding; molecular_function	GO:0020037; heme binding; molecular_function
transcript_HQ_HBZL_transcript11249/f5p0/1940	4	GO:0055114; oxidation-reduction process; biological_process	GO:0016705; oxidoreductase activity, acting on paired donors, with incorporation or reduction of molecular oxygen; molecular_function	GO:0020037; heme binding; molecular_function	GO:0005506; iron ion binding; molecular_function
transcript_HQ_HBZL_transcript11251/f2p0/1938	3	GO:0005524; ATP binding; molecular_function	GO:0005975; carbohydrate metabolic process; biological_process	GO:0016773; phosphotransferase activity, alcohol group as acceptor; molecular_function
transcript_HQ_HBZL_transcript11256/f3p0/1916	7	GO:0055085; transmembrane transport; biological_process	GO:0005351; sugar:hydrogen symporter activity; molecular_function	GO:0006810; transport; biological_process	GO:0008643; carbohydrate transport; biological_process	GO:0000139; Golgi membrane; cellular_component	GO:0016020; membrane; cellular_component	GO:0016021; integral to membrane; cellular_component
transcript_HQ_HBZL_transcript11259/f4p0/1957	4	GO:0042545; cell wall modification; biological_process	GO:0004857; enzyme inhibitor activity; molecular_function	GO:0030599; pectinesterase activity; molecular_function	GO:0005618; cell wall; cellular_component
transcript_HQ_HBZL_transcript1126/f3p0/3659	7	GO:0004842; ubiquitin-protein ligase activity; molecular_function	GO:0030145; manganese ion binding; molecular_function	GO:0016567; protein ubiquitination; biological_process	GO:0005515; protein binding; molecular_function	GO:0000287; magnesium ion binding; molecular_function	GO:0004721; phosphoprotein phosphatase activity; molecular_function	GO:0008270; zinc ion binding; molecular_function
transcript_HQ_HBZL_transcript11268/f3p0/1936	2	GO:0003682; chromatin binding; molecular_function	GO:0006351; transcription, DNA-dependent; biological_process
transcript_HQ_HBZL_transcript11269/f3p0/1948	3	GO:0009405; pathogenesis; biological_process	GO:0001700; embryonic development via the syncytial blastoderm; biological_process	GO:0007259; JAK-STAT cascade; biological_process
transcript_HQ_HBZL_transcript1127/f2p0/3662	3	GO:0005975; carbohydrate metabolic process; biological_process	GO:0000902; cell morphogenesis; biological_process	GO:0016773; phosphotransferase activity, alcohol group as acceptor; molecular_function
transcript_HQ_HBZL_transcript11270/f2p0/1961	1	GO:0003924; GTPase activity; molecular_function
transcript_HQ_HBZL_transcript11278/f5p0/1934	3	GO:0006355; regulation of transcription, DNA-dependent; biological_process	GO:0003700; sequence-specific DNA binding transcription factor activity; molecular_function	GO:0043565; sequence-specific DNA binding; molecular_function
transcript_HQ_HBZL_transcript11279/f8p0/1934	4	GO:0009058; biosynthetic process; biological_process	GO:0030170; pyridoxal phosphate binding; molecular_function	GO:0016831; carboxy-lyase activity; molecular_function	GO:0019752; carboxylic acid metabolic process; biological_process
transcript_HQ_HBZL_transcript11280/f2p0/1953	4	GO:0042545; cell wall modification; biological_process	GO:0004857; enzyme inhibitor activity; molecular_function	GO:0005618; cell wall; cellular_component	GO:0030599; pectinesterase activity; molecular_function
transcript_HQ_HBZL_transcript11281/f2p0/2027	4	GO:0005634; nucleus; cellular_component	GO:0003677; DNA binding; molecular_function	GO:0009725; response to hormone stimulus; biological_process	GO:0006355; regulation of transcription, DNA-dependent; biological_process
transcript_HQ_HBZL_transcript11282/f5p0/1938	1	GO:0003824; NA
transcript_HQ_HBZL_transcript11288/f3p0/1941	6	GO:0055114; oxidation-reduction process; biological_process	GO:0006098; pentose-phosphate shunt; biological_process	GO:0016491; oxidoreductase activity; molecular_function	GO:0006631; fatty acid metabolic process; biological_process	GO:0003857; 3-hydroxyacyl-CoA dehydrogenase activity; molecular_function	GO:0004616; phosphogluconate dehydrogenase (decarboxylating) activity; molecular_function
transcript_HQ_HBZL_transcript11289/f2p0/1949	2	GO:0016021; integral to membrane; cellular_component	GO:0055085; transmembrane transport; biological_process
transcript_HQ_HBZL_transcript1129/f2p0/3720	1	GO:0005516; calmodulin binding; molecular_function
transcript_HQ_HBZL_transcript11291/f3p0/1971	5	GO:0016021; integral to membrane; cellular_component	GO:0016020; membrane; cellular_component	GO:0005215; NA	GO:0055085; transmembrane transport; biological_process	GO:0006814; sodium ion transport; biological_process
transcript_HQ_HBZL_transcript11292/f7p0/1944	5	GO:0006633; fatty acid biosynthetic process; biological_process	GO:0004315; 3-oxoacyl-[acyl-carrier-protein] synthase activity; molecular_function	GO:0016020; membrane; cellular_component	GO:0016747; transferase activity, transferring acyl groups other than amino-acyl groups; molecular_function	GO:0005267; potassium channel activity; molecular_function
transcript_HQ_HBZL_transcript11293/f3p0/2013	4	GO:0055114; oxidation-reduction process; biological_process	GO:0016705; oxidoreductase activity, acting on paired donors, with incorporation or reduction of molecular oxygen; molecular_function	GO:0020037; heme binding; molecular_function	GO:0005506; iron ion binding; molecular_function
transcript_HQ_HBZL_transcript11296/f3p0/1941	1	GO:0003676; nucleic acid binding; molecular_function
transcript_HQ_HBZL_transcript1130/f3p0/3695	2	GO:0005992; trehalose biosynthetic process; biological_process	GO:0003824; NA
transcript_HQ_HBZL_transcript11300/f2p0/1936	5	GO:0004842; ubiquitin-protein ligase activity; molecular_function	GO:0016567; protein ubiquitination; biological_process	GO:0004842; ubiquitin-protein ligase activity; molecular_function	GO:0005515; protein binding; molecular_function	GO:0016567; protein ubiquitination; biological_process
transcript_HQ_HBZL_transcript11301/f2p0/1931	3	GO:0016021; integral to membrane; cellular_component	GO:0022857; transmembrane transporter activity; molecular_function	GO:0055085; transmembrane transport; biological_process
transcript_HQ_HBZL_transcript11302/f4p0/1943	8	GO:0006813; potassium ion transport; biological_process	GO:0006811; ion transport; biological_process	GO:0016021; integral to membrane; cellular_component	GO:0005216; ion channel activity; molecular_function	GO:0005509; calcium ion binding; molecular_function	GO:0055085; transmembrane transport; biological_process	GO:0016020; membrane; cellular_component	GO:0005242; inward rectifier potassium channel activity; molecular_function
transcript_HQ_HBZL_transcript11304/f4p0/1938	3	GO:0005515; protein binding; molecular_function	GO:0045040; protein import into mitochondrial outer membrane; biological_process	GO:0005742; mitochondrial outer membrane translocase complex; cellular_component
transcript_HQ_HBZL_transcript11305/f3p0/1941	11	GO:0005578; proteinaceous extracellular matrix; cellular_component	GO:0004672; protein kinase activity; molecular_function	GO:0016773; phosphotransferase activity, alcohol group as acceptor; molecular_function	GO:0007165; signal transduction; biological_process	GO:0005524; ATP binding; molecular_function	GO:0016020; membrane; cellular_component	GO:0004553; hydrolase activity, hydrolyzing O-glycosyl compounds; molecular_function	GO:0000272; polysaccharide catabolic process; biological_process	GO:0005509; calcium ion binding; molecular_function	GO:0006468; protein phosphorylation; biological_process	GO:0005515; protein binding; molecular_function
transcript_HQ_HBZL_transcript11306/f15p0/1838	2	GO:0008152; NA	GO:0016747; transferase activity, transferring acyl groups other than amino-acyl groups; molecular_function
transcript_HQ_HBZL_transcript11307/f13p0/1942	9	GO:0030173; integral to Golgi membrane; cellular_component	GO:0006891; intra-Golgi vesicle-mediated transport; biological_process	GO:0006260; DNA replication; biological_process	GO:0003700; sequence-specific DNA binding transcription factor activity; molecular_function	GO:0003677; DNA binding; molecular_function	GO:1901031; NA	GO:0006355; regulation of transcription, DNA-dependent; biological_process	GO:0005634; nucleus; cellular_component	GO:0043565; sequence-specific DNA binding; molecular_function
transcript_HQ_HBZL_transcript11308/f2p0/1934	1	GO:0005515; protein binding; molecular_function
transcript_HQ_HBZL_transcript11310/f10p0/1927	5	GO:0005524; ATP binding; molecular_function	GO:0005975; carbohydrate metabolic process; biological_process	GO:0004418; hydroxymethylbilane synthase activity; molecular_function	GO:0033014; tetrapyrrole biosynthetic process; biological_process	GO:0016773; phosphotransferase activity, alcohol group as acceptor; molecular_function
transcript_HQ_HBZL_transcript11312/f2p0/1945	8	GO:0030145; manganese ion binding; molecular_function	GO:0005737; cytoplasm; cellular_component	GO:0006007; glucose catabolic process; biological_process	GO:0004619; phosphoglycerate mutase activity; molecular_function	GO:0046872; metal ion binding; molecular_function	GO:0003824; NA	GO:0016791; phosphatase activity; molecular_function	GO:0008152; NA
transcript_HQ_HBZL_transcript11318/f5p0/1941	2	GO:0031072; heat shock protein binding; molecular_function	GO:0051082; unfolded protein binding; molecular_function
transcript_HQ_HBZL_transcript11319/f2p0/1934	3	GO:0016491; oxidoreductase activity; molecular_function	GO:0050660; flavin adenine dinucleotide binding; molecular_function	GO:0055114; oxidation-reduction process; biological_process
transcript_HQ_HBZL_transcript11322/f2p0/1943	1	GO:0005515; protein binding; molecular_function
transcript_HQ_HBZL_transcript11324/f5p0/1940	1	GO:0005515; protein binding; molecular_function
transcript_HQ_HBZL_transcript11327/f4p0/1931	4	GO:0008152; NA	GO:0010333; terpene synthase activity; molecular_function	GO:0016829; lyase activity; molecular_function	GO:0000287; magnesium ion binding; molecular_function
transcript_HQ_HBZL_transcript11329/f4p0/1941	3	GO:0030170; pyridoxal phosphate binding; molecular_function	GO:0016831; carboxy-lyase activity; molecular_function	GO:0019752; carboxylic acid metabolic process; biological_process
transcript_HQ_HBZL_transcript1133/f27p0/3636	1	GO:0016020; membrane; cellular_component
transcript_HQ_HBZL_transcript11330/f3p0/1935	8	GO:0005506; iron ion binding; molecular_function	GO:0005840; ribosome; cellular_component	GO:0003735; structural constituent of ribosome; molecular_function	GO:0016705; oxidoreductase activity, acting on paired donors, with incorporation or reduction of molecular oxygen; molecular_function	GO:0005622; intracellular; cellular_component	GO:0020037; heme binding; molecular_function	GO:0006412; translation; biological_process	GO:0055114; oxidation-reduction process; biological_process
transcript_HQ_HBZL_transcript11333/f2p0/1938	2	GO:0016021; integral to membrane; cellular_component	GO:0055085; transmembrane transport; biological_process
transcript_HQ_HBZL_transcript1134/f5p0/3671	4	GO:0006260; DNA replication; biological_process	GO:0005634; nucleus; cellular_component	GO:0007010; cytoskeleton organization; biological_process	GO:0003779; actin binding; molecular_function
transcript_HQ_HBZL_transcript11340/f2p0/1929	4	GO:0055085; transmembrane transport; biological_process	GO:0015299; solute:hydrogen antiporter activity; molecular_function	GO:0006812; cation transport; biological_process	GO:0016021; integral to membrane; cellular_component
transcript_HQ_HBZL_transcript11341/f2p0/1936	2	GO:0005515; protein binding; molecular_function	GO:0003824; NA
transcript_HQ_HBZL_transcript11342/f2p0/1933	3	GO:0006629; lipid metabolic process; biological_process	GO:0016788; hydrolase activity, acting on ester bonds; molecular_function	GO:0008374; O-acyltransferase activity; molecular_function
transcript_HQ_HBZL_transcript11343/f4p0/1936	4	GO:0016149; translation release factor activity, codon specific; molecular_function	GO:0003747; translation release factor activity; molecular_function	GO:0005737; cytoplasm; cellular_component	GO:0006415; translational termination; biological_process
transcript_HQ_HBZL_transcript11345/f9p0/1956	4	GO:0050992; dimethylallyl diphosphate biosynthetic process; biological_process	GO:0046872; metal ion binding; molecular_function	GO:0051745; 4-hydroxy-3-methylbut-2-en-1-yl diphosphate reductase activity; molecular_function	GO:0019288; isopentenyl diphosphate biosynthetic process, mevalonate-independent pathway; biological_process
transcript_HQ_HBZL_transcript11347/f2p0/1950	4	GO:0004609; phosphatidylserine decarboxylase activity; molecular_function	GO:0008654; phospholipid biosynthetic process; biological_process	GO:0004609; phosphatidylserine decarboxylase activity; molecular_function	GO:0008654; phospholipid biosynthetic process; biological_process
transcript_HQ_HBZL_transcript11349/f4p0/1941	3	GO:0003700; sequence-specific DNA binding transcription factor activity; molecular_function	GO:0005634; nucleus; cellular_component	GO:0006355; regulation of transcription, DNA-dependent; biological_process
transcript_HQ_HBZL_transcript11351/f3p0/1951	2	GO:0008373; sialyltransferase activity; molecular_function	GO:0006486; protein glycosylation; biological_process
transcript_HQ_HBZL_transcript11356/f2p0/1937	2	GO:0090266; regulation of mitotic cell cycle spindle assembly checkpoint; biological_process	GO:0005680; anaphase-promoting complex; cellular_component
transcript_HQ_HBZL_transcript11359/f4p0/1942	3	GO:0046872; metal ion binding; molecular_function	GO:0016787; hydrolase activity; molecular_function	GO:0003993; acid phosphatase activity; molecular_function
transcript_HQ_HBZL_transcript11361/f2p0/1942	6	GO:0016020; membrane; cellular_component	GO:0005524; ATP binding; molecular_function	GO:0006468; protein phosphorylation; biological_process	GO:0007165; signal transduction; biological_process	GO:0016773; phosphotransferase activity, alcohol group as acceptor; molecular_function	GO:0004672; protein kinase activity; molecular_function
transcript_HQ_HBZL_transcript11364/f7p0/1970	2	GO:0030170; pyridoxal phosphate binding; molecular_function	GO:0009058; biosynthetic process; biological_process
transcript_HQ_HBZL_transcript11368/f3p0/1944	2	GO:0008152; NA	GO:0016747; transferase activity, transferring acyl groups other than amino-acyl groups; molecular_function
transcript_HQ_HBZL_transcript11369/f3p0/1938	4	GO:0016021; integral to membrane; cellular_component	GO:0015098; molybdate ion transmembrane transporter activity; molecular_function	GO:0055085; transmembrane transport; biological_process	GO:0015689; molybdate ion transport; biological_process
transcript_HQ_HBZL_transcript11370/f52p0/1872	3	GO:0005524; ATP binding; molecular_function	GO:0006468; protein phosphorylation; biological_process	GO:0004672; protein kinase activity; molecular_function
transcript_HQ_HBZL_transcript11373/f2p0/1939	2	GO:0006351; transcription, DNA-dependent; biological_process	GO:0046983; protein dimerization activity; molecular_function
transcript_HQ_HBZL_transcript11374/f2p0/1931	5	GO:0055085; transmembrane transport; biological_process	GO:0015238; drug transmembrane transporter activity; molecular_function	GO:0015297; antiporter activity; molecular_function	GO:0006855; drug transmembrane transport; biological_process	GO:0016020; membrane; cellular_component
transcript_HQ_HBZL_transcript11376/f3p0/1937	5	GO:0004764; shikimate 5-dehydrogenase activity; molecular_function	GO:0051287; NAD binding; molecular_function	GO:0016153; urocanate hydratase activity; molecular_function	GO:0055114; oxidation-reduction process; biological_process	GO:0003855; 3-dehydroquinate dehydratase activity; molecular_function
transcript_HQ_HBZL_transcript11378/f2p0/1926	11	GO:0016021; integral to membrane; cellular_component	GO:0006813; potassium ion transport; biological_process	GO:0071949; FAD binding; molecular_function	GO:0016491; oxidoreductase activity; molecular_function	GO:0046168; glycerol-3-phosphate catabolic process; biological_process	GO:0004506; squalene monooxygenase activity; molecular_function	GO:0055114; oxidation-reduction process; biological_process	GO:0051287; NAD binding; molecular_function	GO:0050660; flavin adenine dinucleotide binding; molecular_function	GO:0008033; tRNA processing; biological_process	GO:0016616; oxidoreductase activity, acting on the CH-OH group of donors, NAD or NADP as acceptor; molecular_function
transcript_HQ_HBZL_transcript11380/f2p0/1938	4	GO:0020037; heme binding; molecular_function	GO:0005506; iron ion binding; molecular_function	GO:0016705; oxidoreductase activity, acting on paired donors, with incorporation or reduction of molecular oxygen; molecular_function	GO:0055114; oxidation-reduction process; biological_process
transcript_HQ_HBZL_transcript11387/f5p0/1930	5	GO:0016020; membrane; cellular_component	GO:0005524; ATP binding; molecular_function	GO:0016773; phosphotransferase activity, alcohol group as acceptor; molecular_function	GO:0006468; protein phosphorylation; biological_process	GO:0004672; protein kinase activity; molecular_function
transcript_HQ_HBZL_transcript11389/f2p0/1965	2	GO:0005525; GTP binding; molecular_function	GO:0003924; GTPase activity; molecular_function
transcript_HQ_HBZL_transcript11390/f22p0/1918	2	GO:0006633; fatty acid biosynthetic process; biological_process	GO:0016790; thiolester hydrolase activity; molecular_function
transcript_HQ_HBZL_transcript11391/f2p0/1988	3	GO:0009452; RNA capping; biological_process	GO:0001510; RNA methylation; biological_process	GO:0008168; methyltransferase activity; molecular_function
transcript_HQ_HBZL_transcript11392/f3p0/1924	1	GO:0005515; protein binding; molecular_function
transcript_HQ_HBZL_transcript11394/f4p0/1925	3	GO:0016491; oxidoreductase activity; molecular_function	GO:0055114; oxidation-reduction process; biological_process	GO:0005507; copper ion binding; molecular_function
transcript_HQ_HBZL_transcript11395/f2p0/1947	6	GO:0016021; integral to membrane; cellular_component	GO:0016020; membrane; cellular_component	GO:0006810; transport; biological_process	GO:0005215; NA	GO:0022857; transmembrane transporter activity; molecular_function	GO:0055085; transmembrane transport; biological_process
transcript_HQ_HBZL_transcript11396/f3p0/1935	3	GO:0046872; metal ion binding; molecular_function	GO:0008270; zinc ion binding; molecular_function	GO:0005515; protein binding; molecular_function
transcript_HQ_HBZL_transcript114/f3p0/5751	6	GO:0006810; transport; biological_process	GO:0055085; transmembrane transport; biological_process	GO:0042626; ATPase activity, coupled to transmembrane movement of substances; molecular_function	GO:0016021; integral to membrane; cellular_component	GO:0016887; ATPase activity; molecular_function	GO:0005524; ATP binding; molecular_function
transcript_HQ_HBZL_transcript1140/f2p0/3675	2	GO:0005515; protein binding; molecular_function	GO:0043531; ADP binding; molecular_function
transcript_HQ_HBZL_transcript11400/f12p0/1941	2	GO:0055085; transmembrane transport; biological_process	GO:0016021; integral to membrane; cellular_component
transcript_HQ_HBZL_transcript11404/f2p0/1930	3	GO:0016020; membrane; cellular_component	GO:0005215; NA	GO:0006810; transport; biological_process
transcript_HQ_HBZL_transcript11406/f2p0/1897	4	GO:0005524; ATP binding; molecular_function	GO:0005515; protein binding; molecular_function	GO:0004672; protein kinase activity; molecular_function	GO:0006468; protein phosphorylation; biological_process
transcript_HQ_HBZL_transcript11407/f2p0/1950	1	GO:0005515; protein binding; molecular_function
transcript_HQ_HBZL_transcript11412/f3p0/1906	4	GO:0016829; lyase activity; molecular_function	GO:0030170; pyridoxal phosphate binding; molecular_function	GO:0009058; biosynthetic process; biological_process	GO:0006520; cellular amino acid metabolic process; biological_process
transcript_HQ_HBZL_transcript11414/f3p0/1931	3	GO:0016788; hydrolase activity, acting on ester bonds; molecular_function	GO:0006629; lipid metabolic process; biological_process	GO:0016787; hydrolase activity; molecular_function
transcript_HQ_HBZL_transcript11415/f4p0/1923	2	GO:0005515; protein binding; molecular_function	GO:0043248; proteasome assembly; biological_process
transcript_HQ_HBZL_transcript11417/f2p0/1936	4	GO:0008318; protein prenyltransferase activity; molecular_function	GO:0018342; protein prenylation; biological_process	GO:0018342; protein prenylation; biological_process	GO:0008318; protein prenyltransferase activity; molecular_function
transcript_HQ_HBZL_transcript11418/f2p0/1924	2	GO:0004553; hydrolase activity, hydrolyzing O-glycosyl compounds; molecular_function	GO:0005975; carbohydrate metabolic process; biological_process
transcript_HQ_HBZL_transcript1142/f2p0/3670	6	GO:0003777; microtubule motor activity; molecular_function	GO:0006810; transport; biological_process	GO:0007018; microtubule-based movement; biological_process	GO:0008017; microtubule binding; molecular_function	GO:0005886; plasma membrane; cellular_component	GO:0005524; ATP binding; molecular_function
transcript_HQ_HBZL_transcript11425/f2p0/1949	3	GO:0005622; intracellular; cellular_component	GO:0006355; regulation of transcription, DNA-dependent; biological_process	GO:0003677; DNA binding; molecular_function
transcript_HQ_HBZL_transcript11428/f2p0/1922	1	GO:0005096; GTPase activator activity; molecular_function
transcript_HQ_HBZL_transcript1143/f2p0/3683	4	GO:0008270; zinc ion binding; molecular_function	GO:0016592; mediator complex; cellular_component	GO:0006357; regulation of transcription from RNA polymerase II promoter; biological_process	GO:0001104; RNA polymerase II transcription cofactor activity; molecular_function
transcript_HQ_HBZL_transcript11430/f3p0/1955	3	GO:0005524; ATP binding; molecular_function	GO:0005975; carbohydrate metabolic process; biological_process	GO:0016773; phosphotransferase activity, alcohol group as acceptor; molecular_function
transcript_HQ_HBZL_transcript11431/f9p0/1936	3	GO:0005524; ATP binding; molecular_function	GO:0006468; protein phosphorylation; biological_process	GO:0004672; protein kinase activity; molecular_function
transcript_HQ_HBZL_transcript11432/f2p0/1879	1	GO:0005515; protein binding; molecular_function
transcript_HQ_HBZL_transcript11433/f4p0/1940	5	GO:0005622; intracellular; cellular_component	GO:0003676; nucleic acid binding; molecular_function	GO:0019013; viral nucleocapsid; cellular_component	GO:0006810; transport; biological_process	GO:0019074; viral RNA genome packaging; biological_process
transcript_HQ_HBZL_transcript11435/f2p0/1931	1	GO:0006629; lipid metabolic process; biological_process
transcript_HQ_HBZL_transcript11437/f6p0/1936	4	GO:0016705; oxidoreductase activity, acting on paired donors, with incorporation or reduction of molecular oxygen; molecular_function	GO:0055114; oxidation-reduction process; biological_process	GO:0020037; heme binding; molecular_function	GO:0005506; iron ion binding; molecular_function
transcript_HQ_HBZL_transcript11439/f2p0/1920	1	GO:0003824; NA
transcript_HQ_HBZL_transcript1144/f2p0/3646	2	GO:0006886; intracellular protein transport; biological_process	GO:0008536; Ran GTPase binding; molecular_function
transcript_HQ_HBZL_transcript11443/f3p0/1927	5	GO:0055085; transmembrane transport; biological_process	GO:0015238; drug transmembrane transporter activity; molecular_function	GO:0015297; antiporter activity; molecular_function	GO:0006855; drug transmembrane transport; biological_process	GO:0016020; membrane; cellular_component
transcript_HQ_HBZL_transcript11444/f5p0/1933	5	GO:0016773; phosphotransferase activity, alcohol group as acceptor; molecular_function	GO:0006468; protein phosphorylation; biological_process	GO:0004672; protein kinase activity; molecular_function	GO:0016020; membrane; cellular_component	GO:0005524; ATP binding; molecular_function
transcript_HQ_HBZL_transcript11449/f2p0/1968	2	GO:0016021; integral to membrane; cellular_component	GO:0055085; transmembrane transport; biological_process
transcript_HQ_HBZL_transcript1145/f3p0/3660	2	GO:0005634; nucleus; cellular_component	GO:0051726; regulation of cell cycle; biological_process
transcript_HQ_HBZL_transcript11453/f2p0/1915	10	GO:0004871; signal transducer activity; molecular_function	GO:0031683; G-protein beta/gamma-subunit complex binding; molecular_function	GO:0005525; GTP binding; molecular_function	GO:0007186; G-protein coupled receptor protein signaling pathway; biological_process	GO:0007264; small GTPase mediated signal transduction; biological_process	GO:0019001; guanyl nucleotide binding; molecular_function	GO:0003873; 6-phosphofructo-2-kinase activity; molecular_function	GO:0006000; fructose metabolic process; biological_process	GO:0003924; GTPase activity; molecular_function	GO:0005524; ATP binding; molecular_function
transcript_HQ_HBZL_transcript11454/f3p0/1942	5	GO:0004842; ubiquitin-protein ligase activity; molecular_function	GO:0005680; anaphase-promoting complex; cellular_component	GO:0046872; metal ion binding; molecular_function	GO:0008270; zinc ion binding; molecular_function	GO:0005515; protein binding; molecular_function
transcript_HQ_HBZL_transcript11455/f6p0/1958	1	GO:0016787; hydrolase activity; molecular_function
transcript_HQ_HBZL_transcript1146/f2p0/3659	2	GO:0008152; NA	GO:0003824; NA
transcript_HQ_HBZL_transcript11460/f4p0/1979	2	GO:0008152; NA	GO:0003824; NA
transcript_HQ_HBZL_transcript11464/f2p0/1933	3	GO:0006810; transport; biological_process	GO:0008565; protein transporter activity; molecular_function	GO:0016020; membrane; cellular_component
transcript_HQ_HBZL_transcript11465/f16p0/1899	6	GO:0005515; protein binding; molecular_function	GO:0016055; Wnt receptor signaling pathway; biological_process	GO:0008270; zinc ion binding; molecular_function	GO:0004842; ubiquitin-protein ligase activity; molecular_function	GO:0046872; metal ion binding; molecular_function	GO:0005680; anaphase-promoting complex; cellular_component
transcript_HQ_HBZL_transcript11466/f8p0/1935	1	GO:0005515; protein binding; molecular_function
transcript_HQ_HBZL_transcript11467/f3p0/1929	4	GO:0005737; cytoplasm; cellular_component	GO:0005852; eukaryotic translation initiation factor 3 complex; cellular_component	GO:0008023; transcription elongation factor complex; cellular_component	GO:0003743; translation initiation factor activity; molecular_function
transcript_HQ_HBZL_transcript11468/f12p0/1957	1	GO:0005634; nucleus; cellular_component
transcript_HQ_HBZL_transcript1147/f2p0/3659	1	GO:0003677; DNA binding; molecular_function
transcript_HQ_HBZL_transcript11472/f3p0/1932	3	GO:0016020; membrane; cellular_component	GO:0003333; amino acid transmembrane transport; biological_process	GO:0015171; amino acid transmembrane transporter activity; molecular_function
transcript_HQ_HBZL_transcript11475/f2p0/1971	3	GO:0043565; sequence-specific DNA binding; molecular_function	GO:0003700; sequence-specific DNA binding transcription factor activity; molecular_function	GO:0006355; regulation of transcription, DNA-dependent; biological_process
transcript_HQ_HBZL_transcript11477/f5p0/1924	3	GO:0003677; DNA binding; molecular_function	GO:0016757; transferase activity, transferring glycosyl groups; molecular_function	GO:0008152; NA
transcript_HQ_HBZL_transcript11478/f3p0/1936	1	GO:0048255; mRNA stabilization; biological_process
transcript_HQ_HBZL_transcript11481/f2p0/1926	2	GO:0006355; regulation of transcription, DNA-dependent; biological_process	GO:0003677; DNA binding; molecular_function
transcript_HQ_HBZL_transcript11482/f6p0/1950	1	GO:0016765; transferase activity, transferring alkyl or aryl (other than methyl) groups; molecular_function
transcript_HQ_HBZL_transcript11483/f2p0/1924	5	GO:0006855; drug transmembrane transport; biological_process	GO:0016020; membrane; cellular_component	GO:0015297; antiporter activity; molecular_function	GO:0015238; drug transmembrane transporter activity; molecular_function	GO:0055085; transmembrane transport; biological_process
transcript_HQ_HBZL_transcript11485/f10p0/1926	16	GO:0001510; RNA methylation; biological_process	GO:0008033; tRNA processing; biological_process	GO:0009877; nodulation; biological_process	GO:0008168; methyltransferase activity; molecular_function	GO:0008171; O-methyltransferase activity; molecular_function	GO:0008757; S-adenosylmethionine-dependent methyltransferase activity; molecular_function	GO:0003723; RNA binding; molecular_function	GO:0006480; N-terminal protein amino acid methylation; biological_process	GO:0006364; rRNA processing; biological_process	GO:0032259; methylation; biological_process	GO:0006400; tRNA modification; biological_process	GO:0009312; oligosaccharide biosynthetic process; biological_process	GO:0018024; histone-lysine N-methyltransferase activity; molecular_function	GO:0009452; RNA capping; biological_process	GO:0008152; NA	GO:0008176; tRNA (guanine-N7-)-methyltransferase activity; molecular_function
transcript_HQ_HBZL_transcript11486/f2p0/1921	15	GO:0007155; cell adhesion; biological_process	GO:0019031; viral envelope; cellular_component	GO:0007010; cytoskeleton organization; biological_process	GO:0071203; WASH complex; cellular_component	GO:0006355; regulation of transcription, DNA-dependent; biological_process	GO:0005524; ATP binding; molecular_function	GO:0005576; NA	GO:0006260; DNA replication; biological_process	GO:0003677; DNA binding; molecular_function	GO:0006270; DNA-dependent DNA replication initiation; biological_process	GO:0008134; transcription factor binding; molecular_function	GO:0001503; ossification; biological_process	GO:0006351; transcription, DNA-dependent; biological_process	GO:0003887; DNA-directed DNA polymerase activity; molecular_function	GO:0003779; actin binding; molecular_function
transcript_HQ_HBZL_transcript11488/f2p0/1959	2	GO:0004553; hydrolase activity, hydrolyzing O-glycosyl compounds; molecular_function	GO:0005975; carbohydrate metabolic process; biological_process
transcript_HQ_HBZL_transcript11489/f2p0/1941	8	GO:0009306; protein secretion; biological_process	GO:0055114; oxidation-reduction process; biological_process	GO:0005788; endoplasmic reticulum lumen; cellular_component	GO:0005634; nucleus; cellular_component	GO:0008270; zinc ion binding; molecular_function	GO:0045454; cell redox homeostasis; biological_process	GO:0016491; oxidoreductase activity; molecular_function	GO:0016209; NA
transcript_HQ_HBZL_transcript11490/f3p0/1933	5	GO:0004315; 3-oxoacyl-[acyl-carrier-protein] synthase activity; molecular_function	GO:0016020; membrane; cellular_component	GO:0006633; fatty acid biosynthetic process; biological_process	GO:0016747; transferase activity, transferring acyl groups other than amino-acyl groups; molecular_function	GO:0005267; potassium channel activity; molecular_function
transcript_HQ_HBZL_transcript11493/f3p0/1902	3	GO:0055114; oxidation-reduction process; biological_process	GO:0005507; copper ion binding; molecular_function	GO:0016491; oxidoreductase activity; molecular_function
transcript_HQ_HBZL_transcript11495/f2p0/1929	1	GO:0005524; ATP binding; molecular_function
transcript_HQ_HBZL_transcript11503/f2p0/1914	2	GO:0008152; NA	GO:0016758; transferase activity, transferring hexosyl groups; molecular_function
transcript_HQ_HBZL_transcript11505/f4p0/1933	3	GO:0005524; ATP binding; molecular_function	GO:0006468; protein phosphorylation; biological_process	GO:0004672; protein kinase activity; molecular_function
transcript_HQ_HBZL_transcript11508/f3p0/1925	4	GO:0055114; oxidation-reduction process; biological_process	GO:0016705; oxidoreductase activity, acting on paired donors, with incorporation or reduction of molecular oxygen; molecular_function	GO:0020037; heme binding; molecular_function	GO:0005506; iron ion binding; molecular_function
transcript_HQ_HBZL_transcript11509/f2p0/1937	1	GO:0003677; DNA binding; molecular_function
transcript_HQ_HBZL_transcript11510/f2p0/1923	3	GO:0008484; sulfuric ester hydrolase activity; molecular_function	GO:0008152; NA	GO:0003824; NA
transcript_HQ_HBZL_transcript11516/f3p0/1931	4	GO:0055114; oxidation-reduction process; biological_process	GO:0016705; oxidoreductase activity, acting on paired donors, with incorporation or reduction of molecular oxygen; molecular_function	GO:0005506; iron ion binding; molecular_function	GO:0020037; heme binding; molecular_function
transcript_HQ_HBZL_transcript11517/f7p0/1942	3	GO:0016491; oxidoreductase activity; molecular_function	GO:0005507; copper ion binding; molecular_function	GO:0055114; oxidation-reduction process; biological_process
transcript_HQ_HBZL_transcript11518/f15p0/1906	4	GO:0016491; oxidoreductase activity; molecular_function	GO:0051537; 2 iron, 2 sulfur cluster binding; molecular_function	GO:0010277; chlorophyllide a oxygenase [overall] activity; molecular_function	GO:0055114; oxidation-reduction process; biological_process
transcript_HQ_HBZL_transcript11519/f4p0/1918	4	GO:0006352; transcription initiation, DNA-dependent; biological_process	GO:0005634; nucleus; cellular_component	GO:0003677; DNA binding; molecular_function	GO:0051090; regulation of sequence-specific DNA binding transcription factor activity; biological_process
transcript_HQ_HBZL_transcript11520/f17p0/1893	3	GO:0004177; aminopeptidase activity; molecular_function	GO:0005622; intracellular; cellular_component	GO:0006508; proteolysis; biological_process
transcript_HQ_HBZL_transcript11521/f2p0/1943	9	GO:0005634; nucleus; cellular_component	GO:0006355; regulation of transcription, DNA-dependent; biological_process	GO:0043565; sequence-specific DNA binding; molecular_function	GO:0006891; intra-Golgi vesicle-mediated transport; biological_process	GO:0006260; DNA replication; biological_process	GO:0003677; DNA binding; molecular_function	GO:0003700; sequence-specific DNA binding transcription factor activity; molecular_function	GO:0030173; integral to Golgi membrane; cellular_component	GO:1901031; NA
transcript_HQ_HBZL_transcript11523/f3p0/1902	4	GO:0055085; transmembrane transport; biological_process	GO:0022857; transmembrane transporter activity; molecular_function	GO:0006810; transport; biological_process	GO:0016021; integral to membrane; cellular_component
transcript_HQ_HBZL_transcript11525/f2p0/1915	3	GO:0016485; protein processing; biological_process	GO:0016021; integral to membrane; cellular_component	GO:0004190; aspartic-type endopeptidase activity; molecular_function
transcript_HQ_HBZL_transcript11528/f9p0/1938	1	GO:0003676; nucleic acid binding; molecular_function
transcript_HQ_HBZL_transcript11530/f6p0/1924	1	GO:0008270; zinc ion binding; molecular_function
transcript_HQ_HBZL_transcript11531/f2p0/1922	5	GO:0003824; NA	GO:0006520; cellular amino acid metabolic process; biological_process	GO:0030170; pyridoxal phosphate binding; molecular_function	GO:0016829; lyase activity; molecular_function	GO:0009058; biosynthetic process; biological_process
transcript_HQ_HBZL_transcript11533/f14p0/1904	4	GO:0055114; oxidation-reduction process; biological_process	GO:0016705; oxidoreductase activity, acting on paired donors, with incorporation or reduction of molecular oxygen; molecular_function	GO:0005506; iron ion binding; molecular_function	GO:0020037; heme binding; molecular_function
transcript_HQ_HBZL_transcript11537/f15p0/1920	4	GO:0008152; NA	GO:0010333; terpene synthase activity; molecular_function	GO:0016829; lyase activity; molecular_function	GO:0000287; magnesium ion binding; molecular_function
transcript_HQ_HBZL_transcript11538/f5p0/1920	4	GO:0005506; iron ion binding; molecular_function	GO:0020037; heme binding; molecular_function	GO:0055114; oxidation-reduction process; biological_process	GO:0016705; oxidoreductase activity, acting on paired donors, with incorporation or reduction of molecular oxygen; molecular_function
transcript_HQ_HBZL_transcript1154/f10p0/3664	2	GO:0055114; oxidation-reduction process; biological_process	GO:0016491; oxidoreductase activity; molecular_function
transcript_HQ_HBZL_transcript11540/f2p0/1925	2	GO:0055085; transmembrane transport; biological_process	GO:0016021; integral to membrane; cellular_component
transcript_HQ_HBZL_transcript11541/f2p0/1937	5	GO:0004499; flavin-containing monooxygenase activity; molecular_function	GO:0055114; oxidation-reduction process; biological_process	GO:0050661; NADP binding; molecular_function	GO:0050660; flavin adenine dinucleotide binding; molecular_function	GO:0016491; oxidoreductase activity; molecular_function
transcript_HQ_HBZL_transcript11544/f2p0/1926	8	GO:0006397; mRNA processing; biological_process	GO:0005737; cytoplasm; cellular_component	GO:0000775; chromosome, centromeric region; cellular_component	GO:0005634; nucleus; cellular_component	GO:0005643; nuclear pore; cellular_component	GO:0003723; RNA binding; molecular_function	GO:0003682; chromatin binding; molecular_function	GO:0003677; DNA binding; molecular_function
transcript_HQ_HBZL_transcript11545/f2p0/1918	4	GO:0003676; nucleic acid binding; molecular_function	GO:0003677; DNA binding; molecular_function	GO:0016787; hydrolase activity; molecular_function	GO:0005524; ATP binding; molecular_function
transcript_HQ_HBZL_transcript11546/f2p0/1909	2	GO:0008375; acetylglucosaminyltransferase activity; molecular_function	GO:0006486; protein glycosylation; biological_process
transcript_HQ_HBZL_transcript11549/f28p0/1898	5	GO:0006468; protein phosphorylation; biological_process	GO:0016773; phosphotransferase activity, alcohol group as acceptor; molecular_function	GO:0004672; protein kinase activity; molecular_function	GO:0016020; membrane; cellular_component	GO:0005524; ATP binding; molecular_function
transcript_HQ_HBZL_transcript1155/f2p0/3653	5	GO:0005515; protein binding; molecular_function	GO:0016192; vesicle-mediated transport; biological_process	GO:0030131; clathrin adaptor complex; cellular_component	GO:0006886; intracellular protein transport; biological_process	GO:0030117; membrane coat; cellular_component
transcript_HQ_HBZL_transcript11550/f3p0/1935	6	GO:0003854; 3-beta-hydroxy-delta5-steroid dehydrogenase activity; molecular_function	GO:0003824; NA	GO:0016616; oxidoreductase activity, acting on the CH-OH group of donors, NAD or NADP as acceptor; molecular_function	GO:0055114; oxidation-reduction process; biological_process	GO:0006694; steroid biosynthetic process; biological_process	GO:0050662; coenzyme binding; molecular_function
transcript_HQ_HBZL_transcript11552/f2p0/1920	1	GO:0016491; oxidoreductase activity; molecular_function
transcript_HQ_HBZL_transcript11554/f15p0/1919	1	GO:0016765; transferase activity, transferring alkyl or aryl (other than methyl) groups; molecular_function
transcript_HQ_HBZL_transcript11555/f7p0/1935	3	GO:0016491; oxidoreductase activity; molecular_function	GO:0008152; NA	GO:0055114; oxidation-reduction process; biological_process
transcript_HQ_HBZL_transcript11559/f40p0/1892	4	GO:0005618; cell wall; cellular_component	GO:0030599; pectinesterase activity; molecular_function	GO:0004857; enzyme inhibitor activity; molecular_function	GO:0042545; cell wall modification; biological_process
transcript_HQ_HBZL_transcript1156/f2p0/3655	2	GO:0007010; cytoskeleton organization; biological_process	GO:0003779; actin binding; molecular_function
transcript_HQ_HBZL_transcript11560/f2p0/1920	2	GO:0045017; glycerolipid biosynthetic process; biological_process	GO:0004144; diacylglycerol O-acyltransferase activity; molecular_function
transcript_HQ_HBZL_transcript11561/f2p0/1989	1	GO:0005524; ATP binding; molecular_function
transcript_HQ_HBZL_transcript11564/f2p0/1924	1	GO:0016788; hydrolase activity, acting on ester bonds; molecular_function
transcript_HQ_HBZL_transcript1157/f3p0/3670	5	GO:0005515; protein binding; molecular_function	GO:0043531; ADP binding; molecular_function	GO:0005524; ATP binding; molecular_function	GO:0006468; protein phosphorylation; biological_process	GO:0004672; protein kinase activity; molecular_function
transcript_HQ_HBZL_transcript11570/f4p0/1928	3	GO:0020037; heme binding; molecular_function	GO:0004096; catalase activity; molecular_function	GO:0055114; oxidation-reduction process; biological_process
transcript_HQ_HBZL_transcript11572/f2p0/1937	5	GO:0004842; ubiquitin-protein ligase activity; molecular_function	GO:0046872; metal ion binding; molecular_function	GO:0005680; anaphase-promoting complex; cellular_component	GO:0005515; protein binding; molecular_function	GO:0008270; zinc ion binding; molecular_function
transcript_HQ_HBZL_transcript11576/f2p0/1912	2	GO:0005975; carbohydrate metabolic process; biological_process	GO:0016868; intramolecular transferase activity, phosphotransferases; molecular_function
transcript_HQ_HBZL_transcript11577/f3p0/1922	1	GO:0046983; protein dimerization activity; molecular_function
transcript_HQ_HBZL_transcript11581/f2p0/1948	4	GO:0006468; protein phosphorylation; biological_process	GO:0006914; autophagy; biological_process	GO:0004672; protein kinase activity; molecular_function	GO:0005524; ATP binding; molecular_function
transcript_HQ_HBZL_transcript11582/f6p0/1916	5	GO:0016020; membrane; cellular_component	GO:0004315; 3-oxoacyl-[acyl-carrier-protein] synthase activity; molecular_function	GO:0006633; fatty acid biosynthetic process; biological_process	GO:0005267; potassium channel activity; molecular_function	GO:0016747; transferase activity, transferring acyl groups other than amino-acyl groups; molecular_function
transcript_HQ_HBZL_transcript11583/f3p0/1927	5	GO:0016020; membrane; cellular_component	GO:0006855; drug transmembrane transport; biological_process	GO:0015297; antiporter activity; molecular_function	GO:0015238; drug transmembrane transporter activity; molecular_function	GO:0055085; transmembrane transport; biological_process
transcript_HQ_HBZL_transcript11584/f5p0/1937	4	GO:0004672; protein kinase activity; molecular_function	GO:0006468; protein phosphorylation; biological_process	GO:0005524; ATP binding; molecular_function	GO:0005515; protein binding; molecular_function
transcript_HQ_HBZL_transcript11587/f2p0/1927	1	GO:0015035; protein disulfide oxidoreductase activity; molecular_function
transcript_HQ_HBZL_transcript11588/f3p0/1895	1	GO:0016020; membrane; cellular_component
transcript_HQ_HBZL_transcript1159/f2p0/3640	4	GO:0001104; RNA polymerase II transcription cofactor activity; molecular_function	GO:0016592; mediator complex; cellular_component	GO:0006357; regulation of transcription from RNA polymerase II promoter; biological_process	GO:0005515; protein binding; molecular_function
transcript_HQ_HBZL_transcript11593/f16p0/1880	4	GO:0005524; ATP binding; molecular_function	GO:0005515; protein binding; molecular_function	GO:0004672; protein kinase activity; molecular_function	GO:0006468; protein phosphorylation; biological_process
transcript_HQ_HBZL_transcript11594/f6p0/1966	1	GO:0005096; GTPase activator activity; molecular_function
transcript_HQ_HBZL_transcript11599/f2p0/1907	3	GO:0004557; alpha-galactosidase activity; molecular_function	GO:0005975; carbohydrate metabolic process; biological_process	GO:0004553; hydrolase activity, hydrolyzing O-glycosyl compounds; molecular_function
transcript_HQ_HBZL_transcript116/f2p0/5748	16	GO:0016301; kinase activity; molecular_function	GO:0005525; GTP binding; molecular_function	GO:0055085; transmembrane transport; biological_process	GO:0016491; oxidoreductase activity; molecular_function	GO:0006810; transport; biological_process	GO:0005524; ATP binding; molecular_function	GO:0043531; ADP binding; molecular_function	GO:0098519; NA	GO:0055114; oxidation-reduction process; biological_process	GO:0016887; ATPase activity; molecular_function	GO:0016021; integral to membrane; cellular_component	GO:0003677; DNA binding; molecular_function	GO:0000166; nucleotide binding; molecular_function	GO:0042626; ATPase activity, coupled to transmembrane movement of substances; molecular_function	GO:0003924; GTPase activity; molecular_function	GO:0006777; Mo-molybdopterin cofactor biosynthetic process; biological_process
transcript_HQ_HBZL_transcript1160/f2p0/3649	3	GO:0016020; membrane; cellular_component	GO:0016780; phosphotransferase activity, for other substituted phosphate groups; molecular_function	GO:0008654; phospholipid biosynthetic process; biological_process
transcript_HQ_HBZL_transcript11600/f12p0/1802	1	GO:0016747; transferase activity, transferring acyl groups other than amino-acyl groups; molecular_function
transcript_HQ_HBZL_transcript11602/f2p0/1936	2	GO:0005509; calcium ion binding; molecular_function	GO:0005544; calcium-dependent phospholipid binding; molecular_function
transcript_HQ_HBZL_transcript11604/f2p0/1942	7	GO:0003924; GTPase activity; molecular_function	GO:0055114; oxidation-reduction process; biological_process	GO:0005525; GTP binding; molecular_function	GO:0005524; ATP binding; molecular_function	GO:0016765; transferase activity, transferring alkyl or aryl (other than methyl) groups; molecular_function	GO:0016491; oxidoreductase activity; molecular_function	GO:0006614; SRP-dependent cotranslational protein targeting to membrane; biological_process
transcript_HQ_HBZL_transcript11605/f2p0/1936	6	GO:0050662; coenzyme binding; molecular_function	GO:0006694; steroid biosynthetic process; biological_process	GO:0055114; oxidation-reduction process; biological_process	GO:0016616; oxidoreductase activity, acting on the CH-OH group of donors, NAD or NADP as acceptor; molecular_function	GO:0003824; NA	GO:0003854; 3-beta-hydroxy-delta5-steroid dehydrogenase activity; molecular_function
transcript_HQ_HBZL_transcript11606/f2p0/1910	4	GO:0016020; membrane; cellular_component	GO:0016021; integral to membrane; cellular_component	GO:0006810; transport; biological_process	GO:0055085; transmembrane transport; biological_process
transcript_HQ_HBZL_transcript11607/f2p0/1907	3	GO:0055114; oxidation-reduction process; biological_process	GO:0020037; heme binding; molecular_function	GO:0004096; catalase activity; molecular_function
transcript_HQ_HBZL_transcript11609/f2p0/1907	3	GO:0003676; nucleic acid binding; molecular_function	GO:0006810; transport; biological_process	GO:0005622; intracellular; cellular_component
transcript_HQ_HBZL_transcript1161/f5p0/3647	1	GO:0005515; protein binding; molecular_function
transcript_HQ_HBZL_transcript11610/f2p0/1937	2	GO:0016579; protein deubiquitination; biological_process	GO:0036459; NA
transcript_HQ_HBZL_transcript11611/f2p0/1917	1	GO:0003950; NAD+ ADP-ribosyltransferase activity; molecular_function
transcript_HQ_HBZL_transcript11617/f34p0/1880	3	GO:0055114; oxidation-reduction process; biological_process	GO:0004096; catalase activity; molecular_function	GO:0020037; heme binding; molecular_function
transcript_HQ_HBZL_transcript11619/f2p0/1908	4	GO:0005506; iron ion binding; molecular_function	GO:0020037; heme binding; molecular_function	GO:0016705; oxidoreductase activity, acting on paired donors, with incorporation or reduction of molecular oxygen; molecular_function	GO:0055114; oxidation-reduction process; biological_process
transcript_HQ_HBZL_transcript11624/f3p0/1997	1	GO:0005515; protein binding; molecular_function
transcript_HQ_HBZL_transcript11627/f5p0/1911	6	GO:0005524; ATP binding; molecular_function	GO:0016020; membrane; cellular_component	GO:0004672; protein kinase activity; molecular_function	GO:0007165; signal transduction; biological_process	GO:0006468; protein phosphorylation; biological_process	GO:0016773; phosphotransferase activity, alcohol group as acceptor; molecular_function
transcript_HQ_HBZL_transcript11628/f4p0/1863	4	GO:0030036; actin cytoskeleton organization; biological_process	GO:0017048; Rho GTPase binding; molecular_function	GO:0003779; actin binding; molecular_function	GO:0005515; protein binding; molecular_function
transcript_HQ_HBZL_transcript11633/f2p0/1898	2	GO:0016437; tRNA cytidylyltransferase activity; molecular_function	GO:0004810; tRNA adenylyltransferase activity; molecular_function
transcript_HQ_HBZL_transcript1164/f4p0/3682	3	GO:0005737; cytoplasm; cellular_component	GO:0005515; protein binding; molecular_function	GO:0008270; zinc ion binding; molecular_function
transcript_HQ_HBZL_transcript11644/f5p0/1917	1	GO:0016787; hydrolase activity; molecular_function
transcript_HQ_HBZL_transcript11646/f3p0/1912	2	GO:0015031; protein transport; biological_process	GO:0016020; membrane; cellular_component
transcript_HQ_HBZL_transcript11648/f2p0/1941	5	GO:0005680; anaphase-promoting complex; cellular_component	GO:0046872; metal ion binding; molecular_function	GO:0004842; ubiquitin-protein ligase activity; molecular_function	GO:0008270; zinc ion binding; molecular_function	GO:0005515; protein binding; molecular_function
transcript_HQ_HBZL_transcript11650/f3p0/1880	3	GO:0005515; protein binding; molecular_function	GO:0008270; zinc ion binding; molecular_function	GO:0005622; intracellular; cellular_component
transcript_HQ_HBZL_transcript11657/f2p0/1909	4	GO:0016705; oxidoreductase activity, acting on paired donors, with incorporation or reduction of molecular oxygen; molecular_function	GO:0055114; oxidation-reduction process; biological_process	GO:0020037; heme binding; molecular_function	GO:0005506; iron ion binding; molecular_function
transcript_HQ_HBZL_transcript11659/f2p0/1943	1	GO:0005515; protein binding; molecular_function
transcript_HQ_HBZL_transcript11661/f2p0/1919	1	GO:0010181; FMN binding; molecular_function
transcript_HQ_HBZL_transcript11662/f5p0/1902	2	GO:0005789; endoplasmic reticulum membrane; cellular_component	GO:0006396; RNA processing; biological_process
transcript_HQ_HBZL_transcript11663/f2p0/1904	4	GO:0016021; integral to membrane; cellular_component	GO:0022857; transmembrane transporter activity; molecular_function	GO:0055085; transmembrane transport; biological_process	GO:0006810; transport; biological_process
transcript_HQ_HBZL_transcript11664/f4p0/1900	2	GO:0008152; NA	GO:0003824; NA
transcript_HQ_HBZL_transcript11665/f4p0/1910	17	GO:0007030; Golgi organization; biological_process	GO:0008565; protein transporter activity; molecular_function	GO:0051258; protein polymerization; biological_process	GO:0000921; septin ring assembly; biological_process	GO:0005940; septin ring; cellular_component	GO:0030168; platelet activation; biological_process	GO:0030674; protein binding, bridging; molecular_function	GO:0006606; protein import into nucleus; biological_process	GO:0016020; membrane; cellular_component	GO:0005737; cytoplasm; cellular_component	GO:0006886; intracellular protein transport; biological_process	GO:0007130; synaptonemal complex assembly; biological_process	GO:0000795; synaptonemal complex; cellular_component	GO:0005102; receptor binding; molecular_function	GO:0016021; integral to membrane; cellular_component	GO:0007165; signal transduction; biological_process	GO:0005577; fibrinogen complex; cellular_component
transcript_HQ_HBZL_transcript11666/f2p0/1902	6	GO:0005524; ATP binding; molecular_function	GO:0009378; four-way junction helicase activity; molecular_function	GO:0005515; protein binding; molecular_function	GO:0006281; DNA repair; biological_process	GO:0006310; DNA recombination; biological_process	GO:0009379; Holliday junction helicase complex; cellular_component
transcript_HQ_HBZL_transcript11667/f3p0/1930	2	GO:0015031; protein transport; biological_process	GO:0016020; membrane; cellular_component
transcript_HQ_HBZL_transcript1167/f2p0/3621	1	GO:0003824; NA
transcript_HQ_HBZL_transcript11670/f4p0/1911	3	GO:0016021; integral to membrane; cellular_component	GO:0019236; response to pheromone; biological_process	GO:0007186; G-protein coupled receptor protein signaling pathway; biological_process
transcript_HQ_HBZL_transcript11671/f2p0/1915	1	GO:0003676; nucleic acid binding; molecular_function
transcript_HQ_HBZL_transcript11672/f2p0/1910	1	GO:0015066; alpha-amylase inhibitor activity; molecular_function
transcript_HQ_HBZL_transcript11673/f2p0/1904	5	GO:0036459; NA	GO:0070140; SUMO-specific isopeptidase activity; molecular_function	GO:0032183; SUMO binding; molecular_function	GO:0016579; protein deubiquitination; biological_process	GO:0005515; protein binding; molecular_function
transcript_HQ_HBZL_transcript11678/f3p0/1910	8	GO:0030117; membrane coat; cellular_component	GO:0006886; intracellular protein transport; biological_process	GO:0033588; Elongator holoenzyme complex; cellular_component	GO:0002098; tRNA wobble uridine modification; biological_process	GO:0005515; protein binding; molecular_function	GO:0005198; NA	GO:0006355; regulation of transcription, DNA-dependent; biological_process	GO:0016192; vesicle-mediated transport; biological_process
transcript_HQ_HBZL_transcript1168/f8p0/3647	1	GO:0003676; nucleic acid binding; molecular_function
transcript_HQ_HBZL_transcript11680/f3p0/1911	3	GO:0006520; cellular amino acid metabolic process; biological_process	GO:0030170; pyridoxal phosphate binding; molecular_function	GO:0016829; lyase activity; molecular_function
transcript_HQ_HBZL_transcript11681/f3p0/1900	4	GO:0055114; oxidation-reduction process; biological_process	GO:0016705; oxidoreductase activity, acting on paired donors, with incorporation or reduction of molecular oxygen; molecular_function	GO:0005506; iron ion binding; molecular_function	GO:0020037; heme binding; molecular_function
transcript_HQ_HBZL_transcript11682/f3p0/1928	3	GO:0016717; oxidoreductase activity, acting on paired donors, with oxidation of a pair of donors resulting in the reduction of molecular oxygen to two molecules of water; molecular_function	GO:0055114; oxidation-reduction process; biological_process	GO:0006629; lipid metabolic process; biological_process
transcript_HQ_HBZL_transcript11683/f2p0/1912	2	GO:0016790; thiolester hydrolase activity; molecular_function	GO:0006633; fatty acid biosynthetic process; biological_process
transcript_HQ_HBZL_transcript11685/f3p0/1904	3	GO:0004672; protein kinase activity; molecular_function	GO:0006468; protein phosphorylation; biological_process	GO:0005524; ATP binding; molecular_function
transcript_HQ_HBZL_transcript11688/f2p0/1901	3	GO:0008152; NA	GO:0055114; oxidation-reduction process; biological_process	GO:0016491; oxidoreductase activity; molecular_function
transcript_HQ_HBZL_transcript1169/f2p0/3677	2	GO:0005515; protein binding; molecular_function	GO:0006355; regulation of transcription, DNA-dependent; biological_process
transcript_HQ_HBZL_transcript11690/f2p0/1912	1	GO:0016021; integral to membrane; cellular_component
transcript_HQ_HBZL_transcript11699/f6p0/1927	2	GO:0016021; integral to membrane; cellular_component	GO:0006952; defense response; biological_process
transcript_HQ_HBZL_transcript11704/f29p0/1927	3	GO:0003700; sequence-specific DNA binding transcription factor activity; molecular_function	GO:0006355; regulation of transcription, DNA-dependent; biological_process	GO:0043565; sequence-specific DNA binding; molecular_function
transcript_HQ_HBZL_transcript11705/f19p0/1894	1	GO:0004781; sulfate adenylyltransferase (ATP) activity; molecular_function
transcript_HQ_HBZL_transcript11706/f4p0/1894	3	GO:0016021; integral to membrane; cellular_component	GO:0022857; transmembrane transporter activity; molecular_function	GO:0055085; transmembrane transport; biological_process
transcript_HQ_HBZL_transcript11711/f4p0/1903	1	GO:0005515; protein binding; molecular_function
transcript_HQ_HBZL_transcript11712/f2p0/1903	13	GO:0003677; DNA binding; molecular_function	GO:0006260; DNA replication; biological_process	GO:0008134; transcription factor binding; molecular_function	GO:0006310; DNA recombination; biological_process	GO:0016301; kinase activity; molecular_function	GO:0002949; NA	GO:0016787; hydrolase activity; molecular_function	GO:0006281; DNA repair; biological_process	GO:0006355; regulation of transcription, DNA-dependent; biological_process	GO:0003678; DNA helicase activity; molecular_function	GO:0005524; ATP binding; molecular_function	GO:0016887; ATPase activity; molecular_function	GO:0009378; four-way junction helicase activity; molecular_function
transcript_HQ_HBZL_transcript11715/f10p0/1887	4	GO:0005524; ATP binding; molecular_function	GO:0004672; protein kinase activity; molecular_function	GO:0005887; integral to plasma membrane; cellular_component	GO:0006468; protein phosphorylation; biological_process
transcript_HQ_HBZL_transcript11716/f3p0/1884	2	GO:0032266; phosphatidylinositol-3-phosphate binding; molecular_function	GO:0043130; ubiquitin binding; molecular_function
transcript_HQ_HBZL_transcript11717/f3p0/1919	3	GO:0016491; oxidoreductase activity; molecular_function	GO:0055114; oxidation-reduction process; biological_process	GO:0008152; NA
transcript_HQ_HBZL_transcript11729/f4p0/1928	1	GO:0046872; metal ion binding; molecular_function
transcript_HQ_HBZL_transcript1173/f8p0/3651	4	GO:0006468; protein phosphorylation; biological_process	GO:0004672; protein kinase activity; molecular_function	GO:0005515; protein binding; molecular_function	GO:0005524; ATP binding; molecular_function
transcript_HQ_HBZL_transcript11732/f2p0/1913	1	GO:0003676; nucleic acid binding; molecular_function
transcript_HQ_HBZL_transcript11734/f2p0/1906	5	GO:0016020; membrane; cellular_component	GO:0005524; ATP binding; molecular_function	GO:0006468; protein phosphorylation; biological_process	GO:0016773; phosphotransferase activity, alcohol group as acceptor; molecular_function	GO:0004672; protein kinase activity; molecular_function
transcript_HQ_HBZL_transcript11735/f2p0/1919	4	GO:0016705; oxidoreductase activity, acting on paired donors, with incorporation or reduction of molecular oxygen; molecular_function	GO:0055114; oxidation-reduction process; biological_process	GO:0020037; heme binding; molecular_function	GO:0005506; iron ion binding; molecular_function
transcript_HQ_HBZL_transcript11736/f2p0/1905	1	GO:0046872; metal ion binding; molecular_function
transcript_HQ_HBZL_transcript11739/f2p0/1920	2	GO:0016788; hydrolase activity, acting on ester bonds; molecular_function	GO:0009058; biosynthetic process; biological_process
transcript_HQ_HBZL_transcript11744/f8p0/1921	4	GO:0005524; ATP binding; molecular_function	GO:0005515; protein binding; molecular_function	GO:0004672; protein kinase activity; molecular_function	GO:0006468; protein phosphorylation; biological_process
transcript_HQ_HBZL_transcript11745/f3p0/1910	1	GO:0016787; hydrolase activity; molecular_function
transcript_HQ_HBZL_transcript11753/f2p0/1910	1	GO:0016740; transferase activity; molecular_function
transcript_HQ_HBZL_transcript11755/f4p0/1899	1	GO:0046872; metal ion binding; molecular_function
transcript_HQ_HBZL_transcript11756/f7p0/1898	2	GO:0008152; NA	GO:0016746; transferase activity, transferring acyl groups; molecular_function
transcript_HQ_HBZL_transcript11758/f2p0/1914	2	GO:0016021; integral to membrane; cellular_component	GO:0055085; transmembrane transport; biological_process
transcript_HQ_HBZL_transcript1176/f2p0/3708	5	GO:0007020; microtubule nucleation; biological_process	GO:0000226; microtubule cytoskeleton organization; biological_process	GO:0000922; spindle pole; cellular_component	GO:0043015; gamma-tubulin binding; molecular_function	GO:0005815; microtubule organizing center; cellular_component
transcript_HQ_HBZL_transcript11760/f3p0/1910	5	GO:0016021; integral to membrane; cellular_component	GO:0005515; protein binding; molecular_function	GO:0035444; nickel ion transmembrane transport; biological_process	GO:0046872; metal ion binding; molecular_function	GO:0015099; nickel ion transmembrane transporter activity; molecular_function
transcript_HQ_HBZL_transcript11761/f2p0/1898	4	GO:0005506; iron ion binding; molecular_function	GO:0020037; heme binding; molecular_function	GO:0016705; oxidoreductase activity, acting on paired donors, with incorporation or reduction of molecular oxygen; molecular_function	GO:0055114; oxidation-reduction process; biological_process
transcript_HQ_HBZL_transcript11762/f7p0/1832	4	GO:0020037; heme binding; molecular_function	GO:0005506; iron ion binding; molecular_function	GO:0016705; oxidoreductase activity, acting on paired donors, with incorporation or reduction of molecular oxygen; molecular_function	GO:0055114; oxidation-reduction process; biological_process
transcript_HQ_HBZL_transcript11766/f2p0/1938	9	GO:0016020; membrane; cellular_component	GO:0005578; proteinaceous extracellular matrix; cellular_component	GO:0007165; signal transduction; biological_process	GO:0006351; transcription, DNA-dependent; biological_process	GO:0003899; DNA-directed RNA polymerase activity; molecular_function	GO:0005515; protein binding; molecular_function	GO:0015159; polysaccharide transmembrane transporter activity; molecular_function	GO:0015774; polysaccharide transport; biological_process	GO:0005509; calcium ion binding; molecular_function
transcript_HQ_HBZL_transcript11769/f2p0/1910	3	GO:0005634; nucleus; cellular_component	GO:0003677; DNA binding; molecular_function	GO:0006355; regulation of transcription, DNA-dependent; biological_process
transcript_HQ_HBZL_transcript1177/f2p0/3639	4	GO:0004672; protein kinase activity; molecular_function	GO:0006468; protein phosphorylation; biological_process	GO:0005524; ATP binding; molecular_function	GO:0005515; protein binding; molecular_function
transcript_HQ_HBZL_transcript11774/f12p0/1903	1	GO:0003824; NA
transcript_HQ_HBZL_transcript11776/f2p0/1956	3	GO:0055114; oxidation-reduction process; biological_process	GO:0008152; NA	GO:0016491; oxidoreductase activity; molecular_function
transcript_HQ_HBZL_transcript11778/f2p0/1886	2	GO:0006556; S-adenosylmethionine biosynthetic process; biological_process	GO:0004478; methionine adenosyltransferase activity; molecular_function
transcript_HQ_HBZL_transcript1178/f10p0/3644	1	GO:0008152; NA
transcript_HQ_HBZL_transcript11780/f4p0/1897	5	GO:0016020; membrane; cellular_component	GO:0005524; ATP binding; molecular_function	GO:0016773; phosphotransferase activity, alcohol group as acceptor; molecular_function	GO:0006468; protein phosphorylation; biological_process	GO:0004672; protein kinase activity; molecular_function
transcript_HQ_HBZL_transcript11781/f2p0/1898	8	GO:0006281; DNA repair; biological_process	GO:0003724; RNA helicase activity; molecular_function	GO:0009378; four-way junction helicase activity; molecular_function	GO:0016887; ATPase activity; molecular_function	GO:0005524; ATP binding; molecular_function	GO:0006310; DNA recombination; biological_process	GO:0003723; RNA binding; molecular_function	GO:0005525; GTP binding; molecular_function
transcript_HQ_HBZL_transcript11782/f4p0/1905	3	GO:0008483; transaminase activity; molecular_function	GO:0030170; pyridoxal phosphate binding; molecular_function	GO:0009058; biosynthetic process; biological_process
transcript_HQ_HBZL_transcript11783/f10p0/1896	2	GO:0003676; nucleic acid binding; molecular_function	GO:0003723; RNA binding; molecular_function
transcript_HQ_HBZL_transcript11784/f7p0/1907	2	GO:0008152; NA	GO:0016746; transferase activity, transferring acyl groups; molecular_function
transcript_HQ_HBZL_transcript11786/f3p0/1887	2	GO:0016021; integral to membrane; cellular_component	GO:0016020; membrane; cellular_component
transcript_HQ_HBZL_transcript1179/f2p0/3659	2	GO:0008152; NA	GO:0016624; oxidoreductase activity, acting on the aldehyde or oxo group of donors, disulfide as acceptor; molecular_function
transcript_HQ_HBZL_transcript11791/f2p0/1906	6	GO:0006741; NADP biosynthetic process; biological_process	GO:0004143; diacylglycerol kinase activity; molecular_function	GO:0003951; NAD+ kinase activity; molecular_function	GO:0008152; NA	GO:0016301; kinase activity; molecular_function	GO:0007205; activation of protein kinase C activity by G-protein coupled receptor protein signaling pathway; biological_process
transcript_HQ_HBZL_transcript11792/f2p0/1902	1	GO:0003924; GTPase activity; molecular_function
transcript_HQ_HBZL_transcript11795/f2p0/1896	1	GO:0043565; sequence-specific DNA binding; molecular_function
transcript_HQ_HBZL_transcript11796/f2p0/1923	2	GO:0004358; glutamate N-acetyltransferase activity; molecular_function	GO:0006526; arginine biosynthetic process; biological_process
transcript_HQ_HBZL_transcript11797/f3p0/1902	4	GO:0005506; iron ion binding; molecular_function	GO:0020037; heme binding; molecular_function	GO:0055114; oxidation-reduction process; biological_process	GO:0016705; oxidoreductase activity, acting on paired donors, with incorporation or reduction of molecular oxygen; molecular_function
transcript_HQ_HBZL_transcript11798/f7p0/1934	13	GO:0001510; RNA methylation; biological_process	GO:0006400; tRNA modification; biological_process	GO:0032259; methylation; biological_process	GO:0009452; RNA capping; biological_process	GO:0009312; oligosaccharide biosynthetic process; biological_process	GO:0018024; histone-lysine N-methyltransferase activity; molecular_function	GO:0008171; O-methyltransferase activity; molecular_function	GO:0008757; S-adenosylmethionine-dependent methyltransferase activity; molecular_function	GO:0009877; nodulation; biological_process	GO:0008168; methyltransferase activity; molecular_function	GO:0008152; NA	GO:0006480; N-terminal protein amino acid methylation; biological_process	GO:0008176; tRNA (guanine-N7-)-methyltransferase activity; molecular_function
transcript_HQ_HBZL_transcript1180/f3p0/3626	4	GO:0019901; protein kinase binding; molecular_function	GO:0006355; regulation of transcription, DNA-dependent; biological_process	GO:0008289; lipid binding; molecular_function	GO:0003677; DNA binding; molecular_function
transcript_HQ_HBZL_transcript11805/f8p0/1889	1	GO:0003676; nucleic acid binding; molecular_function
transcript_HQ_HBZL_transcript11806/f2p0/1895	3	GO:0006890; retrograde vesicle-mediated transport, Golgi to ER; biological_process	GO:0004252; serine-type endopeptidase activity; molecular_function	GO:0016021; integral to membrane; cellular_component
transcript_HQ_HBZL_transcript11807/f4p0/1912	1	GO:0003676; nucleic acid binding; molecular_function
transcript_HQ_HBZL_transcript11808/f3p0/1934	1	GO:0005515; protein binding; molecular_function
transcript_HQ_HBZL_transcript1181/f2p0/3634	1	GO:0005515; protein binding; molecular_function
transcript_HQ_HBZL_transcript11813/f2p0/1892	1	GO:0003824; NA
transcript_HQ_HBZL_transcript11815/f20p0/1879	3	GO:0003743; translation initiation factor activity; molecular_function	GO:0005852; eukaryotic translation initiation factor 3 complex; cellular_component	GO:0005737; cytoplasm; cellular_component
transcript_HQ_HBZL_transcript11818/f2p0/1893	8	GO:0016020; membrane; cellular_component	GO:0043565; sequence-specific DNA binding; molecular_function	GO:0006355; regulation of transcription, DNA-dependent; biological_process	GO:0005801; cis-Golgi network; cellular_component	GO:0003677; DNA binding; molecular_function	GO:0003700; sequence-specific DNA binding transcription factor activity; molecular_function	GO:0007049; cell cycle; biological_process	GO:0006886; intracellular protein transport; biological_process
transcript_HQ_HBZL_transcript11819/f2p0/1910	4	GO:0016705; oxidoreductase activity, acting on paired donors, with incorporation or reduction of molecular oxygen; molecular_function	GO:0055114; oxidation-reduction process; biological_process	GO:0005506; iron ion binding; molecular_function	GO:0020037; heme binding; molecular_function
transcript_HQ_HBZL_transcript1182/f3p0/3647	1	GO:0005515; protein binding; molecular_function
transcript_HQ_HBZL_transcript11821/f2p0/1902	3	GO:0003676; nucleic acid binding; molecular_function	GO:0006139; nucleobase, nucleoside, nucleotide and nucleic acid metabolic process; biological_process	GO:0008408; 3'-5' exonuclease activity; molecular_function
transcript_HQ_HBZL_transcript11823/f5p0/1919	2	GO:0005092; GDP-dissociation inhibitor activity; molecular_function	GO:0007264; small GTPase mediated signal transduction; biological_process
transcript_HQ_HBZL_transcript11828/f3p0/1911	3	GO:0008270; zinc ion binding; molecular_function	GO:0005515; protein binding; molecular_function	GO:0046872; metal ion binding; molecular_function
transcript_HQ_HBZL_transcript1183/f3p0/3630	4	GO:0006886; intracellular protein transport; biological_process	GO:0008270; zinc ion binding; molecular_function	GO:0016192; vesicle-mediated transport; biological_process	GO:0005515; protein binding; molecular_function
transcript_HQ_HBZL_transcript11834/f2p0/1886	2	GO:0006952; defense response; biological_process	GO:0016021; integral to membrane; cellular_component
transcript_HQ_HBZL_transcript11836/f8p0/1882	2	GO:0008152; NA	GO:0016746; transferase activity, transferring acyl groups; molecular_function
transcript_HQ_HBZL_transcript11839/f2p0/1928	2	GO:0006886; intracellular protein transport; biological_process	GO:0005622; intracellular; cellular_component
transcript_HQ_HBZL_transcript11841/f3p0/1890	5	GO:0055114; oxidation-reduction process; biological_process	GO:0071949; FAD binding; molecular_function	GO:0008033; tRNA processing; biological_process	GO:0050660; flavin adenine dinucleotide binding; molecular_function	GO:0016491; oxidoreductase activity; molecular_function
transcript_HQ_HBZL_transcript11842/f2p0/1900	4	GO:0020037; heme binding; molecular_function	GO:0005506; iron ion binding; molecular_function	GO:0055114; oxidation-reduction process; biological_process	GO:0016705; oxidoreductase activity, acting on paired donors, with incorporation or reduction of molecular oxygen; molecular_function
transcript_HQ_HBZL_transcript11844/f13p0/1891	4	GO:0005524; ATP binding; molecular_function	GO:0005887; integral to plasma membrane; cellular_component	GO:0004672; protein kinase activity; molecular_function	GO:0006468; protein phosphorylation; biological_process
transcript_HQ_HBZL_transcript11853/f3p0/1836	6	GO:0005578; proteinaceous extracellular matrix; cellular_component	GO:0007165; signal transduction; biological_process	GO:0005509; calcium ion binding; molecular_function	GO:0001558; regulation of cell growth; biological_process	GO:0005520; insulin-like growth factor binding; molecular_function	GO:0005576; NA
transcript_HQ_HBZL_transcript11854/f3p0/1890	3	GO:0016020; membrane; cellular_component	GO:0005215; NA	GO:0006810; transport; biological_process
transcript_HQ_HBZL_transcript1186/f2p0/3642	1	GO:0035091; phosphatidylinositol binding; molecular_function
transcript_HQ_HBZL_transcript11863/f2p0/1936	1	GO:0005515; protein binding; molecular_function
transcript_HQ_HBZL_transcript11864/f14p0/1909	2	GO:0004553; hydrolase activity, hydrolyzing O-glycosyl compounds; molecular_function	GO:0005975; carbohydrate metabolic process; biological_process
transcript_HQ_HBZL_transcript11867/f2p0/1905	1	GO:0003824; NA
transcript_HQ_HBZL_transcript1187/f3p0/3646	11	GO:0004672; protein kinase activity; molecular_function	GO:0016020; membrane; cellular_component	GO:0055114; oxidation-reduction process; biological_process	GO:0009308; amine metabolic process; biological_process	GO:0030269; tetrahydromethanopterin S-methyltransferase activity; molecular_function	GO:0005524; ATP binding; molecular_function	GO:0006468; protein phosphorylation; biological_process	GO:0042597; periplasmic space; cellular_component	GO:0016638; oxidoreductase activity, acting on the CH-NH2 group of donors; molecular_function	GO:0005515; protein binding; molecular_function	GO:0015948; methanogenesis; biological_process
transcript_HQ_HBZL_transcript11872/f2p0/1882	8	GO:0005634; nucleus; cellular_component	GO:0006914; autophagy; biological_process	GO:0006355; regulation of transcription, DNA-dependent; biological_process	GO:0043565; sequence-specific DNA binding; molecular_function	GO:0003700; sequence-specific DNA binding transcription factor activity; molecular_function	GO:0003677; DNA binding; molecular_function	GO:0007049; cell cycle; biological_process	GO:0016021; integral to membrane; cellular_component
transcript_HQ_HBZL_transcript11874/f3p0/1902	5	GO:0005524; ATP binding; molecular_function	GO:0016020; membrane; cellular_component	GO:0004672; protein kinase activity; molecular_function	GO:0016773; phosphotransferase activity, alcohol group as acceptor; molecular_function	GO:0006468; protein phosphorylation; biological_process
transcript_HQ_HBZL_transcript11880/f2p0/1913	2	GO:0005643; nuclear pore; cellular_component	GO:0046907; intracellular transport; biological_process
transcript_HQ_HBZL_transcript11885/f2p0/1955	4	GO:0009584; detection of visible light; biological_process	GO:0046912; transferase activity, transferring acyl groups, acyl groups converted into alkyl on transfer; molecular_function	GO:0006355; regulation of transcription, DNA-dependent; biological_process	GO:0018298; protein-chromophore linkage; biological_process
transcript_HQ_HBZL_transcript11886/f23p0/1922	6	GO:0005622; intracellular; cellular_component	GO:0019074; viral RNA genome packaging; biological_process	GO:0019031; viral envelope; cellular_component	GO:0006810; transport; biological_process	GO:0019013; viral nucleocapsid; cellular_component	GO:0003676; nucleic acid binding; molecular_function
transcript_HQ_HBZL_transcript11887/f4p0/1898	2	GO:0005525; GTP binding; molecular_function	GO:0003924; GTPase activity; molecular_function
transcript_HQ_HBZL_transcript11888/f5p0/1897	1	GO:0016773; phosphotransferase activity, alcohol group as acceptor; molecular_function
transcript_HQ_HBZL_transcript1189/f9p0/3693	2	GO:0046872; metal ion binding; molecular_function	GO:0000166; nucleotide binding; molecular_function
transcript_HQ_HBZL_transcript11891/f15p0/1904	1	GO:0005524; ATP binding; molecular_function
transcript_HQ_HBZL_transcript11894/f3p0/1906	1	GO:0005515; protein binding; molecular_function
transcript_HQ_HBZL_transcript11898/f2p0/1907	2	GO:0006886; intracellular protein transport; biological_process	GO:0005622; intracellular; cellular_component
transcript_HQ_HBZL_transcript1190/f2p0/3653	2	GO:0004553; hydrolase activity, hydrolyzing O-glycosyl compounds; molecular_function	GO:0005975; carbohydrate metabolic process; biological_process
transcript_HQ_HBZL_transcript11903/f3p0/1899	1	GO:0003824; NA
transcript_HQ_HBZL_transcript11904/f4p0/1884	2	GO:0016021; integral to membrane; cellular_component	GO:0006952; defense response; biological_process
transcript_HQ_HBZL_transcript11905/f9p0/1876	19	GO:0019069; viral capsid assembly; biological_process	GO:0006914; autophagy; biological_process	GO:0005634; nucleus; cellular_component	GO:0016021; integral to membrane; cellular_component	GO:0006886; intracellular protein transport; biological_process	GO:0043093; cytokinesis by binary fission; biological_process	GO:0007049; cell cycle; biological_process	GO:0006260; DNA replication; biological_process	GO:0003677; DNA binding; molecular_function	GO:0003700; sequence-specific DNA binding transcription factor activity; molecular_function	GO:0006606; protein import into nucleus; biological_process	GO:0043565; sequence-specific DNA binding; molecular_function	GO:0070840; dynein complex binding; molecular_function	GO:0005737; cytoplasm; cellular_component	GO:0006355; regulation of transcription, DNA-dependent; biological_process	GO:0042803; protein homodimerization activity; molecular_function	GO:0005783; endoplasmic reticulum; cellular_component	GO:0008134; transcription factor binding; molecular_function	GO:0090529; NA
transcript_HQ_HBZL_transcript11906/f8p0/1894	1	GO:0005515; protein binding; molecular_function
transcript_HQ_HBZL_transcript11907/f2p0/1963	4	GO:0005634; nucleus; cellular_component	GO:0006417; regulation of translation; biological_process	GO:0045182; NA	GO:0051090; regulation of sequence-specific DNA binding transcription factor activity; biological_process
transcript_HQ_HBZL_transcript11910/f11p0/1879	2	GO:0008152; NA	GO:0003824; NA
transcript_HQ_HBZL_transcript11911/f7p0/1886	4	GO:0005515; protein binding; molecular_function	GO:0005524; ATP binding; molecular_function	GO:0006468; protein phosphorylation; biological_process	GO:0004672; protein kinase activity; molecular_function
transcript_HQ_HBZL_transcript11915/f2p0/1882	5	GO:0055085; transmembrane transport; biological_process	GO:0015238; drug transmembrane transporter activity; molecular_function	GO:0015297; antiporter activity; molecular_function	GO:0016020; membrane; cellular_component	GO:0006855; drug transmembrane transport; biological_process
transcript_HQ_HBZL_transcript11921/f2p0/1883	5	GO:0055085; transmembrane transport; biological_process	GO:0015238; drug transmembrane transporter activity; molecular_function	GO:0015297; antiporter activity; molecular_function	GO:0016020; membrane; cellular_component	GO:0006855; drug transmembrane transport; biological_process
transcript_HQ_HBZL_transcript11924/f2p0/1897	1	GO:0005515; protein binding; molecular_function
transcript_HQ_HBZL_transcript11925/f2p0/1900	3	GO:0006468; protein phosphorylation; biological_process	GO:0004672; protein kinase activity; molecular_function	GO:0005524; ATP binding; molecular_function
transcript_HQ_HBZL_transcript11926/f5p0/1917	5	GO:0006520; cellular amino acid metabolic process; biological_process	GO:0030170; pyridoxal phosphate binding; molecular_function	GO:0016829; lyase activity; molecular_function	GO:0016740; transferase activity; molecular_function	GO:0009058; biosynthetic process; biological_process
transcript_HQ_HBZL_transcript11931/f6p0/1919	2	GO:0016746; transferase activity, transferring acyl groups; molecular_function	GO:0008152; NA
transcript_HQ_HBZL_transcript11934/f2p0/1890	4	GO:0055114; oxidation-reduction process; biological_process	GO:0016705; oxidoreductase activity, acting on paired donors, with incorporation or reduction of molecular oxygen; molecular_function	GO:0005506; iron ion binding; molecular_function	GO:0020037; heme binding; molecular_function
transcript_HQ_HBZL_transcript11936/f4p0/1882	2	GO:0016787; hydrolase activity; molecular_function	GO:0008152; NA
transcript_HQ_HBZL_transcript1194/f2p0/3623	4	GO:0003777; microtubule motor activity; molecular_function	GO:0007018; microtubule-based movement; biological_process	GO:0008017; microtubule binding; molecular_function	GO:0005524; ATP binding; molecular_function
transcript_HQ_HBZL_transcript11941/f2p0/1884	1	GO:0005515; protein binding; molecular_function
transcript_HQ_HBZL_transcript11942/f10p0/1891	3	GO:0010181; FMN binding; molecular_function	GO:0055114; oxidation-reduction process; biological_process	GO:0016491; oxidoreductase activity; molecular_function
transcript_HQ_HBZL_transcript11943/f4p0/1908	1	GO:0003676; nucleic acid binding; molecular_function
transcript_HQ_HBZL_transcript11944/f5p0/1880	6	GO:0016021; integral to membrane; cellular_component	GO:0016020; membrane; cellular_component	GO:0005215; NA	GO:0022857; transmembrane transporter activity; molecular_function	GO:0055085; transmembrane transport; biological_process	GO:0006810; transport; biological_process
transcript_HQ_HBZL_transcript11945/f2p0/1908	1	GO:0005515; protein binding; molecular_function
transcript_HQ_HBZL_transcript11946/f2p0/1886	3	GO:0005524; ATP binding; molecular_function	GO:0006468; protein phosphorylation; biological_process	GO:0004672; protein kinase activity; molecular_function
transcript_HQ_HBZL_transcript11947/f2p0/1906	3	GO:0055085; transmembrane transport; biological_process	GO:0022857; transmembrane transporter activity; molecular_function	GO:0016021; integral to membrane; cellular_component
transcript_HQ_HBZL_transcript11948/f4p0/2001	1	GO:0003824; NA
transcript_HQ_HBZL_transcript11951/f3p0/1900	8	GO:0031683; G-protein beta/gamma-subunit complex binding; molecular_function	GO:0004871; signal transducer activity; molecular_function	GO:0019001; guanyl nucleotide binding; molecular_function	GO:0019083; viral transcription; biological_process	GO:0016301; kinase activity; molecular_function	GO:0007186; G-protein coupled receptor protein signaling pathway; biological_process	GO:0005524; ATP binding; molecular_function	GO:0003924; GTPase activity; molecular_function
transcript_HQ_HBZL_transcript11953/f3p0/1903	8	GO:0016020; membrane; cellular_component	GO:0005242; inward rectifier potassium channel activity; molecular_function	GO:0006811; ion transport; biological_process	GO:0016021; integral to membrane; cellular_component	GO:0006813; potassium ion transport; biological_process	GO:0005509; calcium ion binding; molecular_function	GO:0005216; ion channel activity; molecular_function	GO:0055085; transmembrane transport; biological_process
transcript_HQ_HBZL_transcript11955/f4p0/1913	6	GO:0016616; oxidoreductase activity, acting on the CH-OH group of donors, NAD or NADP as acceptor; molecular_function	GO:0003824; NA	GO:0003854; 3-beta-hydroxy-delta5-steroid dehydrogenase activity; molecular_function	GO:0050662; coenzyme binding; molecular_function	GO:0006694; steroid biosynthetic process; biological_process	GO:0055114; oxidation-reduction process; biological_process
transcript_HQ_HBZL_transcript11959/f2p0/1908	1	GO:0005515; protein binding; molecular_function
transcript_HQ_HBZL_transcript11960/f6p0/1838	1	GO:0046872; metal ion binding; molecular_function
transcript_HQ_HBZL_transcript11961/f2p0/1878	1	GO:0005515; protein binding; molecular_function
transcript_HQ_HBZL_transcript11964/f2p0/1885	2	GO:0005515; protein binding; molecular_function	GO:0009405; pathogenesis; biological_process
transcript_HQ_HBZL_transcript11965/f4p0/1896	1	GO:0005509; calcium ion binding; molecular_function
transcript_HQ_HBZL_transcript1197/f6p0/3661	4	GO:0006334; nucleosome assembly; biological_process	GO:0005634; nucleus; cellular_component	GO:0005815; microtubule organizing center; cellular_component	GO:0016817; hydrolase activity, acting on acid anhydrides; molecular_function
transcript_HQ_HBZL_transcript11975/f3p0/1898	5	GO:0005576; NA	GO:0009755; hormone-mediated signaling pathway; biological_process	GO:0005524; ATP binding; molecular_function	GO:0005184; neuropeptide hormone activity; molecular_function	GO:0003676; nucleic acid binding; molecular_function
transcript_HQ_HBZL_transcript11979/f4p0/1906	8	GO:0016616; oxidoreductase activity, acting on the CH-OH group of donors, NAD or NADP as acceptor; molecular_function	GO:0051287; NAD binding; molecular_function	GO:0003854; 3-beta-hydroxy-delta5-steroid dehydrogenase activity; molecular_function	GO:0050662; coenzyme binding; molecular_function	GO:0006694; steroid biosynthetic process; biological_process	GO:0055114; oxidation-reduction process; biological_process	GO:0016491; oxidoreductase activity; molecular_function	GO:0003824; NA
transcript_HQ_HBZL_transcript11984/f2p0/1880	7	GO:0005515; protein binding; molecular_function	GO:0005524; ATP binding; molecular_function	GO:0004803; transposase activity; molecular_function	GO:0006468; protein phosphorylation; biological_process	GO:0006313; transposition, DNA-mediated; biological_process	GO:0004672; protein kinase activity; molecular_function	GO:0003677; DNA binding; molecular_function
transcript_HQ_HBZL_transcript11987/f4p0/1931	4	GO:0008033; tRNA processing; biological_process	GO:0050660; flavin adenine dinucleotide binding; molecular_function	GO:0016491; oxidoreductase activity; molecular_function	GO:0055114; oxidation-reduction process; biological_process
transcript_HQ_HBZL_transcript11988/f2p0/1903	2	GO:0005634; nucleus; cellular_component	GO:0017025; TBP-class protein binding; molecular_function
transcript_HQ_HBZL_transcript11996/f2p0/1893	2	GO:0005789; endoplasmic reticulum membrane; cellular_component	GO:0006396; RNA processing; biological_process
transcript_HQ_HBZL_transcript11998/f3p0/1884	2	GO:0004553; hydrolase activity, hydrolyzing O-glycosyl compounds; molecular_function	GO:0005975; carbohydrate metabolic process; biological_process
transcript_HQ_HBZL_transcript12/f2p0/7491	6	GO:0000398; nuclear mRNA splicing, via spliceosome; biological_process	GO:0030623; U5 snRNA binding; molecular_function	GO:0017070; U6 snRNA binding; molecular_function	GO:0003723; RNA binding; molecular_function	GO:0005515; protein binding; molecular_function	GO:0000398; nuclear mRNA splicing, via spliceosome; biological_process
transcript_HQ_HBZL_transcript120/f2p0/5720	16	GO:0098519; NA	GO:0055114; oxidation-reduction process; biological_process	GO:0016887; ATPase activity; molecular_function	GO:0005524; ATP binding; molecular_function	GO:0043531; ADP binding; molecular_function	GO:0016301; kinase activity; molecular_function	GO:0005525; GTP binding; molecular_function	GO:0006810; transport; biological_process	GO:0016491; oxidoreductase activity; molecular_function	GO:0055085; transmembrane transport; biological_process	GO:0000166; nucleotide binding; molecular_function	GO:0042626; ATPase activity, coupled to transmembrane movement of substances; molecular_function	GO:0006777; Mo-molybdopterin cofactor biosynthetic process; biological_process	GO:0003924; GTPase activity; molecular_function	GO:0016021; integral to membrane; cellular_component	GO:0003677; DNA binding; molecular_function
transcript_HQ_HBZL_transcript1200/f2p0/3650	5	GO:0002161; aminoacyl-tRNA editing activity; molecular_function	GO:0000166; nucleotide binding; molecular_function	GO:0004812; aminoacyl-tRNA ligase activity; molecular_function	GO:0006418; tRNA aminoacylation for protein translation; biological_process	GO:0005524; ATP binding; molecular_function
transcript_HQ_HBZL_transcript12004/f3p0/1888	4	GO:0042545; cell wall modification; biological_process	GO:0004857; enzyme inhibitor activity; molecular_function	GO:0005618; cell wall; cellular_component	GO:0030599; pectinesterase activity; molecular_function
transcript_HQ_HBZL_transcript12007/f3p0/1888	2	GO:0031072; heat shock protein binding; molecular_function	GO:0051082; unfolded protein binding; molecular_function
transcript_HQ_HBZL_transcript12009/f2p0/1942	13	GO:0016616; oxidoreductase activity, acting on the CH-OH group of donors, NAD or NADP as acceptor; molecular_function	GO:0050660; flavin adenine dinucleotide binding; molecular_function	GO:0051287; NAD binding; molecular_function	GO:0008033; tRNA processing; biological_process	GO:0008677; 2-dehydropantoate 2-reductase activity; molecular_function	GO:0004506; squalene monooxygenase activity; molecular_function	GO:0055114; oxidation-reduction process; biological_process	GO:0003857; 3-hydroxyacyl-CoA dehydrogenase activity; molecular_function	GO:0046168; glycerol-3-phosphate catabolic process; biological_process	GO:0006631; fatty acid metabolic process; biological_process	GO:0016491; oxidoreductase activity; molecular_function	GO:0071949; FAD binding; molecular_function	GO:0016021; integral to membrane; cellular_component
transcript_HQ_HBZL_transcript1201/f2p0/3633	1	GO:0005515; protein binding; molecular_function
transcript_HQ_HBZL_transcript12013/f3p0/1881	1	GO:0008017; microtubule binding; molecular_function
transcript_HQ_HBZL_transcript12016/f3p0/1877	8	GO:0006413; translational initiation; biological_process	GO:0003824; NA	GO:0003743; translation initiation factor activity; molecular_function	GO:0006694; steroid biosynthetic process; biological_process	GO:0055114; oxidation-reduction process; biological_process	GO:0050662; coenzyme binding; molecular_function	GO:0003854; 3-beta-hydroxy-delta5-steroid dehydrogenase activity; molecular_function	GO:0016616; oxidoreductase activity, acting on the CH-OH group of donors, NAD or NADP as acceptor; molecular_function
transcript_HQ_HBZL_transcript12018/f3p0/1884	1	GO:0006508; proteolysis; biological_process
transcript_HQ_HBZL_transcript1202/f9p0/3672	7	GO:0030145; manganese ion binding; molecular_function	GO:0004842; ubiquitin-protein ligase activity; molecular_function	GO:0005515; protein binding; molecular_function	GO:0004721; phosphoprotein phosphatase activity; molecular_function	GO:0008270; zinc ion binding; molecular_function	GO:0000287; magnesium ion binding; molecular_function	GO:0016567; protein ubiquitination; biological_process
transcript_HQ_HBZL_transcript12023/f4p0/1877	4	GO:0008270; zinc ion binding; molecular_function	GO:0005515; protein binding; molecular_function	GO:0046872; metal ion binding; molecular_function	GO:0006281; DNA repair; biological_process
transcript_HQ_HBZL_transcript12029/f3p0/1856	2	GO:0005975; carbohydrate metabolic process; biological_process	GO:0016773; phosphotransferase activity, alcohol group as acceptor; molecular_function
transcript_HQ_HBZL_transcript12030/f3p0/1891	4	GO:0020037; heme binding; molecular_function	GO:0005506; iron ion binding; molecular_function	GO:0055114; oxidation-reduction process; biological_process	GO:0016705; oxidoreductase activity, acting on paired donors, with incorporation or reduction of molecular oxygen; molecular_function
transcript_HQ_HBZL_transcript12032/f6p0/1929	1	GO:0008430; selenium binding; molecular_function
transcript_HQ_HBZL_transcript12033/f2p0/1827	2	GO:0003779; actin binding; molecular_function	GO:0007010; cytoskeleton organization; biological_process
transcript_HQ_HBZL_transcript12034/f11p0/1878	2	GO:0006355; regulation of transcription, DNA-dependent; biological_process	GO:0003677; DNA binding; molecular_function
transcript_HQ_HBZL_transcript12036/f5p0/1887	4	GO:0006470; protein dephosphorylation; biological_process	GO:0004721; phosphoprotein phosphatase activity; molecular_function	GO:0008138; protein tyrosine/serine/threonine phosphatase activity; molecular_function	GO:0004725; protein tyrosine phosphatase activity; molecular_function
transcript_HQ_HBZL_transcript12040/f4p0/1900	4	GO:0005216; ion channel activity; molecular_function	GO:0055085; transmembrane transport; biological_process	GO:0016020; membrane; cellular_component	GO:0006811; ion transport; biological_process
transcript_HQ_HBZL_transcript12044/f7p0/1877	2	GO:0031072; heat shock protein binding; molecular_function	GO:0051082; unfolded protein binding; molecular_function
transcript_HQ_HBZL_transcript12046/f4p0/1879	2	GO:0006355; regulation of transcription, DNA-dependent; biological_process	GO:0003700; sequence-specific DNA binding transcription factor activity; molecular_function
transcript_HQ_HBZL_transcript12047/f3p0/1881	2	GO:0006486; protein glycosylation; biological_process	GO:0016757; transferase activity, transferring glycosyl groups; molecular_function
transcript_HQ_HBZL_transcript12048/f4p0/1878	4	GO:0005524; ATP binding; molecular_function	GO:0016787; hydrolase activity; molecular_function	GO:0003677; DNA binding; molecular_function	GO:0003676; nucleic acid binding; molecular_function
transcript_HQ_HBZL_transcript12050/f3p0/1878	1	GO:0005515; protein binding; molecular_function
transcript_HQ_HBZL_transcript12055/f2p0/1881	5	GO:0020037; heme binding; molecular_function	GO:0005506; iron ion binding; molecular_function	GO:0016705; oxidoreductase activity, acting on paired donors, with incorporation or reduction of molecular oxygen; molecular_function	GO:0055114; oxidation-reduction process; biological_process	GO:0005886; plasma membrane; cellular_component
transcript_HQ_HBZL_transcript1206/f2p0/3635	4	GO:0004812; aminoacyl-tRNA ligase activity; molecular_function	GO:0006418; tRNA aminoacylation for protein translation; biological_process	GO:0005524; ATP binding; molecular_function	GO:0000166; nucleotide binding; molecular_function
transcript_HQ_HBZL_transcript12062/f4p0/1884	2	GO:0006508; proteolysis; biological_process	GO:0008233; peptidase activity; molecular_function
transcript_HQ_HBZL_transcript12063/f2p0/1884	1	GO:0005886; plasma membrane; cellular_component
transcript_HQ_HBZL_transcript12066/f2p0/1877	1	GO:0005515; protein binding; molecular_function
transcript_HQ_HBZL_transcript12068/f2p0/1878	2	GO:0055114; oxidation-reduction process; biological_process	GO:0016491; oxidoreductase activity; molecular_function
transcript_HQ_HBZL_transcript12069/f5p0/1879	2	GO:0000272; polysaccharide catabolic process; biological_process	GO:0016161; beta-amylase activity; molecular_function
transcript_HQ_HBZL_transcript1207/f2p0/3629	7	GO:0051287; NAD binding; molecular_function	GO:0050660; flavin adenine dinucleotide binding; molecular_function	GO:0016491; oxidoreductase activity; molecular_function	GO:0008033; tRNA processing; biological_process	GO:0071949; FAD binding; molecular_function	GO:0005515; protein binding; molecular_function	GO:0055114; oxidation-reduction process; biological_process
transcript_HQ_HBZL_transcript12071/f2p0/1877	1	GO:0003677; DNA binding; molecular_function
transcript_HQ_HBZL_transcript12073/f9p0/1889	3	GO:0007186; G-protein coupled receptor protein signaling pathway; biological_process	GO:0016021; integral to membrane; cellular_component	GO:0019236; response to pheromone; biological_process
transcript_HQ_HBZL_transcript12074/f4p0/1913	4	GO:0016705; oxidoreductase activity, acting on paired donors, with incorporation or reduction of molecular oxygen; molecular_function	GO:0055114; oxidation-reduction process; biological_process	GO:0005506; iron ion binding; molecular_function	GO:0020037; heme binding; molecular_function
transcript_HQ_HBZL_transcript12076/f12p0/1866	4	GO:0030599; pectinesterase activity; molecular_function	GO:0005618; cell wall; cellular_component	GO:0042545; cell wall modification; biological_process	GO:0004857; enzyme inhibitor activity; molecular_function
transcript_HQ_HBZL_transcript12078/f4p0/1875	1	GO:0005515; protein binding; molecular_function
transcript_HQ_HBZL_transcript12079/f3p0/1879	5	GO:0015238; drug transmembrane transporter activity; molecular_function	GO:0055085; transmembrane transport; biological_process	GO:0006855; drug transmembrane transport; biological_process	GO:0016020; membrane; cellular_component	GO:0015297; antiporter activity; molecular_function
transcript_HQ_HBZL_transcript12080/f2p0/1898	1	GO:0005515; protein binding; molecular_function
transcript_HQ_HBZL_transcript12085/f2p0/1879	3	GO:0005524; ATP binding; molecular_function	GO:0006468; protein phosphorylation; biological_process	GO:0004672; protein kinase activity; molecular_function
transcript_HQ_HBZL_transcript12088/f16p0/1867	2	GO:0055085; transmembrane transport; biological_process	GO:0016021; integral to membrane; cellular_component
transcript_HQ_HBZL_transcript12089/f2p0/1877	4	GO:0020037; heme binding; molecular_function	GO:0005506; iron ion binding; molecular_function	GO:0016705; oxidoreductase activity, acting on paired donors, with incorporation or reduction of molecular oxygen; molecular_function	GO:0055114; oxidation-reduction process; biological_process
transcript_HQ_HBZL_transcript12090/f6p0/1873	3	GO:0008270; zinc ion binding; molecular_function	GO:0003676; nucleic acid binding; molecular_function	GO:0003723; RNA binding; molecular_function
transcript_HQ_HBZL_transcript12091/f4p0/1841	1	GO:0046872; metal ion binding; molecular_function
transcript_HQ_HBZL_transcript12094/f2p0/1875	1	GO:0005515; protein binding; molecular_function
transcript_HQ_HBZL_transcript12097/f2p0/1876	3	GO:0005524; ATP binding; molecular_function	GO:0004672; protein kinase activity; molecular_function	GO:0006468; protein phosphorylation; biological_process
transcript_HQ_HBZL_transcript12098/f4p0/1892	3	GO:0004930; G-protein coupled receptor activity; molecular_function	GO:0007186; G-protein coupled receptor protein signaling pathway; biological_process	GO:0016021; integral to membrane; cellular_component
transcript_HQ_HBZL_transcript121/f2p0/5697	2	GO:0005992; trehalose biosynthetic process; biological_process	GO:0003824; NA
transcript_HQ_HBZL_transcript1210/f3p0/3628	4	GO:0016779; nucleotidyltransferase activity; molecular_function	GO:0004652; polynucleotide adenylyltransferase activity; molecular_function	GO:0003723; RNA binding; molecular_function	GO:0043631; RNA polyadenylation; biological_process
transcript_HQ_HBZL_transcript12101/f177p0/1799	4	GO:0020037; heme binding; molecular_function	GO:0005506; iron ion binding; molecular_function	GO:0055114; oxidation-reduction process; biological_process	GO:0016705; oxidoreductase activity, acting on paired donors, with incorporation or reduction of molecular oxygen; molecular_function
transcript_HQ_HBZL_transcript12102/f3p0/1884	6	GO:0006914; autophagy; biological_process	GO:0006355; regulation of transcription, DNA-dependent; biological_process	GO:0009424; bacterial-type flagellum hook; cellular_component	GO:0003700; sequence-specific DNA binding transcription factor activity; molecular_function	GO:0006260; DNA replication; biological_process	GO:0043565; sequence-specific DNA binding; molecular_function
transcript_HQ_HBZL_transcript12104/f2p0/1882	1	GO:0007049; cell cycle; biological_process
transcript_HQ_HBZL_transcript12107/f2p0/1868	3	GO:0006810; transport; biological_process	GO:0005337; nucleoside transmembrane transporter activity; molecular_function	GO:0016021; integral to membrane; cellular_component
transcript_HQ_HBZL_transcript12109/f4p0/1918	1	GO:0006629; lipid metabolic process; biological_process
transcript_HQ_HBZL_transcript12111/f4p0/1877	3	GO:0055114; oxidation-reduction process; biological_process	GO:0006813; potassium ion transport; biological_process	GO:0051287; NAD binding; molecular_function
transcript_HQ_HBZL_transcript12113/f4p0/1879	7	GO:0015940; pantothenate biosynthetic process; biological_process	GO:0004592; pantoate-beta-alanine ligase activity; molecular_function	GO:0042128; nitrate assimilation; biological_process	GO:0009058; biosynthetic process; biological_process	GO:0003824; NA	GO:0003919; FMN adenylyltransferase activity; molecular_function	GO:0009231; riboflavin biosynthetic process; biological_process
transcript_HQ_HBZL_transcript12114/f4p0/1907	3	GO:0003676; nucleic acid binding; molecular_function	GO:0046872; metal ion binding; molecular_function	GO:0003723; RNA binding; molecular_function
transcript_HQ_HBZL_transcript12119/f5p0/1934	5	GO:0016020; membrane; cellular_component	GO:0005524; ATP binding; molecular_function	GO:0016773; phosphotransferase activity, alcohol group as acceptor; molecular_function	GO:0006468; protein phosphorylation; biological_process	GO:0004672; protein kinase activity; molecular_function
transcript_HQ_HBZL_transcript12121/f2p0/1872	1	GO:0015066; alpha-amylase inhibitor activity; molecular_function
transcript_HQ_HBZL_transcript12125/f3p0/1880	1	GO:0016831; carboxy-lyase activity; molecular_function
transcript_HQ_HBZL_transcript12127/f2p0/1880	3	GO:0006468; protein phosphorylation; biological_process	GO:0004672; protein kinase activity; molecular_function	GO:0005524; ATP binding; molecular_function
transcript_HQ_HBZL_transcript12128/f7p0/1872	3	GO:0016021; integral to membrane; cellular_component	GO:0016746; transferase activity, transferring acyl groups; molecular_function	GO:0008152; NA
transcript_HQ_HBZL_transcript12130/f2p0/1868	4	GO:0008270; zinc ion binding; molecular_function	GO:0005515; protein binding; molecular_function	GO:0061630; NA	GO:0046872; metal ion binding; molecular_function
transcript_HQ_HBZL_transcript12133/f2p0/1884	3	GO:0003924; GTPase activity; molecular_function	GO:0003993; acid phosphatase activity; molecular_function	GO:0046872; metal ion binding; molecular_function
transcript_HQ_HBZL_transcript12137/f2p0/1959	5	GO:0016020; membrane; cellular_component	GO:0006855; drug transmembrane transport; biological_process	GO:0015297; antiporter activity; molecular_function	GO:0015238; drug transmembrane transporter activity; molecular_function	GO:0055085; transmembrane transport; biological_process
transcript_HQ_HBZL_transcript1214/f3p0/3609	4	GO:0005515; protein binding; molecular_function	GO:0005524; ATP binding; molecular_function	GO:0006468; protein phosphorylation; biological_process	GO:0004672; protein kinase activity; molecular_function
transcript_HQ_HBZL_transcript12140/f2p0/1870	4	GO:0016829; lyase activity; molecular_function	GO:0000287; magnesium ion binding; molecular_function	GO:0008152; NA	GO:0010333; terpene synthase activity; molecular_function
transcript_HQ_HBZL_transcript12141/f4p0/1871	5	GO:0016491; oxidoreductase activity; molecular_function	GO:0050660; flavin adenine dinucleotide binding; molecular_function	GO:0008033; tRNA processing; biological_process	GO:0055114; oxidation-reduction process; biological_process	GO:0071949; FAD binding; molecular_function
transcript_HQ_HBZL_transcript12142/f4p0/1869	1	GO:0004781; sulfate adenylyltransferase (ATP) activity; molecular_function
transcript_HQ_HBZL_transcript12143/f6p0/1871	2	GO:0008152; NA	GO:0003824; NA
transcript_HQ_HBZL_transcript12149/f3p0/1855	5	GO:0015238; drug transmembrane transporter activity; molecular_function	GO:0055085; transmembrane transport; biological_process	GO:0006855; drug transmembrane transport; biological_process	GO:0016020; membrane; cellular_component	GO:0015297; antiporter activity; molecular_function
transcript_HQ_HBZL_transcript12152/f3p0/1887	2	GO:0045017; glycerolipid biosynthetic process; biological_process	GO:0004144; diacylglycerol O-acyltransferase activity; molecular_function
transcript_HQ_HBZL_transcript12153/f162p0/1838	4	GO:0051287; NAD binding; molecular_function	GO:0016616; oxidoreductase activity, acting on the CH-OH group of donors, NAD or NADP as acceptor; molecular_function	GO:0004616; phosphogluconate dehydrogenase (decarboxylating) activity; molecular_function	GO:0055114; oxidation-reduction process; biological_process
transcript_HQ_HBZL_transcript12158/f2p0/1867	4	GO:0004197; cysteine-type endopeptidase activity; molecular_function	GO:0006508; proteolysis; biological_process	GO:0050790; regulation of catalytic activity; biological_process	GO:0008234; cysteine-type peptidase activity; molecular_function
transcript_HQ_HBZL_transcript12160/f7p0/1871	6	GO:0004672; protein kinase activity; molecular_function	GO:0006468; protein phosphorylation; biological_process	GO:0007165; signal transduction; biological_process	GO:0016773; phosphotransferase activity, alcohol group as acceptor; molecular_function	GO:0005524; ATP binding; molecular_function	GO:0016020; membrane; cellular_component
transcript_HQ_HBZL_transcript12163/f3p0/1872	8	GO:0005634; nucleus; cellular_component	GO:0005944; 1-phosphatidylinositol-4-phosphate 3-kinase, class IB complex; cellular_component	GO:0046935; 1-phosphatidylinositol-3-kinase regulator activity; molecular_function	GO:0006270; DNA-dependent DNA replication initiation; biological_process	GO:0006367; transcription initiation from RNA polymerase II promoter; biological_process	GO:0003676; nucleic acid binding; molecular_function	GO:0003677; DNA binding; molecular_function	GO:0032968; positive regulation of transcription elongation from RNA polymerase II promoter; biological_process
transcript_HQ_HBZL_transcript12164/f2p0/1880	4	GO:0005634; nucleus; cellular_component	GO:0003677; DNA binding; molecular_function	GO:0009725; response to hormone stimulus; biological_process	GO:0006355; regulation of transcription, DNA-dependent; biological_process
transcript_HQ_HBZL_transcript12166/f2p0/1874	4	GO:0008152; NA	GO:0010333; terpene synthase activity; molecular_function	GO:0016829; lyase activity; molecular_function	GO:0000287; magnesium ion binding; molecular_function
transcript_HQ_HBZL_transcript12169/f2p0/1876	4	GO:0007275; multicellular organismal development; biological_process	GO:0008855; exodeoxyribonuclease VII activity; molecular_function	GO:0008053; mitochondrial fusion; biological_process	GO:0042600; chorion; cellular_component
transcript_HQ_HBZL_transcript12172/f251p0/1773	4	GO:0016705; oxidoreductase activity, acting on paired donors, with incorporation or reduction of molecular oxygen; molecular_function	GO:0055114; oxidation-reduction process; biological_process	GO:0005506; iron ion binding; molecular_function	GO:0020037; heme binding; molecular_function
transcript_HQ_HBZL_transcript12178/f2p0/1870	2	GO:0006508; proteolysis; biological_process	GO:0008233; peptidase activity; molecular_function
transcript_HQ_HBZL_transcript12179/f2p0/1886	3	GO:0016020; membrane; cellular_component	GO:0005215; NA	GO:0006810; transport; biological_process
transcript_HQ_HBZL_transcript12181/f2p0/1874	3	GO:0003723; RNA binding; molecular_function	GO:0006413; translational initiation; biological_process	GO:0003743; translation initiation factor activity; molecular_function
transcript_HQ_HBZL_transcript12182/f3p0/1873	2	GO:0016758; transferase activity, transferring hexosyl groups; molecular_function	GO:0008152; NA
transcript_HQ_HBZL_transcript12183/f3p0/1874	4	GO:0005506; iron ion binding; molecular_function	GO:0020037; heme binding; molecular_function	GO:0016705; oxidoreductase activity, acting on paired donors, with incorporation or reduction of molecular oxygen; molecular_function	GO:0055114; oxidation-reduction process; biological_process
transcript_HQ_HBZL_transcript12188/f2p0/1875	12	GO:0016773; phosphotransferase activity, alcohol group as acceptor; molecular_function	GO:0006468; protein phosphorylation; biological_process	GO:0004672; protein kinase activity; molecular_function	GO:0016020; membrane; cellular_component	GO:0005524; ATP binding; molecular_function	GO:0019064; viral envelope fusion with host membrane; biological_process	GO:0005524; ATP binding; molecular_function	GO:0046789; host cell surface receptor binding; molecular_function	GO:0019031; viral envelope; cellular_component	GO:0007165; signal transduction; biological_process	GO:0006468; protein phosphorylation; biological_process	GO:0004672; protein kinase activity; molecular_function
transcript_HQ_HBZL_transcript12190/f6p0/1894	4	GO:0055114; oxidation-reduction process; biological_process	GO:0051287; NAD binding; molecular_function	GO:0016616; oxidoreductase activity, acting on the CH-OH group of donors, NAD or NADP as acceptor; molecular_function	GO:0004616; phosphogluconate dehydrogenase (decarboxylating) activity; molecular_function
transcript_HQ_HBZL_transcript12191/f2p0/1905	1	GO:0003676; nucleic acid binding; molecular_function
transcript_HQ_HBZL_transcript12192/f4p0/1890	3	GO:0006468; protein phosphorylation; biological_process	GO:0004672; protein kinase activity; molecular_function	GO:0005524; ATP binding; molecular_function
transcript_HQ_HBZL_transcript12194/f4p0/1868	7	GO:0015979; photosynthesis; biological_process	GO:0004553; hydrolase activity, hydrolyzing O-glycosyl compounds; molecular_function	GO:0009523; photosystem II; cellular_component	GO:0005975; carbohydrate metabolic process; biological_process	GO:0050821; protein stabilization; biological_process	GO:0016020; membrane; cellular_component	GO:0042301; phosphate binding; molecular_function
transcript_HQ_HBZL_transcript12195/f2p0/1871	1	GO:0006659; phosphatidylserine biosynthetic process; biological_process
transcript_HQ_HBZL_transcript12197/f2p0/1875	5	GO:0004672; protein kinase activity; molecular_function	GO:0016773; phosphotransferase activity, alcohol group as acceptor; molecular_function	GO:0006468; protein phosphorylation; biological_process	GO:0005524; ATP binding; molecular_function	GO:0016020; membrane; cellular_component
transcript_HQ_HBZL_transcript12199/f4p0/1891	2	GO:0015031; protein transport; biological_process	GO:0006464; protein modification process; biological_process
transcript_HQ_HBZL_transcript12200/f9p0/1883	1	GO:0005634; nucleus; cellular_component
transcript_HQ_HBZL_transcript12203/f5p0/1891	3	GO:0003700; sequence-specific DNA binding transcription factor activity; molecular_function	GO:0006355; regulation of transcription, DNA-dependent; biological_process	GO:0043565; sequence-specific DNA binding; molecular_function
transcript_HQ_HBZL_transcript12206/f2p0/1870	3	GO:0055114; oxidation-reduction process; biological_process	GO:0008152; NA	GO:0016491; oxidoreductase activity; molecular_function
transcript_HQ_HBZL_transcript12207/f7p0/1851	1	GO:0005515; protein binding; molecular_function
transcript_HQ_HBZL_transcript12209/f2p0/1863	1	GO:0005515; protein binding; molecular_function
transcript_HQ_HBZL_transcript1221/f3p0/3665	1	GO:0005515; protein binding; molecular_function
transcript_HQ_HBZL_transcript12211/f2p0/1904	8	GO:0003855; 3-dehydroquinate dehydratase activity; molecular_function	GO:0055114; oxidation-reduction process; biological_process	GO:0004616; phosphogluconate dehydrogenase (decarboxylating) activity; molecular_function	GO:0008033; tRNA processing; biological_process	GO:0051287; NAD binding; molecular_function	GO:0050660; flavin adenine dinucleotide binding; molecular_function	GO:0004764; shikimate 5-dehydrogenase activity; molecular_function	GO:0016491; oxidoreductase activity; molecular_function
transcript_HQ_HBZL_transcript12214/f2p0/1876	2	GO:0003677; DNA binding; molecular_function	GO:0006352; transcription initiation, DNA-dependent; biological_process
transcript_HQ_HBZL_transcript12219/f2p0/1863	7	GO:0005515; protein binding; molecular_function	GO:0016620; oxidoreductase activity, acting on the aldehyde or oxo group of donors, NAD or NADP as acceptor; molecular_function	GO:0055114; oxidation-reduction process; biological_process	GO:0070402; NADPH binding; molecular_function	GO:0016491; oxidoreductase activity; molecular_function	GO:0051287; NAD binding; molecular_function	GO:0050661; NADP binding; molecular_function
transcript_HQ_HBZL_transcript1222/f7p0/3621	3	GO:0005524; ATP binding; molecular_function	GO:0004672; protein kinase activity; molecular_function	GO:0006468; protein phosphorylation; biological_process
transcript_HQ_HBZL_transcript12220/f4p0/1869	1	GO:0005525; GTP binding; molecular_function
transcript_HQ_HBZL_transcript12226/f2p0/1883	8	GO:0009007; site-specific DNA-methyltransferase (adenine-specific) activity; molecular_function	GO:0009452; RNA capping; biological_process	GO:0008033; tRNA processing; biological_process	GO:0032775; DNA methylation on adenine; biological_process	GO:0001510; RNA methylation; biological_process	GO:0004809; tRNA (guanine-N2-)-methyltransferase activity; molecular_function	GO:0003723; RNA binding; molecular_function	GO:0008168; methyltransferase activity; molecular_function
transcript_HQ_HBZL_transcript12229/f9p0/1867	4	GO:0005506; iron ion binding; molecular_function	GO:0020037; heme binding; molecular_function	GO:0016705; oxidoreductase activity, acting on paired donors, with incorporation or reduction of molecular oxygen; molecular_function	GO:0055114; oxidation-reduction process; biological_process
transcript_HQ_HBZL_transcript1223/f2p0/3612	2	GO:0005634; nucleus; cellular_component	GO:0051726; regulation of cell cycle; biological_process
transcript_HQ_HBZL_transcript12232/f4p0/1862	2	GO:0005515; protein binding; molecular_function	GO:0008270; zinc ion binding; molecular_function
transcript_HQ_HBZL_transcript12234/f2p0/1877	2	GO:0005515; protein binding; molecular_function	GO:0005096; GTPase activator activity; molecular_function
transcript_HQ_HBZL_transcript12239/f2p0/1887	3	GO:0046872; metal ion binding; molecular_function	GO:0008270; zinc ion binding; molecular_function	GO:0005515; protein binding; molecular_function
transcript_HQ_HBZL_transcript12257/f2p0/1863	4	GO:0005506; iron ion binding; molecular_function	GO:0020037; heme binding; molecular_function	GO:0055114; oxidation-reduction process; biological_process	GO:0016705; oxidoreductase activity, acting on paired donors, with incorporation or reduction of molecular oxygen; molecular_function
transcript_HQ_HBZL_transcript12258/f6p0/1959	3	GO:0006468; protein phosphorylation; biological_process	GO:0004672; protein kinase activity; molecular_function	GO:0005524; ATP binding; molecular_function
transcript_HQ_HBZL_transcript12262/f3p0/1862	2	GO:0055085; transmembrane transport; biological_process	GO:0016021; integral to membrane; cellular_component
transcript_HQ_HBZL_transcript12265/f2p0/1880	1	GO:0016788; hydrolase activity, acting on ester bonds; molecular_function
transcript_HQ_HBZL_transcript1227/f2p0/3658	2	GO:0003824; NA	GO:0005515; protein binding; molecular_function
transcript_HQ_HBZL_transcript12270/f6p0/1863	3	GO:0003677; DNA binding; molecular_function	GO:0005737; cytoplasm; cellular_component	GO:0008270; zinc ion binding; molecular_function
transcript_HQ_HBZL_transcript12275/f8p0/1865	3	GO:0015948; methanogenesis; biological_process	GO:0055114; oxidation-reduction process; biological_process	GO:0005525; GTP binding; molecular_function
transcript_HQ_HBZL_transcript12279/f20p0/1741	1	GO:0003924; GTPase activity; molecular_function
transcript_HQ_HBZL_transcript1228/f3p0/3607	2	GO:0016773; phosphotransferase activity, alcohol group as acceptor; molecular_function	GO:0005975; carbohydrate metabolic process; biological_process
transcript_HQ_HBZL_transcript12280/f5p0/1867	3	GO:0051287; NAD binding; molecular_function	GO:0055114; oxidation-reduction process; biological_process	GO:0006813; potassium ion transport; biological_process
transcript_HQ_HBZL_transcript12281/f5p0/1859	4	GO:0055114; oxidation-reduction process; biological_process	GO:0016705; oxidoreductase activity, acting on paired donors, with incorporation or reduction of molecular oxygen; molecular_function	GO:0005506; iron ion binding; molecular_function	GO:0020037; heme binding; molecular_function
transcript_HQ_HBZL_transcript12282/f2p0/1858	2	GO:0008270; zinc ion binding; molecular_function	GO:0003676; nucleic acid binding; molecular_function
transcript_HQ_HBZL_transcript12287/f2p0/1909	2	GO:0008375; acetylglucosaminyltransferase activity; molecular_function	GO:0016020; membrane; cellular_component
transcript_HQ_HBZL_transcript12291/f2p0/1868	13	GO:0008134; transcription factor binding; molecular_function	GO:0006310; DNA recombination; biological_process	GO:0003677; DNA binding; molecular_function	GO:0006260; DNA replication; biological_process	GO:0002949; NA	GO:0016301; kinase activity; molecular_function	GO:0006355; regulation of transcription, DNA-dependent; biological_process	GO:0006281; DNA repair; biological_process	GO:0016787; hydrolase activity; molecular_function	GO:0016887; ATPase activity; molecular_function	GO:0009378; four-way junction helicase activity; molecular_function	GO:0005524; ATP binding; molecular_function	GO:0003678; DNA helicase activity; molecular_function
transcript_HQ_HBZL_transcript12292/f2p0/1853	1	GO:0005524; ATP binding; molecular_function
transcript_HQ_HBZL_transcript12297/f2p0/1882	3	GO:0043565; sequence-specific DNA binding; molecular_function	GO:0006355; regulation of transcription, DNA-dependent; biological_process	GO:0003700; sequence-specific DNA binding transcription factor activity; molecular_function
transcript_HQ_HBZL_transcript12299/f9p0/1855	1	GO:0003333; amino acid transmembrane transport; biological_process
transcript_HQ_HBZL_transcript123/f2p0/5658	10	GO:0005515; protein binding; molecular_function	GO:0034597; phosphatidylinositol-4,5-bisphosphate 4-phosphatase activity; molecular_function	GO:0008270; zinc ion binding; molecular_function	GO:0046872; metal ion binding; molecular_function	GO:0003676; nucleic acid binding; molecular_function	GO:0006468; protein phosphorylation; biological_process	GO:0005524; ATP binding; molecular_function	GO:0046856; phosphatidylinositol dephosphorylation; biological_process	GO:0005634; nucleus; cellular_component	GO:0004672; protein kinase activity; molecular_function
transcript_HQ_HBZL_transcript12300/f3p0/1886	1	GO:0003924; GTPase activity; molecular_function
transcript_HQ_HBZL_transcript12301/f2p0/1876	1	GO:0003676; nucleic acid binding; molecular_function
transcript_HQ_HBZL_transcript12302/f2p0/1881	4	GO:0006352; transcription initiation, DNA-dependent; biological_process	GO:0006270; DNA-dependent DNA replication initiation; biological_process	GO:0005669; transcription factor TFIID complex; cellular_component	GO:0005515; protein binding; molecular_function
transcript_HQ_HBZL_transcript12304/f2p0/1855	6	GO:0016773; phosphotransferase activity, alcohol group as acceptor; molecular_function	GO:0006468; protein phosphorylation; biological_process	GO:0007165; signal transduction; biological_process	GO:0004672; protein kinase activity; molecular_function	GO:0016020; membrane; cellular_component	GO:0005524; ATP binding; molecular_function
transcript_HQ_HBZL_transcript12308/f6p0/1894	4	GO:0016747; transferase activity, transferring acyl groups other than amino-acyl groups; molecular_function	GO:0006633; fatty acid biosynthetic process; biological_process	GO:0004315; 3-oxoacyl-[acyl-carrier-protein] synthase activity; molecular_function	GO:0016020; membrane; cellular_component
transcript_HQ_HBZL_transcript12309/f16p0/1855	1	GO:0005515; protein binding; molecular_function
transcript_HQ_HBZL_transcript1231/f2p0/3600	2	GO:0006820; anion transport; biological_process	GO:0016021; integral to membrane; cellular_component
transcript_HQ_HBZL_transcript12310/f4p0/1854	2	GO:0018580; nitronate monooxygenase activity; molecular_function	GO:0055114; oxidation-reduction process; biological_process
transcript_HQ_HBZL_transcript12313/f2p0/1860	6	GO:0004672; protein kinase activity; molecular_function	GO:0007165; signal transduction; biological_process	GO:0006468; protein phosphorylation; biological_process	GO:0016773; phosphotransferase activity, alcohol group as acceptor; molecular_function	GO:0005524; ATP binding; molecular_function	GO:0016020; membrane; cellular_component
transcript_HQ_HBZL_transcript12315/f3p0/1854	1	GO:0046872; metal ion binding; molecular_function
transcript_HQ_HBZL_transcript12319/f4p0/1859	1	GO:0006629; lipid metabolic process; biological_process
transcript_HQ_HBZL_transcript1232/f3p0/3612	4	GO:0006886; intracellular protein transport; biological_process	GO:0030127; COPII vesicle coat; cellular_component	GO:0006888; ER to Golgi vesicle-mediated transport; biological_process	GO:0008270; zinc ion binding; molecular_function
transcript_HQ_HBZL_transcript12321/f4p0/1864	2	GO:0005975; carbohydrate metabolic process; biological_process	GO:0004553; hydrolase activity, hydrolyzing O-glycosyl compounds; molecular_function
transcript_HQ_HBZL_transcript12324/f4p0/1876	3	GO:0005507; copper ion binding; molecular_function	GO:0055114; oxidation-reduction process; biological_process	GO:0016491; oxidoreductase activity; molecular_function
transcript_HQ_HBZL_transcript12325/f2p0/1859	7	GO:0015238; drug transmembrane transporter activity; molecular_function	GO:0055085; transmembrane transport; biological_process	GO:0006855; drug transmembrane transport; biological_process	GO:0046740; spread of virus in host, cell to cell; biological_process	GO:0016020; membrane; cellular_component	GO:0016021; integral to membrane; cellular_component	GO:0015297; antiporter activity; molecular_function
transcript_HQ_HBZL_transcript12326/f11p0/1895	3	GO:0015926; glucosidase activity; molecular_function	GO:0005975; carbohydrate metabolic process; biological_process	GO:0004553; hydrolase activity, hydrolyzing O-glycosyl compounds; molecular_function
transcript_HQ_HBZL_transcript12327/f2p0/1865	2	GO:0015031; protein transport; biological_process	GO:0016020; membrane; cellular_component
transcript_HQ_HBZL_transcript1233/f3p0/3603	6	GO:0005515; protein binding; molecular_function	GO:0009584; detection of visible light; biological_process	GO:0000155; two-component sensor activity; molecular_function	GO:0018298; protein-chromophore linkage; biological_process	GO:0007165; signal transduction; biological_process	GO:0006355; regulation of transcription, DNA-dependent; biological_process
transcript_HQ_HBZL_transcript12332/f4p0/1861	2	GO:0016021; integral to membrane; cellular_component	GO:0016020; membrane; cellular_component
transcript_HQ_HBZL_transcript12333/f5p0/1852	4	GO:0006468; protein phosphorylation; biological_process	GO:0004672; protein kinase activity; molecular_function	GO:0005576; NA	GO:0005524; ATP binding; molecular_function
transcript_HQ_HBZL_transcript12335/f2p0/1869	1	GO:0033926; glycopeptide alpha-N-acetylgalactosaminidase activity; molecular_function
transcript_HQ_HBZL_transcript12342/f5p0/1878	4	GO:2001256; NA	GO:0006355; regulation of transcription, DNA-dependent; biological_process	GO:0003700; sequence-specific DNA binding transcription factor activity; molecular_function	GO:0030176; integral to endoplasmic reticulum membrane; cellular_component
transcript_HQ_HBZL_transcript12345/f9p0/1856	6	GO:0016055; Wnt receptor signaling pathway; biological_process	GO:0005515; protein binding; molecular_function	GO:0008270; zinc ion binding; molecular_function	GO:0046872; metal ion binding; molecular_function	GO:0005680; anaphase-promoting complex; cellular_component	GO:0004842; ubiquitin-protein ligase activity; molecular_function
transcript_HQ_HBZL_transcript12348/f2p0/1858	2	GO:0006486; protein glycosylation; biological_process	GO:0008373; sialyltransferase activity; molecular_function
transcript_HQ_HBZL_transcript12349/f3p0/1859	4	GO:0055114; oxidation-reduction process; biological_process	GO:0010277; chlorophyllide a oxygenase [overall] activity; molecular_function	GO:0016491; oxidoreductase activity; molecular_function	GO:0051537; 2 iron, 2 sulfur cluster binding; molecular_function
transcript_HQ_HBZL_transcript12350/f5p0/1853	5	GO:0009058; biosynthetic process; biological_process	GO:0016740; transferase activity; molecular_function	GO:0016829; lyase activity; molecular_function	GO:0030170; pyridoxal phosphate binding; molecular_function	GO:0006520; cellular amino acid metabolic process; biological_process
transcript_HQ_HBZL_transcript12356/f3p0/1859	4	GO:0055114; oxidation-reduction process; biological_process	GO:0016705; oxidoreductase activity, acting on paired donors, with incorporation or reduction of molecular oxygen; molecular_function	GO:0020037; heme binding; molecular_function	GO:0005506; iron ion binding; molecular_function
transcript_HQ_HBZL_transcript1236/f2p0/3627	10	GO:0006814; sodium ion transport; biological_process	GO:0055085; transmembrane transport; biological_process	GO:0005215; NA	GO:0006810; transport; biological_process	GO:0015655; alanine:sodium symporter activity; molecular_function	GO:0032328; alanine transport; biological_process	GO:0003333; amino acid transmembrane transport; biological_process	GO:0006811; ion transport; biological_process	GO:0015171; amino acid transmembrane transporter activity; molecular_function	GO:0016020; membrane; cellular_component
transcript_HQ_HBZL_transcript12362/f2p0/1860	19	GO:0016616; oxidoreductase activity, acting on the CH-OH group of donors, NAD or NADP as acceptor; molecular_function	GO:0050661; NADP binding; molecular_function	GO:0019354; siroheme biosynthetic process; biological_process	GO:0008677; 2-dehydropantoate 2-reductase activity; molecular_function	GO:0006779; porphyrin biosynthetic process; biological_process	GO:0009089; lysine biosynthetic process via diaminopimelate; biological_process	GO:0003857; 3-hydroxyacyl-CoA dehydrogenase activity; molecular_function	GO:0006631; fatty acid metabolic process; biological_process	GO:0033014; tetrapyrrole biosynthetic process; biological_process	GO:0006813; potassium ion transport; biological_process	GO:0004616; phosphogluconate dehydrogenase (decarboxylating) activity; molecular_function	GO:0051287; NAD binding; molecular_function	GO:0008883; glutamyl-tRNA reductase activity; molecular_function	GO:0008839; dihydrodipicolinate reductase activity; molecular_function	GO:0016620; oxidoreductase activity, acting on the aldehyde or oxo group of donors, NAD or NADP as acceptor; molecular_function	GO:0055114; oxidation-reduction process; biological_process	GO:0016491; oxidoreductase activity; molecular_function	GO:0008641; small protein activating enzyme activity; molecular_function	GO:0043115; precorrin-2 dehydrogenase activity; molecular_function
transcript_HQ_HBZL_transcript12363/f5p0/1844	8	GO:0009231; riboflavin biosynthetic process; biological_process	GO:0004592; pantoate-beta-alanine ligase activity; molecular_function	GO:0016020; membrane; cellular_component	GO:0003919; FMN adenylyltransferase activity; molecular_function	GO:0003824; NA	GO:0009058; biosynthetic process; biological_process	GO:0042128; nitrate assimilation; biological_process	GO:0015940; pantothenate biosynthetic process; biological_process
transcript_HQ_HBZL_transcript12364/f2p0/1859	5	GO:0005515; protein binding; molecular_function	GO:0008270; zinc ion binding; molecular_function	GO:0046872; metal ion binding; molecular_function	GO:0005680; anaphase-promoting complex; cellular_component	GO:0004842; ubiquitin-protein ligase activity; molecular_function
transcript_HQ_HBZL_transcript12366/f2p0/1873	1	GO:0003824; NA
transcript_HQ_HBZL_transcript12369/f3p0/1864	4	GO:0016705; oxidoreductase activity, acting on paired donors, with incorporation or reduction of molecular oxygen; molecular_function	GO:0055114; oxidation-reduction process; biological_process	GO:0005506; iron ion binding; molecular_function	GO:0020037; heme binding; molecular_function
transcript_HQ_HBZL_transcript1237/f2p0/3591	2	GO:0008152; NA	GO:0003824; NA
transcript_HQ_HBZL_transcript12372/f3p0/1864	6	GO:0008270; zinc ion binding; molecular_function	GO:0000775; chromosome, centromeric region; cellular_component	GO:0003677; DNA binding; molecular_function	GO:0005634; nucleus; cellular_component	GO:0006270; DNA-dependent DNA replication initiation; biological_process	GO:0003682; chromatin binding; molecular_function
transcript_HQ_HBZL_transcript12375/f2p0/1856	4	GO:0043565; sequence-specific DNA binding; molecular_function	GO:0006355; regulation of transcription, DNA-dependent; biological_process	GO:0003677; DNA binding; molecular_function	GO:0003700; sequence-specific DNA binding transcription factor activity; molecular_function
transcript_HQ_HBZL_transcript12377/f2p0/1875	4	GO:0016021; integral to membrane; cellular_component	GO:0055114; oxidation-reduction process; biological_process	GO:0050660; flavin adenine dinucleotide binding; molecular_function	GO:0016491; oxidoreductase activity; molecular_function
transcript_HQ_HBZL_transcript12379/f3p0/1856	1	GO:0005515; protein binding; molecular_function
transcript_HQ_HBZL_transcript1238/f13p0/3624	2	GO:0008152; NA	GO:0016624; oxidoreductase activity, acting on the aldehyde or oxo group of donors, disulfide as acceptor; molecular_function
transcript_HQ_HBZL_transcript12381/f10p0/1883	2	GO:0016757; transferase activity, transferring glycosyl groups; molecular_function	GO:0016021; integral to membrane; cellular_component
transcript_HQ_HBZL_transcript12384/f3p0/1887	4	GO:0005524; ATP binding; molecular_function	GO:0004672; protein kinase activity; molecular_function	GO:0006468; protein phosphorylation; biological_process	GO:0006950; response to stress; biological_process
transcript_HQ_HBZL_transcript12386/f2p0/1856	4	GO:0020037; heme binding; molecular_function	GO:0005506; iron ion binding; molecular_function	GO:0016705; oxidoreductase activity, acting on paired donors, with incorporation or reduction of molecular oxygen; molecular_function	GO:0055114; oxidation-reduction process; biological_process
transcript_HQ_HBZL_transcript12389/f2p0/1840	3	GO:0003697; single-stranded DNA binding; molecular_function	GO:0006281; DNA repair; biological_process	GO:0005524; ATP binding; molecular_function
transcript_HQ_HBZL_transcript12390/f2p0/1879	1	GO:0016747; transferase activity, transferring acyl groups other than amino-acyl groups; molecular_function
transcript_HQ_HBZL_transcript12392/f2p0/1854	1	GO:0016788; hydrolase activity, acting on ester bonds; molecular_function
transcript_HQ_HBZL_transcript12394/f2p0/1870	6	GO:0016021; integral to membrane; cellular_component	GO:0016020; membrane; cellular_component	GO:0006810; transport; biological_process	GO:0005215; NA	GO:0022857; transmembrane transporter activity; molecular_function	GO:0055085; transmembrane transport; biological_process
transcript_HQ_HBZL_transcript12396/f2p0/1854	4	GO:0046872; metal ion binding; molecular_function	GO:0050992; dimethylallyl diphosphate biosynthetic process; biological_process	GO:0051745; 4-hydroxy-3-methylbut-2-en-1-yl diphosphate reductase activity; molecular_function	GO:0019288; isopentenyl diphosphate biosynthetic process, mevalonate-independent pathway; biological_process
transcript_HQ_HBZL_transcript12397/f2p0/1861	4	GO:0016491; oxidoreductase activity; molecular_function	GO:0005092; GDP-dissociation inhibitor activity; molecular_function	GO:0055114; oxidation-reduction process; biological_process	GO:0007264; small GTPase mediated signal transduction; biological_process
transcript_HQ_HBZL_transcript1240/f7p0/3589	4	GO:0005524; ATP binding; molecular_function	GO:0005515; protein binding; molecular_function	GO:0004672; protein kinase activity; molecular_function	GO:0006468; protein phosphorylation; biological_process
transcript_HQ_HBZL_transcript12402/f4p0/1862	1	GO:0005515; protein binding; molecular_function
transcript_HQ_HBZL_transcript12403/f2p0/1870	1	GO:0006508; proteolysis; biological_process
transcript_HQ_HBZL_transcript12404/f2p0/1857	2	GO:0006508; proteolysis; biological_process	GO:0004185; serine-type carboxypeptidase activity; molecular_function
transcript_HQ_HBZL_transcript12405/f2p0/1864	3	GO:0005622; intracellular; cellular_component	GO:0008270; zinc ion binding; molecular_function	GO:0005515; protein binding; molecular_function
transcript_HQ_HBZL_transcript12408/f2p0/1851	4	GO:0006468; protein phosphorylation; biological_process	GO:0004672; protein kinase activity; molecular_function	GO:0005887; integral to plasma membrane; cellular_component	GO:0005524; ATP binding; molecular_function
transcript_HQ_HBZL_transcript12411/f2p0/1863	2	GO:0003700; sequence-specific DNA binding transcription factor activity; molecular_function	GO:0006355; regulation of transcription, DNA-dependent; biological_process
transcript_HQ_HBZL_transcript12415/f2p0/1865	2	GO:0005515; protein binding; molecular_function	GO:0006323; DNA packaging; biological_process
transcript_HQ_HBZL_transcript12419/f2p0/1871	1	GO:0016747; transferase activity, transferring acyl groups other than amino-acyl groups; molecular_function
transcript_HQ_HBZL_transcript1242/f10p0/3594	7	GO:0009055; NA	GO:0005509; calcium ion binding; molecular_function	GO:0004601; peroxidase activity; molecular_function	GO:0016491; oxidoreductase activity; molecular_function	GO:0050664; oxidoreductase activity, acting on NADH or NADPH, oxygen as acceptor; molecular_function	GO:0055114; oxidation-reduction process; biological_process	GO:0016021; integral to membrane; cellular_component
transcript_HQ_HBZL_transcript12422/f2p0/1862	3	GO:0005743; mitochondrial inner membrane; cellular_component	GO:0005515; protein binding; molecular_function	GO:0004129; cytochrome-c oxidase activity; molecular_function
transcript_HQ_HBZL_transcript12424/f4p0/1848	3	GO:0005525; GTP binding; molecular_function	GO:0055114; oxidation-reduction process; biological_process	GO:0015948; methanogenesis; biological_process
transcript_HQ_HBZL_transcript12425/f2p0/1851	6	GO:0016787; hydrolase activity; molecular_function	GO:0003677; DNA binding; molecular_function	GO:0003676; nucleic acid binding; molecular_function	GO:0019079; viral genome replication; biological_process	GO:0008026; ATP-dependent helicase activity; molecular_function	GO:0005524; ATP binding; molecular_function
transcript_HQ_HBZL_transcript12427/f2p0/1827	3	GO:0016491; oxidoreductase activity; molecular_function	GO:0008641; small protein activating enzyme activity; molecular_function	GO:0055114; oxidation-reduction process; biological_process
transcript_HQ_HBZL_transcript12430/f2p0/1864	1	GO:0007165; signal transduction; biological_process
transcript_HQ_HBZL_transcript12433/f3p0/1850	2	GO:0004478; methionine adenosyltransferase activity; molecular_function	GO:0006556; S-adenosylmethionine biosynthetic process; biological_process
transcript_HQ_HBZL_transcript12436/f3p0/1737	7	GO:0020037; heme binding; molecular_function	GO:0030145; manganese ion binding; molecular_function	GO:0005506; iron ion binding; molecular_function	GO:0016705; oxidoreductase activity, acting on paired donors, with incorporation or reduction of molecular oxygen; molecular_function	GO:0055114; oxidation-reduction process; biological_process	GO:0000287; magnesium ion binding; molecular_function	GO:0004721; phosphoprotein phosphatase activity; molecular_function
transcript_HQ_HBZL_transcript12437/f8p0/1828	3	GO:0005524; ATP binding; molecular_function	GO:0006468; protein phosphorylation; biological_process	GO:0004672; protein kinase activity; molecular_function
transcript_HQ_HBZL_transcript12438/f2p0/1866	1	GO:0005515; protein binding; molecular_function
transcript_HQ_HBZL_transcript1244/f2p0/3594	1	GO:0016779; nucleotidyltransferase activity; molecular_function
transcript_HQ_HBZL_transcript12442/f2p0/1854	1	GO:0005515; protein binding; molecular_function
transcript_HQ_HBZL_transcript12444/f2p0/1923	3	GO:0009607; response to biotic stimulus; biological_process	GO:0006355; regulation of transcription, DNA-dependent; biological_process	GO:0005634; nucleus; cellular_component
transcript_HQ_HBZL_transcript12447/f3p0/1861	3	GO:0008152; NA	GO:0055114; oxidation-reduction process; biological_process	GO:0016491; oxidoreductase activity; molecular_function
transcript_HQ_HBZL_transcript12448/f3p0/1853	1	GO:0005515; protein binding; molecular_function
transcript_HQ_HBZL_transcript1245/f2p0/3590	1	GO:0003677; DNA binding; molecular_function
transcript_HQ_HBZL_transcript12451/f3p0/1822	1	GO:0005515; protein binding; molecular_function
transcript_HQ_HBZL_transcript12453/f3p0/1855	1	GO:0008430; selenium binding; molecular_function
transcript_HQ_HBZL_transcript12456/f8p0/1848	9	GO:0009116; nucleoside metabolic process; biological_process	GO:0005524; ATP binding; molecular_function	GO:0004140; dephospho-CoA kinase activity; molecular_function	GO:0016301; kinase activity; molecular_function	GO:0004127; cytidylate kinase activity; molecular_function	GO:0006139; nucleobase, nucleoside, nucleotide and nucleic acid metabolic process; biological_process	GO:0008152; NA	GO:0006810; transport; biological_process	GO:0015937; coenzyme A biosynthetic process; biological_process
transcript_HQ_HBZL_transcript12460/f4p0/1849	3	GO:0005672; transcription factor TFIIA complex; cellular_component	GO:0006367; transcription initiation from RNA polymerase II promoter; biological_process	GO:0005515; protein binding; molecular_function
transcript_HQ_HBZL_transcript12461/f2p0/1855	10	GO:0003333; amino acid transmembrane transport; biological_process	GO:0016020; membrane; cellular_component	GO:0055085; transmembrane transport; biological_process	GO:0015171; amino acid transmembrane transporter activity; molecular_function	GO:0006810; transport; biological_process	GO:0055085; transmembrane transport; biological_process	GO:0006810; transport; biological_process	GO:0015171; amino acid transmembrane transporter activity; molecular_function	GO:0003333; amino acid transmembrane transport; biological_process	GO:0016020; membrane; cellular_component
transcript_HQ_HBZL_transcript1247/f3p0/3602	2	GO:0016491; oxidoreductase activity; molecular_function	GO:0055114; oxidation-reduction process; biological_process
transcript_HQ_HBZL_transcript12473/f2p0/1868	4	GO:0005506; iron ion binding; molecular_function	GO:0020037; heme binding; molecular_function	GO:0016705; oxidoreductase activity, acting on paired donors, with incorporation or reduction of molecular oxygen; molecular_function	GO:0055114; oxidation-reduction process; biological_process
transcript_HQ_HBZL_transcript12476/f4p0/1863	3	GO:0004672; protein kinase activity; molecular_function	GO:0006468; protein phosphorylation; biological_process	GO:0005524; ATP binding; molecular_function
transcript_HQ_HBZL_transcript12483/f28p0/1834	2	GO:0006355; regulation of transcription, DNA-dependent; biological_process	GO:0003700; sequence-specific DNA binding transcription factor activity; molecular_function
transcript_HQ_HBZL_transcript12485/f2p0/1794	4	GO:0055114; oxidation-reduction process; biological_process	GO:0016705; oxidoreductase activity, acting on paired donors, with incorporation or reduction of molecular oxygen; molecular_function	GO:0005506; iron ion binding; molecular_function	GO:0020037; heme binding; molecular_function
transcript_HQ_HBZL_transcript12487/f7p0/1848	1	GO:0003924; GTPase activity; molecular_function
transcript_HQ_HBZL_transcript12488/f2p0/1845	1	GO:0005515; protein binding; molecular_function
transcript_HQ_HBZL_transcript12489/f13p0/1854	2	GO:0015031; protein transport; biological_process	GO:0016020; membrane; cellular_component
transcript_HQ_HBZL_transcript12490/f84p0/1802	4	GO:0055114; oxidation-reduction process; biological_process	GO:0016705; oxidoreductase activity, acting on paired donors, with incorporation or reduction of molecular oxygen; molecular_function	GO:0020037; heme binding; molecular_function	GO:0005506; iron ion binding; molecular_function
transcript_HQ_HBZL_transcript12497/f7p0/1944	2	GO:0004107; chorismate synthase activity; molecular_function	GO:0009073; aromatic amino acid family biosynthetic process; biological_process
transcript_HQ_HBZL_transcript12501/f4p0/1870	2	GO:0016790; thiolester hydrolase activity; molecular_function	GO:0006633; fatty acid biosynthetic process; biological_process
transcript_HQ_HBZL_transcript12503/f5p0/1779	2	GO:0016787; hydrolase activity; molecular_function	GO:0008152; NA
transcript_HQ_HBZL_transcript12504/f2p0/1879	1	GO:0005524; ATP binding; molecular_function
transcript_HQ_HBZL_transcript12509/f2p0/1844	3	GO:0004781; sulfate adenylyltransferase (ATP) activity; molecular_function	GO:0003824; NA	GO:0009058; biosynthetic process; biological_process
transcript_HQ_HBZL_transcript1251/f4p0/3593	1	GO:0005515; protein binding; molecular_function
transcript_HQ_HBZL_transcript12513/f3p0/1838	3	GO:0042025; host cell nucleus; cellular_component	GO:0005096; GTPase activator activity; molecular_function	GO:0019031; viral envelope; cellular_component
transcript_HQ_HBZL_transcript12516/f6p0/1861	2	GO:0003779; actin binding; molecular_function	GO:0007010; cytoskeleton organization; biological_process
transcript_HQ_HBZL_transcript12524/f3p0/1858	6	GO:0005524; ATP binding; molecular_function	GO:0016787; hydrolase activity; molecular_function	GO:0003677; DNA binding; molecular_function	GO:0003676; nucleic acid binding; molecular_function	GO:0019079; viral genome replication; biological_process	GO:0008026; ATP-dependent helicase activity; molecular_function
transcript_HQ_HBZL_transcript12525/f2p0/1849	5	GO:0071555; cell wall organization; biological_process	GO:0016021; integral to membrane; cellular_component	GO:0000155; two-component sensor activity; molecular_function	GO:0004673; protein histidine kinase activity; molecular_function	GO:0000160; two-component signal transduction system (phosphorelay); biological_process
transcript_HQ_HBZL_transcript12526/f2p0/1850	1	GO:0008270; zinc ion binding; molecular_function
transcript_HQ_HBZL_transcript12527/f3p0/1851	1	GO:0016021; integral to membrane; cellular_component
transcript_HQ_HBZL_transcript12528/f3p0/1833	2	GO:0005515; protein binding; molecular_function	GO:0008270; zinc ion binding; molecular_function
transcript_HQ_HBZL_transcript12529/f13p0/1842	5	GO:0008218; bioluminescence; biological_process	GO:0016491; oxidoreductase activity; molecular_function	GO:0008152; NA	GO:0003995; acyl-CoA dehydrogenase activity; molecular_function	GO:0055114; oxidation-reduction process; biological_process
transcript_HQ_HBZL_transcript12532/f9p0/1859	4	GO:0016705; oxidoreductase activity, acting on paired donors, with incorporation or reduction of molecular oxygen; molecular_function	GO:0055114; oxidation-reduction process; biological_process	GO:0020037; heme binding; molecular_function	GO:0005506; iron ion binding; molecular_function
transcript_HQ_HBZL_transcript12538/f4p0/1851	10	GO:0016616; oxidoreductase activity, acting on the CH-OH group of donors, NAD or NADP as acceptor; molecular_function	GO:0008033; tRNA processing; biological_process	GO:0051287; NAD binding; molecular_function	GO:0050660; flavin adenine dinucleotide binding; molecular_function	GO:0055114; oxidation-reduction process; biological_process	GO:0006631; fatty acid metabolic process; biological_process	GO:0003857; 3-hydroxyacyl-CoA dehydrogenase activity; molecular_function	GO:0045454; cell redox homeostasis; biological_process	GO:0016491; oxidoreductase activity; molecular_function	GO:0071949; FAD binding; molecular_function
transcript_HQ_HBZL_transcript12541/f2p0/1849	1	GO:0005515; protein binding; molecular_function
transcript_HQ_HBZL_transcript12546/f13p0/1839	1	GO:0005515; protein binding; molecular_function
transcript_HQ_HBZL_transcript12547/f3p0/1844	4	GO:0055114; oxidation-reduction process; biological_process	GO:0016705; oxidoreductase activity, acting on paired donors, with incorporation or reduction of molecular oxygen; molecular_function	GO:0005506; iron ion binding; molecular_function	GO:0020037; heme binding; molecular_function
transcript_HQ_HBZL_transcript12548/f2p0/1844	1	GO:0005515; protein binding; molecular_function
transcript_HQ_HBZL_transcript1255/f2p0/3597	2	GO:0003824; NA	GO:0005992; trehalose biosynthetic process; biological_process
transcript_HQ_HBZL_transcript12552/f2p0/1843	4	GO:0016705; oxidoreductase activity, acting on paired donors, with incorporation or reduction of molecular oxygen; molecular_function	GO:0055114; oxidation-reduction process; biological_process	GO:0005506; iron ion binding; molecular_function	GO:0020037; heme binding; molecular_function
transcript_HQ_HBZL_transcript12553/f2p0/1851	5	GO:0051287; NAD binding; molecular_function	GO:0004764; shikimate 5-dehydrogenase activity; molecular_function	GO:0003855; 3-dehydroquinate dehydratase activity; molecular_function	GO:0055114; oxidation-reduction process; biological_process	GO:0016153; urocanate hydratase activity; molecular_function
transcript_HQ_HBZL_transcript12556/f2p0/1842	1	GO:0000902; cell morphogenesis; biological_process
transcript_HQ_HBZL_transcript12559/f2p0/1817	8	GO:0003677; DNA binding; molecular_function	GO:0003700; sequence-specific DNA binding transcription factor activity; molecular_function	GO:0005634; nucleus; cellular_component	GO:0031514; motile cilium; cellular_component	GO:0006914; autophagy; biological_process	GO:0006355; regulation of transcription, DNA-dependent; biological_process	GO:0043565; sequence-specific DNA binding; molecular_function	GO:0048870; cell motility; biological_process
transcript_HQ_HBZL_transcript1256/f2p0/3658	1	GO:0005515; protein binding; molecular_function
transcript_HQ_HBZL_transcript12561/f2p0/1849	6	GO:0004672; protein kinase activity; molecular_function	GO:0003676; nucleic acid binding; molecular_function	GO:0006468; protein phosphorylation; biological_process	GO:0016773; phosphotransferase activity, alcohol group as acceptor; molecular_function	GO:0005524; ATP binding; molecular_function	GO:0016020; membrane; cellular_component
transcript_HQ_HBZL_transcript12565/f2p0/1917	6	GO:0019013; viral nucleocapsid; cellular_component	GO:0003676; nucleic acid binding; molecular_function	GO:0019074; viral RNA genome packaging; biological_process	GO:0019031; viral envelope; cellular_component	GO:0006810; transport; biological_process	GO:0005622; intracellular; cellular_component
transcript_HQ_HBZL_transcript12566/f2p0/1840	2	GO:0008375; acetylglucosaminyltransferase activity; molecular_function	GO:0016020; membrane; cellular_component
transcript_HQ_HBZL_transcript12568/f5p0/1849	3	GO:0055085; transmembrane transport; biological_process	GO:0016021; integral to membrane; cellular_component	GO:0016020; membrane; cellular_component
transcript_HQ_HBZL_transcript12569/f2p0/1867	10	GO:0043565; sequence-specific DNA binding; molecular_function	GO:0045893; positive regulation of transcription, DNA-dependent; biological_process	GO:0006355; regulation of transcription, DNA-dependent; biological_process	GO:0005634; nucleus; cellular_component	GO:0016829; lyase activity; molecular_function	GO:0008152; NA	GO:0006351; transcription, DNA-dependent; biological_process	GO:0042025; host cell nucleus; cellular_component	GO:0003677; DNA binding; molecular_function	GO:0003700; sequence-specific DNA binding transcription factor activity; molecular_function
transcript_HQ_HBZL_transcript12571/f2p0/1847	3	GO:0016779; nucleotidyltransferase activity; molecular_function	GO:0004810; tRNA adenylyltransferase activity; molecular_function	GO:0016437; tRNA cytidylyltransferase activity; molecular_function
transcript_HQ_HBZL_transcript12573/f2p0/1823	1	GO:0003676; nucleic acid binding; molecular_function
transcript_HQ_HBZL_transcript12574/f2p0/1836	2	GO:0030170; pyridoxal phosphate binding; molecular_function	GO:0009058; biosynthetic process; biological_process
transcript_HQ_HBZL_transcript12575/f2p0/1841	8	GO:0004871; signal transducer activity; molecular_function	GO:0031683; G-protein beta/gamma-subunit complex binding; molecular_function	GO:0007186; G-protein coupled receptor protein signaling pathway; biological_process	GO:0016301; kinase activity; molecular_function	GO:0019083; viral transcription; biological_process	GO:0019001; guanyl nucleotide binding; molecular_function	GO:0003924; GTPase activity; molecular_function	GO:0005524; ATP binding; molecular_function
transcript_HQ_HBZL_transcript12577/f10p0/1865	3	GO:0006468; protein phosphorylation; biological_process	GO:0004672; protein kinase activity; molecular_function	GO:0005524; ATP binding; molecular_function
transcript_HQ_HBZL_transcript12579/f6p0/1862	3	GO:0005524; ATP binding; molecular_function	GO:0006468; protein phosphorylation; biological_process	GO:0004672; protein kinase activity; molecular_function
transcript_HQ_HBZL_transcript12580/f2p0/1806	3	GO:0016020; membrane; cellular_component	GO:0005215; NA	GO:0006810; transport; biological_process
transcript_HQ_HBZL_transcript12582/f2p0/1846	4	GO:0006464; protein modification process; biological_process	GO:0051082; unfolded protein binding; molecular_function	GO:0031072; heat shock protein binding; molecular_function	GO:0016151; nickel ion binding; molecular_function
transcript_HQ_HBZL_transcript12584/f3p0/1882	1	GO:0017025; TBP-class protein binding; molecular_function
transcript_HQ_HBZL_transcript12586/f2p0/1842	2	GO:0016021; integral to membrane; cellular_component	GO:0055085; transmembrane transport; biological_process
transcript_HQ_HBZL_transcript12587/f2p0/1876	2	GO:0055114; oxidation-reduction process; biological_process	GO:0016702; oxidoreductase activity, acting on single donors with incorporation of molecular oxygen, incorporation of two atoms of oxygen; molecular_function
transcript_HQ_HBZL_transcript12590/f2p0/1760	4	GO:0004842; ubiquitin-protein ligase activity; molecular_function	GO:0016567; protein ubiquitination; biological_process	GO:0008270; zinc ion binding; molecular_function	GO:0005515; protein binding; molecular_function
transcript_HQ_HBZL_transcript12591/f2p0/1921	1	GO:0003824; NA
transcript_HQ_HBZL_transcript12593/f8p0/1838	4	GO:0020037; heme binding; molecular_function	GO:0005506; iron ion binding; molecular_function	GO:0055114; oxidation-reduction process; biological_process	GO:0016705; oxidoreductase activity, acting on paired donors, with incorporation or reduction of molecular oxygen; molecular_function
transcript_HQ_HBZL_transcript12597/f3p0/1838	4	GO:0020037; heme binding; molecular_function	GO:0005506; iron ion binding; molecular_function	GO:0016705; oxidoreductase activity, acting on paired donors, with incorporation or reduction of molecular oxygen; molecular_function	GO:0055114; oxidation-reduction process; biological_process
transcript_HQ_HBZL_transcript1260/f2p0/3601	1	GO:0003676; nucleic acid binding; molecular_function
transcript_HQ_HBZL_transcript12600/f6p0/1825	1	GO:0016301; kinase activity; molecular_function
transcript_HQ_HBZL_transcript12602/f8p0/1842	2	GO:0000272; polysaccharide catabolic process; biological_process	GO:0016161; beta-amylase activity; molecular_function
transcript_HQ_HBZL_transcript12603/f2p0/1853	9	GO:0005515; protein binding; molecular_function	GO:0044780; NA	GO:0043093; cytokinesis by binary fission; biological_process	GO:0090529; NA	GO:0048193; Golgi vesicle transport; biological_process	GO:0048870; cell motility; biological_process	GO:0016020; membrane; cellular_component	GO:0005737; cytoplasm; cellular_component	GO:0031514; motile cilium; cellular_component
transcript_HQ_HBZL_transcript12604/f9p0/1876	3	GO:0008152; NA	GO:0055114; oxidation-reduction process; biological_process	GO:0016491; oxidoreductase activity; molecular_function
transcript_HQ_HBZL_transcript12609/f2p0/1856	5	GO:0015238; drug transmembrane transporter activity; molecular_function	GO:0055085; transmembrane transport; biological_process	GO:0016020; membrane; cellular_component	GO:0006855; drug transmembrane transport; biological_process	GO:0015297; antiporter activity; molecular_function
transcript_HQ_HBZL_transcript1261/f2p0/3589	1	GO:0005515; protein binding; molecular_function
transcript_HQ_HBZL_transcript12610/f9p0/1844	4	GO:0016491; oxidoreductase activity; molecular_function	GO:0051537; 2 iron, 2 sulfur cluster binding; molecular_function	GO:0010277; chlorophyllide a oxygenase [overall] activity; molecular_function	GO:0055114; oxidation-reduction process; biological_process
transcript_HQ_HBZL_transcript12613/f2p0/1834	3	GO:0006468; protein phosphorylation; biological_process	GO:0004672; protein kinase activity; molecular_function	GO:0005524; ATP binding; molecular_function
transcript_HQ_HBZL_transcript12614/f21p0/1841	4	GO:0006520; cellular amino acid metabolic process; biological_process	GO:0009058; biosynthetic process; biological_process	GO:0016829; lyase activity; molecular_function	GO:0030170; pyridoxal phosphate binding; molecular_function
transcript_HQ_HBZL_transcript1262/f7p0/3535	3	GO:0005524; ATP binding; molecular_function	GO:0004672; protein kinase activity; molecular_function	GO:0006468; protein phosphorylation; biological_process
transcript_HQ_HBZL_transcript12621/f4p0/1841	2	GO:0004560; alpha-L-fucosidase activity; molecular_function	GO:0005975; carbohydrate metabolic process; biological_process
transcript_HQ_HBZL_transcript12622/f3p0/1838	4	GO:0016670; oxidoreductase activity, acting on a sulfur group of donors, oxygen as acceptor; molecular_function	GO:0016491; oxidoreductase activity; molecular_function	GO:0030328; prenylcysteine catabolic process; biological_process	GO:0055114; oxidation-reduction process; biological_process
transcript_HQ_HBZL_transcript12625/f2p0/1863	1	GO:0030682; evasion or tolerance of host defense response; biological_process
transcript_HQ_HBZL_transcript12629/f2p0/1865	5	GO:0016020; membrane; cellular_component	GO:0005524; ATP binding; molecular_function	GO:0016773; phosphotransferase activity, alcohol group as acceptor; molecular_function	GO:0006468; protein phosphorylation; biological_process	GO:0004672; protein kinase activity; molecular_function
transcript_HQ_HBZL_transcript12630/f4p0/1845	12	GO:0006520; cellular amino acid metabolic process; biological_process	GO:0046168; glycerol-3-phosphate catabolic process; biological_process	GO:0004553; hydrolase activity, hydrolyzing O-glycosyl compounds; molecular_function	GO:0016491; oxidoreductase activity; molecular_function	GO:0005882; intermediate filament; cellular_component	GO:0005200; structural constituent of cytoskeleton; molecular_function	GO:0016616; oxidoreductase activity, acting on the CH-OH group of donors, NAD or NADP as acceptor; molecular_function	GO:0051287; NAD binding; molecular_function	GO:0008839; dihydrodipicolinate reductase activity; molecular_function	GO:0005975; carbohydrate metabolic process; biological_process	GO:0009089; lysine biosynthetic process via diaminopimelate; biological_process	GO:0055114; oxidation-reduction process; biological_process
transcript_HQ_HBZL_transcript12631/f2p0/1865	3	GO:0042802; identical protein binding; molecular_function	GO:0043015; gamma-tubulin binding; molecular_function	GO:0005515; protein binding; molecular_function
transcript_HQ_HBZL_transcript12632/f3p0/1700	1	GO:0008430; selenium binding; molecular_function
transcript_HQ_HBZL_transcript12633/f2p0/1852	1	GO:0008430; selenium binding; molecular_function
transcript_HQ_HBZL_transcript12635/f2p0/1834	3	GO:0008484; sulfuric ester hydrolase activity; molecular_function	GO:0008152; NA	GO:0003824; NA
transcript_HQ_HBZL_transcript12636/f3p0/1857	1	GO:0005515; protein binding; molecular_function
transcript_HQ_HBZL_transcript12637/f4p0/1852	7	GO:0004635; phosphoribosyl-AMP cyclohydrolase activity; molecular_function	GO:0055114; oxidation-reduction process; biological_process	GO:0000105; histidine biosynthetic process; biological_process	GO:0051539; 4 iron, 4 sulfur cluster binding; molecular_function	GO:0016491; oxidoreductase activity; molecular_function	GO:0045454; cell redox homeostasis; biological_process	GO:0016209; NA
transcript_HQ_HBZL_transcript1264/f2p0/3577	2	GO:0051087; chaperone binding; molecular_function	GO:0005515; protein binding; molecular_function
transcript_HQ_HBZL_transcript12640/f2p0/1891	5	GO:0005524; ATP binding; molecular_function	GO:0009755; hormone-mediated signaling pathway; biological_process	GO:0005576; NA	GO:0003676; nucleic acid binding; molecular_function	GO:0005184; neuropeptide hormone activity; molecular_function
transcript_HQ_HBZL_transcript12641/f2p0/1836	6	GO:0016021; integral to membrane; cellular_component	GO:0016020; membrane; cellular_component	GO:0006810; transport; biological_process	GO:0005215; NA	GO:0055085; transmembrane transport; biological_process	GO:0022857; transmembrane transporter activity; molecular_function
transcript_HQ_HBZL_transcript12645/f2p0/1837	1	GO:0005515; protein binding; molecular_function
transcript_HQ_HBZL_transcript12646/f3p0/1862	8	GO:0016209; NA	GO:0016491; oxidoreductase activity; molecular_function	GO:0045454; cell redox homeostasis; biological_process	GO:0009055; NA	GO:0005788; endoplasmic reticulum lumen; cellular_component	GO:0009306; protein secretion; biological_process	GO:0015035; protein disulfide oxidoreductase activity; molecular_function	GO:0055114; oxidation-reduction process; biological_process
transcript_HQ_HBZL_transcript12649/f2p0/1836	5	GO:0016021; integral to membrane; cellular_component	GO:0016020; membrane; cellular_component	GO:0005215; NA	GO:0055085; transmembrane transport; biological_process	GO:0006810; transport; biological_process
transcript_HQ_HBZL_transcript12652/f2p0/1837	5	GO:0000105; histidine biosynthetic process; biological_process	GO:0008270; zinc ion binding; molecular_function	GO:0055114; oxidation-reduction process; biological_process	GO:0051287; NAD binding; molecular_function	GO:0004399; histidinol dehydrogenase activity; molecular_function
transcript_HQ_HBZL_transcript12658/f4p0/1844	1	GO:0005515; protein binding; molecular_function
transcript_HQ_HBZL_transcript12659/f2p0/1843	6	GO:0055114; oxidation-reduction process; biological_process	GO:0006694; steroid biosynthetic process; biological_process	GO:0050662; coenzyme binding; molecular_function	GO:0003824; NA	GO:0003854; 3-beta-hydroxy-delta5-steroid dehydrogenase activity; molecular_function	GO:0016616; oxidoreductase activity, acting on the CH-OH group of donors, NAD or NADP as acceptor; molecular_function
transcript_HQ_HBZL_transcript1266/f2p0/3571	4	GO:0004672; protein kinase activity; molecular_function	GO:0006468; protein phosphorylation; biological_process	GO:0005524; ATP binding; molecular_function	GO:0005515; protein binding; molecular_function
transcript_HQ_HBZL_transcript12660/f2p0/1831	1	GO:0003824; NA
transcript_HQ_HBZL_transcript12662/f2p0/1864	6	GO:0005524; ATP binding; molecular_function	GO:0016020; membrane; cellular_component	GO:0016787; hydrolase activity; molecular_function	GO:0017038; protein import; biological_process	GO:0003677; DNA binding; molecular_function	GO:0003676; nucleic acid binding; molecular_function
transcript_HQ_HBZL_transcript12663/f2p0/1828	1	GO:0005515; protein binding; molecular_function
transcript_HQ_HBZL_transcript12664/f26p0/1813	3	GO:0006364; rRNA processing; biological_process	GO:0008168; methyltransferase activity; molecular_function	GO:0005515; protein binding; molecular_function
transcript_HQ_HBZL_transcript12665/f2p0/1864	3	GO:0043565; sequence-specific DNA binding; molecular_function	GO:0003700; sequence-specific DNA binding transcription factor activity; molecular_function	GO:0006355; regulation of transcription, DNA-dependent; biological_process
transcript_HQ_HBZL_transcript12668/f2p0/1832	3	GO:0006352; transcription initiation, DNA-dependent; biological_process	GO:0070461; SAGA-type complex; cellular_component	GO:0005669; transcription factor TFIID complex; cellular_component
transcript_HQ_HBZL_transcript12669/f6p0/1854	2	GO:0016853; isomerase activity; molecular_function	GO:0005975; carbohydrate metabolic process; biological_process
transcript_HQ_HBZL_transcript1267/f2p0/3588	2	GO:0016624; oxidoreductase activity, acting on the aldehyde or oxo group of donors, disulfide as acceptor; molecular_function	GO:0008152; NA
transcript_HQ_HBZL_transcript12670/f54p0/1813	2	GO:0008152; NA	GO:0016746; transferase activity, transferring acyl groups; molecular_function
transcript_HQ_HBZL_transcript12671/f3p0/1834	1	GO:0043130; ubiquitin binding; molecular_function
transcript_HQ_HBZL_transcript12673/f7p0/1824	1	GO:0003676; nucleic acid binding; molecular_function
transcript_HQ_HBZL_transcript12675/f2p0/1838	3	GO:0006468; protein phosphorylation; biological_process	GO:0004672; protein kinase activity; molecular_function	GO:0005524; ATP binding; molecular_function
transcript_HQ_HBZL_transcript12676/f2p0/1834	1	GO:0016747; transferase activity, transferring acyl groups other than amino-acyl groups; molecular_function
transcript_HQ_HBZL_transcript12677/f2p0/1832	2	GO:0016021; integral to membrane; cellular_component	GO:0004252; serine-type endopeptidase activity; molecular_function
transcript_HQ_HBZL_transcript12678/f3p0/1841	3	GO:0007186; G-protein coupled receptor protein signaling pathway; biological_process	GO:0016021; integral to membrane; cellular_component	GO:0019236; response to pheromone; biological_process
transcript_HQ_HBZL_transcript12679/f2p0/1833	9	GO:0008649; rRNA methyltransferase activity; molecular_function	GO:0006400; tRNA modification; biological_process	GO:0032259; methylation; biological_process	GO:0016429; tRNA (adenine-N1-)-methyltransferase activity; molecular_function	GO:0070475; rRNA base methylation; biological_process	GO:0008176; tRNA (guanine-N7-)-methyltransferase activity; molecular_function	GO:0030488; tRNA methylation; biological_process	GO:0008168; methyltransferase activity; molecular_function	GO:0031515; tRNA (m1A) methyltransferase complex; cellular_component
transcript_HQ_HBZL_transcript1268/f2p0/3670	2	GO:0005750; mitochondrial respiratory chain complex III; cellular_component	GO:0006122; mitochondrial electron transport, ubiquinol to cytochrome c; biological_process
transcript_HQ_HBZL_transcript12682/f2p0/1842	1	GO:0006284; base-excision repair; biological_process
transcript_HQ_HBZL_transcript12687/f5p0/1810	5	GO:0004672; protein kinase activity; molecular_function	GO:0016773; phosphotransferase activity, alcohol group as acceptor; molecular_function	GO:0006468; protein phosphorylation; biological_process	GO:0005524; ATP binding; molecular_function	GO:0016020; membrane; cellular_component
transcript_HQ_HBZL_transcript12688/f2p0/1870	8	GO:0016021; integral to membrane; cellular_component	GO:0016020; membrane; cellular_component	GO:0006810; transport; biological_process	GO:0005215; NA	GO:0055085; transmembrane transport; biological_process	GO:0005215; NA	GO:0006810; transport; biological_process	GO:0016020; membrane; cellular_component
transcript_HQ_HBZL_transcript12689/f2p0/1831	8	GO:0016485; protein processing; biological_process	GO:0004519; endonuclease activity; molecular_function	GO:0043571; maintenance of CRISPR repeat elements; biological_process	GO:0015743; malate transport; biological_process	GO:0004190; aspartic-type endopeptidase activity; molecular_function	GO:0016021; integral to membrane; cellular_component	GO:0006270; DNA-dependent DNA replication initiation; biological_process	GO:0003676; nucleic acid binding; molecular_function
transcript_HQ_HBZL_transcript12692/f6p0/1832	7	GO:0004535; poly(A)-specific ribonuclease activity; molecular_function	GO:0005737; cytoplasm; cellular_component	GO:0046872; metal ion binding; molecular_function	GO:0005634; nucleus; cellular_component	GO:0006402; mRNA catabolic process; biological_process	GO:0003676; nucleic acid binding; molecular_function	GO:0003723; RNA binding; molecular_function
transcript_HQ_HBZL_transcript12693/f2p0/1836	4	GO:0003676; nucleic acid binding; molecular_function	GO:0016787; hydrolase activity; molecular_function	GO:0003677; DNA binding; molecular_function	GO:0005524; ATP binding; molecular_function
transcript_HQ_HBZL_transcript12696/f3p0/1846	1	GO:0003333; amino acid transmembrane transport; biological_process
transcript_HQ_HBZL_transcript12697/f11p0/1835	3	GO:0055085; transmembrane transport; biological_process	GO:0022857; transmembrane transporter activity; molecular_function	GO:0016021; integral to membrane; cellular_component
transcript_HQ_HBZL_transcript12698/f4p0/1877	4	GO:0016491; oxidoreductase activity; molecular_function	GO:0003824; NA	GO:0050662; coenzyme binding; molecular_function	GO:0055114; oxidation-reduction process; biological_process
transcript_HQ_HBZL_transcript12699/f2p0/1851	3	GO:0004553; hydrolase activity, hydrolyzing O-glycosyl compounds; molecular_function	GO:0005975; carbohydrate metabolic process; biological_process	GO:0004557; alpha-galactosidase activity; molecular_function
transcript_HQ_HBZL_transcript127/f4p0/5633	3	GO:0019475; L-lysine catabolic process to acetate; biological_process	GO:0005515; protein binding; molecular_function	GO:0016740; transferase activity; molecular_function
transcript_HQ_HBZL_transcript1270/f2p0/3573	2	GO:0007010; cytoskeleton organization; biological_process	GO:0003779; actin binding; molecular_function
transcript_HQ_HBZL_transcript12702/f3p0/1845	2	GO:0016020; membrane; cellular_component	GO:0008375; acetylglucosaminyltransferase activity; molecular_function
transcript_HQ_HBZL_transcript12704/f4p0/1836	2	GO:0006355; regulation of transcription, DNA-dependent; biological_process	GO:0003700; sequence-specific DNA binding transcription factor activity; molecular_function
transcript_HQ_HBZL_transcript12707/f3p0/1823	1	GO:0003824; NA
transcript_HQ_HBZL_transcript1271/f3p0/3592	2	GO:0000145; exocyst; cellular_component	GO:0006887; exocytosis; biological_process
transcript_HQ_HBZL_transcript12710/f3p0/1852	2	GO:0004553; hydrolase activity, hydrolyzing O-glycosyl compounds; molecular_function	GO:0005975; carbohydrate metabolic process; biological_process
transcript_HQ_HBZL_transcript12712/f7p0/1845	8	GO:0006351; transcription, DNA-dependent; biological_process	GO:0003899; DNA-directed RNA polymerase activity; molecular_function	GO:0005515; protein binding; molecular_function	GO:0008270; zinc ion binding; molecular_function	GO:0003677; DNA binding; molecular_function	GO:0046872; metal ion binding; molecular_function	GO:0004842; ubiquitin-protein ligase activity; molecular_function	GO:0005680; anaphase-promoting complex; cellular_component
transcript_HQ_HBZL_transcript12718/f2p0/1831	2	GO:0016740; transferase activity; molecular_function	GO:0009058; biosynthetic process; biological_process
transcript_HQ_HBZL_transcript12719/f2p0/1835	2	GO:0004222; metalloendopeptidase activity; molecular_function	GO:0006508; proteolysis; biological_process
transcript_HQ_HBZL_transcript12723/f2p0/1872	1	GO:0005515; protein binding; molecular_function
transcript_HQ_HBZL_transcript12724/f2p0/1856	4	GO:0005576; NA	GO:0005524; ATP binding; molecular_function	GO:0006468; protein phosphorylation; biological_process	GO:0004672; protein kinase activity; molecular_function
transcript_HQ_HBZL_transcript12725/f3p0/1861	15	GO:0006355; regulation of transcription, DNA-dependent; biological_process	GO:0006914; autophagy; biological_process	GO:0031514; motile cilium; cellular_component	GO:0005634; nucleus; cellular_component	GO:0048870; cell motility; biological_process	GO:0006606; protein import into nucleus; biological_process	GO:0043565; sequence-specific DNA binding; molecular_function	GO:0005737; cytoplasm; cellular_component	GO:0043093; cytokinesis by binary fission; biological_process	GO:0007049; cell cycle; biological_process	GO:0006260; DNA replication; biological_process	GO:0003677; DNA binding; molecular_function	GO:0003700; sequence-specific DNA binding transcription factor activity; molecular_function	GO:0090529; NA	GO:0016021; integral to membrane; cellular_component
transcript_HQ_HBZL_transcript12729/f3p0/1843	1	GO:0005515; protein binding; molecular_function
transcript_HQ_HBZL_transcript1273/f2p0/3596	3	GO:0016579; protein deubiquitination; biological_process	GO:0004843; ubiquitin-specific protease activity; molecular_function	GO:0036459; NA
transcript_HQ_HBZL_transcript12731/f2p0/1846	1	GO:0005634; nucleus; cellular_component
transcript_HQ_HBZL_transcript12734/f2p0/1833	4	GO:0016705; oxidoreductase activity, acting on paired donors, with incorporation or reduction of molecular oxygen; molecular_function	GO:0055114; oxidation-reduction process; biological_process	GO:0005506; iron ion binding; molecular_function	GO:0020037; heme binding; molecular_function
transcript_HQ_HBZL_transcript12736/f4p0/1856	4	GO:0006351; transcription, DNA-dependent; biological_process	GO:0016020; membrane; cellular_component	GO:0055085; transmembrane transport; biological_process	GO:0006355; regulation of transcription, DNA-dependent; biological_process
transcript_HQ_HBZL_transcript12738/f5p0/1855	2	GO:0016579; protein deubiquitination; biological_process	GO:0036459; NA
transcript_HQ_HBZL_transcript12739/f2p0/1822	3	GO:0008219; cell death; biological_process	GO:0005576; NA	GO:0009405; pathogenesis; biological_process
transcript_HQ_HBZL_transcript1274/f2p0/3582	5	GO:0005634; nucleus; cellular_component	GO:0005515; protein binding; molecular_function	GO:0035023; regulation of Rho protein signal transduction; biological_process	GO:0006397; mRNA processing; biological_process	GO:0005089; Rho guanyl-nucleotide exchange factor activity; molecular_function
transcript_HQ_HBZL_transcript12740/f4p0/1831	2	GO:0016021; integral to membrane; cellular_component	GO:0055085; transmembrane transport; biological_process
transcript_HQ_HBZL_transcript12742/f3p0/1842	9	GO:0007165; signal transduction; biological_process	GO:0016773; phosphotransferase activity, alcohol group as acceptor; molecular_function	GO:0004672; protein kinase activity; molecular_function	GO:0005578; proteinaceous extracellular matrix; cellular_component	GO:0016020; membrane; cellular_component	GO:0005524; ATP binding; molecular_function	GO:0005509; calcium ion binding; molecular_function	GO:0006468; protein phosphorylation; biological_process	GO:0005515; protein binding; molecular_function
transcript_HQ_HBZL_transcript12743/f3p0/1837	5	GO:0015297; antiporter activity; molecular_function	GO:0016020; membrane; cellular_component	GO:0006855; drug transmembrane transport; biological_process	GO:0055085; transmembrane transport; biological_process	GO:0015238; drug transmembrane transporter activity; molecular_function
transcript_HQ_HBZL_transcript12745/f8p0/1848	3	GO:0005524; ATP binding; molecular_function	GO:0004672; protein kinase activity; molecular_function	GO:0006468; protein phosphorylation; biological_process
transcript_HQ_HBZL_transcript12752/f2p0/1865	3	GO:0008654; phospholipid biosynthetic process; biological_process	GO:0016020; membrane; cellular_component	GO:0016780; phosphotransferase activity, for other substituted phosphate groups; molecular_function
transcript_HQ_HBZL_transcript12753/f2p0/1830	1	GO:0005515; protein binding; molecular_function
transcript_HQ_HBZL_transcript12755/f4p0/1839	1	GO:0046983; protein dimerization activity; molecular_function
transcript_HQ_HBZL_transcript12756/f4p0/1848	1	GO:0005515; protein binding; molecular_function
transcript_HQ_HBZL_transcript12757/f4p0/1830	1	GO:0046983; protein dimerization activity; molecular_function
transcript_HQ_HBZL_transcript12759/f2p0/1846	5	GO:0055114; oxidation-reduction process; biological_process	GO:0051287; NAD binding; molecular_function	GO:0016491; oxidoreductase activity; molecular_function	GO:0050660; flavin adenine dinucleotide binding; molecular_function	GO:0008033; tRNA processing; biological_process
transcript_HQ_HBZL_transcript12762/f31p0/1781	7	GO:0006310; DNA recombination; biological_process	GO:0003723; RNA binding; molecular_function	GO:0003724; RNA helicase activity; molecular_function	GO:0006281; DNA repair; biological_process	GO:0016887; ATPase activity; molecular_function	GO:0009378; four-way junction helicase activity; molecular_function	GO:0005524; ATP binding; molecular_function
transcript_HQ_HBZL_transcript12766/f7p0/1832	7	GO:0045454; cell redox homeostasis; biological_process	GO:0003824; NA	GO:0009055; NA	GO:0000398; nuclear mRNA splicing, via spliceosome; biological_process	GO:0015035; protein disulfide oxidoreductase activity; molecular_function	GO:0005515; protein binding; molecular_function	GO:0005681; spliceosomal complex; cellular_component
transcript_HQ_HBZL_transcript12770/f2p0/1830	1	GO:0005515; protein binding; molecular_function
transcript_HQ_HBZL_transcript12774/f6p0/1835	4	GO:0042545; cell wall modification; biological_process	GO:0004857; enzyme inhibitor activity; molecular_function	GO:0005618; cell wall; cellular_component	GO:0030599; pectinesterase activity; molecular_function
transcript_HQ_HBZL_transcript12781/f6p0/1859	3	GO:0055085; transmembrane transport; biological_process	GO:0016020; membrane; cellular_component	GO:0016021; integral to membrane; cellular_component
transcript_HQ_HBZL_transcript12782/f2p0/1835	3	GO:0005524; ATP binding; molecular_function	GO:0006468; protein phosphorylation; biological_process	GO:0004672; protein kinase activity; molecular_function
transcript_HQ_HBZL_transcript12783/f5p0/1842	4	GO:0016020; membrane; cellular_component	GO:0005524; ATP binding; molecular_function	GO:0006468; protein phosphorylation; biological_process	GO:0004672; protein kinase activity; molecular_function
transcript_HQ_HBZL_transcript12788/f2p0/1834	4	GO:0005622; intracellular; cellular_component	GO:0003735; structural constituent of ribosome; molecular_function	GO:0006412; translation; biological_process	GO:0005840; ribosome; cellular_component
transcript_HQ_HBZL_transcript12791/f3p0/1798	2	GO:0016787; hydrolase activity; molecular_function	GO:0005515; protein binding; molecular_function
transcript_HQ_HBZL_transcript12793/f2p0/1829	1	GO:0004857; enzyme inhibitor activity; molecular_function
transcript_HQ_HBZL_transcript12794/f2p0/1837	6	GO:0019028; viral capsid; cellular_component	GO:0016705; oxidoreductase activity, acting on paired donors, with incorporation or reduction of molecular oxygen; molecular_function	GO:0055114; oxidation-reduction process; biological_process	GO:0005198; NA	GO:0005506; iron ion binding; molecular_function	GO:0020037; heme binding; molecular_function
transcript_HQ_HBZL_transcript12795/f2p0/1848	8	GO:0003677; DNA binding; molecular_function	GO:0046872; metal ion binding; molecular_function	GO:0004842; ubiquitin-protein ligase activity; molecular_function	GO:0003899; DNA-directed RNA polymerase activity; molecular_function	GO:0006351; transcription, DNA-dependent; biological_process	GO:0008270; zinc ion binding; molecular_function	GO:0005515; protein binding; molecular_function	GO:0005680; anaphase-promoting complex; cellular_component
transcript_HQ_HBZL_transcript12798/f4p0/1859	3	GO:0003830; beta-1,4-mannosylglycoprotein 4-beta-N-acetylglucosaminyltransferase activity; molecular_function	GO:0016020; membrane; cellular_component	GO:0006487; protein N-linked glycosylation; biological_process
transcript_HQ_HBZL_transcript128/f3p0/5626	1	GO:0003677; DNA binding; molecular_function
transcript_HQ_HBZL_transcript1280/f4p0/3587	3	GO:0005516; calmodulin binding; molecular_function	GO:0000166; nucleotide binding; molecular_function	GO:0046872; metal ion binding; molecular_function
transcript_HQ_HBZL_transcript12801/f3p0/1833	3	GO:0005516; calmodulin binding; molecular_function	GO:0031175; neuron projection development; biological_process	GO:0030507; spectrin binding; molecular_function
transcript_HQ_HBZL_transcript12803/f2p0/1821	2	GO:0006506; GPI anchor biosynthetic process; biological_process	GO:0016021; integral to membrane; cellular_component
transcript_HQ_HBZL_transcript12804/f3p0/1837	2	GO:0008152; NA	GO:0016758; transferase activity, transferring hexosyl groups; molecular_function
transcript_HQ_HBZL_transcript1281/f2p0/3577	1	GO:0003723; RNA binding; molecular_function
transcript_HQ_HBZL_transcript12810/f3p0/1826	4	GO:0016763; transferase activity, transferring pentosyl groups; molecular_function	GO:0008152; NA	GO:0006213; pyrimidine nucleoside metabolic process; biological_process	GO:0016746; transferase activity, transferring acyl groups; molecular_function
transcript_HQ_HBZL_transcript12814/f6p0/1856	2	GO:0070569; uridylyltransferase activity; molecular_function	GO:0008152; NA
transcript_HQ_HBZL_transcript12816/f15p0/1810	4	GO:0046872; metal ion binding; molecular_function	GO:0050992; dimethylallyl diphosphate biosynthetic process; biological_process	GO:0051745; 4-hydroxy-3-methylbut-2-en-1-yl diphosphate reductase activity; molecular_function	GO:0019288; isopentenyl diphosphate biosynthetic process, mevalonate-independent pathway; biological_process
transcript_HQ_HBZL_transcript12817/f30p0/1750	4	GO:0008270; zinc ion binding; molecular_function	GO:0005515; protein binding; molecular_function	GO:0016567; protein ubiquitination; biological_process	GO:0004842; ubiquitin-protein ligase activity; molecular_function
transcript_HQ_HBZL_transcript12819/f2p0/1856	4	GO:0005515; protein binding; molecular_function	GO:0008270; zinc ion binding; molecular_function	GO:0061630; NA	GO:0046872; metal ion binding; molecular_function
transcript_HQ_HBZL_transcript1282/f2p0/3492	2	GO:0008152; NA	GO:0008168; methyltransferase activity; molecular_function
transcript_HQ_HBZL_transcript12822/f4p0/1830	4	GO:0020037; heme binding; molecular_function	GO:0005506; iron ion binding; molecular_function	GO:0055114; oxidation-reduction process; biological_process	GO:0016705; oxidoreductase activity, acting on paired donors, with incorporation or reduction of molecular oxygen; molecular_function
transcript_HQ_HBZL_transcript12824/f5p0/1845	2	GO:0008152; NA	GO:0003824; NA
transcript_HQ_HBZL_transcript12826/f4p0/1828	2	GO:0005975; carbohydrate metabolic process; biological_process	GO:0004553; hydrolase activity, hydrolyzing O-glycosyl compounds; molecular_function
transcript_HQ_HBZL_transcript12827/f2p0/1850	1	GO:0016788; hydrolase activity, acting on ester bonds; molecular_function
transcript_HQ_HBZL_transcript1283/f2p0/3308	1	GO:0005524; ATP binding; molecular_function
transcript_HQ_HBZL_transcript12837/f2p0/1857	4	GO:0003756; protein disulfide isomerase activity; molecular_function	GO:0016671; oxidoreductase activity, acting on a sulfur group of donors, disulfide as acceptor; molecular_function	GO:0055114; oxidation-reduction process; biological_process	GO:0005783; endoplasmic reticulum; cellular_component
transcript_HQ_HBZL_transcript12842/f4p0/1853	2	GO:0016020; membrane; cellular_component	GO:0015031; protein transport; biological_process
transcript_HQ_HBZL_transcript12844/f2p0/1835	2	GO:0003824; NA	GO:0008152; NA
transcript_HQ_HBZL_transcript12846/f7p0/1817	2	GO:0055114; oxidation-reduction process; biological_process	GO:0016491; oxidoreductase activity; molecular_function
transcript_HQ_HBZL_transcript12847/f6p0/1834	8	GO:0003700; sequence-specific DNA binding transcription factor activity; molecular_function	GO:0003677; DNA binding; molecular_function	GO:0048870; cell motility; biological_process	GO:0043565; sequence-specific DNA binding; molecular_function	GO:0005634; nucleus; cellular_component	GO:0006355; regulation of transcription, DNA-dependent; biological_process	GO:0006914; autophagy; biological_process	GO:0031514; motile cilium; cellular_component
transcript_HQ_HBZL_transcript12849/f8p0/1827	1	GO:0005515; protein binding; molecular_function
transcript_HQ_HBZL_transcript1285/f3p0/3590	1	GO:0008289; lipid binding; molecular_function
transcript_HQ_HBZL_transcript12850/f3p0/1835	3	GO:0008152; NA	GO:0055114; oxidation-reduction process; biological_process	GO:0016491; oxidoreductase activity; molecular_function
transcript_HQ_HBZL_transcript12851/f13p0/1837	3	GO:0016788; hydrolase activity, acting on ester bonds; molecular_function	GO:0005743; mitochondrial inner membrane; cellular_component	GO:0004129; cytochrome-c oxidase activity; molecular_function
transcript_HQ_HBZL_transcript12853/f2p0/1846	5	GO:0003677; DNA binding; molecular_function	GO:0005634; nucleus; cellular_component	GO:0042742; defense response to bacterium; biological_process	GO:0006355; regulation of transcription, DNA-dependent; biological_process	GO:0005576; NA
transcript_HQ_HBZL_transcript12855/f3p0/1855	9	GO:0006355; regulation of transcription, DNA-dependent; biological_process	GO:0005634; nucleus; cellular_component	GO:0006359; regulation of transcription from RNA polymerase III promoter; biological_process	GO:0019888; protein phosphatase regulator activity; molecular_function	GO:0030289; protein phosphatase 4 complex; cellular_component	GO:0005944; 1-phosphatidylinositol-4-phosphate 3-kinase, class IB complex; cellular_component	GO:0046935; 1-phosphatidylinositol-3-kinase regulator activity; molecular_function	GO:0003700; sequence-specific DNA binding transcription factor activity; molecular_function	GO:0008270; zinc ion binding; molecular_function
transcript_HQ_HBZL_transcript12856/f3p0/1877	5	GO:0007264; small GTPase mediated signal transduction; biological_process	GO:0002949; NA	GO:0005525; GTP binding; molecular_function	GO:0005515; protein binding; molecular_function	GO:0005509; calcium ion binding; molecular_function
transcript_HQ_HBZL_transcript1286/f2p0/3591	1	GO:0003723; RNA binding; molecular_function
transcript_HQ_HBZL_transcript12860/f2p0/1847	2	GO:0003723; RNA binding; molecular_function	GO:0003676; nucleic acid binding; molecular_function
transcript_HQ_HBZL_transcript12861/f2p0/1826	2	GO:0006355; regulation of transcription, DNA-dependent; biological_process	GO:0042393; histone binding; molecular_function
transcript_HQ_HBZL_transcript12863/f2p0/1872	4	GO:0055114; oxidation-reduction process; biological_process	GO:0006979; response to oxidative stress; biological_process	GO:0004601; peroxidase activity; molecular_function	GO:0020037; heme binding; molecular_function
transcript_HQ_HBZL_transcript12864/f3p0/1824	1	GO:0005515; protein binding; molecular_function
transcript_HQ_HBZL_transcript12867/f2p0/1841	3	GO:0004672; protein kinase activity; molecular_function	GO:0006468; protein phosphorylation; biological_process	GO:0005524; ATP binding; molecular_function
transcript_HQ_HBZL_transcript12868/f2p0/1819	3	GO:0005524; ATP binding; molecular_function	GO:0004672; protein kinase activity; molecular_function	GO:0006468; protein phosphorylation; biological_process
transcript_HQ_HBZL_transcript12870/f4p0/1820	9	GO:0006276; plasmid maintenance; biological_process	GO:0005852; eukaryotic translation initiation factor 3 complex; cellular_component	GO:0005737; cytoplasm; cellular_component	GO:0016485; protein processing; biological_process	GO:0003743; translation initiation factor activity; molecular_function	GO:0008565; protein transporter activity; molecular_function	GO:0004190; aspartic-type endopeptidase activity; molecular_function	GO:0015031; protein transport; biological_process	GO:0016021; integral to membrane; cellular_component
transcript_HQ_HBZL_transcript12873/f4p0/1824	4	GO:0005634; nucleus; cellular_component	GO:0003677; DNA binding; molecular_function	GO:0003899; DNA-directed RNA polymerase activity; molecular_function	GO:0006351; transcription, DNA-dependent; biological_process
transcript_HQ_HBZL_transcript1288/f3p0/3578	5	GO:0030127; COPII vesicle coat; cellular_component	GO:0006888; ER to Golgi vesicle-mediated transport; biological_process	GO:0006886; intracellular protein transport; biological_process	GO:0008270; zinc ion binding; molecular_function	GO:0005515; protein binding; molecular_function
transcript_HQ_HBZL_transcript12882/f3p0/1851	6	GO:0016491; oxidoreductase activity; molecular_function	GO:0051287; NAD binding; molecular_function	GO:0050660; flavin adenine dinucleotide binding; molecular_function	GO:0045454; cell redox homeostasis; biological_process	GO:0008033; tRNA processing; biological_process	GO:0055114; oxidation-reduction process; biological_process
transcript_HQ_HBZL_transcript12883/f2p0/1821	4	GO:0004427; inorganic diphosphatase activity; molecular_function	GO:0006796; phosphate metabolic process; biological_process	GO:0005737; cytoplasm; cellular_component	GO:0000287; magnesium ion binding; molecular_function
transcript_HQ_HBZL_transcript12884/f29p0/1784	8	GO:0004857; enzyme inhibitor activity; molecular_function	GO:0000151; ubiquitin ligase complex; cellular_component	GO:0016567; protein ubiquitination; biological_process	GO:0030599; pectinesterase activity; molecular_function	GO:0005618; cell wall; cellular_component	GO:0034450; ubiquitin-ubiquitin ligase activity; molecular_function	GO:0042545; cell wall modification; biological_process	GO:0006511; ubiquitin-dependent protein catabolic process; biological_process
transcript_HQ_HBZL_transcript12886/f2p0/1827	4	GO:0016705; oxidoreductase activity, acting on paired donors, with incorporation or reduction of molecular oxygen; molecular_function	GO:0055114; oxidation-reduction process; biological_process	GO:0020037; heme binding; molecular_function	GO:0005506; iron ion binding; molecular_function
transcript_HQ_HBZL_transcript12887/f2p0/1819	1	GO:0003676; nucleic acid binding; molecular_function
transcript_HQ_HBZL_transcript12888/f20p0/1825	5	GO:0010215; cellulose microfibril organization; biological_process	GO:0006952; defense response; biological_process	GO:0003677; DNA binding; molecular_function	GO:0016049; cell growth; biological_process	GO:0031225; anchored to membrane; cellular_component
transcript_HQ_HBZL_transcript1289/f2p0/3584	3	GO:0005524; ATP binding; molecular_function	GO:0006468; protein phosphorylation; biological_process	GO:0004672; protein kinase activity; molecular_function
transcript_HQ_HBZL_transcript12891/f2p0/1819	3	GO:0004363; glutathione synthase activity; molecular_function	GO:0006750; glutathione biosynthetic process; biological_process	GO:0005524; ATP binding; molecular_function
transcript_HQ_HBZL_transcript12892/f2p0/1833	2	GO:0005975; carbohydrate metabolic process; biological_process	GO:0004553; hydrolase activity, hydrolyzing O-glycosyl compounds; molecular_function
transcript_HQ_HBZL_transcript12895/f6p0/1813	4	GO:0042545; cell wall modification; biological_process	GO:0004857; enzyme inhibitor activity; molecular_function	GO:0005618; cell wall; cellular_component	GO:0030599; pectinesterase activity; molecular_function
transcript_HQ_HBZL_transcript12896/f6p0/1824	4	GO:0009401; phosphoenolpyruvate-dependent sugar phosphotransferase system; biological_process	GO:0016021; integral to membrane; cellular_component	GO:0005515; protein binding; molecular_function	GO:0008982; protein-N(PI)-phosphohistidine-sugar phosphotransferase activity; molecular_function
transcript_HQ_HBZL_transcript12897/f2p0/1819	3	GO:0016831; carboxy-lyase activity; molecular_function	GO:0030170; pyridoxal phosphate binding; molecular_function	GO:0019752; carboxylic acid metabolic process; biological_process
transcript_HQ_HBZL_transcript12899/f2p0/1820	4	GO:0016705; oxidoreductase activity, acting on paired donors, with incorporation or reduction of molecular oxygen; molecular_function	GO:0055114; oxidation-reduction process; biological_process	GO:0020037; heme binding; molecular_function	GO:0005506; iron ion binding; molecular_function
transcript_HQ_HBZL_transcript12900/f2p0/1821	4	GO:0055114; oxidation-reduction process; biological_process	GO:0016491; oxidoreductase activity; molecular_function	GO:0051287; NAD binding; molecular_function	GO:0006520; cellular amino acid metabolic process; biological_process
transcript_HQ_HBZL_transcript12901/f3p0/1817	10	GO:0015171; amino acid transmembrane transporter activity; molecular_function	GO:0006810; transport; biological_process	GO:0055085; transmembrane transport; biological_process	GO:0016020; membrane; cellular_component	GO:0003333; amino acid transmembrane transport; biological_process	GO:0006810; transport; biological_process	GO:0015171; amino acid transmembrane transporter activity; molecular_function	GO:0055085; transmembrane transport; biological_process	GO:0016020; membrane; cellular_component	GO:0003333; amino acid transmembrane transport; biological_process
transcript_HQ_HBZL_transcript12902/f7p0/1835	3	GO:0008270; zinc ion binding; molecular_function	GO:0005515; protein binding; molecular_function	GO:0005622; intracellular; cellular_component
transcript_HQ_HBZL_transcript12903/f6p0/1820	3	GO:0033179; proton-transporting V-type ATPase, V0 domain; cellular_component	GO:0015991; ATP hydrolysis coupled proton transport; biological_process	GO:0015078; hydrogen ion transmembrane transporter activity; molecular_function
transcript_HQ_HBZL_transcript12907/f8p0/1837	5	GO:0016773; phosphotransferase activity, alcohol group as acceptor; molecular_function	GO:0006468; protein phosphorylation; biological_process	GO:0004672; protein kinase activity; molecular_function	GO:0016020; membrane; cellular_component	GO:0005524; ATP binding; molecular_function
transcript_HQ_HBZL_transcript12908/f7p0/1837	4	GO:0061630; NA	GO:0046872; metal ion binding; molecular_function	GO:0005515; protein binding; molecular_function	GO:0008270; zinc ion binding; molecular_function
transcript_HQ_HBZL_transcript12909/f5p0/1818	5	GO:0004315; 3-oxoacyl-[acyl-carrier-protein] synthase activity; molecular_function	GO:0006633; fatty acid biosynthetic process; biological_process	GO:0016020; membrane; cellular_component	GO:0005267; potassium channel activity; molecular_function	GO:0016747; transferase activity, transferring acyl groups other than amino-acyl groups; molecular_function
transcript_HQ_HBZL_transcript1291/f2p0/3569	2	GO:0000166; nucleotide binding; molecular_function	GO:0046872; metal ion binding; molecular_function
transcript_HQ_HBZL_transcript12913/f5p0/1820	7	GO:0030983; mismatched DNA binding; molecular_function	GO:0007165; signal transduction; biological_process	GO:0006298; mismatch repair; biological_process	GO:0005737; cytoplasm; cellular_component	GO:0034227; tRNA thio-modification; biological_process	GO:0005524; ATP binding; molecular_function	GO:0016021; integral to membrane; cellular_component
transcript_HQ_HBZL_transcript12914/f2p0/1886	3	GO:0022857; transmembrane transporter activity; molecular_function	GO:0055085; transmembrane transport; biological_process	GO:0016021; integral to membrane; cellular_component
transcript_HQ_HBZL_transcript12917/f4p0/1835	3	GO:0004672; protein kinase activity; molecular_function	GO:0006468; protein phosphorylation; biological_process	GO:0005524; ATP binding; molecular_function
transcript_HQ_HBZL_transcript12918/f6p0/1833	1	GO:0005515; protein binding; molecular_function
transcript_HQ_HBZL_transcript12919/f3p0/1832	3	GO:0016485; protein processing; biological_process	GO:0016021; integral to membrane; cellular_component	GO:0004190; aspartic-type endopeptidase activity; molecular_function
transcript_HQ_HBZL_transcript12923/f9p0/1819	1	GO:0003824; NA
transcript_HQ_HBZL_transcript12924/f3p0/1819	2	GO:0005515; protein binding; molecular_function	GO:0046872; metal ion binding; molecular_function
transcript_HQ_HBZL_transcript12929/f2p0/1816	2	GO:0008152; NA	GO:0003824; NA
transcript_HQ_HBZL_transcript12931/f16p0/1807	4	GO:0006468; protein phosphorylation; biological_process	GO:0004672; protein kinase activity; molecular_function	GO:0016020; membrane; cellular_component	GO:0005524; ATP binding; molecular_function
transcript_HQ_HBZL_transcript12937/f2p0/1830	2	GO:0016993; precorrin-8X methylmutase activity; molecular_function	GO:0009236; cobalamin biosynthetic process; biological_process
transcript_HQ_HBZL_transcript12938/f4p0/1850	1	GO:0005515; protein binding; molecular_function
transcript_HQ_HBZL_transcript12939/f4p0/1819	2	GO:0016746; transferase activity, transferring acyl groups; molecular_function	GO:0008152; NA
transcript_HQ_HBZL_transcript12941/f3p0/1835	2	GO:0016021; integral to membrane; cellular_component	GO:0008855; exodeoxyribonuclease VII activity; molecular_function
transcript_HQ_HBZL_transcript12942/f2p0/1827	2	GO:0005975; carbohydrate metabolic process; biological_process	GO:0004553; hydrolase activity, hydrolyzing O-glycosyl compounds; molecular_function
transcript_HQ_HBZL_transcript12944/f2p0/1816	4	GO:0018298; protein-chromophore linkage; biological_process	GO:0006355; regulation of transcription, DNA-dependent; biological_process	GO:0009584; detection of visible light; biological_process	GO:0046912; transferase activity, transferring acyl groups, acyl groups converted into alkyl on transfer; molecular_function
transcript_HQ_HBZL_transcript12945/f2p0/1825	6	GO:0050660; flavin adenine dinucleotide binding; molecular_function	GO:0008033; tRNA processing; biological_process	GO:0055114; oxidation-reduction process; biological_process	GO:0018580; nitronate monooxygenase activity; molecular_function	GO:0017150; tRNA dihydrouridine synthase activity; molecular_function	GO:0000105; histidine biosynthetic process; biological_process
transcript_HQ_HBZL_transcript12946/f3p0/1828	4	GO:0006412; translation; biological_process	GO:0003735; structural constituent of ribosome; molecular_function	GO:0005622; intracellular; cellular_component	GO:0005840; ribosome; cellular_component
transcript_HQ_HBZL_transcript12947/f3p0/1837	3	GO:0006506; GPI anchor biosynthetic process; biological_process	GO:0016021; integral to membrane; cellular_component	GO:0017176; phosphatidylinositol N-acetylglucosaminyltransferase activity; molecular_function
transcript_HQ_HBZL_transcript12948/f4p0/1840	3	GO:0008152; NA	GO:0055114; oxidation-reduction process; biological_process	GO:0016491; oxidoreductase activity; molecular_function
transcript_HQ_HBZL_transcript1295/f11p0/3583	2	GO:0016624; oxidoreductase activity, acting on the aldehyde or oxo group of donors, disulfide as acceptor; molecular_function	GO:0008152; NA
transcript_HQ_HBZL_transcript12951/f18p0/1815	2	GO:0008483; transaminase activity; molecular_function	GO:0030170; pyridoxal phosphate binding; molecular_function
transcript_HQ_HBZL_transcript12952/f2p0/1817	6	GO:0006468; protein phosphorylation; biological_process	GO:0001503; ossification; biological_process	GO:0004672; protein kinase activity; molecular_function	GO:0007155; cell adhesion; biological_process	GO:0005576; NA	GO:0005524; ATP binding; molecular_function
transcript_HQ_HBZL_transcript12955/f2p0/1831	1	GO:0003824; NA
transcript_HQ_HBZL_transcript12956/f2p0/1815	1	GO:0005515; protein binding; molecular_function
transcript_HQ_HBZL_transcript12957/f5p0/1828	13	GO:0002949; NA	GO:0016301; kinase activity; molecular_function	GO:0006260; DNA replication; biological_process	GO:0003677; DNA binding; molecular_function	GO:0006310; DNA recombination; biological_process	GO:0008134; transcription factor binding; molecular_function	GO:0003678; DNA helicase activity; molecular_function	GO:0005524; ATP binding; molecular_function	GO:0016887; ATPase activity; molecular_function	GO:0009378; four-way junction helicase activity; molecular_function	GO:0006281; DNA repair; biological_process	GO:0016787; hydrolase activity; molecular_function	GO:0006355; regulation of transcription, DNA-dependent; biological_process
transcript_HQ_HBZL_transcript1296/f7p0/3568	2	GO:0005634; nucleus; cellular_component	GO:0003676; nucleic acid binding; molecular_function
transcript_HQ_HBZL_transcript12966/f2p0/1876	4	GO:0016020; membrane; cellular_component	GO:0030001; metal ion transport; biological_process	GO:0046873; metal ion transmembrane transporter activity; molecular_function	GO:0055085; transmembrane transport; biological_process
transcript_HQ_HBZL_transcript12967/f3p0/1831	4	GO:0003824; NA	GO:0003919; FMN adenylyltransferase activity; molecular_function	GO:0009231; riboflavin biosynthetic process; biological_process	GO:0009058; biosynthetic process; biological_process
transcript_HQ_HBZL_transcript12968/f2p0/1832	3	GO:0005576; NA	GO:0009405; pathogenesis; biological_process	GO:0008219; cell death; biological_process
transcript_HQ_HBZL_transcript12969/f2p0/1830	6	GO:0045454; cell redox homeostasis; biological_process	GO:0016491; oxidoreductase activity; molecular_function	GO:0003824; NA	GO:0016209; NA	GO:0055114; oxidation-reduction process; biological_process	GO:0008152; NA
transcript_HQ_HBZL_transcript12972/f6p0/1810	6	GO:0016616; oxidoreductase activity, acting on the CH-OH group of donors, NAD or NADP as acceptor; molecular_function	GO:0003854; 3-beta-hydroxy-delta5-steroid dehydrogenase activity; molecular_function	GO:0003824; NA	GO:0050662; coenzyme binding; molecular_function	GO:0055114; oxidation-reduction process; biological_process	GO:0006694; steroid biosynthetic process; biological_process
transcript_HQ_HBZL_transcript12976/f5p0/1818	3	GO:0006396; RNA processing; biological_process	GO:0031412; gas vesicle organization; biological_process	GO:0004526; ribonuclease P activity; molecular_function
transcript_HQ_HBZL_transcript12977/f3p0/1834	3	GO:0016491; oxidoreductase activity; molecular_function	GO:0016616; oxidoreductase activity, acting on the CH-OH group of donors, NAD or NADP as acceptor; molecular_function	GO:0055114; oxidation-reduction process; biological_process
transcript_HQ_HBZL_transcript12979/f4p0/1828	1	GO:0019867; outer membrane; cellular_component
transcript_HQ_HBZL_transcript1298/f2p0/3586	2	GO:0008152; NA	GO:0016624; oxidoreductase activity, acting on the aldehyde or oxo group of donors, disulfide as acceptor; molecular_function
transcript_HQ_HBZL_transcript12981/f2p0/1829	5	GO:0016020; membrane; cellular_component	GO:0005524; ATP binding; molecular_function	GO:0016773; phosphotransferase activity, alcohol group as acceptor; molecular_function	GO:0006468; protein phosphorylation; biological_process	GO:0004672; protein kinase activity; molecular_function
transcript_HQ_HBZL_transcript12982/f7p0/1890	4	GO:0020037; heme binding; molecular_function	GO:0005506; iron ion binding; molecular_function	GO:0016705; oxidoreductase activity, acting on paired donors, with incorporation or reduction of molecular oxygen; molecular_function	GO:0055114; oxidation-reduction process; biological_process
transcript_HQ_HBZL_transcript12983/f2p0/1812	2	GO:0016020; membrane; cellular_component	GO:0008375; acetylglucosaminyltransferase activity; molecular_function
transcript_HQ_HBZL_transcript12985/f2p0/1825	6	GO:0005672; transcription factor TFIIA complex; cellular_component	GO:0006355; regulation of transcription, DNA-dependent; biological_process	GO:0006614; SRP-dependent cotranslational protein targeting to membrane; biological_process	GO:0048500; signal recognition particle; cellular_component	GO:0006367; transcription initiation from RNA polymerase II promoter; biological_process	GO:0008312; 7S RNA binding; molecular_function
transcript_HQ_HBZL_transcript12986/f3p0/1829	3	GO:0005524; ATP binding; molecular_function	GO:0004672; protein kinase activity; molecular_function	GO:0006468; protein phosphorylation; biological_process
transcript_HQ_HBZL_transcript12987/f2p0/1831	2	GO:0055114; oxidation-reduction process; biological_process	GO:0016491; oxidoreductase activity; molecular_function
transcript_HQ_HBZL_transcript12992/f10p0/1870	5	GO:0005524; ATP binding; molecular_function	GO:0016020; membrane; cellular_component	GO:0004672; protein kinase activity; molecular_function	GO:0006468; protein phosphorylation; biological_process	GO:0016773; phosphotransferase activity, alcohol group as acceptor; molecular_function
transcript_HQ_HBZL_transcript12994/f10p0/1817	4	GO:0000502; proteasome complex; cellular_component	GO:0030234; NA	GO:0005515; protein binding; molecular_function	GO:0042176; regulation of protein catabolic process; biological_process
transcript_HQ_HBZL_transcript12998/f2p0/1813	1	GO:0046677; response to antibiotic; biological_process
transcript_HQ_HBZL_transcript12999/f5p0/1827	1	GO:0016747; transferase activity, transferring acyl groups other than amino-acyl groups; molecular_function
transcript_HQ_HBZL_transcript13/f2p0/7497	1	GO:0006890; retrograde vesicle-mediated transport, Golgi to ER; biological_process
transcript_HQ_HBZL_transcript13006/f2p0/1828	4	GO:0055114; oxidation-reduction process; biological_process	GO:0016705; oxidoreductase activity, acting on paired donors, with incorporation or reduction of molecular oxygen; molecular_function	GO:0020037; heme binding; molecular_function	GO:0005506; iron ion binding; molecular_function
transcript_HQ_HBZL_transcript13008/f3p0/1808	3	GO:0008270; zinc ion binding; molecular_function	GO:0005515; protein binding; molecular_function	GO:0046872; metal ion binding; molecular_function
transcript_HQ_HBZL_transcript1301/f4p0/3603	1	GO:0003824; NA
transcript_HQ_HBZL_transcript13017/f4p0/1820	3	GO:0005886; plasma membrane; cellular_component	GO:0006810; transport; biological_process	GO:0015288; porin activity; molecular_function
transcript_HQ_HBZL_transcript13020/f4p0/1811	9	GO:0005577; fibrinogen complex; cellular_component	GO:0030674; protein binding, bridging; molecular_function	GO:0051321; meiotic cell cycle; biological_process	GO:0007165; signal transduction; biological_process	GO:0030168; platelet activation; biological_process	GO:0005102; receptor binding; molecular_function	GO:0015631; tubulin binding; molecular_function	GO:0051258; protein polymerization; biological_process	GO:0005515; protein binding; molecular_function
transcript_HQ_HBZL_transcript13021/f2p0/1807	2	GO:0043248; proteasome assembly; biological_process	GO:0005515; protein binding; molecular_function
transcript_HQ_HBZL_transcript13022/f24p0/1807	5	GO:0008033; tRNA processing; biological_process	GO:0016491; oxidoreductase activity; molecular_function	GO:0050660; flavin adenine dinucleotide binding; molecular_function	GO:0045454; cell redox homeostasis; biological_process	GO:0055114; oxidation-reduction process; biological_process
transcript_HQ_HBZL_transcript13023/f8p0/1817	1	GO:0016020; membrane; cellular_component
transcript_HQ_HBZL_transcript13026/f13p0/1815	3	GO:0055114; oxidation-reduction process; biological_process	GO:0004096; catalase activity; molecular_function	GO:0020037; heme binding; molecular_function
transcript_HQ_HBZL_transcript13032/f2p0/1820	4	GO:0008324; cation transmembrane transporter activity; molecular_function	GO:0006812; cation transport; biological_process	GO:0016021; integral to membrane; cellular_component	GO:0055085; transmembrane transport; biological_process
transcript_HQ_HBZL_transcript13033/f10p0/1813	1	GO:0016747; transferase activity, transferring acyl groups other than amino-acyl groups; molecular_function
transcript_HQ_HBZL_transcript13035/f2p0/1816	1	GO:0003676; nucleic acid binding; molecular_function
transcript_HQ_HBZL_transcript13036/f2p0/1797	4	GO:0004565; beta-galactosidase activity; molecular_function	GO:0004553; hydrolase activity, hydrolyzing O-glycosyl compounds; molecular_function	GO:0009341; beta-galactosidase complex; cellular_component	GO:0005975; carbohydrate metabolic process; biological_process
transcript_HQ_HBZL_transcript13037/f6p0/1813	2	GO:0006508; proteolysis; biological_process	GO:0004185; serine-type carboxypeptidase activity; molecular_function
transcript_HQ_HBZL_transcript13038/f3p0/1809	1	GO:0006270; DNA-dependent DNA replication initiation; biological_process
transcript_HQ_HBZL_transcript13040/f24p0/1765	7	GO:0000049; tRNA binding; molecular_function	GO:0000166; nucleotide binding; molecular_function	GO:0043039; tRNA aminoacylation; biological_process	GO:0005524; ATP binding; molecular_function	GO:0005737; cytoplasm; cellular_component	GO:0006418; tRNA aminoacylation for protein translation; biological_process	GO:0004812; aminoacyl-tRNA ligase activity; molecular_function
transcript_HQ_HBZL_transcript13041/f2p0/1822	2	GO:0016114; terpenoid biosynthetic process; biological_process	GO:0008685; 2-C-methyl-D-erythritol 2,4-cyclodiphosphate synthase activity; molecular_function
transcript_HQ_HBZL_transcript13042/f10p0/1842	6	GO:0005525; GTP binding; molecular_function	GO:0003924; GTPase activity; molecular_function	GO:0016887; ATPase activity; molecular_function	GO:0005524; ATP binding; molecular_function	GO:0003723; RNA binding; molecular_function	GO:0003724; RNA helicase activity; molecular_function
transcript_HQ_HBZL_transcript13048/f3p0/1817	3	GO:0003676; nucleic acid binding; molecular_function	GO:0006139; nucleobase, nucleoside, nucleotide and nucleic acid metabolic process; biological_process	GO:0008408; 3'-5' exonuclease activity; molecular_function
transcript_HQ_HBZL_transcript1305/f2p0/3589	1	GO:0003677; DNA binding; molecular_function
transcript_HQ_HBZL_transcript13053/f3p0/1812	2	GO:0006807; nitrogen compound metabolic process; biological_process	GO:0016810; hydrolase activity, acting on carbon-nitrogen (but not peptide) bonds; molecular_function
transcript_HQ_HBZL_transcript13054/f2p0/1816	4	GO:0003700; sequence-specific DNA binding transcription factor activity; molecular_function	GO:0006355; regulation of transcription, DNA-dependent; biological_process	GO:0043565; sequence-specific DNA binding; molecular_function	GO:0008270; zinc ion binding; molecular_function
transcript_HQ_HBZL_transcript13060/f26p0/1826	3	GO:0016491; oxidoreductase activity; molecular_function	GO:0055114; oxidation-reduction process; biological_process	GO:0005507; copper ion binding; molecular_function
transcript_HQ_HBZL_transcript13064/f13p0/1807	5	GO:0005515; protein binding; molecular_function	GO:0008270; zinc ion binding; molecular_function	GO:0046872; metal ion binding; molecular_function	GO:0005680; anaphase-promoting complex; cellular_component	GO:0004842; ubiquitin-protein ligase activity; molecular_function
transcript_HQ_HBZL_transcript13065/f12p0/1806	3	GO:0003993; acid phosphatase activity; molecular_function	GO:0046872; metal ion binding; molecular_function	GO:0016787; hydrolase activity; molecular_function
transcript_HQ_HBZL_transcript13066/f3p0/1829	2	GO:0005515; protein binding; molecular_function	GO:0000902; cell morphogenesis; biological_process
transcript_HQ_HBZL_transcript13069/f2p0/1831	2	GO:0008152; NA	GO:0016787; hydrolase activity; molecular_function
transcript_HQ_HBZL_transcript1307/f2p0/3610	1	GO:0005515; protein binding; molecular_function
transcript_HQ_HBZL_transcript13071/f9p0/1765	2	GO:0016021; integral to membrane; cellular_component	GO:0016020; membrane; cellular_component
transcript_HQ_HBZL_transcript13072/f5p0/1810	2	GO:0015031; protein transport; biological_process	GO:0016020; membrane; cellular_component
transcript_HQ_HBZL_transcript13073/f7p0/1817	7	GO:0006886; intracellular protein transport; biological_process	GO:0046983; protein dimerization activity; molecular_function	GO:0005249; voltage-gated potassium channel activity; molecular_function	GO:0030955; potassium ion binding; molecular_function	GO:0006813; potassium ion transport; biological_process	GO:0005741; mitochondrial outer membrane; cellular_component	GO:0016021; integral to membrane; cellular_component
transcript_HQ_HBZL_transcript13076/f3p0/1815	2	GO:0003824; NA	GO:0051536; iron-sulfur cluster binding; molecular_function
transcript_HQ_HBZL_transcript13079/f11p0/1812	3	GO:0016021; integral to membrane; cellular_component	GO:0005337; nucleoside transmembrane transporter activity; molecular_function	GO:0006810; transport; biological_process
transcript_HQ_HBZL_transcript13082/f10p0/1812	4	GO:0020037; heme binding; molecular_function	GO:0005506; iron ion binding; molecular_function	GO:0016705; oxidoreductase activity, acting on paired donors, with incorporation or reduction of molecular oxygen; molecular_function	GO:0055114; oxidation-reduction process; biological_process
transcript_HQ_HBZL_transcript13085/f5p0/1810	1	GO:0005524; ATP binding; molecular_function
transcript_HQ_HBZL_transcript13087/f2p0/1821	1	GO:0043565; sequence-specific DNA binding; molecular_function
transcript_HQ_HBZL_transcript1309/f4p0/3579	2	GO:0005509; calcium ion binding; molecular_function	GO:0004553; hydrolase activity, hydrolyzing O-glycosyl compounds; molecular_function
transcript_HQ_HBZL_transcript13091/f2p0/1812	4	GO:0004672; protein kinase activity; molecular_function	GO:0006468; protein phosphorylation; biological_process	GO:0004674; protein serine/threonine kinase activity; molecular_function	GO:0005524; ATP binding; molecular_function
transcript_HQ_HBZL_transcript13092/f11p0/1814	4	GO:0008270; zinc ion binding; molecular_function	GO:0005096; GTPase activator activity; molecular_function	GO:0005515; protein binding; molecular_function	GO:0005622; intracellular; cellular_component
transcript_HQ_HBZL_transcript13098/f8p0/1811	4	GO:0046872; metal ion binding; molecular_function	GO:0061630; NA	GO:0008270; zinc ion binding; molecular_function	GO:0005515; protein binding; molecular_function
transcript_HQ_HBZL_transcript131/f4p0/5610	1	GO:0005515; protein binding; molecular_function
transcript_HQ_HBZL_transcript13100/f3p0/1814	3	GO:0005524; ATP binding; molecular_function	GO:0006468; protein phosphorylation; biological_process	GO:0004672; protein kinase activity; molecular_function
transcript_HQ_HBZL_transcript13102/f9p0/1815	5	GO:0016020; membrane; cellular_component	GO:0003333; amino acid transmembrane transport; biological_process	GO:0015171; amino acid transmembrane transporter activity; molecular_function	GO:0006810; transport; biological_process	GO:0055085; transmembrane transport; biological_process
transcript_HQ_HBZL_transcript13106/f2p0/1827	2	GO:0016042; lipid catabolic process; biological_process	GO:0006629; lipid metabolic process; biological_process
transcript_HQ_HBZL_transcript13107/f2p0/1807	4	GO:0016705; oxidoreductase activity, acting on paired donors, with incorporation or reduction of molecular oxygen; molecular_function	GO:0055114; oxidation-reduction process; biological_process	GO:0005506; iron ion binding; molecular_function	GO:0020037; heme binding; molecular_function
transcript_HQ_HBZL_transcript1311/f2p0/3568	2	GO:0004553; hydrolase activity, hydrolyzing O-glycosyl compounds; molecular_function	GO:0005509; calcium ion binding; molecular_function
transcript_HQ_HBZL_transcript13112/f7p0/1679	1	GO:0003677; DNA binding; molecular_function
transcript_HQ_HBZL_transcript13113/f6p0/1808	1	GO:0071949; FAD binding; molecular_function
transcript_HQ_HBZL_transcript13115/f3p0/1804	8	GO:0006468; protein phosphorylation; biological_process	GO:0005506; iron ion binding; molecular_function	GO:0042597; periplasmic space; cellular_component	GO:0020037; heme binding; molecular_function	GO:0009055; NA	GO:0004672; protein kinase activity; molecular_function	GO:0022900; electron transport chain; biological_process	GO:0005524; ATP binding; molecular_function
transcript_HQ_HBZL_transcript13118/f5p0/1802	6	GO:0016616; oxidoreductase activity, acting on the CH-OH group of donors, NAD or NADP as acceptor; molecular_function	GO:0003854; 3-beta-hydroxy-delta5-steroid dehydrogenase activity; molecular_function	GO:0003824; NA	GO:0050662; coenzyme binding; molecular_function	GO:0055114; oxidation-reduction process; biological_process	GO:0006694; steroid biosynthetic process; biological_process
transcript_HQ_HBZL_transcript1312/f4p0/3571	1	GO:0005515; protein binding; molecular_function
transcript_HQ_HBZL_transcript13122/f2p0/1814	2	GO:0005975; carbohydrate metabolic process; biological_process	GO:0004553; hydrolase activity, hydrolyzing O-glycosyl compounds; molecular_function
transcript_HQ_HBZL_transcript13123/f2p0/1806	4	GO:0016021; integral to membrane; cellular_component	GO:0005515; protein binding; molecular_function	GO:0000155; two-component sensor activity; molecular_function	GO:0000160; two-component signal transduction system (phosphorelay); biological_process
transcript_HQ_HBZL_transcript13126/f2p0/1849	2	GO:0016758; transferase activity, transferring hexosyl groups; molecular_function	GO:0008152; NA
transcript_HQ_HBZL_transcript13129/f2p0/1810	1	GO:0005515; protein binding; molecular_function
transcript_HQ_HBZL_transcript13130/f3p0/1804	3	GO:0004177; aminopeptidase activity; molecular_function	GO:0008270; zinc ion binding; molecular_function	GO:0006508; proteolysis; biological_process
transcript_HQ_HBZL_transcript13131/f12p0/1803	1	GO:0005515; protein binding; molecular_function
transcript_HQ_HBZL_transcript13132/f2p0/1807	2	GO:0070403; NAD+ binding; molecular_function	GO:0005515; protein binding; molecular_function
transcript_HQ_HBZL_transcript13133/f3p0/1826	3	GO:0005515; protein binding; molecular_function	GO:0016844; strictosidine synthase activity; molecular_function	GO:0009058; biosynthetic process; biological_process
transcript_HQ_HBZL_transcript13134/f2p0/1802	1	GO:0005515; protein binding; molecular_function
transcript_HQ_HBZL_transcript13135/f3p0/1850	8	GO:0016151; nickel ion binding; molecular_function	GO:0005680; anaphase-promoting complex; cellular_component	GO:0004842; ubiquitin-protein ligase activity; molecular_function	GO:0046872; metal ion binding; molecular_function	GO:0035556; intracellular signal transduction; biological_process	GO:0008270; zinc ion binding; molecular_function	GO:0006464; protein modification process; biological_process	GO:0005515; protein binding; molecular_function
transcript_HQ_HBZL_transcript13137/f18p0/1799	5	GO:0003677; DNA binding; molecular_function	GO:0006952; defense response; biological_process	GO:0010215; cellulose microfibril organization; biological_process	GO:0031225; anchored to membrane; cellular_component	GO:0016049; cell growth; biological_process
transcript_HQ_HBZL_transcript13138/f14p0/1803	2	GO:0004478; methionine adenosyltransferase activity; molecular_function	GO:0006556; S-adenosylmethionine biosynthetic process; biological_process
transcript_HQ_HBZL_transcript13148/f9p0/1837	3	GO:0006810; transport; biological_process	GO:0003676; nucleic acid binding; molecular_function	GO:0005622; intracellular; cellular_component
transcript_HQ_HBZL_transcript13151/f16p0/1800	4	GO:0016705; oxidoreductase activity, acting on paired donors, with incorporation or reduction of molecular oxygen; molecular_function	GO:0055114; oxidation-reduction process; biological_process	GO:0020037; heme binding; molecular_function	GO:0005506; iron ion binding; molecular_function
transcript_HQ_HBZL_transcript13152/f4p0/1757	3	GO:0016337; cell-cell adhesion; biological_process	GO:0005515; protein binding; molecular_function	GO:0016020; membrane; cellular_component
transcript_HQ_HBZL_transcript13153/f4p0/1802	3	GO:0005515; protein binding; molecular_function	GO:0008270; zinc ion binding; molecular_function	GO:0003723; RNA binding; molecular_function
transcript_HQ_HBZL_transcript13155/f6p0/1809	4	GO:0004579; dolichyl-diphosphooligosaccharide-protein glycotransferase activity; molecular_function	GO:0006486; protein glycosylation; biological_process	GO:0005783; endoplasmic reticulum; cellular_component	GO:0016021; integral to membrane; cellular_component
transcript_HQ_HBZL_transcript13156/f3p0/1814	4	GO:0046873; metal ion transmembrane transporter activity; molecular_function	GO:0055085; transmembrane transport; biological_process	GO:0030001; metal ion transport; biological_process	GO:0016020; membrane; cellular_component
transcript_HQ_HBZL_transcript13158/f7p0/1774	7	GO:0003724; RNA helicase activity; molecular_function	GO:0003723; RNA binding; molecular_function	GO:0005524; ATP binding; molecular_function	GO:0098519; NA	GO:0005525; GTP binding; molecular_function	GO:0005515; protein binding; molecular_function	GO:0003924; GTPase activity; molecular_function
transcript_HQ_HBZL_transcript13159/f4p0/1802	2	GO:0008080; N-acetyltransferase activity; molecular_function	GO:0003824; NA
transcript_HQ_HBZL_transcript1316/f7p0/3563	5	GO:0006468; protein phosphorylation; biological_process	GO:0004672; protein kinase activity; molecular_function	GO:0005515; protein binding; molecular_function	GO:0016020; membrane; cellular_component	GO:0005524; ATP binding; molecular_function
transcript_HQ_HBZL_transcript13160/f3p0/1805	13	GO:0004743; pyruvate kinase activity; molecular_function	GO:0016491; oxidoreductase activity; molecular_function	GO:0003824; NA	GO:0030955; potassium ion binding; molecular_function	GO:0050660; flavin adenine dinucleotide binding; molecular_function	GO:0008033; tRNA processing; biological_process	GO:0055114; oxidation-reduction process; biological_process	GO:0017150; tRNA dihydrouridine synthase activity; molecular_function	GO:0018580; nitronate monooxygenase activity; molecular_function	GO:0004425; indole-3-glycerol-phosphate synthase activity; molecular_function	GO:0000287; magnesium ion binding; molecular_function	GO:0000105; histidine biosynthetic process; biological_process	GO:0006096; glycolysis; biological_process
transcript_HQ_HBZL_transcript13161/f3p0/1798	7	GO:0019898; extrinsic to membrane; cellular_component	GO:0015979; photosynthesis; biological_process	GO:0005509; calcium ion binding; molecular_function	GO:0009654; oxygen evolving complex; cellular_component	GO:0031072; heat shock protein binding; molecular_function	GO:0009523; photosystem II; cellular_component	GO:0051082; unfolded protein binding; molecular_function
transcript_HQ_HBZL_transcript13166/f11p0/1811	4	GO:0005524; ATP binding; molecular_function	GO:0003676; nucleic acid binding; molecular_function	GO:0003677; DNA binding; molecular_function	GO:0016787; hydrolase activity; molecular_function
transcript_HQ_HBZL_transcript13168/f2p0/1809	6	GO:0043565; sequence-specific DNA binding; molecular_function	GO:0006367; transcription initiation from RNA polymerase II promoter; biological_process	GO:0006260; DNA replication; biological_process	GO:0003700; sequence-specific DNA binding transcription factor activity; molecular_function	GO:0005672; transcription factor TFIIA complex; cellular_component	GO:0006355; regulation of transcription, DNA-dependent; biological_process
transcript_HQ_HBZL_transcript13169/f9p0/1811	8	GO:0016491; oxidoreductase activity; molecular_function	GO:0003824; NA	GO:0006694; steroid biosynthetic process; biological_process	GO:0055114; oxidation-reduction process; biological_process	GO:0050662; coenzyme binding; molecular_function	GO:0051287; NAD binding; molecular_function	GO:0003854; 3-beta-hydroxy-delta5-steroid dehydrogenase activity; molecular_function	GO:0016616; oxidoreductase activity, acting on the CH-OH group of donors, NAD or NADP as acceptor; molecular_function
transcript_HQ_HBZL_transcript13172/f19p0/1795	3	GO:0022857; transmembrane transporter activity; molecular_function	GO:0055085; transmembrane transport; biological_process	GO:0016021; integral to membrane; cellular_component
transcript_HQ_HBZL_transcript13173/f7p0/1805	1	GO:0003824; NA
transcript_HQ_HBZL_transcript13175/f3p0/1795	9	GO:0006359; regulation of transcription from RNA polymerase III promoter; biological_process	GO:0009036; Type II site-specific deoxyribonuclease activity; molecular_function	GO:0005666; DNA-directed RNA polymerase III complex; cellular_component	GO:0006383; transcription from RNA polymerase III promoter; biological_process	GO:0006355; regulation of transcription, DNA-dependent; biological_process	GO:0003899; DNA-directed RNA polymerase activity; molecular_function	GO:0003700; sequence-specific DNA binding transcription factor activity; molecular_function	GO:0003677; DNA binding; molecular_function	GO:0009307; DNA restriction-modification system; biological_process
transcript_HQ_HBZL_transcript13176/f2p0/1810	2	GO:0016866; intramolecular transferase activity; molecular_function	GO:0030244; cellulose biosynthetic process; biological_process
transcript_HQ_HBZL_transcript13178/f14p0/1792	4	GO:0005506; iron ion binding; molecular_function	GO:0020037; heme binding; molecular_function	GO:0016705; oxidoreductase activity, acting on paired donors, with incorporation or reduction of molecular oxygen; molecular_function	GO:0055114; oxidation-reduction process; biological_process
transcript_HQ_HBZL_transcript13181/f2p0/1809	4	GO:0016747; transferase activity, transferring acyl groups other than amino-acyl groups; molecular_function	GO:0016020; membrane; cellular_component	GO:0004315; 3-oxoacyl-[acyl-carrier-protein] synthase activity; molecular_function	GO:0006633; fatty acid biosynthetic process; biological_process
transcript_HQ_HBZL_transcript13184/f2p0/1808	1	GO:0003676; nucleic acid binding; molecular_function
transcript_HQ_HBZL_transcript13185/f3p0/1819	4	GO:0055114; oxidation-reduction process; biological_process	GO:0016705; oxidoreductase activity, acting on paired donors, with incorporation or reduction of molecular oxygen; molecular_function	GO:0020037; heme binding; molecular_function	GO:0005506; iron ion binding; molecular_function
transcript_HQ_HBZL_transcript13186/f4p0/1823	7	GO:0016887; ATPase activity; molecular_function	GO:0000166; nucleotide binding; molecular_function	GO:0005525; GTP binding; molecular_function	GO:0005524; ATP binding; molecular_function	GO:0031124; mRNA 3'-end processing; biological_process	GO:0006810; transport; biological_process	GO:0003677; DNA binding; molecular_function
transcript_HQ_HBZL_transcript13187/f2p0/1808	1	GO:0003676; nucleic acid binding; molecular_function
transcript_HQ_HBZL_transcript13188/f2p0/1806	4	GO:0016705; oxidoreductase activity, acting on paired donors, with incorporation or reduction of molecular oxygen; molecular_function	GO:0055114; oxidation-reduction process; biological_process	GO:0005506; iron ion binding; molecular_function	GO:0020037; heme binding; molecular_function
transcript_HQ_HBZL_transcript1319/f3p0/3586	1	GO:0003676; nucleic acid binding; molecular_function
transcript_HQ_HBZL_transcript13195/f17p0/1755	5	GO:0055085; transmembrane transport; biological_process	GO:0015238; drug transmembrane transporter activity; molecular_function	GO:0015297; antiporter activity; molecular_function	GO:0006855; drug transmembrane transport; biological_process	GO:0016020; membrane; cellular_component
transcript_HQ_HBZL_transcript13196/f2p0/1823	1	GO:0003676; nucleic acid binding; molecular_function
transcript_HQ_HBZL_transcript13199/f4p0/1830	2	GO:0030244; cellulose biosynthetic process; biological_process	GO:0016866; intramolecular transferase activity; molecular_function
transcript_HQ_HBZL_transcript132/f2p0/5647	3	GO:0005524; ATP binding; molecular_function	GO:0004672; protein kinase activity; molecular_function	GO:0006468; protein phosphorylation; biological_process
transcript_HQ_HBZL_transcript13202/f2p0/1831	1	GO:0016788; hydrolase activity, acting on ester bonds; molecular_function
transcript_HQ_HBZL_transcript13203/f11p0/1799	10	GO:0003857; 3-hydroxyacyl-CoA dehydrogenase activity; molecular_function	GO:0006631; fatty acid metabolic process; biological_process	GO:0045454; cell redox homeostasis; biological_process	GO:0016491; oxidoreductase activity; molecular_function	GO:0071949; FAD binding; molecular_function	GO:0016616; oxidoreductase activity, acting on the CH-OH group of donors, NAD or NADP as acceptor; molecular_function	GO:0051287; NAD binding; molecular_function	GO:0050660; flavin adenine dinucleotide binding; molecular_function	GO:0008033; tRNA processing; biological_process	GO:0055114; oxidation-reduction process; biological_process
transcript_HQ_HBZL_transcript13206/f3p0/1771	2	GO:0005525; GTP binding; molecular_function	GO:0003924; GTPase activity; molecular_function
transcript_HQ_HBZL_transcript13208/f3p0/1795	4	GO:0016705; oxidoreductase activity, acting on paired donors, with incorporation or reduction of molecular oxygen; molecular_function	GO:0055114; oxidation-reduction process; biological_process	GO:0020037; heme binding; molecular_function	GO:0005506; iron ion binding; molecular_function
transcript_HQ_HBZL_transcript1321/f2p0/3568	2	GO:0005634; nucleus; cellular_component	GO:0051726; regulation of cell cycle; biological_process
transcript_HQ_HBZL_transcript13212/f2p0/1808	3	GO:0005524; ATP binding; molecular_function	GO:0004672; protein kinase activity; molecular_function	GO:0006468; protein phosphorylation; biological_process
transcript_HQ_HBZL_transcript13214/f2p0/1799	3	GO:0016788; hydrolase activity, acting on ester bonds; molecular_function	GO:0003824; NA	GO:0008152; NA
transcript_HQ_HBZL_transcript13216/f13p0/1886	1	GO:0004781; sulfate adenylyltransferase (ATP) activity; molecular_function
transcript_HQ_HBZL_transcript13218/f2p0/1802	3	GO:0055114; oxidation-reduction process; biological_process	GO:0050660; flavin adenine dinucleotide binding; molecular_function	GO:0016491; oxidoreductase activity; molecular_function
transcript_HQ_HBZL_transcript13219/f7p0/1765	4	GO:0005506; iron ion binding; molecular_function	GO:0020037; heme binding; molecular_function	GO:0016705; oxidoreductase activity, acting on paired donors, with incorporation or reduction of molecular oxygen; molecular_function	GO:0055114; oxidation-reduction process; biological_process
transcript_HQ_HBZL_transcript1322/f3p0/3553	4	GO:0003779; actin binding; molecular_function	GO:0006260; DNA replication; biological_process	GO:0005634; nucleus; cellular_component	GO:0007010; cytoskeleton organization; biological_process
transcript_HQ_HBZL_transcript13221/f7p0/1814	3	GO:0006468; protein phosphorylation; biological_process	GO:0016773; phosphotransferase activity, alcohol group as acceptor; molecular_function	GO:0019748; secondary metabolic process; biological_process
transcript_HQ_HBZL_transcript13222/f3p0/1805	4	GO:0005795; Golgi stack; cellular_component	GO:0009312; oligosaccharide biosynthetic process; biological_process	GO:0008455; alpha-1,6-mannosylglycoprotein 2-beta-N-acetylglucosaminyltransferase activity; molecular_function	GO:0016021; integral to membrane; cellular_component
transcript_HQ_HBZL_transcript13224/f4p0/1812	4	GO:0005506; iron ion binding; molecular_function	GO:0020037; heme binding; molecular_function	GO:0055114; oxidation-reduction process; biological_process	GO:0016705; oxidoreductase activity, acting on paired donors, with incorporation or reduction of molecular oxygen; molecular_function
transcript_HQ_HBZL_transcript13227/f4p0/1773	1	GO:0003676; nucleic acid binding; molecular_function
transcript_HQ_HBZL_transcript13229/f6p0/1806	6	GO:0016567; protein ubiquitination; biological_process	GO:0008270; zinc ion binding; molecular_function	GO:0005515; protein binding; molecular_function	GO:0046872; metal ion binding; molecular_function	GO:0004842; ubiquitin-protein ligase activity; molecular_function	GO:0061630; NA
transcript_HQ_HBZL_transcript13230/f2p0/1807	2	GO:0009036; Type II site-specific deoxyribonuclease activity; molecular_function	GO:0009307; DNA restriction-modification system; biological_process
transcript_HQ_HBZL_transcript13232/f2p0/1803	1	GO:0046872; metal ion binding; molecular_function
transcript_HQ_HBZL_transcript13233/f4p0/1811	4	GO:0008270; zinc ion binding; molecular_function	GO:0005515; protein binding; molecular_function	GO:0016567; protein ubiquitination; biological_process	GO:0004842; ubiquitin-protein ligase activity; molecular_function
transcript_HQ_HBZL_transcript13236/f2p0/1806	4	GO:0016705; oxidoreductase activity, acting on paired donors, with incorporation or reduction of molecular oxygen; molecular_function	GO:0055114; oxidation-reduction process; biological_process	GO:0020037; heme binding; molecular_function	GO:0005506; iron ion binding; molecular_function
transcript_HQ_HBZL_transcript13239/f2p0/1806	3	GO:0016831; carboxy-lyase activity; molecular_function	GO:0019752; carboxylic acid metabolic process; biological_process	GO:0030170; pyridoxal phosphate binding; molecular_function
transcript_HQ_HBZL_transcript1324/f2p0/3564	9	GO:0016020; membrane; cellular_component	GO:0005524; ATP binding; molecular_function	GO:0043548; phosphatidylinositol 3-kinase binding; molecular_function	GO:0050776; regulation of immune response; biological_process	GO:0004672; protein kinase activity; molecular_function	GO:0005515; protein binding; molecular_function	GO:0006468; protein phosphorylation; biological_process	GO:0014068; positive regulation of phosphatidylinositol 3-kinase cascade; biological_process	GO:0005102; receptor binding; molecular_function
transcript_HQ_HBZL_transcript13241/f2p0/1793	2	GO:0016702; oxidoreductase activity, acting on single donors with incorporation of molecular oxygen, incorporation of two atoms of oxygen; molecular_function	GO:0055114; oxidation-reduction process; biological_process
transcript_HQ_HBZL_transcript13243/f5p0/1886	2	GO:0015018; galactosylgalactosylxylosylprotein 3-beta-glucuronosyltransferase activity; molecular_function	GO:0016020; membrane; cellular_component
transcript_HQ_HBZL_transcript13244/f3p0/1800	3	GO:0055114; oxidation-reduction process; biological_process	GO:0004733; pyridoxamine-phosphate oxidase activity; molecular_function	GO:0010181; FMN binding; molecular_function
transcript_HQ_HBZL_transcript13246/f4p0/1819	3	GO:0009058; biosynthetic process; biological_process	GO:0016844; strictosidine synthase activity; molecular_function	GO:0005515; protein binding; molecular_function
transcript_HQ_HBZL_transcript13248/f28p0/1778	3	GO:0055114; oxidation-reduction process; biological_process	GO:0005525; GTP binding; molecular_function	GO:0015948; methanogenesis; biological_process
transcript_HQ_HBZL_transcript1325/f2p0/3553	3	GO:0005515; protein binding; molecular_function	GO:0003677; DNA binding; molecular_function	GO:0005634; nucleus; cellular_component
transcript_HQ_HBZL_transcript13252/f6p0/1777	5	GO:0016020; membrane; cellular_component	GO:0006855; drug transmembrane transport; biological_process	GO:0015297; antiporter activity; molecular_function	GO:0015238; drug transmembrane transporter activity; molecular_function	GO:0055085; transmembrane transport; biological_process
transcript_HQ_HBZL_transcript13255/f2p0/1812	5	GO:0006855; drug transmembrane transport; biological_process	GO:0016020; membrane; cellular_component	GO:0015297; antiporter activity; molecular_function	GO:0015238; drug transmembrane transporter activity; molecular_function	GO:0055085; transmembrane transport; biological_process
transcript_HQ_HBZL_transcript13258/f4p0/1801	2	GO:0051082; unfolded protein binding; molecular_function	GO:0031072; heat shock protein binding; molecular_function
transcript_HQ_HBZL_transcript1326/f3p0/3571	3	GO:0005515; protein binding; molecular_function	GO:0008536; Ran GTPase binding; molecular_function	GO:0006886; intracellular protein transport; biological_process
transcript_HQ_HBZL_transcript13261/f2p0/1793	3	GO:0008270; zinc ion binding; molecular_function	GO:0004177; aminopeptidase activity; molecular_function	GO:0006508; proteolysis; biological_process
transcript_HQ_HBZL_transcript13265/f2p0/1807	5	GO:0004673; protein histidine kinase activity; molecular_function	GO:0000160; two-component signal transduction system (phosphorelay); biological_process	GO:0000155; two-component sensor activity; molecular_function	GO:0071555; cell wall organization; biological_process	GO:0016021; integral to membrane; cellular_component
transcript_HQ_HBZL_transcript13268/f2p0/1803	1	GO:0005515; protein binding; molecular_function
transcript_HQ_HBZL_transcript13269/f7p0/1798	4	GO:0005506; iron ion binding; molecular_function	GO:0020037; heme binding; molecular_function	GO:0016705; oxidoreductase activity, acting on paired donors, with incorporation or reduction of molecular oxygen; molecular_function	GO:0055114; oxidation-reduction process; biological_process
transcript_HQ_HBZL_transcript13273/f3p0/1809	2	GO:0009058; biosynthetic process; biological_process	GO:0016788; hydrolase activity, acting on ester bonds; molecular_function
transcript_HQ_HBZL_transcript13277/f5p0/1793	3	GO:0030244; cellulose biosynthetic process; biological_process	GO:0030247; polysaccharide binding; molecular_function	GO:0019867; outer membrane; cellular_component
transcript_HQ_HBZL_transcript13278/f2p0/1885	11	GO:0000776; kinetochore; cellular_component	GO:0043565; sequence-specific DNA binding; molecular_function	GO:0005634; nucleus; cellular_component	GO:0051382; kinetochore assembly; biological_process	GO:0006355; regulation of transcription, DNA-dependent; biological_process	GO:0006914; autophagy; biological_process	GO:0016021; integral to membrane; cellular_component	GO:0006260; DNA replication; biological_process	GO:0003700; sequence-specific DNA binding transcription factor activity; molecular_function	GO:0003677; DNA binding; molecular_function	GO:0007049; cell cycle; biological_process
transcript_HQ_HBZL_transcript1328/f8p0/3557	4	GO:0045040; protein import into mitochondrial outer membrane; biological_process	GO:0005515; protein binding; molecular_function	GO:0046983; protein dimerization activity; molecular_function	GO:0005742; mitochondrial outer membrane translocase complex; cellular_component
transcript_HQ_HBZL_transcript13281/f2p0/1789	2	GO:0055114; oxidation-reduction process; biological_process	GO:0016491; oxidoreductase activity; molecular_function
transcript_HQ_HBZL_transcript13283/f3p0/1787	4	GO:0005506; iron ion binding; molecular_function	GO:0020037; heme binding; molecular_function	GO:0055114; oxidation-reduction process; biological_process	GO:0016705; oxidoreductase activity, acting on paired donors, with incorporation or reduction of molecular oxygen; molecular_function
transcript_HQ_HBZL_transcript13287/f3p0/1789	5	GO:0004672; protein kinase activity; molecular_function	GO:0006468; protein phosphorylation; biological_process	GO:0016773; phosphotransferase activity, alcohol group as acceptor; molecular_function	GO:0005524; ATP binding; molecular_function	GO:0016020; membrane; cellular_component
transcript_HQ_HBZL_transcript13289/f2p0/1796	2	GO:0004553; hydrolase activity, hydrolyzing O-glycosyl compounds; molecular_function	GO:0005975; carbohydrate metabolic process; biological_process
transcript_HQ_HBZL_transcript1329/f2p0/3550	4	GO:0008270; zinc ion binding; molecular_function	GO:0043565; sequence-specific DNA binding; molecular_function	GO:0005634; nucleus; cellular_component	GO:0006355; regulation of transcription, DNA-dependent; biological_process
transcript_HQ_HBZL_transcript13291/f2p0/1774	4	GO:0055114; oxidation-reduction process; biological_process	GO:0016705; oxidoreductase activity, acting on paired donors, with incorporation or reduction of molecular oxygen; molecular_function	GO:0020037; heme binding; molecular_function	GO:0005506; iron ion binding; molecular_function
transcript_HQ_HBZL_transcript13296/f23p0/1747	2	GO:0006464; protein modification process; biological_process	GO:0015031; protein transport; biological_process
transcript_HQ_HBZL_transcript13298/f3p0/1794	4	GO:0005506; iron ion binding; molecular_function	GO:0020037; heme binding; molecular_function	GO:0055114; oxidation-reduction process; biological_process	GO:0016705; oxidoreductase activity, acting on paired donors, with incorporation or reduction of molecular oxygen; molecular_function
transcript_HQ_HBZL_transcript13301/f24p0/1790	6	GO:0045454; cell redox homeostasis; biological_process	GO:0016491; oxidoreductase activity; molecular_function	GO:0003824; NA	GO:0016209; NA	GO:0055114; oxidation-reduction process; biological_process	GO:0008152; NA
transcript_HQ_HBZL_transcript13303/f2p0/1791	4	GO:0046872; metal ion binding; molecular_function	GO:0050992; dimethylallyl diphosphate biosynthetic process; biological_process	GO:0051745; 4-hydroxy-3-methylbut-2-en-1-yl diphosphate reductase activity; molecular_function	GO:0019288; isopentenyl diphosphate biosynthetic process, mevalonate-independent pathway; biological_process
transcript_HQ_HBZL_transcript13307/f3p0/1792	3	GO:0005524; ATP binding; molecular_function	GO:0004672; protein kinase activity; molecular_function	GO:0006468; protein phosphorylation; biological_process
transcript_HQ_HBZL_transcript1331/f2p0/3581	1	GO:0003676; nucleic acid binding; molecular_function
transcript_HQ_HBZL_transcript13310/f2p0/1830	1	GO:0046983; protein dimerization activity; molecular_function
transcript_HQ_HBZL_transcript13319/f5p0/1792	4	GO:0020037; heme binding; molecular_function	GO:0005506; iron ion binding; molecular_function	GO:0055114; oxidation-reduction process; biological_process	GO:0016705; oxidoreductase activity, acting on paired donors, with incorporation or reduction of molecular oxygen; molecular_function
transcript_HQ_HBZL_transcript1332/f5p0/3582	2	GO:0043531; ADP binding; molecular_function	GO:0005515; protein binding; molecular_function
transcript_HQ_HBZL_transcript13320/f2p0/1793	1	GO:0005515; protein binding; molecular_function
transcript_HQ_HBZL_transcript13331/f2p0/1781	3	GO:0016491; oxidoreductase activity; molecular_function	GO:0055114; oxidation-reduction process; biological_process	GO:0008152; NA
transcript_HQ_HBZL_transcript13333/f13p0/1779	6	GO:0006694; steroid biosynthetic process; biological_process	GO:0055114; oxidation-reduction process; biological_process	GO:0050662; coenzyme binding; molecular_function	GO:0003854; 3-beta-hydroxy-delta5-steroid dehydrogenase activity; molecular_function	GO:0003824; NA	GO:0016616; oxidoreductase activity, acting on the CH-OH group of donors, NAD or NADP as acceptor; molecular_function
transcript_HQ_HBZL_transcript13334/f2p0/1793	4	GO:0016705; oxidoreductase activity, acting on paired donors, with incorporation or reduction of molecular oxygen; molecular_function	GO:0055114; oxidation-reduction process; biological_process	GO:0020037; heme binding; molecular_function	GO:0005506; iron ion binding; molecular_function
transcript_HQ_HBZL_transcript13335/f7p0/1793	2	GO:0005643; nuclear pore; cellular_component	GO:0046907; intracellular transport; biological_process
transcript_HQ_HBZL_transcript13338/f8p0/1792	5	GO:0055114; oxidation-reduction process; biological_process	GO:0016620; oxidoreductase activity, acting on the aldehyde or oxo group of donors, NAD or NADP as acceptor; molecular_function	GO:0008152; NA	GO:0051287; NAD binding; molecular_function	GO:0016491; oxidoreductase activity; molecular_function
transcript_HQ_HBZL_transcript1334/f2p0/3567	2	GO:0005975; carbohydrate metabolic process; biological_process	GO:0004553; hydrolase activity, hydrolyzing O-glycosyl compounds; molecular_function
transcript_HQ_HBZL_transcript13340/f5p0/1807	1	GO:0005515; protein binding; molecular_function
transcript_HQ_HBZL_transcript13341/f3p0/1791	5	GO:0008270; zinc ion binding; molecular_function	GO:0005515; protein binding; molecular_function	GO:0005680; anaphase-promoting complex; cellular_component	GO:0046872; metal ion binding; molecular_function	GO:0004842; ubiquitin-protein ligase activity; molecular_function
transcript_HQ_HBZL_transcript13345/f2p0/1803	14	GO:0016491; oxidoreductase activity; molecular_function	GO:0003824; NA	GO:0004743; pyruvate kinase activity; molecular_function	GO:0004425; indole-3-glycerol-phosphate synthase activity; molecular_function	GO:0000287; magnesium ion binding; molecular_function	GO:0006096; glycolysis; biological_process	GO:0017150; tRNA dihydrouridine synthase activity; molecular_function	GO:0018580; nitronate monooxygenase activity; molecular_function	GO:0055114; oxidation-reduction process; biological_process	GO:0005737; cytoplasm; cellular_component	GO:0016627; oxidoreductase activity, acting on the CH-CH group of donors; molecular_function	GO:0008033; tRNA processing; biological_process	GO:0050660; flavin adenine dinucleotide binding; molecular_function	GO:0030955; potassium ion binding; molecular_function
transcript_HQ_HBZL_transcript13346/f7p0/1786	4	GO:0055085; transmembrane transport; biological_process	GO:0006810; transport; biological_process	GO:0016021; integral to membrane; cellular_component	GO:0016020; membrane; cellular_component
transcript_HQ_HBZL_transcript13348/f2p0/1786	1	GO:0004781; sulfate adenylyltransferase (ATP) activity; molecular_function
transcript_HQ_HBZL_transcript13349/f2p0/1808	4	GO:0008378; galactosyltransferase activity; molecular_function	GO:0016757; transferase activity, transferring glycosyl groups; molecular_function	GO:0006486; protein glycosylation; biological_process	GO:0016020; membrane; cellular_component
transcript_HQ_HBZL_transcript1335/f3p0/3586	7	GO:0006402; mRNA catabolic process; biological_process	GO:0006109; regulation of carbohydrate metabolic process; biological_process	GO:0003676; nucleic acid binding; molecular_function	GO:0003723; RNA binding; molecular_function	GO:0006414; translational elongation; biological_process	GO:0005622; intracellular; cellular_component	GO:0003746; translation elongation factor activity; molecular_function
transcript_HQ_HBZL_transcript13352/f5p0/1796	3	GO:0008152; NA	GO:0055114; oxidation-reduction process; biological_process	GO:0016491; oxidoreductase activity; molecular_function
transcript_HQ_HBZL_transcript13354/f2p0/1795	8	GO:0003676; nucleic acid binding; molecular_function	GO:0003677; DNA binding; molecular_function	GO:0008270; zinc ion binding; molecular_function	GO:0006355; regulation of transcription, DNA-dependent; biological_process	GO:0006338; chromatin remodeling; biological_process	GO:0005634; nucleus; cellular_component	GO:0016818; hydrolase activity, acting on acid anhydrides, in phosphorus-containing anhydrides; molecular_function	GO:0005524; ATP binding; molecular_function
transcript_HQ_HBZL_transcript13356/f2p0/1835	4	GO:0016705; oxidoreductase activity, acting on paired donors, with incorporation or reduction of molecular oxygen; molecular_function	GO:0055114; oxidation-reduction process; biological_process	GO:0020037; heme binding; molecular_function	GO:0005506; iron ion binding; molecular_function
transcript_HQ_HBZL_transcript13360/f2p0/1792	2	GO:0004421; hydroxymethylglutaryl-CoA synthase activity; molecular_function	GO:0008299; isoprenoid biosynthetic process; biological_process
transcript_HQ_HBZL_transcript13361/f2p0/1811	3	GO:0005524; ATP binding; molecular_function	GO:0004672; protein kinase activity; molecular_function	GO:0006468; protein phosphorylation; biological_process
transcript_HQ_HBZL_transcript13364/f3p0/1745	4	GO:0020037; heme binding; molecular_function	GO:0005506; iron ion binding; molecular_function	GO:0055114; oxidation-reduction process; biological_process	GO:0016705; oxidoreductase activity, acting on paired donors, with incorporation or reduction of molecular oxygen; molecular_function
transcript_HQ_HBZL_transcript13365/f2p0/1810	1	GO:0005515; protein binding; molecular_function
transcript_HQ_HBZL_transcript13366/f5p0/1800	5	GO:0016209; NA	GO:0035556; intracellular signal transduction; biological_process	GO:0016491; oxidoreductase activity; molecular_function	GO:0045454; cell redox homeostasis; biological_process	GO:0055114; oxidation-reduction process; biological_process
transcript_HQ_HBZL_transcript13369/f2p0/1791	3	GO:0016021; integral to membrane; cellular_component	GO:0006621; protein retention in ER lumen; biological_process	GO:0046923; ER retention sequence binding; molecular_function
transcript_HQ_HBZL_transcript1337/f2p0/3555	4	GO:0004672; protein kinase activity; molecular_function	GO:0006468; protein phosphorylation; biological_process	GO:0005524; ATP binding; molecular_function	GO:0005515; protein binding; molecular_function
transcript_HQ_HBZL_transcript13371/f2p0/1786	4	GO:0007165; signal transduction; biological_process	GO:0006468; protein phosphorylation; biological_process	GO:0004672; protein kinase activity; molecular_function	GO:0005524; ATP binding; molecular_function
transcript_HQ_HBZL_transcript13375/f4p0/1796	1	GO:0005515; protein binding; molecular_function
transcript_HQ_HBZL_transcript13380/f2p0/1797	4	GO:0055085; transmembrane transport; biological_process	GO:0008324; cation transmembrane transporter activity; molecular_function	GO:0006812; cation transport; biological_process	GO:0016021; integral to membrane; cellular_component
transcript_HQ_HBZL_transcript13384/f6p0/1761	2	GO:0004185; serine-type carboxypeptidase activity; molecular_function	GO:0006508; proteolysis; biological_process
transcript_HQ_HBZL_transcript13388/f2p0/1783	1	GO:0005515; protein binding; molecular_function
transcript_HQ_HBZL_transcript13390/f3p0/1785	1	GO:0003676; nucleic acid binding; molecular_function
transcript_HQ_HBZL_transcript13394/f13p0/1723	4	GO:0003723; RNA binding; molecular_function	GO:0016788; hydrolase activity, acting on ester bonds; molecular_function	GO:0009405; pathogenesis; biological_process	GO:0043022; ribosome binding; molecular_function
transcript_HQ_HBZL_transcript13397/f9p0/1802	1	GO:0005515; protein binding; molecular_function
transcript_HQ_HBZL_transcript134/f2p0/5614	1	GO:0005515; protein binding; molecular_function
transcript_HQ_HBZL_transcript1340/f9p0/3567	2	GO:0003824; NA	GO:0005992; trehalose biosynthetic process; biological_process
transcript_HQ_HBZL_transcript13402/f4p0/1823	3	GO:0006355; regulation of transcription, DNA-dependent; biological_process	GO:0046417; chorismate metabolic process; biological_process	GO:0005515; protein binding; molecular_function
transcript_HQ_HBZL_transcript13403/f2p0/1748	11	GO:0003854; 3-beta-hydroxy-delta5-steroid dehydrogenase activity; molecular_function	GO:0051287; NAD binding; molecular_function	GO:0016616; oxidoreductase activity, acting on the CH-OH group of donors, NAD or NADP as acceptor; molecular_function	GO:0009089; lysine biosynthetic process via diaminopimelate; biological_process	GO:0016620; oxidoreductase activity, acting on the aldehyde or oxo group of donors, NAD or NADP as acceptor; molecular_function	GO:0055114; oxidation-reduction process; biological_process	GO:0006694; steroid biosynthetic process; biological_process	GO:0008839; dihydrodipicolinate reductase activity; molecular_function	GO:0050662; coenzyme binding; molecular_function	GO:0003824; NA	GO:0016491; oxidoreductase activity; molecular_function
transcript_HQ_HBZL_transcript13404/f2p0/1774	4	GO:0016192; vesicle-mediated transport; biological_process	GO:0005198; NA	GO:0006886; intracellular protein transport; biological_process	GO:0030117; membrane coat; cellular_component
transcript_HQ_HBZL_transcript13405/f3p0/1780	1	GO:0005515; protein binding; molecular_function
transcript_HQ_HBZL_transcript13407/f4p0/1817	2	GO:0016021; integral to membrane; cellular_component	GO:0016757; transferase activity, transferring glycosyl groups; molecular_function
transcript_HQ_HBZL_transcript13408/f3p0/1763	2	GO:0016597; amino acid binding; molecular_function	GO:0008152; NA
transcript_HQ_HBZL_transcript13409/f2p0/1787	11	GO:0042803; protein homodimerization activity; molecular_function	GO:0006914; autophagy; biological_process	GO:0008289; lipid binding; molecular_function	GO:0006457; protein folding; biological_process	GO:0000774; adenyl-nucleotide exchange factor activity; molecular_function	GO:0006869; lipid transport; biological_process	GO:0005576; NA	GO:0006886; intracellular protein transport; biological_process	GO:0051087; chaperone binding; molecular_function	GO:0005622; intracellular; cellular_component	GO:0042157; lipoprotein metabolic process; biological_process
transcript_HQ_HBZL_transcript1341/f2p0/3559	15	GO:0004252; serine-type endopeptidase activity; molecular_function	GO:0002949; NA	GO:0004127; cytidylate kinase activity; molecular_function	GO:0006139; nucleobase, nucleoside, nucleotide and nucleic acid metabolic process; biological_process	GO:0004176; ATP-dependent peptidase activity; molecular_function	GO:0003723; RNA binding; molecular_function	GO:0006310; DNA recombination; biological_process	GO:0016887; ATPase activity; molecular_function	GO:0009378; four-way junction helicase activity; molecular_function	GO:0098519; NA	GO:0005524; ATP binding; molecular_function	GO:0003678; DNA helicase activity; molecular_function	GO:0006508; proteolysis; biological_process	GO:0003724; RNA helicase activity; molecular_function	GO:0006281; DNA repair; biological_process
transcript_HQ_HBZL_transcript13410/f2p0/1788	2	GO:0003676; nucleic acid binding; molecular_function	GO:0003723; RNA binding; molecular_function
transcript_HQ_HBZL_transcript13412/f2p0/1787	4	GO:0055114; oxidation-reduction process; biological_process	GO:0016491; oxidoreductase activity; molecular_function	GO:0051287; NAD binding; molecular_function	GO:0006520; cellular amino acid metabolic process; biological_process
transcript_HQ_HBZL_transcript13414/f2p0/1805	4	GO:0061630; NA	GO:0046872; metal ion binding; molecular_function	GO:0005515; protein binding; molecular_function	GO:0008270; zinc ion binding; molecular_function
transcript_HQ_HBZL_transcript13416/f5p0/1803	3	GO:0005524; ATP binding; molecular_function	GO:0006468; protein phosphorylation; biological_process	GO:0004672; protein kinase activity; molecular_function
transcript_HQ_HBZL_transcript13418/f12p0/1782	3	GO:0004014; adenosylmethionine decarboxylase activity; molecular_function	GO:0008295; spermidine biosynthetic process; biological_process	GO:0006597; spermine biosynthetic process; biological_process
transcript_HQ_HBZL_transcript13419/f6p0/1799	5	GO:0008168; methyltransferase activity; molecular_function	GO:0016021; integral to membrane; cellular_component	GO:0016020; membrane; cellular_component	GO:0015095; magnesium ion transmembrane transporter activity; molecular_function	GO:0015693; magnesium ion transport; biological_process
transcript_HQ_HBZL_transcript1342/f3p0/3563	1	GO:0046872; metal ion binding; molecular_function
transcript_HQ_HBZL_transcript13428/f10p0/1803	4	GO:0003677; DNA binding; molecular_function	GO:0016787; hydrolase activity; molecular_function	GO:0003676; nucleic acid binding; molecular_function	GO:0005524; ATP binding; molecular_function
transcript_HQ_HBZL_transcript13429/f5p0/1775	2	GO:0009247; glycolipid biosynthetic process; biological_process	GO:0016758; transferase activity, transferring hexosyl groups; molecular_function
transcript_HQ_HBZL_transcript13430/f2p0/1780	2	GO:0016021; integral to membrane; cellular_component	GO:0003824; NA
transcript_HQ_HBZL_transcript13434/f3p0/1797	7	GO:0005737; cytoplasm; cellular_component	GO:0004535; poly(A)-specific ribonuclease activity; molecular_function	GO:0003723; RNA binding; molecular_function	GO:0006402; mRNA catabolic process; biological_process	GO:0003676; nucleic acid binding; molecular_function	GO:0046872; metal ion binding; molecular_function	GO:0005634; nucleus; cellular_component
transcript_HQ_HBZL_transcript13436/f2p0/1773	4	GO:0004672; protein kinase activity; molecular_function	GO:0006468; protein phosphorylation; biological_process	GO:0005524; ATP binding; molecular_function	GO:0005515; protein binding; molecular_function
transcript_HQ_HBZL_transcript1344/f2p0/3566	2	GO:0000166; nucleotide binding; molecular_function	GO:0046872; metal ion binding; molecular_function
transcript_HQ_HBZL_transcript13441/f2p0/1783	1	GO:0005515; protein binding; molecular_function
transcript_HQ_HBZL_transcript13442/f7p0/1787	4	GO:0030170; pyridoxal phosphate binding; molecular_function	GO:0016829; lyase activity; molecular_function	GO:0009058; biosynthetic process; biological_process	GO:0006520; cellular amino acid metabolic process; biological_process
transcript_HQ_HBZL_transcript13446/f2p0/1792	1	GO:0009976; tocopherol cyclase activity; molecular_function
transcript_HQ_HBZL_transcript13448/f2p0/1780	3	GO:0003676; nucleic acid binding; molecular_function	GO:0005886; plasma membrane; cellular_component	GO:0016021; integral to membrane; cellular_component
transcript_HQ_HBZL_transcript13450/f3p0/1719	3	GO:0008270; zinc ion binding; molecular_function	GO:0005515; protein binding; molecular_function	GO:0046872; metal ion binding; molecular_function
transcript_HQ_HBZL_transcript13451/f5p0/1782	1	GO:0016226; iron-sulfur cluster assembly; biological_process
transcript_HQ_HBZL_transcript13454/f3p0/1809	3	GO:0008152; NA	GO:0055114; oxidation-reduction process; biological_process	GO:0016491; oxidoreductase activity; molecular_function
transcript_HQ_HBZL_transcript13456/f25p0/1762	4	GO:0005506; iron ion binding; molecular_function	GO:0020037; heme binding; molecular_function	GO:0016705; oxidoreductase activity, acting on paired donors, with incorporation or reduction of molecular oxygen; molecular_function	GO:0055114; oxidation-reduction process; biological_process
transcript_HQ_HBZL_transcript13457/f2p0/1805	1	GO:0005515; protein binding; molecular_function
transcript_HQ_HBZL_transcript13458/f2p0/1790	4	GO:0005576; NA	GO:0005524; ATP binding; molecular_function	GO:0006468; protein phosphorylation; biological_process	GO:0004672; protein kinase activity; molecular_function
transcript_HQ_HBZL_transcript13459/f23p0/1777	4	GO:0055114; oxidation-reduction process; biological_process	GO:0016705; oxidoreductase activity, acting on paired donors, with incorporation or reduction of molecular oxygen; molecular_function	GO:0005506; iron ion binding; molecular_function	GO:0020037; heme binding; molecular_function
transcript_HQ_HBZL_transcript13461/f3p0/1792	2	GO:0016740; transferase activity; molecular_function	GO:0009058; biosynthetic process; biological_process
transcript_HQ_HBZL_transcript13462/f3p0/1787	1	GO:0005515; protein binding; molecular_function
transcript_HQ_HBZL_transcript13465/f2p0/1794	2	GO:0006541; glutamine metabolic process; biological_process	GO:0016787; hydrolase activity; molecular_function
transcript_HQ_HBZL_transcript13466/f2p0/1777	1	GO:0006352; transcription initiation, DNA-dependent; biological_process
transcript_HQ_HBZL_transcript13468/f3p0/1809	1	GO:0005509; calcium ion binding; molecular_function
transcript_HQ_HBZL_transcript13470/f3p0/1781	6	GO:0050662; coenzyme binding; molecular_function	GO:0055114; oxidation-reduction process; biological_process	GO:0006694; steroid biosynthetic process; biological_process	GO:0016616; oxidoreductase activity, acting on the CH-OH group of donors, NAD or NADP as acceptor; molecular_function	GO:0003824; NA	GO:0003854; 3-beta-hydroxy-delta5-steroid dehydrogenase activity; molecular_function
transcript_HQ_HBZL_transcript13474/f4p0/1815	7	GO:0005524; ATP binding; molecular_function	GO:0016020; membrane; cellular_component	GO:0004672; protein kinase activity; molecular_function	GO:0004601; peroxidase activity; molecular_function	GO:0006468; protein phosphorylation; biological_process	GO:0007165; signal transduction; biological_process	GO:0016773; phosphotransferase activity, alcohol group as acceptor; molecular_function
transcript_HQ_HBZL_transcript13475/f2p0/1823	4	GO:0016705; oxidoreductase activity, acting on paired donors, with incorporation or reduction of molecular oxygen; molecular_function	GO:0055114; oxidation-reduction process; biological_process	GO:0005506; iron ion binding; molecular_function	GO:0020037; heme binding; molecular_function
transcript_HQ_HBZL_transcript13480/f2p0/1780	3	GO:0004672; protein kinase activity; molecular_function	GO:0006468; protein phosphorylation; biological_process	GO:0005524; ATP binding; molecular_function
transcript_HQ_HBZL_transcript13481/f2p0/1825	1	GO:0003824; NA
transcript_HQ_HBZL_transcript13485/f3p0/1784	5	GO:0032183; SUMO binding; molecular_function	GO:0005515; protein binding; molecular_function	GO:0016579; protein deubiquitination; biological_process	GO:0070140; SUMO-specific isopeptidase activity; molecular_function	GO:0036459; NA
transcript_HQ_HBZL_transcript13488/f2p0/1781	1	GO:0005515; protein binding; molecular_function
transcript_HQ_HBZL_transcript13490/f2p0/1774	6	GO:0006979; response to oxidative stress; biological_process	GO:0047396; glycosylphosphatidylinositol diacylglycerol-lyase activity; molecular_function	GO:0055114; oxidation-reduction process; biological_process	GO:0006650; glycerophospholipid metabolic process; biological_process	GO:0004601; peroxidase activity; molecular_function	GO:0020037; heme binding; molecular_function
transcript_HQ_HBZL_transcript13493/f2p0/1778	1	GO:0044237; cellular metabolic process; biological_process
transcript_HQ_HBZL_transcript13494/f2p0/1801	1	GO:0016055; Wnt receptor signaling pathway; biological_process
[truncated: 8,775 more rows]
[truncated: 18 more columns]

## Sheet: SCEZ
Gene_id	GO_number	GO_id; GO_description; GO_class
transcript_HQ_SCEZ_transcript0/f3p0/13093	2	GO:0000266; mitochondrial fission; biological_process	GO:0005739; mitochondrion; cellular_component
[truncated: 10,937 more rows]
[truncated: 7 more columns]

## Sheet: SCJY
Gene_id	GO_number	GO_id; GO_description; GO_class
[truncated: 9,443 more rows]
[truncated: 19 more columns]

## Sheet: YNLB
Gene_id	GO_number	GO_id; GO_description; GO_class
[truncated: 9,193 more rows]
[truncated: 14 more columns]

## Sheet: YNMLP
Gene_id	GO_number	GO_id; GO_description; GO_class
[truncated: 9,862 more rows]
[truncated: 12 more columns]
