# Supplementary material for: Dissection of full-length transcriptome and metabolome of Dichocarpum (Ranunculaceae): implications in evolution of specialized metabolism of Ranunculales medicinal plants
Source: PeerJ journal article supplement (doi:10.7717/peerj.12428), 2021-11-05
Supplement: Table_S4_TFs,revis03.xlsx [file Table_S4_TFs%2Crevis03.xlsx]

## Sheet: Sheet1
Table S4 Number of predicted TFs based on full length transcriptome of five Dichocarpum species
	SCEZ	HBZL	SCJY	YNMLP	YNLB
WRKY	64	62	59	40	37
AP2/ERF-ERF	62	63	62	55	47
bZIP	61	45	47	44	47
C2H2	57	48	36	35	36
C3H	50	57	46	48	37
bHLH	48	49	41	38	51
GRAS	42	32	33	34	29
NAC	37	42	48	42	43
MYB	33	33	28	24	24
MYB-related	31	25	27	26	23
Others	26	39	23	28	32
GARP-G2-like	26	18	15	14	10
Trihelix	25	23	19	16	19
SET	24	16	0	14	10
SNF2	24	13	19	26	33
C2C2-GATA	22	19	11	11	0
HB-HD-ZIP	22	25	18	23	24
B3-ARF	22	20	18	26	18
FAR1	21	0	0	19	14
TRAF	21	12	0	15	16
PHD	19	15	10	16	0
IWS1	19	14	11	15	16
HSF	19	18	16	18	18
Tify	17	18	31	31	25
TUB	15	14	16	0	16
HB-BELL	15	0	22	17	17
AUX/IAA	15	22	16	24	20
TCP	15	12	10	0	0
GNAT	14	16	0	0	0
Jumonji	0	12	16	17	15
C2C2-Dof	0	14	10	0	0
C2C2-CO-like	0	0	11	0	0
SBP	0	0	14	11	12
B3	0	0	0	12	13
