# Supplementary material for: Dissection of full-length transcriptome and metabolome of Dichocarpum (Ranunculaceae): implications in evolution of specialized metabolism of Ranunculales medicinal plants
Source: PeerJ journal article supplement (doi:10.7717/peerj.12428), 2021-11-05
Supplement: Table_S6,expression,annotation,merged_transcript_dataset.xlsx [file Table_S6%2Cexpression%2Cannotation%2Cmerged_transcript_dataset.xlsx]

## Sheet: Readcount_FPKM_Anno
Table S6 Expression and annotation of 56,592 merged transcripts of five Dichocarpum species
geneid	genelen	hbzl.readcount	scez.readcount	scjy.readcount	ynlb.readcount	ynmlp.readcount	hbzl.fpkm	scez.fpkm	scjy.fpkm	ynlb.fpkm	ynmlp.fpkm	{nr}	{SwissProt}	{KEGG}	{KOG}	{GO}	{nt}	{pfam}
transcript_HQ_HBZL_transcript0/f2p0/10129	10129	2013.86	0	0	0	0	10.61	0	0	0	0	{NA}	{NA}	{NA}	{NA}	{NA}	{XM_010662561.2; PREDICTED: Vitis vinifera golgin subfamily B member 1 (LOC100264483), transcript variant X5, mRNA}	{NA}
transcript_HQ_HBZL_transcript10003/f2p0/2037	2037	794.13	0	0	0	0	22.99	0	0	0	0	{XP_010254685.1; PREDICTED: 3-epi-6-deoxocathasterone 23-monooxygenase [Nelumbo nucifera]}	{sp|Q9M066|C90C1_ARATH; 3-epi-6-deoxocathasterone 23-monooxygenase OS=Arabidopsis thaliana GN=ROT3 PE=2 SV=3}	{nnu:104595594; K12637 CYP90C1, ROT3 3-epi-6-deoxocathasterone 23-monooxygenase 1.14.13.112 ko00905; Metabolism; Metabolism of terpenoids and polyketides; Brassinosteroid biosynthesis}	{At4g36380; KOG0157 Cytochrome P450 CYP4/CYP19/CYP26 subfamilies QI Secondary metabolites biosynthesis, transport and catabolism ; Lipid transport and metabolism ;}	{GO:0055114; oxidation-reduction process; biological_process GO:0016705; oxidoreductase activity, acting on paired donors, with incorporation or reduction of molecular oxygen; molecular_function GO:0020037; heme binding; molecular_function GO:0005506; iron ion binding; molecular_function}	{XM_015720761.1; PREDICTED: Ricinus communis 3-epi-6-deoxocathasterone 23-monooxygenase (LOC8279118), mRNA}	{PF00067:Cytochrome P450}
transcript_HQ_HBZL_transcript10004/f2p0/2042	2042	356.2	0	2.96	0	0	10.28	0	0.09	0	0	{XP_015886573.1; PREDICTED: salicylic acid-binding protein 2-like [Ziziphus jujuba]}	{sp|Q8S8S9|MES1_ARATH; Methylesterase 1 OS=Arabidopsis thaliana GN=MES1 PE=1 SV=1}	{nnu:104595862; K08233 E3.1.1.78 polyneuridine-aldehyde esterase 3.1.1.78 ko00901; Metabolism; Biosynthesis of other secondary metabolites; Indole alkaloid biosynthesis}	{NA}	{GO:0016788; hydrolase activity, acting on ester bonds; molecular_function GO:0006629; lipid metabolic process; biological_process GO:0008374; O-acyltransferase activity; molecular_function GO:0009058; biosynthetic process; biological_process GO:0016787; hydrolase activity; molecular_function}	{NA}	{PF06821:Serine hydrolase PF02450:Lecithin:cholesterol acyltransferase PF07819:PGAP1-like protein PF00975:Thioesterase domain}
transcript_HQ_HBZL_transcript10007/f2p0/2041	2042	125.1	29.59	4	0	1	3.61	0.81	0.12	0	0.03	{ONK66443.1; uncharacterized protein A4U43_C06F8090 [Asparagus officinalis]}	{sp|P29341|PABP1_MOUSE; Polyadenylate-binding protein 1 OS=Mus musculus GN=Pabpc1 PE=1 SV=2}	{pvu:PHAVU_008G098700g; K13126 PABPC polyadenylate-binding protein - ko03013; Genetic Information Processing; Translation; RNA transport | ko03015; Genetic Information Processing; Translation; mRNA surveillance pathway | ko03018; Genetic Information Processing; Folding, sorting and degradation; RNA degradation}	{CE03230; KOG0123 Polyadenylate-binding protein (RRM superfamily) AJ RNA processing and modification ; Translation, ribosomal structure and biogenesis ;}	{GO:0003676; nucleic acid binding; molecular_function}	{NA}	{PF00076:RNA recognition motif. (a.k.a. RRM, RBD, or RNP domain)}
transcript_HQ_HBZL_transcript10008/f4p0/2038	2038	630.25	19.81	4.6	0	0	18.23	0.54	0.13	0	0	{XP_010258215.1; PREDICTED: probable WRKY transcription factor 3 isoform X1 [Nelumbo nucifera]}	{sp|Q9XI90|WRKY4_ARATH; Probable WRKY transcription factor 4 OS=Arabidopsis thaliana GN=WRKY4 PE=1 SV=2}	{nnu:104598039; - - - - -}	{NA}	{GO:0043565; sequence-specific DNA binding; molecular_function GO:0006355; regulation of transcription, DNA-dependent; biological_process GO:0003700; sequence-specific DNA binding transcription factor activity; molecular_function}	{XM_010260422.2; PREDICTED: Nelumbo nucifera probable WRKY transcription factor 4 (LOC104598386), mRNA}	{PF03106:WRKY DNA -binding domain}
transcript_HQ_HBZL_transcript10010/f11p0/2008	2008	1183	1	370.69	582.17	607.77	34.81	0.03	10.9	19.3	18.46	{XP_015891297.1; PREDICTED: pre-mRNA-splicing factor SLU7-A [Ziziphus jujuba]}	{sp|Q9SHY8|SLU7A_ARATH; Pre-mRNA-splicing factor SLU7-A OS=Arabidopsis thaliana GN=At1g65660 PE=1 SV=2}	{egr:104427996; K12819 SLU7 pre-mRNA-processing factor SLU7 - ko03040; Genetic Information Processing; Transcription; Spliceosome}	{At1g65660; KOG2560 RNA splicing factor - Slu7p A RNA processing and modification ;}	{NA}	{XM_010270578.2; PREDICTED: Nelumbo nucifera pre-mRNA-splicing factor SLU7 (LOC104605711), mRNA}	{NA}
transcript_HQ_HBZL_transcript10012/f4p0/2039	2039	764	0	1.96	0	0	22.09	0	0.06	0	0	{XP_010261619.1; PREDICTED: DEAD-box ATP-dependent RNA helicase 5 [Nelumbo nucifera]}	{sp|Q6YS30|RH5_ORYSJ; DEAD-box ATP-dependent RNA helicase 5 OS=Oryza sativa subsp. japonica GN=Os07g0301200 PE=2 SV=1}	{egu:105043970; K14811 DBP3 ATP-dependent RNA helicase DBP3 3.6.4.13 -}	{At1g31970; KOG0331 ATP-dependent RNA helicase A RNA processing and modification ;}	{GO:0016020; membrane; cellular_component GO:0030001; metal ion transport; biological_process GO:0046873; metal ion transmembrane transporter activity; molecular_function GO:0003676; nucleic acid binding; molecular_function GO:0005634; nucleus; cellular_component GO:0055085; transmembrane transport; biological_process GO:0005524; ATP binding; molecular_function GO:0009890; negative regulation of …	{XM_010263318.2; PREDICTED: Nelumbo nucifera DEAD-box ATP-dependent RNA helicase 5 (LOC104600395), transcript variant X2, mRNA}	{PF06399:GTP cyclohydrolase I feedback regulatory protein (GFRP) PF06862:Utp25, U3 small nucleolar RNA-associated SSU processome protein 25 PF00270:DEAD/DEAH box helicase PF02535:ZIP Zinc transporter}
transcript_HQ_HBZL_transcript10013/f2p0/2036	2036	138	6	2	0	0	4	0.16	0.06	0	0	{CAJ44461.1; sialyltransferase like protein [Aquilegia formosa x Aquilegia pubescens]}	{sp|Q8VZJ0|SIA1_ARATH; Sialyltransferase-like protein 1 OS=Arabidopsis thaliana GN=SIA1 PE=2 SV=1}	{nnu:104591853; - - - - -}	{At1g08660; KOG2692 Sialyltransferase G Carbohydrate transport and metabolism ;}	{GO:0008373; sialyltransferase activity; molecular_function GO:0006486; protein glycosylation; biological_process}	{AM167923.1; Aquilegia formosa x Aquilegia pubescens mRNA for sialyltransferase like protein (stv3 gene)}	{PF00777:Glycosyltransferase family 29 (sialyltransferase)}
transcript_HQ_HBZL_transcript10014/f2p0/2042	2042	205.08	0	0	0	0	5.92	0	0	0	0	{XP_010264924.1; PREDICTED: heterogeneous nuclear ribonucleoprotein 1-like [Nelumbo nucifera]}	{sp|Q8W034|RNP1_ARATH; Heterogeneous nuclear ribonucleoprotein 1 OS=Arabidopsis thaliana GN=RNP1 PE=1 SV=1}	{pmum:103323915; K14411 MSI RNA-binding protein Musashi - ko03015; Genetic Information Processing; Translation; mRNA surveillance pathway}	{At2g33410; KOG4205 RNA-binding protein musashi/mRNA cleavage and polyadenylation factor I complex, subunit HRP1 A RNA processing and modification ;}	{GO:0003676; nucleic acid binding; molecular_function}	{XR_735800.2; PREDICTED: Nelumbo nucifera heterogeneous nuclear ribonucleoprotein 1 (LOC104600945), transcript variant X2, misc_RNA}	{PF00076:RNA recognition motif. (a.k.a. RRM, RBD, or RNP domain) PF16367:RNA recognition motif}
transcript_HQ_HBZL_transcript10015/f3p0/2043	2043	1015.99	4.02	6.01	6.31	10.44	29.31	0.11	0.17	0.21	0.31	{CBI20607.3; unnamed protein product, partial [Vitis vinifera]}	{sp|Q8VY07|EPN1_ARATH; Clathrin interactor EPSIN 1 OS=Arabidopsis thaliana GN=EPSIN1 PE=1 SV=1}	{pxb:103951764; K12471 EPN epsin - ko04144; Cellular Processes; Transport and catabolism; Endocytosis}	{At5g11710; KOG2056 Equilibrative nucleoside transporter protein F Nucleotide transport and metabolism ;}	{GO:0005543; phospholipid binding; molecular_function GO:0005975; carbohydrate metabolic process; biological_process GO:0008810; cellulase activity; molecular_function}	{XM_019602525.1; PREDICTED: Lupinus angustifolius clathrin interactor EPSIN 1 (LOC109358352), mRNA}	{PF02015:Glycosyl hydrolase family 45 PF07651:ANTH domain}
transcript_HQ_HBZL_transcript10016/f13p0/2063	2063	795.89	0	0	0	0	22.71	0	0	0	0	{ABS18382.1; 3-ketoacyl-CoA synthase [Eranthis hyemalis]}	{sp|Q9LN49|KCS4_ARATH; 3-ketoacyl-CoA synthase 4 OS=Arabidopsis thaliana GN=KCS4 PE=2 SV=1}	{nnu:104595997; K15397 KCS 3-ketoacyl-CoA synthase 2.3.1.199 ko00062; Metabolism; Lipid metabolism; Fatty acid elongation}	{NA}	{GO:0004315; 3-oxoacyl-[acyl-carrier-protein] synthase activity; molecular_function GO:0016021; integral to membrane; cellular_component GO:0055085; transmembrane transport; biological_process GO:0006812; cation transport; biological_process GO:0016020; membrane; cellular_component GO:0015299; solute:hydrogen antiporter activity; molecular_function GO:0016747; transferase activity, transferring a…	{EF682061.1; Eranthis hyemalis 3-ketoacyl-CoA synthase mRNA, complete cds}	{PF08392:FAE1/Type III polyketide synthase-like protein PF08545:3-Oxoacyl-[acyl-carrier-protein (ACP)] synthase III PF00999:Sodium/hydrogen exchanger family}
transcript_HQ_HBZL_transcript10022/f2p0/2040	2040	382	16.56	30.4	1	0	11.04	0.45	0.88	0.03	0	{XP_010253732.1; PREDICTED: synaptotagmin-3 [Nelumbo nucifera]}	{sp|Q7XA06|SYT3_ARATH; Synaptotagmin-3 OS=Arabidopsis thaliana GN=SYT3 PE=2 SV=1}	{nnu:104594890; - - - - -}	{At5g04220; KOG1012 Ca2+-dependent lipid-binding protein CLB1/vesicle protein vp115/Granuphilin A, contains C2 domain R General function prediction only ;}	{GO:0005515; protein binding; molecular_function GO:0006260; DNA replication; biological_process GO:0008408; 3'-5' exonuclease activity; molecular_function GO:0008289; lipid binding; molecular_function}	{XM_010255430.1; PREDICTED: Nelumbo nucifera synaptotagmin-3 (LOC104594890), mRNA}	{PF07733:Bacterial DNA polymerase III alpha subunit PF17047:Synaptotagmin-like mitochondrial-lipid-binding domain PF00168:C2 domain}
transcript_HQ_HBZL_transcript10023/f4p0/2035	2035	298.02	0	2.04	24.22	28.32	8.64	0	0.06	0.79	0.85	{XP_010649799.1; PREDICTED: bifunctional 3-dehydroquinate dehydratase/shikimate dehydrogenase, chloroplastic isoform X2 [Vitis vinifera]}	{sp|Q9SQT8|DHQSD_ARATH; Bifunctional 3-dehydroquinate dehydratase/shikimate dehydrogenase, chloroplastic OS=Arabidopsis thaliana GN=EMB3004 PE=1 SV=1}	{mdm:103436745; K13832 aroDE, DHQ-SDH 3-dehydroquinate dehydratase / shikimate dehydrogenase [EC:4.2.1.10 1.1.1.25] 4.2.1.10,1.1.1.25 ko01230; Metabolism; Global and overview maps; Biosynthesis of amino acids | ko00400; Metabolism; Amino acid metabolism; Phenylalanine, tyrosine and tryptophan biosynthesis}	{At3g06350; KOG0692 Pentafunctional AROM protein E Amino acid transport and metabolism ;}	{GO:0008033; tRNA processing; biological_process GO:0003855; 3-dehydroquinate dehydratase activity; molecular_function GO:0016491; oxidoreductase activity; molecular_function GO:0055114; oxidation-reduction process; biological_process GO:0050660; flavin adenine dinucleotide binding; molecular_function GO:0051287; NAD binding; molecular_function GO:0004764; shikimate 5-dehydrogenase activity; mole…	{XM_010651497.2; PREDICTED: Vitis vinifera bifunctional 3-dehydroquinate dehydratase/shikimate dehydrogenase, chloroplastic (LOC100242676), transcript variant X2, mRNA}	{PF01487:Type I 3-dehydroquinase PF02826:D-isomer specific 2-hydroxyacid dehydrogenase, NAD binding domain PF08501:Shikimate dehydrogenase substrate binding domain PF07992:Pyridine nucleotide-disulphide oxidoreductase PF01134:Glucose inhibited division protein A PF03446:NAD binding domain of 6-phosphogluconate dehydrogenase PF03435:Saccharopine dehydrogenase NADP binding domain}
transcript_HQ_HBZL_transcript10025/f3p0/2044	2044	318	0	33.63	89.28	84.88	9.17	0	0.97	2.9	2.53	{XP_010269408.1; PREDICTED: uncharacterized protein LOC104606062 [Nelumbo nucifera]}	{sp|Q9FY51|HPAT3_ARATH; Hydroxyproline O-arabinosyltransferase 3 OS=Arabidopsis thaliana GN=HPAT3 PE=1 SV=1}	{vvi:100244671; K20782 HPAT hydroxyproline O-arabinosyltransferase 2.4.2.58 ko00514; Metabolism; Glycan biosynthesis and metabolism; Other types of O-glycan biosynthesis}	{NA}	{NA}	{XM_010271110.2; PREDICTED: Nelumbo nucifera uncharacterized LOC104606062 (LOC104606062), transcript variant X3, mRNA}	{NA}
transcript_HQ_HBZL_transcript10026/f2p0/2036	2036	260.63	0	0	0	0	7.55	0	0	0	0	{XP_008227980.1; PREDICTED: 7-dehydrocholesterol reductase [Prunus mume]}	{sp|Q9LDU6|ST7R_ARATH; 7-dehydrocholesterol reductase OS=Arabidopsis thaliana GN=DWF5 PE=1 SV=1}	{cit:102631279; K00213 DHCR7 7-dehydrocholesterol reductase 1.3.1.21 ko00100; Metabolism; Lipid metabolism; Steroid biosynthesis}	{At1g50430; KOG1435 Sterol reductase/lamin B receptor IT Lipid transport and metabolism ; Signal transduction mechanisms ;}	{GO:0016020; membrane; cellular_component}	{XM_008229758.2; PREDICTED: Prunus mume 7-dehydrocholesterol reductase (LOC103327428), mRNA}	{PF01222:Ergosterol biosynthesis ERG4/ERG24 family}
transcript_HQ_HBZL_transcript10031/f4p0/2055	2055	270.29	6.03	3.57	20.22	18.22	7.75	0.16	0.1	0.65	0.54	{XP_010247369.1; PREDICTED: serine/threonine-protein kinase 38-like [Nelumbo nucifera]}	{sp|Q54IH8|NDRB_DICDI; Probable serine/threonine-protein kinase ndrB OS=Dictyostelium discoideum GN=ndrB PE=3 SV=1}	{egu:105040391; K08790 STK38, NDR serine/threonine kinase 38 2.7.11.1 -}	{At4g33080; KOG0605 NDR and related serine/threonine kinases R General function prediction only ;}	{GO:0016020; membrane; cellular_component GO:0006468; protein phosphorylation; biological_process GO:0004672; protein kinase activity; molecular_function GO:0016773; phosphotransferase activity, alcohol group as acceptor; molecular_function GO:0004674; protein serine/threonine kinase activity; molecular_function GO:0005524; ATP binding; molecular_function}	{XM_010249067.2; PREDICTED: Nelumbo nucifera serine/threonine-protein kinase 38-like (LOC104590399), mRNA}	{PF06293:Lipopolysaccharide kinase (Kdo/WaaP) family PF00433:Protein kinase C terminal domain PF05445:Poxvirus serine/threonine protein kinase PF07714:Protein tyrosine kinase PF00069:Protein kinase domain}
transcript_HQ_HBZL_transcript10033/f2p0/2037	2036	434.18	8.03	1	0	1	12.58	0.22	0.03	0	0.03	{XP_002521658.1; PREDICTED: calcium-dependent protein kinase 28 [Ricinus communis]}	{sp|Q7XJR9|CDPKG_ARATH; Calcium-dependent protein kinase 16 OS=Arabidopsis thaliana GN=CPK16 PE=1 SV=1}	{aip:107623623; K13412 CPK calcium-dependent protein kinase 2.7.11.1 ko04626; Organismal Systems; Environmental adaptation; Plant-pathogen interaction | ko05145; Human Diseases; Infectious diseases: Parasitic; Toxoplasmosis}	{At2g17890; KOG0032 Ca2+/calmodulin-dependent protein kinase, EF-Hand protein superfamily T Signal transduction mechanisms ;}	{GO:0016021; integral to membrane; cellular_component GO:0016773; phosphotransferase activity, alcohol group as acceptor; molecular_function GO:0005524; ATP binding; molecular_function GO:0009401; phosphoenolpyruvate-dependent sugar phosphotransferase system; biological_process GO:0004190; aspartic-type endopeptidase activity; molecular_function GO:0016020; membrane; cellular_component GO:0008982…	{XM_010270385.2; PREDICTED: Nelumbo nucifera calcium-dependent protein kinase 18-like (LOC104605565), mRNA}	{PF03612:Sorbitol phosphotransferase enzyme II N-terminus PF06293:Lipopolysaccharide kinase (Kdo/WaaP) family PF01080:Presenilin PF00069:Protein kinase domain PF07714:Protein tyrosine kinase}
transcript_HQ_HBZL_transcript10035/f3p0/2035	2035	227.09	5	11	5	0	6.58	0.14	0.32	0.16	0	{AEB61486.1; beta-glucosidase [Consolida orientalis]}	{sp|B8AVF0|BGL12_ORYSI; Beta-glucosidase 12 OS=Oryza sativa subsp. indica GN=BGLU12 PE=3 SV=1}	{nnu:104597529; K01188 E3.2.1.21 beta-glucosidase 3.2.1.21 ko00500; Metabolism; Carbohydrate metabolism; Starch and sucrose metabolism | ko00460; Metabolism; Metabolism of other amino acids; Cyanoamino acid metabolism | ko00940; Metabolism; Biosynthesis of other secondary metabolites; Phenylpropanoid biosynthesis}	{At2g44480; KOG0626 Beta-glucosidase, lactase phlorizinhydrolase, and related proteins G Carbohydrate transport and metabolism ;}	{GO:0004553; hydrolase activity, hydrolyzing O-glycosyl compounds; molecular_function GO:0005975; carbohydrate metabolic process; biological_process}	{HM559226.1; Consolida orientalis beta-glucosidase (GLU2) mRNA, complete cds}	{PF00232:Glycosyl hydrolase family 1}
transcript_HQ_HBZL_transcript10038/f4p0/2051	2051	128.53	4	1.28	5.3	8.07	3.69	0.11	0.04	0.17	0.24	{OMP09831.1; hypothetical protein COLO4_05102 [Corchorus olitorius]}	{sp|P80461|GSHRP_TOBAC; Glutathione reductase, chloroplastic (Fragment) OS=Nicotiana tabacum GN=GOR PE=1 SV=1}	{nnu:104602393; K00383 GSR, gor glutathione reductase (NADPH) 1.8.1.7 ko00480; Metabolism; Metabolism of other amino acids; Glutathione metabolism | ko04918; Organismal Systems; Endocrine system; Thyroid hormone synthesis}	{At3g54660; KOG0405 Pyridine nucleotide-disulphide oxidoreductase Q Secondary metabolites biosynthesis, transport and catabolism ;}	{GO:0016491; oxidoreductase activity; molecular_function GO:0045454; cell redox homeostasis; biological_process GO:0055114; oxidation-reduction process; biological_process}	{XM_018122083.1; PREDICTED: Theobroma cacao glutathione reductase, chloroplastic (LOC18613230), mRNA}	{PF02852:Pyridine nucleotide-disulphide oxidoreductase, dimerisation domain PF00070:Pyridine nucleotide-disulphide oxidoreductase PF07992:Pyridine nucleotide-disulphide oxidoreductase}
transcript_HQ_HBZL_transcript10039/f2p0/2072	2071	226	3.61	29.16	0	0	6.42	0.1	0.83	0	0	{XP_002281223.1; PREDICTED: glucose-1-phosphate adenylyltransferase large subunit 1 isoform X1 [Vitis vinifera]}	{sp|P55233|GLGL1_BETVU; Glucose-1-phosphate adenylyltransferase large subunit, chloroplastic/amyloplastic OS=Beta vulgaris GN=AGPS1 PE=2 SV=1}	{nnu:104595644; K00975 glgC glucose-1-phosphate adenylyltransferase 2.7.7.27 ko00500; Metabolism; Carbohydrate metabolism; Starch and sucrose metabolism | ko00520; Metabolism; Carbohydrate metabolism; Amino sugar and nucleotide sugar metabolism | ko02026; Cellular Processes; Cellular community - prokaryotes; Biofilm formation - Escherichia coli}	{At1g27680; KOG1322 GDP-mannose pyrophosphorylase/mannose-1-phosphate guanylyltransferase M Cell wall/membrane/envelope biogenesis ;}	{GO:0009058; biosynthetic process; biological_process GO:0016779; nucleotidyltransferase activity; molecular_function}	{XM_010265304.2; PREDICTED: Nelumbo nucifera glucose-1-phosphate adenylyltransferase large subunit 1-like (LOC104601823), mRNA}	{PF00483:Nucleotidyl transferase}
transcript_HQ_HBZL_transcript1003/f3p0/3754	3754	529.15	0	0	1	0	7.84	0	0	0.02	0	{XP_010258910.1; PREDICTED: uncharacterized protein LOC104598504 [Nelumbo nucifera]}	{NA}	{nnu:104598504; - - - - -}	{NA}	{GO:0006450; regulation of translational fidelity; biological_process}	{NA}	{PF02686:Glu-tRNAGln amidotransferase C subunit}
transcript_HQ_HBZL_transcript10040/f3p0/2045	2045	236.74	0	7.31	44.44	52.12	6.82	0	0.21	1.44	1.55	{XP_010248537.1; PREDICTED: isocitrate dehydrogenase [NADP] isoform X1 [Nelumbo nucifera]}	{sp|Q8LPJ5|ICDHP_ARATH; Isocitrate dehydrogenase [NADP], chloroplastic/mitochondrial OS=Arabidopsis thaliana GN=At5g14590 PE=1 SV=1}	{nnu:104591424; K00031 IDH1, IDH2, icd isocitrate dehydrogenase 1.1.1.42 ko01200; Metabolism; Global and overview maps; Carbon metabolism | ko01210; Metabolism; Global and overview maps; 2-Oxocarboxylic acid metabolism | ko01230; Metabolism; Global and overview maps; Biosynthesis of amino acids | ko00020; Metabolism; Carbohydrate metabolism; Citrate cycle (TCA cycle) | ko00720; Metabolism; Energy…	{At5g14590; KOG1526 NADP-dependent isocitrate dehydrogenase C Energy production and conversion ;}	{GO:0016616; oxidoreductase activity, acting on the CH-OH group of donors, NAD or NADP as acceptor; molecular_function GO:0055114; oxidation-reduction process; biological_process}	{XM_006470222.2; PREDICTED: Citrus sinensis isocitrate dehydrogenase [NADP], chloroplastic/mitochondrial (LOC102629733), mRNA}	{PF00180:Isocitrate/isopropylmalate dehydrogenase}
transcript_HQ_HBZL_transcript10041/f3p0/2048	2048	183	53.6	18.85	0	0	5.27	1.46	0.54	0	0	{XP_010250190.1; PREDICTED: uncharacterized protein LOC104592493 [Nelumbo nucifera]}	{sp|Q8DKR7|DNAJ_THEEB; Chaperone protein DnaJ OS=Thermosynechococcus elongatus (strain BP-1) GN=dnaJ PE=3 SV=2}	{nnu:104592493; K03686 dnaJ molecular chaperone DnaJ - -}	{At1g80030; KOG0715 Molecular chaperone (DnaJ superfamily) O Posttranslational modification, protein turnover, chaperones ;}	{GO:0031072; heat shock protein binding; molecular_function GO:0051082; unfolded protein binding; molecular_function}	{XM_002265024.4; PREDICTED: Vitis vinifera chaperone protein DnaJ (LOC100268143), mRNA}	{PF00684:DnaJ central domain}
transcript_HQ_HBZL_transcript10042/f5p0/2034	2034	504.27	1.95	2.02	1	5.76	14.62	0.05	0.06	0.03	0.17	{XP_013624864.1; PREDICTED: uncharacterized protein LOC106331056 [Brassica oleracea var. oleracea]}	{sp|Q94C53|DDRGK_ARATH; DDRGK domain-containing protein 1 OS=Arabidopsis thaliana GN=At4g27120 PE=2 SV=1}	{cam:101488385; - - - - -}	{At1g32590; KOG0017 FOG: Transposon-encoded proteins with TYA, reverse transcriptase, integrase domains in various combinations R General function prediction only ;}	{NA}	{XM_010269441.2; PREDICTED: Nelumbo nucifera DDRGK domain-containing protein 1 (LOC104604871), mRNA}	{NA}
transcript_HQ_HBZL_transcript10043/f6p0/2033	2033	338.54	0	0	0	0	9.82	0	0	0	0	{OMO97700.1; hypothetical protein COLO4_14423 [Corchorus olitorius]}	{NA}	{pmum:103322479; - - - - -}	{At2g43340; KOG4197 FOG: PPR repeat R General function prediction only ;}	{NA}	{XR_789457.2; PREDICTED: Beta vulgaris subsp. vulgaris hypothetical protein (LOC104888508), transcript variant X3, misc_RNA}	{NA}
transcript_HQ_HBZL_transcript10047/f3p0/2056	2056	532	19	3	1	2	15.24	0.52	0.09	0.03	0.06	{XP_010247622.1; PREDICTED: cysteine-rich receptor-like protein kinase 10 [Nelumbo nucifera]}	{sp|Q8GYA4|CRK10_ARATH; Cysteine-rich receptor-like protein kinase 10 OS=Arabidopsis thaliana GN=CRK10 PE=1 SV=3}	{cit:102622618; - - - - -}	{NA}	{GO:0006468; protein phosphorylation; biological_process GO:0004222; metalloendopeptidase activity; molecular_function GO:0004672; protein kinase activity; molecular_function GO:0005524; ATP binding; molecular_function}	{XM_016047542.1; PREDICTED: Ziziphus jujuba G-type lectin S-receptor-like serine/threonine-protein kinase At4g27290 (LOC107435910), transcript variant X2, mRNA}	{PF07714:Protein tyrosine kinase PF00069:Protein kinase domain PF11857:Domain of unknown function (DUF3377)}
transcript_HQ_HBZL_transcript10048/f13p0/2065	2065	1175	0	8.86	7.92	9.59	33.49	0	0.25	0.25	0.28	{XP_007011947.1; PREDICTED: BTB/POZ domain-containing protein At2g24240 [Theobroma cacao]}	{sp|Q9ZUH1|Y2424_ARATH; BTB/POZ domain-containing protein At2g24240 OS=Arabidopsis thaliana GN=At2g24240 PE=2 SV=1}	{sot:102590283; - - - - -}	{At2g24240; KOG2714 SETA binding protein SB1 and related proteins, contain BTB/POZ domain R General function prediction only ;}	{GO:0051260; protein homooligomerization; biological_process}	{XM_004507674.2; PREDICTED: Cicer arietinum BTB/POZ domain-containing protein At2g24240 (LOC101513633), mRNA}	{PF02214:BTB/POZ domain}
transcript_HQ_HBZL_transcript10050/f2p0/2043	2043	748	8.16	18.81	4.02	0	21.58	0.22	0.54	0.13	0	{XP_010246118.1; PREDICTED: B3 domain-containing protein At2g36080-like [Nelumbo nucifera]}	{sp|Q9FNI3|Y5625_ARATH; B3 domain-containing protein At5g06250 OS=Arabidopsis thaliana GN=At5g06250 PE=2 SV=1}	{nnu:104589469; - - - - -}	{NA}	{GO:0003677; DNA binding; molecular_function}	{XM_019399100.1; PREDICTED: Nicotiana attenuata B3 domain-containing protein At2g36080-like (LOC109233284), mRNA}	{PF02362:B3 DNA binding domain}
transcript_HQ_HBZL_transcript10051/f4p0/2069	2069	964	0	0	17.02	2.01	27.42	0	0	0.55	0.06	{XP_010266820.1; PREDICTED: synaptotagmin-2-like [Nelumbo nucifera]}	{sp|Q9SKR2|SYT1_ARATH; Synaptotagmin-1 OS=Arabidopsis thaliana GN=SYT1 PE=1 SV=2}	{cmo:103488056; - - - - -}	{At1g20080; KOG1012 Ca2+-dependent lipid-binding protein CLB1/vesicle protein vp115/Granuphilin A, contains C2 domain R General function prediction only ;}	{GO:0008289; lipid binding; molecular_function GO:0005515; protein binding; molecular_function}	{XM_017373864.1; PREDICTED: Daucus carota subsp. sativus synaptotagmin-1-like (LOC108204435), mRNA}	{PF00168:C2 domain PF17047:Synaptotagmin-like mitochondrial-lipid-binding domain}
transcript_HQ_HBZL_transcript10053/f3p0/2027	2031	20.9	0	0	0	0	0.61	0	0	0	0	{XP_010253610.1; PREDICTED: MLO-like protein 6 [Nelumbo nucifera]}	{sp|Q94KB7|MLO6_ARATH; MLO-like protein 6 OS=Arabidopsis thaliana GN=MLO6 PE=2 SV=2}	{nnu:104594816; K08472 MLO mlo protein - -}	{NA}	{GO:0006817; phosphate transport; biological_process GO:0016020; membrane; cellular_component GO:0005315; inorganic phosphate transmembrane transporter activity; molecular_function GO:0016021; integral to membrane; cellular_component GO:0006952; defense response; biological_process GO:0007224; smoothened signaling pathway; biological_process}	{XM_004148737.2; PREDICTED: Cucumis sativus MLO-like protein 6 (LOC101217225), mRNA}	{PF01384:Phosphate transporter family PF03094:Mlo family PF12297:Ellis van Creveld protein 2 like protein}
transcript_HQ_HBZL_transcript10056/f4p0/2018	2018	317.53	0	0	1.58	0	9.29	0	0	0.05	0	{XP_010649604.1; PREDICTED: nhx1 antiporter isoform X1 [Vitis vinifera]}	{sp|Q68KI4|NHX1_ARATH; Sodium/hydrogen exchanger 1 OS=Arabidopsis thaliana GN=NHX1 PE=1 SV=2}	{nta:107774641; - - - - -}	{At5g27150; KOG1965 Sodium/hydrogen exchanger protein P Inorganic ion transport and metabolism ;}	{GO:0015299; solute:hydrogen antiporter activity; molecular_function GO:0006812; cation transport; biological_process GO:0055085; transmembrane transport; biological_process GO:0016021; integral to membrane; cellular_component}	{KU156825.1; Eschscholzia californica vacuoloar Na+/H+ antiporter 4 (NHX4) mRNA, complete cds}	{PF00999:Sodium/hydrogen exchanger family}
transcript_HQ_HBZL_transcript10058/f3p0/2033	2033	507.38	114.63	89.44	0	0	14.72	3.15	2.59	0	0	{XP_019051423.1; PREDICTED: uncharacterized protein LOC104586578 [Nelumbo nucifera]}	{sp|A7A261|LSB3_YEAS7; LAS seventeen-binding protein 3 OS=Saccharomyces cerevisiae (strain YJM789) GN=LSB3 PE=3 SV=2}	{cit:102622012; K20523 SH3YL1 SH3 domain-containing YSC84-like protein 1 - -}	{At1g29800; KOG1843 Uncharacterized conserved protein S Function unknown ;}	{GO:0046872; metal ion binding; molecular_function}	{XM_019195878.1; PREDICTED: Nelumbo nucifera uncharacterized LOC104586578 (LOC104586578), mRNA}	{PF01363:FYVE zinc finger}
transcript_HQ_HBZL_transcript1005/f4p0/3768	3768	321.94	0	0	0	0	4.75	0	0	0	0	{XP_018847682.1; PREDICTED: auxin response factor 6 isoform X3 [Juglans regia]}	{sp|Q2QM84|ARFY_ORYSJ; Auxin response factor 25 OS=Oryza sativa subsp. japonica GN=ARF25 PE=2 SV=1}	{fve:101306795; - - - - -}	{NA}	{GO:0003677; DNA binding; molecular_function GO:0005634; nucleus; cellular_component GO:0009725; response to hormone stimulus; biological_process GO:0006355; regulation of transcription, DNA-dependent; biological_process}	{XM_010277609.2; PREDICTED: Nelumbo nucifera auxin response factor 6-like (LOC104610814), transcript variant X2, mRNA}	{PF02362:B3 DNA binding domain PF06507:Auxin response factor}
transcript_HQ_HBZL_transcript10061/f4p0/2034	2034	436.92	0	0	0	0	12.67	0	0	0	0	{XP_008466316.1; PREDICTED: rust resistance kinase Lr10-like [Cucumis melo]}	{sp|P93604|LRK10_WHEAT; Rust resistance kinase Lr10 OS=Triticum aestivum GN=LRK10 PE=2 SV=1}	{csv:101219459; - - - - -}	{NA}	{GO:0004672; protein kinase activity; molecular_function GO:0006468; protein phosphorylation; biological_process GO:0005524; ATP binding; molecular_function}	{NA}	{PF00069:Protein kinase domain PF07714:Protein tyrosine kinase}
transcript_HQ_HBZL_transcript10062/f9p0/2008	2008	722.66	0	1.59	0	0	21.26	0	0.05	0	0	{XP_017258811.1; PREDICTED: T-complex protein 1 subunit theta [Daucus carota subsp. sativus]}	{sp|Q94K05|TCPQ_ARATH; T-complex protein 1 subunit theta OS=Arabidopsis thaliana GN=CCT8 PE=1 SV=1}	{nnu:104597701; K09500 CCT8 T-complex protein 1 subunit theta - -}	{At3g03960; KOG0362 Chaperonin complex component, TCP-1 theta subunit (CCT8) O Posttranslational modification, protein turnover, chaperones ;}	{GO:0005524; ATP binding; molecular_function}	{XM_010259406.2; PREDICTED: Nelumbo nucifera T-complex protein 1 subunit theta (LOC104597701), mRNA}	{PF00118:TCP-1/cpn60 chaperonin family}
transcript_HQ_HBZL_transcript10065/f3p0/1498	1498	0	0	0	4.49	3.5	0	0	0	0.21	0.15	{XP_010257275.1; PREDICTED: ATP-dependent 6-phosphofructokinase 5, chloroplastic-like [Nelumbo nucifera]}	{sp|Q8VYN6|PFKA5_ARATH; ATP-dependent 6-phosphofructokinase 5, chloroplastic OS=Arabidopsis thaliana GN=PFK5 PE=1 SV=1}	{nnu:104597444; K00850 pfkA, PFK 6-phosphofructokinase 1 2.7.1.11 ko01200; Metabolism; Global and overview maps; Carbon metabolism | ko01230; Metabolism; Global and overview maps; Biosynthesis of amino acids | ko00010; Metabolism; Carbohydrate metabolism; Glycolysis / Gluconeogenesis | ko00030; Metabolism; Carbohydrate metabolism; Pentose phosphate pathway | ko00051; Metabolism; Carbohydrate meta…	{At2g22480; KOG2440 Pyrophosphate-dependent phosphofructo-1-kinase G Carbohydrate transport and metabolism ;}	{GO:0006096; glycolysis; biological_process GO:0003872; 6-phosphofructokinase activity; molecular_function}	{XM_010258982.2; PREDICTED: Nelumbo nucifera ATP-dependent 6-phosphofructokinase 5, chloroplastic-like (LOC104597444), transcript variant X3, mRNA}	{PF00365:Phosphofructokinase}
transcript_HQ_HBZL_transcript10068/f3p0/2026	2025	90.14	0	0	0	0	2.63	0	0	0	0	{XP_015876041.1; PREDICTED: probable choline kinase 2 isoform X2 [Ziziphus jujuba]}	{sp|Q8L518|CK2_ARATH; Probable choline kinase 2 OS=Arabidopsis thaliana GN=At1g74320 PE=2 SV=1}	{vvi:100253952; K14156 CHK choline/ethanolamine kinase [EC:2.7.1.32 2.7.1.82] 2.7.1.32,2.7.1.82 ko00564; Metabolism; Lipid metabolism; Glycerophospholipid metabolism | ko05231; Human Diseases; Cancers: Overview; Choline metabolism in cancer}	{At1g74320; KOG2686 Choline kinase M Cell wall/membrane/envelope biogenesis ;}	{GO:0016773; phosphotransferase activity, alcohol group as acceptor; molecular_function}	{XM_018859594.1; PREDICTED: Eucalyptus grandis probable choline kinase 2 (LOC104454514), transcript variant X6, mRNA}	{PF04428:Choline kinase N terminus}
transcript_HQ_HBZL_transcript10069/f2p0/2047	2047	113.23	0	0	0	0	3.26	0	0	0	0	{XP_017631592.1; PREDICTED: putative glucose-6-phosphate 1-epimerase [Gossypium arboreum]}	{sp|Q40784|AAPC_CENCI; Putative glucose-6-phosphate 1-epimerase OS=Cenchrus ciliaris PE=2 SV=1}	{pda:103708356; K01792 E5.1.3.15 glucose-6-phosphate 1-epimerase 5.1.3.15 ko00010; Metabolism; Carbohydrate metabolism; Glycolysis / Gluconeogenesis}	{At3g61610; KOG1594 Uncharacterized enzymes related to aldose 1-epimerase G Carbohydrate transport and metabolism ;}	{GO:0005975; carbohydrate metabolic process; biological_process GO:0016853; isomerase activity; molecular_function}	{NA}	{PF01263:Aldose 1-epimerase}
transcript_HQ_HBZL_transcript1006/f2p0/3746	3746	60.48	0	0	0	0	0.9	0	0	0	0	{XP_020114325.1; zinc finger protein VAR3, chloroplastic, partial [Ananas comosus]}	{sp|Q8S9K3|VAR3_ARATH; Zinc finger protein VAR3, chloroplastic OS=Arabidopsis thaliana GN=VAR3 PE=1 SV=2}	{egu:105046081; - - - - -}	{At5g17790; KOG4198 RNA-binding Ran Zn-finger protein and related proteins R General function prediction only ;}	{GO:0005840; ribosome; cellular_component GO:0005515; protein binding; molecular_function GO:0006412; translation; biological_process GO:0003735; structural constituent of ribosome; molecular_function GO:0005506; iron ion binding; molecular_function GO:0005622; intracellular; cellular_component GO:0008270; zinc ion binding; molecular_function}	{XM_010924578.2; PREDICTED: Elaeis guineensis zinc finger protein VAR3, chloroplastic (LOC105046081), mRNA}	{PF00301:Rubredoxin PF00641:Zn-finger in Ran binding protein and others PF01780:Ribosomal L37ae protein family PF02891:MIZ/SP-RING zinc finger PF00628:PHD-finger}
transcript_HQ_HBZL_transcript10070/f2p0/2062	2063	102.79	0	0	0	0	2.93	0	0	0	0	{XP_010274721.1; PREDICTED: uncharacterized protein LOC104609967 [Nelumbo nucifera]}	{NA}	{cit:102611927; - - - - -}	{NA}	{GO:0016020; membrane; cellular_component GO:0016021; integral to membrane; cellular_component}	{XM_018969163.1; PREDICTED: Juglans regia uncharacterized LOC108994075 (LOC108994075), mRNA}	{PF00892:EamA-like transporter family}
transcript_HQ_HBZL_transcript10071/f27p0/2037	2037	3105	0	0.61	0	0	89.89	0	0.02	0	0	{XP_010262454.1; PREDICTED: uncharacterized protein LOC104600975 [Nelumbo nucifera]}	{NA}	{pper:PRUPE_ppa003532mg; - - - - -}	{NA}	{NA}	{XM_016795052.1; PREDICTED: Prunus mume uncharacterized LOC103334410 (LOC103334410), transcript variant X2, mRNA}	{NA}
transcript_HQ_HBZL_transcript10072/f3p0/2028	2028	798	158.59	67.36	36.92	36.26	23.22	4.37	1.96	1.21	1.09	{XP_010271641.1; PREDICTED: signal recognition particle 54 kDa protein, chloroplastic-like [Nelumbo nucifera]}	{sp|P37107|SR54C_ARATH; Signal recognition particle 54 kDa protein, chloroplastic OS=Arabidopsis thaliana GN=FFC PE=1 SV=1}	{nnu:104588864; K03106 SRP54, ffh signal recognition particle subunit SRP54 3.6.5.4 ko03060; Genetic Information Processing; Folding, sorting and degradation; Protein export | ko03070; Environmental Information Processing; Membrane transport; Bacterial secretion system | ko02024; Cellular Processes; Cellular community - prokaryotes; Quorum sensing}	{At5g03940; KOG0780 Signal recognition particle, subunit Srp54 U Intracellular trafficking, secretion, and vesicular transport ;}	{GO:0005525; GTP binding; molecular_function GO:0016787; hydrolase activity; molecular_function GO:0008312; 7S RNA binding; molecular_function GO:0003873; 6-phosphofructo-2-kinase activity; molecular_function GO:0000723; telomere maintenance; biological_process GO:0003677; DNA binding; molecular_function GO:0005524; ATP binding; molecular_function GO:0016301; kinase activity; molecular_function G…	{XM_010273339.2; PREDICTED: Nelumbo nucifera signal recognition particle 54 kDa protein, chloroplastic-like (LOC104607660), mRNA}	{PF06414:Zeta toxin PF00448:SRP54-type protein, GTPase domain PF02881:SRP54-type protein, helical bundle domain PF05970:PIF1-like helicase PF00004:ATPase family associated with various cellular activities (AAA) PF03266:NTPase PF01591:6-phosphofructo-2-kinase PF04851:Type III restriction enzyme, res subunit PF01926:50S ribosome-binding GTPase PF02978:Signal peptide binding domain}
transcript_HQ_HBZL_transcript10074/f2p0/2036	2036	68.73	0	2	2	0	1.99	0	0.06	0.07	0	{XP_010257033.1; PREDICTED: shewanella-like protein phosphatase 1 [Nelumbo nucifera]}	{sp|Q8L774|SLP1_ARATH; Shewanella-like protein phosphatase 1 OS=Arabidopsis thaliana GN=SLP1 PE=1 SV=1}	{nnu:104597270; - - - - -}	{At1g07010; KOG0374 Serine/threonine specific protein phosphatase PP1, catalytic subunit TR Signal transduction mechanisms ; General function prediction only ;}	{NA}	{XM_010258731.2; PREDICTED: Nelumbo nucifera shewanella-like protein phosphatase 1 (LOC104597270), mRNA}	{NA}
transcript_HQ_HBZL_transcript10077/f6p0/2036	2036	293.96	17.14	17.61	6	3.01	8.51	0.47	0.51	0.2	0.09	{XP_017700060.1; PREDICTED: shewanella-like protein phosphatase 1 [Phoenix dactylifera]}	{sp|Q8L774|SLP1_ARATH; Shewanella-like protein phosphatase 1 OS=Arabidopsis thaliana GN=SLP1 PE=1 SV=1}	{egu:105045899; - - - - -}	{At1g07010; KOG0374 Serine/threonine specific protein phosphatase PP1, catalytic subunit TR Signal transduction mechanisms ; General function prediction only ;}	{GO:0016787; hydrolase activity; molecular_function}	{XM_002277745.3; PREDICTED: Vitis vinifera shewanella-like protein phosphatase 1 (LOC100262041), mRNA}	{PF00149:Calcineurin-like phosphoesterase}
transcript_HQ_HBZL_transcript10078/f3p0/2049	2049	674.73	22.72	15.61	4.71	7.1	19.4	0.62	0.45	0.15	0.21	{XP_010261434.1; PREDICTED: calcium-dependent protein kinase 1-like [Nelumbo nucifera]}	{sp|A2ZVI7|CDPK1_ORYSJ; Calcium-dependent protein kinase 1 OS=Oryza sativa subsp. japonica GN=CPK1 PE=2 SV=1}	{pop:POPTR_0001s10070g; K13412 CPK calcium-dependent protein kinase 2.7.11.1 ko04626; Organismal Systems; Environmental adaptation; Plant-pathogen interaction | ko05145; Human Diseases; Infectious diseases: Parasitic; Toxoplasmosis}	{At4g23650; KOG0032 Ca2+/calmodulin-dependent protein kinase, EF-Hand protein superfamily T Signal transduction mechanisms ;}	{GO:0016773; phosphotransferase activity, alcohol group as acceptor; molecular_function GO:0005524; ATP binding; molecular_function GO:0016020; membrane; cellular_component GO:0005509; calcium ion binding; molecular_function GO:0005515; protein binding; molecular_function GO:0004672; protein kinase activity; molecular_function GO:0007165; signal transduction; biological_process GO:0006468; protei…	{XM_010253281.2; PREDICTED: Nelumbo nucifera calcium-dependent protein kinase 1-like (LOC104593445), mRNA}	{PF00069:Protein kinase domain PF07714:Protein tyrosine kinase PF06293:Lipopolysaccharide kinase (Kdo/WaaP) family PF13833:EF-hand domain pair PF13499:EF-hand domain pair PF00036:EF hand PF10591:Secreted protein acidic and rich in cysteine Ca binding region PF12763:Cytoskeletal-regulatory complex EF hand PF13405:EF-hand domain PF13202:EF hand}
transcript_HQ_HBZL_transcript10080/f4p0/2032	2031	313.28	0	3.76	13.55	24.95	9.1	0	0.11	0.44	0.75	{XP_010256741.1; PREDICTED: probable serine/threonine-protein kinase At5g41260 [Nelumbo nucifera]}	{sp|B9FDE0|BSK3_ORYSJ; Probable serine/threonine-protein kinase BSK3 OS=Oryza sativa subsp. japonica GN=BSK3 PE=1 SV=1}	{nnu:104597050; K14500 BSK BR-signaling kinase 2.7.11.1 ko04075; Environmental Information Processing; Signal transduction; Plant hormone signal transduction}	{NA}	{GO:0046782; regulation of viral transcription; biological_process GO:0005524; ATP binding; molecular_function GO:0006468; protein phosphorylation; biological_process GO:0004672; protein kinase activity; molecular_function}	{XM_010258439.2; PREDICTED: Nelumbo nucifera probable serine/threonine-protein kinase At5g41260 (LOC104597050), mRNA}	{PF05112:Baculovirus P47 protein PF07714:Protein tyrosine kinase PF00069:Protein kinase domain}
transcript_HQ_HBZL_transcript10083/f2p0/2031	2032	20.61	0	12	0	0	0.6	0	0.35	0	0	{XP_010265161.1; PREDICTED: protein NRT1/ PTR FAMILY 3.1 [Nelumbo nucifera]}	{sp|Q9SX20|PTR18_ARATH; Protein NRT1/ PTR FAMILY 3.1 OS=Arabidopsis thaliana GN=NPF3.1 PE=2 SV=1}	{cic:CICLE_v10031055mg; - - - - -}	{At1g68570; KOG1237 H+/oligopeptide symporter E Amino acid transport and metabolism ;}	{GO:0016020; membrane; cellular_component GO:0005215; NA GO:0006810; transport; biological_process GO:0016021; integral to membrane; cellular_component GO:0055085; transmembrane transport; biological_process}	{XM_009612650.2; PREDICTED: Nicotiana tomentosiformis protein NRT1/ PTR FAMILY 3.1 (LOC104104541), mRNA}	{PF00854:POT family PF07690:Major Facilitator Superfamily}
transcript_HQ_HBZL_transcript10084/f2p0/2026	2026	0	0	0	0	0	0	0	0	0	0	{XP_010245116.1; PREDICTED: protein NRT1/ PTR FAMILY 5.10-like isoform X2 [Nelumbo nucifera]}	{sp|Q0WP01|PTR9_ARATH; Protein NRT1/ PTR FAMILY 5.10 OS=Arabidopsis thaliana GN=NPF5.10 PE=2 SV=1}	{pper:PRUPE_ppa003472mg; K14638 SLC15A3_4, PHT solute carrier family 15 (peptide/histidine transporter), member 3/4 - -}	{At1g22540; KOG1237 H+/oligopeptide symporter E Amino acid transport and metabolism ;}	{GO:0006810; transport; biological_process GO:0005215; NA GO:0016020; membrane; cellular_component}	{XM_006356442.2; PREDICTED: Solanum tuberosum protein NRT1/ PTR FAMILY 5.10-like (LOC102597245), mRNA}	{PF00854:POT family}
transcript_HQ_HBZL_transcript10087/f2p0/1914	1914	164.87	132.11	46.9	21.35	23.49	5.12	3.88	1.46	0.75	0.75	{XP_010269337.1; PREDICTED: pyruvate kinase 2, cytosolic-like [Nelumbo nucifera]}	{sp|Q2RAK2|KPYC1_ORYSJ; Pyruvate kinase 1, cytosolic OS=Oryza sativa subsp. japonica GN=Os11g0148500 PE=1 SV=1}	{atr:18448349; K00873 PK, pyk pyruvate kinase 2.7.1.40 ko01200; Metabolism; Global and overview maps; Carbon metabolism | ko01230; Metabolism; Global and overview maps; Biosynthesis of amino acids | ko00010; Metabolism; Carbohydrate metabolism; Glycolysis / Gluconeogenesis | ko00620; Metabolism; Carbohydrate metabolism; Pyruvate metabolism | ko00230; Metabolism; Nucleotide metabolism; Purine meta…	{At3g52990; KOG2323 Pyruvate kinase G Carbohydrate transport and metabolism ;}	{GO:0030955; potassium ion binding; molecular_function GO:0000287; magnesium ion binding; molecular_function GO:0004743; pyruvate kinase activity; molecular_function GO:0003824; NA GO:0006096; glycolysis; biological_process}	{XM_010271035.1; PREDICTED: Nelumbo nucifera pyruvate kinase 2, cytosolic-like (LOC104606028), mRNA}	{PF03328:HpcH/HpaI aldolase/citrate lyase family PF00224:Pyruvate kinase, barrel domain}
transcript_HQ_HBZL_transcript10088/f2p0/2035	2035	885.98	112.68	39.25	0	0	25.68	3.09	1.14	0	0	{XP_010247903.1; PREDICTED: protein WVD2-like 4 isoform X1 [Nelumbo nucifera]}	{sp|Q9SJ62|WDL4_ARATH; Protein WVD2-like 4 OS=Arabidopsis thaliana GN=WDL4 PE=1 SV=2}	{nnu:104590846; - - - - -}	{NA}	{NA}	{XM_011032247.1; PREDICTED: Populus euphratica uncharacterized LOC105129966 (LOC105129966), transcript variant X4, mRNA}	{NA}
transcript_HQ_HBZL_transcript10089/f2p0/2033	2033	231.89	0	0	0	0	6.73	0	0	0	0	{XP_010242343.1; PREDICTED: protein NRT1/ PTR FAMILY 4.6 [Nelumbo nucifera]}	{sp|Q8H157|PTR19_ARATH; Protein NRT1/ PTR FAMILY 4.6 OS=Arabidopsis thaliana GN=NPF4.6 PE=1 SV=1}	{nnu:104596713; - - - - -}	{At1g69850; KOG1237 H+/oligopeptide symporter E Amino acid transport and metabolism ;}	{GO:0016020; membrane; cellular_component GO:0005215; NA GO:0006810; transport; biological_process}	{XM_011072731.1; PREDICTED: Sesamum indicum protein NRT1/ PTR FAMILY 4.6-like (LOC105156563), mRNA}	{PF00854:POT family}
transcript_HQ_HBZL_transcript1008/f6p0/3680	3680	1058.23	110.51	49.96	0	0	16.02	1.58	0.76	0	0	{XP_010245822.1; PREDICTED: zinc finger CCCH domain-containing protein 55 [Nelumbo nucifera]}	{sp|Q9LIH5|C3H38_ARATH; Zinc finger CCCH domain-containing protein 38 OS=Arabidopsis thaliana GN=At3g18640 PE=2 SV=1}	{lang:109341143; - - - - -; lang:109341143; - - - - -}	{NA}	{GO:0046872; metal ion binding; molecular_function}	{XM_018823647.1; PREDICTED: Musa acuminata subsp. malaccensis zinc finger CCCH domain-containing protein 55 (LOC103979041), transcript variant X6, mRNA}	{PF00642:Zinc finger C-x8-C-x5-C-x3-H type (and similar)}
transcript_HQ_HBZL_transcript10092/f10p0/2041	2041	978.06	3.4	0	0	0	28.25	0.09	0	0	0	{XP_010254671.1; PREDICTED: probable sphingolipid transporter spinster homolog 2 [Nelumbo nucifera]}	{sp|Q9FLG8|SPNS2_ARATH; Probable sphingolipid transporter spinster homolog 2 OS=Arabidopsis thaliana GN=At5g64500 PE=2 SV=1}	{nnu:104595586; - - - - -}	{At5g64500; KOG1330 Sugar transporter/spinster transmembrane protein G Carbohydrate transport and metabolism ;}	{GO:0022857; transmembrane transporter activity; molecular_function GO:0005215; NA GO:0016020; membrane; cellular_component GO:0055085; transmembrane transport; biological_process GO:0016021; integral to membrane; cellular_component GO:0006810; transport; biological_process}	{XM_018957640.1; PREDICTED: Juglans regia probable sphingolipid transporter spinster homolog 2 (LOC108985362), transcript variant X1, mRNA}	{PF03137:Organic Anion Transporter Polypeptide (OATP) family PF07690:Major Facilitator Superfamily PF00083:Sugar (and other) transporter}
transcript_HQ_HBZL_transcript10093/f3p0/2036	2036	294.14	4.52	0	2	0	8.52	0.12	0	0.07	0	{XP_008791400.1; PREDICTED: ubiquitin-like modifier-activating enzyme atg7 [Phoenix dactylifera]}	{sp|Q94CD5|ATG7_ARATH; Ubiquitin-like modifier-activating enzyme atg7 OS=Arabidopsis thaliana GN=ATG7 PE=1 SV=1}	{pda:103708313; K08337 ATG7 ubiquitin-like modifier-activating enzyme ATG7 - ko04140; Cellular Processes; Transport and catabolism; Autophagy - animal | ko04138; Cellular Processes; Transport and catabolism; Autophagy - yeast}	{At5g45900; KOG2337 Ubiquitin activating E1 enzyme-like protein H Coenzyme transport and metabolism ;}	{NA}	{NA}	{NA}
transcript_HQ_HBZL_transcript10097/f4p0/2091	2091	1394	0	0	0	0	39.18	0	0	0	0	{XP_010245067.2; PREDICTED: eukaryotic translation initiation factor 5 [Nelumbo nucifera]}	{sp|P48724|IF5_PHAVU; Eukaryotic translation initiation factor 5 OS=Phaseolus vulgaris GN=EIF5 PE=2 SV=1}	{sly:101262469; K03262 EIF5 translation initiation factor 5 - ko03013; Genetic Information Processing; Translation; RNA transport | ko04214; Cellular Processes; Cell growth and death; Apoptosis - fly}	{At1g36730; KOG2767 Translation initiation factor 5 (eIF-5) J Translation, ribosomal structure and biogenesis ;}	{GO:0003743; translation initiation factor activity; molecular_function GO:0005515; protein binding; molecular_function GO:0006413; translational initiation; biological_process}	{XM_002270666.4; PREDICTED: Vitis vinifera eukaryotic translation initiation factor 5-like (LOC100263898), mRNA}	{PF01873:Domain found in IF2B/IF5 PF02020:eIF4-gamma/eIF5/eIF2-epsilon}
transcript_HQ_HBZL_transcript10102/f2p0/2038	2038	160.77	0	0	0	0	4.65	0	0	0	0	{AHW52170.1; ATP synthase CF0 subunit I (chloroplast) [Rhazya stricta]}	{sp|Q09G59|ATPH_PLAOC; ATP synthase subunit c, chloroplastic OS=Platanus occidentalis GN=atpH PE=3 SV=1}	{ota:OstapCp45; K02110 ATPF0C, atpE F-type H+-transporting ATPase subunit c - ko00190; Metabolism; Energy metabolism; Oxidative phosphorylation | ko00195; Metabolism; Energy metabolism; Photosynthesis}	{AtCh010; KOG0232 Vacuolar H+-ATPase V0 sector, subunits c/c' C Energy production and conversion ;}	{GO:0015078; hydrogen ion transmembrane transporter activity; molecular_function GO:0033177; proton-transporting two-sector ATPase complex, proton-transporting domain; cellular_component GO:0015991; ATP hydrolysis coupled proton transport; biological_process}	{KM206568.1; Thalictrum coreanum plastid, complete genome}	{PF00137:ATP synthase subunit C}
transcript_HQ_HBZL_transcript10104/f2p0/2043	2042	170	0	0	0	0	4.91	0	0	0	0	{XP_010257021.1; PREDICTED: laccase-12-like [Nelumbo nucifera]}	{sp|Q9SIY8|LAC5_ARATH; Laccase-5 OS=Arabidopsis thaliana GN=LAC5 PE=2 SV=1}	{nnu:104597263; K05909 E1.10.3.2 laccase 1.10.3.2 -}	{At2g40370; KOG1263 Multicopper oxidases Q Secondary metabolites biosynthesis, transport and catabolism ;}	{GO:0055114; oxidation-reduction process; biological_process GO:0016491; oxidoreductase activity; molecular_function GO:0005507; copper ion binding; molecular_function}	{XM_010258719.2; PREDICTED: Nelumbo nucifera laccase-12-like (LOC104597263), mRNA}	{PF07732:Multicopper oxidase PF07731:Multicopper oxidase PF00394:Multicopper oxidase}
transcript_HQ_HBZL_transcript10105/f2p0/2029	2029	9976	0	4.01	0	0	290.08	0	0.12	0	0	{XP_010268803.1; PREDICTED: O-acyltransferase WSD1-like [Nelumbo nucifera]}	{NA}	{nnu:104605653; - - - - -}	{NA}	{GO:0004144; diacylglycerol O-acyltransferase activity; molecular_function GO:0045017; glycerolipid biosynthetic process; biological_process}	{NA}	{PF03007:Wax ester synthase-like Acyl-CoA acyltransferase domain PF06974:Protein of unknown function (DUF1298)}
transcript_HQ_HBZL_transcript10107/f8p0/2014	2014	2552.2	0	0	0	0	74.84	0	0	0	0	{XP_010545126.1; PREDICTED: B2 protein [Tarenaya hassleriana]}	{sp|P37707|B2_DAUCA; B2 protein OS=Daucus carota PE=2 SV=1}	{thj:104817575; - - - - -}	{NA}	{NA}	{XM_007040509.2; PREDICTED: Theobroma cacao B2 protein (LOC18606734), mRNA}	{NA}
transcript_HQ_HBZL_transcript10108/f3p0/2020	2020	51	0	0	0	0	1.49	0	0	0	0	{XP_010242266.1; PREDICTED: probable phospholipid-transporting ATPase 4 [Nelumbo nucifera]}	{sp|Q9LVK9|ALA7_ARATH; Probable phospholipid-transporting ATPase 7 OS=Arabidopsis thaliana GN=ALA7 PE=3 SV=3}	{pda:103702024; K01530 E3.6.3.1 phospholipid-translocating ATPase 3.6.3.1 -}	{At3g13900; KOG0206 P-type ATPase R General function prediction only ;}	{NA}	{XM_010927157.2; PREDICTED: Elaeis guineensis probable phospholipid-transporting ATPase 4 (LOC105047988), transcript variant X4, mRNA}	{NA}
transcript_HQ_HBZL_transcript10109/f2p0/2026	2027	136.47	0	0	0	0	3.97	0	0	0	0	{XP_010243240.1; PREDICTED: probable glucuronoxylan glucuronosyltransferase IRX7 [Nelumbo nucifera]}	{sp|Q9ZUV3|IRX7_ARATH; Probable glucuronoxylan glucuronosyltransferase IRX7 OS=Arabidopsis thaliana GN=IRX7 PE=2 SV=1}	{pvu:PHAVU_011G085300g; K20889 IRX7, FRA8, F8H probable glucuronoxylan glucuronosyltransferase IRX7 [EC2.4.1.-] - -}	{At2g28110; KOG1021 Acetylglucosaminyltransferase EXT1/exostosin 1 GMW Carbohydrate transport and metabolism ; Cell wall/membrane/envelope biogenesis ; Extracellular structures ;}	{NA}	{XM_013609382.1; Medicago truncatula glucuronoxylan glucuronosyltransferase, putative mRNA}	{NA}
transcript_HQ_HBZL_transcript10115/f2p0/2070	2071	1709.94	0	0	0	0	48.58	0	0	0	0	{XP_011070523.1; PREDICTED: annexin D5 [Sesamum indicum]}	{sp|Q9C9X3|ANXD5_ARATH; Annexin D5 OS=Arabidopsis thaliana GN=ANN5 PE=2 SV=2}	{sind:105156164; - - - - -}	{At1g68090; KOG0819 Annexin U Intracellular trafficking, secretion, and vesicular transport ;}	{GO:0005509; calcium ion binding; molecular_function GO:0005544; calcium-dependent phospholipid binding; molecular_function}	{BT145329.1; Lotus japonicus clone JCVI-FLLj-16K9 unknown mRNA}	{PF00191:Annexin}
transcript_HQ_HBZL_transcript10119/f4p0/2042	2042	520.89	0	6.06	1	0	15.04	0	0.17	0.03	0	{KDO78462.1; hypothetical protein CISIN_1g035612mg [Citrus sinensis]}	{sp|Q8LG88|TDT_ARATH; Tonoplast dicarboxylate transporter OS=Arabidopsis thaliana GN=TDT PE=2 SV=2}	{nnu:104594186; K14445 SLC13A2_3_5 solute carrier family 13 (sodium-dependent dicarboxylate transporter), member 2/3/5 - -}	{At5g47560; KOG1281 Na+/dicarboxylate, Na+/tricarboxylate and phosphate transporters P Inorganic ion transport and metabolism ;}	{GO:0016021; integral to membrane; cellular_component GO:0055085; transmembrane transport; biological_process GO:0005739; mitochondrion; cellular_component GO:0005215; NA GO:0016020; membrane; cellular_component GO:0006814; sodium ion transport; biological_process GO:0022900; electron transport chain; biological_process GO:0005747; mitochondrial respiratory chain complex I; cellular_component}	{XM_006449813.1; Citrus clementina hypothetical protein (CICLE_v10014770mg) mRNA, complete cds}	{PF03600:Citrate transporter PF00939:Sodium:sulfate symporter transmembrane region PF08122:NADH-ubiquinone oxidoreductase B12 subunit family}
transcript_HQ_HBZL_transcript10121/f3p0/2058	2060	189	18	26	2	15	5.4	0.49	0.74	0.06	0.44	{OMO61913.1; hypothetical protein CCACVL1_23153 [Corchorus capsularis]}	{sp|Q6AWW5|Y5262_ARATH; Ankyrin repeat-containing protein At5g02620 OS=Arabidopsis thaliana GN=At5g02620 PE=1 SV=1}	{nnu:104592108; - - - - -}	{At1g10340; KOG0504 FOG: Ankyrin repeat R General function prediction only ;}	{GO:0005515; protein binding; molecular_function}	{XM_016039099.1; PREDICTED: Ziziphus jujuba ankyrin repeat-containing protein At5g02620-like (LOC107428548), mRNA}	{PF13606:Ankyrin repeat PF00023:Ankyrin repeat}
transcript_HQ_HBZL_transcript10124/f3p0/2055	2053	1353.4	0	0	0	0	38.83	0	0	0	0	{XP_010249158.1; PREDICTED: protein AUXIN SIGNALING F-BOX 2-like [Nelumbo nucifera]}	{sp|Q9LW29|AFB2_ARATH; Protein AUXIN SIGNALING F-BOX 2 OS=Arabidopsis thaliana GN=AFB2 PE=1 SV=1}	{nnu:104591815; - - - - -}	{At3g26810; KOG1947 Leucine rich repeat proteins, some proteins contain F-box R General function prediction only ;}	{GO:0005515; protein binding; molecular_function}	{AC253884.1; Aquilegia coerulea clone COL06-M05, complete sequence}	{PF12937:F-box-like PF00646:F-box domain PF13516:Leucine Rich repeat}
transcript_HQ_HBZL_transcript10127/f3p0/2022	2022	244.06	0	20	0	56.79	7.12	0	0.58	0	1.71	{XP_004297035.1; PREDICTED: basic proline-rich protein [Fragaria vesca subsp. vesca]}	{sp|O82170|IKU1_ARATH; Protein HAIKU1 OS=Arabidopsis thaliana GN=IKU1 PE=1 SV=1}	{pxb:103943746; - - - - -}	{NA}	{NA}	{NA}	{NA}
transcript_HQ_HBZL_transcript10128/f2p0/2041	2041	71.09	0	0	5.3	10.66	2.05	0	0	0.17	0.32	{XP_004310101.1; PREDICTED: sphingosine-1-phosphate lyase [Fragaria vesca subsp. vesca]}	{sp|Q9C509|SGPL_ARATH; Sphingosine-1-phosphate lyase OS=Arabidopsis thaliana GN=DPL1 PE=1 SV=1}	{pop:POPTR_0003s16720g; K01634 SGPL1, DPL1 sphinganine-1-phosphate aldolase 4.1.2.27 ko00600; Metabolism; Lipid metabolism; Sphingolipid metabolism | ko04071; Environmental Information Processing; Signal transduction; Sphingolipid signaling pathway}	{At1g27980; KOG1383 Glutamate decarboxylase/sphingosine phosphate lyase E Amino acid transport and metabolism ;}	{GO:0016831; carboxy-lyase activity; molecular_function GO:0019752; carboxylic acid metabolic process; biological_process GO:0030170; pyridoxal phosphate binding; molecular_function GO:0009058; biosynthetic process; biological_process}	{XM_010250775.2; PREDICTED: Nelumbo nucifera sphingosine-1-phosphate lyase (LOC104591765), mRNA}	{PF00282:Pyridoxal-dependent decarboxylase conserved domain PF00155:Aminotransferase class I and II}
transcript_HQ_HBZL_transcript10129/f6p0/2074	2075	1029.15	0	0	0	0	29.18	0	0	0	0	{XP_010242939.1; PREDICTED: nuclear/nucleolar GTPase 2 [Nelumbo nucifera]}	{sp|Q9C923|NUG2_ARATH; Nuclear/nucleolar GTPase 2 OS=Arabidopsis thaliana GN=NUG2 PE=1 SV=1}	{jcu:105629173; K14537 NUG2, GNL2 nuclear GTP-binding protein - ko03008; Genetic Information Processing; Translation; Ribosome biogenesis in eukaryotes}	{At1g52980; KOG2423 Nucleolar GTPase R General function prediction only ;}	{GO:0003924; GTPase activity; molecular_function GO:0005525; GTP binding; molecular_function}	{XM_010547511.2; PREDICTED: Tarenaya hassleriana nuclear/nucleolar GTPase 2 (LOC104818066), transcript variant X1, mRNA}	{PF02421:Ferrous iron transport protein B PF03193:Protein of unknown function, DUF258 PF01926:50S ribosome-binding GTPase PF00025:ADP-ribosylation factor family}
transcript_HQ_HBZL_transcript1012/f8p0/3771	3771	2377.19	0	0	0	0	35.05	0	0	0	0	{XP_010257066.2; PREDICTED: ubiquitin-activating enzyme E1 1 [Nelumbo nucifera]}	{sp|P20973|UBE11_WHEAT; Ubiquitin-activating enzyme E1 1 OS=Triticum aestivum GN=UBA1 PE=1 SV=1}	{nnu:104597299; K03178 UBE1, UBA1 ubiquitin-activating enzyme E1 6.2.1.45 ko04120; Genetic Information Processing; Folding, sorting and degradation; Ubiquitin mediated proteolysis | ko05012; Human Diseases; Neurodegenerative diseases; Parkinson's disease}	{At2g30110; KOG2012 Ubiquitin activating enzyme UBA1 O Posttranslational modification, protein turnover, chaperones ;}	{GO:0008641; small protein activating enzyme activity; molecular_function}	{XM_010258764.2; PREDICTED: Nelumbo nucifera ubiquitin-activating enzyme E1 1 (LOC104597299), mRNA}	{PF00899:ThiF family}
transcript_HQ_HBZL_transcript10130/f2p0/2035	2035	114.87	0	0	0	0	3.33	0	0	0	0	{XP_019052485.1; PREDICTED: probable magnesium transporter NIPA8 isoform X3 [Nelumbo nucifera]}	{sp|Q8RWF4|NIPA8_ARATH; Probable magnesium transporter NIPA8 OS=Arabidopsis thaliana GN=At3g26670 PE=2 SV=1}	{nnu:104591909; - - - - -}	{At3g26670; KOG2922 Uncharacterized conserved protein S Function unknown ;}	{GO:0016021; integral to membrane; cellular_component GO:0015693; magnesium ion transport; biological_process GO:0015095; magnesium ion transmembrane transporter activity; molecular_function}	{XM_019196940.1; PREDICTED: Nelumbo nucifera probable magnesium transporter NIPA8 (LOC104592696), transcript variant X3, mRNA}	{PF05653:Magnesium transporter NIPA}
transcript_HQ_HBZL_transcript10131/f3p0/1986	1986	704	0	0	0	0	20.97	0	0	0	0	{XP_010263628.1; PREDICTED: aureusidin synthase-like [Nelumbo nucifera]}	{sp|Q9FRX6|AS1_ANTMA; Aureusidin synthase OS=Antirrhinum majus GN=AS1 PE=1 SV=1}	{nnu:104595657; K00422 E1.10.3.1 polyphenol oxidase 1.10.3.1 ko00350; Metabolism; Amino acid metabolism; Tyrosine metabolism | ko00950; Metabolism; Biosynthesis of other secondary metabolites; Isoquinoline alkaloid biosynthesis}	{NA}	{GO:0055114; oxidation-reduction process; biological_process GO:0004097; catechol oxidase activity; molecular_function GO:0016491; oxidoreductase activity; molecular_function GO:0008152; NA}	{EU881892.1; Argemone mexicana tyrosinase polyphenol oxidase (PPO) mRNA, complete cds}	{PF12142:Polyphenol oxidase middle domain PF00264:Common central domain of tyrosinase PF12143:Protein of unknown function (DUF_B2219)}
transcript_HQ_HBZL_transcript10132/f2p0/2015	2015	256.75	0	0	0	0	7.52	0	0	0	0	{KDP31579.1; hypothetical protein JCGZ_14804 [Jatropha curcas]}	{sp|B3TPQ6|BCUSY_MAGGA; Beta-cubebene synthase OS=Magnolia grandiflora PE=1 SV=1}	{jcu:105634372; - - - - -}	{NA}	{GO:0010333; terpene synthase activity; molecular_function GO:0016829; lyase activity; molecular_function GO:0000287; magnesium ion binding; molecular_function}	{XM_010546157.1; PREDICTED: Tarenaya hassleriana terpenoid synthase 1-like (LOC104817080), mRNA}	{PF03936:Terpene synthase family, metal binding domain}
transcript_HQ_HBZL_transcript10135/f3p0/2009	2009	433.68	12	34	27	29	12.75	0.33	1	0.89	0.88	{XP_010271732.1; PREDICTED: uncharacterized protein LOC104607726 [Nelumbo nucifera]}	{NA}	{nnu:104607726; - - - - -}	{NA}	{NA}	{XM_018978277.1; PREDICTED: Juglans regia uncharacterized LOC109001132 (LOC109001132), mRNA}	{NA}
transcript_HQ_HBZL_transcript10137/f2p0/2046	2046	254	0	0	0	0	7.32	0	0	0	0	{XP_012069750.1; PREDICTED: lysM domain receptor-like kinase 4 [Jatropha curcas]}	{sp|Q0GXS4|NFP_MEDTR; Serine/threonine receptor-like kinase NFP OS=Medicago truncatula GN=NFP PE=1 SV=1}	{jcu:105632077; K04733 IRAK4 interleukin-1 receptor-associated kinase 4 2.7.11.1 ko04064; Environmental Information Processing; Signal transduction; NF-kappa B signaling pathway | ko04620; Organismal Systems; Immune system; Toll-like receptor signaling pathway | ko04624; Organismal Systems; Immune system; Toll and Imd signaling pathway | ko04621; Organismal Systems; Immune system; NOD-like recept…	{NA}	{GO:0006468; protein phosphorylation; biological_process GO:0004672; protein kinase activity; molecular_function GO:0005524; ATP binding; molecular_function}	{XM_010248022.2; PREDICTED: Nelumbo nucifera serine/threonine receptor-like kinase NFP (LOC104589641), mRNA}	{PF00069:Protein kinase domain PF07714:Protein tyrosine kinase}
transcript_HQ_HBZL_transcript10139/f2p0/2056	2055	488.07	0	0	0	0	13.99	0	0	0	0	{XP_010272552.1; PREDICTED: extradiol ring-cleavage dioxygenase-like [Nelumbo nucifera]}	{sp|Q949R4|DIOXL_ARATH; Extradiol ring-cleavage dioxygenase OS=Arabidopsis thaliana GN=LIGB PE=2 SV=1}	{nnu:104596731; K15777 DOPA 4,5-DOPA dioxygenase extradiol 1.13.11.- ko00965; Metabolism; Biosynthesis of other secondary metabolites; Betalain biosynthesis}	{NA}	{GO:0008198; ferrous iron binding; molecular_function GO:0016491; oxidoreductase activity; molecular_function GO:0006725; cellular aromatic compound metabolic process; biological_process}	{XM_010258010.2; PREDICTED: Nelumbo nucifera extradiol ring-cleavage dioxygenase-like (LOC104596731), mRNA}	{PF02900:Catalytic LigB subunit of aromatic ring-opening dioxygenase}
transcript_HQ_HBZL_transcript1013/f2p0/3770	3770	976.96	47	18.29	0	0	14.41	0.66	0.27	0	0	{XP_010262154.1; PREDICTED: serine/threonine-protein kinase EDR1 isoform X2 [Nelumbo nucifera]}	{sp|Q9FPR3|EDR1_ARATH; Serine/threonine-protein kinase EDR1 OS=Arabidopsis thaliana GN=EDR1 PE=1 SV=1}	{cit:102628425; K04424 ZAK, MLTK sterile alpha motif and leucine zipper containing kinase AZK 2.7.11.25 ko04010; Environmental Information Processing; Signal transduction; MAPK signaling pathway}	{At5g11850; KOG0192 Tyrosine kinase specific for activated (GTP-bound) p21cdc42Hs T Signal transduction mechanisms ;}	{GO:0006468; protein phosphorylation; biological_process GO:0004672; protein kinase activity; molecular_function GO:0005524; ATP binding; molecular_function}	{XM_010263852.2; PREDICTED: Nelumbo nucifera serine/threonine-protein kinase EDR1 (LOC104600738), transcript variant X2, mRNA}	{PF07714:Protein tyrosine kinase PF00069:Protein kinase domain}
transcript_HQ_HBZL_transcript10141/f2p0/2049	2049	316.23	2	1	0	1	9.09	0.05	0.03	0	0.03	{XP_010255246.1; PREDICTED: uncharacterized protein LOC104595986 [Nelumbo nucifera]}	{NA}	{nnu:104595986; - - - - -}	{At5g41460; KOG2246 Galactosyltransferases G Carbohydrate transport and metabolism ;}	{GO:0016020; membrane; cellular_component GO:0016757; transferase activity, transferring glycosyl groups; molecular_function}	{XM_004245526.3; PREDICTED: Solanum lycopersicum uncharacterized LOC101249113 (LOC101249113), mRNA}	{PF02434:Fringe-like}
transcript_HQ_HBZL_transcript10142/f2p0/2156	2158	145	26.39	26.96	23.62	9.68	3.93	0.68	0.73	0.72	0.27	{XP_010248764.1; PREDICTED: uncharacterized membrane protein At3g27390-like [Nelumbo nucifera]}	{sp|Q8GUM4|Y3739_ARATH; Uncharacterized membrane protein At3g27390 OS=Arabidopsis thaliana GN=At3g27390 PE=1 SV=2}	{nnu:104591579; - - - - -}	{NA}	{GO:0019013; viral nucleocapsid; cellular_component}	{NA}	{PF00937:Coronavirus nucleocapsid protein}
transcript_HQ_HBZL_transcript10146/f4p0/2029	2030	526.01	0	0	7.99	0	15.29	0	0	0.26	0	{XP_010244260.1; PREDICTED: D-3-phosphoglycerate dehydrogenase 3, chloroplastic [Nelumbo nucifera]}	{sp|O49485|SERA1_ARATH; D-3-phosphoglycerate dehydrogenase 1, chloroplastic OS=Arabidopsis thaliana GN=PGDH1 PE=1 SV=1}	{csv:101221689; K00058 serA, PHGDH D-3-phosphoglycerate dehydrogenase 1.1.1.95 ko01200; Metabolism; Global and overview maps; Carbon metabolism | ko01230; Metabolism; Global and overview maps; Biosynthesis of amino acids | ko00680; Metabolism; Energy metabolism; Methane metabolism | ko00260; Metabolism; Amino acid metabolism; Glycine, serine and threonine metabolism}	{At4g34200; KOG0068 D-3-phosphoglycerate dehydrogenase, D-isomer-specific 2-hydroxy acid dehydrogenase superfamily E Amino acid transport and metabolism ;}	{GO:0055114; oxidation-reduction process; biological_process GO:0004616; phosphogluconate dehydrogenase (decarboxylating) activity; molecular_function GO:0016597; amino acid binding; molecular_function GO:0008152; NA GO:0051287; NAD binding; molecular_function GO:0016616; oxidoreductase activity, acting on the CH-OH group of donors, NAD or NADP as acceptor; molecular_function}	{XM_010272735.1; PREDICTED: Nelumbo nucifera D-3-phosphoglycerate dehydrogenase 1, chloroplastic-like (LOC104607170), mRNA}	{PF01842:ACT domain PF00389:D-isomer specific 2-hydroxyacid dehydrogenase, catalytic domain PF03720:UDP-glucose/GDP-mannose dehydrogenase family, UDP binding domain PF03446:NAD binding domain of 6-phosphogluconate dehydrogenase PF02826:D-isomer specific 2-hydroxyacid dehydrogenase, NAD binding domain}
transcript_HQ_HBZL_transcript10149/f2p0/2027	2026	148.45	3	7	2	1	4.32	0.08	0.2	0.07	0.03	{XP_010271240.1; PREDICTED: MACPF domain-containing protein At1g14780 [Nelumbo nucifera]}	{sp|Q8L612|MACP1_ARATH; MACPF domain-containing protein At1g14780 OS=Arabidopsis thaliana GN=At1g14780 PE=2 SV=1}	{nnu:104611121; - - - - -}	{NA}	{NA}	{NA}	{NA}
transcript_HQ_HBZL_transcript10150/f6p0/2034	2035	1674	0	0	1.99	0	48.51	0	0	0.06	0	{XP_007211396.1; hypothetical protein PRUPE_ppa003271mg [Prunus persica]}	{sp|O82043|ILV5_PEA; Ketol-acid reductoisomerase, chloroplastic OS=Pisum sativum GN=PGAAIR PE=2 SV=1}	{pmum:103342622; K00053 ilvC ketol-acid reductoisomerase 1.1.1.86 ko01210; Metabolism; Global and overview maps; 2-Oxocarboxylic acid metabolism | ko01230; Metabolism; Global and overview maps; Biosynthesis of amino acids | ko00290; Metabolism; Amino acid metabolism; Valine, leucine and isoleucine biosynthesis | ko00770; Metabolism; Metabolism of cofactors and vitamins; Pantothenate and CoA biosy…	{NA}	{GO:0009082; branched chain family amino acid biosynthetic process; biological_process GO:0055114; oxidation-reduction process; biological_process GO:0004455; ketol-acid reductoisomerase activity; molecular_function}	{XM_010270538.2; PREDICTED: Nelumbo nucifera ketol-acid reductoisomerase, chloroplastic-like (LOC104605687), mRNA}	{PF01450:Acetohydroxy acid isomeroreductase, catalytic domain}
transcript_HQ_HBZL_transcript10151/f5p0/2020	2020	515	8.22	2	0	0	15.05	0.23	0.06	0	0	{XP_010270524.1; PREDICTED: MLO-like protein 9 [Nelumbo nucifera]}	{sp|Q9FKY5|MLO10_ARATH; MLO-like protein 10 OS=Arabidopsis thaliana GN=MLO10 PE=2 SV=1}	{cit:102613602; K08472 MLO mlo protein - -}	{NA}	{GO:0016021; integral to membrane; cellular_component GO:0006952; defense response; biological_process}	{XR_736835.2; PREDICTED: Nelumbo nucifera MLO-like protein 9 (LOC104606831), transcript variant X3, misc_RNA}	{PF03094:Mlo family}
transcript_HQ_HBZL_transcript10152/f2p0/2020	2020	232	149	136	174	176	6.78	4.12	3.97	5.73	5.31	{XP_010250943.1; PREDICTED: autophagy-related protein 16-like [Nelumbo nucifera]}	{sp|Q6NNP0|ATG16_ARATH; Autophagy-related protein 16 OS=Arabidopsis thaliana GN=ATG16 PE=2 SV=1}	{nnu:104593020; K17890 ATG16L1 autophagy-related protein 16-1 - ko04140; Cellular Processes; Transport and catabolism; Autophagy - animal | ko04621; Organismal Systems; Immune system; NOD-like receptor signaling pathway}	{At5g50230; KOG0288 WD40 repeat protein TipD R General function prediction only ;}	{GO:0005515; protein binding; molecular_function GO:0005741; mitochondrial outer membrane; cellular_component GO:0008053; mitochondrial fusion; biological_process GO:0016021; integral to membrane; cellular_component GO:0003924; GTPase activity; molecular_function}	{XM_010250424.2; PREDICTED: Nelumbo nucifera autophagy-related protein 16-like (LOC104591555), mRNA}	{PF00400:WD domain, G-beta repeat PF04799:fzo-like conserved region}
transcript_HQ_HBZL_transcript10153/f4p0/2043	2043	446	58.71	150.7	187.44	137.02	12.87	1.6	4.34	6.09	4.08	{XP_010245198.1; PREDICTED: heat stress transcription factor A-1 [Nelumbo nucifera]}	{sp|Q84T61|HSFA1_ORYSJ; Heat stress transcription factor A-1 OS=Oryza sativa subsp. japonica GN=HSFA1 PE=2 SV=1}	{pop:POPTR_0003s09370g; K09419 HSFF heat shock transcription factor, other eukaryote - -}	{At1g32330; KOG0627 Heat shock transcription factor K Transcription ;}	{GO:0042803; protein homodimerization activity; molecular_function GO:0003700; sequence-specific DNA binding transcription factor activity; molecular_function GO:0006914; autophagy; biological_process GO:0008134; transcription factor binding; molecular_function GO:0005634; nucleus; cellular_component GO:0070840; dynein complex binding; molecular_function GO:0043565; sequence-specific DNA binding;…	{XM_019568596.1; PREDICTED: Lupinus angustifolius heat shock factor protein HSF8-like (LOC109333232), mRNA}	{PF04111:Autophagy protein Apg6 PF00447:HSF-type DNA-binding PF10473:Leucine-rich repeats of kinetochore protein Cenp-F/LEK1}
transcript_HQ_HBZL_transcript10154/f3p0/2057	2057	355.25	3	11.8	3.4	13.69	10.17	0.08	0.34	0.11	0.4	{CBI30444.3; unnamed protein product, partial [Vitis vinifera]}	{sp|Q9Y2M2|SSUH2_HUMAN; Protein SSUH2 homolog OS=Homo sapiens GN=SSUH2 PE=1 SV=1}	{pper:PRUPE_ppa006126mg; - - - - -}	{At2g38000; KOG2813 Predicted molecular chaperone, contains DnaJ domain O Posttranslational modification, protein turnover, chaperones ;}	{NA}	{XR_001953376.1; PREDICTED: Pyrus x bretschneideri protein SSUH2 homolog (LOC103949446), transcript variant X2, misc_RNA}	{NA}
transcript_HQ_HBZL_transcript10155/f4p0/2029	2029	635	1.95	17	53.15	25	18.46	0.05	0.49	1.74	0.75	{OMO54486.1; hypothetical protein CCACVL1_27767 [Corchorus capsularis]}	{sp|F4KA50|LRL22_ARATH; LEAF RUST 10 DISEASE-RESISTANCE LOCUS RECEPTOR-LIKE PROTEIN KINASE-like 2.2 OS=Arabidopsis thaliana GN=LRK10L-2.2 PE=3 SV=2}	{sind:105163672; - - - - -}	{NA}	{GO:0005524; ATP binding; molecular_function GO:0004672; protein kinase activity; molecular_function GO:0006468; protein phosphorylation; biological_process}	{NA}	{PF07714:Protein tyrosine kinase PF00069:Protein kinase domain}
transcript_HQ_HBZL_transcript10156/f2p0/2035	2035	998.94	0	43.52	88.87	65.05	28.95	0	1.26	2.9	1.95	{XP_010250761.1; PREDICTED: F-box/kelch-repeat protein At1g67480 [Nelumbo nucifera]}	{sp|Q9CAG8|FBK28_ARATH; F-box/kelch-repeat protein At1g67480 OS=Arabidopsis thaliana GN=At1g67480 PE=2 SV=1}	{nnu:104592913; - - - - -}	{At1g67480; KOG1072 FOG: Kelch repeat R General function prediction only ;}	{GO:0005515; protein binding; molecular_function}	{XM_002272709.4; PREDICTED: Vitis vinifera F-box/kelch-repeat protein At1g67480 (LOC100267636), mRNA}	{PF00646:F-box domain PF07646:Kelch motif PF01344:Kelch motif}
transcript_HQ_HBZL_transcript10158/f12p0/2047	2045	832.75	0	0	0	0	24	0	0	0	0	{XP_006489364.1; PREDICTED: LOW QUALITY PROTEIN: vacuole membrane protein KMS1-like [Citrus sinensis]}	{sp|Q5XF36|KMS1_ARATH; Vacuole membrane protein KMS1 OS=Arabidopsis thaliana GN=KMS1 PE=1 SV=1}	{nnu:104596508; K21248 VMP1 vacuole membrane protein 1 - ko04140; Cellular Processes; Transport and catabolism; Autophagy - animal}	{At1g05360; KOG1109 Vacuole membrane protein VMP1 R General function prediction only ;}	{NA}	{XM_002281747.4; PREDICTED: Vitis vinifera vacuole membrane protein KMS1 (LOC100246016), mRNA}	{NA}
transcript_HQ_HBZL_transcript10159/f2p0/2031	2032	373.74	5.09	3.47	0.89	5.22	10.85	0.14	0.1	0.03	0.16	{XP_018844973.1; PREDICTED: CLK4-associating serine/arginine rich protein isoform X2 [Juglans regia]}	{sp|Q8N2M8|CLASR_HUMAN; CLK4-associating serine/arginine rich protein OS=Homo sapiens GN=CLASRP PE=1 SV=4}	{nnu:104606326; K13168 SFRS16 splicing factor, arginine/serine-rich 16 - -}	{At4g36980; KOG2548 SWAP mRNA splicing regulator A RNA processing and modification ;}	{NA}	{XM_010271475.2; PREDICTED: Nelumbo nucifera CLK4-associating serine/arginine rich protein (LOC104606326), transcript variant X2, mRNA}	{NA}
transcript_HQ_HBZL_transcript1015/f15p0/3752	3752	2214	0	1	0	0	32.82	0	0.01	0	0	{XP_010270729.1; PREDICTED: protein argonaute 1-like isoform X1 [Nelumbo nucifera]}	{sp|Q7XSA2|AGO1B_ORYSJ; Protein argonaute 1B OS=Oryza sativa subsp. japonica GN=AGO1B PE=2 SV=3}	{rcu:8275074; K11593 ELF2C, AGO eukaryotic translation initiation factor 2C - -}	{At1g48410; KOG1041 Translation initiation factor 2C (eIF-2C) and related proteins J Translation, ribosomal structure and biogenesis ;}	{GO:0005515; protein binding; molecular_function GO:0003676; nucleic acid binding; molecular_function}	{XM_006478057.2; PREDICTED: Citrus sinensis protein argonaute 1 (LOC102616587), transcript variant X2, mRNA}	{PF02171:Piwi domain PF02170:PAZ domain}
transcript_HQ_HBZL_transcript10162/f2p0/2037	2034	115.44	0	3.05	0	0	3.35	0	0.09	0	0	{XP_010254980.1; PREDICTED: protein DA1-related 1-like [Nelumbo nucifera]}	{sp|P0C7Q8|DA1_ARATH; Protein DA1 OS=Arabidopsis thaliana GN=DA1 PE=1 SV=1}	{nnu:104595787; - - - - -}	{At1g19270; KOG1703 Adaptor protein Enigma and related PDZ-LIM proteins TZ Signal transduction mechanisms ; Cytoskeleton ;}	{GO:0008270; zinc ion binding; molecular_function}	{XM_010256679.2; PREDICTED: Nelumbo nucifera protein DA1-related 1-like (LOC104595787), transcript variant X2, mRNA}	{PF00412:LIM domain}
transcript_HQ_HBZL_transcript10163/f2p0/2024	2024	49.71	0	0	0	0	1.45	0	0	0	0	{XP_018812995.1; PREDICTED: jasmonic acid-amido synthetase JAR1-like isoform X1 [Juglans regia]}	{sp|Q6I581|GH35_ORYSJ; Jasmonic acid-amido synthetase JAR1 OS=Oryza sativa subsp. japonica GN=GH3.5 PE=2 SV=1}	{gra:105791543; K14506 JAR1 jasmonic acid-amino synthetase - ko04075; Environmental Information Processing; Signal transduction; Plant hormone signal transduction}	{NA}	{NA}	{XM_018972371.1; PREDICTED: Juglans regia jasmonic acid-amido synthetase JAR1-like (LOC108996457), transcript variant X3, mRNA}	{NA}
transcript_HQ_HBZL_transcript10165/f8p0/2023	2023	527.3	0	0	0	0	15.38	0	0	0	0	{XP_015894639.1; PREDICTED: uncharacterized protein LOC107428591 [Ziziphus jujuba]}	{NA}	{nnu:104593086; - - - - -}	{NA}	{GO:0005515; protein binding; molecular_function}	{NA}	{PF00564:PB1 domain}
transcript_HQ_HBZL_transcript10166/f13p0/1980	1980	2319	0	0	0	0	69.33	0	0	0	0	{XP_010251087.1; PREDICTED: protein DETOXIFICATION 29-like [Nelumbo nucifera]}	{sp|Q9LPV4|DTX31_ARATH; Protein DETOXIFICATION 31 OS=Arabidopsis thaliana GN=DTX31 PE=2 SV=1}	{nnu:104593100; K03327 TC.MATE, SLC47A, norM, mdtK, dinF multidrug resistance protein, MATE family - -}	{At1g12950; KOG1347 Uncharacterized membrane protein, predicted efflux pump R General function prediction only ;}	{GO:0016020; membrane; cellular_component GO:0015238; drug transmembrane transporter activity; molecular_function GO:0015297; antiporter activity; molecular_function GO:0055085; transmembrane transport; biological_process GO:0005887; integral to plasma membrane; cellular_component GO:0006855; drug transmembrane transport; biological_process}	{XM_019403036.1; PREDICTED: Nicotiana attenuata protein DETOXIFICATION 29-like (LOC109236806), transcript variant X2, mRNA}	{PF01554:MatE PF06305:Protein of unknown function (DUF1049)}
transcript_HQ_HBZL_transcript10167/f2p0/2002	2002	292	113.98	29.65	0	0	8.62	3.18	0.87	0	0	{XP_010250432.1; PREDICTED: histone-lysine N-methyltransferase ASHH1 isoform X1 [Nelumbo nucifera]}	{sp|Q84WW6|ASHH1_ARATH; Histone-lysine N-methyltransferase ASHH1 OS=Arabidopsis thaliana GN=ASHH1 PE=1 SV=1}	{nnu:104592685; - - - - -}	{At1g76710; KOG4442 Clathrin coat binding protein/Huntingtin interacting protein HIP1, involved in regulation of endocytosis U Intracellular trafficking, secretion, and vesicular transport ;}	{GO:0005515; protein binding; molecular_function}	{XM_010252148.2; PREDICTED: Nelumbo nucifera histone-lysine N-methyltransferase ASHH1 (LOC104592685), transcript variant X3, mRNA}	{PF00856:SET domain}
transcript_HQ_HBZL_transcript10168/f5p0/2051	2051	695	43.67	15	15	13	19.96	1.19	0.43	0.49	0.39	{GAU21247.1; hypothetical protein TSUD_11660 [Trifolium subterraneum]}	{sp|P93604|LRK10_WHEAT; Rust resistance kinase Lr10 OS=Triticum aestivum GN=LRK10 PE=2 SV=1}	{vra:106756549; K04733 IRAK4 interleukin-1 receptor-associated kinase 4 2.7.11.1 ko04064; Environmental Information Processing; Signal transduction; NF-kappa B signaling pathway | ko04620; Organismal Systems; Immune system; Toll-like receptor signaling pathway | ko04624; Organismal Systems; Immune system; Toll and Imd signaling pathway | ko04621; Organismal Systems; Immune system; NOD-like recept…	{At1g67000; KOG1187 Serine/threonine protein kinase T Signal transduction mechanisms ;}	{GO:0004672; protein kinase activity; molecular_function GO:0006468; protein phosphorylation; biological_process GO:0030247; polysaccharide binding; molecular_function GO:0005524; ATP binding; molecular_function}	{NA}	{PF00069:Protein kinase domain PF07714:Protein tyrosine kinase PF13947:Wall-associated receptor kinase galacturonan-binding}
transcript_HQ_HBZL_transcript10169/f2p0/2043	2044	212.42	0	0	0	0	6.13	0	0	0	0	{XP_010250611.1; PREDICTED: protein MICRORCHIDIA 7 isoform X1 [Nelumbo nucifera]}	{sp|F4JRS4|MORC7_ARATH; Protein MICRORCHIDIA 7 OS=Arabidopsis thaliana GN=MORC7 PE=1 SV=1}	{nnu:104592813; - - - - -}	{At5g50780; KOG1845 MORC family ATPases D Cell cycle control, cell division, chromosome partitioning ;}	{GO:0020037; heme binding; molecular_function GO:0016491; oxidoreductase activity; molecular_function GO:0051536; iron-sulfur cluster binding; molecular_function GO:0055114; oxidation-reduction process; biological_process}	{XM_008792565.1; PREDICTED: Phoenix dactylifera protein MICRORCHIDIA 7-like (LOC103707873), mRNA}	{PF01077:Nitrite and sulphite reductase 4Fe-4S domain}
transcript_HQ_HBZL_transcript1016/f2p0/3754	3753	675.54	0	1	0	0.98	10.01	0	0.01	0	0.02	{XP_002276600.1; PREDICTED: importin subunit beta-1 [Vitis vinifera]}	{sp|Q9FJD4|IMB1_ARATH; Importin subunit beta-1 OS=Arabidopsis thaliana GN=KPNB1 PE=1 SV=1}	{rcu:8275057; K14293 KPNB1, IPO1 importin subunit beta-1 - ko03013; Genetic Information Processing; Translation; RNA transport}	{At5g53480; KOG1241 Karyopherin (importin) beta 1 YU Nuclear structure ; Intracellular trafficking, secretion, and vesicular transport ;}	{GO:0008536; Ran GTPase binding; molecular_function GO:0006886; intracellular protein transport; biological_process GO:0043248; proteasome assembly; biological_process GO:0005515; protein binding; molecular_function}	{XM_010268291.2; PREDICTED: Nelumbo nucifera importin subunit beta-1-like (LOC104604059), mRNA}	{PF03810:Importin-beta N-terminal domain PF02985:HEAT repeat PF10508:Proteasome non-ATPase 26S subunit}
transcript_HQ_HBZL_transcript10170/f2p0/2025	2025	456.48	0	0	0	0	13.3	0	0	0	0	{XP_002268514.1; PREDICTED: protein SRC2 homolog [Vitis vinifera]}	{sp|O04133|SRC2_SOYBN; Protein SRC2 OS=Glycine max GN=SRC2 PE=2 SV=1}	{vvi:100245456; - - - - -}	{NA}	{GO:0006351; transcription, DNA-dependent; biological_process GO:0005515; protein binding; molecular_function}	{NA}	{PF00168:C2 domain PF02150:RNA polymerases M/15 Kd subunit}
transcript_HQ_HBZL_transcript10171/f2p0/2045	2045	299.95	1	0	0	0	8.64	0.03	0	0	0	{XP_010250571.1; PREDICTED: vacuolar protein 8 [Nelumbo nucifera]}	{sp|Q8GUG9|PUB11_ARATH; U-box domain-containing protein 11 OS=Arabidopsis thaliana GN=PUB11 PE=2 SV=2}	{nnu:104592787; - - - - -}	{At5g50900; KOG0167 FOG: Armadillo/beta-catenin-like repeats S Function unknown ;}	{GO:0005515; protein binding; molecular_function}	{XM_008241316.2; PREDICTED: Prunus mume uncharacterized LOC103338130 (LOC103338130), mRNA}	{PF00514:Armadillo/beta-catenin-like repeat PF02985:HEAT repeat}
transcript_HQ_HBZL_transcript10172/f7p0/2072	2068	306	0	0	0	0	8.71	0	0	0	0	{XP_010260734.1; PREDICTED: cationic amino acid transporter 5-like [Nelumbo nucifera]}	{sp|O64759|CAAT5_ARATH; Cationic amino acid transporter 5 OS=Arabidopsis thaliana GN=CAT5 PE=1 SV=1}	{nnu:104599752; - - - - -}	{At2g34960; KOG1286 Amino acid transporters E Amino acid transport and metabolism ;}	{GO:0006810; transport; biological_process GO:0016021; integral to membrane; cellular_component GO:0009847; spore germination; biological_process GO:0003333; amino acid transmembrane transport; biological_process GO:0055085; transmembrane transport; biological_process GO:0015171; amino acid transmembrane transporter activity; molecular_function GO:0016020; membrane; cellular_component}	{XM_008385044.2; PREDICTED: Malus x domestica cationic amino acid transporter 5 (LOC103445983), mRNA}	{PF03845:Spore germination protein PF00324:Amino acid permease PF13520:Amino acid permease}
transcript_HQ_HBZL_transcript10173/f3p0/2026	2026	266.17	0	0	1	0	7.75	0	0	0.03	0	{XP_010268836.1; PREDICTED: F-box protein At1g61340-like [Nelumbo nucifera]}	{sp|O65416|SKI27_ARATH; F-box protein SKIP27 OS=Arabidopsis thaliana GN=SKIP27 PE=1 SV=2}	{vvi:100246508; - - - - -}	{NA}	{GO:0005515; protein binding; molecular_function}	{NA}	{PF00646:F-box domain PF12937:F-box-like}
transcript_HQ_HBZL_transcript10174/f5p0/2026	2026	385	0	0	0	9.99	11.21	0	0	0	0.3	{XP_010241517.1; PREDICTED: inositol transporter 1 [Nelumbo nucifera]}	{sp|Q8VZR6|INT1_ARATH; Inositol transporter 1 OS=Arabidopsis thaliana GN=INT1 PE=1 SV=1}	{egu:105038633; K08150 SLC2A13, ITR MFS transporter, SP family, solute carrier family 2 (myo-inositol transporter), member 13 - -}	{At2g43330; KOG0254 Predicted transporter (major facilitator superfamily) R General function prediction only ;}	{GO:0022857; transmembrane transporter activity; molecular_function GO:0016021; integral to membrane; cellular_component GO:0055085; transmembrane transport; biological_process}	{XM_010243217.2; PREDICTED: Nelumbo nucifera inositol transporter 1 (LOC104586093), transcript variant X3, mRNA}	{PF07690:Major Facilitator Superfamily PF00083:Sugar (and other) transporter}
transcript_HQ_HBZL_transcript10175/f6p0/1962	1962	167.39	17.77	51.95	89.47	67.06	5.06	0.51	1.57	3.05	2.09	{XP_012065203.1; PREDICTED: electron transfer flavoprotein-ubiquinone oxidoreductase, mitochondrial [Jatropha curcas]}	{sp|O22854|ETFQO_ARATH; Electron transfer flavoprotein-ubiquinone oxidoreductase, mitochondrial OS=Arabidopsis thaliana GN=ETFQO PE=2 SV=1}	{jcu:105628408; K00311 ETFDH electron-transferring-flavoprotein dehydrogenase 1.5.5.1 -}	{At2g43400; KOG2415 Electron transfer flavoprotein ubiquinone oxidoreductase C Energy production and conversion ;}	{GO:0016491; oxidoreductase activity; molecular_function GO:0055114; oxidation-reduction process; biological_process GO:0071949; FAD binding; molecular_function}	{XM_010260221.2; PREDICTED: Nelumbo nucifera electron transfer flavoprotein-ubiquinone oxidoreductase, mitochondrial (LOC104598262), transcript variant X1, mRNA}	{PF12831:FAD dependent oxidoreductase PF00070:Pyridine nucleotide-disulphide oxidoreductase PF01266:FAD dependent oxidoreductase PF07992:Pyridine nucleotide-disulphide oxidoreductase PF01494:FAD binding domain}
transcript_HQ_HBZL_transcript10177/f3p0/2023	2023	295.61	0	0	0	0	8.62	0	0	0	0	{XP_010250597.1; PREDICTED: probable protein S-acyltransferase 7 [Nelumbo nucifera]}	{sp|Q0WQK2|ZDHC9_ARATH; Probable protein S-acyltransferase 7 OS=Arabidopsis thaliana GN=PAT07 PE=1 SV=1}	{nnu:104592803; K16675 ZDHHC9_14_18 palmitoyltransferase ZDHHC9/14/18 2.3.1.225 ko04391; Environmental Information Processing; Signal transduction; Hippo signaling pathway - fly}	{At5g41060; KOG1311 DHHC-type Zn-finger proteins R General function prediction only ;}	{NA}	{XM_002284216.3; PREDICTED: Vitis vinifera probable protein S-acyltransferase 7 (LOC100262775), transcript variant X1, mRNA}	{NA}
transcript_HQ_HBZL_transcript10178/f4p0/2008	2009	282	43.05	18.91	16.03	7.23	8.29	1.2	0.56	0.53	0.22	{XP_010244535.1; PREDICTED: protein indeterminate-domain 16-like [Nelumbo nucifera]}	{sp|F4IPE3|IDD15_ARATH; Protein SHOOT GRAVITROPISM 5 OS=Arabidopsis thaliana GN=SGR5 PE=1 SV=1}	{nnu:104588322; - - - - -}	{At2g01940; KOG1721 FOG: Zn-finger R General function prediction only ;}	{GO:0006281; DNA repair; biological_process GO:0016592; mediator complex; cellular_component GO:0046872; metal ion binding; molecular_function GO:0008013; beta-catenin binding; molecular_function GO:0010468; regulation of gene expression; biological_process GO:0008270; zinc ion binding; molecular_function}	{XM_019410662.1; PREDICTED: Nicotiana attenuata protein SHOOT GRAVITROPISM 5-like (LOC109243693), mRNA}	{PF13465:Zinc-finger double domain PF10955:Protein of unknown function (DUF2757) PF13912:C2H2-type zinc finger PF12144:Eukaryotic Mediator 12 catenin-binding domain PF07975:TFIIH C1-like domain PF00096:Zinc finger, C2H2 type}
transcript_HQ_HBZL_transcript10182/f2p0/2028	2028	90	9	0	0	0	2.62	0.25	0	0	0	{XP_019074475.1; PREDICTED: LEAF RUST 10 DISEASE-RESISTANCE LOCUS RECEPTOR-LIKE PROTEIN KINASE-like 1.1 [Vitis vinifera]}	{sp|Q9C6K9|LRL11_ARATH; LEAF RUST 10 DISEASE-RESISTANCE LOCUS RECEPTOR-LIKE PROTEIN KINASE-like 1.1 OS=Arabidopsis thaliana GN=LRK10L-1.1 PE=2 SV=1}	{vvi:100259351; - - - - -}	{At1g25390; KOG1187 Serine/threonine protein kinase T Signal transduction mechanisms ;}	{GO:0006468; protein phosphorylation; biological_process GO:0004672; protein kinase activity; molecular_function GO:0005524; ATP binding; molecular_function}	{XM_018117878.1; PREDICTED: Theobroma cacao LEAF RUST 10 DISEASE-RESISTANCE LOCUS RECEPTOR-LIKE PROTEIN KINASE-like 1.2 (LOC18604172), transcript variant X4, mRNA}	{PF00069:Protein kinase domain PF07714:Protein tyrosine kinase}
transcript_HQ_HBZL_transcript10185/f2p0/2018	2018	40185.6	0	0	0	0	1175.74	0	0	0	0	{XP_010245321.1; PREDICTED: polyphenol oxidase, chloroplastic-like [Nelumbo nucifera]}	{sp|P43309|PPO_MALDO; Polyphenol oxidase, chloroplastic OS=Malus domestica PE=2 SV=1}	{vvi:100266870; K00422 E1.10.3.1 polyphenol oxidase 1.10.3.1 ko00350; Metabolism; Amino acid metabolism; Tyrosine metabolism | ko00950; Metabolism; Biosynthesis of other secondary metabolites; Isoquinoline alkaloid biosynthesis}	{NA}	{GO:0008152; NA GO:0004097; catechol oxidase activity; molecular_function GO:0016491; oxidoreductase activity; molecular_function GO:0055114; oxidation-reduction process; biological_process}	{AC253862.1; Aquilegia coerulea clone COL04-D05, complete sequence}	{PF00264:Common central domain of tyrosinase PF12143:Protein of unknown function (DUF_B2219) PF12142:Polyphenol oxidase middle domain}
transcript_HQ_HBZL_transcript10186/f12p0/2019	2019	1392.52	0	0	0	0	40.72	0	0	0	0	{OAY34089.1; hypothetical protein MANES_13G149100 [Manihot esculenta]}	{NA}	{vvi:100241481; - - - - -}	{NA}	{NA}	{XM_010270455.2; PREDICTED: Nelumbo nucifera uncharacterized LOC104605622 (LOC104605622), transcript variant X2, mRNA}	{NA}
transcript_HQ_HBZL_transcript10187/f2p0/2039	2040	686	4	264.55	213.23	271.01	19.83	0.11	7.64	6.94	8.08	{XP_002279898.1; PREDICTED: probable lysophospholipase BODYGUARD 3 [Vitis vinifera]}	{sp|O22977|BDG3_ARATH; Probable lysophospholipase BODYGUARD 3 OS=Arabidopsis thaliana GN=BDG3 PE=2 SV=1}	{nnu:104593607; - - - - -}	{At4g24140; KOG1454 Predicted hydrolase/acyltransferase (alpha/beta hydrolase superfamily) R General function prediction only ;}	{GO:0006629; lipid metabolic process; biological_process GO:0016788; hydrolase activity, acting on ester bonds; molecular_function GO:0016787; hydrolase activity; molecular_function GO:0009058; biosynthetic process; biological_process}	{XM_019577772.1; PREDICTED: Lupinus angustifolius probable lysophospholipase BODYGUARD 3 (LOC109340178), mRNA}	{PF00975:Thioesterase domain PF01764:Lipase (class 3) PF06821:Serine hydrolase PF07819:PGAP1-like protein}
transcript_HQ_HBZL_transcript10188/f3p0/2024	2024	173.07	1	0	0	0	5.05	0.03	0	0	0	{XP_010244313.1; PREDICTED: protein indeterminate-domain 2-like [Nelumbo nucifera]}	{sp|Q9LVQ7|IDD1_ARATH; Protein indeterminate-domain 1 OS=Arabidopsis thaliana GN=IDD1 PE=1 SV=1}	{nnu:104595745; - - - - -}	{At5g66730; KOG1721 FOG: Zn-finger R General function prediction only ;}	{NA}	{AC148484.17; Medicago truncatula chromosome 8 clone mth2-46g10, complete sequence}	{NA}
transcript_HQ_HBZL_transcript10189/f2p0/2022	2023	70.98	0	0	0	0	2.07	0	0	0	0	{XP_010272026.1; PREDICTED: cyclin-D1-1-like isoform X3 [Nelumbo nucifera]}	{sp|P42751|CCD11_ARATH; Cyclin-D1-1 OS=Arabidopsis thaliana GN=CYCD1-1 PE=1 SV=3}	{nnu:104595600; K18810 CYCD1_2_4 cyclin D1/2/4, plant - -}	{At1g70210; KOG0656 G1/S-specific cyclin D D Cell cycle control, cell division, chromosome partitioning ;}	{GO:0005634; nucleus; cellular_component}	{NA}	{PF02984:Cyclin, C-terminal domain}
transcript_HQ_HBZL_transcript1018/f4p0/3743	3743	5034.53	4.09	1.03	3.74	0	74.83	0.06	0.02	0.06	0	{XP_010254698.1; PREDICTED: BEL1-like homeodomain protein 6 [Nelumbo nucifera]}	{sp|Q9SIW1|BLH7_ARATH; BEL1-like homeodomain protein 7 OS=Arabidopsis thaliana GN=BLH7 PE=2 SV=1}	{nnu:104595602; - - - - -}	{At2g16400; KOG0773 Transcription factor MEIS1 and related HOX domain proteins K Transcription ;}	{GO:0003677; DNA binding; molecular_function GO:0006355; regulation of transcription, DNA-dependent; biological_process}	{XM_010649388.2; PREDICTED: Vitis vinifera BEL1-like homeodomain protein 6 (LOC100262246), mRNA}	{PF00046:Homeobox domain PF05920:Homeobox KN domain}
transcript_HQ_HBZL_transcript10192/f2p0/1998	1998	15.69	0	0	0	0	0.46	0	0	0	0	{XP_018827751.1; PREDICTED: probable polyamine transporter At3g19553 [Juglans regia]}	{sp|Q9LH39|PHSD_ARATH; Probable polyamine transporter At3g19553 OS=Arabidopsis thaliana GN=At3g19553 PE=3 SV=1}	{pper:PRUPE_ppa004526mg; - - - - -}	{At3g19553; KOG1287 Amino acid transporters E Amino acid transport and metabolism ;}	{GO:0055085; transmembrane transport; biological_process GO:0015171; amino acid transmembrane transporter activity; molecular_function GO:0003333; amino acid transmembrane transport; biological_process GO:0006810; transport; biological_process GO:0016020; membrane; cellular_component}	{XM_010273923.2; PREDICTED: Nelumbo nucifera probable polyamine transporter At3g19553 (LOC104608058), mRNA}	{PF13520:Amino acid permease PF00324:Amino acid permease}
transcript_HQ_HBZL_transcript10193/f2p0/2041	2041	411.92	44	26.01	11.29	22	11.9	1.2	0.75	0.37	0.66	{KDO69017.1; hypothetical protein CISIN_1g032990mg [Citrus sinensis]}	{sp|P59234|YIPL_SOLTU; Protein yippee-like OS=Solanum tuberosum PE=2 SV=1}	{nnu:104596941; - - - - -}	{At2g40110; KOG3399 Predicted Yippee-type zinc-binding protein R General function prediction only ;}	{GO:0003677; DNA binding; molecular_function GO:0003899; DNA-directed RNA polymerase activity; molecular_function GO:0006351; transcription, DNA-dependent; biological_process}	{XM_019594785.1; PREDICTED: Lupinus angustifolius protein yippee-like (LOC109352640), transcript variant X3, mRNA}	{PF01194:RNA polymerases N / 8 kDa subunit}
transcript_HQ_HBZL_transcript10195/f5p0/2028	2029	119.6	0	0	0	0	3.48	0	0	0	0	{XP_010252642.1; PREDICTED: U4/U6.U5 tri-snRNP-associated protein 2 [Nelumbo nucifera]}	{sp|Q3TIX9|SNUT2_MOUSE; U4/U6.U5 tri-snRNP-associated protein 2 OS=Mus musculus GN=Usp39 PE=1 SV=2}	{nnu:104594165; K12847 USP39, SAD1 U4/U6.U5 tri-snRNP-associated protein 2 - ko03040; Genetic Information Processing; Transcription; Spliceosome}	{At4g22290_2; KOG2026 Spindle pole body protein - Sad1p Z Cytoskeleton ;}	{GO:0008270; zinc ion binding; molecular_function GO:0016579; protein deubiquitination; biological_process GO:0036459; NA}	{XM_008239855.2; PREDICTED: Prunus mume U4/U6.U5 tri-snRNP-associated protein 2-like (LOC103336756), transcript variant X4, mRNA}	{PF02148:Zn-finger in ubiquitin-hydrolases and other protein PF00443:Ubiquitin carboxyl-terminal hydrolase}
transcript_HQ_HBZL_transcript10197/f3p0/2022	2023	868	0	16.43	10.21	21.6	25.32	0	0.48	0.34	0.65	{XP_010271915.1; PREDICTED: stomatal closure-related actin-binding protein 1 isoform X1 [Nelumbo nucifera]}	{sp|O48791|SCAB1_ARATH; Stomatal closure-related actin-binding protein 1 OS=Arabidopsis thaliana GN=SCAB1 PE=1 SV=1}	{cit:102622518; - - - - -}	{NA}	{GO:0016573; histone acetylation; biological_process GO:0003779; actin binding; molecular_function}	{XM_010273614.2; PREDICTED: Nelumbo nucifera stomatal closure-related actin-binding protein 1 (LOC104607860), transcript variant X2, mRNA}	{PF15460:Something about silencing, SAS, complex subunit 4 PF16711:Actin-binding domain of plant-specific actin-binding protein}
transcript_HQ_HBZL_transcript10198/f2p0/2039	2035	471.56	1	0	0	17.41	13.67	0.03	0	0	0.52	{XP_017971247.1; PREDICTED: probable terpene synthase 9 [Theobroma cacao]}	{sp|B9RPM3|TPS9_RICCO; Probable terpene synthase 9 OS=Ricinus communis GN=TPS9 PE=3 SV=1}	{vvi:100260170; - - - - -}	{NA}	{GO:0008152; NA GO:0010333; terpene synthase activity; molecular_function GO:0016829; lyase activity; molecular_function GO:0000287; magnesium ion binding; molecular_function}	{NA}	{PF03936:Terpene synthase family, metal binding domain PF01397:Terpene synthase, N-terminal domain}
transcript_HQ_HBZL_transcript10199/f2p0/2017	2017	181.01	10.05	10.79	0	0	5.3	0.28	0.32	0	0	{XP_010264117.1; PREDICTED: glycosyltransferase-like At2g41451 [Nelumbo nucifera]}	{sp|Q9C9Z9|ELD1_ARATH; Glycosyltransferase-like KOBITO 1 OS=Arabidopsis thaliana GN=ELD1 PE=1 SV=1}	{vvi:100261913; - - - - -}	{NA}	{NA}	{XM_010243071.2; PREDICTED: Nelumbo nucifera glycosyltransferase-like At2g41451 (LOC104585997), mRNA}	{NA}
transcript_HQ_HBZL_transcript1019/f2p0/3753	3754	2321.73	41.35	18.97	0	0	34.4	0.58	0.28	0	0	{XP_010273908.1; PREDICTED: phosphoinositide phosphatase SAC3-like isoform X2 [Nelumbo nucifera]}	{sp|Q94A27|SAC2_ARATH; Phosphoinositide phosphatase SAC2 OS=Arabidopsis thaliana GN=SAC2 PE=2 SV=1}	{vvi:100242326; - - - - -}	{At3g43220; KOG1888 Putative phosphoinositide phosphatase I Lipid transport and metabolism ;}	{GO:0042578; phosphoric ester hydrolase activity; molecular_function}	{XM_010263408.2; PREDICTED: Nelumbo nucifera phosphoinositide phosphatase SAC2-like (LOC104600468), transcript variant X1, mRNA}	{PF02383:SacI homology domain}
transcript_HQ_HBZL_transcript101/f2p0/5894	5895	2509.36	44.31	59.74	0	0	23.11	0.39	0.55	0	0	{XP_010250219.1; PREDICTED: uncharacterized protein LOC104592509 isoform X2 [Nelumbo nucifera]}	{sp|Q84WU2|UBP13_ARATH; Ubiquitin carboxyl-terminal hydrolase 13 OS=Arabidopsis thaliana GN=UBP13 PE=2 SV=1}	{nnu:104592509; - - - - -}	{At2g25320; KOG1987 Speckle-type POZ protein SPOP and related proteins with TRAF, MATH and BTB/POZ domains DR Cell cycle control, cell division, chromosome partitioning ; General function prediction only ;}	{GO:0006281; DNA repair; biological_process GO:0005515; protein binding; molecular_function}	{XM_010243280.2; PREDICTED: Nelumbo nucifera uncharacterized LOC104586136 (LOC104586136), mRNA}	{PF00917:MATH domain PF14631:Fanconi anaemia protein FancD2 nuclease}
transcript_HQ_HBZL_transcript10200/f2p0/2028	2028	250.54	0	0	0	0	7.29	0	0	0	0	{XP_010248392.1; PREDICTED: pyruvate kinase, cytosolic isozyme [Nelumbo nucifera]}	{sp|Q42806|KPYC_SOYBN; Pyruvate kinase, cytosolic isozyme OS=Glycine max PE=2 SV=1}	{nnu:104591283; K00873 PK, pyk pyruvate kinase 2.7.1.40 ko01200; Metabolism; Global and overview maps; Carbon metabolism | ko01230; Metabolism; Global and overview maps; Biosynthesis of amino acids | ko00010; Metabolism; Carbohydrate metabolism; Glycolysis / Gluconeogenesis | ko00620; Metabolism; Carbohydrate metabolism; Pyruvate metabolism | ko00230; Metabolism; Nucleotide metabolism; Purine met…	{At5g08570; KOG2323 Pyruvate kinase G Carbohydrate transport and metabolism ;}	{GO:0000287; magnesium ion binding; molecular_function GO:0030955; potassium ion binding; molecular_function GO:0004743; pyruvate kinase activity; molecular_function GO:0003824; NA GO:0006096; glycolysis; biological_process}	{XM_010276641.2; PREDICTED: Nelumbo nucifera pyruvate kinase, cytosolic isozyme (LOC104610148), transcript variant X5, mRNA}	{PF00224:Pyruvate kinase, barrel domain PF03328:HpcH/HpaI aldolase/citrate lyase family}
transcript_HQ_HBZL_transcript10202/f4p0/2030	2030	269	231.85	39.76	3	0	7.82	6.38	1.15	0.1	0	{XP_010267020.1; PREDICTED: uncharacterized protein LOC104604409 [Nelumbo nucifera]}	{NA}	{vvi:104880635; - - - - -}	{NA}	{GO:0019089; transmission of virus; biological_process}	{NA}	{PF05318:Tombusvirus movement protein}
transcript_HQ_HBZL_transcript10203/f2p0/2020	2020	980.11	18	40.06	56.11	31.08	28.64	0.5	1.17	1.85	0.94	{XP_002312012.1; putative adenosine kinase family protein [Populus trichocarpa]}	{sp|Q9LZG0|ADK2_ARATH; Adenosine kinase 2 OS=Arabidopsis thaliana GN=ADK2 PE=1 SV=1}	{vvi:100246211; K00856 E2.7.1.20, ADK adenosine kinase 2.7.1.20 ko00230; Metabolism; Nucleotide metabolism; Purine metabolism}	{At5g03300; KOG2854 Possible pfkB family carbohydrate kinase G Carbohydrate transport and metabolism ;}	{GO:0004373; glycogen (starch) synthase activity; molecular_function GO:0005978; glycogen biosynthetic process; biological_process}	{XM_002311976.2; Populus trichocarpa putative adenosine kinase family protein (POPTR_0008s03800g) mRNA, complete cds}	{PF05693:Glycogen synthase}
transcript_HQ_HBZL_transcript10213/f2p0/2022	2022	35.91	0	0	0	0	1.05	0	0	0	0	{XP_010263610.1; PREDICTED: uncharacterized protein LOC104601826 [Nelumbo nucifera]}	{NA}	{cit:102612514; - - - - -}	{NA}	{NA}	{NA}	{NA}
transcript_HQ_HBZL_transcript10214/f2p0/2062	2060	1469.99	0	27.06	0	0	42.02	0	0.77	0	0	{XP_010263504.1; PREDICTED: nicotinate phosphoribosyltransferase 2-like [Nelumbo nucifera]}	{sp|Q8RWM2|NPRT1_ARATH; Nicotinate phosphoribosyltransferase 1 OS=Arabidopsis thaliana GN=NAPRT1 PE=2 SV=1}	{nnu:104606581; K00763 pncB, NAPRT1 nicotinate phosphoribosyltransferase 6.3.4.21 ko00760; Metabolism; Metabolism of cofactors and vitamins; Nicotinate and nicotinamide metabolism}	{At2g23420; KOG2511 Nicotinic acid phosphoribosyltransferase H Coenzyme transport and metabolism ;}	{GO:0016763; transferase activity, transferring pentosyl groups; molecular_function}	{XM_010265203.2; PREDICTED: Nelumbo nucifera nicotinate phosphoribosyltransferase 2-like (LOC104601745), transcript variant X2, mRNA}	{PF02749:Quinolinate phosphoribosyl transferase, N-terminal domain}
transcript_HQ_HBZL_transcript10215/f3p0/2048	2047	8160.34	0	0	0	0	234.93	0	0	0	0	{XP_010267831.1; PREDICTED: chitin-inducible gibberellin-responsive protein 1-like [Nelumbo nucifera]}	{sp|Q69VG1|CIGR1_ORYSJ; Chitin-inducible gibberellin-responsive protein 1 OS=Oryza sativa subsp. japonica GN=CIGR1 PE=2 SV=1}	{nta:107786387; - - - - -}	{NA}	{NA}	{XM_010093994.1; Morus notabilis hypothetical protein partial mRNA}	{NA}
transcript_HQ_HBZL_transcript10217/f5p0/2031	2031	191.33	0	0	0	0	5.56	0	0	0	0	{XP_010275071.1; PREDICTED: CBL-interacting serine/threonine-protein kinase 23-like isoform X1 [Nelumbo nucifera]}	{sp|Q93VD3|CIPKN_ARATH; CBL-interacting serine/threonine-protein kinase 23 OS=Arabidopsis thaliana GN=CIPK23 PE=1 SV=1}	{fve:101309707; - - - - -}	{At1g30270; KOG0583 Serine/threonine protein kinase T Signal transduction mechanisms ;}	{GO:0016773; phosphotransferase activity, alcohol group as acceptor; molecular_function GO:0007165; signal transduction; biological_process GO:0005524; ATP binding; molecular_function GO:0016020; membrane; cellular_component GO:0006468; protein phosphorylation; biological_process GO:0004672; protein kinase activity; molecular_function}	{XM_010276770.2; PREDICTED: Nelumbo nucifera CBL-interacting serine/threonine-protein kinase 23-like (LOC104610244), transcript variant X2, mRNA}	{PF00069:Protein kinase domain PF07714:Protein tyrosine kinase PF06293:Lipopolysaccharide kinase (Kdo/WaaP) family PF03822:NAF domain}
transcript_HQ_HBZL_transcript10218/f2p0/2041	2041	1179.51	0	0	0	0	34.07	0	0	0	0	{XP_008801108.1; PREDICTED: serine/arginine-rich-splicing factor SR34 [Phoenix dactylifera]}	{sp|F4JHI7|SR34B_ARATH; Serine/arginine-rich splicing factor SR34B OS=Arabidopsis thaliana GN=SR34B PE=2 SV=1}	{pda:103707242; K12890 SFRS1, ASF, SF2 splicing factor, arginine/serine-rich 1 - ko03040; Genetic Information Processing; Transcription; Spliceosome | ko04657; Organismal Systems; Immune system; IL-17 signaling pathway | ko05168; Human Diseases; Infectious diseases: Viral; Herpes simplex infection}	{At4g02430; KOG0105 Alternative splicing factor ASF/SF2 (RRM superfamily) A RNA processing and modification ;}	{GO:0003676; nucleic acid binding; molecular_function}	{XR_001929025.1; PREDICTED: Theobroma cacao serine/arginine-rich-splicing factor SR34 (LOC18613557), transcript variant X3, misc_RNA}	{PF16367:RNA recognition motif PF00076:RNA recognition motif. (a.k.a. RRM, RBD, or RNP domain)}
transcript_HQ_HBZL_transcript10219/f2p0/2029	2029	62.88	0	0.68	0	0	1.83	0	0.02	0	0	{XP_002268764.1; PREDICTED: patellin-4 [Vitis vinifera]}	{sp|Q94C59|PATL4_ARATH; Patellin-4 OS=Arabidopsis thaliana GN=PATL4 PE=1 SV=2}	{vvi:100262778; - - - - -}	{At1g30690; KOG1471 Phosphatidylinositol transfer protein SEC14 and related proteins I Lipid transport and metabolism ;}	{NA}	{XM_008227453.2; PREDICTED: Prunus mume patellin-4 (LOC103325298), mRNA}	{NA}
transcript_HQ_HBZL_transcript10221/f2p0/2016	2017	745	0	0	0	0	21.81	0	0	0	0	{XP_010245498.1; PREDICTED: transcription factor TGA2.2-like isoform X2 [Nelumbo nucifera]}	{sp|Q6IVC2|TGAL1_ORYSJ; Transcription factor TGAL1 OS=Oryza sativa subsp. japonica GN=TGAL1 PE=1 SV=2}	{vvi:100242879; K14431 TGA transcription factor TGA - ko04075; Environmental Information Processing; Signal transduction; Plant hormone signal transduction}	{NA}	{GO:0042025; host cell nucleus; cellular_component GO:0003677; DNA binding; molecular_function GO:0005634; nucleus; cellular_component GO:0045893; positive regulation of transcription, DNA-dependent; biological_process GO:0006355; regulation of transcription, DNA-dependent; biological_process GO:0043565; sequence-specific DNA binding; molecular_function GO:0006351; transcription, DNA-dependent; b…	{XM_010249176.2; PREDICTED: Nelumbo nucifera transcription factor TGA2.2-like (LOC104590490), transcript variant X1, mRNA}	{PF03131:bZIP Maf transcription factor PF03584:Herpesvirus ICP4-like protein N-terminal region PF00170:bZIP transcription factor PF14144:Seed dormancy control PF07716:Basic region leucine zipper}
transcript_HQ_HBZL_transcript10224/f9p0/2080	2080	2002.69	0	0	0	0	56.62	0	0	0	0	{XP_010245067.2; PREDICTED: eukaryotic translation initiation factor 5 [Nelumbo nucifera]}	{sp|P48724|IF5_PHAVU; Eukaryotic translation initiation factor 5 OS=Phaseolus vulgaris GN=EIF5 PE=2 SV=1}	{cit:102606845; K03262 EIF5 translation initiation factor 5 - ko03013; Genetic Information Processing; Translation; RNA transport | ko04214; Cellular Processes; Cell growth and death; Apoptosis - fly}	{At1g77840; KOG2767 Translation initiation factor 5 (eIF-5) J Translation, ribosomal structure and biogenesis ;}	{GO:0003743; translation initiation factor activity; molecular_function GO:0005515; protein binding; molecular_function GO:0006413; translational initiation; biological_process}	{XM_011036844.1; PREDICTED: Populus euphratica eukaryotic translation initiation factor 5-like (LOC105133045), mRNA}	{PF01873:Domain found in IF2B/IF5 PF02020:eIF4-gamma/eIF5/eIF2-epsilon}
transcript_HQ_HBZL_transcript10228/f5p0/2037	2037	203	41.69	8.95	1.54	4.52	5.88	1.14	0.26	0.05	0.14	{XP_008234511.1; PREDICTED: uncharacterized protein LOC103333464 [Prunus mume]}	{sp|A1T0C5|RS5_PSYIN; 30S ribosomal protein S5 OS=Psychromonas ingrahamii (strain 37) GN=rpsE PE=3 SV=1}	{cic:CICLE_v10031158mg; K02988 RP-S5, MRPS5, rpsE small subunit ribosomal protein S5 - ko03010; Genetic Information Processing; Translation; Ribosome}	{At1g64880; KOG2646 Ribosomal protein S5 J Translation, ribosomal structure and biogenesis ;}	{GO:0003735; structural constituent of ribosome; molecular_function GO:0006412; translation; biological_process GO:0006355; regulation of transcription, DNA-dependent; biological_process GO:0005840; ribosome; cellular_component GO:0030269; tetrahydromethanopterin S-methyltransferase activity; molecular_function GO:0051015; actin filament binding; molecular_function GO:0015948; methanogenesis; bio…	{XM_006484642.2; PREDICTED: Citrus sinensis uncharacterized LOC102608648 (LOC102608648), mRNA}	{PF02865:STAT protein, protein interaction domain PF00333:Ribosomal protein S5, N-terminal domain PF03719:Ribosomal protein S5, C-terminal domain PF01044:Vinculin family PF04210:Tetrahydromethanopterin S-methyltransferase, subunit G }
transcript_HQ_HBZL_transcript10229/f2p0/2013	2013	88	144	106	130	129	2.58	4	3.11	4.3	3.91	{XP_010259143.1; PREDICTED: chaperone protein dnaJ 1, mitochondrial isoform X1 [Nelumbo nucifera]}	{sp|Q38813|DNAJ1_ARATH; Chaperone protein dnaJ 1, mitochondrial OS=Arabidopsis thaliana GN=ATJ1 PE=2 SV=2}	{nnu:104598665; - - - - -}	{At1g28210; KOG0715 Molecular chaperone (DnaJ superfamily) O Posttranslational modification, protein turnover, chaperones ;}	{GO:0031072; heat shock protein binding; molecular_function GO:0004674; protein serine/threonine kinase activity; molecular_function GO:0051082; unfolded protein binding; molecular_function}	{XM_010260843.2; PREDICTED: Nelumbo nucifera chaperone protein dnaJ 1, mitochondrial (LOC104598665), transcript variant X3, mRNA}	{PF08587:Ubiquitin associated domain (UBA) PF00684:DnaJ central domain}
transcript_HQ_HBZL_transcript1022/f6p0/3757	3757	2714	0	0	0	0	40.18	0	0	0	0	{XP_010257159.1; PREDICTED: leucine-rich repeat receptor-like tyrosine-protein kinase PXC3 [Nelumbo nucifera]}	{sp|O22938|PXC3_ARATH; Leucine-rich repeat receptor-like tyrosine-protein kinase PXC3 OS=Arabidopsis thaliana GN=PXC3 PE=2 SV=1}	{nnu:104597379; - - - - -}	{NA}	{GO:0005515; protein binding; molecular_function GO:0006468; protein phosphorylation; biological_process GO:0004672; protein kinase activity; molecular_function GO:0005524; ATP binding; molecular_function}	{XM_010258858.2; PREDICTED: Nelumbo nucifera leucine-rich repeat receptor-like tyrosine-protein kinase PXC3 (LOC104597379), transcript variant X2, mRNA}	{PF00069:Protein kinase domain PF13855:Leucine rich repeat PF13516:Leucine Rich repeat PF07714:Protein tyrosine kinase PF00560:Leucine Rich Repeat}
transcript_HQ_HBZL_transcript10231/f18p0/1976	1976	2857.94	0	0	0	0	85.64	0	0	0	0	{XP_008371002.1; PREDICTED: tonoplast dicarboxylate transporter [Malus domestica]}	{sp|Q8LG88|TDT_ARATH; Tonoplast dicarboxylate transporter OS=Arabidopsis thaliana GN=TDT PE=2 SV=2}	{pxb:103943766; K14445 SLC13A2_3_5 solute carrier family 13 (sodium-dependent dicarboxylate transporter), member 2/3/5 - -}	{At5g47560; KOG1281 Na+/dicarboxylate, Na+/tricarboxylate and phosphate transporters P Inorganic ion transport and metabolism ;}	{GO:0016020; membrane; cellular_component GO:0005215; NA GO:0006814; sodium ion transport; biological_process GO:0055085; transmembrane transport; biological_process GO:0016021; integral to membrane; cellular_component}	{XM_006449813.1; Citrus clementina hypothetical protein (CICLE_v10014770mg) mRNA, complete cds}	{PF00939:Sodium:sulfate symporter transmembrane region PF03600:Citrate transporter}
transcript_HQ_HBZL_transcript10232/f2p0/2013	2012	161	79	85	83	87	4.73	2.19	2.49	2.75	2.64	{XP_019078283.1; PREDICTED: 2-succinylbenzoate--CoA ligase, chloroplastic/peroxisomal isoform X1 [Vitis vinifera]}	{sp|Q8VYJ1|MENE_ARATH; 2-succinylbenzoate--CoA ligase, chloroplastic/peroxisomal OS=Arabidopsis thaliana GN=AAE14 PE=1 SV=1}	{vvi:100250731; K14760 AAE14 acyl-activating enzyme 14 6.2.1.26 ko00130; Metabolism; Metabolism of cofactors and vitamins; Ubiquinone and other terpenoid-quinone biosynthesis}	{At1g30520; KOG1177 Long chain fatty acid acyl-CoA ligase I Lipid transport and metabolism ;}	{GO:0003824; NA GO:0008152; NA}	{XM_019001217.1; PREDICTED: Juglans regia heavy metal-associated isoprenylated plant protein 21-like (LOC109019006), mRNA}	{PF00501:AMP-binding enzyme}
transcript_HQ_HBZL_transcript10233/f28p0/1817	1817	19506.4	12.39	0	0	0	643.31	0.39	0	0	0	{XP_003530990.1; PREDICTED: sugar carrier protein C-like [Glycine max]}	{sp|Q41144|STC_RICCO; Sugar carrier protein C OS=Ricinus communis GN=STC PE=2 SV=1}	{aip:107626234; - - - - -}	{At1g11260; KOG0254 Predicted transporter (major facilitator superfamily) R General function prediction only ;}	{GO:0003725; double-stranded RNA binding; molecular_function GO:0022857; transmembrane transporter activity; molecular_function GO:0006810; transport; biological_process GO:0016021; integral to membrane; cellular_component GO:0055085; transmembrane transport; biological_process}	{XM_009126303.2; PREDICTED: Brassica rapa sugar transport protein 9-like (LOC103849541), transcript variant X7, mRNA}	{PF06609:Fungal trichothecene efflux pump (TRI12) PF01005:Flavivirus non-structural protein NS2A PF00083:Sugar (and other) transporter PF07690:Major Facilitator Superfamily}
transcript_HQ_HBZL_transcript10235/f2p0/2018	2018	1219	0	2	0	0	35.67	0	0.06	0	0	{XP_010248663.1; PREDICTED: uncharacterized protein LOC104591508 [Nelumbo nucifera]}	{sp|Q02527|MGAT3_RAT; Beta-1,4-mannosyl-glycoprotein 4-beta-N-acetylglucosaminyltransferase OS=Rattus norvegicus GN=Mgat3 PE=1 SV=2}	{nnu:104591508; K00737 MGAT3 beta-1,4-mannosyl-glycoprotein beta-1,4-N-acetylglucosaminyltransferase 2.4.1.144 ko00510; Metabolism; Glycan biosynthesis and metabolism; N-Glycan biosynthesis}	{NA}	{GO:0003830; beta-1,4-mannosylglycoprotein 4-beta-N-acetylglucosaminyltransferase activity; molecular_function GO:0006487; protein N-linked glycosylation; biological_process GO:0016020; membrane; cellular_component}	{XM_006417105.1; Eutrema salsugineum hypothetical protein (EUTSA_v10007850mg) mRNA, complete cds}	{PF04724:Glycosyltransferase family 17}
transcript_HQ_HBZL_transcript10237/f4p0/2050	2050	1123.4	0	0	0	0	32.29	0	0	0	0	{XP_010261880.1; PREDICTED: uncharacterized protein LOC104600558 [Nelumbo nucifera]}	{sp|Q4VYC8|NSP1_MEDTR; Nodulation-signaling pathway 1 protein OS=Medicago truncatula GN=NSP1 PE=1 SV=1}	{vvi:100264608; - - - - -}	{At3g43850; KOG4210 Nuclear localization sequence binding protein K Transcription ;}	{NA}	{NA}	{NA}
transcript_HQ_HBZL_transcript10239/f2p0/2023	2023	264	0	0	0	0	7.7	0	0	0	0	{XP_010247085.1; PREDICTED: serine/threonine-protein kinase CDL1-like isoform X2 [Nelumbo nucifera]}	{sp|Q9LDZ5|PBL21_ARATH; Probable serine/threonine-protein kinase PBL21 OS=Arabidopsis thaliana GN=PBL21 PE=1 SV=1}	{pper:PRUPE_ppa027153mg; - - - - -}	{At1g20650_2; KOG1187 Serine/threonine protein kinase T Signal transduction mechanisms ;}	{GO:0004672; protein kinase activity; molecular_function GO:0006468; protein phosphorylation; biological_process GO:0005524; ATP binding; molecular_function}	{XM_018980878.1; PREDICTED: Juglans regia serine/threonine-protein kinase CDL1-like (LOC109002945), transcript variant X2, mRNA}	{PF00069:Protein kinase domain PF07714:Protein tyrosine kinase}
transcript_HQ_HBZL_transcript10242/f3p0/2028	2028	233	0	0	0.26	4.89	6.78	0	0	0.01	0.15	{XP_010261934.1; PREDICTED: E3 ubiquitin-protein ligase RBBP6-like isoform X2 [Nelumbo nucifera]}	{sp|P97868|RBBP6_MOUSE; E3 ubiquitin-protein ligase RBBP6 OS=Mus musculus GN=Rbbp6 PE=1 SV=5}	{cit:102613848; K10624 RBBP6 E3 ubiquitin-protein ligase RBBP6 2.3.2.27 -}	{7291741_1; KOG0314 Predicted E3 ubiquitin ligase O Posttranslational modification, protein turnover, chaperones ;}	{GO:0004842; ubiquitin-protein ligase activity; molecular_function GO:0046872; metal ion binding; molecular_function GO:0008270; zinc ion binding; molecular_function GO:0005634; nucleus; cellular_component GO:0005515; protein binding; molecular_function GO:0016567; protein ubiquitination; biological_process GO:0003723; RNA binding; molecular_function}	{XM_010263632.2; PREDICTED: Nelumbo nucifera E3 ubiquitin-protein ligase RBBP6-like (LOC104600591), transcript variant X2, mRNA}	{PF04564:U-box domain PF03854:P-11 zinc finger PF12678:RING-H2 zinc finger domain PF08783:DWNN domain PF13639:Ring finger domain PF14634:zinc-RING finger domain PF00097:Zinc finger, C3HC4 type (RING finger)}
transcript_HQ_HBZL_transcript10243/f2p0/2038	2038	740.08	0	0	0	0	21.41	0	0	0	0	{ALG05141.1; cytochrome P450 family 71 subfamily BE polypeptide 54 [Sinopodophyllum hexandrum]}	{sp|A6YIH8|C7D55_HYOMU; Premnaspirodiene oxygenase OS=Hyoscyamus muticus GN=CYP71D55 PE=1 SV=1}	{pmum:103344162; - - - - -}	{At3g26210; KOG0156 Cytochrome P450 CYP2 subfamily Q Secondary metabolites biosynthesis, transport and catabolism ;}	{GO:0055114; oxidation-reduction process; biological_process GO:0016705; oxidoreductase activity, acting on paired donors, with incorporation or reduction of molecular oxygen; molecular_function GO:0005506; iron ion binding; molecular_function GO:0020037; heme binding; molecular_function GO:0042138; meiotic DNA double-strand break formation; biological_process}	{NA}	{PF00067:Cytochrome P450 PF15091:Domain of unknown function (DUF4554)}
transcript_HQ_HBZL_transcript10247/f5p0/2014	2014	363	0	0	0	0	10.64	0	0	0	0	{XP_010270897.1; PREDICTED: F-box protein At1g47056-like [Nelumbo nucifera]}	{sp|Q9C626|FB37_ARATH; F-box protein At1g47056 OS=Arabidopsis thaliana GN=At1g47056 PE=2 SV=1}	{nnu:104607088; - - - - -}	{At1g47056; KOG1947 Leucine rich repeat proteins, some proteins contain F-box R General function prediction only ;}	{GO:0005515; protein binding; molecular_function}	{XM_012715339.1; PREDICTED: Cicer arietinum F-box protein At1g47056-like (LOC101492984), transcript variant X2, mRNA}	{PF12937:F-box-like PF13516:Leucine Rich repeat PF00646:F-box domain PF13855:Leucine rich repeat}
transcript_HQ_HBZL_transcript10248/f3p0/2033	2034	234.02	0	7.12	23.23	24.95	6.79	0	0.21	0.76	0.75	{XP_010240878.1; PREDICTED: zinc finger CCCH domain-containing protein 56 [Nelumbo nucifera]}	{sp|Q84UQ3|C3H56_ORYSJ; Zinc finger CCCH domain-containing protein 56 OS=Oryza sativa subsp. japonica GN=Os08g0159800 PE=4 SV=1}	{sind:105172545; - - - - -}	{At1g32360_1; KOG1677 CCCH-type Zn-finger protein R General function prediction only ;}	{GO:0015833; peptide transport; biological_process GO:0046872; metal ion binding; molecular_function GO:0005524; ATP binding; molecular_function GO:0000166; nucleotide binding; molecular_function}	{XM_008790444.2; PREDICTED: Phoenix dactylifera zinc finger CCCH domain-containing protein 56-like (LOC103706370), transcript variant X6, mRNA}	{PF00642:Zinc finger C-x8-C-x5-C-x3-H type (and similar) PF08352:Oligopeptide/dipeptide transporter, C-terminal region}
transcript_HQ_HBZL_transcript10249/f28p0/1994	1994	2322	0	0	0	0	68.86	0	0	0	0	{XP_010277870.1; PREDICTED: proline--tRNA ligase, cytoplasmic-like [Nelumbo nucifera]}	{sp|Q9M1R2|SYPC_ARATH; Proline--tRNA ligase, cytoplasmic OS=Arabidopsis thaliana GN=At3g62120 PE=1 SV=1}	{nnu:104593391; K01881 PARS, proS prolyl-tRNA synthetase 6.1.1.15 ko00970; Genetic Information Processing; Translation; Aminoacyl-tRNA biosynthesis}	{At3g62120; KOG4163 Prolyl-tRNA synthetase J Translation, ribosomal structure and biogenesis ;}	{GO:0006418; tRNA aminoacylation for protein translation; biological_process GO:0006433; prolyl-tRNA aminoacylation; biological_process GO:0005737; cytoplasm; cellular_component GO:0004812; aminoacyl-tRNA ligase activity; molecular_function GO:0000166; nucleotide binding; molecular_function GO:0004827; proline-tRNA ligase activity; molecular_function GO:0005524; ATP binding; molecular_function}	{XM_016035021.1; PREDICTED: Ziziphus jujuba proline--tRNA ligase, cytoplasmic-like (LOC107424792), transcript variant X6, mRNA}	{PF00587:tRNA synthetase class II core domain (G, H, P, S and T) PF09180:Prolyl-tRNA synthetase, C-terminal}
transcript_HQ_HBZL_transcript10250/f2p0/2019	2020	376.67	0	54.16	71.32	21.26	11.01	0	1.58	2.35	0.64	{GAV86006.1; MFS_2 domain-containing protein [Cephalotus follicularis]}	{sp|Q6NUT3|MFS12_HUMAN; Major facilitator superfamily domain-containing protein 12 OS=Homo sapiens GN=MFSD12 PE=1 SV=2}	{sly:101246177; - - - - -}	{At3g60070; KOG4830 Predicted sugar transporter G Carbohydrate transport and metabolism ;}	{GO:0055085; transmembrane transport; biological_process GO:0016021; integral to membrane; cellular_component}	{XM_018126194.1; PREDICTED: Theobroma cacao major facilitator superfamily domain-containing protein 12 (LOC18593054), transcript variant X3, mRNA}	{PF07690:Major Facilitator Superfamily}
transcript_HQ_HBZL_transcript10251/f2p0/2025	2025	1.21	0	0	4.67	0	0.04	0	0	0.15	0	{NP_001238194.1; uncharacterized protein LOC100306140 [Glycine max]}	{sp|A4QJX6|RR7_OLIPU; 30S ribosomal protein S7, chloroplastic OS=Olimarabidopsis pumila GN=rps7-A PE=3 SV=1}	{eus:EUTSA_v10011843mg; K02992 RP-S7, MRPS7, rpsG small subunit ribosomal protein S7 - ko03010; Genetic Information Processing; Translation; Ribosome}	{AtCh068; KOG3291 Ribosomal protein S7 J Translation, ribosomal structure and biogenesis ;}	{GO:0006351; transcription, DNA-dependent; biological_process GO:0046983; protein dimerization activity; molecular_function}	{XM_016863868.1; PREDICTED: Gossypium hirsutum 30S ribosomal protein S7, chloroplastic (LOC107931912), mRNA}	{PF13656:RNA polymerase Rpb3/Rpb11 dimerisation domain}
transcript_HQ_HBZL_transcript10252/f2p0/2023	2023	133.4	0	0	0	9.3	3.89	0	0	0	0.28	{KZV43119.1; hypothetical protein F511_04511 [Dorcoceras hygrometricum]}	{sp|A2RVS6|SR34A_ARATH; Serine/arginine-rich splicing factor SR34A OS=Arabidopsis thaliana GN=SR34A PE=2 SV=1}	{spen:107014841; K12890 SFRS1, ASF, SF2 splicing factor, arginine/serine-rich 1 - ko03040; Genetic Information Processing; Transcription; Spliceosome | ko04657; Organismal Systems; Immune system; IL-17 signaling pathway | ko05168; Human Diseases; Infectious diseases: Viral; Herpes simplex infection; spen:107014841; K12890 SFRS1, ASF, SF2 splicing factor, arginine/serine-rich 1 - ko03040; Genetic …	{At1g09140; KOG0105 Alternative splicing factor ASF/SF2 (RRM superfamily) A RNA processing and modification ;}	{GO:0006397; mRNA processing; biological_process GO:0003723; RNA binding; molecular_function GO:0046660; female sex differentiation; biological_process GO:0005634; nucleus; cellular_component GO:0003676; nucleic acid binding; molecular_function}	{XM_019226265.1; PREDICTED: Vitis vinifera serine/arginine-rich splicing factor SR34A (LOC100853709), transcript variant X6, mRNA}	{PF08777:RNA binding motif PF06495:Fruit fly transformer protein PF16367:RNA recognition motif PF00076:RNA recognition motif. (a.k.a. RRM, RBD, or RNP domain)}
transcript_HQ_HBZL_transcript10254/f6p0/2031	2031	2947	0	0	0	0	85.6	0	0	0	0	{GAV57586.1; Pkinase_Tyr domain-containing protein [Cephalotus follicularis]}	{sp|Q2MHE4|HT1_ARATH; Serine/threonine-protein kinase HT1 OS=Arabidopsis thaliana GN=HT1 PE=1 SV=1}	{nnu:104598642; - - - - -}	{At3g22750; KOG0192 Tyrosine kinase specific for activated (GTP-bound) p21cdc42Hs T Signal transduction mechanisms ;}	{GO:0005524; ATP binding; molecular_function GO:0006468; protein phosphorylation; biological_process GO:0004672; protein kinase activity; molecular_function}	{XM_002312507.2; Populus trichocarpa hypothetical protein (POPTR_0008s15580g) mRNA, complete cds}	{PF07714:Protein tyrosine kinase PF00069:Protein kinase domain}
transcript_HQ_HBZL_transcript10256/f17p0/2020	2020	1261.47	0	0	0	0	36.87	0	0	0	0	{XP_008338616.1; PREDICTED: splicing factor U2af large subunit A-like isoform X2 [Malus domestica]}	{sp|Q9ZR40|U2A2B_NICPL; Splicing factor U2af large subunit B OS=Nicotiana plumbaginifolia GN=U2AF65B PE=2 SV=1}	{pxb:103947491; K12837 U2AF2 splicing factor U2AF 65 kDa subunit - ko03040; Genetic Information Processing; Transcription; Spliceosome}	{At1g60900; KOG0120 Splicing factor U2AF, large subunit (RRM superfamily) A RNA processing and modification ;}	{GO:0005886; plasma membrane; cellular_component GO:0016021; integral to membrane; cellular_component GO:0003676; nucleic acid binding; molecular_function}	{XM_010256607.2; PREDICTED: Nelumbo nucifera splicing factor U2af large subunit B (LOC104595741), transcript variant X1, mRNA}	{PF00076:RNA recognition motif. (a.k.a. RRM, RBD, or RNP domain) PF10099:Anti-sigma-K factor rskA PF16367:RNA recognition motif}
transcript_HQ_HBZL_transcript10259/f5p0/2012	2012	987.89	5.91	4.97	7	0	29	0.16	0.15	0.23	0	{KHN38727.1; High affinity nitrate transporter 2.4 [Glycine soja]}	{sp|Q9FJH8|NRT24_ARATH; High affinity nitrate transporter 2.4 OS=Arabidopsis thaliana GN=NRT2.4 PE=2 SV=1}	{pmum:103325807; K02575 NRT, narK, nrtP, nasA MFS transporter, NNP family, nitrate/nitrite transporter - ko00910; Metabolism; Energy metabolism; Nitrogen metabolism}	{NA}	{GO:0016021; integral to membrane; cellular_component GO:0055085; transmembrane transport; biological_process}	{XM_012209353.1; PREDICTED: Jatropha curcas high-affinity nitrate transporter 2.1-like (LOC105628043), mRNA}	{PF07690:Major Facilitator Superfamily}
transcript_HQ_HBZL_transcript10260/f7p0/2014	2014	3845.7	0	0	0	0	112.77	0	0	0	0	{AJD20226.1; putative N-methylcoclaurine 3-hydroxylase [Podophyllum peltatum]}	{sp|P37122|C76A2_SOLME; Cytochrome P450 76A2 OS=Solanum melongena GN=CYP76A2 PE=2 SV=1}	{rcu:8274889; K20618 CYP76A cytochrome P450 family 76 subfamily A - -}	{At3g52970; KOG0156 Cytochrome P450 CYP2 subfamily Q Secondary metabolites biosynthesis, transport and catabolism ;}	{GO:0016705; oxidoreductase activity, acting on paired donors, with incorporation or reduction of molecular oxygen; molecular_function GO:0055114; oxidation-reduction process; biological_process GO:0005506; iron ion binding; molecular_function GO:0020037; heme binding; molecular_function}	{NA}	{PF00067:Cytochrome P450}
transcript_HQ_HBZL_transcript10264/f2p0/2011	2011	765	0	127.98	317.95	383.28	22.47	0	3.76	10.52	11.62	{XP_010251124.1; PREDICTED: AP-1 complex subunit mu-2 [Nelumbo nucifera]}	{sp|O22715|AP1M2_ARATH; AP-1 complex subunit mu-2 OS=Arabidopsis thaliana GN=AP1M2 PE=1 SV=1}	{nnu:104593121; K12393 AP1M AP-1 complex subunit mu - ko04142; Cellular Processes; Transport and catabolism; Lysosome}	{At1g60780; KOG0937 Adaptor complexes medium subunit family U Intracellular trafficking, secretion, and vesicular transport ;}	{NA}	{XM_010252822.2; PREDICTED: Nelumbo nucifera AP-1 complex subunit mu-2 (LOC104593121), mRNA}	{NA}
transcript_HQ_HBZL_transcript10265/f4p0/2014	2014	1382.06	0	0	0	0	40.53	0	0	0	0	{XP_018821919.1; PREDICTED: uncharacterized protein LOC108991943 [Juglans regia]}	{NA}	{jcu:105646325; - - - - -}	{At1g80280; KOG1454 Predicted hydrolase/acyltransferase (alpha/beta hydrolase superfamily) R General function prediction only ;}	{NA}	{LT594797.1; Theobroma cacao genome assembly, chromosome: X}	{NA}
transcript_HQ_HBZL_transcript10266/f5p0/2029	2029	531	6	15.52	45.88	24.89	15.44	0.17	0.45	1.5	0.75	{KJB35344.1; hypothetical protein B456_006G110100 [Gossypium raimondii]}	{sp|Q9ZUX7|IPT2_ARATH; tRNA dimethylallyltransferase 2 OS=Arabidopsis thaliana GN=IPT2 PE=1 SV=2}	{nnu:104599687; K00791 miaA, TRIT1 tRNA dimethylallyltransferase 2.5.1.75 ko00908; Metabolism; Metabolism of terpenoids and polyketides; Zeatin biosynthesis}	{At2g27760; KOG1384 tRNA delta(2)-isopentenylpyrophosphate transferase J Translation, ribosomal structure and biogenesis ;}	{GO:0008033; tRNA processing; biological_process GO:0016301; kinase activity; molecular_function GO:0003924; GTPase activity; molecular_function GO:0008033; tRNA processing; biological_process GO:0005524; ATP binding; molecular_function GO:0009058; biosynthetic process; biological_process GO:0005525; GTP binding; molecular_function GO:0004161; dimethylallyltranstransferase activity; molecular_fun…	{NA}	{PF01715:IPP transferase PF06414:Zeta toxin PF01745:Isopentenyl transferase PF03193:Protein of unknown function, DUF258 PF01695:IstB-like ATP binding protein PF01715:IPP transferase}
transcript_HQ_HBZL_transcript10269/f5p0/2024	2026	698	0	27.07	45.55	53.97	20.33	0	0.79	1.49	1.62	{XP_010271630.1; PREDICTED: rho GTPase-activating protein 5-like [Nelumbo nucifera]}	{sp|Q9FMR1|RGAP1_ARATH; Rho GTPase-activating protein 1 OS=Arabidopsis thaliana GN=ROPGAP1 PE=2 SV=1}	{nnu:104588974; - - - - -}	{At5g22400; KOG4270 GTPase-activator protein T Signal transduction mechanisms ;}	{GO:0007165; signal transduction; biological_process}	{XM_010273328.2; PREDICTED: Nelumbo nucifera rho GTPase-activating protein 5-like (LOC104607650), mRNA}	{PF00620:RhoGAP domain}
transcript_HQ_HBZL_transcript1026/f2p0/3745	3745	1600.24	0	0	0	0	23.77	0	0	0	0	{XP_010272588.1; PREDICTED: phospholipase D gamma 1-like [Nelumbo nucifera]}	{sp|P93733|PLDB1_ARATH; Phospholipase D beta 1 OS=Arabidopsis thaliana GN=PLDBETA1 PE=1 SV=4}	{ini:109184083; K01115 PLD1_2 phospholipase D1/2 3.1.4.4 ko00564; Metabolism; Lipid metabolism; Glycerophospholipid metabolism | ko00565; Metabolism; Lipid metabolism; Ether lipid metabolism | ko04014; Environmental Information Processing; Signal transduction; Ras signaling pathway | ko04072; Environmental Information Processing; Signal transduction; Phospholipase D signaling pathway | ko04071; E…	{At2g42010; KOG1329 Phospholipase D1 I Lipid transport and metabolism ;}	{GO:0003824; NA GO:0005515; protein binding; molecular_function}	{XM_010274286.2; PREDICTED: Nelumbo nucifera phospholipase D gamma 1-like (LOC104608337), mRNA}	{PF00168:C2 domain PF00614:Phospholipase D Active site motif}
transcript_HQ_HBZL_transcript10270/f6p0/2015	2015	275	0	0	0	0	8.06	0	0	0	0	{XP_010262322.1; PREDICTED: mitochondrial import inner membrane translocase subunit TIM44-2 [Nelumbo nucifera]}	{sp|Q5XF06|TI442_ARATH; Mitochondrial import inner membrane translocase subunit TIM44-2 OS=Arabidopsis thaliana GN=TIM44-2 PE=1 SV=1}	{pper:PRUPE_ppa004998mg; K17804 TIM44 mitochondrial import inner membrane translocase subunit TIM44 - -}	{At2g20510; KOG2580 Mitochondrial import inner membrane translocase, subunit TIM44 U Intracellular trafficking, secretion, and vesicular transport ;}	{GO:0090529; NA GO:0005577; fibrinogen complex; cellular_component GO:0005737; cytoplasm; cellular_component GO:0008289; lipid binding; molecular_function GO:0030168; platelet activation; biological_process GO:0005576; NA GO:0043093; cytokinesis by binary fission; biological_process GO:0006869; lipid transport; biological_process GO:0030674; protein binding, bridging; molecular_function GO:004215…	{NA}	{PF01442:Apolipoprotein A1/A4/E domain PF06005:Protein of unknown function (DUF904) PF07743:HSCB C-terminal oligomerisation domain PF08702:Fibrinogen alpha/beta chain family PF07464:Apolipophorin-III precursor (apoLp-III)}
transcript_HQ_HBZL_transcript10273/f2p0/2016	2015	1329.79	0	1	0	0.99	38.97	0	0.03	0	0.03	{XP_010251797.1; PREDICTED: alpha-L-arabinofuranosidase 1-like [Nelumbo nucifera]}	{sp|Q9SG80|ASD1_ARATH; Alpha-L-arabinofuranosidase 1 OS=Arabidopsis thaliana GN=ASD1 PE=1 SV=1}	{nnu:104593587; K01209 abfA alpha-N-arabinofuranosidase 3.2.1.55 ko00520; Metabolism; Carbohydrate metabolism; Amino sugar and nucleotide sugar metabolism}	{NA}	{GO:0046556; alpha-N-arabinofuranosidase activity; molecular_function GO:0046373; L-arabinose metabolic process; biological_process GO:0016798; hydrolase activity, acting on glycosyl bonds; molecular_function}	{XM_018121685.1; PREDICTED: Theobroma cacao alpha-L-arabinofuranosidase 1 (LOC18598711), mRNA}	{PF02018:Carbohydrate binding domain PF06964:Alpha-L-arabinofuranosidase C-terminal domain}
transcript_HQ_HBZL_transcript10275/f2p0/2049	2049	324.95	0	0	0	0	9.34	0	0	0	0	{XP_003635452.2; PREDICTED: probable amino-acid acetyltransferase NAGS1, chloroplastic isoform X1 [Vitis vinifera]}	{sp|B5X4Z4|NAGS2_ARATH; Probable amino-acid acetyltransferase NAGS2, chloroplastic OS=Arabidopsis thaliana GN=NAGS2 PE=2 SV=1}	{vvi:100259394; K14682 argAB amino-acid N-acetyltransferase 2.3.1.1 ko01210; Metabolism; Global and overview maps; 2-Oxocarboxylic acid metabolism | ko01230; Metabolism; Global and overview maps; Biosynthesis of amino acids | ko00220; Metabolism; Amino acid metabolism; Arginine biosynthesis}	{At2g22910; KOG2436 Acetylglutamate kinase/acetylglutamate synthase E Amino acid transport and metabolism ;}	{GO:0016747; transferase activity, transferring acyl groups other than amino-acyl groups; molecular_function GO:0008080; N-acetyltransferase activity; molecular_function}	{XM_008787228.1; PREDICTED: Phoenix dactylifera probable amino-acid acetyltransferase NAGS1, chloroplastic (LOC103704078), mRNA}	{PF08445:FR47-like protein PF13673:Acetyltransferase (GNAT) domain PF00583:Acetyltransferase (GNAT) family PF13508:Acetyltransferase (GNAT) domain}
transcript_HQ_HBZL_transcript10277/f2p0/2018	2018	55	0	0	0	0	1.61	0	0	0	0	{XP_015888210.1; PREDICTED: heat shock 70 kDa protein 8 [Ziziphus jujuba]}	{sp|Q9SKY8|HSP7H_ARATH; Heat shock 70 kDa protein 8 OS=Arabidopsis thaliana GN=HSP70-8 PE=1 SV=1}	{jcu:105631975; K09489 HSPA4 heat shock 70kDa protein 4 - ko04530; Cellular Processes; Cellular community - eukaryotes; Tight junction | ko04612; Organismal Systems; Immune system; Antigen processing and presentation}	{At2g32120; KOG0101 Molecular chaperones HSP70/HSC70, HSP70 superfamily O Posttranslational modification, protein turnover, chaperones ;}	{NA}	{XM_018119167.1; PREDICTED: Theobroma cacao heat shock 70 kDa protein 8 (LOC18602975), transcript variant X2, mRNA}	{NA}
transcript_HQ_HBZL_transcript10278/f4p0/2019	2019	827	192.28	0	0	0	24.18	5.32	0	0	0	{ALB35157.1; basic helix-loop-helix 144-like protein transcript variant 1 [Morus alba]}	{sp|Q9ASX9|BH144_ARATH; Transcription factor bHLH144 OS=Arabidopsis thaliana GN=BHLH144 PE=1 SV=1}	{nnu:104610514; - - - - -}	{NA}	{GO:0046983; protein dimerization activity; molecular_function}	{NA}	{PF00010:Helix-loop-helix DNA-binding domain}
transcript_HQ_HBZL_transcript10279/f4p0/2017	2017	592	0	69.15	150.85	180.71	17.33	0	2.02	4.98	5.46	{XP_009357043.1; PREDICTED: T-complex protein 1 subunit zeta 1 [Pyrus x bretschneideri]}	{sp|Q9M888|TCPZA_ARATH; T-complex protein 1 subunit zeta 1 OS=Arabidopsis thaliana GN=CCT6A PE=1 SV=1}	{pxb:103947807; K09498 CCT6 T-complex protein 1 subunit zeta - -}	{At3g02530; KOG0359 Chaperonin complex component, TCP-1 zeta subunit (CCT6) O Posttranslational modification, protein turnover, chaperones ;}	{GO:0005524; ATP binding; molecular_function}	{XM_010266900.2; PREDICTED: Nelumbo nucifera T-complex protein 1 subunit zeta 1 (LOC104603006), mRNA}	{PF00118:TCP-1/cpn60 chaperonin family}
transcript_HQ_HBZL_transcript10280/f3p0/2074	2074	175.77	1.36	1	10.63	9.21	4.99	0.04	0.03	0.34	0.27	{XP_010260772.1; PREDICTED: ATPase WRNIP1 [Nelumbo nucifera]}	{sp|Q8CG07|WRIP1_RAT; ATPase WRNIP1 OS=Rattus norvegicus GN=Wrnip1 PE=1 SV=1}	{nnu:104599770; K07478 ycaJ putative ATPase - -}	{At1g24290; KOG2028 ATPase related to the helicase subunit of the Holliday junction resolvase L Replication, recombination and repair ;}	{GO:0043531; ADP binding; molecular_function GO:0006355; regulation of transcription, DNA-dependent; biological_process GO:0005525; GTP binding; molecular_function GO:0016887; ATPase activity; molecular_function GO:0005524; ATP binding; molecular_function GO:0008134; transcription factor binding; molecular_function GO:0003678; DNA helicase activity; molecular_function GO:0003723; RNA binding; mol…	{XM_012235851.1; PREDICTED: Jatropha curcas ATPase WRNIP1 (LOC105649259), mRNA}	{PF07726:ATPase family associated with various cellular activities (AAA) PF00910:RNA helicase PF04851:Type III restriction enzyme, res subunit PF01695:IstB-like ATP binding protein PF00158:Sigma-54 interaction domain PF05496:Holliday junction DNA helicase ruvB N-terminus PF01637:ATPase domain predominantly from Archaea PF07724:AAA domain (Cdc48 subfamily) PF07728:AAA domain (dynein-related subfam…
transcript_HQ_HBZL_transcript10281/f2p0/2019	2019	286	225.49	140.21	82.3	150.08	8.36	6.24	4.1	2.71	4.53	{NP_001312050.1; apyrase 2-like [Nicotiana tabacum]}	{sp|Q9SPM5|APY2_ARATH; Apyrase 2 OS=Arabidopsis thaliana GN=APY2 PE=1 SV=1}	{cam:101498578; K14641 APY1_2 apyrase 3.6.1.5 ko00230; Metabolism; Nucleotide metabolism; Purine metabolism | ko00240; Metabolism; Nucleotide metabolism; Pyrimidine metabolism}	{At5g18280; KOG1385 Nucleoside phosphatase F Nucleotide transport and metabolism ;}	{GO:0016787; hydrolase activity; molecular_function}	{XM_012237320.1; PREDICTED: Jatropha curcas apyrase 2 (LOC105650422), mRNA}	{PF01150:GDA1/CD39 (nucleoside phosphatase) family}
transcript_HQ_HBZL_transcript10282/f2p0/2026	2026	0	0	0	0	0	0	0	0	0	0	{AAA53173.1; similar to S. cerevisiae PTR2 gene, GenBank Accession Number L11994 [Arabidopsis thaliana]}	{sp|Q9P380|PTR2_SCHPO; Probable peptide transporter ptr2 OS=Schizosaccharomyces pombe (strain 972 / ATCC 24843) GN=ptr2 PE=1 SV=1}	{csl:COCSUDRAFT_19259; K14638 SLC15A3_4, PHT solute carrier family 15 (peptide/histidine transporter), member 3/4 - -}	{SPBC13A2.04c; KOG1237 H+/oligopeptide symporter E Amino acid transport and metabolism ;}	{GO:0006810; transport; biological_process GO:0016020; membrane; cellular_component GO:0005215; NA}	{NA}	{PF00854:POT family}
transcript_HQ_HBZL_transcript10285/f30p0/1932	1932	1491.6	0	40.78	75.74	97.31	45.85	0	1.25	2.62	3.09	{XP_010278369.1; PREDICTED: probable ADP-ribosylation factor GTPase-activating protein AGD5 [Nelumbo nucifera]}	{sp|Q9FL69|AGD5_ARATH; Probable ADP-ribosylation factor GTPase-activating protein AGD5 OS=Arabidopsis thaliana GN=AGD5 PE=1 SV=1}	{jcu:105632810; K12486 SMAP stromal membrane-associated protein - ko04144; Cellular Processes; Transport and catabolism; Endocytosis}	{At5g54310; KOG0703 Predicted GTPase-activating protein T Signal transduction mechanisms ;}	{GO:0005096; GTPase activator activity; molecular_function}	{XM_004150050.2; PREDICTED: Cucumis sativus probable ADP-ribosylation factor GTPase-activating protein AGD5 (LOC101214277), mRNA}	{PF01412:Putative GTPase activating protein for Arf}
transcript_HQ_HBZL_transcript10289/f2p0/2025	2025	929	0	0	0	0	27.07	0	0	0	0	{XP_006436725.1; hypothetical protein CICLE_v10031568mg [Citrus clementina]}	{sp|O23140|AP2M_ARATH; AP-2 complex subunit mu OS=Arabidopsis thaliana GN=AP2M PE=1 SV=1}	{pop:POPTR_0003s08940g; K11826 AP2M1 AP-2 complex subunit mu-1 - ko04144; Cellular Processes; Transport and catabolism; Endocytosis | ko04961; Organismal Systems; Excretory system; Endocrine and other factor-regulated calcium reabsorption | ko04721; Organismal Systems; Nervous system; Synaptic vesicle cycle | ko05016; Human Diseases; Neurodegenerative diseases; Huntington's disease}	{At5g46630; KOG0938 Adaptor complexes medium subunit family U Intracellular trafficking, secretion, and vesicular transport ;}	{NA}	{XM_010276947.2; PREDICTED: Nelumbo nucifera AP-2 complex subunit mu (LOC104610374), mRNA}	{NA}
transcript_HQ_HBZL_transcript1028/f2p0/3763	3764	926.76	0	0	0	3	13.69	0	0	0	0.05	{XP_010660130.1; PREDICTED: myosin-binding protein 1 isoform X1 [Vitis vinifera]}	{sp|F4HXQ7|MYOB1_ARATH; Myosin-binding protein 1 OS=Arabidopsis thaliana GN=MYOB1 PE=1 SV=1}	{egu:105053151; - - - - -}	{NA}	{GO:0008855; exodeoxyribonuclease VII activity; molecular_function GO:0071203; WASH complex; cellular_component GO:0007049; cell cycle; biological_process}	{XM_006604793.2; PREDICTED: Glycine max myosin-binding protein 1-like (LOC100809307), transcript variant X6, mRNA}	{PF04977:Septum formation initiator PF10152:Predicted coiled-coil domain-containing protein (DUF2360) PF02601:Exonuclease VII, large subunit}
transcript_HQ_HBZL_transcript10291/f3p0/2006	2005	71.35	0	0	0	0	2.1	0	0	0	0	{XP_010272778.1; PREDICTED: F-box/LRR-repeat protein At4g14103-like isoform X1 [Nelumbo nucifera]}	{sp|Q9FNI8|FBD32_ARATH; FBD-associated F-box protein At5g22730 OS=Arabidopsis thaliana GN=At5g22730 PE=2 SV=2}	{fve:101292189; - - - - -}	{NA}	{GO:0005515; protein binding; molecular_function}	{NA}	{PF00646:F-box domain PF12937:F-box-like}
transcript_HQ_HBZL_transcript10292/f2p0/1982	1981	36	0	0	3	5	1.08	0	0	0.1	0.15	{NA}	{NA}	{NA}	{NA}	{NA}	{AC253880.1; Aquilegia coerulea clone COL05-D05, complete sequence}	{NA}
transcript_HQ_HBZL_transcript10294/f3p0/2019	2019	1007	0	0	0	0	29.45	0	0	0	0	{XP_010267415.1; PREDICTED: protein GPR107-like [Nelumbo nucifera]}	{sp|Q8BUV8|GP107_MOUSE; Protein GPR107 OS=Mus musculus GN=Gpr107 PE=1 SV=2}	{nnu:104593652; - - - - -}	{At5g42090; KOG2569 G protein-coupled seven transmembrane receptor T Signal transduction mechanisms ;}	{GO:0019236; response to pheromone; biological_process GO:0007186; G-protein coupled receptor protein signaling pathway; biological_process GO:0016021; integral to membrane; cellular_component}	{XM_010269113.2; PREDICTED: Nelumbo nucifera protein GPR107-like (LOC104604667), mRNA}	{PF10192:Rhodopsin-like GPCR transmembrane domain PF06814:Lung seven transmembrane receptor}
transcript_HQ_HBZL_transcript10295/f2p0/2020	2020	179.28	4.02	6.02	0	0	5.24	0.11	0.18	0	0	{XP_008781568.1; PREDICTED: nifU-like protein 2, chloroplastic [Phoenix dactylifera]}	{sp|Q93W20|NIFU2_ARATH; NifU-like protein 2, chloroplastic OS=Arabidopsis thaliana GN=NIFU2 PE=1 SV=1}	{pda:103701324; - - - - -}	{At5g49940_1; KOG2358 NifU-like domain-containing proteins O Posttranslational modification, protein turnover, chaperones ;}	{GO:0016226; iron-sulfur cluster assembly; biological_process GO:0051536; iron-sulfur cluster binding; molecular_function GO:0005506; iron ion binding; molecular_function}	{NA}	{PF01106:NifU-like domain}
transcript_HQ_HBZL_transcript10296/f3p0/2011	2011	71.51	0	0	0	0	2.1	0	0	0	0	{XP_010264716.1; PREDICTED: zinc finger protein JACKDAW [Nelumbo nucifera]}	{sp|Q700D2|IDD10_ARATH; Zinc finger protein JACKDAW OS=Arabidopsis thaliana GN=JKD PE=1 SV=1}	{nnu:104594822; - - - - -}	{At5g03150; KOG1721 FOG: Zn-finger R General function prediction only ;}	{GO:0006886; intracellular protein transport; biological_process GO:0030127; COPII vesicle coat; cellular_component GO:0008270; zinc ion binding; molecular_function GO:0046872; metal ion binding; molecular_function GO:0006888; ER to Golgi vesicle-mediated transport; biological_process}	{XM_010685812.2; PREDICTED: Beta vulgaris subsp. vulgaris zinc finger protein JACKDAW (LOC104898708), mRNA}	{PF00096:Zinc finger, C2H2 type PF04810:Sec23/Sec24 zinc finger PF13465:Zinc-finger double domain}
transcript_HQ_HBZL_transcript10297/f3p0/2016	2016	636	56.71	66.6	64.3	79.63	18.63	1.57	1.95	2.12	2.41	{XP_010268690.1; PREDICTED: putative ER lumen protein-retaining receptor C28H8.4 [Nelumbo nucifera]}	{sp|Q09473|ERD22_CAEEL; Putative ER lumen protein-retaining receptor C28H8.4 OS=Caenorhabditis elegans GN=C28H8.4 PE=3 SV=1}	{nnu:104605274; - - - - -}	{At1g75760; KOG3106 ER lumen protein retaining receptor U Intracellular trafficking, secretion, and vesicular transport ;}	{GO:0009401; phosphoenolpyruvate-dependent sugar phosphotransferase system; biological_process GO:0006621; protein retention in ER lumen; biological_process GO:0016021; integral to membrane; cellular_component GO:0046923; ER retention sequence binding; molecular_function}	{XM_010270388.2; PREDICTED: Nelumbo nucifera putative ER lumen protein-retaining receptor C28H8.4 (LOC104605568), mRNA}	{PF03609:PTS system sorbose-specific iic component PF00810:ER lumen protein retaining receptor}
transcript_HQ_HBZL_transcript10299/f4p0/2034	2034	751.01	0	6.86	7.15	3.78	21.78	0	0.2	0.23	0.11	{XP_002277837.1; PREDICTED: lysophospholipid acyltransferase LPEAT2 isoform X2 [Vitis vinifera]}	{sp|Q8S8S2|LPCT2_ARATH; Lysophospholipid acyltransferase LPEAT2 OS=Arabidopsis thaliana GN=LPEAT2 PE=1 SV=1}	{nnu:104596217; K13510 LPCAT1_2 lysophosphatidylcholine acyltransferase / lyso-PAF acetyltransferase [EC:2.3.1.23 2.3.1.67] 2.3.1.23,2.3.1.67 ko00564; Metabolism; Lipid metabolism; Glycerophospholipid metabolism | ko00565; Metabolism; Lipid metabolism; Ether lipid metabolism}	{At2g45670; KOG2898 Predicted phosphate acyltransferase, contains PlsC domain I Lipid transport and metabolism ;}	{GO:0016746; transferase activity, transferring acyl groups; molecular_function GO:0005515; protein binding; molecular_function GO:0005509; calcium ion binding; molecular_function GO:0008152; NA}	{XM_010274298.2; PREDICTED: Nelumbo nucifera lysophospholipid acyltransferase LPEAT2-like (LOC104608343), mRNA}	{PF00036:EF hand PF01553:Acyltransferase PF12763:Cytoskeletal-regulatory complex EF hand PF13202:EF hand PF13405:EF-hand domain PF13833:EF-hand domain pair PF13499:EF-hand domain pair}
transcript_HQ_HBZL_transcript1029/f2p0/3796	3792	199.22	2.77	5.54	10.94	8.07	2.92	0.04	0.08	0.18	0.12	{XP_002276394.1; PREDICTED: 6-phosphofructo-2-kinase/fructose-2,6-bisphosphatase [Vitis vinifera]}	{sp|Q9MB58|F26_ARATH; 6-phosphofructo-2-kinase/fructose-2,6-bisphosphatase OS=Arabidopsis thaliana GN=FKFBP PE=1 SV=1}	{gra:105789005; K01103 PFKFB3 6-phosphofructo-2-kinase / fructose-2,6-biphosphatase 3&#160 2.7.1.105,3.1.3.46 ko00051; Metabolism; Carbohydrate metabolism; Fructose and mannose metabolism | ko04066; Environmental Information Processing; Signal transduction; HIF-1 signaling pathway | ko04152; Environmental Information Processing; Signal transduction; AMPK signaling pathway}	{At1g07110; KOG0234 Fructose-6-phosphate 2-kinase/fructose-2,6-biphosphatase G Carbohydrate transport and metabolism ;}	{GO:0006000; fructose metabolic process; biological_process GO:2001070; NA GO:0003873; 6-phosphofructo-2-kinase activity; molecular_function GO:0005524; ATP binding; molecular_function}	{XM_002276358.4; PREDICTED: Vitis vinifera 6-phosphofructo-2-kinase/fructose-2,6-bisphosphatase (LOC100244966), transcript variant X1, mRNA}	{PF00686:Starch binding domain PF01591:6-phosphofructo-2-kinase}
transcript_HQ_HBZL_transcript102/f4p0/5874	5874	2384	759.95	171.1	0	0	22.04	6.65	1.58	0	0	{XP_010260331.1; PREDICTED: homeobox-DDT domain protein RLT2 isoform X2 [Nelumbo nucifera]}	{sp|F4HY56|RLT1_ARATH; Homeobox-DDT domain protein RLT1 OS=Arabidopsis thaliana GN=RLT1 PE=1 SV=1}	{nnu:104599474; - - - - -}	{NA}	{GO:0003677; DNA binding; molecular_function GO:0006351; transcription, DNA-dependent; biological_process GO:0006355; regulation of transcription, DNA-dependent; biological_process}	{XM_012232823.1; PREDICTED: Jatropha curcas uncharacterized LOC105646886 (LOC105646886), transcript variant X3, mRNA}	{PF05920:Homeobox KN domain PF05066:HB1, ASXL, restriction endonuclease HTH domain PF00046:Homeobox domain}
transcript_HQ_HBZL_transcript10300/f8p0/2033	2033	1470.07	0	6	5	1	42.65	0	0.17	0.16	0.03	{XP_010264446.1; PREDICTED: protein kinase APK1A, chloroplastic [Nelumbo nucifera]}	{sp|P46573|PBL10_ARATH; Probable serine/threonine-protein kinase PBL10 OS=Arabidopsis thaliana GN=PBL10 PE=1 SV=2}	{nnu:104597190; - - - - -}	{At2g28930; KOG1187 Serine/threonine protein kinase T Signal transduction mechanisms ;}	{GO:0006468; protein phosphorylation; biological_process GO:0004672; protein kinase activity; molecular_function GO:0005524; ATP binding; molecular_function}	{XM_018967712.1; PREDICTED: Juglans regia protein kinase APK1A, chloroplastic-like (LOC108992974), transcript variant X4, mRNA}	{PF07714:Protein tyrosine kinase PF00069:Protein kinase domain}
transcript_HQ_HBZL_transcript10302/f2p0/2028	2026	884.47	0	0	1	0	25.76	0	0	0.03	0	{XP_015958185.1; PREDICTED: protochlorophyllide-dependent translocon component 52, chloroplastic [Arachis duranensis]}	{sp|Q8W496|PTC52_ARATH; Protochlorophyllide-dependent translocon component 52, chloroplastic OS=Arabidopsis thaliana GN=PTC52 PE=2 SV=1}	{aip:107629465; - - - - -}	{NA}	{GO:0055114; oxidation-reduction process; biological_process GO:0051537; 2 iron, 2 sulfur cluster binding; molecular_function GO:0016491; oxidoreductase activity; molecular_function}	{NA}	{PF00355:Rieske [2Fe-2S] domain}
transcript_HQ_HBZL_transcript10305/f2p0/2018	2018	91.48	0	0	0	0	2.68	0	0	0	0	{XP_010246031.1; PREDICTED: uncharacterized protein LOC104589406 [Nelumbo nucifera]}	{NA}	{nnu:104589406; - - - - -}	{At5g06220; KOG1043 Ca2+-binding transmembrane protein LETM1/MRS7 S Function unknown ;}	{GO:0005622; intracellular; cellular_component GO:0006355; regulation of transcription, DNA-dependent; biological_process}	{XM_002323371.2; Populus trichocarpa hypothetical protein (POPTR_0016s07580g) mRNA, complete cds}	{PF03166:MH2 domain}
transcript_HQ_HBZL_transcript10306/f4p0/2018	2018	927.98	0	0	0	0	27.15	0	0	0	0	{XP_010265847.1; PREDICTED: linoleate 13S-lipoxygenase 2-1, chloroplastic [Nelumbo nucifera]}	{sp|P38418|LOX2_ARATH; Lipoxygenase 2, chloroplastic OS=Arabidopsis thaliana GN=LOX2 PE=1 SV=1}	{vvi:100257867; K00454 LOX2S lipoxygenase 1.13.11.12 ko00591; Metabolism; Lipid metabolism; Linoleic acid metabolism | ko00592; Metabolism; Lipid metabolism; alpha-Linolenic acid metabolism}	{NA}	{GO:0055114; oxidation-reduction process; biological_process GO:0016702; oxidoreductase activity, acting on single donors with incorporation of molecular oxygen, incorporation of two atoms of oxygen; molecular_function GO:0046872; metal ion binding; molecular_function}	{KC706488.1; Malus x domestica clone 2 lipoxygenase (LOX5a) mRNA, complete cds}	{PF00305:Lipoxygenase}
transcript_HQ_HBZL_transcript10309/f6p0/2027	2027	1673	0	0	0	0	48.7	0	0	0	0	{XP_010244962.1; PREDICTED: protein IQ-DOMAIN 1-like [Nelumbo nucifera]}	{sp|Q9SF32|IQD1_ARATH; Protein IQ-DOMAIN 1 OS=Arabidopsis thaliana GN=IQD1 PE=1 SV=1}	{nnu:104594778; - - - - -}	{NA}	{GO:0005515; protein binding; molecular_function}	{XM_002315246.2; Populus trichocarpa hypothetical protein (POPTR_0010s22510g) mRNA, complete cds}	{PF00612:IQ calmodulin-binding motif}
transcript_HQ_HBZL_transcript10311/f2p0/2031	2033	783	195	234	284	256	22.72	5.35	6.78	9.28	7.67	{XP_018847042.1; PREDICTED: asparagine--tRNA ligase, chloroplastic/mitochondrial isoform X2 [Juglans regia]}	{sp|O48593|SYNO_ARATH; Asparagine--tRNA ligase, chloroplastic/mitochondrial OS=Arabidopsis thaliana GN=SYNO PE=2 SV=3}	{fve:101311319; K01893 NARS, asnS asparaginyl-tRNA synthetase 6.1.1.22 ko00970; Genetic Information Processing; Translation; Aminoacyl-tRNA biosynthesis}	{At4g17300; KOG0554 Asparaginyl-tRNA synthetase (mitochondrial) J Translation, ribosomal structure and biogenesis ;}	{GO:0003676; nucleic acid binding; molecular_function}	{XM_010260630.2; PREDICTED: Nelumbo nucifera asparagine--tRNA ligase, chloroplastic/mitochondrial (LOC104598521), transcript variant X2, mRNA}	{PF01336:OB-fold nucleic acid binding domain}
transcript_HQ_HBZL_transcript10313/f2p0/2012	2012	115	0	16	4	38	3.38	0	0.47	0.13	1.15	{XP_010250784.1; PREDICTED: transcription termination factor MTERF15, mitochondrial-like [Nelumbo nucifera]}	{NA}	{nnu:104592930; K15032 MTERFD mTERF domain-containing protein, mitochondrial - -}	{At5g07900; KOG1267 Mitochondrial transcription termination factor, mTERF KR Transcription ; General function prediction only ;}	{GO:0006355; regulation of transcription, DNA-dependent; biological_process GO:0003690; double-stranded DNA binding; molecular_function}	{NA}	{PF02536:mTERF}
transcript_HQ_HBZL_transcript10314/f2p0/2008	2008	79.35	0	0	0	0	2.33	0	0	0	0	{XP_015579251.1; PREDICTED: protein SSUH2 homolog isoform X1 [Ricinus communis]}	{NA}	{egu:105043834; - - - - -}	{NA}	{GO:0031072; heat shock protein binding; molecular_function GO:0051082; unfolded protein binding; molecular_function}	{XM_016700608.1; PREDICTED: Capsicum annuum protein SSUH2 homolog (LOC107855592), mRNA}	{PF00684:DnaJ central domain}
transcript_HQ_HBZL_transcript10315/f3p0/2037	2037	432.22	2.5	2	0	1	12.51	0.07	0.06	0	0.03	{XP_010270524.1; PREDICTED: MLO-like protein 9 [Nelumbo nucifera]}	{sp|Q9FKY5|MLO10_ARATH; MLO-like protein 10 OS=Arabidopsis thaliana GN=MLO10 PE=2 SV=1}	{cit:102613602; K08472 MLO mlo protein - -}	{NA}	{GO:0006952; defense response; biological_process GO:0016021; integral to membrane; cellular_component}	{XM_002276572.4; PREDICTED: Vitis vinifera MLO-like protein 10 (LOC100233061), mRNA}	{PF03094:Mlo family}
transcript_HQ_HBZL_transcript10316/f2p0/2059	2057	445	49	12	0	0	12.74	1.33	0.34	0	0	{XP_010241796.1; PREDICTED: NAC domain-containing protein 26-like [Nelumbo nucifera]}	{sp|F4JH53|FDM2_ARATH; Factor of DNA methylation 2 OS=Arabidopsis thaliana GN=FDM2 PE=1 SV=1}	{nnu:104597179; - - - - -}	{NA}	{NA}	{NA}	{NA}
transcript_HQ_HBZL_transcript10317/f3p0/2026	2026	490	0	0	0.93	1.01	14.27	0	0	0.03	0.03	{CBI35175.3; unnamed protein product, partial [Vitis vinifera]}	{sp|Q93WU6|WRK74_ARATH; Probable WRKY transcription factor 74 OS=Arabidopsis thaliana GN=WRKY74 PE=2 SV=2}	{pop:POPTR_0002s04440g; - - - - -}	{NA}	{GO:0005634; nucleus; cellular_component GO:0006355; regulation of transcription, DNA-dependent; biological_process GO:0046660; female sex differentiation; biological_process GO:0043565; sequence-specific DNA binding; molecular_function GO:0006397; mRNA processing; biological_process GO:0003700; sequence-specific DNA binding transcription factor activity; molecular_function}	{XM_007199137.1; Prunus persica hypothetical protein (PRUPE_ppa021657mg) mRNA, partial cds}	{PF06495:Fruit fly transformer protein PF03106:WRKY DNA -binding domain}
transcript_HQ_HBZL_transcript10319/f4p0/2005	2005	986.33	494.59	162.94	0	0	29.07	13.79	4.8	0	0	{XP_010242939.1; PREDICTED: nuclear/nucleolar GTPase 2 [Nelumbo nucifera]}	{sp|Q9C923|NUG2_ARATH; Nuclear/nucleolar GTPase 2 OS=Arabidopsis thaliana GN=NUG2 PE=1 SV=1}	{jcu:105629173; K14537 NUG2, GNL2 nuclear GTP-binding protein - ko03008; Genetic Information Processing; Translation; Ribosome biogenesis in eukaryotes}	{At1g52980; KOG2423 Nucleolar GTPase R General function prediction only ;}	{GO:0003924; GTPase activity; molecular_function GO:0005525; GTP binding; molecular_function}	{XM_012210715.1; PREDICTED: Jatropha curcas nucleolar GTP-binding protein 2 (LOC105629173), transcript variant X1, mRNA}	{PF02421:Ferrous iron transport protein B PF03193:Protein of unknown function, DUF258 PF01926:50S ribosome-binding GTPase PF00025:ADP-ribosylation factor family}
transcript_HQ_HBZL_transcript1031/f20p0/3748	3748	2687.11	0	0	0	0	39.88	0	0	0	0	{CDP13566.1; unnamed protein product [Coffea canephora]}	{sp|Q9FPR3|EDR1_ARATH; Serine/threonine-protein kinase EDR1 OS=Arabidopsis thaliana GN=EDR1 PE=1 SV=1}	{sot:102604714; - - - - -}	{At1g16270_2; KOG0192 Tyrosine kinase specific for activated (GTP-bound) p21cdc42Hs T Signal transduction mechanisms ;}	{GO:0004672; protein kinase activity; molecular_function GO:0005515; protein binding; molecular_function GO:0006468; protein phosphorylation; biological_process GO:0005524; ATP binding; molecular_function}	{XM_010650690.2; PREDICTED: Vitis vinifera uncharacterized LOC100242423 (LOC100242423), transcript variant X2, mRNA}	{PF07714:Protein tyrosine kinase PF00069:Protein kinase domain PF00564:PB1 domain}
transcript_HQ_HBZL_transcript10320/f3p0/2040	2040	1614.23	0	0	0	0	46.65	0	0	0	0	{XP_010255123.1; PREDICTED: nucleobase-ascorbate transporter 3 [Nelumbo nucifera]}	{sp|Q8GZD4|NAT3_ARATH; Nucleobase-ascorbate transporter 3 OS=Arabidopsis thaliana GN=NAT3 PE=2 SV=2}	{nnu:104595875; K14611 SLC23A1_2, SVCT1_2 solute carrier family 23 (nucleobase transporter), member 1/2 - -}	{At2g26510; KOG1292 Xanthine/uracil transporters F Nucleotide transport and metabolism ;}	{GO:0055085; transmembrane transport; biological_process GO:0006810; transport; biological_process GO:0016021; integral to membrane; cellular_component GO:0006886; intracellular protein transport; biological_process GO:0005215; NA GO:0016020; membrane; cellular_component GO:0005783; endoplasmic reticulum; cellular_component}	{XM_006434806.1; Citrus clementina hypothetical protein (CICLE_v10000779mg) mRNA, complete cds}	{PF00860:Permease family PF05529:B-cell receptor-associated protein 31-like }
transcript_HQ_HBZL_transcript10323/f3p0/2020	2020	1396	0	0	0	0	40.8	0	0	0	0	{XP_010242143.1; PREDICTED: protein transport protein Sec61 subunit alpha [Nelumbo nucifera]}	{sp|Q54XK2|SC61A_DICDI; Protein transport protein Sec61 subunit alpha OS=Dictyostelium discoideum GN=sec61a PE=3 SV=1}	{pper:PRUPE_ppa005115mg; K10956 SEC61A protein transport protein SEC61 subunit alpha - ko03060; Genetic Information Processing; Folding, sorting and degradation; Protein export | ko04141; Genetic Information Processing; Folding, sorting and degradation; Protein processing in endoplasmic reticulum | ko04145; Cellular Processes; Transport and catabolism; Phagosome | ko05110; Human Diseases; Infecti…	{At2g34250; KOG1373 Transport protein Sec61, alpha subunit UO Intracellular trafficking, secretion, and vesicular transport ; Posttranslational modification, protein turnover, chaperones ;}	{GO:0016020; membrane; cellular_component GO:0015031; protein transport; biological_process}	{XM_010243841.2; PREDICTED: Nelumbo nucifera protein transport protein Sec61 subunit alpha (LOC104586563), mRNA}	{PF00344:SecY translocase}
transcript_HQ_HBZL_transcript10325/f3p0/2007	2007	454.66	0	0	0	0	13.38	0	0	0	0	{XP_018814457.1; PREDICTED: tetrahydrocannabinolic acid synthase-like [Juglans regia]}	{sp|Q93ZA3|BBE13_ARATH; Berberine bridge enzyme-like 13 OS=Arabidopsis thaliana GN=At1g30760 PE=1 SV=1}	{pop:POPTR_0001s43120g; - - - - -}	{NA}	{NA}	{XM_008227440.2; PREDICTED: Prunus mume tetrahydrocannabinolic acid synthase-like (LOC103325284), mRNA}	{NA}
transcript_HQ_HBZL_transcript10326/f2p0/2017	2017	181	4	2	4	0	5.3	0.11	0.06	0.13	0	{XP_010267407.1; PREDICTED: protein IQ-DOMAIN 1 [Nelumbo nucifera]}	{sp|Q9SF32|IQD1_ARATH; Protein IQ-DOMAIN 1 OS=Arabidopsis thaliana GN=IQD1 PE=1 SV=1}	{pvu:PHAVU_010G118500g; - - - - -}	{NA}	{GO:0005515; protein binding; molecular_function}	{NA}	{PF00612:IQ calmodulin-binding motif}
transcript_HQ_HBZL_transcript10327/f2p0/2014	2014	182.62	0	0	7.2	4.44	5.36	0	0	0.24	0.13	{OAY60372.1; hypothetical protein MANES_01G107000 [Manihot esculenta]}	{sp|Q84TD8|FLXL2_ARATH; Protein FLX-like 2 OS=Arabidopsis thaliana GN=FLXL2 PE=1 SV=1}	{rcu:8286631; - - - - -}	{NA}	{GO:0051082; unfolded protein binding; molecular_function GO:0070840; dynein complex binding; molecular_function GO:0006810; transport; biological_process GO:0015743; malate transport; biological_process GO:0019901; protein kinase binding; molecular_function GO:0042803; protein homodimerization activity; molecular_function GO:0008134; transcription factor binding; molecular_function GO:0006914; a…	{NA}	{PF10473:Leucine-rich repeats of kinetochore protein Cenp-F/LEK1 PF15898:cGMP-dependent protein kinase interacting domain PF04632:Fusaric acid resistance protein family PF07989:Centrosomin N-terminal motif 1 PF04111:Autophagy protein Apg6 PF11744:Aluminium activated malate transporter PF03938:Outer membrane protein (OmpH-like)}
transcript_HQ_HBZL_transcript10329/f2p0/2006	2006	851.98	0	38.44	83.28	69.27	25.1	0	1.13	2.76	2.11	{AEZ06401.1; SWN-like protein [Aquilegia coerulea]}	{sp|Q8S4P4|EZ3_MAIZE; Histone-lysine N-methyltransferase EZ3 OS=Zea mays GN=EZ3 PE=2 SV=1}	{bdi:100832275; K11430 EZH2 histone-lysine N-methyltransferase EZH2 2.1.1.43 ko00310; Metabolism; Amino acid metabolism; Lysine degradation | ko05206; Human Diseases; Cancers: Overview; MicroRNAs in cancer}	{At4g02020; KOG1079 Transcriptional repressor EZH1 K Transcription ;}	{GO:0005515; protein binding; molecular_function}	{JN944601.1; Aquilegia coerulea SWN-like protein mRNA, complete cds}	{PF00856:SET domain}
transcript_HQ_HBZL_transcript10330/f2p0/1992	1992	64.36	0	0	0	0	1.91	0	0	0	0	{XP_006340137.1; PREDICTED: F-box protein At3g26010-like [Solanum tuberosum]}	{NA}	{sot:102599747; - - - - -}	{NA}	{GO:0005515; protein binding; molecular_function}	{NA}	{PF12937:F-box-like PF00646:F-box domain}
transcript_HQ_HBZL_transcript10331/f7p0/2015	2015	2110.28	6.52	4.94	0	0	61.85	0.18	0.14	0	0	{XP_018812995.1; PREDICTED: jasmonic acid-amido synthetase JAR1-like isoform X1 [Juglans regia]}	{sp|Q6I581|GH35_ORYSJ; Jasmonic acid-amido synthetase JAR1 OS=Oryza sativa subsp. japonica GN=GH3.5 PE=2 SV=1}	{gra:105791543; K14506 JAR1 jasmonic acid-amino synthetase - ko04075; Environmental Information Processing; Signal transduction; Plant hormone signal transduction}	{NA}	{NA}	{XM_018972371.1; PREDICTED: Juglans regia jasmonic acid-amido synthetase JAR1-like (LOC108996457), transcript variant X3, mRNA}	{NA}
transcript_HQ_HBZL_transcript10334/f4p0/2012	2012	726	1	0	0	0	21.31	0.03	0	0	0	{ALG05139.1; polyphenol oxidase [Sinopodophyllum hexandrum]}	{sp|P43311|PPO_VITVI; Polyphenol oxidase, chloroplastic OS=Vitis vinifera PE=1 SV=1}	{egu:105045129; K00422 E1.10.3.1 polyphenol oxidase 1.10.3.1 ko00350; Metabolism; Amino acid metabolism; Tyrosine metabolism | ko00950; Metabolism; Biosynthesis of other secondary metabolites; Isoquinoline alkaloid biosynthesis}	{NA}	{GO:0016491; oxidoreductase activity; molecular_function GO:0004097; catechol oxidase activity; molecular_function GO:0008152; NA GO:0055114; oxidation-reduction process; biological_process}	{NA}	{PF12142:Polyphenol oxidase middle domain PF12143:Protein of unknown function (DUF_B2219) PF00264:Common central domain of tyrosinase}
transcript_HQ_HBZL_transcript1033/f2p0/3749	3749	168.15	0	0	0	0	2.49	0	0	0	0	{XP_010266808.1; PREDICTED: uncharacterized protein LOC104604237 [Nelumbo nucifera]}	{NA}	{pmum:103321231; - - - - -}	{NA}	{NA}	{NA}	{NA}
transcript_HQ_HBZL_transcript10340/f4p0/2029	2029	406	0	38	36	45	11.81	0	1.1	1.18	1.35	{XP_015884053.1; PREDICTED: MLO protein homolog 1-like [Ziziphus jujuba]}	{sp|O49873|MLOH1_HORVU; MLO protein homolog 1 OS=Hordeum vulgare GN=MLO-H1 PE=3 SV=1}	{jcu:105635199; K08472 MLO mlo protein - -}	{NA}	{GO:0016021; integral to membrane; cellular_component GO:0006952; defense response; biological_process}	{XM_019005074.1; PREDICTED: Juglans regia MLO protein homolog 1-like (LOC109022230), mRNA}	{PF03094:Mlo family}
transcript_HQ_HBZL_transcript10341/f4p0/2009	2009	7492.22	0	0	0	0	220.32	0	0	0	0	{XP_010258325.1; PREDICTED: cystathionine gamma-synthase 1, chloroplastic [Nelumbo nucifera]}	{sp|P55217|CGS1_ARATH; Cystathionine gamma-synthase 1, chloroplastic OS=Arabidopsis thaliana GN=CGS1 PE=1 SV=3}	{nnu:104598107; K01739 metB cystathionine gamma-synthase 2.5.1.48 ko01230; Metabolism; Global and overview maps; Biosynthesis of amino acids | ko00920; Metabolism; Energy metabolism; Sulfur metabolism | ko00270; Metabolism; Amino acid metabolism; Cysteine and methionine metabolism | ko00450; Metabolism; Metabolism of other amino acids; Selenocompound metabolism}	{At3g01120; KOG0053 Cystathionine beta-lyases/cystathionine gamma-synthases E Amino acid transport and metabolism ;}	{GO:0009058; biosynthetic process; biological_process GO:0006520; cellular amino acid metabolic process; biological_process GO:0030170; pyridoxal phosphate binding; molecular_function GO:0016829; lyase activity; molecular_function}	{XM_002283830.4; PREDICTED: Vitis vinifera cystathionine gamma-synthase 1, chloroplastic (LOC100267880), mRNA}	{PF01212:Beta-eliminating lyase PF01053:Cys/Met metabolism PLP-dependent enzyme PF00155:Aminotransferase class I and II}
transcript_HQ_HBZL_transcript10343/f21p0/1985	1985	3426.9	0	0	0	0	102.16	0	0	0	0	{XP_012074070.1; PREDICTED: 4-coumarate--CoA ligase 2-like [Jatropha curcas]}	{sp|O24145|4CL1_TOBAC; 4-coumarate--CoA ligase 1 OS=Nicotiana tabacum GN=4CL1 PE=2 SV=1}	{jcu:105635600; K01904 4CL 4-coumarate--CoA ligase 6.2.1.12 ko00360; Metabolism; Amino acid metabolism; Phenylalanine metabolism | ko00130; Metabolism; Metabolism of cofactors and vitamins; Ubiquinone and other terpenoid-quinone biosynthesis | ko00940; Metabolism; Biosynthesis of other secondary metabolites; Phenylpropanoid biosynthesis}	{At1g51680; KOG1176 Acyl-CoA synthetase I Lipid transport and metabolism ;}	{GO:0003824; NA GO:0008152; NA}	{XM_009799810.1; PREDICTED: Nicotiana sylvestris 4-coumarate--CoA ligase 2 (LOC104244401), mRNA}	{PF00501:AMP-binding enzyme}
transcript_HQ_HBZL_transcript10344/f14p0/2006	2007	892	3	11.19	0	0	26.26	0.08	0.33	0	0	{XP_010274246.1; PREDICTED: uncharacterized protein LOC104609584 [Nelumbo nucifera]}	{NA}	{vvi:100245954; - - - - -}	{NA}	{NA}	{XM_002520924.2; PREDICTED: Ricinus communis uncharacterized LOC8274718 (LOC8274718), mRNA}	{NA}
transcript_HQ_HBZL_transcript10345/f2p0/2017	2022	220	0	5	0	3	6.42	0	0.15	0	0.09	{OMO89592.1; hypothetical protein CCACVL1_07748 [Corchorus capsularis]}	{NA}	{atr:18447801; - - - - -}	{NA}	{GO:0006886; intracellular protein transport; biological_process GO:0030127; COPII vesicle coat; cellular_component GO:0008270; zinc ion binding; molecular_function GO:0006888; ER to Golgi vesicle-mediated transport; biological_process}	{NA}	{PF04810:Sec23/Sec24 zinc finger}
transcript_HQ_HBZL_transcript10347/f9p0/2006	2006	1042	0	0	0	0	30.69	0	0	0	0	{XP_010248593.1; PREDICTED: pollen-specific leucine-rich repeat extensin-like protein 3 [Nelumbo nucifera]}	{NA}	{nnu:104591454; - - - - -}	{NA}	{GO:0030168; platelet activation; biological_process GO:0005577; fibrinogen complex; cellular_component GO:0007165; signal transduction; biological_process GO:0051258; protein polymerization; biological_process GO:0030674; protein binding, bridging; molecular_function GO:0005102; receptor binding; molecular_function GO:0018024; histone-lysine N-methyltransferase activity; molecular_function}	{AC235237.1; Glycine max strain Williams 82 clone GM_WBb0028M07, complete sequence}	{PF10440:Ubiquitin-binding WIYLD domain PF08702:Fibrinogen alpha/beta chain family}
transcript_HQ_HBZL_transcript10350/f5p0/2040	2040	7600.73	0	0	0	0	219.67	0	0	0	0	{CAP64331.1; TPA: putative GID1-like gibberellin receptor [Aquilegia formosa x Aquilegia pubescens]}	{sp|Q940G6|GID1C_ARATH; Gibberellin receptor GID1C OS=Arabidopsis thaliana GN=GID1C PE=1 SV=1}	{cit:102619373; K14493 GID1 gibberellin receptor GID1 3.-.-.- ko04075; Environmental Information Processing; Signal transduction; Plant hormone signal transduction}	{At5g27320; KOG1515 Arylacetamide deacetylase V Defense mechanisms ;}	{GO:0008152; NA GO:0016787; hydrolase activity; molecular_function GO:0015996; chlorophyll catabolic process; biological_process GO:0047746; chlorophyllase activity; molecular_function}	{BN001198.1; TPA_inf: Aquilegia formosa x Aquilegia pubescens mRNA for putative GID1-like gibberellin receptor (GID1 gene)}	{PF12740:Chlorophyllase enzyme PF07859:alpha/beta hydrolase fold}
transcript_HQ_HBZL_transcript10352/f2p0/2011	2013	155.64	0	0	0	0	4.57	0	0	0	0	{XP_002265927.1; PREDICTED: probable aldo-keto reductase 2 [Vitis vinifera]}	{sp|Q7XT99|AKR2_ORYSJ; Probable aldo-keto reductase 2 OS=Oryza sativa subsp. japonica GN=Os04g0338000 PE=2 SV=2}	{pmum:103342580; - - - - -}	{At1g60690; KOG1575 Voltage-gated shaker-like K+ channel, subunit beta/KCNAB C Energy production and conversion ;}	{NA}	{EF147601.1; Populus trichocarpa clone WS0123_L10 unknown mRNA}	{NA}
transcript_HQ_HBZL_transcript10354/f2p0/2005	2004	162.14	0	0	2.19	1	4.78	0	0	0.07	0.03	{XP_010274864.1; PREDICTED: uncharacterized protein LOC104610084 [Nelumbo nucifera]}	{sp|A5DQJ8|SIP5_PICGU; Protein SIP5 OS=Meyerozyma guilliermondii (strain ATCC 6260 / CBS 566 / DSM 6381 / JCM 1539 / NBRC 10279 / NRRL Y-324) GN=SIP5 PE=3 SV=2}	{nnu:104610084; - - - - -}	{At1g78420; KOG2789 Putative Zn-finger protein R General function prediction only ;}	{NA}	{XM_002530084.2; PREDICTED: Ricinus communis uncharacterized LOC8268052 (LOC8268052), mRNA}	{NA}
transcript_HQ_HBZL_transcript10355/f2p0/1990	1990	289.71	9.64	4.1	1	2	8.61	0.27	0.12	0.03	0.06	{XP_017441164.1; PREDICTED: protein S-acyltransferase 24 isoform X2 [Vigna angularis]}	{sp|Q52T38|ZDH22_ARATH; Protein S-acyltransferase 24 OS=Arabidopsis thaliana GN=PAT24 PE=2 SV=1}	{cit:102610160; K20032 ZDHHC13_17, HIP14 palmitoyltransferase ZDHHC13/17 2.3.1.225 -}	{At5g20350; KOG0509 Ankyrin repeat and DHHC-type Zn-finger domain containing proteins R General function prediction only ;}	{GO:0005515; protein binding; molecular_function}	{XM_010246594.2; PREDICTED: Nelumbo nucifera protein S-acyltransferase 24-like (LOC104588594), mRNA}	{PF13606:Ankyrin repeat PF00023:Ankyrin repeat}
transcript_HQ_HBZL_transcript10356/f4p0/1998	1998	478	0	19.33	19.01	30.64	14.14	0	0.57	0.63	0.94	{XP_019080148.1; PREDICTED: vacuolar protein sorting-associated protein 36 isoform X1 [Vitis vinifera]}	{sp|Q9FF81|VPS36_ARATH; Vacuolar protein sorting-associated protein 36 OS=Arabidopsis thaliana GN=VPS36 PE=1 SV=1}	{vvi:100267752; K12190 VPS36, EAP45 ESCRT-II complex subunit VPS36 - ko04144; Cellular Processes; Transport and catabolism; Endocytosis}	{At5g04920; KOG2760 Vacuolar sorting protein VPS36 U Intracellular trafficking, secretion, and vesicular transport ;}	{GO:0043130; ubiquitin binding; molecular_function GO:0032266; phosphatidylinositol-3-phosphate binding; molecular_function}	{XM_010245526.2; PREDICTED: Nelumbo nucifera vacuolar protein sorting-associated protein 36 (LOC104587803), transcript variant X2, mRNA}	{PF11605:Vacuolar protein sorting protein 36 Vps36}
transcript_HQ_HBZL_transcript10357/f2p0/2034	2034	307.18	0	0	0	0	8.91	0	0	0	0	{CDP10466.1; unnamed protein product [Coffea canephora]}	{sp|Q9ASQ5|CRCK3_ARATH; Calmodulin-binding receptor-like cytoplasmic kinase 3 OS=Arabidopsis thaliana GN=CRCK3 PE=2 SV=1}	{vvi:100250654; - - - - -}	{At2g11520; KOG1187 Serine/threonine protein kinase T Signal transduction mechanisms ;}	{GO:0004672; protein kinase activity; molecular_function GO:0006468; protein phosphorylation; biological_process GO:0005524; ATP binding; molecular_function}	{XM_017580532.1; PREDICTED: Vigna angularis calmodulin-binding receptor-like cytoplasmic kinase 3 (LOC108342744), mRNA}	{PF07714:Protein tyrosine kinase PF00069:Protein kinase domain}
transcript_HQ_HBZL_transcript10362/f3p0/2022	2022	727.08	0	0	0	0	21.23	0	0	0	0	{XP_016651783.1; PREDICTED: protein NRT1/ PTR FAMILY 5.5 isoform X1 [Prunus mume]}	{sp|O80436|PTR29_ARATH; Protein NRT1/ PTR FAMILY 5.5 OS=Arabidopsis thaliana GN=NPF5.5 PE=2 SV=1}	{pper:PRUPEppa1027125mg; - - - - -}	{At2g38100; KOG1237 H+/oligopeptide symporter E Amino acid transport and metabolism ;}	{GO:0000271; polysaccharide biosynthetic process; biological_process GO:0005215; NA GO:0016020; membrane; cellular_component GO:0006810; transport; biological_process GO:0016021; integral to membrane; cellular_component}	{NA}	{PF04138:GtrA-like protein PF00854:POT family}
transcript_HQ_HBZL_transcript10363/f6p0/2004	2004	980.17	0	0	0	0	28.9	0	0	0	0	{XP_010266119.1; PREDICTED: probable serine/threonine-protein kinase At4g35230 [Nelumbo nucifera]}	{sp|Q944A7|Y4523_ARATH; Probable serine/threonine-protein kinase At4g35230 OS=Arabidopsis thaliana GN=At4g35230 PE=1 SV=1}	{pop:POPTR_0004s19340g; K14500 BSK BR-signaling kinase 2.7.11.1 ko04075; Environmental Information Processing; Signal transduction; Plant hormone signal transduction}	{NA}	{GO:0006468; protein phosphorylation; biological_process GO:0004672; protein kinase activity; molecular_function GO:0005524; ATP binding; molecular_function}	{XM_002306187.2; Populus trichocarpa kinase family protein (POPTR_0004s19340g) mRNA, complete cds}	{PF07714:Protein tyrosine kinase PF00069:Protein kinase domain}
transcript_HQ_HBZL_transcript10365/f3p0/2013	2013	527	0	0	0	0	15.46	0	0	0	0	{XP_010267284.1; PREDICTED: acyl-CoA-binding domain-containing protein 4 [Nelumbo nucifera]}	{sp|Q8RWD9|ACBP5_ARATH; Acyl-CoA-binding domain-containing protein 5 OS=Arabidopsis thaliana GN=ACBP5 PE=1 SV=1}	{vvi:100253103; - - - - -}	{At5g04420; KOG0379 Kelch repeat-containing proteins R General function prediction only ;}	{GO:0006914; autophagy; biological_process GO:0007049; cell cycle; biological_process GO:0006457; protein folding; biological_process GO:0005882; intermediate filament; cellular_component GO:0005741; mitochondrial outer membrane; cellular_component GO:0008053; mitochondrial fusion; biological_process GO:0005198; NA GO:0005515; protein binding; molecular_function GO:0048870; cell motility; biologi…	{XM_012592192.1; PREDICTED: Gossypium raimondii acyl-CoA-binding domain-containing protein 4 (LOC105770836), transcript variant X3, mRNA}	{PF01920:Prefoldin subunit PF04111:Autophagy protein Apg6 PF13851:Growth-arrest specific micro-tubule binding PF01344:Kelch motif PF00038:Intermediate filament protein PF07646:Kelch motif PF04977:Septum formation initiator PF04799:fzo-like conserved region}
transcript_HQ_HBZL_transcript10366/f7p0/2017	2018	926.22	0	0	0	0	27.1	0	0	0	0	{XP_010264165.1; PREDICTED: 3-phosphoshikimate 1-carboxyvinyltransferase 2 [Nelumbo nucifera]}	{sp|P11043|AROA_PETHY; 3-phosphoshikimate 1-carboxyvinyltransferase, chloroplastic OS=Petunia hybrida PE=1 SV=1}	{csv:101215568; K00800 aroA 3-phosphoshikimate 1-carboxyvinyltransferase 2.5.1.19 ko01230; Metabolism; Global and overview maps; Biosynthesis of amino acids | ko00400; Metabolism; Amino acid metabolism; Phenylalanine, tyrosine and tryptophan biosynthesis}	{At2g45300; KOG0692 Pentafunctional AROM protein E Amino acid transport and metabolism ;}	{GO:0016765; transferase activity, transferring alkyl or aryl (other than methyl) groups; molecular_function}	{XM_010265863.2; PREDICTED: Nelumbo nucifera 3-phosphoshikimate 1-carboxyvinyltransferase 2 (LOC104602250), mRNA}	{PF00275:EPSP synthase (3-phosphoshikimate 1-carboxyvinyltransferase)}
transcript_HQ_HBZL_transcript10368/f2p0/2053	2052	90.94	0	0	0	0	2.61	0	0	0	0	{XP_010271571.1; PREDICTED: protein RBL [Nelumbo nucifera]}	{sp|Q5E915|RBBP_ARATH; Protein RBL OS=Arabidopsis thaliana GN=RBL PE=1 SV=1}	{nnu:104607600; K14961 RBBP5, SWD1, CPS50 COMPASS component SWD1 - -}	{At3g21060; KOG1273 WD40 repeat protein R General function prediction only ;}	{GO:0005515; protein binding; molecular_function}	{XM_010273269.2; PREDICTED: Nelumbo nucifera protein RBL (LOC104607600), mRNA}	{PF00400:WD domain, G-beta repeat PF01436:NHL repeat}
transcript_HQ_HBZL_transcript10369/f2p0/2046	2045	954	56.8	23.18	19.3	10.07	27.49	1.55	0.67	0.63	0.3	{XP_010270065.1; PREDICTED: EH domain-containing protein 1 [Nelumbo nucifera]}	{sp|Q94CF0|EHD1_ARATH; EH domain-containing protein 1 OS=Arabidopsis thaliana GN=EHD1 PE=1 SV=1}	{egu:105039101; K12483 EHD1 EH domain-containing protein 1 - ko04144; Cellular Processes; Transport and catabolism; Endocytosis}	{At3g20290; KOG1954 Endocytosis/signaling protein EHD1 TU Signal transduction mechanisms ; Intracellular trafficking, secretion, and vesicular transport ;}	{GO:0002949; NA GO:0007264; small GTPase mediated signal transduction; biological_process GO:0005525; GTP binding; molecular_function GO:0005509; calcium ion binding; molecular_function GO:0005515; protein binding; molecular_function}	{XM_010271763.2; PREDICTED: Nelumbo nucifera EH domain-containing protein 1 (LOC104606517), mRNA}	{PF13499:EF-hand domain pair PF13833:EF-hand domain pair PF01926:50S ribosome-binding GTPase PF13405:EF-hand domain PF13202:EF hand PF08477:Ras of Complex, Roc, domain of DAPkinase PF12763:Cytoskeletal-regulatory complex EF hand PF02367:Threonylcarbamoyl adenosine biosynthesis protein TsaE PF00036:EF hand}
transcript_HQ_HBZL_transcript1036/f3p0/3732	3732	530	48.16	14.3	0.61	4	7.9	0.68	0.21	0.01	0.06	{XP_012087712.1; PREDICTED: importin-4 [Jatropha curcas]}	{sp|Q8TEX9|IPO4_HUMAN; Importin-4 OS=Homo sapiens GN=IPO4 PE=1 SV=2}	{vvi:100253220; K20221 IPO4, RANBP4 importin-4 - -}	{At4g27640; KOG2171 Karyopherin (importin) beta 3 YU Nuclear structure ; Intracellular trafficking, secretion, and vesicular transport ;}	{GO:0008536; Ran GTPase binding; molecular_function GO:0006886; intracellular protein transport; biological_process GO:0005515; protein binding; molecular_function}	{XM_010245178.2; PREDICTED: Nelumbo nucifera importin-4-like (LOC104587531), transcript variant X2, mRNA}	{PF02985:HEAT repeat PF03810:Importin-beta N-terminal domain}
transcript_HQ_HBZL_transcript10370/f3p0/2093	2093	1533.4	0	0	0	0	43.05	0	0	0	0	{XP_010253772.1; PREDICTED: phosphoinositide phosphatase SAC8 isoform X2 [Nelumbo nucifera]}	{sp|Q96328|SAC8_ARATH; Phosphoinositide phosphatase SAC8 OS=Arabidopsis thaliana GN=SAC8 PE=2 SV=1}	{nnu:104594919; - - - - -}	{At3g51830; KOG1889 Putative phosphoinositide phosphatase I Lipid transport and metabolism ;}	{GO:0042578; phosphoric ester hydrolase activity; molecular_function}	{XM_010255470.2; PREDICTED: Nelumbo nucifera phosphoinositide phosphatase SAC8 (LOC104594919), transcript variant X3, mRNA}	{PF02383:SacI homology domain}
transcript_HQ_HBZL_transcript10373/f4p0/2016	2016	907	5	7.24	24.84	28.53	26.57	0.14	0.21	0.82	0.86	{OMO78670.1; Armadillo [Corchorus capsularis]}	{sp|Q681N2|PUB15_ARATH; U-box domain-containing protein 15 OS=Arabidopsis thaliana GN=PUB15 PE=2 SV=2}	{nnu:104596175; - - - - -}	{At2g45720; KOG0167 FOG: Armadillo/beta-catenin-like repeats S Function unknown ;}	{NA}	{XM_004492628.2; PREDICTED: Cicer arietinum uncharacterized LOC101489048 (LOC101489048), mRNA}	{NA}
transcript_HQ_HBZL_transcript10374/f3p0/2012	2012	1353.72	2	0	0	0	39.74	0.06	0	0	0	{XP_010259392.1; PREDICTED: calmodulin-binding protein 60 D-like isoform X2 [Nelumbo nucifera]}	{sp|Q9FKL6|CB60B_ARATH; Calmodulin-binding protein 60 B OS=Arabidopsis thaliana GN=CBP60B PE=2 SV=1}	{nnu:104598845; - - - - -}	{NA}	{GO:0005516; calmodulin binding; molecular_function GO:0006950; response to stress; biological_process}	{NA}	{PF07887:Calmodulin binding protein-like}
transcript_HQ_HBZL_transcript10375/f2p0/1979	1978	2818.12	0	0	0	0	84.35	0	0	0	0	{XP_010246462.1; PREDICTED: shaggy-related protein kinase eta [Nelumbo nucifera]}	{sp|Q39010|KSG6_ARATH; Shaggy-related protein kinase zeta OS=Arabidopsis thaliana GN=ASK6 PE=2 SV=2}	{pda:103706864; - - - - -}	{At2g30980; KOG0658 Glycogen synthase kinase-3 G Carbohydrate transport and metabolism ;}	{GO:0004672; protein kinase activity; molecular_function GO:0006468; protein phosphorylation; biological_process GO:0005524; ATP binding; molecular_function}	{XM_010248160.2; PREDICTED: Nelumbo nucifera shaggy-related protein kinase eta (LOC104589738), mRNA}	{PF07714:Protein tyrosine kinase PF00069:Protein kinase domain}
transcript_HQ_HBZL_transcript10378/f4p0/2014	2014	797	0	0	0	0	23.37	0	0	0	0	{XP_010247193.1; PREDICTED: adenylosuccinate synthetase 2, chloroplastic-like [Nelumbo nucifera]}	{sp|Q96529|PURA_ARATH; Adenylosuccinate synthetase, chloroplastic OS=Arabidopsis thaliana GN=PURA PE=1 SV=1}	{eus:EUTSA_v10005919mg; K01939 purA, ADSS adenylosuccinate synthase 6.3.4.4 ko00230; Metabolism; Nucleotide metabolism; Purine metabolism | ko00250; Metabolism; Amino acid metabolism; Alanine, aspartate and glutamate metabolism}	{At3g57610; KOG1355 Adenylosuccinate synthase F Nucleotide transport and metabolism ;}	{GO:0004019; adenylosuccinate synthase activity; molecular_function GO:0005525; GTP binding; molecular_function GO:0006164; purine nucleotide biosynthetic process; biological_process}	{XM_012230707.1; PREDICTED: Jatropha curcas adenylosuccinate synthetase 2, chloroplastic (LOC105645178), mRNA}	{PF00709:Adenylosuccinate synthetase}
transcript_HQ_HBZL_transcript10379/f2p0/2013	2013	416.14	0.01	0	0	133.83	12.21	0	0	0	4.05	{XP_010259454.1; PREDICTED: fumarate hydratase 1, mitochondrial [Nelumbo nucifera]}	{sp|P93033|FUM1_ARATH; Fumarate hydratase 1, mitochondrial OS=Arabidopsis thaliana GN=FUM1 PE=1 SV=2}	{nnu:104598878; K01679 E4.2.1.2B, fumC fumarate hydratase, class II 4.2.1.2 ko01200; Metabolism; Global and overview maps; Carbon metabolism | ko00020; Metabolism; Carbohydrate metabolism; Citrate cycle (TCA cycle) | ko00620; Metabolism; Carbohydrate metabolism; Pyruvate metabolism | ko00720; Metabolism; Energy metabolism; Carbon fixation pathways in prokaryotes | ko05200; Human Diseases; Cancers…	{At2g47510; KOG1317 Fumarase C Energy production and conversion ;}	{NA}	{XM_010261152.2; PREDICTED: Nelumbo nucifera fumarate hydratase 1, mitochondrial (LOC104598878), mRNA}	{NA}
transcript_HQ_HBZL_transcript1037/f6p0/3763	3762	885	22	15	22	26	13.08	0.31	0.22	0.37	0.4	{XP_010654344.1; PREDICTED: uncharacterized protein LOC104880184 isoform X1 [Vitis vinifera]}	{sp|P9WMV8|CHOD_MYCTO; Cholesterol oxidase OS=Mycobacterium tuberculosis (strain CDC 1551 / Oshkosh) GN=choD PE=3 SV=1}	{rcu:8263202; - - - - -}	{NA}	{GO:0008033; tRNA processing; biological_process GO:0016491; oxidoreductase activity; molecular_function GO:0071949; FAD binding; molecular_function GO:0055114; oxidation-reduction process; biological_process GO:0050660; flavin adenine dinucleotide binding; molecular_function GO:0016614; oxidoreductase activity, acting on CH-OH group of donors; molecular_function}	{XM_010655810.2; PREDICTED: Vitis vinifera uncharacterized LOC104880154 (LOC104880154), mRNA}	{PF00732:GMC oxidoreductase PF12831:FAD dependent oxidoreductase PF01134:Glucose inhibited division protein A PF05199:GMC oxidoreductase PF01494:FAD binding domain PF07992:Pyridine nucleotide-disulphide oxidoreductase}
transcript_HQ_HBZL_transcript10380/f3p0/2011	2011	426.31	0	0	0	0	12.52	0	0	0	0	{XP_018827751.1; PREDICTED: probable polyamine transporter At3g19553 [Juglans regia]}	{sp|Q9LH39|PHSD_ARATH; Probable polyamine transporter At3g19553 OS=Arabidopsis thaliana GN=At3g19553 PE=3 SV=1}	{pper:PRUPE_ppa004526mg; - - - - -}	{At3g19553; KOG1287 Amino acid transporters E Amino acid transport and metabolism ;}	{GO:0006810; transport; biological_process GO:0055085; transmembrane transport; biological_process GO:0003333; amino acid transmembrane transport; biological_process GO:0015171; amino acid transmembrane transporter activity; molecular_function GO:0016020; membrane; cellular_component}	{XM_010273923.2; PREDICTED: Nelumbo nucifera probable polyamine transporter At3g19553 (LOC104608058), mRNA}	{PF00324:Amino acid permease PF13520:Amino acid permease}
transcript_HQ_HBZL_transcript10383/f4p0/2042	2042	519.43	0	0	0	0	15	0	0	0	0	{XP_010248593.1; PREDICTED: pollen-specific leucine-rich repeat extensin-like protein 3 [Nelumbo nucifera]}	{NA}	{nnu:104591454; - - - - -}	{NA}	{GO:0051258; protein polymerization; biological_process GO:0007165; signal transduction; biological_process GO:0018024; histone-lysine N-methyltransferase activity; molecular_function GO:0005102; receptor binding; molecular_function GO:0030674; protein binding, bridging; molecular_function GO:0030168; platelet activation; biological_process GO:0005577; fibrinogen complex; cellular_component}	{XM_019004333.1; PREDICTED: Juglans regia transcriptional regulator DEF1-like (LOC109021651), mRNA}	{PF10440:Ubiquitin-binding WIYLD domain PF08702:Fibrinogen alpha/beta chain family}
transcript_HQ_HBZL_transcript10384/f2p0/2019	2020	252.17	0	0	0	0	7.37	0	0	0	0	{XP_018821919.1; PREDICTED: uncharacterized protein LOC108991943 [Juglans regia]}	{NA}	{jcu:105646325; - - - - -}	{At1g80280; KOG1454 Predicted hydrolase/acyltransferase (alpha/beta hydrolase superfamily) R General function prediction only ;}	{NA}	{LT594797.1; Theobroma cacao genome assembly, chromosome: X}	{NA}
transcript_HQ_HBZL_transcript10386/f4p0/2007	2007	220.22	5.52	12.19	14.11	27.15	6.48	0.15	0.36	0.47	0.83	{XP_010262130.1; PREDICTED: imidazole glycerol phosphate synthase hisHF, chloroplastic [Nelumbo nucifera]}	{sp|Q9SZ30|HIS4_ARATH; Imidazole glycerol phosphate synthase hisHF, chloroplastic OS=Arabidopsis thaliana GN=HISN4 PE=2 SV=1}	{cmo:103490133; K01663 HIS7 glutamine amidotransferase / cyclase [EC:2.4.2.- 4.1.3.-] 2.4.2.-,4.1.3.- ko01230; Metabolism; Global and overview maps; Biosynthesis of amino acids | ko00340; Metabolism; Amino acid metabolism; Histidine metabolism}	{At4g26900; KOG0623 Glutamine amidotransferase/cyclase E Amino acid transport and metabolism ;}	{GO:0016787; hydrolase activity; molecular_function GO:0042823; pyridoxal phosphate biosynthetic process; biological_process GO:0004359; glutaminase activity; molecular_function GO:0055114; oxidation-reduction process; biological_process GO:0009236; cobalamin biosynthetic process; biological_process GO:0018580; nitronate monooxygenase activity; molecular_function GO:0003824; NA GO:0006541; glutam…	{XM_002279069.4; PREDICTED: Vitis vinifera imidazole glycerol phosphate synthase hisHF, chloroplastic (LOC100262276), mRNA}	{PF03060:Nitronate monooxygenase PF00977:Histidine biosynthesis protein PF07685:CobB/CobQ-like glutamine amidotransferase domain PF07722:Peptidase C26 PF01174:SNO glutamine amidotransferase family}
transcript_HQ_HBZL_transcript10387/f2p0/2006	2006	514	4.19	0	0	0	15.14	0.12	0	0	0	{XP_007018362.1; PREDICTED: sucrose transport protein SUC4 [Theobroma cacao]}	{sp|Q9FE59|SUC4_ARATH; Sucrose transport protein SUC4 OS=Arabidopsis thaliana GN=SUC4 PE=1 SV=2}	{cit:102621458; K15378 SLC45A1_2_4 solute carrier family 45, member 1/2/4 - -}	{At1g09960; KOG0637 Sucrose transporter and related proteins G Carbohydrate transport and metabolism ;}	{NA}	{XM_010273242.2; PREDICTED: Nelumbo nucifera sucrose transport protein SUC4 (LOC104607575), mRNA}	{NA}
transcript_HQ_HBZL_transcript10388/f2p0/2002	2002	158.34	0	2	1	0	4.67	0	0.06	0.03	0	{CAN69130.1; hypothetical protein VITISV_039323 [Vitis vinifera]}	{sp|O24146|4CL2_TOBAC; 4-coumarate--CoA ligase 2 OS=Nicotiana tabacum GN=4CL2 PE=1 SV=1}	{vvi:100254698; K01904 4CL 4-coumarate--CoA ligase 6.2.1.12 ko00360; Metabolism; Amino acid metabolism; Phenylalanine metabolism | ko00130; Metabolism; Metabolism of cofactors and vitamins; Ubiquinone and other terpenoid-quinone biosynthesis | ko00940; Metabolism; Biosynthesis of other secondary metabolites; Phenylpropanoid biosynthesis}	{At1g51680; KOG1176 Acyl-CoA synthetase I Lipid transport and metabolism ;}	{GO:0008152; NA GO:0003824; NA}	{JN120849.1; Petunia x hybrida 4-coumarate:CoA ligase mRNA, complete cds}	{PF00501:AMP-binding enzyme}
transcript_HQ_HBZL_transcript10389/f3p0/2009	2004	603.44	0	0	0	0	17.8	0	0	0	0	{XP_010266820.1; PREDICTED: synaptotagmin-2-like [Nelumbo nucifera]}	{sp|B6ETT4|SYT2_ARATH; Synaptotagmin-2 OS=Arabidopsis thaliana GN=SYT2 PE=2 SV=1}	{jcu:105635319; - - - - -}	{At1g20080; KOG1012 Ca2+-dependent lipid-binding protein CLB1/vesicle protein vp115/Granuphilin A, contains C2 domain R General function prediction only ;}	{GO:0008289; lipid binding; molecular_function GO:0005515; protein binding; molecular_function}	{XM_002272721.4; PREDICTED: Vitis vinifera synaptotagmin-2 (LOC100260940), mRNA}	{PF17047:Synaptotagmin-like mitochondrial-lipid-binding domain PF00168:C2 domain}
transcript_HQ_HBZL_transcript1038/f3p0/3755	3755	2254	104.39	28.84	7.96	6.97	33.39	1.46	0.43	0.13	0.11	{XP_010259449.1; PREDICTED: protein TPR1 isoform X3 [Nelumbo nucifera]}	{sp|Q5NBT9|TPR1_ORYSJ; Protein TPR1 OS=Oryza sativa subsp. japonica GN=TPR1 PE=1 SV=1}	{nnu:104598875; - - - - -}	{At3g16830; KOG0266 WD40 repeat-containing protein R General function prediction only ;}	{GO:0005515; protein binding; molecular_function}	{XM_010261147.1; PREDICTED: Nelumbo nucifera protein TPR1 (LOC104598875), transcript variant X3, mRNA}	{PF00400:WD domain, G-beta repeat}
transcript_HQ_HBZL_transcript10392/f5p0/2018	2018	623	0	0	0	0	18.23	0	0	0	0	{XP_010276202.1; PREDICTED: pre-mRNA-processing factor 19-like [Nelumbo nucifera]}	{sp|Q9AV81|PRP19_ORYSJ; Pre-mRNA-processing factor 19 OS=Oryza sativa subsp. japonica GN=PRP19 PE=2 SV=1}	{egu:105044183; K10599 PRPF19, PRP19 pre-mRNA-processing factor 19 2.3.2.27 ko03040; Genetic Information Processing; Transcription; Spliceosome | ko04120; Genetic Information Processing; Folding, sorting and degradation; Ubiquitin mediated proteolysis}	{At1g04510; KOG0289 mRNA splicing factor R General function prediction only ;}	{GO:0016567; protein ubiquitination; biological_process GO:0005515; protein binding; molecular_function GO:0004842; ubiquitin-protein ligase activity; molecular_function GO:0008270; zinc ion binding; molecular_function}	{XM_010277900.2; PREDICTED: Nelumbo nucifera pre-mRNA-processing factor 19-like (LOC104611002), mRNA}	{PF11789:Zinc-finger of the MIZ type in Nse subunit PF00400:WD domain, G-beta repeat PF04564:U-box domain}
transcript_HQ_HBZL_transcript10393/f2p0/2006	2006	239	0	18.96	30.82	46.2	7.04	0	0.56	1.02	1.4	{XP_002282287.1; PREDICTED: dihydrolipoyllysine-residue acetyltransferase component 4 of pyruvate dehydrogenase complex, chloroplastic [Vitis vinifera]}	{sp|Q9SQI8|ODP24_ARATH; Dihydrolipoyllysine-residue acetyltransferase component 4 of pyruvate dehydrogenase complex, chloroplastic OS=Arabidopsis thaliana GN=LTA2 PE=2 SV=1}	{vvi:100261197; K00627 DLAT, aceF, pdhC pyruvate dehydrogenase E2 component (dihydrolipoamide acetyltransferase) 2.3.1.12 ko01200; Metabolism; Global and overview maps; Carbon metabolism | ko00010; Metabolism; Carbohydrate metabolism; Glycolysis / Gluconeogenesis | ko00020; Metabolism; Carbohydrate metabolism; Citrate cycle (TCA cycle) | ko00620; Metabolism; Carbohydrate metabolism; Pyruvate meta…	{At3g25860; KOG0557 Dihydrolipoamide acetyltransferase C Energy production and conversion ;}	{GO:0016746; transferase activity, transferring acyl groups; molecular_function GO:0008152; NA}	{XM_002529075.2; PREDICTED: Ricinus communis dihydrolipoyllysine-residue acetyltransferase component 4 of pyruvate dehydrogenase complex, chloroplastic (LOC8269690), mRNA}	{PF00198:2-oxoacid dehydrogenases acyltransferase (catalytic domain) PF02817:e3 binding domain}
transcript_HQ_HBZL_transcript10398/f2p0/2003	2003	513.59	0	0	0	0	15.15	0	0	0	0	{XP_010242637.1; PREDICTED: uncharacterized protein LOC104586931 [Nelumbo nucifera]}	{NA}	{nnu:104587823; - - - - -}	{NA}	{NA}	{NA}	{NA}
transcript_HQ_HBZL_transcript10399/f4p0/2001	2001	295.29	2	0	0	0	8.72	0.06	0	0	0	{XP_010931973.2; PREDICTED: LOW QUALITY PROTEIN: probable disease resistance protein At1g61180 [Elaeis guineensis]}	{sp|O81825|DRL28_ARATH; Probable disease resistance protein At4g27220 OS=Arabidopsis thaliana GN=At4g27220 PE=2 SV=1}	{egu:105052738; K13459 RPS2 disease resistance protein RPS2 - ko04626; Organismal Systems; Environmental adaptation; Plant-pathogen interaction}	{At4g27220; KOG4658 Apoptotic ATPase T Signal transduction mechanisms ;}	{GO:0005515; protein binding; molecular_function GO:0043531; ADP binding; molecular_function GO:0005524; ATP binding; molecular_function GO:0016887; ATPase activity; molecular_function}	{NA}	{PF13855:Leucine rich repeat PF00931:NB-ARC domain PF07728:AAA domain (dynein-related subfamily)}
transcript_HQ_HBZL_transcript1039/f7p0/3749	3749	950	1	1.56	0	1.99	14.1	0.01	0.02	0	0.03	{XP_007213715.1; hypothetical protein PRUPE_ppa000514mg [Prunus persica]}	{sp|Q755J9|VPS27_ASHGO; Vacuolar protein sorting-associated protein 27 OS=Ashbya gossypii (strain ATCC 10895 / CBS 109.51 / FGSC 9923 / NRRL Y-1056) GN=VPS27 PE=3 SV=1}	{cann:107859501; - - - - -}	{At1g61690; KOG1818 Membrane trafficking and cell signaling protein HRS, contains VHS and FYVE domains TU Signal transduction mechanisms ; Intracellular trafficking, secretion, and vesicular transport ;}	{GO:0005515; protein binding; molecular_function GO:0007034; vacuolar transport; biological_process GO:0042802; identical protein binding; molecular_function GO:0046872; metal ion binding; molecular_function}	{XM_006365810.2; PREDICTED: Solanum tuberosum uncharacterized LOC102599362 (LOC102599362), mRNA}	{PF00515:Tetratricopeptide repeat PF03357:Snf7 PF07721:Tetratricopeptide repeat PF01363:FYVE zinc finger}
transcript_HQ_HBZL_transcript103/f2p0/5886	5869	148.14	4	3.01	17	16.62	1.37	0.04	0.03	0.18	0.16	{XP_010264378.1; PREDICTED: splicing factor 1 [Nelumbo nucifera]}	{sp|Q8NIW7|BBP_NEUCR; Branchpoint-bridging protein OS=Neurospora crassa (strain ATCC 24698 / 74-OR23-1A / CBS 708.71 / DSM 1257 / FGSC 987) GN=bbp-1 PE=3 SV=1}	{cic:CICLE_v10004301mg; K13095 SF1 splicing factor 1 - -}	{At5g51300; KOG0119 Splicing factor 1/branch point binding protein (RRM superfamily) A RNA processing and modification ;}	{GO:0003723; RNA binding; molecular_function GO:0005515; protein binding; molecular_function GO:0003676; nucleic acid binding; molecular_function GO:0008270; zinc ion binding; molecular_function}	{XM_009376191.2; PREDICTED: Pyrus x bretschneideri branchpoint-bridging protein-like (LOC103963381), mRNA}	{PF00076:RNA recognition motif. (a.k.a. RRM, RBD, or RNP domain) PF00013:KH domain PF16866:PHD-finger PF00098:Zinc knuckle}
transcript_HQ_HBZL_transcript10400/f2p0/2013	2013	0	0	0	0	0	0	0	0	0	0	{ONI15676.1; hypothetical protein PRUPE_3G054800 [Prunus persica]}	{sp|Q940K0|DRL15_ARATH; Probable disease resistance protein At1g61180 OS=Arabidopsis thaliana GN=At1g61180 PE=2 SV=2}	{cit:102629499; - - - - -}	{At1g61180; KOG4658 Apoptotic ATPase T Signal transduction mechanisms ;}	{GO:0005515; protein binding; molecular_function}	{NA}	{PF13855:Leucine rich repeat}
transcript_HQ_HBZL_transcript10401/f3p0/2002	2002	1537.66	42.09	47.19	29.04	24.34	45.4	1.18	1.39	0.97	0.74	{XP_019051464.1; PREDICTED: receptor-like cytosolic serine/threonine-protein kinase RBK2 isoform X1 [Nelumbo nucifera]}	{sp|Q8RXC8|RBK2_ARATH; Receptor-like cytosolic serine/threonine-protein kinase RBK2 OS=Arabidopsis thaliana GN=RBK2 PE=1 SV=1}	{pda:103707537; - - - - -}	{At5g18910; KOG1187 Serine/threonine protein kinase T Signal transduction mechanisms ;}	{GO:0004672; protein kinase activity; molecular_function GO:0006468; protein phosphorylation; biological_process GO:0005524; ATP binding; molecular_function}	{XR_904335.1; PREDICTED: Fragaria vesca subsp. vesca receptor-like cytosolic serine/threonine-protein kinase RBK2 (LOC101303179), transcript variant X2, misc_RNA}	{PF07714:Protein tyrosine kinase PF00069:Protein kinase domain}
transcript_HQ_HBZL_transcript10402/f2p0/1999	1999	28.49	0	1	0	0	0.84	0	0.03	0	0	{XP_010258792.1; PREDICTED: dihydrolipoyllysine-residue succinyltransferase component of 2-oxoglutarate dehydrogenase complex 2, mitochondrial-like [Nelumbo nucifera]}	{sp|Q9FLQ4|ODO2A_ARATH; Dihydrolipoyllysine-residue succinyltransferase component of 2-oxoglutarate dehydrogenase complex 1, mitochondrial OS=Arabidopsis thaliana GN=At5g55070 PE=1 SV=1}	{nnu:104598431; K00658 DLST, sucB 2-oxoglutarate dehydrogenase E2 component (dihydrolipoamide succinyltransferase) 2.3.1.61 ko01200; Metabolism; Global and overview maps; Carbon metabolism | ko00020; Metabolism; Carbohydrate metabolism; Citrate cycle (TCA cycle) | ko00310; Metabolism; Amino acid metabolism; Lysine degradation}	{At5g55070; KOG0559 Dihydrolipoamide succinyltransferase (2-oxoglutarate dehydrogenase, E2 subunit) C Energy production and conversion ;}	{GO:0006213; pyrimidine nucleoside metabolic process; biological_process GO:0016746; transferase activity, transferring acyl groups; molecular_function GO:0016763; transferase activity, transferring pentosyl groups; molecular_function GO:0008152; NA}	{XM_010246181.2; PREDICTED: Nelumbo nucifera dihydrolipoyllysine-residue succinyltransferase component of 2-oxoglutarate dehydrogenase complex 2, mitochondrial-like (LOC104588306), transcript variant X3, mRNA}	{PF07831:Pyrimidine nucleoside phosphorylase C-terminal domain PF00198:2-oxoacid dehydrogenases acyltransferase (catalytic domain)}
transcript_HQ_HBZL_transcript10403/f5p0/2036	2036	1657.85	0	0	0.65	0	48.02	0	0	0.02	0	{XP_010248854.1; PREDICTED: glucose-6-phosphate 1-dehydrogenase, cytoplasmic isoform [Nelumbo nucifera]}	{sp|P37830|G6PD_SOLTU; Glucose-6-phosphate 1-dehydrogenase, cytoplasmic isoform OS=Solanum tuberosum GN=G6PDH PE=2 SV=1}	{cit:102608770; K00036 G6PD, zwf glucose-6-phosphate 1-dehydrogenase [EC:1.1.1.49 1.1.1.363] 1.1.1.49,1.1.1.363 ko01200; Metabolism; Global and overview maps; Carbon metabolism | ko00030; Metabolism; Carbohydrate metabolism; Pentose phosphate pathway | ko00480; Metabolism; Metabolism of other amino acids; Glutathione metabolism | ko05230; Human Diseases; Cancers: Overview; Central carbon metaboli…	{At5g40760; KOG0563 Glucose-6-phosphate 1-dehydrogenase G Carbohydrate transport and metabolism ;}	{GO:0004345; glucose-6-phosphate dehydrogenase activity; molecular_function GO:0006006; glucose metabolic process; biological_process GO:0050661; NADP binding; molecular_function GO:0055114; oxidation-reduction process; biological_process}	{XM_010250554.2; PREDICTED: Nelumbo nucifera glucose-6-phosphate 1-dehydrogenase, cytoplasmic isoform (LOC104591632), transcript variant X3, mRNA}	{PF02781:Glucose-6-phosphate dehydrogenase, C-terminal domain PF00479:Glucose-6-phosphate dehydrogenase, NAD binding domain}
transcript_HQ_HBZL_transcript10409/f5p0/2008	2008	1276.2	0	1	2	11.01	37.55	0	0.03	0.07	0.33	{XP_010243195.1; PREDICTED: NAC domain-containing protein 53-like isoform X1 [Nelumbo nucifera]}	{sp|Q949N0|NAC53_ARATH; NAC domain-containing protein 53 OS=Arabidopsis thaliana GN=NAC053 PE=2 SV=1}	{vvi:100242836; - - - - -}	{NA}	{GO:0003677; DNA binding; molecular_function GO:0006355; regulation of transcription, DNA-dependent; biological_process}	{XM_010268966.2; PREDICTED: Nelumbo nucifera NAC domain-containing protein 53 (LOC104604566), mRNA}	{PF02365:No apical meristem (NAM) protein}
transcript_HQ_HBZL_transcript10411/f2p0/2007	2006	263	0	0	0	0	7.75	0	0	0	0	{XP_010271513.1; PREDICTED: glutaredoxin-C3 [Nelumbo nucifera]}	{sp|Q6H628|GRXS6_ORYSJ; Monothiol glutaredoxin-S6 OS=Oryza sativa subsp. japonica GN=GRXS6 PE=2 SV=1}	{fve:101311508; - - - - -}	{At1g77370; KOG1752 Glutaredoxin and related proteins O Posttranslational modification, protein turnover, chaperones ;}	{GO:0005515; protein binding; molecular_function GO:0009055; NA GO:0015035; protein disulfide oxidoreductase activity; molecular_function GO:0045454; cell redox homeostasis; biological_process}	{XM_012223000.1; PREDICTED: Jatropha curcas glutaredoxin-C3 (LOC105639064), mRNA}	{PF13409:Glutathione S-transferase, N-terminal domain PF00462:Glutaredoxin PF01323:DSBA-like thioredoxin domain}
transcript_HQ_HBZL_transcript10412/f7p0/2008	2008	3129.12	0	0	0	4	92.07	0	0	0	0.12	{XP_012074070.1; PREDICTED: 4-coumarate--CoA ligase 2-like [Jatropha curcas]}	{sp|O24145|4CL1_TOBAC; 4-coumarate--CoA ligase 1 OS=Nicotiana tabacum GN=4CL1 PE=2 SV=1}	{jcu:105635600; K01904 4CL 4-coumarate--CoA ligase 6.2.1.12 ko00360; Metabolism; Amino acid metabolism; Phenylalanine metabolism | ko00130; Metabolism; Metabolism of cofactors and vitamins; Ubiquinone and other terpenoid-quinone biosynthesis | ko00940; Metabolism; Biosynthesis of other secondary metabolites; Phenylpropanoid biosynthesis}	{At1g51680; KOG1176 Acyl-CoA synthetase I Lipid transport and metabolism ;}	{GO:0008152; NA GO:0003824; NA}	{XM_006366215.2; PREDICTED: Solanum tuberosum 4-coumarate--CoA ligase 2 (LOC102584603), mRNA}	{PF00501:AMP-binding enzyme}
transcript_HQ_HBZL_transcript10413/f2p0/2010	2010	488.6	0	0	0	0	14.36	0	0	0	0	{XP_010263494.1; PREDICTED: probable E3 ubiquitin-protein ligase HIP1 isoform X2 [Nelumbo nucifera]}	{sp|Q7XTV7|HIP1_ORYSJ; Probable E3 ubiquitin-protein ligase HIP1 OS=Oryza sativa subsp. japonica GN=HIP1 PE=1 SV=2}	{nnu:104606634; - - - - -}	{At4g34040; KOG0800 FOG: Predicted E3 ubiquitin ligase O Posttranslational modification, protein turnover, chaperones ;}	{GO:0046872; metal ion binding; molecular_function GO:0004842; ubiquitin-protein ligase activity; molecular_function GO:0042128; nitrate assimilation; biological_process GO:0008270; zinc ion binding; molecular_function GO:0003677; DNA binding; molecular_function GO:0005634; nucleus; cellular_component GO:0005680; anaphase-promoting complex; cellular_component GO:0005515; protein binding; molecula…	{XM_018966754.1; PREDICTED: Juglans regia probable E3 ubiquitin-protein ligase RHG1A (LOC108992256), transcript variant X2, mRNA}	{PF12678:RING-H2 zinc finger domain PF12861:Anaphase-promoting complex subunit 11 RING-H2 finger PF17123:RING-like zinc finger PF00097:Zinc finger, C3HC4 type (RING finger) PF14634:zinc-RING finger domain PF13639:Ring finger domain PF07573:Nitrogen regulatory protein AreA N terminus}
transcript_HQ_HBZL_transcript10414/f2p0/2019	2019	922.32	3	0.01	10	9.51	26.97	0.08	0	0.33	0.29	{XP_010252080.1; PREDICTED: serine/threonine-protein kinase HT1 [Nelumbo nucifera]}	{sp|Q2MHE4|HT1_ARATH; Serine/threonine-protein kinase HT1 OS=Arabidopsis thaliana GN=HT1 PE=1 SV=1}	{nnu:104593781; - - - - -}	{At5g01850; KOG0192 Tyrosine kinase specific for activated (GTP-bound) p21cdc42Hs T Signal transduction mechanisms ;}	{GO:0016020; membrane; cellular_component GO:0006468; protein phosphorylation; biological_process GO:0004672; protein kinase activity; molecular_function GO:0016773; phosphotransferase activity, alcohol group as acceptor; molecular_function GO:0005524; ATP binding; molecular_function}	{XM_010254807.2; PREDICTED: Nelumbo nucifera serine/threonine-protein kinase HT1-like (LOC104594506), transcript variant X3, mRNA}	{PF06293:Lipopolysaccharide kinase (Kdo/WaaP) family PF05445:Poxvirus serine/threonine protein kinase PF00069:Protein kinase domain PF07714:Protein tyrosine kinase}
transcript_HQ_HBZL_transcript10415/f16p0/2004	2004	1407.33	0	0	3.03	3.27	41.5	0	0	0.1	0.1	{EOY00247.1; CW14 protein isoform 1 [Theobroma cacao]}	{NA}	{vvi:100260447; - - - - -}	{NA}	{NA}	{XM_010257431.2; PREDICTED: Nelumbo nucifera uncharacterized LOC104596338 (LOC104596338), transcript variant X1, mRNA}	{NA}
transcript_HQ_HBZL_transcript10418/f6p0/2016	2016	290	27.98	52.36	4.62	0	8.49	0.78	1.53	0.15	0	{XP_010269571.1; PREDICTED: magnesium/proton exchanger [Nelumbo nucifera]}	{sp|O22252|MHX_ARATH; Magnesium/proton exchanger OS=Arabidopsis thaliana GN=MHX PE=2 SV=3}	{rcu:8259876; K03452 MHX magnesium/proton exchanger - -}	{At2g47600; KOG1306 Ca2+/Na+ exchanger NCX1 and related proteins PT Inorganic ion transport and metabolism ; Signal transduction mechanisms ;}	{GO:0016021; integral to membrane; cellular_component GO:0055085; transmembrane transport; biological_process}	{XM_010271271.2; PREDICTED: Nelumbo nucifera magnesium/proton exchanger (LOC104606183), transcript variant X2, mRNA}	{PF01699:Sodium/calcium exchanger protein}
transcript_HQ_HBZL_transcript10419/f8p0/2008	2008	2099	39.57	15.33	1.89	3	61.76	1.1	0.45	0.06	0.09	{XP_010255317.1; PREDICTED: uncharacterized protein LOC104596031 [Nelumbo nucifera]}	{sp|Q9SRE5|Y1666_ARATH; Uncharacterized protein At1g76660 OS=Arabidopsis thaliana GN=At1g76660 PE=2 SV=1}	{nnu:104596031; - - - - -}	{NA}	{NA}	{XM_007040221.2; PREDICTED: Theobroma cacao uncharacterized LOC18606547 (LOC18606547), mRNA}	{NA}
transcript_HQ_HBZL_transcript1041/f2p0/3747	3747	1291.66	557.44	119.59	0	0	19.18	7.83	1.77	0	0	{XP_010273722.1; PREDICTED: protein RRC1-like isoform X2 [Nelumbo nucifera]}	{sp|Q9C5J3|RRC1_ARATH; Protein RRC1 OS=Arabidopsis thaliana GN=RRC1 PE=1 SV=1}	{var:108343061; K12842 SR140 U2-associated protein SR140 - ko03040; Genetic Information Processing; Transcription; Spliceosome}	{At5g25060; KOG0151 Predicted splicing regulator, contains RRM, SWAP and RPR domains R General function prediction only ;}	{GO:0003723; RNA binding; molecular_function GO:0006396; RNA processing; biological_process GO:0003676; nucleic acid binding; molecular_function}	{XM_010275420.2; PREDICTED: Nelumbo nucifera protein RRC1-like (LOC104609179), transcript variant X2, mRNA}	{PF16367:RNA recognition motif PF00076:RNA recognition motif. (a.k.a. RRM, RBD, or RNP domain) PF01805:Surp module}
transcript_HQ_HBZL_transcript10420/f77p0/1990	1990	3748.46	0	0	0	0	111.42	0	0	0	0	{XP_002274807.1; PREDICTED: molybdate-anion transporter [Vitis vinifera]}	{sp|Q6N075|MFSD5_HUMAN; Molybdate-anion transporter OS=Homo sapiens GN=MFSD5 PE=1 SV=2}	{nnu:104594068; - - - - -}	{At1g64650; KOG4332 Predicted sugar transporter G Carbohydrate transport and metabolism ;}	{GO:0055085; transmembrane transport; biological_process GO:0015098; molybdate ion transmembrane transporter activity; molecular_function GO:0016021; integral to membrane; cellular_component GO:0015689; molybdate ion transport; biological_process}	{XM_010254194.2; PREDICTED: Nelumbo nucifera molybdate-anion transporter-like (LOC104594068), mRNA}	{PF07690:Major Facilitator Superfamily PF05631:Sugar-tranasporters, 12 TM}
transcript_HQ_HBZL_transcript10423/f3p0/2051	2051	1929.04	0	0	0	0	55.41	0	0	0	0	{XP_006492249.1; PREDICTED: citrate synthase, glyoxysomal [Citrus sinensis]}	{sp|P49299|CYSZ_CUCMA; Citrate synthase, glyoxysomal OS=Cucurbita maxima PE=1 SV=1}	{vvi:100255795; K01647 CS, gltA citrate synthase 2.3.3.1 ko01200; Metabolism; Global and overview maps; Carbon metabolism | ko01210; Metabolism; Global and overview maps; 2-Oxocarboxylic acid metabolism | ko01230; Metabolism; Global and overview maps; Biosynthesis of amino acids | ko00020; Metabolism; Carbohydrate metabolism; Citrate cycle (TCA cycle) | ko00630; Metabolism; Carbohydrate metabolis…	{At3g58750; KOG2617 Citrate synthase C Energy production and conversion ;}	{GO:0046912; transferase activity, transferring acyl groups, acyl groups converted into alkyl on transfer; molecular_function}	{XM_018958695.1; PREDICTED: Juglans regia citrate synthase, glyoxysomal (LOC108986174), mRNA}	{PF00285:Citrate synthase, C-terminal domain}
transcript_HQ_HBZL_transcript10424/f2p0/2024	2024	134.96	0	4.98	6.05	4.1	3.94	0	0.15	0.2	0.12	{GAV60276.1; Pribosyltran domain-containing protein/GATase_7 domain-containing protein [Cephalotus follicularis]}	{sp|Q9SI61|ASE1_ARATH; Amidophosphoribosyltransferase 1, chloroplastic OS=Arabidopsis thaliana GN=ASE1 PE=2 SV=1}	{bvg:104886844; K00764 purF, PPAT amidophosphoribosyltransferase 2.4.2.14 ko00230; Metabolism; Nucleotide metabolism; Purine metabolism | ko00250; Metabolism; Amino acid metabolism; Alanine, aspartate and glutamate metabolism}	{At2g16570; KOG0572 Glutamine phosphoribosylpyrophosphate amidotransferase F Nucleotide transport and metabolism ;}	{GO:0009116; nucleoside metabolic process; biological_process GO:0006810; transport; biological_process}	{XM_010278569.2; PREDICTED: Nelumbo nucifera amidophosphoribosyltransferase, chloroplastic-like (LOC104611486), mRNA}	{PF00156:Phosphoribosyl transferase domain PF11382:Copper transport outer membrane protein, MctB}
transcript_HQ_HBZL_transcript10426/f3p0/2006	2005	282.6	0	0	0	2	8.33	0	0	0	0.06	{XP_007223289.1; hypothetical protein PRUPE_ppa005562mg [Prunus persica]}	{sp|Q93ZD7|MRS24_ARATH; Magnesium transporter MRS2-4 OS=Arabidopsis thaliana GN=MRS2-4 PE=2 SV=1}	{pmum:103319040; K16075 MRS2, MFM1 magnesium transporter - -}	{At3g58970; KOG2662 Magnesium transporters: CorA family P Inorganic ion transport and metabolism ;}	{GO:0046873; metal ion transmembrane transporter activity; molecular_function GO:0055085; transmembrane transport; biological_process GO:0016020; membrane; cellular_component GO:0030001; metal ion transport; biological_process}	{XM_016023460.1; PREDICTED: Ziziphus jujuba magnesium transporter MRS2-4 (LOC107415174), transcript variant X2, mRNA}	{PF01544:CorA-like Mg2+ transporter protein}
transcript_HQ_HBZL_transcript10428/f2p0/2080	2080	580	2	0	0	4.44	16.4	0.05	0	0	0.13	{XP_010244884.1; PREDICTED: NEDD8 ultimate buster 1 [Nelumbo nucifera]}	{sp|Q9Y5A7|NUB1_HUMAN; NEDD8 ultimate buster 1 OS=Homo sapiens GN=NUB1 PE=1 SV=2}	{vvi:100246604; - - - - -}	{At2g12550; KOG2561 Adaptor protein NUB1, contains UBA domain OT Posttranslational modification, protein turnover, chaperones ; Signal transduction mechanisms ;}	{GO:0005515; protein binding; molecular_function GO:0009378; four-way junction helicase activity; molecular_function GO:0006310; DNA recombination; biological_process GO:0009379; Holliday junction helicase complex; cellular_component GO:0005524; ATP binding; molecular_function GO:0006281; DNA repair; biological_process}	{XM_002268957.4; PREDICTED: Vitis vinifera NEDD8 ultimate buster 1 (LOC100246604), mRNA}	{PF07499:RuvA, C-terminal domain PF00240:Ubiquitin family}
transcript_HQ_HBZL_transcript1042/f5p0/3753	3753	1136.37	289.26	64.56	22.21	21.6	16.84	4.06	0.96	0.37	0.33	{XP_010259142.1; PREDICTED: ETO1-like protein 1 [Nelumbo nucifera]}	{sp|Q9ZQX6|ETOL1_ARATH; ETO1-like protein 1 OS=Arabidopsis thaliana GN=EOL1 PE=1 SV=1}	{nnu:104598664; - - - - -}	{NA}	{GO:0005515; protein binding; molecular_function}	{XM_010260840.2; PREDICTED: Nelumbo nucifera ETO1-like protein 1 (LOC104598664), mRNA}	{PF13176:Tetratricopeptide repeat PF00515:Tetratricopeptide repeat PF13181:Tetratricopeptide repeat PF13371:Tetratricopeptide repeat PF13374:Tetratricopeptide repeat PF00651:BTB/POZ domain PF13414:TPR repeat}
transcript_HQ_HBZL_transcript10431/f10p0/1949	1949	2354	159.29	367.14	617.23	775.91	71.65	4.59	11.16	21.17	24.38	{KVI05281.1; 6-phosphogluconate dehydrogenase, C-terminal [Cynara cardunculus var. scolymus]}	{sp|Q9FWA3|6GPD3_ARATH; 6-phosphogluconate dehydrogenase, decarboxylating 3 OS=Arabidopsis thaliana GN=At3g02360 PE=2 SV=1}	{nnu:104597825; K00033 PGD, gnd, gntZ 6-phosphogluconate dehydrogenase [EC:1.1.1.44 1.1.1.343] 1.1.1.44,1.1.1.343 ko01200; Metabolism; Global and overview maps; Carbon metabolism | ko00030; Metabolism; Carbohydrate metabolism; Pentose phosphate pathway | ko00480; Metabolism; Metabolism of other amino acids; Glutathione metabolism}	{At3g02360; KOG2653 6-phosphogluconate dehydrogenase G Carbohydrate transport and metabolism ;}	{GO:0055114; oxidation-reduction process; biological_process GO:0004616; phosphogluconate dehydrogenase (decarboxylating) activity; molecular_function GO:0003857; 3-hydroxyacyl-CoA dehydrogenase activity; molecular_function GO:0006631; fatty acid metabolic process; biological_process GO:0006098; pentose-phosphate shunt; biological_process GO:0016491; oxidoreductase activity; molecular_function}	{XM_010263347.2; PREDICTED: Nelumbo nucifera 6-phosphogluconate dehydrogenase, decarboxylating 3-like (LOC104600406), transcript variant X2, mRNA}	{PF03446:NAD binding domain of 6-phosphogluconate dehydrogenase PF00393:6-phosphogluconate dehydrogenase, C-terminal domain PF02737:3-hydroxyacyl-CoA dehydrogenase, NAD binding domain}
transcript_HQ_HBZL_transcript10433/f3p0/2014	2014	118.33	15.82	21.34	18.58	15.92	3.47	0.44	0.63	0.61	0.48	{XP_010103622.1; Dihydroorotate dehydrogenase (quinone) [Morus notabilis]}	{sp|P32746|PYRD_ARATH; Dihydroorotate dehydrogenase (quinone), mitochondrial OS=Arabidopsis thaliana GN=PYRD PE=1 SV=2}	{vvi:100258316; K00254 DHODH, pyrD dihydroorotate dehydrogenase 1.3.5.2 ko00240; Metabolism; Nucleotide metabolism; Pyrimidine metabolism}	{At5g23300; KOG1436 Dihydroorotate dehydrogenase F Nucleotide transport and metabolism ;}	{GO:0055114; oxidation-reduction process; biological_process GO:0016627; oxidoreductase activity, acting on the CH-CH group of donors; molecular_function GO:0018580; nitronate monooxygenase activity; molecular_function GO:0005737; cytoplasm; cellular_component GO:0016491; oxidoreductase activity; molecular_function}	{XM_002267707.4; PREDICTED: Vitis vinifera dihydroorotate dehydrogenase (quinone), mitochondrial (LOC100258316), mRNA}	{PF01070:FMN-dependent dehydrogenase PF03060:Nitronate monooxygenase PF01180:Dihydroorotate dehydrogenase}
transcript_HQ_HBZL_transcript10437/f3p0/2009	2009	1847.7	0	0	0	0	54.33	0	0	0	0	{XP_010243196.1; PREDICTED: NAC domain-containing protein 53-like isoform X2 [Nelumbo nucifera]}	{sp|Q949N0|NAC53_ARATH; NAC domain-containing protein 53 OS=Arabidopsis thaliana GN=NAC053 PE=2 SV=1}	{vvi:100242836; - - - - -}	{NA}	{GO:0006355; regulation of transcription, DNA-dependent; biological_process GO:0003677; DNA binding; molecular_function}	{XM_013775391.1; PREDICTED: Brassica oleracea var. oleracea NAC domain-containing protein 53 (LOC106336537), mRNA}	{PF02365:No apical meristem (NAM) protein}
transcript_HQ_HBZL_transcript10439/f2p0/2004	2005	1799.18	1.69	1	0	0	53.03	0.05	0.03	0	0	{XP_018813183.1; PREDICTED: phosphoenolpyruvate carboxykinase [ATP]-like [Juglans regia]}	{sp|P49292|PCKA1_UROPA; Phosphoenolpyruvate carboxykinase (ATP) 1 OS=Urochloa panicoides GN=PCK1 PE=1 SV=1}	{gra:105787729; K01610 E4.1.1.49, pckA phosphoenolpyruvate carboxykinase (ATP) 4.1.1.49 ko01200; Metabolism; Global and overview maps; Carbon metabolism | ko00010; Metabolism; Carbohydrate metabolism; Glycolysis / Gluconeogenesis | ko00020; Metabolism; Carbohydrate metabolism; Citrate cycle (TCA cycle) | ko00620; Metabolism; Carbohydrate metabolism; Pyruvate metabolism | ko00710; Metabolism; Ener…	{NA}	{GO:0004612; phosphoenolpyruvate carboxykinase (ATP) activity; molecular_function GO:0005524; ATP binding; molecular_function GO:0006094; gluconeogenesis; biological_process}	{XM_007047618.2; PREDICTED: Theobroma cacao phosphoenolpyruvate carboxykinase [ATP] (LOC18611387), mRNA}	{PF01293:Phosphoenolpyruvate carboxykinase}
transcript_HQ_HBZL_transcript1043/f4p0/3700	3700	1569	0	0	0	0	23.61	0	0	0	0	{XP_010270965.1; PREDICTED: squamosa promoter-binding-like protein 1 [Nelumbo nucifera]}	{sp|Q9S7P5|SPL12_ARATH; Squamosa promoter-binding-like protein 12 OS=Arabidopsis thaliana GN=SPL12 PE=1 SV=1}	{pmum:103323282; - - - - -}	{NA}	{GO:0003677; DNA binding; molecular_function GO:0005634; nucleus; cellular_component GO:0005515; protein binding; molecular_function}	{XM_002320228.2; Populus trichocarpa hypothetical protein (POPTR_0014s10960g) mRNA, complete cds}	{PF13606:Ankyrin repeat PF03110:SBP domain}
transcript_HQ_HBZL_transcript10443/f2p0/2008	2006	168	0	0	0	0	4.95	0	0	0	0	{XP_015970486.1; PREDICTED: glucosamine 6-phosphate N-acetyltransferase [Arachis duranensis]}	{sp|Q9LFU9|GNA1_ARATH; Glucosamine 6-phosphate N-acetyltransferase OS=Arabidopsis thaliana GN=GNA1 PE=1 SV=1}	{cam:101510234; K00621 GNPNAT1, GNA1 glucosamine-phosphate N-acetyltransferase 2.3.1.4 ko00520; Metabolism; Carbohydrate metabolism; Amino sugar and nucleotide sugar metabolism}	{At5g15770; KOG3396 Glucosamine-phosphate N-acetyltransferase M Cell wall/membrane/envelope biogenesis ;}	{GO:0003676; nucleic acid binding; molecular_function GO:0008270; zinc ion binding; molecular_function GO:0008080; N-acetyltransferase activity; molecular_function}	{AC253955.1; Aquilegia coerulea clone COL08-M12, complete sequence}	{PF13673:Acetyltransferase (GNAT) domain PF00098:Zinc knuckle PF13508:Acetyltransferase (GNAT) domain PF00583:Acetyltransferase (GNAT) family}
transcript_HQ_HBZL_transcript10446/f3p0/1999	1999	675.56	0	0	1.64	1.01	19.98	0	0	0.05	0.03	{XP_010254980.1; PREDICTED: protein DA1-related 1-like [Nelumbo nucifera]}	{sp|P0C7Q8|DA1_ARATH; Protein DA1 OS=Arabidopsis thaliana GN=DA1 PE=1 SV=1}	{nnu:104595787; - - - - -}	{At1g19270; KOG1703 Adaptor protein Enigma and related PDZ-LIM proteins TZ Signal transduction mechanisms ; Cytoskeleton ;}	{GO:0008270; zinc ion binding; molecular_function}	{XM_010256679.2; PREDICTED: Nelumbo nucifera protein DA1-related 1-like (LOC104595787), transcript variant X2, mRNA}	{PF00412:LIM domain}
transcript_HQ_HBZL_transcript10448/f2p0/2082	2082	55.83	15	20.24	29.59	0	1.58	0.4	0.57	0.94	0	{CAN74505.1; hypothetical protein VITISV_015889 [Vitis vinifera]}	{sp|O80492|P2C05_ARATH; Probable protein phosphatase 2C 5 OS=Arabidopsis thaliana GN=At1g09160 PE=2 SV=1}	{nnu:104598868; - - - - -}	{At1g09160; KOG0698 Serine/threonine protein phosphatase T Signal transduction mechanisms ;}	{GO:0003824; NA}	{XM_012233561.1; PREDICTED: Jatropha curcas probable protein phosphatase 2C 5 (LOC105647458), transcript variant X3, mRNA}	{PF07228:Stage II sporulation protein E (SpoIIE) PF00481:Protein phosphatase 2C}
transcript_HQ_HBZL_transcript1044/f3p0/3719	3719	8780.32	0	0	0	0	131.4	0	0	0	0	{XP_010269772.1; PREDICTED: villin-2 [Nelumbo nucifera]}	{sp|O81645|VILI3_ARATH; Villin-3 OS=Arabidopsis thaliana GN=VLN3 PE=1 SV=2}	{gra:105788348; - - - - -}	{At2g41740; KOG0443 Actin regulatory proteins (gelsolin/villin family) Z Cytoskeleton ;}	{GO:0003779; actin binding; molecular_function GO:0006260; DNA replication; biological_process GO:0007010; cytoskeleton organization; biological_process GO:0005634; nucleus; cellular_component}	{XM_010271470.2; PREDICTED: Nelumbo nucifera villin-2 (LOC104606330), mRNA}	{PF09507:DNA polymerase subunit Cdc27 PF02209:Villin headpiece domain}
transcript_HQ_HBZL_transcript10450/f2p0/2014	2014	259	24	14	42	34	7.59	0.67	0.41	1.39	1.03	{XP_018818646.1; PREDICTED: VAN3-binding protein-like isoform X1 [Juglans regia]}	{sp|Q8W4K5|VAB_ARATH; VAN3-binding protein OS=Arabidopsis thaliana GN=VAB PE=1 SV=1}	{jcu:105632036; - - - - -}	{NA}	{GO:0016817; hydrolase activity, acting on acid anhydrides; molecular_function}	{XM_017371672.1; PREDICTED: Daucus carota subsp. sativus VAN3-binding protein-like (LOC108202998), mRNA}	{PF12300:Protein of unknown function (DUF3628)}
transcript_HQ_HBZL_transcript10453/f2p0/2007	2007	165.03	0	7	27.48	36.63	4.86	0	0.21	0.91	1.11	{XP_010251669.1; PREDICTED: ABSCISIC ACID-INSENSITIVE 5-like protein 2 [Nelumbo nucifera]}	{sp|Q9LES3|AI5L2_ARATH; ABSCISIC ACID-INSENSITIVE 5-like protein 2 OS=Arabidopsis thaliana GN=DPBF3 PE=1 SV=1}	{nnu:104593493; K14432 ABF ABA responsive element binding factor - ko04075; Environmental Information Processing; Signal transduction; Plant hormone signal transduction}	{NA}	{GO:0003700; sequence-specific DNA binding transcription factor activity; molecular_function GO:0043565; sequence-specific DNA binding; molecular_function GO:0006355; regulation of transcription, DNA-dependent; biological_process GO:0005634; nucleus; cellular_component GO:0003677; DNA binding; molecular_function}	{XM_018986857.1; PREDICTED: Juglans regia ABSCISIC ACID-INSENSITIVE 5-like protein 2 (LOC109007259), mRNA}	{PF01166:TSC-22/dip/bun family PF03131:bZIP Maf transcription factor PF00170:bZIP transcription factor PF07716:Basic region leucine zipper}
transcript_HQ_HBZL_transcript10456/f2p0/1997	1997	7578	0	0	0	0	224.36	0	0	0	0	{XP_012833969.1; PREDICTED: putative F-box/FBD/LRR-repeat protein At1g78760 isoform X3 [Erythranthe guttata]}	{NA}	{sly:104648888; - - - - -}	{NA}	{NA}	{NA}	{NA}
transcript_HQ_HBZL_transcript10459/f3p0/2009	2009	538.94	2	2	0	0	15.85	0.06	0.06	0	0	{XP_018828546.1; PREDICTED: WRKY transcription factor WRKY24-like isoform X2 [Juglans regia]}	{sp|Q8S8P5|WRK33_ARATH; Probable WRKY transcription factor 33 OS=Arabidopsis thaliana GN=WRKY33 PE=1 SV=2}	{egu:105044758; K13424 WRKY33 WRKY transcription factor 33 - ko04016; Environmental Information Processing; Signal transduction; MAPK signaling pathway - plant | ko04626; Organismal Systems; Environmental adaptation; Plant-pathogen interaction}	{NA}	{GO:0003700; sequence-specific DNA binding transcription factor activity; molecular_function GO:0043565; sequence-specific DNA binding; molecular_function GO:0006355; regulation of transcription, DNA-dependent; biological_process}	{XM_018986326.1; PREDICTED: Juglans regia probable WRKY transcription factor 33 (LOC109006899), mRNA}	{PF03106:WRKY DNA -binding domain}
transcript_HQ_HBZL_transcript1045/f2p0/3732	3735	846.7	74.61	45.41	32.64	37.7	12.61	1.05	0.68	0.55	0.58	{XP_010275899.1; PREDICTED: translation initiation factor IF-2, chloroplastic-like [Nelumbo nucifera]}	{sp|Q9SHI1|IF2C_ARATH; Translation initiation factor IF-2, chloroplastic OS=Arabidopsis thaliana GN=At1g17220 PE=2 SV=2}	{rcu:8278050; K02519 infB, MTIF2 translation initiation factor IF-2 - -}	{At1g17220; KOG1145 Mitochondrial translation initiation factor 2 (IF-2; GTPase) J Translation, ribosomal structure and biogenesis ;}	{GO:0005622; intracellular; cellular_component GO:0003924; GTPase activity; molecular_function GO:0007264; small GTPase mediated signal transduction; biological_process GO:0005840; ribosome; cellular_component GO:0003735; structural constituent of ribosome; molecular_function GO:0005525; GTP binding; molecular_function GO:0006412; translation; biological_process}	{XM_010276763.1; PREDICTED: Nelumbo nucifera translation initiation factor IF-2, chloroplastic-like (LOC104610238), mRNA}	{PF01926:50S ribosome-binding GTPase PF03144:Elongation factor Tu domain 2 PF01249:Ribosomal protein S21e PF00025:ADP-ribosylation factor family PF00071:Ras family PF08477:Ras of Complex, Roc, domain of DAPkinase PF03193:Protein of unknown function, DUF258}
transcript_HQ_HBZL_transcript10460/f3p0/2004	2004	585.06	0	17.23	29.37	43.39	17.25	0	0.51	0.98	1.32	{XP_010252889.1; PREDICTED: uncharacterized protein LOC104594334 isoform X5 [Nelumbo nucifera]}	{NA}	{nnu:104594334; - - - - -}	{NA}	{NA}	{XM_010254587.2; PREDICTED: Nelumbo nucifera uncharacterized LOC104594334 (LOC104594334), transcript variant X5, mRNA}	{NA}
transcript_HQ_HBZL_transcript10462/f5p0/2026	2026	676	0	4	6	1	19.69	0	0.12	0.2	0.03	{XP_007204565.1; hypothetical protein PRUPE_ppa003852mg [Prunus persica]}	{sp|O48711|PME12_ARATH; Probable pectinesterase/pectinesterase inhibitor 12 OS=Arabidopsis thaliana GN=PME12 PE=2 SV=1}	{pper:PRUPE_ppa003852mg; - - - - -}	{NA}	{GO:0030599; pectinesterase activity; molecular_function GO:0042545; cell wall modification; biological_process GO:0005618; cell wall; cellular_component GO:0004857; enzyme inhibitor activity; molecular_function}	{XM_006360584.2; PREDICTED: Solanum tuberosum probable pectinesterase/pectinesterase inhibitor 12 (LOC102584686), mRNA}	{PF01095:Pectinesterase PF04043:Plant invertase/pectin methylesterase inhibitor}
transcript_HQ_HBZL_transcript10467/f2p0/1988	1991	216	0	108.31	136.96	172.87	6.42	0	3.21	4.58	5.3	{XP_010261015.1; PREDICTED: TSL-kinase interacting protein 1-like [Nelumbo nucifera]}	{sp|Q8LJT8|TKI1_ARATH; TSL-kinase interacting protein 1 OS=Arabidopsis thaliana GN=TKI1 PE=1 SV=2}	{nnu:104599955; - - - - -}	{At2g36960; KOG4468 Polycomb-group transcriptional regulator K Transcription ;}	{NA}	{XM_008444476.2; PREDICTED: Cucumis melo TSL-kinase interacting protein 1 (LOC103486493), transcript variant X5, mRNA}	{NA}
transcript_HQ_HBZL_transcript1046/f2p0/3739	3739	812.62	0	0	0	0	12.09	0	0	0	0	{XP_010257066.2; PREDICTED: ubiquitin-activating enzyme E1 1 [Nelumbo nucifera]}	{sp|P31251|UBE12_WHEAT; Ubiquitin-activating enzyme E1 2 OS=Triticum aestivum GN=UBA2 PE=2 SV=1}	{nnu:104597299; K03178 UBE1, UBA1 ubiquitin-activating enzyme E1 6.2.1.45 ko04120; Genetic Information Processing; Folding, sorting and degradation; Ubiquitin mediated proteolysis | ko05012; Human Diseases; Neurodegenerative diseases; Parkinson's disease}	{At2g30110; KOG2012 Ubiquitin activating enzyme UBA1 O Posttranslational modification, protein turnover, chaperones ;}	{GO:0008641; small protein activating enzyme activity; molecular_function}	{XM_010258764.2; PREDICTED: Nelumbo nucifera ubiquitin-activating enzyme E1 1 (LOC104597299), mRNA}	{PF00899:ThiF family}
transcript_HQ_HBZL_transcript10471/f2p0/1988	1988	741	0	1	0	0	22.05	0	0.03	0	0	{XP_004961035.1; PREDICTED: plasminogen activator inhibitor 1 RNA-binding protein-like [Setaria italica]}	{NA}	{sita:101770806; K13199 SERBP1 plasminogen activator inhibitor 1 RNA-binding protein - -}	{NA}	{NA}	{NA}	{NA}
transcript_HQ_HBZL_transcript10472/f2p0/2027	2027	158	1.15	14.07	14.78	45.86	4.6	0.03	0.41	0.48	1.38	{XP_010250059.1; PREDICTED: adenine nucleotide transporter BT1, chloroplastic/mitochondrial [Nelumbo nucifera]}	{sp|Q9SUV1|BRT1_ARATH; Adenine nucleotide transporter BT1, chloroplastic/mitochondrial OS=Arabidopsis thaliana GN=BT1 PE=1 SV=1}	{nnu:104592402; - - - - -}	{At4g32400; KOG0752 Mitochondrial solute carrier protein C Energy production and conversion ;}	{NA}	{XM_006475762.2; PREDICTED: Citrus sinensis adenine nucleotide transporter BT1, chloroplastic/mitochondrial (LOC102624496), mRNA}	{NA}
transcript_HQ_HBZL_transcript10475/f8p0/1994	1994	4344	0	0	7	8	128.83	0	0	0.23	0.24	{XP_010278545.1; PREDICTED: BAG family molecular chaperone regulator 3 [Nelumbo nucifera]}	{sp|Q0WUQ1|BAG1_ARATH; BAG family molecular chaperone regulator 1 OS=Arabidopsis thaliana GN=BAG1 PE=1 SV=1}	{sind:105160517; - - - - -}	{At5g52060; KOG4361 BCL2-associated athanogene-like proteins and related BAG family chaperone regulators T Signal transduction mechanisms ;}	{GO:0051087; chaperone binding; molecular_function GO:0019901; protein kinase binding; molecular_function GO:0005515; protein binding; molecular_function}	{XM_006421792.1; Citrus clementina hypothetical protein (CICLE_v10005288mg) mRNA, complete cds}	{PF02179:BAG domain PF14560:Ubiquitin-like domain PF00240:Ubiquitin family PF15898:cGMP-dependent protein kinase interacting domain}
transcript_HQ_HBZL_transcript1047/f3p0/3739	3739	217	0	0	0	0	3.23	0	0	0	0	{XP_010249931.1; PREDICTED: uncharacterized protein LOC104592322 [Nelumbo nucifera]}	{NA}	{nnu:104592322; - - - - -}	{NA}	{NA}	{XM_009409368.2; PREDICTED: Musa acuminata subsp. malaccensis uncharacterized LOC103990287 (LOC103990287), mRNA}	{NA}
transcript_HQ_HBZL_transcript10483/f2p0/1996	1994	77.72	0	4	2	1	2.31	0	0.12	0.07	0.03	{XP_010247057.1; PREDICTED: uncharacterized RING finger protein C548.05c-like isoform X1 [Nelumbo nucifera]}	{NA}	{NA}	{NA}	{NA}	{NA}	{NA}
transcript_HQ_HBZL_transcript10485/f3p0/2008	2008	1545.1	0	0	2.02	3.36	45.46	0	0	0.07	0.1	{XP_006465804.1; PREDICTED: alanine aminotransferase 2, mitochondrial-like [Citrus sinensis]}	{sp|F4I7I0|ALAT1_ARATH; Alanine aminotransferase 1, mitochondrial OS=Arabidopsis thaliana GN=ALAAT1 PE=1 SV=1}	{cit:102620489; K00814 GPT, ALT alanine transaminase 2.6.1.2 ko01200; Metabolism; Global and overview maps; Carbon metabolism | ko01210; Metabolism; Global and overview maps; 2-Oxocarboxylic acid metabolism | ko01230; Metabolism; Global and overview maps; Biosynthesis of amino acids | ko00710; Metabolism; Energy metabolism; Carbon fixation in photosynthetic organisms | ko00250; Metabolism; Amino …	{At1g72330; KOG0258 Alanine aminotransferase E Amino acid transport and metabolism ;}	{GO:0030170; pyridoxal phosphate binding; molecular_function GO:0006520; cellular amino acid metabolic process; biological_process GO:0009058; biosynthetic process; biological_process GO:0016829; lyase activity; molecular_function}	{XM_010275507.1; PREDICTED: Nelumbo nucifera alanine aminotransferase 2-like (LOC104609254), mRNA}	{PF01212:Beta-eliminating lyase PF00155:Aminotransferase class I and II}
transcript_HQ_HBZL_transcript10486/f15p0/1946	1946	2584	13.56	5.04	0	0	78.79	0.39	0.15	0	0	{XP_010254116.1; PREDICTED: uncharacterized protein LOC104595195 [Nelumbo nucifera]}	{sp|P51228|CFXQ_PORPU; Protein CfxQ homolog OS=Porphyra purpurea GN=cfxQ PE=3 SV=1}	{nnu:104595195; - - - - -}	{At3g24530; KOG0730 AAA+-type ATPase O Posttranslational modification, protein turnover, chaperones ;}	{GO:0008134; transcription factor binding; molecular_function GO:0006281; DNA repair; biological_process GO:0006310; DNA recombination; biological_process GO:0009378; four-way junction helicase activity; molecular_function GO:0005515; protein binding; molecular_function GO:0006355; regulation of transcription, DNA-dependent; biological_process GO:0005524; ATP binding; molecular_function GO:001688…	{XM_010255814.2; PREDICTED: Nelumbo nucifera ESX-1 secretion system protein EccA1-like (LOC104595195), mRNA}	{PF13606:Ankyrin repeat PF07728:AAA domain (dynein-related subfamily) PF07724:AAA domain (Cdc48 subfamily) PF00004:ATPase family associated with various cellular activities (AAA) PF05496:Holliday junction DNA helicase ruvB N-terminus PF00023:Ankyrin repeat PF00158:Sigma-54 interaction domain}
transcript_HQ_HBZL_transcript10489/f2p0/2004	2004	748	678.2	116.48	8.89	28.64	22.06	18.93	3.43	0.3	0.87	{XP_002512941.1; PREDICTED: diaminopimelate decarboxylase 1, chloroplastic [Ricinus communis]}	{sp|Q949X7|DCDA1_ARATH; Diaminopimelate decarboxylase 1, chloroplastic OS=Arabidopsis thaliana GN=LYSA1 PE=1 SV=1}	{jcu:105630136; K01586 lysA diaminopimelate decarboxylase 4.1.1.20 ko01230; Metabolism; Global and overview maps; Biosynthesis of amino acids | ko00300; Metabolism; Amino acid metabolism; Lysine biosynthesis}	{At3g14390; KOG0622 Ornithine decarboxylase E Amino acid transport and metabolism ;}	{GO:0003824; NA}	{XM_010265289.2; PREDICTED: Nelumbo nucifera diaminopimelate decarboxylase 2, chloroplastic-like (LOC104601807), mRNA}	{PF00278:Pyridoxal-dependent decarboxylase, C-terminal sheet domain PF02784:Pyridoxal-dependent decarboxylase, pyridoxal binding domain}
transcript_HQ_HBZL_transcript1048/f4p0/3728	3729	1652.98	0	0	0	1.94	24.67	0	0	0	0.03	{XP_010247725.1; PREDICTED: exocyst complex component SEC8 [Nelumbo nucifera]}	{sp|Q93YU5|SEC8_ARATH; Exocyst complex component SEC8 OS=Arabidopsis thaliana GN=SEC8 PE=1 SV=1}	{vvi:100253015; K06111 EXOC4, SEC8 exocyst complex component 4 - -}	{NA}	{GO:0015031; protein transport; biological_process GO:0000145; exocyst; cellular_component GO:0006904; vesicle docking involved in exocytosis; biological_process}	{XM_002269627.3; PREDICTED: Vitis vinifera exocyst complex component SEC8 (LOC100253015), transcript variant X5, mRNA}	{PF04048:Sec8 exocyst complex component specific domain}
transcript_HQ_HBZL_transcript10495/f2p0/1993	1993	580.7	0	1.46	0	0	17.23	0	0.04	0	0	{XP_010260597.1; PREDICTED: SNF1-related protein kinase catalytic subunit alpha KIN10 [Nelumbo nucifera]}	{sp|Q38997|KIN10_ARATH; SNF1-related protein kinase catalytic subunit alpha KIN10 OS=Arabidopsis thaliana GN=KIN10 PE=1 SV=2}	{nnu:104599671; K07198 PRKAA, AMPK 5'-AMP-activated protein kinase, catalytic alpha subunit 2.7.11.11 ko04371; Environmental Information Processing; Signal transduction; Apelin signaling pathway | ko04068; Environmental Information Processing; Signal transduction; FoxO signaling pathway | ko04151; Environmental Information Processing; Signal transduction; PI3K-Akt signaling pathway | ko04152; Env…	{At3g01090; KOG0583 Serine/threonine protein kinase T Signal transduction mechanisms ;}	{GO:0016773; phosphotransferase activity, alcohol group as acceptor; molecular_function GO:0005524; ATP binding; molecular_function GO:0004674; protein serine/threonine kinase activity; molecular_function GO:0006468; protein phosphorylation; biological_process GO:0016020; membrane; cellular_component GO:0004672; protein kinase activity; molecular_function}	{XM_010662796.2; PREDICTED: Vitis vinifera SNF1-related protein kinase catalytic subunit alpha KIN10 (LOC100254223), transcript variant X3, mRNA}	{PF06293:Lipopolysaccharide kinase (Kdo/WaaP) family PF05445:Poxvirus serine/threonine protein kinase PF08587:Ubiquitin associated domain (UBA) PF07714:Protein tyrosine kinase PF00069:Protein kinase domain}
transcript_HQ_HBZL_transcript10497/f4p0/2011	2011	392.35	0	0	0	0	11.52	0	0	0	0	{XP_015880816.1; PREDICTED: uncharacterized protein LOC107416798 [Ziziphus jujuba]}	{NA}	{vvi:100266500; - - - - -}	{NA}	{NA}	{XM_016045298.1; PREDICTED: Ziziphus jujuba uncharacterized LOC107433904 (LOC107433904), transcript variant X2, mRNA}	{NA}
transcript_HQ_HBZL_transcript104/f2p0/5853	5853	1918.55	68.47	5	0	0	17.8	0.6	0.05	0	0	{XP_010272018.1; PREDICTED: uncharacterized protein LOC104607929 [Nelumbo nucifera]}	{NA}	{nnu:104595534; - - - - -}	{At3g48050; KOG1886 BAH domain proteins K Transcription ;}	{GO:0005634; nucleus; cellular_component GO:0003682; chromatin binding; molecular_function}	{XM_010256292.2; PREDICTED: Nelumbo nucifera uncharacterized LOC104595534 (LOC104595534), mRNA}	{PF08711:TFIIS helical bundle-like domain PF01426:BAH domain}
transcript_HQ_HBZL_transcript10503/f9p0/1941	1941	1918.13	0	3	5.68	0	58.66	0	0.09	0.2	0	{XP_002280419.1; PREDICTED: uncharacterized protein LOC100264719 isoform X1 [Vitis vinifera]}	{NA}	{vvi:100264719; - - - - -}	{At2g19880; KOG2547 Ceramide glucosyltransferase IM Lipid transport and metabolism ; Cell wall/membrane/envelope biogenesis ;}	{GO:0016757; transferase activity, transferring glycosyl groups; molecular_function}	{XM_002280383.4; PREDICTED: Vitis vinifera ceramide glucosyltransferase-like (LOC100264719), transcript variant X1, mRNA}	{PF13506:Glycosyl transferase family 21}
transcript_HQ_HBZL_transcript10504/f2p0/1993	1993	408.04	0	0	0	0	12.11	0	0	0	0	{OAY50812.1; hypothetical protein MANES_05G164300 [Manihot esculenta]}	{sp|Q5EAF2|IP5PB_ARATH; Type IV inositol polyphosphate 5-phosphatase 11 OS=Arabidopsis thaliana GN=IP5P11 PE=1 SV=1}	{cit:102620998; K01106 E3.1.3.56 inositol-1,4,5-trisphosphate 5-phosphatase 3.1.3.56 ko00562; Metabolism; Carbohydrate metabolism; Inositol phosphate metabolism | ko04070; Environmental Information Processing; Signal transduction; Phosphatidylinositol signaling system}	{At1g47510; KOG0565 Inositol polyphosphate 5-phosphatase and related proteins U Intracellular trafficking, secretion, and vesicular transport ;}	{NA}	{NA}	{NA}
transcript_HQ_HBZL_transcript10507/f6p0/1956	1956	1766.85	0	0	0	0	53.56	0	0	0	0	{XP_009364298.1; PREDICTED: protein SUPPRESSOR OF K(+) TRANSPORT GROWTH DEFECT 1 [Pyrus x bretschneideri]}	{sp|Q9ZNT0|VPS4_ARATH; Protein SUPPRESSOR OF K(+) TRANSPORT GROWTH DEFECT 1 OS=Arabidopsis thaliana GN=SKD1 PE=1 SV=1}	{mdm:103447974; K12196 VPS4 vacuolar protein-sorting-associated protein 4 - ko04144; Cellular Processes; Transport and catabolism; Endocytosis}	{At2g27600; KOG0739 AAA+-type ATPase O Posttranslational modification, protein turnover, chaperones ;}	{GO:0006310; DNA recombination; biological_process GO:0003724; RNA helicase activity; molecular_function GO:0006281; DNA repair; biological_process GO:0003678; DNA helicase activity; molecular_function GO:0008134; transcription factor binding; molecular_function GO:0003723; RNA binding; molecular_function GO:0016887; ATPase activity; molecular_function GO:0005524; ATP binding; molecular_function …	{XM_010246106.1; PREDICTED: Nelumbo nucifera protein SUPPRESSOR OF K(+) TRANSPORT GROWTH DEFECT 1-like (LOC104588250), mRNA}	{PF01637:ATPase domain predominantly from Archaea PF00910:RNA helicase PF06309:Torsin PF07728:AAA domain (dynein-related subfamily) PF07724:AAA domain (Cdc48 subfamily) PF00158:Sigma-54 interaction domain PF01695:IstB-like ATP binding protein PF00004:ATPase family associated with various cellular activities (AAA) PF02562:PhoH-like protein PF01057:Parvovirus non-structural protein NS1 PF05496:Holl…
transcript_HQ_HBZL_transcript10509/f2p0/2005	2005	93.7	0	0	0	0	2.76	0	0	0	0	{XP_010247424.1; PREDICTED: CTD small phosphatase-like protein 2-A isoform X1 [Nelumbo nucifera]}	{sp|Q54GB2|CTSL2_DICDI; CTD small phosphatase-like protein 2 OS=Dictyostelium discoideum GN=ctdspl2 PE=3 SV=1}	{vvi:100258847; K17616 CTDSPL2 CTD small phosphatase-like protein 2 3.1.3.- -}	{At5g11860; KOG1605 TFIIF-interacting CTD phosphatase, including NLI-interacting factor (involved in RNA polymerase II regulation) K Transcription ;}	{NA}	{XM_010249124.2; PREDICTED: Nelumbo nucifera CTD small phosphatase-like protein 2-A (LOC104590452), transcript variant X3, mRNA}	{NA}
transcript_HQ_HBZL_transcript1050/f4p0/3734	3734	1265.47	20.45	9.35	3.64	4.63	18.86	0.29	0.14	0.06	0.07	{XP_017970912.1; PREDICTED: non-lysosomal glucosylceramidase [Theobroma cacao]}	{sp|Q69ZF3|GBA2_MOUSE; Non-lysosomal glucosylceramidase OS=Mus musculus GN=Gba2 PE=1 SV=2}	{vvi:100248921; K17108 GBA2 non-lysosomal glucosylceramidase 3.2.1.45 ko00600; Metabolism; Lipid metabolism; Sphingolipid metabolism | ko00511; Metabolism; Glycan biosynthesis and metabolism; Other glycan degradation}	{At5g49900; KOG2119 Predicted bile acid beta-glucosidase G Carbohydrate transport and metabolism ;}	{GO:0004553; hydrolase activity, hydrolyzing O-glycosyl compounds; molecular_function GO:0005509; calcium ion binding; molecular_function}	{XM_010659660.2; PREDICTED: Vitis vinifera non-lysosomal glucosylceramidase (LOC100248921), transcript variant X3, mRNA}	{PF00036:EF hand PF13202:EF hand PF04685:Glycosyl-hydrolase family 116, catalytic region}
transcript_HQ_HBZL_transcript10510/f2p0/1498	1498	75.5	0	0	0	0	3.12	0	0	0	0	{XP_010252027.1; PREDICTED: serine/threonine-protein kinase AtPK2/AtPK19-like [Nelumbo nucifera]}	{sp|Q39030|KPK2_ARATH; Serine/threonine-protein kinase AtPK2/AtPK19 OS=Arabidopsis thaliana GN=ATPK2 PE=1 SV=2}	{nnu:104593748; K04688 RPS6KB ribosomal protein S6 kinase beta 2.7.11.1 ko04012; Environmental Information Processing; Signal transduction; ErbB signaling pathway | ko04350; Environmental Information Processing; Signal transduction; TGF-beta signaling pathway | ko04371; Environmental Information Processing; Signal transduction; Apelin signaling pathway | ko04066; Environmental Information Process…	{At3g08720; KOG0598 Ribosomal protein S6 kinase and related proteins RT General function prediction only ; Signal transduction mechanisms ;}	{GO:0005524; ATP binding; molecular_function GO:0016773; phosphotransferase activity, alcohol group as acceptor; molecular_function GO:0004672; protein kinase activity; molecular_function GO:0006468; protein phosphorylation; biological_process GO:0016020; membrane; cellular_component}	{XM_012235644.1; PREDICTED: Jatropha curcas serine/threonine-protein kinase AtPK2/AtPK19-like (LOC105649090), mRNA}	{PF00069:Protein kinase domain PF07714:Protein tyrosine kinase PF06293:Lipopolysaccharide kinase (Kdo/WaaP) family}
transcript_HQ_HBZL_transcript10512/f4p0/2000	2000	8810.3	0	0	0	0	260.4	0	0	0	0	{ABY60447.1; serine/threonine protein kinase [Adonis aestivalis var. palaestina]}	{sp|P43288|KSG1_ARATH; Shaggy-related protein kinase alpha OS=Arabidopsis thaliana GN=ASK1 PE=1 SV=3}	{egu:105044948; - - - - -}	{At3g05840; KOG0658 Glycogen synthase kinase-3 G Carbohydrate transport and metabolism ;}	{GO:0016020; membrane; cellular_component GO:0006468; protein phosphorylation; biological_process GO:0004672; protein kinase activity; molecular_function GO:0016773; phosphotransferase activity, alcohol group as acceptor; molecular_function GO:0005524; ATP binding; molecular_function}	{XM_010272605.2; PREDICTED: Nelumbo nucifera shaggy-related protein kinase alpha-like (LOC104607094), transcript variant X3, mRNA}	{PF07714:Protein tyrosine kinase PF00069:Protein kinase domain PF06293:Lipopolysaccharide kinase (Kdo/WaaP) family PF05445:Poxvirus serine/threonine protein kinase}
transcript_HQ_HBZL_transcript10513/f2p0/1990	1990	356.37	0	0	0	0	10.59	0	0	0	0	{XP_010274430.1; PREDICTED: shaggy-related protein kinase eta-like [Nelumbo nucifera]}	{sp|Q39011|KSG7_ARATH; Shaggy-related protein kinase eta OS=Arabidopsis thaliana GN=ASK7 PE=1 SV=2}	{cit:102607198; K14502 BIN2 protein brassinosteroid insensitive 2 2.7.11.1 ko04075; Environmental Information Processing; Signal transduction; Plant hormone signal transduction}	{At4g18710; KOG0658 Glycogen synthase kinase-3 G Carbohydrate transport and metabolism ;}	{GO:0004672; protein kinase activity; molecular_function GO:0006468; protein phosphorylation; biological_process GO:0005524; ATP binding; molecular_function}	{FQ387941.1; Vitis vinifera clone SS0AEB24YM07}	{PF07714:Protein tyrosine kinase PF00069:Protein kinase domain}
transcript_HQ_HBZL_transcript10514/f6p0/1998	1998	195.48	0	0	0	0	5.78	0	0	0	0	{XP_010274674.1; PREDICTED: serine carboxypeptidase-like 50 [Nelumbo nucifera]}	{sp|Q9M9Q6|SCP50_ARATH; Serine carboxypeptidase-like 50 OS=Arabidopsis thaliana GN=SCPL50 PE=2 SV=1}	{vvi:100257846; K09645 CPVL vitellogenic carboxypeptidase-like protein 3.4.16.- -}	{At1g15000; KOG1282 Serine carboxypeptidases (lysosomal cathepsin A) OE Posttranslational modification, protein turnover, chaperones ; Amino acid transport and metabolism ;}	{GO:0004185; serine-type carboxypeptidase activity; molecular_function GO:0006508; proteolysis; biological_process}	{XM_014772750.1; PREDICTED: Glycine max serine carboxypeptidase-like 50 (LOC100780822), mRNA}	{PF00450:Serine carboxypeptidase}
transcript_HQ_HBZL_transcript10515/f6p0/2005	2005	3102	83.56	89.77	36.5	75.68	91.42	2.33	2.64	1.21	2.3	{AFN61200.1; squalene epoxidase [Chlorophytum borivilianum]}	{sp|O48651|ERG1_PANGI; Squalene monooxygenase OS=Panax ginseng PE=2 SV=1}	{bdi:100839945; K00511 SQLE, ERG1 squalene monooxygenase 1.14.14.17 ko00100; Metabolism; Lipid metabolism; Steroid biosynthesis | ko00909; Metabolism; Metabolism of terpenoids and polyketides; Sesquiterpenoid and triterpenoid biosynthesis}	{At1g58440; KOG1298 Squalene monooxygenase I Lipid transport and metabolism ;}	{GO:0008033; tRNA processing; biological_process GO:0016021; integral to membrane; cellular_component GO:0016491; oxidoreductase activity; molecular_function GO:0016616; oxidoreductase activity, acting on the CH-OH group of donors, NAD or NADP as acceptor; molecular_function GO:0071949; FAD binding; molecular_function GO:0055114; oxidation-reduction process; biological_process GO:0050660; flavin …	{FJ232947.1; Nigella sativa squalene epoxidase 1 (sqe1) mRNA, complete cds}	{PF01210:NAD-dependent glycerol-3-phosphate dehydrogenase N-terminus PF08491:Squalene epoxidase PF01494:FAD binding domain PF01266:FAD dependent oxidoreductase PF00070:Pyridine nucleotide-disulphide oxidoreductase PF01134:Glucose inhibited division protein A PF07992:Pyridine nucleotide-disulphide oxidoreductase PF02558:Ketopantoate reductase PanE/ApbA PF02737:3-hydroxyacyl-CoA dehydrogenase, NAD …
transcript_HQ_HBZL_transcript10517/f12p0/1993	1993	5414.52	38.99	6.89	0	2.41	160.67	1.09	0.2	0	0.07	{EOY00188.1; 3-ketoacyl-CoA synthase 6 [Theobroma cacao]}	{sp|Q9XF43|KCS6_ARATH; 3-ketoacyl-CoA synthase 6 OS=Arabidopsis thaliana GN=CUT1 PE=1 SV=1}	{nnu:104601864; K15397 KCS 3-ketoacyl-CoA synthase 2.3.1.199 ko00062; Metabolism; Lipid metabolism; Fatty acid elongation}	{NA}	{GO:0016747; transferase activity, transferring acyl groups other than amino-acyl groups; molecular_function GO:0006633; fatty acid biosynthetic process; biological_process GO:0016020; membrane; cellular_component}	{XM_013614730.1; Medicago truncatula 3-ketoacyl-CoA synthase-like protein mRNA}	{PF08392:FAE1/Type III polyketide synthase-like protein}
transcript_HQ_HBZL_transcript10518/f16p0/1954	1954	1210.83	0	0	0	0	36.75	0	0	0	0	{XP_012080068.1; PREDICTED: peroxisomal membrane protein PEX14 [Jatropha curcas]}	{sp|Q9FXT6|PEX14_ARATH; Peroxisomal membrane protein PEX14 OS=Arabidopsis thaliana GN=PEX14 PE=1 SV=2}	{sind:105157211; K13343 PEX14 peroxin-14 - ko04146; Cellular Processes; Transport and catabolism; Peroxisome}	{At5g62810_2; KOG2629 Peroxisomal membrane anchor protein (peroxin) MOU Cell wall/membrane/envelope biogenesis ; Posttranslational modification, protein turnover, chaperones ; Intracellular trafficking, secretion, and vesicular transport ;}	{GO:0001700; embryonic development via the syncytial blastoderm; biological_process GO:0009405; pathogenesis; biological_process GO:0007259; JAK-STAT cascade; biological_process}	{XM_010925958.2; PREDICTED: Elaeis guineensis peroxisomal membrane protein PEX14 (LOC105047152), mRNA}	{PF15972:Unpaired protein PF04888:Secretion system effector C (SseC) like family }
transcript_HQ_HBZL_transcript10519/f2p0/1999	1999	308.11	7	16.45	31.32	24.31	9.11	0.2	0.49	1.04	0.74	{XP_010269777.1; PREDICTED: CLK4-associating serine/arginine rich protein isoform X2 [Nelumbo nucifera]}	{sp|Q8N2M8|CLASR_HUMAN; CLK4-associating serine/arginine rich protein OS=Homo sapiens GN=CLASRP PE=1 SV=4}	{nnu:104606326; K13168 SFRS16 splicing factor, arginine/serine-rich 16 - -}	{At4g36980; KOG2548 SWAP mRNA splicing regulator A RNA processing and modification ;}	{NA}	{XM_010271475.2; PREDICTED: Nelumbo nucifera CLK4-associating serine/arginine rich protein (LOC104606326), transcript variant X2, mRNA}	{NA}
transcript_HQ_HBZL_transcript1051/f4p0/3633	3633	254.98	0	0	0	0	3.91	0	0	0	0	{XP_010260071.1; PREDICTED: 2-oxoglutarate dehydrogenase, mitochondrial-like [Nelumbo nucifera]}	{sp|Q54JE4|ODO1_DICDI; 2-oxoglutarate dehydrogenase, mitochondrial OS=Dictyostelium discoideum GN=ogdh PE=3 SV=1}	{nnu:104599289; K00164 OGDH, sucA 2-oxoglutarate dehydrogenase E1 component 1.2.4.2 ko01200; Metabolism; Global and overview maps; Carbon metabolism | ko00020; Metabolism; Carbohydrate metabolism; Citrate cycle (TCA cycle) | ko00310; Metabolism; Amino acid metabolism; Lysine degradation | ko00380; Metabolism; Amino acid metabolism; Tryptophan metabolism}	{At5g65750; KOG0450 2-oxoglutarate dehydrogenase, E1 subunit G Carbohydrate transport and metabolism ;}	{GO:0016624; oxidoreductase activity, acting on the aldehyde or oxo group of donors, disulfide as acceptor; molecular_function GO:0008152; NA}	{XM_010279298.2; PREDICTED: Nelumbo nucifera 2-oxoglutarate dehydrogenase, mitochondrial-like (LOC104611994), mRNA}	{PF00676:Dehydrogenase E1 component}
transcript_HQ_HBZL_transcript10520/f2p0/1997	1997	491.16	0	6	21	12	14.54	0	0.18	0.7	0.37	{XP_002268370.1; PREDICTED: uncharacterized protein LOC100262360 [Vitis vinifera]}	{NA}	{pvu:PHAVU_008G188100g; - - - - -}	{NA}	{NA}	{XM_002268334.4; PREDICTED: Vitis vinifera uncharacterized LOC100262360 (LOC100262360), mRNA}	{NA}
transcript_HQ_HBZL_transcript10521/f2p0/2008	2008	0	0	0	0	0	0	0	0	0	0	{XP_010250611.1; PREDICTED: protein MICRORCHIDIA 7 isoform X1 [Nelumbo nucifera]}	{sp|F4JRS4|MORC7_ARATH; Protein MICRORCHIDIA 7 OS=Arabidopsis thaliana GN=MORC7 PE=1 SV=1}	{nnu:104592813; - - - - -}	{At5g50780; KOG1845 MORC family ATPases D Cell cycle control, cell division, chromosome partitioning ;}	{GO:0016491; oxidoreductase activity; molecular_function GO:0020037; heme binding; molecular_function GO:0051536; iron-sulfur cluster binding; molecular_function GO:0055114; oxidation-reduction process; biological_process}	{XM_008792565.1; PREDICTED: Phoenix dactylifera protein MICRORCHIDIA 7-like (LOC103707873), mRNA}	{PF01077:Nitrite and sulphite reductase 4Fe-4S domain}
transcript_HQ_HBZL_transcript10523/f2p0/1953	1946	15	1	2.89	0	1	0.46	0.03	0.09	0	0.03	{KOM25907.1; hypothetical protein LR48_Vigan205s004400 [Vigna angularis]}	{sp|Q9SGW3|PSD8A_ARATH; 26S proteasome non-ATPase regulatory subunit 8 homolog A OS=Arabidopsis thaliana GN=RPN12A PE=1 SV=1}	{var:108319418; K03031 PSMD8, RPN12 26S proteasome regulatory subunit N12 - ko03050; Genetic Information Processing; Folding, sorting and degradation; Proteasome | ko05169; Human Diseases; Infectious diseases: Viral; Epstein-Barr virus infection}	{At1g64520; KOG3151 26S proteasome regulatory complex, subunit RPN12/PSMD8 O Posttranslational modification, protein turnover, chaperones ;}	{NA}	{XM_004498858.2; PREDICTED: Cicer arietinum 26S proteasome non-ATPase regulatory subunit 8 homolog A-like (LOC101512310), mRNA}	{NA}
transcript_HQ_HBZL_transcript10524/f2p0/1989	1984	513.9	0	0	0	0	15.33	0	0	0	0	{XP_012474320.1; PREDICTED: heptahelical transmembrane protein 2-like [Gossypium raimondii]}	{sp|Q6ETK9|ADPO2_ORYSJ; Heptahelical transmembrane protein ADIPOR2 OS=Oryza sativa subsp. japonica GN=ADIPOR2 PE=2 SV=1}	{gra:105791013; K07297 ADIPOR adiponectin receptor - ko04152; Environmental Information Processing; Signal transduction; AMPK signaling pathway | ko04920; Organismal Systems; Endocrine system; Adipocytokine signaling pathway | ko04211; Organismal Systems; Aging; Longevity regulating pathway | ko04932; Human Diseases; Endocrine and metabolic diseases; Non-alcoholic fatty liver disease (NAFLD)}	{At4g30850; KOG0748 Predicted membrane proteins, contain hemolysin III domain RT General function prediction only ; Signal transduction mechanisms ;}	{NA}	{NA}	{NA}
transcript_HQ_HBZL_transcript1052/f5p0/3638	3654	526.99	0	0	0	0	8.04	0	0	0	0	{XP_010247555.1; PREDICTED: protein MEI2-like 2 [Nelumbo nucifera]}	{sp|Q6ZI17|OML2_ORYSJ; Protein MEI2-like 2 OS=Oryza sativa subsp. japonica GN=ML2 PE=2 SV=1}	{vvi:100246862; - - - - -}	{At1g29400; KOG4660 Protein Mei2, essential for commitment to meiosis, and related proteins D Cell cycle control, cell division, chromosome partitioning ;}	{GO:0003676; nucleic acid binding; molecular_function}	{XM_002279756.4; PREDICTED: Vitis vinifera protein MEI2-like 2 (LOC100245436), mRNA}	{PF00076:RNA recognition motif. (a.k.a. RRM, RBD, or RNP domain)}
transcript_HQ_HBZL_transcript10531/f2p0/2002	2001	281.68	0	0	0	0	8.32	0	0	0	0	{XP_012853577.1; PREDICTED: L-ascorbate oxidase [Erythranthe guttata]}	{sp|Q40588|ASO_TOBAC; L-ascorbate oxidase OS=Nicotiana tabacum GN=AAO PE=2 SV=1}	{nta:107771511; - - - - -}	{At4g39830; KOG1263 Multicopper oxidases Q Secondary metabolites biosynthesis, transport and catabolism ;}	{GO:0016491; oxidoreductase activity; molecular_function GO:0005507; copper ion binding; molecular_function GO:0055114; oxidation-reduction process; biological_process}	{XM_016035394.1; PREDICTED: Ziziphus jujuba L-ascorbate oxidase (LOC107425391), mRNA}	{PF00394:Multicopper oxidase PF07731:Multicopper oxidase}
transcript_HQ_HBZL_transcript10532/f3p0/2006	2006	0	43.37	18.44	118.26	101.09	0	1.21	0.54	3.92	3.07	{XP_015880816.1; PREDICTED: uncharacterized protein LOC107416798 [Ziziphus jujuba]}	{NA}	{vvi:100266500; - - - - -}	{NA}	{NA}	{XM_016045298.1; PREDICTED: Ziziphus jujuba uncharacterized LOC107433904 (LOC107433904), transcript variant X2, mRNA}	{NA}
transcript_HQ_HBZL_transcript10534/f7p0/1997	1997	429	0	0	0	0	12.7	0	0	0	0	{XP_002279085.1; PREDICTED: UDP-sulfoquinovose synthase, chloroplastic [Vitis vinifera]}	{sp|Q84KI6|SQD1_SPIOL; UDP-sulfoquinovose synthase, chloroplastic OS=Spinacia oleracea GN=SQD1 PE=1 SV=1}	{nnu:104593467; K06118 SQD1, sqdB UDP-sulfoquinovose synthase 3.13.1.1 ko00520; Metabolism; Carbohydrate metabolism; Amino sugar and nucleotide sugar metabolism | ko00561; Metabolism; Lipid metabolism; Glycerolipid metabolism}	{At4g33030; KOG1371 UDP-glucose 4-epimerase/UDP-sulfoquinovose synthase M Cell wall/membrane/envelope biogenesis ;}	{GO:0003824; NA GO:0055114; oxidation-reduction process; biological_process GO:0050662; coenzyme binding; molecular_function GO:0016491; oxidoreductase activity; molecular_function}	{XM_009363728.2; PREDICTED: Pyrus x bretschneideri UDP-sulfoquinovose synthase, chloroplastic (LOC103952180), mRNA}	{PF01370:NAD dependent epimerase/dehydratase family PF07992:Pyridine nucleotide-disulphide oxidoreductase}
transcript_HQ_HBZL_transcript10539/f14p0/1970	1970	4514.42	0	0	0	0	135.74	0	0	0	0	{XP_010653149.1; PREDICTED: protein DETOXIFICATION 21 [Vitis vinifera]}	{sp|Q8W488|DTX21_ARATH; Protein DETOXIFICATION 21 OS=Arabidopsis thaliana GN=DTX21 PE=1 SV=1}	{rcu:8268582; K03327 TC.MATE, SLC47A, norM, mdtK, dinF multidrug resistance protein, MATE family - -}	{At1g33110; KOG1347 Uncharacterized membrane protein, predicted efflux pump R General function prediction only ;}	{GO:0016020; membrane; cellular_component GO:0015238; drug transmembrane transporter activity; molecular_function GO:0015297; antiporter activity; molecular_function GO:0055085; transmembrane transport; biological_process GO:0006855; drug transmembrane transport; biological_process}	{XM_015228361.1; PREDICTED: Solanum pennellii protein DETOXIFICATION 21-like (LOC107027179), mRNA}	{PF01554:MatE}
transcript_HQ_HBZL_transcript1053/f6p0/3710	3711	831	0	0	0	0	12.46	0	0	0	0	{XP_010244136.1; PREDICTED: vacuolar protein-sorting-associated protein 11 homolog isoform X1 [Nelumbo nucifera]}	{sp|Q9SJ40|VPS11_ARATH; Vacuolar protein-sorting-associated protein 11 homolog OS=Arabidopsis thaliana GN=VPS11 PE=1 SV=1}	{vvi:100266606; K20179 VPS11, PEP5 vacuolar protein sorting-associated protein 11 - ko04138; Cellular Processes; Transport and catabolism; Autophagy - yeast}	{At2g05170; KOG2114 Vacuolar assembly/sorting protein PEP5/VPS11 U Intracellular trafficking, secretion, and vesicular transport ;}	{GO:0008270; zinc ion binding; molecular_function GO:0016192; vesicle-mediated transport; biological_process GO:0006886; intracellular protein transport; biological_process GO:0005515; protein binding; molecular_function}	{XM_016043292.1; PREDICTED: Ziziphus jujuba vacuolar protein-sorting-associated protein 11 homolog (LOC107432208), mRNA}	{PF12678:RING-H2 zinc finger domain PF17122:Zinc-finger PF00637:Region in Clathrin and VPS PF14634:zinc-RING finger domain PF13639:Ring finger domain}
transcript_HQ_HBZL_transcript10544/f3p0/1988	1988	363.15	0	23.34	56.19	45.08	10.81	0	0.69	1.88	1.38	{CAN65390.1; hypothetical protein VITISV_038363 [Vitis vinifera]}	{sp|Q9LV21|TCPD_ARATH; T-complex protein 1 subunit delta OS=Arabidopsis thaliana GN=CCT4 PE=1 SV=1}	{nnu:104592688; K09496 CCT4 T-complex protein 1 subunit delta - -}	{At3g18190; KOG0358 Chaperonin complex component, TCP-1 delta subunit (CCT4) O Posttranslational modification, protein turnover, chaperones ;}	{GO:0005524; ATP binding; molecular_function}	{XM_017755547.1; PREDICTED: Gossypium arboreum T-complex protein 1 subunit delta-like (LOC108456842), mRNA}	{PF00118:TCP-1/cpn60 chaperonin family}
transcript_HQ_HBZL_transcript10545/f3p0/1999	1999	2387	0	0	0	0	70.59	0	0	0	0	{XP_010242143.1; PREDICTED: protein transport protein Sec61 subunit alpha [Nelumbo nucifera]}	{sp|Q54XK2|SC61A_DICDI; Protein transport protein Sec61 subunit alpha OS=Dictyostelium discoideum GN=sec61a PE=3 SV=1}	{pper:PRUPE_ppa005115mg; K10956 SEC61A protein transport protein SEC61 subunit alpha - ko03060; Genetic Information Processing; Folding, sorting and degradation; Protein export | ko04141; Genetic Information Processing; Folding, sorting and degradation; Protein processing in endoplasmic reticulum | ko04145; Cellular Processes; Transport and catabolism; Phagosome | ko05110; Human Diseases; Infecti…	{At2g34250; KOG1373 Transport protein Sec61, alpha subunit UO Intracellular trafficking, secretion, and vesicular transport ; Posttranslational modification, protein turnover, chaperones ;}	{GO:0015031; protein transport; biological_process GO:0016020; membrane; cellular_component}	{XM_010243841.2; PREDICTED: Nelumbo nucifera protein transport protein Sec61 subunit alpha (LOC104586563), mRNA}	{PF00344:SecY translocase}
transcript_HQ_HBZL_transcript10548/f2p0/1913	1904	133	0	0	0	3	4.16	0	0	0	0.1	{XP_010271925.1; PREDICTED: transcription factor PCL1-like [Nelumbo nucifera]}	{sp|Q94DH3|PCL1_ORYSJ; Transcription factor PCL1 OS=Oryza sativa subsp. japonica GN=PCL1 PE=2 SV=1}	{mdm:103449881; - - - - -}	{NA}	{NA}	{NA}	{NA}
transcript_HQ_HBZL_transcript10549/f8p0/2029	2029	647	0	0	0	0	18.81	0	0	0	0	{XP_010273801.1; PREDICTED: pectinesterase [Nelumbo nucifera]}	{sp|P83948|PME3_CITSI; Pectinesterase 3 OS=Citrus sinensis PE=1 SV=1}	{pop:POPTR_0003s07040g; K01051 E3.1.1.11 pectinesterase 3.1.1.11 ko00040; Metabolism; Carbohydrate metabolism; Pentose and glucuronate interconversions}	{NA}	{GO:0004857; enzyme inhibitor activity; molecular_function GO:0042545; cell wall modification; biological_process GO:0030599; pectinesterase activity; molecular_function GO:0005618; cell wall; cellular_component}	{XM_006372087.1; Populus trichocarpa hypothetical protein (POPTR_0018s12530g) mRNA, complete cds}	{PF04043:Plant invertase/pectin methylesterase inhibitor PF01095:Pectinesterase}
transcript_HQ_HBZL_transcript10550/f15p0/1982	1982	1131.35	0	0	0	0	33.78	0	0	0	0	{XP_010264716.1; PREDICTED: zinc finger protein JACKDAW [Nelumbo nucifera]}	{sp|Q700D2|IDD10_ARATH; Zinc finger protein JACKDAW OS=Arabidopsis thaliana GN=JKD PE=1 SV=1}	{nnu:104594822; - - - - -}	{At5g03150; KOG1721 FOG: Zn-finger R General function prediction only ;}	{GO:0030127; COPII vesicle coat; cellular_component GO:0006886; intracellular protein transport; biological_process GO:0006888; ER to Golgi vesicle-mediated transport; biological_process GO:0008270; zinc ion binding; molecular_function GO:0046872; metal ion binding; molecular_function}	{XM_010685812.2; PREDICTED: Beta vulgaris subsp. vulgaris zinc finger protein JACKDAW (LOC104898708), mRNA}	{PF04810:Sec23/Sec24 zinc finger PF13465:Zinc-finger double domain PF00096:Zinc finger, C2H2 type}
transcript_HQ_HBZL_transcript10552/f6p0/2006	2023	0	0	0	0	0	0	0	0	0	0	{XP_010263644.1; PREDICTED: sugar transporter ERD6-like 6 [Nelumbo nucifera]}	{sp|Q93YP9|ERDL4_ARATH; Sugar transporter ERD6-like 4 OS=Arabidopsis thaliana GN=At1g19450 PE=2 SV=1}	{nnu:104595672; K08145 SLC2A8, GLUT8 MFS transporter, SP family, solute carrier family 2 (facilitated glucose transporter), member 8 - -}	{At1g19450; KOG0254 Predicted transporter (major facilitator superfamily) R General function prediction only ;}	{GO:0022857; transmembrane transporter activity; molecular_function GO:0016021; integral to membrane; cellular_component GO:0055085; transmembrane transport; biological_process}	{XM_006473448.2; PREDICTED: Citrus sinensis sugar transporter ERD6-like 6 (LOC102612147), transcript variant X3, mRNA}	{PF00083:Sugar (and other) transporter PF07690:Major Facilitator Superfamily}
transcript_HQ_HBZL_transcript10553/f2p0/2015	2016	12.08	13.24	8.07	6.01	4.62	0.35	0.37	0.24	0.2	0.14	{GAV61726.1; DUF1336 domain-containing protein [Cephalotus follicularis]}	{NA}	{nnu:104598353; - - - - -}	{NA}	{NA}	{XM_010259919.2; PREDICTED: Nelumbo nucifera uncharacterized LOC104598041 (LOC104598041), transcript variant X2, mRNA}	{NA}
transcript_HQ_HBZL_transcript10554/f2p0/2059	2059	65.63	0	0	0	0	1.88	0	0	0	0	{XP_019709562.1; PREDICTED: uncharacterized protein LOC105054914 [Elaeis guineensis]}	{sp|Q94AP0|ALN_ARATH; Allantoinase OS=Arabidopsis thaliana GN=ALN PE=1 SV=1}	{cit:102631418; K01466 allB allantoinase 3.5.2.5 ko00230; Metabolism; Nucleotide metabolism; Purine metabolism}	{YIR027c; KOG2584 Dihydroorotase and related enzymes F Nucleotide transport and metabolism ;}	{GO:0016787; hydrolase activity; molecular_function GO:0016788; hydrolase activity, acting on ester bonds; molecular_function}	{XM_006467751.2; PREDICTED: Citrus sinensis allantoinase (LOC102631418), mRNA}	{PF01026:TatD related DNase PF01979:Amidohydrolase family}
transcript_HQ_HBZL_transcript10556/f2p0/1502	1502	261.61	3.61	0	1.72	0	10.78	0.14	0	0.08	0	{XP_015866380.1; PREDICTED: dual specificity protein phosphatase 12-like isoform X2 [Ziziphus jujuba]}	{sp|Q9UNI6|DUS12_HUMAN; Dual specificity protein phosphatase 12 OS=Homo sapiens GN=DUSP12 PE=1 SV=1}	{pper:PRUPE_ppa007603mg; K14819 DUSP12, YVH1 dual specificity phosphatase 12 [EC:3.1.3.16 3.1.3.48] 3.1.3.16,3.1.3.48 -}	{Hs6005956; KOG1716 Dual specificity phosphatase V Defense mechanisms ;}	{GO:0006470; protein dephosphorylation; biological_process GO:0008138; protein tyrosine/serine/threonine phosphatase activity; molecular_function GO:0004725; protein tyrosine phosphatase activity; molecular_function GO:0005634; nucleus; cellular_component}	{XM_008242478.2; PREDICTED: Prunus mume dual specificity protein phosphatase 12-like (LOC103339196), mRNA}	{PF00782:Dual specificity phosphatase, catalytic domain PF08159:NUC153 domain PF00102:Protein-tyrosine phosphatase}
transcript_HQ_HBZL_transcript10564/f3p0/2008	2008	2878.97	91.5	226.09	207.1	107.33	84.71	2.55	6.65	6.87	3.26	{XP_010259454.1; PREDICTED: fumarate hydratase 1, mitochondrial [Nelumbo nucifera]}	{sp|P93033|FUM1_ARATH; Fumarate hydratase 1, mitochondrial OS=Arabidopsis thaliana GN=FUM1 PE=1 SV=2}	{nnu:104598878; K01679 E4.2.1.2B, fumC fumarate hydratase, class II 4.2.1.2 ko01200; Metabolism; Global and overview maps; Carbon metabolism | ko00020; Metabolism; Carbohydrate metabolism; Citrate cycle (TCA cycle) | ko00620; Metabolism; Carbohydrate metabolism; Pyruvate metabolism | ko00720; Metabolism; Energy metabolism; Carbon fixation pathways in prokaryotes | ko05200; Human Diseases; Cancers…	{At2g47510; KOG1317 Fumarase C Energy production and conversion ;}	{GO:0016829; lyase activity; molecular_function GO:0006099; tricarboxylic acid cycle; biological_process}	{XM_010261152.2; PREDICTED: Nelumbo nucifera fumarate hydratase 1, mitochondrial (LOC104598878), mRNA}	{PF10415:Fumarase C C-terminus}
transcript_HQ_HBZL_transcript10568/f5p0/2004	2003	1124	0	5	8	7.98	33.16	0	0.15	0.27	0.24	{XP_010256554.1; PREDICTED: probable WRKY transcription factor 72 isoform X1 [Nelumbo nucifera]}	{sp|Q9LXG8|WRK72_ARATH; Probable WRKY transcription factor 72 OS=Arabidopsis thaliana GN=WRKY72 PE=2 SV=1}	{nnu:104596936; - - - - -}	{NA}	{GO:0003700; sequence-specific DNA binding transcription factor activity; molecular_function GO:0043565; sequence-specific DNA binding; molecular_function GO:0006355; regulation of transcription, DNA-dependent; biological_process}	{XM_010244080.2; PREDICTED: Nelumbo nucifera probable WRKY transcription factor 72 (LOC104586751), mRNA}	{PF03106:WRKY DNA -binding domain}
transcript_HQ_HBZL_transcript1056/f3p0/3748	3750	1632.61	0	0	0	0	24.22	0	0	0	0	{XP_010252184.1; PREDICTED: protein transport protein Sec24-like At4g32640 isoform X2 [Nelumbo nucifera]}	{sp|Q9M081|SC24B_ARATH; Protein transport protein Sec24-like At4g32640 OS=Arabidopsis thaliana GN=At4g32640 PE=2 SV=3}	{nnu:104593849; K14007 SEC24 protein transport protein SEC24 - ko04141; Genetic Information Processing; Folding, sorting and degradation; Protein processing in endoplasmic reticulum}	{At3g44340; KOG1984 Vesicle coat complex COPII, subunit SFB3 U Intracellular trafficking, secretion, and vesicular transport ;}	{GO:0006888; ER to Golgi vesicle-mediated transport; biological_process GO:0008270; zinc ion binding; molecular_function GO:0030127; COPII vesicle coat; cellular_component GO:0006886; intracellular protein transport; biological_process}	{XM_010253882.2; PREDICTED: Nelumbo nucifera protein transport protein Sec24-like At4g32640 (LOC104593849), transcript variant X2, mRNA}	{PF04815:Sec23/Sec24 helical domain PF04810:Sec23/Sec24 zinc finger PF04811:Sec23/Sec24 trunk domain}
transcript_HQ_HBZL_transcript10570/f13p0/1978	1978	2655.63	0	0	0	0	79.48	0	0	0	0	{XP_010256512.2; PREDICTED: LEAF RUST 10 DISEASE-RESISTANCE LOCUS RECEPTOR-LIKE PROTEIN KINASE-like 2.1 [Nelumbo nucifera]}	{sp|F4HQ23|LRL27_ARATH; LEAF RUST 10 DISEASE-RESISTANCE LOCUS RECEPTOR-LIKE PROTEIN KINASE-like 2.7 OS=Arabidopsis thaliana GN=LRK10L-2.7 PE=3 SV=2}	{nnu:104596891; - - - - -}	{At5g38260; KOG1187 Serine/threonine protein kinase T Signal transduction mechanisms ;}	{GO:0005524; ATP binding; molecular_function GO:0030247; polysaccharide binding; molecular_function GO:0006468; protein phosphorylation; biological_process GO:0004672; protein kinase activity; molecular_function}	{XM_019401246.1; PREDICTED: Nicotiana attenuata LEAF RUST 10 DISEASE-RESISTANCE LOCUS RECEPTOR-LIKE PROTEIN KINASE-like 2.1 (LOC109235221), transcript variant X2, mRNA}	{PF13947:Wall-associated receptor kinase galacturonan-binding PF07714:Protein tyrosine kinase PF00069:Protein kinase domain}
transcript_HQ_HBZL_transcript10575/f3p0/1985	1985	66.49	0	0	0	1	1.98	0	0	0	0.03	{AIO10970.1; limonene synthase [Eleutherococcus trifoliatus]}	{sp|B3TPQ7|ATESY_MAGGA; Alpha-terpineol synthase, chloroplastic OS=Magnolia grandiflora PE=1 SV=1}	{vvi:100855144; K18108 E4.2.3.111 (-)-alpha-terpineol synthase 4.2.3.111 ko00902; Metabolism; Metabolism of terpenoids and polyketides; Monoterpenoid biosynthesis}	{NA}	{GO:0008152; NA GO:0010333; terpene synthase activity; molecular_function GO:0016829; lyase activity; molecular_function GO:0000287; magnesium ion binding; molecular_function}	{XM_012219969.1; PREDICTED: Jatropha curcas uncharacterized LOC105636646 (LOC105636646), mRNA}	{PF03936:Terpene synthase family, metal binding domain PF01397:Terpene synthase, N-terminal domain}
transcript_HQ_HBZL_transcript10576/f3p0/1992	1992	748	0	0	0	0	22.21	0	0	0	0	{XP_012831931.1; PREDICTED: DEAD-box ATP-dependent RNA helicase 42 [Erythranthe guttata]}	{sp|Q84UQ1|RH42_ORYSJ; DEAD-box ATP-dependent RNA helicase 42 OS=Oryza sativa subsp. japonica GN=Os08g0159900 PE=2 SV=1}	{jcu:105635165; K12811 DDX46, PRP5 ATP-dependent RNA helicase DDX46/PRP5 3.6.4.13 ko03040; Genetic Information Processing; Transcription; Spliceosome}	{At1g20920; KOG0334 RNA helicase A RNA processing and modification ;}	{GO:0003676; nucleic acid binding; molecular_function GO:0005524; ATP binding; molecular_function GO:0003677; DNA binding; molecular_function GO:0016787; hydrolase activity; molecular_function}	{NM_001337835.1; Arabidopsis thaliana P-loop containing nucleoside triphosphate hydrolases superfamily protein mRNA}	{PF04851:Type III restriction enzyme, res subunit PF00270:DEAD/DEAH box helicase}
transcript_HQ_HBZL_transcript10578/f3p0/1996	1996	146.62	0	0	0	0	4.34	0	0	0	0	{XP_010262327.1; PREDICTED: putative E3 ubiquitin-protein ligase XBAT34 [Nelumbo nucifera]}	{sp|Q7XI08|XB34_ORYSJ; Probable E3 ubiquitin-protein ligase XBOS34 OS=Oryza sativa subsp. japonica GN=XBOS34 PE=2 SV=1}	{vvi:100247153; - - - - -}	{NA}	{GO:0005515; protein binding; molecular_function GO:0008270; zinc ion binding; molecular_function}	{XM_010651794.2; PREDICTED: Vitis vinifera putative E3 ubiquitin-protein ligase XBAT35 (LOC104879290), transcript variant X2, mRNA}	{PF00023:Ankyrin repeat PF13606:Ankyrin repeat PF14634:zinc-RING finger domain PF13639:Ring finger domain}
transcript_HQ_HBZL_transcript10579/f2p0/2034	2034	352.9	2	53	13	34	10.23	0.05	1.54	0.42	1.02	{XP_010268803.1; PREDICTED: O-acyltransferase WSD1-like [Nelumbo nucifera]}	{sp|Q93ZR6|WSD1_ARATH; O-acyltransferase WSD1 OS=Arabidopsis thaliana GN=WSD1 PE=2 SV=1}	{nnu:104605653; - - - - -}	{NA}	{GO:0004144; diacylglycerol O-acyltransferase activity; molecular_function GO:0045017; glycerolipid biosynthetic process; biological_process}	{NA}	{PF03007:Wax ester synthase-like Acyl-CoA acyltransferase domain PF06974:Protein of unknown function (DUF1298)}
transcript_HQ_HBZL_transcript1057/f2p0/3751	3752	2264.88	0	7.01	13.48	0	33.58	0	0.1	0.22	0	{XP_010276717.1; PREDICTED: calcium-transporting ATPase 10, plasma membrane-type [Nelumbo nucifera]}	{sp|Q9SZR1|ACA10_ARATH; Calcium-transporting ATPase 10, plasma membrane-type OS=Arabidopsis thaliana GN=ACA10 PE=1 SV=2}	{vvi:100251227; K01537 E3.6.3.8 Ca2+-transporting ATPase 3.6.3.8 -}	{At4g29900; KOG0204 Calcium transporting ATPase P Inorganic ion transport and metabolism ;}	{GO:0000166; nucleotide binding; molecular_function GO:0016021; integral to membrane; cellular_component GO:0005516; calmodulin binding; molecular_function GO:0004930; G-protein coupled receptor activity; molecular_function GO:0046872; metal ion binding; molecular_function GO:0007186; G-protein coupled receptor protein signaling pathway; biological_process}	{XM_010278416.2; PREDICTED: Nelumbo nucifera calcium-transporting ATPase 10, plasma membrane-type (LOC104611393), transcript variant X2, mRNA}	{PF00122:E1-E2 ATPase PF00003:7 transmembrane sweet-taste receptor of 3 GCPR PF12515:Ca2+-ATPase N terminal autoinhibitory domain}
transcript_HQ_HBZL_transcript10581/f3p0/2001	2001	93	0	0	0	0	2.75	0	0	0	0	{XP_010257021.1; PREDICTED: laccase-12-like [Nelumbo nucifera]}	{sp|Q9SIY8|LAC5_ARATH; Laccase-5 OS=Arabidopsis thaliana GN=LAC5 PE=2 SV=1}	{nnu:104597263; K05909 E1.10.3.2 laccase 1.10.3.2 -}	{At2g40370; KOG1263 Multicopper oxidases Q Secondary metabolites biosynthesis, transport and catabolism ;}	{GO:0016491; oxidoreductase activity; molecular_function GO:0005507; copper ion binding; molecular_function GO:0055114; oxidation-reduction process; biological_process}	{XM_010258719.2; PREDICTED: Nelumbo nucifera laccase-12-like (LOC104597263), mRNA}	{PF07732:Multicopper oxidase PF00394:Multicopper oxidase PF07731:Multicopper oxidase}
transcript_HQ_HBZL_transcript10582/f3p0/1991	1991	222.57	0	0	2	0	6.61	0	0	0.07	0	{XP_010245116.1; PREDICTED: protein NRT1/ PTR FAMILY 5.10-like isoform X2 [Nelumbo nucifera]}	{sp|Q0WP01|PTR9_ARATH; Protein NRT1/ PTR FAMILY 5.10 OS=Arabidopsis thaliana GN=NPF5.10 PE=2 SV=1}	{pper:PRUPE_ppa003472mg; K14638 SLC15A3_4, PHT solute carrier family 15 (peptide/histidine transporter), member 3/4 - -}	{At1g22540; KOG1237 H+/oligopeptide symporter E Amino acid transport and metabolism ;}	{GO:0006810; transport; biological_process GO:0016020; membrane; cellular_component GO:0005215; NA}	{XM_006356442.2; PREDICTED: Solanum tuberosum protein NRT1/ PTR FAMILY 5.10-like (LOC102597245), mRNA}	{PF00854:POT family}
transcript_HQ_HBZL_transcript10591/f2p0/1997	1997	163.62	25.92	2.01	3	3	4.84	0.73	0.06	0.1	0.09	{XP_010261190.1; PREDICTED: histone acetyltransferase KAT6A [Nelumbo nucifera]}	{sp|Q5ZM30|RPR1A_CHICK; Regulation of nuclear pre-mRNA domain-containing protein 1A OS=Gallus gallus GN=RPRD1A PE=2 SV=1}	{cic:CICLE_v10027075mg; K15559 RTT103 regulator of Ty1 transposition protein 103 - -}	{At5g65180; KOG2669 Regulator of nuclear mRNA A RNA processing and modification ;}	{GO:0006810; transport; biological_process GO:0003860; 3-hydroxyisobutyryl-CoA hydrolase activity; molecular_function GO:0005215; NA}	{NA}	{PF16113:Enoyl-CoA hydratase/isomerase PF02321:Outer membrane efflux protein}
transcript_HQ_HBZL_transcript10592/f2p0/1999	2008	580.54	55.89	88.2	93.16	96.36	17.08	1.56	2.59	3.09	2.93	{XP_010246568.1; PREDICTED: transcription factor E2FA [Nelumbo nucifera]}	{sp|Q9FNY0|E2FA_ARATH; Transcription factor E2FA OS=Arabidopsis thaliana GN=E2FA PE=1 SV=1}	{nnu:104589827; K06620 E2F3 transcription factor E2F3 - ko04110; Cellular Processes; Cell growth and death; Cell cycle | ko05200; Human Diseases; Cancers: Overview; Pathways in cancer | ko05206; Human Diseases; Cancers: Overview; MicroRNAs in cancer | ko05212; Human Diseases; Cancers: Specific types; Pancreatic cancer | ko05214; Human Diseases; Cancers: Specific types; Glioma | ko05220; Human Dis…	{At2g36010; KOG2577 Transcription factor E2F/dimerization partner (TDP) K Transcription ;}	{GO:0005737; cytoplasm; cellular_component GO:0051301; cell division; biological_process GO:0090529; NA GO:0046983; protein dimerization activity; molecular_function GO:0006355; regulation of transcription, DNA-dependent; biological_process GO:0045947; negative regulation of translational initiation; biological_process GO:0005667; transcription factor complex; cellular_component GO:0008017; micro…	{XM_010248266.2; PREDICTED: Nelumbo nucifera transcription factor E2FA (LOC104589827), mRNA}	{PF16421:E2F transcription factor CC-MB domain PF02319:E2F/DP family winged-helix DNA-binding domain PF05456:Eukaryotic translation initiation factor 4E binding protein (EIF4EBP) PF06005:Protein of unknown function (DUF904) PF07160:Protein of unknown function (DUF1395)}
transcript_HQ_HBZL_transcript10595/f4p0/1999	1999	196.28	0	0	0	0	5.8	0	0	0	0	{XP_007222772.1; hypothetical protein PRUPE_ppa006558mg [Prunus persica]}	{sp|Q9LIR8|FBK67_ARATH; F-box/kelch-repeat protein At3g23880 OS=Arabidopsis thaliana GN=At3g23880 PE=2 SV=1}	{sot:102582344; - - - - -}	{NA}	{GO:0005515; protein binding; molecular_function}	{AC253847.1; Aquilegia coerulea clone COL01-D05, complete sequence}	{PF00646:F-box domain PF12937:F-box-like}
transcript_HQ_HBZL_transcript10596/f2p0/1992	1991	120.15	0	0	0	0	3.57	0	0	0	0	{XP_010663626.1; PREDICTED: LEAF RUST 10 DISEASE-RESISTANCE LOCUS RECEPTOR-LIKE PROTEIN KINASE-like 2.1 isoform X3 [Vitis vinifera]}	{sp|F4HQ23|LRL27_ARATH; LEAF RUST 10 DISEASE-RESISTANCE LOCUS RECEPTOR-LIKE PROTEIN KINASE-like 2.7 OS=Arabidopsis thaliana GN=LRK10L-2.7 PE=3 SV=2}	{vvi:100246408; - - - - -}	{At5g38260; KOG1187 Serine/threonine protein kinase T Signal transduction mechanisms ;}	{GO:0006468; protein phosphorylation; biological_process GO:0004672; protein kinase activity; molecular_function GO:0030247; polysaccharide binding; molecular_function GO:0005524; ATP binding; molecular_function}	{AM447234.2; Vitis vinifera contig VV78X023931.9, whole genome shotgun sequence}	{PF13947:Wall-associated receptor kinase galacturonan-binding PF07714:Protein tyrosine kinase PF00069:Protein kinase domain}
transcript_HQ_HBZL_transcript10597/f8p0/2011	2009	1878.59	1	4.18	15.17	15.37	55.24	0.03	0.12	0.5	0.47	{XP_010279326.1; PREDICTED: LEAF RUST 10 DISEASE-RESISTANCE LOCUS RECEPTOR-LIKE PROTEIN KINASE-like 2.1 [Nelumbo nucifera]}	{sp|Q9FF31|LRL21_ARATH; LEAF RUST 10 DISEASE-RESISTANCE LOCUS RECEPTOR-LIKE PROTEIN KINASE-like 2.1 OS=Arabidopsis thaliana GN=LRK10L-2.1 PE=3 SV=1}	{egu:105045620; - - - - -}	{At5g38260; KOG1187 Serine/threonine protein kinase T Signal transduction mechanisms ;}	{GO:0005524; ATP binding; molecular_function GO:0004672; protein kinase activity; molecular_function GO:0006468; protein phosphorylation; biological_process}	{XM_018587961.1; PREDICTED: Raphanus sativus LEAF RUST 10 DISEASE-RESISTANCE LOCUS RECEPTOR-LIKE PROTEIN KINASE-like 2.7 (LOC108815320), mRNA}	{PF07714:Protein tyrosine kinase PF00069:Protein kinase domain}
transcript_HQ_HBZL_transcript105/f2p0/5898	5900	1043	2080	660	609	797	9.6	18.12	6.07	6.29	7.56	{XP_010242545.1; PREDICTED: piezo-type mechanosensitive ion channel homolog isoform X3 [Nelumbo nucifera]}	{sp|F4IN58|PIEZO_ARATH; Piezo-type mechanosensitive ion channel homolog OS=Arabidopsis thaliana GN=At2g48060/At2g48040/At2g48050 PE=2 SV=1}	{rcu:8285854; - - - - -}	{At2g48050; KOG1893 Uncharacterized conserved protein S Function unknown ;}	{NA}	{XM_010244244.1; PREDICTED: Nelumbo nucifera piezo-type mechanosensitive ion channel homolog (LOC104586869), transcript variant X4, mRNA}	{NA}
transcript_HQ_HBZL_transcript10604/f3p0/1990	1990	73841.4	0	0	0	0	2194.93	0	0	0	0	{BAS99152.1; Os06g0681400, partial [Oryza sativa Japonica Group]}	{sp|P0CG71|UBIQ1_CAEEL; Polyubiquitin-A OS=Caenorhabditis elegans GN=ubq-1 PE=3 SV=1}	{jcu:105634824; K08770 UBC ubiquitin C - ko03320; Organismal Systems; Endocrine system; PPAR signaling pathway}	{CE01921; KOG0001 Ubiquitin and ubiquitin-like proteins OR Posttranslational modification, protein turnover, chaperones ; General function prediction only ;}	{GO:0005515; protein binding; molecular_function}	{XM_012217748.1; PREDICTED: Jatropha curcas polyubiquitin-like (LOC105634824), mRNA}	{PF14560:Ubiquitin-like domain PF00240:Ubiquitin family}
transcript_HQ_HBZL_transcript10605/f2p0/1986	1986	253.84	0	0	0	0	7.56	0	0	0	0	{ACH87168.1; senescence-related protein [Camellia sinensis]}	{sp|O48832|ERD7_ARATH; Protein EARLY-RESPONSIVE TO DEHYDRATION 7, chloroplastic OS=Arabidopsis thaliana GN=ERD7 PE=1 SV=1}	{egu:105044044; K19366 SPG20 spartin - ko04144; Cellular Processes; Transport and catabolism; Endocytosis}	{NA}	{NA}	{XM_002305476.2; Populus trichocarpa EARLY-RESPONSIVE TO DEHYDRATION 7 family protein (POPTR_0004s17980g) mRNA, complete cds}	{NA}
transcript_HQ_HBZL_transcript10606/f2p0/1991	1991	66.49	6	2.98	13.16	0	1.98	0.17	0.09	0.44	0	{XP_017637327.1; PREDICTED: LIM domain-containing protein WLIM1-like [Gossypium arboreum]}	{sp|Q94JX5|WLIM1_ARATH; LIM domain-containing protein WLIM1 OS=Arabidopsis thaliana GN=WLIM1 PE=1 SV=1}	{nnu:104595649; - - - - -}	{At1g10200; KOG1700 Regulatory protein MLP and related LIM proteins TZ Signal transduction mechanisms ; Cytoskeleton ;}	{GO:0008270; zinc ion binding; molecular_function}	{XM_002511404.2; PREDICTED: Ricinus communis LIM domain-containing protein WLIM1 (LOC8258110), mRNA}	{PF00412:LIM domain}
transcript_HQ_HBZL_transcript10607/f2p0/1989	1989	638.1	12.24	1.2	0	0	18.98	0.34	0.04	0	0	{XP_010269213.1; PREDICTED: uncharacterized WD repeat-containing protein C2A9.03-like isoform X1 [Nelumbo nucifera]}	{sp|Q9Y7K5|YGI3_SCHPO; Uncharacterized WD repeat-containing protein C2A9.03 OS=Schizosaccharomyces pombe (strain 972 / ATCC 24843) GN=SPBC2A9.03 PE=4 SV=2}	{sind:105158941; - - - - -}	{NA}	{GO:0005515; protein binding; molecular_function}	{NA}	{PF00400:WD domain, G-beta repeat}
transcript_HQ_HBZL_transcript10609/f2p0/1996	1996	431.7	0	0	0	0	12.79	0	0	0	0	{XP_010644548.1; PREDICTED: premnaspirodiene oxygenase-like [Vitis vinifera]}	{sp|A6YIH8|C7D55_HYOMU; Premnaspirodiene oxygenase OS=Hyoscyamus muticus GN=CYP71D55 PE=1 SV=1}	{jcu:105633070; - - - - -}	{At3g26210; KOG0156 Cytochrome P450 CYP2 subfamily Q Secondary metabolites biosynthesis, transport and catabolism ;}	{GO:0005506; iron ion binding; molecular_function GO:0020037; heme binding; molecular_function GO:0016705; oxidoreductase activity, acting on paired donors, with incorporation or reduction of molecular oxygen; molecular_function GO:0055114; oxidation-reduction process; biological_process}	{KT390179.1; Sinopodophyllum hexandrum cytochrome P450 family 71 subfamily BE polypeptide 54 (CYP71BE54) mRNA, complete cds}	{PF00067:Cytochrome P450}
transcript_HQ_HBZL_transcript1060/f5p0/3787	3783	1811	6.73	227.32	190.8	188.14	26.61	0.09	3.34	3.15	2.85	{XP_010250461.1; PREDICTED: phytosulfokine receptor 1 [Nelumbo nucifera]}	{sp|Q8LPB4|PSKR1_DAUCA; Phytosulfokine receptor 1 OS=Daucus carota GN=PSKR PE=1 SV=1}	{nnu:104592703; - - - - -}	{NA}	{GO:0005524; ATP binding; molecular_function GO:0006468; protein phosphorylation; biological_process GO:0005515; protein binding; molecular_function GO:0004672; protein kinase activity; molecular_function}	{NA}	{PF13855:Leucine rich repeat PF00069:Protein kinase domain PF07714:Protein tyrosine kinase PF13516:Leucine Rich repeat PF00560:Leucine Rich Repeat}
transcript_HQ_HBZL_transcript10612/f2p0/1992	1992	176.13	0	0	0	0	5.23	0	0	0	0	{XP_018845846.1; PREDICTED: zeta-carotene desaturase, chloroplastic/chromoplastic [Juglans regia]}	{sp|Q9FV46|ZDS_TARER; Zeta-carotene desaturase, chloroplastic/chromoplastic OS=Tagetes erecta PE=2 SV=1}	{nnu:104596524; K00514 ZDS, crtQ zeta-carotene desaturase 1.3.5.6 ko00906; Metabolism; Metabolism of terpenoids and polyketides; Carotenoid biosynthesis}	{At3g04870; KOG0029 Amine oxidase Q Secondary metabolites biosynthesis, transport and catabolism ;}	{GO:0008033; tRNA processing; biological_process GO:0016491; oxidoreductase activity; molecular_function GO:0050151; oleate hydratase activity; molecular_function GO:0071949; FAD binding; molecular_function GO:0055114; oxidation-reduction process; biological_process GO:0050660; flavin adenine dinucleotide binding; molecular_function GO:0003857; 3-hydroxyacyl-CoA dehydrogenase activity; molecular_…	{XM_010257720.2; PREDICTED: Nelumbo nucifera zeta-carotene desaturase, chloroplastic/chromoplastic (LOC104596524), transcript variant X1, mRNA}	{PF07992:Pyridine nucleotide-disulphide oxidoreductase PF12831:FAD dependent oxidoreductase PF02737:3-hydroxyacyl-CoA dehydrogenase, NAD binding domain PF01266:FAD dependent oxidoreductase PF01593:Flavin containing amine oxidoreductase PF01494:FAD binding domain PF06100:MCRA family PF01134:Glucose inhibited division protein A PF00070:Pyridine nucleotide-disulphide oxidoreductase}
transcript_HQ_HBZL_transcript10613/f5p0/2005	2005	444	416.19	69.49	24.34	31.3	13.09	11.61	2.05	0.81	0.95	{XP_010264192.1; PREDICTED: IRK-interacting protein [Nelumbo nucifera]}	{sp|Q9LXU9|IRKI_ARATH; IRK-interacting protein OS=Arabidopsis thaliana GN=IRKI PE=1 SV=1}	{adu:107475498; - - - - -}	{NA}	{NA}	{XM_011095063.1; PREDICTED: Sesamum indicum uncharacterized LOC105173356 (LOC105173356), transcript variant X2, mRNA}	{NA}
transcript_HQ_HBZL_transcript10614/f6p0/2029	2029	4202.41	0	0	0	0	122.2	0	0	0	0	{XP_008803862.2; PREDICTED: diacylglycerol kinase 5-like isoform X1 [Phoenix dactylifera]}	{sp|Q9C5E5|DGK5_ARATH; Diacylglycerol kinase 5 OS=Arabidopsis thaliana GN=DGK5 PE=2 SV=1}	{egu:105045440; K00901 dgkA, DGK diacylglycerol kinase (ATP) 2.7.1.107 ko00561; Metabolism; Lipid metabolism; Glycerolipid metabolism | ko00564; Metabolism; Lipid metabolism; Glycerophospholipid metabolism | ko04070; Environmental Information Processing; Signal transduction; Phosphatidylinositol signaling system | ko04072; Environmental Information Processing; Signal transduction; Phospholipase D…	{At2g20900; KOG1169 Diacylglycerol kinase IT Lipid transport and metabolism ; Signal transduction mechanisms ;}	{GO:0006741; NADP biosynthetic process; biological_process GO:0008152; NA GO:0016301; kinase activity; molecular_function GO:0003951; NAD+ kinase activity; molecular_function GO:0004143; diacylglycerol kinase activity; molecular_function GO:0007205; activation of protein kinase C activity by G-protein coupled receptor protein signaling pathway; biological_process}	{XM_010279611.2; PREDICTED: Nelumbo nucifera diacylglycerol kinase 5-like (LOC104612253), transcript variant X2, mRNA}	{PF01513:ATP-NAD kinase PF00781:Diacylglycerol kinase catalytic domain PF00609:Diacylglycerol kinase accessory domain}
transcript_HQ_HBZL_transcript10615/f2p0/2032	2033	402	0	0	1.94	0	11.66	0	0	0.06	0	{XP_010271630.1; PREDICTED: rho GTPase-activating protein 5-like [Nelumbo nucifera]}	{sp|Q9FMR1|RGAP1_ARATH; Rho GTPase-activating protein 1 OS=Arabidopsis thaliana GN=ROPGAP1 PE=2 SV=1}	{nnu:104588974; - - - - -}	{At5g22400; KOG4270 GTPase-activator protein T Signal transduction mechanisms ;}	{GO:0007165; signal transduction; biological_process}	{XM_010273328.2; PREDICTED: Nelumbo nucifera rho GTPase-activating protein 5-like (LOC104607650), mRNA}	{PF00620:RhoGAP domain}
transcript_HQ_HBZL_transcript10618/f8p0/2059	2059	1212.31	0	18.98	117.14	101.78	34.67	0	0.54	3.77	3	{XP_002266145.1; PREDICTED: inositol phosphorylceramide glucuronosyltransferase 1 [Vitis vinifera]}	{sp|Q8GWB7|GUX6_ARATH; Inositol phosphorylceramide glucuronosyltransferase 1 OS=Arabidopsis thaliana GN=IPUT1 PE=1 SV=1}	{egu:105046138; - - - - -}	{At5g18480_1; KOG1950 Glycosyl transferase, family 8 - glycogenin G Carbohydrate transport and metabolism ;}	{GO:0006486; protein glycosylation; biological_process GO:0016757; transferase activity, transferring glycosyl groups; molecular_function}	{XM_018977216.1; PREDICTED: Juglans regia inositol phosphorylceramide glucuronosyltransferase 1 (LOC109000371), mRNA}	{PF01501:Glycosyl transferase family 8 PF11051:Mannosyltransferase putative}
transcript_HQ_HBZL_transcript10622/f35p0/1980	1980	6541.67	3	1.01	0	0	195.57	0.08	0.03	0	0	{XP_010267266.1; PREDICTED: phospho-2-dehydro-3-deoxyheptonate aldolase 2, chloroplastic-like [Nelumbo nucifera]}	{sp|P27608|AROF_TOBAC; Phospho-2-dehydro-3-deoxyheptonate aldolase 1, chloroplastic OS=Nicotiana tabacum GN=DHAPS-1 PE=2 SV=1}	{nnu:104604561; K01626 E2.5.1.54, aroF, aroG, aroH 3-deoxy-7-phosphoheptulonate synthase 2.5.1.54 ko01230; Metabolism; Global and overview maps; Biosynthesis of amino acids | ko00400; Metabolism; Amino acid metabolism; Phenylalanine, tyrosine and tryptophan biosynthesis | ko02024; Cellular Processes; Cellular community - prokaryotes; Quorum sensing}	{NA}	{GO:0009073; aromatic amino acid family biosynthetic process; biological_process GO:0003849; 3-deoxy-7-phosphoheptulonate synthase activity; molecular_function}	{XM_010268964.2; PREDICTED: Nelumbo nucifera phospho-2-dehydro-3-deoxyheptonate aldolase 2, chloroplastic-like (LOC104604561), mRNA}	{PF01474:Class-II DAHP synthetase family}
transcript_HQ_HBZL_transcript10623/f39p0/1825	1825	4710.67	0	0	0	0	154.57	0	0	0	0	{CAA52343.1; cellulase, partial [Sambucus nigra]}	{sp|P22503|GUN_PHAVU; Endoglucanase OS=Phaseolus vulgaris PE=2 SV=2}	{cic:CICLE_v10023813mg; - - - - -}	{NA}	{GO:0005975; carbohydrate metabolic process; biological_process GO:0004553; hydrolase activity, hydrolyzing O-glycosyl compounds; molecular_function}	{XM_016627615.1; PREDICTED: Nicotiana tabacum endoglucanase 18-like (LOC107803827), mRNA}	{PF00759:Glycosyl hydrolase family 9}
transcript_HQ_HBZL_transcript10625/f11p0/1994	1994	406	0	0	0	0	12.04	0	0	0	0	{XP_006449875.1; hypothetical protein CICLE_v10014770mg [Citrus clementina]}	{sp|Q8LG88|TDT_ARATH; Tonoplast dicarboxylate transporter OS=Arabidopsis thaliana GN=TDT PE=2 SV=2}	{pxb:103943766; K14445 SLC13A2_3_5 solute carrier family 13 (sodium-dependent dicarboxylate transporter), member 2/3/5 - -}	{At5g47560; KOG1281 Na+/dicarboxylate, Na+/tricarboxylate and phosphate transporters P Inorganic ion transport and metabolism ;}	{GO:0016021; integral to membrane; cellular_component GO:0006814; sodium ion transport; biological_process GO:0055085; transmembrane transport; biological_process GO:0016020; membrane; cellular_component GO:0005215; NA}	{XM_006449812.1; Citrus clementina hypothetical protein (CICLE_v10014770mg) mRNA, complete cds}	{PF00939:Sodium:sulfate symporter transmembrane region PF03600:Citrate transporter}
transcript_HQ_HBZL_transcript10626/f4p0/2017	2017	235.65	1	0	1.68	0	6.9	0.03	0	0.06	0	{XP_010258207.1; PREDICTED: chorismate mutase 3, chloroplastic-like [Nelumbo nucifera]}	{sp|Q9C544|CM3_ARATH; Chorismate mutase 3, chloroplastic OS=Arabidopsis thaliana GN=CM3 PE=1 SV=1}	{nnu:104598032; K01850 E5.4.99.5 chorismate mutase 5.4.99.5 ko01230; Metabolism; Global and overview maps; Biosynthesis of amino acids | ko00400; Metabolism; Amino acid metabolism; Phenylalanine, tyrosine and tryptophan biosynthesis}	{At1g69370; KOG0795 Chorismate mutase E Amino acid transport and metabolism ;}	{NA}	{XM_010260539.2; PREDICTED: Nelumbo nucifera chorismate mutase 1, chloroplastic-like (LOC104598462), transcript variant X1, mRNA}	{NA}
transcript_HQ_HBZL_transcript10627/f3p0/1970	1970	215.81	0	0	0	0	6.49	0	0	0	0	{XP_010258617.1; PREDICTED: ABC transporter G family member 11-like [Nelumbo nucifera]}	{sp|Q8RXN0|AB11G_ARATH; ABC transporter G family member 11 OS=Arabidopsis thaliana GN=ABCG11 PE=1 SV=1}	{nnu:104598308; - - - - -}	{At1g51500; KOG0061 Transporter, ABC superfamily (Breast cancer resistance protein) Q Secondary metabolites biosynthesis, transport and catabolism ;}	{NA}	{AM432160.2; Vitis vinifera contig VV78X214932.8, whole genome shotgun sequence}	{NA}
transcript_HQ_HBZL_transcript10628/f3p0/2031	2031	861.97	0	0	15.87	9.88	25.04	0	0	0.52	0.3	{XP_019056026.1; PREDICTED: protein BONZAI 3 [Nelumbo nucifera]}	{sp|Q5XQC7|BON3_ARATH; Protein BONZAI 3 OS=Arabidopsis thaliana GN=BON3 PE=1 SV=1}	{nnu:104586890; - - - - -}	{At5g07300; KOG1327 Copine T Signal transduction mechanisms ;}	{GO:0005515; protein binding; molecular_function}	{XM_008813482.2; PREDICTED: Phoenix dactylifera protein BONZAI 3-like (LOC103722797), transcript variant X2, mRNA}	{PF00168:C2 domain}
transcript_HQ_HBZL_transcript10629/f6p0/2022	2022	644.08	0	0	0	0	18.8	0	0	0	0	{XP_010267128.1; PREDICTED: hexokinase-1-like [Nelumbo nucifera]}	{sp|Q9SEK3|HXK1_SPIOL; Hexokinase-1 OS=Spinacia oleracea GN=HXK1 PE=2 SV=1}	{nnu:104592043; K00844 HK hexokinase 2.7.1.1 ko01200; Metabolism; Global and overview maps; Carbon metabolism | ko00010; Metabolism; Carbohydrate metabolism; Glycolysis / Gluconeogenesis | ko00051; Metabolism; Carbohydrate metabolism; Fructose and mannose metabolism | ko00052; Metabolism; Carbohydrate metabolism; Galactose metabolism | ko00500; Metabolism; Carbohydrate metabolism; Starch and sucr…	{At2g19860; KOG1369 Hexokinase G Carbohydrate transport and metabolism ;}	{GO:0005524; ATP binding; molecular_function GO:0016773; phosphotransferase activity, alcohol group as acceptor; molecular_function GO:0005975; carbohydrate metabolic process; biological_process}	{KJ417437.1; Manihot esculenta hexokinase (HXK5) mRNA, complete cds}	{PF00349:Hexokinase PF03727:Hexokinase}
transcript_HQ_HBZL_transcript10630/f2p0/2003	2003	938.49	27.57	13.19	0	0	27.69	0.77	0.39	0	0	{XP_010241464.1; PREDICTED: CBL-interacting serine/threonine-protein kinase 1 [Nelumbo nucifera]}	{sp|Q8RWC9|CIPK1_ARATH; CBL-interacting serine/threonine-protein kinase 1 OS=Arabidopsis thaliana GN=CIPK1 PE=1 SV=2}	{egr:104434079; K07198 PRKAA, AMPK 5'-AMP-activated protein kinase, catalytic alpha subunit 2.7.11.11 ko04371; Environmental Information Processing; Signal transduction; Apelin signaling pathway | ko04068; Environmental Information Processing; Signal transduction; FoxO signaling pathway | ko04151; Environmental Information Processing; Signal transduction; PI3K-Akt signaling pathway | ko04152; Env…	{At3g17510; KOG0583 Serine/threonine protein kinase T Signal transduction mechanisms ;}	{GO:0006364; rRNA processing; biological_process GO:0016773; phosphotransferase activity, alcohol group as acceptor; molecular_function GO:0005524; ATP binding; molecular_function GO:0016020; membrane; cellular_component GO:0004672; protein kinase activity; molecular_function GO:0007165; signal transduction; biological_process GO:0032040; small-subunit processome; cellular_component GO:0006468; p…	{XM_017789391.1; PREDICTED: Gossypium arboreum CBL-interacting serine/threonine-protein kinase 1-like (LOC108485539), transcript variant X1, mRNA}	{PF06293:Lipopolysaccharide kinase (Kdo/WaaP) family PF03822:NAF domain PF07714:Protein tyrosine kinase PF00069:Protein kinase domain PF04615:Utp14 protein}
transcript_HQ_HBZL_transcript10632/f3p0/1993	1993	288	0	52.46	90.81	129.66	8.55	0	1.56	3.04	3.97	{XP_017977704.1; PREDICTED: probable protein phosphatase 2C 5 isoform X1 [Theobroma cacao]}	{sp|O80492|P2C05_ARATH; Probable protein phosphatase 2C 5 OS=Arabidopsis thaliana GN=At1g09160 PE=2 SV=1}	{nnu:104598868; - - - - -}	{At1g09160; KOG0698 Serine/threonine protein phosphatase T Signal transduction mechanisms ;}	{GO:0003824; NA}	{XM_010247144.1; PREDICTED: Nelumbo nucifera probable protein phosphatase 2C 5 (LOC104588987), transcript variant X3, mRNA}	{PF07228:Stage II sporulation protein E (SpoIIE) PF00481:Protein phosphatase 2C}
transcript_HQ_HBZL_transcript10634/f2p0/1988	1989	342	0	3	5.28	9	10.17	0	0.09	0.18	0.28	{KDO83754.1; hypothetical protein CISIN_1g030351mg [Citrus sinensis]}	{sp|Q6NPF9|TRXY1_ARATH; Thioredoxin Y1, chloroplastic OS=Arabidopsis thaliana GN=At1g76760 PE=2 SV=1}	{cam:101492753; - - - - -}	{At1g76760; KOG0910 Thioredoxin-like protein O Posttranslational modification, protein turnover, chaperones ;}	{NA}	{HG975449.1; Solanum pennellii chromosome ch10, complete genome}	{NA}
transcript_HQ_HBZL_transcript10635/f3p0/2000	2000	967	0	0	1	0	28.58	0	0	0.03	0	{XP_010247965.1; PREDICTED: transcription factor PIF5-like isoform X1 [Nelumbo nucifera]}	{sp|Q8GZM7|PIF1_ARATH; Transcription factor PIF1 OS=Arabidopsis thaliana GN=PIF1 PE=1 SV=1}	{vvi:100262490; K16189 PIF4 phytochrome-interacting factor 4 - ko04075; Environmental Information Processing; Signal transduction; Plant hormone signal transduction}	{NA}	{GO:0046983; protein dimerization activity; molecular_function}	{XM_010906358.1; PREDICTED: Elaeis guineensis transcription factor PIF4 (LOC105032028), transcript variant X8, mRNA}	{PF00010:Helix-loop-helix DNA-binding domain}
transcript_HQ_HBZL_transcript10636/f2p0/1989	1989	96.01	1	0	0	2	2.86	0.03	0	0	0.06	{KCW54360.1; hypothetical protein EUGRSUZ_I00318 [Eucalyptus grandis]}	{sp|O48890|NRPB4_ARATH; DNA-directed RNA polymerase II subunit 4 OS=Arabidopsis thaliana GN=NRPB4 PE=1 SV=1}	{atr:18437716; K03012 RPB4, POLR2D DNA-directed RNA polymerase II subunit RPB4 - ko00230; Metabolism; Nucleotide metabolism; Purine metabolism | ko00240; Metabolism; Nucleotide metabolism; Pyrimidine metabolism | ko03020; Genetic Information Processing; Transcription; RNA polymerase | ko05016; Human Diseases; Neurodegenerative diseases; Huntington's disease | ko05169; Human Diseases; Infectious d…	{At5g09920; KOG2351 RNA polymerase II, fourth largest subunit K Transcription ;}	{GO:0003899; DNA-directed RNA polymerase activity; molecular_function GO:0006351; transcription, DNA-dependent; biological_process}	{XM_006494675.2; PREDICTED: Citrus sinensis DNA-directed RNA polymerase II subunit 4 (LOC102621370), transcript variant X2, mRNA}	{PF03874:RNA polymerase Rpb4}
transcript_HQ_HBZL_transcript10638/f5p0/1996	1996	642.28	0	0	0	0	19.03	0	0	0	0	{XP_008782631.1; PREDICTED: CBL-interacting protein kinase 18-like [Phoenix dactylifera]}	{sp|Q7X996|CIPK2_ORYSJ; CBL-interacting protein kinase 2 OS=Oryza sativa subsp. japonica GN=CIPK2 PE=2 SV=1}	{pda:103702112; K07198 PRKAA, AMPK 5'-AMP-activated protein kinase, catalytic alpha subunit 2.7.11.11 ko04371; Environmental Information Processing; Signal transduction; Apelin signaling pathway | ko04068; Environmental Information Processing; Signal transduction; FoxO signaling pathway | ko04151; Environmental Information Processing; Signal transduction; PI3K-Akt signaling pathway | ko04152; Env…	{At5g07070; KOG0583 Serine/threonine protein kinase T Signal transduction mechanisms ;}	{GO:0046789; host cell surface receptor binding; molecular_function GO:0004672; protein kinase activity; molecular_function GO:0016020; membrane; cellular_component GO:0019031; viral envelope; cellular_component GO:0005524; ATP binding; molecular_function GO:0019064; viral envelope fusion with host membrane; biological_process GO:0016773; phosphotransferase activity, alcohol group as acceptor; mo…	{XM_010922812.2; PREDICTED: Elaeis guineensis CBL-interacting protein kinase 18-like (LOC105044796), mRNA}	{PF03822:NAF domain PF00509:Haemagglutinin PF06293:Lipopolysaccharide kinase (Kdo/WaaP) family PF07714:Protein tyrosine kinase PF00069:Protein kinase domain}
transcript_HQ_HBZL_transcript1063/f5p0/3721	3721	1864	55.38	7.76	0	0	27.88	0.78	0.12	0	0	{XP_010661562.1; PREDICTED: homeobox-leucine zipper protein ANTHOCYANINLESS 2 isoform X2 [Vitis vinifera]}	{sp|Q0WV12|ANL2_ARATH; Homeobox-leucine zipper protein ANTHOCYANINLESS 2 OS=Arabidopsis thaliana GN=ANL2 PE=2 SV=1}	{nnu:104596153; K09338 HD-ZIP homeobox-leucine zipper protein - -}	{NA}	{GO:0003677; DNA binding; molecular_function GO:0008289; lipid binding; molecular_function GO:0006355; regulation of transcription, DNA-dependent; biological_process GO:0019901; protein kinase binding; molecular_function}	{XM_011036795.1; PREDICTED: Populus euphratica homeobox-leucine zipper protein ANTHOCYANINLESS 2 (LOC105133017), mRNA}	{PF00046:Homeobox domain PF01852:START domain PF15898:cGMP-dependent protein kinase interacting domain PF05920:Homeobox KN domain}
transcript_HQ_HBZL_transcript10640/f2p0/2022	2020	361	0	0	0	0	10.55	0	0	0	0	{XP_010268380.1; PREDICTED: hexokinase-2, chloroplastic [Nelumbo nucifera]}	{sp|Q6Q8A5|HXK2_TOBAC; Hexokinase-2, chloroplastic OS=Nicotiana tabacum GN=HXK2 PE=2 SV=1}	{nnu:104605346; K00844 HK hexokinase 2.7.1.1 ko01200; Metabolism; Global and overview maps; Carbon metabolism | ko00010; Metabolism; Carbohydrate metabolism; Glycolysis / Gluconeogenesis | ko00051; Metabolism; Carbohydrate metabolism; Fructose and mannose metabolism | ko00052; Metabolism; Carbohydrate metabolism; Galactose metabolism | ko00500; Metabolism; Carbohydrate metabolism; Starch and sucr…	{At1g47840; KOG1369 Hexokinase G Carbohydrate transport and metabolism ;}	{GO:0005524; ATP binding; molecular_function GO:0016773; phosphotransferase activity, alcohol group as acceptor; molecular_function GO:0005975; carbohydrate metabolic process; biological_process}	{XM_019199069.1; PREDICTED: Nelumbo nucifera hexokinase-2, chloroplastic (LOC104605346), transcript variant X3, mRNA}	{PF03727:Hexokinase PF00349:Hexokinase}
transcript_HQ_HBZL_transcript10641/f5p0/2002	2002	4918.28	56.1	0	0	0	145.2	1.57	0	0	0	{XP_010249715.1; PREDICTED: uncharacterized protein LOC104592187 [Nelumbo nucifera]}	{NA}	{nnu:104592187; - - - - -}	{NA}	{GO:0016021; integral to membrane; cellular_component}	{XM_018990019.1; PREDICTED: Juglans regia uncharacterized LOC109009519 (LOC109009519), transcript variant X2, mRNA}	{PF01925:Sulfite exporter TauE/SafE}
transcript_HQ_HBZL_transcript10642/f7p0/2013	2013	1458.6	0	0	0	0	42.8	0	0	0	0	{OMO54486.1; hypothetical protein CCACVL1_27767 [Corchorus capsularis]}	{sp|Q8RWZ5|SD25_ARATH; G-type lectin S-receptor-like serine/threonine-protein kinase SD2-5 OS=Arabidopsis thaliana GN=SD25 PE=1 SV=1}	{sind:105163672; - - - - -}	{NA}	{GO:0005524; ATP binding; molecular_function GO:0006468; protein phosphorylation; biological_process GO:0004672; protein kinase activity; molecular_function}	{NA}	{PF00069:Protein kinase domain PF07714:Protein tyrosine kinase}
transcript_HQ_HBZL_transcript10643/f2p0/1991	1991	87	3	80	103	105	2.58	0.08	2.37	3.45	3.22	{XP_018831174.1; PREDICTED: preprotein translocase subunit SCY1, chloroplastic [Juglans regia]}	{sp|Q38885|SCY1_ARATH; Preprotein translocase subunit SCY1, chloroplastic OS=Arabidopsis thaliana GN=SCY1 PE=1 SV=2}	{csv:101222431; K10956 SEC61A protein transport protein SEC61 subunit alpha - ko03060; Genetic Information Processing; Folding, sorting and degradation; Protein export | ko04141; Genetic Information Processing; Folding, sorting and degradation; Protein processing in endoplasmic reticulum | ko04145; Cellular Processes; Transport and catabolism; Phagosome | ko05110; Human Diseases; Infectious disea…	{NA}	{GO:0015031; protein transport; biological_process GO:0016020; membrane; cellular_component}	{XM_008791485.1; PREDICTED: Phoenix dactylifera preprotein translocase subunit SECY, chloroplastic (LOC103707116), mRNA}	{PF12537:The Golgi pH Regulator (GPHR) Family N-terminal PF00344:SecY translocase}
transcript_HQ_HBZL_transcript10644/f22p0/1992	1993	4178.88	0	0	1	0	124	0	0	0.03	0	{XP_002276507.1; PREDICTED: protein IQ-DOMAIN 14 [Vitis vinifera]}	{sp|Q8LPG9|IQD14_ARATH; Protein IQ-DOMAIN 14 OS=Arabidopsis thaliana GN=IQD14 PE=1 SV=1}	{pmum:103322364; - - - - -}	{NA}	{GO:0005515; protein binding; molecular_function}	{NA}	{PF00612:IQ calmodulin-binding motif}
transcript_HQ_HBZL_transcript10645/f2p0/1999	1999	31	2	5	27	19	0.92	0.06	0.15	0.9	0.58	{XP_002270292.2; PREDICTED: vacuolar protein 8 [Vitis vinifera]}	{sp|O22193|PUB4_ARATH; U-box domain-containing protein 4 OS=Arabidopsis thaliana GN=PUB4 PE=1 SV=3}	{vvi:100262714; - - - - -}	{At1g61350; KOG0167 FOG: Armadillo/beta-catenin-like repeats S Function unknown ;}	{GO:0016820; hydrolase activity, acting on acid anhydrides, catalyzing transmembrane movement of substances; molecular_function GO:0000221; vacuolar proton-transporting V-type ATPase, V1 domain; cellular_component GO:0015991; ATP hydrolysis coupled proton transport; biological_process GO:0005515; protein binding; molecular_function}	{NA}	{PF11698:V-ATPase subunit H PF00514:Armadillo/beta-catenin-like repeat}
transcript_HQ_HBZL_transcript10649/f2p0/1989	1989	230	1	16.41	11.07	16.98	6.84	0.03	0.49	0.37	0.52	{XP_008811208.1; PREDICTED: actin-related protein 4 [Phoenix dactylifera]}	{sp|Q84M92|ARP4_ARATH; Actin-related protein 4 OS=Arabidopsis thaliana GN=ARP4 PE=1 SV=1}	{pda:103722428; K11340 ACTL6A, INO80K actin-like protein 6A - -}	{At1g18450; KOG0679 Actin-related protein - Arp4p/Act3p Z Cytoskeleton ;}	{GO:0000902; cell morphogenesis; biological_process}	{XM_010262160.2; PREDICTED: Nelumbo nucifera actin-related protein 4 (LOC104599561), mRNA}	{PF06723:MreB/Mbl protein}
transcript_HQ_HBZL_transcript1064/f2p0/3718	3718	385.54	22.93	20.95	11	13.44	5.77	0.32	0.31	0.19	0.21	{OAY75526.1; Molybdate-anion transporter [Ananas comosus]}	{sp|Q921Y4|MFSD5_MOUSE; Molybdate-anion transporter OS=Mus musculus GN=Mfsd5 PE=2 SV=1}	{nnu:104593935; - - - - -}	{At4g27720; KOG4332 Predicted sugar transporter G Carbohydrate transport and metabolism ;}	{GO:0016020; membrane; cellular_component GO:0015689; molybdate ion transport; biological_process GO:0016021; integral to membrane; cellular_component GO:0015098; molybdate ion transmembrane transporter activity; molecular_function}	{XM_012231201.1; PREDICTED: Jatropha curcas molybdate-anion transporter (LOC105645571), mRNA}	{PF05631:Sugar-tranasporters, 12 TM PF07155:ECF-type riboflavin transporter, S component}
transcript_HQ_HBZL_transcript10653/f10p0/1990	1990	2038.33	0	0	0	0	60.59	0	0	0	0	{XP_007211824.1; hypothetical protein PRUPE_ppa004375mg [Prunus persica]}	{sp|O04057|ASPR_CUCPE; Aspartic proteinase OS=Cucurbita pepo PE=2 SV=1}	{nnu:104594044; K08245 E3.4.23.40 phytepsin 3.4.23.40 -}	{At1g11910; KOG1339 Aspartyl protease O Posttranslational modification, protein turnover, chaperones ;}	{GO:0006629; lipid metabolic process; biological_process}	{FQ395832.1; Vitis vinifera clone SS0AFA13YM20}	{PF05184:Saposin-like type B, region 1}
transcript_HQ_HBZL_transcript10656/f12p0/1987	1987	2635.67	0	0	0	0	78.48	0	0	0	0	{XP_010248668.1; PREDICTED: uncharacterized protein LOC104591513 [Nelumbo nucifera]}	{NA}	{nnu:104591513; - - - - -}	{NA}	{NA}	{XM_010652201.2; PREDICTED: Vitis vinifera uncharacterized LOC100243914 (LOC100243914), transcript variant X2, mRNA}	{NA}
transcript_HQ_HBZL_transcript10657/f2p0/2052	2052	1139.99	8	26.3	36.37	44.53	32.73	0.22	0.75	1.18	1.32	{XP_010243455.1; PREDICTED: serine/threonine-protein kinase MHK isoform X1 [Nelumbo nucifera]}	{sp|P43294|MHK_ARATH; Serine/threonine-protein kinase MHK OS=Arabidopsis thaliana GN=MHK PE=2 SV=2}	{rcu:8286072; K08830 RAGE, MOK renal tumor antigen 2.7.11.22 -}	{At4g13020; KOG0661 MAPK related serine/threonine protein kinase T Signal transduction mechanisms ;}	{GO:0016773; phosphotransferase activity, alcohol group as acceptor; molecular_function GO:0005524; ATP binding; molecular_function GO:0006468; protein phosphorylation; biological_process GO:0016020; membrane; cellular_component GO:0004672; protein kinase activity; molecular_function}	{XM_010245153.2; PREDICTED: Nelumbo nucifera serine/threonine-protein kinase MHK (LOC104587514), transcript variant X1, mRNA}	{PF00069:Protein kinase domain PF07714:Protein tyrosine kinase PF06293:Lipopolysaccharide kinase (Kdo/WaaP) family}
transcript_HQ_HBZL_transcript1065/f2p0/3721	3721	542.39	0	0	0	0	8.11	0	0	0	0	{XP_006490382.2; PREDICTED: low-temperature-induced 65 kDa protein [Citrus sinensis]}	{sp|Q04980|LTI65_ARATH; Low-temperature-induced 65 kDa protein OS=Arabidopsis thaliana GN=LTI65 PE=2 SV=2}	{cic:CICLE_v10004574mg; - - - - -}	{NA}	{NA}	{NA}	{NA}
transcript_HQ_HBZL_transcript10660/f11p0/1992	1992	1215.79	0	207.78	411.43	490.31	36.1	0	6.16	13.76	15.03	{XP_010251124.1; PREDICTED: AP-1 complex subunit mu-2 [Nelumbo nucifera]}	{sp|O22715|AP1M2_ARATH; AP-1 complex subunit mu-2 OS=Arabidopsis thaliana GN=AP1M2 PE=1 SV=1}	{nnu:104593121; K12393 AP1M AP-1 complex subunit mu - ko04142; Cellular Processes; Transport and catabolism; Lysosome}	{At1g60780; KOG0937 Adaptor complexes medium subunit family U Intracellular trafficking, secretion, and vesicular transport ;}	{NA}	{XM_010252822.2; PREDICTED: Nelumbo nucifera AP-1 complex subunit mu-2 (LOC104593121), mRNA}	{NA}
transcript_HQ_HBZL_transcript10661/f111p0/1919	1919	3656.94	0	0	0	0	113.29	0	0	0	0	{XP_010270790.1; PREDICTED: probable polyamine oxidase 4 [Nelumbo nucifera]}	{sp|Q8H191|PAO4_ARATH; Probable polyamine oxidase 4 OS=Arabidopsis thaliana GN=PAO4 PE=1 SV=1}	{jcu:105636130; K17839 PAO4, PAO3, PAO2 polyamine oxidase [EC:1.5.3.17 1.5.3.-] 1.5.3.17,1.5.3.- ko00330; Metabolism; Amino acid metabolism; Arginine and proline metabolism | ko00410; Metabolism; Metabolism of other amino acids; beta-Alanine metabolism}	{At1g65840; KOG0029 Amine oxidase Q Secondary metabolites biosynthesis, transport and catabolism ;}	{GO:0008033; tRNA processing; biological_process GO:0016491; oxidoreductase activity; molecular_function GO:0055114; oxidation-reduction process; biological_process GO:0050660; flavin adenine dinucleotide binding; molecular_function GO:0071949; FAD binding; molecular_function}	{XM_010272488.2; PREDICTED: Nelumbo nucifera probable polyamine oxidase 4 (LOC104607001), mRNA}	{PF12831:FAD dependent oxidoreductase PF01134:Glucose inhibited division protein A PF00070:Pyridine nucleotide-disulphide oxidoreductase PF01494:FAD binding domain PF07992:Pyridine nucleotide-disulphide oxidoreductase PF01593:Flavin containing amine oxidoreductase PF01266:FAD dependent oxidoreductase}
transcript_HQ_HBZL_transcript10662/f5p0/1992	1992	336	67.96	47.14	0	1	9.98	1.91	1.4	0	0.03	{XP_010244797.1; PREDICTED: uncharacterized protein LOC104588534 [Nelumbo nucifera]}	{sp|Q91XF4|RN167_MOUSE; E3 ubiquitin-protein ligase RNF167 OS=Mus musculus GN=Rnf167 PE=2 SV=1}	{vvi:100263653; K16271 RLIM, RNF12 E3 ubiquitin-protein ligase RLIM 2.3.2.27 -}	{At5g45290; KOG0800 FOG: Predicted E3 ubiquitin ligase O Posttranslational modification, protein turnover, chaperones ;}	{GO:0005680; anaphase-promoting complex; cellular_component GO:0008270; zinc ion binding; molecular_function GO:0004842; ubiquitin-protein ligase activity; molecular_function GO:0046872; metal ion binding; molecular_function GO:0005515; protein binding; molecular_function}	{XM_002266397.4; PREDICTED: Vitis vinifera E3 ubiquitin-protein ligase RLIM (LOC100263653), mRNA}	{PF14634:zinc-RING finger domain PF13639:Ring finger domain PF17123:RING-like zinc finger PF00097:Zinc finger, C3HC4 type (RING finger) PF12861:Anaphase-promoting complex subunit 11 RING-H2 finger PF17122:Zinc-finger PF12678:RING-H2 zinc finger domain}
transcript_HQ_HBZL_transcript10663/f2p0/2026	2027	1714.16	0	51.94	227.42	52.73	49.9	0	1.51	7.46	1.58	{XP_017638224.1; PREDICTED: acid beta-fructofuranosidase-like [Gossypium arboreum]}	{sp|P80065|INVB_DAUCA; Beta-fructofuranosidase, soluble isoenzyme I OS=Daucus carota GN=INV*DC4 PE=1 SV=2}	{nnu:104598577; K01193 INV, sacA beta-fructofuranosidase 3.2.1.26 ko00052; Metabolism; Carbohydrate metabolism; Galactose metabolism | ko00500; Metabolism; Carbohydrate metabolism; Starch and sucrose metabolism}	{At1g62660; KOG0228 Beta-fructofuranosidase (invertase) G Carbohydrate transport and metabolism ;}	{GO:0004575; sucrose alpha-glucosidase activity; molecular_function GO:0004564; beta-fructofuranosidase activity; molecular_function}	{XM_018643651.1; PREDICTED: Pyrus x bretschneideri acid beta-fructofuranosidase-like (LOC103931897), mRNA}	{PF11837:Domain of unknown function (DUF3357)}
transcript_HQ_HBZL_transcript10665/f2p0/1999	1999	1195.06	0	0	0	0	35.34	0	0	0	0	{XP_006856031.1; PREDICTED: U1 small nuclear ribonucleoprotein 70 kDa [Amborella trichopoda]}	{sp|Q42404|RU17_ARATH; U1 small nuclear ribonucleoprotein 70 kDa OS=Arabidopsis thaliana GN=RNU1 PE=1 SV=1}	{atr:18445843; K11093 SNRP70 U1 small nuclear ribonucleoprotein 70kDa - ko03040; Genetic Information Processing; Transcription; Spliceosome}	{At3g50670; KOG0113 U1 small nuclear ribonucleoprotein (RRM superfamily) A RNA processing and modification ;}	{GO:0003676; nucleic acid binding; molecular_function}	{XM_010921172.2; PREDICTED: Elaeis guineensis U1 small nuclear ribonucleoprotein 70 kDa-like (LOC105043591), mRNA}	{PF00076:RNA recognition motif. (a.k.a. RRM, RBD, or RNP domain)}
transcript_HQ_HBZL_transcript10668/f6p0/1987	1987	1574	9.03	3.98	0	0	46.87	0.25	0.12	0	0	{XP_010265173.1; PREDICTED: uncharacterized protein LOC104602986 isoform X2 [Nelumbo nucifera]}	{NA}	{nnu:104601677; K19476 IST1 vacuolar protein sorting-associated protein IST1 - ko04144; Cellular Processes; Transport and catabolism; Endocytosis}	{At1g13340; KOG2027 Spindle pole body protein Z Cytoskeleton ;}	{GO:0015031; protein transport; biological_process GO:0055114; oxidation-reduction process; biological_process GO:0015031; protein transport; biological_process GO:0016491; oxidoreductase activity; molecular_function GO:0042138; meiotic DNA double-strand break formation; biological_process}	{XM_011098885.1; PREDICTED: Sesamum indicum uncharacterized LOC105176162 (LOC105176162), mRNA}	{PF03398:Regulator of Vps4 activity in the MVB pathway PF00070:Pyridine nucleotide-disulphide oxidoreductase PF15091:Domain of unknown function (DUF4554) PF03398:Regulator of Vps4 activity in the MVB pathway}
transcript_HQ_HBZL_transcript1066/f6p0/3775	3776	1869.68	0	0	0	0	27.53	0	0	0	0	{XP_010276717.1; PREDICTED: calcium-transporting ATPase 10, plasma membrane-type [Nelumbo nucifera]}	{sp|Q9LF79|ACA8_ARATH; Calcium-transporting ATPase 8, plasma membrane-type OS=Arabidopsis thaliana GN=ACA8 PE=1 SV=1}	{vvi:100251227; K01537 E3.6.3.8 Ca2+-transporting ATPase 3.6.3.8 -}	{At4g29900; KOG0204 Calcium transporting ATPase P Inorganic ion transport and metabolism ;}	{GO:0000166; nucleotide binding; molecular_function GO:0005516; calmodulin binding; molecular_function GO:0046872; metal ion binding; molecular_function}	{XM_006474235.2; PREDICTED: Citrus sinensis calcium-transporting ATPase 8, plasma membrane-type (LOC102612349), transcript variant X7, mRNA}	{PF12515:Ca2+-ATPase N terminal autoinhibitory domain PF00122:E1-E2 ATPase}
transcript_HQ_HBZL_transcript10670/f2p0/1987	1987	398.1	32.61	32.59	39.42	59.23	11.85	0.92	0.97	1.32	1.82	{XP_015888835.1; PREDICTED: putative glucose-6-phosphate 1-epimerase [Ziziphus jujuba]}	{sp|Q40784|AAPC_CENCI; Putative glucose-6-phosphate 1-epimerase OS=Cenchrus ciliaris PE=2 SV=1}	{egu:105039683; K01792 E5.1.3.15 glucose-6-phosphate 1-epimerase 5.1.3.15 ko00010; Metabolism; Carbohydrate metabolism; Glycolysis / Gluconeogenesis}	{At5g57330; KOG1594 Uncharacterized enzymes related to aldose 1-epimerase G Carbohydrate transport and metabolism ;}	{GO:0016853; isomerase activity; molecular_function GO:0005975; carbohydrate metabolic process; biological_process}	{XM_018957788.1; PREDICTED: Juglans regia putative glucose-6-phosphate 1-epimerase (LOC108985482), mRNA}	{PF01263:Aldose 1-epimerase}
transcript_HQ_HBZL_transcript10671/f2p0/1988	1989	2744.92	0	0	0	0	81.64	0	0	0	0	{OMO70542.1; Aminotransferase, class I/classII [Corchorus capsularis]}	{sp|Q9LDV4|ALAT2_ARATH; Alanine aminotransferase 2, mitochondrial OS=Arabidopsis thaliana GN=ALAAT2 PE=2 SV=1}	{cit:102620489; K00814 GPT, ALT alanine transaminase 2.6.1.2 ko01200; Metabolism; Global and overview maps; Carbon metabolism | ko01210; Metabolism; Global and overview maps; 2-Oxocarboxylic acid metabolism | ko01230; Metabolism; Global and overview maps; Biosynthesis of amino acids | ko00710; Metabolism; Energy metabolism; Carbon fixation in photosynthetic organisms | ko00250; Metabolism; Amino …	{At1g72330; KOG0258 Alanine aminotransferase E Amino acid transport and metabolism ;}	{GO:0016829; lyase activity; molecular_function GO:0009058; biosynthetic process; biological_process GO:0030170; pyridoxal phosphate binding; molecular_function GO:0006520; cellular amino acid metabolic process; biological_process}	{XM_010275507.1; PREDICTED: Nelumbo nucifera alanine aminotransferase 2-like (LOC104609254), mRNA}	{PF01212:Beta-eliminating lyase PF00155:Aminotransferase class I and II}
transcript_HQ_HBZL_transcript10674/f4p0/1992	1992	184.6	0	21.93	32	10.31	5.48	0	0.65	1.07	0.32	{XP_010253614.1; PREDICTED: probable E3 ubiquitin-protein ligase HIP1 [Nelumbo nucifera]}	{sp|Q7XTV7|HIP1_ORYSJ; Probable E3 ubiquitin-protein ligase HIP1 OS=Oryza sativa subsp. japonica GN=HIP1 PE=1 SV=2}	{nnu:104594819; - - - - -}	{At2g37150; KOG0800 FOG: Predicted E3 ubiquitin ligase O Posttranslational modification, protein turnover, chaperones ;}	{GO:0008270; zinc ion binding; molecular_function GO:0046872; metal ion binding; molecular_function GO:0004842; ubiquitin-protein ligase activity; molecular_function GO:0005680; anaphase-promoting complex; cellular_component GO:0005515; protein binding; molecular_function GO:0003723; RNA binding; molecular_function}	{XM_006378699.1; Populus trichocarpa hypothetical protein (POPTR_0010s22750g) mRNA, complete cds}	{PF12906:RING-variant domain PF00097:Zinc finger, C3HC4 type (RING finger) PF17122:Zinc-finger PF12678:RING-H2 zinc finger domain PF00628:PHD-finger PF14634:zinc-RING finger domain PF13639:Ring finger domain PF11789:Zinc-finger of the MIZ type in Nse subunit PF17123:RING-like zinc finger PF12861:Anaphase-promoting complex subunit 11 RING-H2 finger PF03854:P-11 zinc finger}
transcript_HQ_HBZL_transcript10677/f3p0/1991	1991	0	0	0	0	0	0	0	0	0	0	{XP_010278369.1; PREDICTED: probable ADP-ribosylation factor GTPase-activating protein AGD5 [Nelumbo nucifera]}	{sp|Q9FL69|AGD5_ARATH; Probable ADP-ribosylation factor GTPase-activating protein AGD5 OS=Arabidopsis thaliana GN=AGD5 PE=1 SV=1}	{jcu:105632810; K12486 SMAP stromal membrane-associated protein - ko04144; Cellular Processes; Transport and catabolism; Endocytosis}	{At5g54310; KOG0703 Predicted GTPase-activating protein T Signal transduction mechanisms ;}	{GO:0005096; GTPase activator activity; molecular_function}	{XM_004150050.2; PREDICTED: Cucumis sativus probable ADP-ribosylation factor GTPase-activating protein AGD5 (LOC101214277), mRNA}	{PF01412:Putative GTPase activating protein for Arf}
transcript_HQ_HBZL_transcript10678/f2p0/1995	1995	406.94	0	0	0	0	12.06	0	0	0	0	{XP_010267416.1; PREDICTED: heterogeneous nuclear ribonucleoprotein Q isoform X1 [Nelumbo nucifera]}	{sp|O60506|HNRPQ_HUMAN; Heterogeneous nuclear ribonucleoprotein Q OS=Homo sapiens GN=SYNCRIP PE=1 SV=2}	{vra:106760154; K13161 HNRNPR heterogeneous nuclear ribonucleoprotein R - -}	{At4g00830; KOG0117 Heterogeneous nuclear ribonucleoprotein R (RRM superfamily) A RNA processing and modification ;}	{GO:0003676; nucleic acid binding; molecular_function GO:0016020; membrane; cellular_component GO:0003723; RNA binding; molecular_function}	{XM_010269117.2; PREDICTED: Nelumbo nucifera heterogeneous nuclear ribonucleoprotein Q (LOC104604668), transcript variant X4, mRNA}	{PF08777:RNA binding motif PF05481:Mycobacterium 19 kDa lipoprotein antigen PF16367:RNA recognition motif PF00076:RNA recognition motif. (a.k.a. RRM, RBD, or RNP domain)}
transcript_HQ_HBZL_transcript10679/f2p0/2023	2024	1060.5	0	0	0	1	30.92	0	0	0	0.03	{XP_010247617.1; PREDICTED: cysteine-rich receptor-like protein kinase 10 [Nelumbo nucifera]}	{sp|Q8GYA4|CRK10_ARATH; Cysteine-rich receptor-like protein kinase 10 OS=Arabidopsis thaliana GN=CRK10 PE=1 SV=3}	{vvi:100241634; - - - - -}	{NA}	{GO:0007016; cytoskeletal anchoring at plasma membrane; biological_process GO:0006468; protein phosphorylation; biological_process GO:0004672; protein kinase activity; molecular_function GO:0016010; dystrophin-associated glycoprotein complex; cellular_component GO:0005524; ATP binding; molecular_function}	{XM_019199018.1; PREDICTED: Nelumbo nucifera putative cysteine-rich receptor-like protein kinase 35 (LOC109115229), mRNA}	{PF05454:Dystroglycan (Dystrophin-associated glycoprotein 1) PF07714:Protein tyrosine kinase PF00069:Protein kinase domain}
transcript_HQ_HBZL_transcript1067/f2p0/3718	3718	98.25	0	0	0	0	1.47	0	0	0	0	{NA}	{NA}	{NA}	{NA}	{NA}	{AC253855.1; Aquilegia coerulea clone COL02-M18, complete sequence}	{NA}
transcript_HQ_HBZL_transcript10680/f4p0/1997	1997	146	0	0	0	0	4.32	0	0	0	0	{XP_010276911.1; PREDICTED: uncharacterized protein LOC104611526 [Nelumbo nucifera]}	{NA}	{pop:POPTR_0003s13130g; - - - - -}	{At5g41460; KOG2246 Galactosyltransferases G Carbohydrate transport and metabolism ;}	{GO:0016757; transferase activity, transferring glycosyl groups; molecular_function GO:0005886; plasma membrane; cellular_component GO:0004016; adenylate cyclase activity; molecular_function GO:0006171; cAMP biosynthetic process; biological_process GO:0016020; membrane; cellular_component}	{XM_019373323.1; PREDICTED: Nicotiana attenuata uncharacterized LOC109209959 (LOC109209959), mRNA}	{PF02434:Fringe-like PF06327:Domain of Unknown Function (DUF1053)}
transcript_HQ_HBZL_transcript10681/f2p0/2000	2000	120.97	0	2.66	21.98	9.71	3.58	0	0.08	0.73	0.3	{XP_006444908.1; hypothetical protein CICLE_v10020418mg [Citrus clementina]}	{sp|Q9M310|FBK77_ARATH; F-box/kelch-repeat protein At3g61590 OS=Arabidopsis thaliana GN=At3g61590 PE=1 SV=1}	{sot:102592726; - - - - -}	{NA}	{GO:0005515; protein binding; molecular_function}	{XM_015774638.1; PREDICTED: Oryza sativa Japonica Group F-box/kelch-repeat protein At3g61590 (LOC4327169), mRNA}	{PF12937:F-box-like PF00646:F-box domain PF07646:Kelch motif}
transcript_HQ_HBZL_transcript10685/f8p0/1971	1971	1539	0	0	0	0	46.25	0	0	0	0	{XP_010259364.1; PREDICTED: probable mitochondrial-processing peptidase subunit beta, mitochondrial [Nelumbo nucifera]}	{sp|Q42290|MPPB_ARATH; Probable mitochondrial-processing peptidase subunit beta, mitochondrial OS=Arabidopsis thaliana GN=At3g02090 PE=1 SV=2}	{nnu:104598824; K17732 PMPCB, MAS1 mitochondrial-processing peptidase subunit beta 3.4.24.64 -}	{At3g02090; KOG0960 Mitochondrial processing peptidase, beta subunit, and related enzymes (insulinase superfamily) O Posttranslational modification, protein turnover, chaperones ;}	{GO:0006508; proteolysis; biological_process GO:0008290; F-actin capping protein complex; cellular_component GO:0051016; barbed-end actin filament capping; biological_process}	{XM_010259805.2; PREDICTED: Nelumbo nucifera probable mitochondrial-processing peptidase subunit beta, mitochondrial (LOC104597978), mRNA}	{PF08367:Peptidase M16C associated PF01267:F-actin capping protein alpha subunit}
transcript_HQ_HBZL_transcript10688/f3p0/1993	1993	69.11	25.05	28.64	25.15	22.59	2.05	0.7	0.85	0.84	0.69	{XP_010242343.1; PREDICTED: protein NRT1/ PTR FAMILY 4.6 [Nelumbo nucifera]}	{sp|Q8H157|PTR19_ARATH; Protein NRT1/ PTR FAMILY 4.6 OS=Arabidopsis thaliana GN=NPF4.6 PE=1 SV=1}	{nnu:104596713; - - - - -}	{At1g69850; KOG1237 H+/oligopeptide symporter E Amino acid transport and metabolism ;}	{GO:0006810; transport; biological_process GO:0005215; NA GO:0016020; membrane; cellular_component}	{XM_011072731.1; PREDICTED: Sesamum indicum protein NRT1/ PTR FAMILY 4.6-like (LOC105156563), mRNA}	{PF00854:POT family}
transcript_HQ_HBZL_transcript1068/f2p0/3717	3717	754.53	779.89	292.8	63.95	77.35	11.3	11.05	4.38	1.08	1.19	{XP_010264387.1; PREDICTED: E3 ubiquitin-protein ligase BRE1-like 1 isoform X2 [Nelumbo nucifera]}	{sp|Q8RXD6|BRE1A_ARATH; E3 ubiquitin-protein ligase BRE1-like 1 OS=Arabidopsis thaliana GN=HUB1 PE=1 SV=1}	{cit:102612288; K10696 BRE1 E3 ubiquitin-protein ligase BRE1 2.3.2.27 -}	{At2g44950; KOG0978 E3 ubiquitin ligase involved in syntaxin degradation O Posttranslational modification, protein turnover, chaperones ;}	{GO:0006606; protein import into nucleus; biological_process GO:0046872; metal ion binding; molecular_function GO:0008270; zinc ion binding; molecular_function GO:0005515; protein binding; molecular_function}	{NA}	{PF17121:Zinc finger, C3HC4 type (RING finger) PF12678:RING-H2 zinc finger domain PF07926:TPR/MLP1/MLP2-like protein PF00097:Zinc finger, C3HC4 type (RING finger) PF14634:zinc-RING finger domain PF13639:Ring finger domain}
transcript_HQ_HBZL_transcript10690/f9p0/1978	1978	5394.67	33.49	0.94	0	1	161.46	0.95	0.03	0	0.03	{XP_010256748.1; PREDICTED: uncharacterized protein LOC104597057 isoform X2 [Nelumbo nucifera]}	{NA}	{nnu:104597057; - - - - -}	{NA}	{NA}	{NA}	{NA}
transcript_HQ_HBZL_transcript10691/f2p0/1993	1993	1952.57	0	0	0	0	57.94	0	0	0	0	{XP_015883214.1; PREDICTED: enolase 1, chloroplastic [Ziziphus jujuba]}	{sp|Q9C9C4|ENO1_ARATH; Enolase 1, chloroplastic OS=Arabidopsis thaliana GN=ENO1 PE=1 SV=1}	{nnu:104600649; K01689 ENO, eno enolase 4.2.1.11 ko01200; Metabolism; Global and overview maps; Carbon metabolism | ko01230; Metabolism; Global and overview maps; Biosynthesis of amino acids | ko00010; Metabolism; Carbohydrate metabolism; Glycolysis / Gluconeogenesis | ko00680; Metabolism; Energy metabolism; Methane metabolism | ko03018; Genetic Information Processing; Folding, sorting and degrad…	{At1g74030; KOG2670 Enolase G Carbohydrate transport and metabolism ;}	{NA}	{XM_002511965.2; PREDICTED: Ricinus communis enolase 1, chloroplastic (LOC8264565), mRNA}	{NA}
transcript_HQ_HBZL_transcript10692/f2p0/1983	1983	0	23.55	27.19	0	0	0	0.66	0.81	0	0	{XP_004243351.1; PREDICTED: bromodomain-containing protein 4 [Solanum lycopersicum]}	{NA}	{pxb:103948550; - - - - -}	{NA}	{GO:0003779; actin binding; molecular_function GO:0009058; biosynthetic process; biological_process GO:0004674; protein serine/threonine kinase activity; molecular_function GO:0016740; transferase activity; molecular_function}	{XM_002272808.4; PREDICTED: Vitis vinifera actin cytoskeleton-regulatory complex protein PAN1 (LOC100264321), mRNA}	{PF08587:Ubiquitin associated domain (UBA) PF01608:I/LWEQ domain PF00494:Squalene/phytoene synthase}
transcript_HQ_HBZL_transcript10693/f8p0/1988	1988	2412.16	0	0	0	0	71.78	0	0	0	0	{XP_010272431.1; PREDICTED: eukaryotic translation initiation factor 3 subunit D-like [Nelumbo nucifera]}	{sp|P56820|EIF3D_ARATH; Eukaryotic translation initiation factor 3 subunit D OS=Arabidopsis thaliana GN=TIF3D1 PE=1 SV=1}	{nnu:104599405; K03251 EIF3D translation initiation factor 3 subunit D - ko03013; Genetic Information Processing; Translation; RNA transport}	{At4g20980; KOG2479 Translation initiation factor 3, subunit d (eIF-3d) J Translation, ribosomal structure and biogenesis ;}	{GO:0005737; cytoplasm; cellular_component GO:0005852; eukaryotic translation initiation factor 3 complex; cellular_component GO:0003743; translation initiation factor activity; molecular_function GO:0008023; transcription elongation factor complex; cellular_component}	{XM_006377309.1; Populus trichocarpa Eukaryotic translation initiation factor 3 subunit 7 family protein (POPTR_0011s05330g) mRNA, complete cds}	{PF05091:Eukaryotic translation initiation factor 3 subunit 7 (eIF-3) PF10505:NMDA receptor-regulated gene protein 2 C-terminus}
transcript_HQ_HBZL_transcript10695/f3p0/1991	1991	353	0	0	0	0	10.49	0	0	0	0	{XP_018808629.1; PREDICTED: synaptotagmin-5-like [Juglans regia]}	{sp|A0JJX5|SYT4_ARATH; Synaptotagmin-4 OS=Arabidopsis thaliana GN=SYT4 PE=2 SV=1}	{lang:109358804; - - - - -; lang:109358804; - - - - -}	{At3g61050; KOG1012 Ca2+-dependent lipid-binding protein CLB1/vesicle protein vp115/Granuphilin A, contains C2 domain R General function prediction only ;}	{GO:0008289; lipid binding; molecular_function GO:0009405; pathogenesis; biological_process GO:0005515; protein binding; molecular_function}	{XM_010663291.2; PREDICTED: Vitis vinifera synaptotagmin-5 (LOC100265985), transcript variant X5, mRNA}	{PF04888:Secretion system effector C (SseC) like family PF17047:Synaptotagmin-like mitochondrial-lipid-binding domain PF00168:C2 domain}
transcript_HQ_HBZL_transcript10696/f2p0/1984	1986	180.96	0	0	0	0	5.39	0	0	0	0	{XP_010267507.1; PREDICTED: plant UBX domain-containing protein 10-like [Nelumbo nucifera]}	{sp|Q9M0N1|PUX10_ARATH; Plant UBX domain-containing protein 10 OS=Arabidopsis thaliana GN=PUX10 PE=2 SV=1}	{pop:POPTR_0003s14510g; K18726 FAF2, UBXD8 FAS-associated factor 2 - -}	{At4g10790; KOG1363 Predicted regulator of the ubiquitin pathway (contains UAS and UBX domains) T Signal transduction mechanisms ;}	{GO:0006270; DNA-dependent DNA replication initiation; biological_process GO:0005515; protein binding; molecular_function GO:0006352; transcription initiation, DNA-dependent; biological_process GO:0005669; transcription factor TFIID complex; cellular_component}	{XM_010269205.2; PREDICTED: Nelumbo nucifera plant UBX domain-containing protein 10-like (LOC104604720), mRNA}	{PF05236:Transcription initiation factor TFIID component TAF4 family PF02724:CDC45-like protein PF00789:UBX domain}
transcript_HQ_HBZL_transcript10697/f2p0/1983	1983	163.24	6	5	0	0	4.87	0.17	0.15	0	0	{XP_010253791.1; PREDICTED: probable protein phosphatase 2C 25 [Nelumbo nucifera]}	{sp|Q9XEE8|P2C30_ARATH; Probable protein phosphatase 2C 30 OS=Arabidopsis thaliana GN=PP2C5 PE=2 SV=1}	{nnu:104594934; - - - - -}	{At2g40180; KOG0698 Serine/threonine protein phosphatase T Signal transduction mechanisms ;}	{GO:0003824; NA}	{LT594796.1; Theobroma cacao genome assembly, chromosome: IX}	{PF07228:Stage II sporulation protein E (SpoIIE) PF00481:Protein phosphatase 2C}
transcript_HQ_HBZL_transcript10699/f3p0/2002	2002	903.49	0	45	99	84	26.67	0	1.33	3.29	2.56	{XP_017645502.1; PREDICTED: protein NRT1/ PTR FAMILY 5.1-like [Gossypium arboreum]}	{sp|Q8VZR7|PTR30_ARATH; Protein NRT1/ PTR FAMILY 5.1 OS=Arabidopsis thaliana GN=NPF5.1 PE=2 SV=2}	{nnu:104597206; - - - - -}	{At2g40460; KOG1237 H+/oligopeptide symporter E Amino acid transport and metabolism ;}	{GO:0006810; transport; biological_process GO:0016020; membrane; cellular_component GO:0005215; NA}	{XM_012235800.1; PREDICTED: Jatropha curcas protein NRT1/ PTR FAMILY 5.1 (LOC105649211), mRNA}	{PF00854:POT family}
transcript_HQ_HBZL_transcript10702/f3p0/2044	2049	663.51	15.23	50.26	42.6	47.47	19.08	0.41	1.44	1.38	1.41	{XP_010260158.1; PREDICTED: ethylene-responsive transcription factor RAP2-7-like isoform X2 [Nelumbo nucifera]}	{sp|Q9SK03|RAP27_ARATH; Ethylene-responsive transcription factor RAP2-7 OS=Arabidopsis thaliana GN=RAP2-7 PE=2 SV=2}	{nnu:104594736; K09284 AP2 AP2-like factor, euAP2 lineage - -}	{NA}	{GO:0003700; sequence-specific DNA binding transcription factor activity; molecular_function GO:0006355; regulation of transcription, DNA-dependent; biological_process}	{XM_008226760.2; PREDICTED: Prunus mume ethylene-responsive transcription factor RAP2-7 (LOC103324655), transcript variant X2, mRNA}	{PF00847:AP2 domain}
transcript_HQ_HBZL_transcript10703/f4p0/1978	1978	562.57	0	0	0	0	16.84	0	0	0	0	{XP_010278149.1; PREDICTED: magnesium transporter MRS2-I-like [Nelumbo nucifera]}	{sp|Q9FLG2|MRS22_ARATH; Magnesium transporter MRS2-2 OS=Arabidopsis thaliana GN=MRS2-2 PE=2 SV=1}	{egu:105042175; K16075 MRS2, MFM1 magnesium transporter - -}	{At5g64560; KOG2662 Magnesium transporters: CorA family P Inorganic ion transport and metabolism ;}	{GO:0005198; NA GO:0030001; metal ion transport; biological_process GO:0016020; membrane; cellular_component GO:0019031; viral envelope; cellular_component GO:0055085; transmembrane transport; biological_process GO:0008289; lipid binding; molecular_function GO:0046873; metal ion transmembrane transporter activity; molecular_function GO:0005576; NA GO:0006869; lipid transport; biological_process G…	{XM_017785874.1; PREDICTED: Gossypium arboreum magnesium transporter MRS2-I-like (LOC108482757), transcript variant X1, mRNA}	{PF01442:Apolipoprotein A1/A4/E domain PF01544:CorA-like Mg2+ transporter protein PF04513:Baculovirus polyhedron envelope protein, PEP, C terminus PF00038:Intermediate filament protein}
transcript_HQ_HBZL_transcript10704/f7p0/2017	2015	1148.52	0	0	0	0	33.66	0	0	0	0	{XP_019052485.1; PREDICTED: probable magnesium transporter NIPA8 isoform X3 [Nelumbo nucifera]}	{sp|Q8RWF4|NIPA8_ARATH; Probable magnesium transporter NIPA8 OS=Arabidopsis thaliana GN=At3g26670 PE=2 SV=1}	{nnu:104591909; - - - - -}	{At3g26670; KOG2922 Uncharacterized conserved protein S Function unknown ;}	{GO:0015693; magnesium ion transport; biological_process GO:0015095; magnesium ion transmembrane transporter activity; molecular_function GO:0016021; integral to membrane; cellular_component}	{XM_019196940.1; PREDICTED: Nelumbo nucifera probable magnesium transporter NIPA8 (LOC104592696), transcript variant X3, mRNA}	{PF05653:Magnesium transporter NIPA}
transcript_HQ_HBZL_transcript10709/f27p0/1965	1965	2576	0	0	0	0	77.68	0	0	0	0	{XP_010274988.1; PREDICTED: uncharacterized protein slp1-like [Nelumbo nucifera]}	{sp|O59729|SLPI_SCHPO; Uncharacterized protein slp1 OS=Schizosaccharomyces pombe (strain 972 / ATCC 24843) GN=SPBC3E7.09 PE=3 SV=1}	{cic:CICLE_v10019431mg; - - - - -}	{At1g71360; KOG1396 Uncharacterized conserved protein S Function unknown ;}	{NA}	{XM_010276688.2; PREDICTED: Nelumbo nucifera uncharacterized protein slp1-like (LOC104610179), transcript variant X2, mRNA}	{NA}
transcript_HQ_HBZL_transcript1070/f2p0/3717	3717	944.78	357.06	89.12	0	0	14.15	5.06	1.33	0	0	{XP_010273593.1; PREDICTED: valine--tRNA ligase, mitochondrial 1 [Nelumbo nucifera]}	{sp|P93736|SYVM1_ARATH; Valine--tRNA ligase, mitochondrial 1 OS=Arabidopsis thaliana GN=TWN2 PE=2 SV=2}	{egu:105037449; K01873 VARS, valS valyl-tRNA synthetase 6.1.1.9 ko00970; Genetic Information Processing; Translation; Aminoacyl-tRNA biosynthesis}	{At1g14610; KOG0432 Valyl-tRNA synthetase J Translation, ribosomal structure and biogenesis ;}	{GO:0006418; tRNA aminoacylation for protein translation; biological_process GO:0002161; aminoacyl-tRNA editing activity; molecular_function GO:0004832; valine-tRNA ligase activity; molecular_function GO:0006438; valyl-tRNA aminoacylation; biological_process GO:0005737; cytoplasm; cellular_component GO:0004812; aminoacyl-tRNA ligase activity; molecular_function GO:0000166; nucleotide binding; mol…	{XM_010275291.2; PREDICTED: Nelumbo nucifera valine--tRNA ligase, mitochondrial 1 (LOC104609078), mRNA}	{PF09334:tRNA synthetases class I (M) PF08264:Anticodon-binding domain of tRNA PF13603:Leucyl-tRNA synthetase, Domain 2 PF00133:tRNA synthetases class I (I, L, M and V) PF10458:Valyl tRNA synthetase tRNA binding arm}
transcript_HQ_HBZL_transcript10716/f2p0/1978	1977	162.99	0	1	0	2.93	4.88	0	0.03	0	0.09	{XP_010255200.1; PREDICTED: scarecrow-like protein 15 [Nelumbo nucifera]}	{sp|O23210|SCL15_ARATH; Scarecrow-like protein 15 OS=Arabidopsis thaliana GN=SCL15 PE=2 SV=3}	{nnu:104595949; - - - - -}	{NA}	{NA}	{NA}	{NA}
transcript_HQ_HBZL_transcript10718/f2p0/1981	1981	170.13	0	0	0	0	5.08	0	0	0	0	{XP_010265087.1; PREDICTED: mannose-6-phosphate isomerase 2-like [Nelumbo nucifera]}	{sp|Q9M884|MPI1_ARATH; Mannose-6-phosphate isomerase 1 OS=Arabidopsis thaliana GN=PMI1 PE=1 SV=1}	{pop:POPTR_0004s09820g; K01809 manA, MPI mannose-6-phosphate isomerase 5.3.1.8 ko00051; Metabolism; Carbohydrate metabolism; Fructose and mannose metabolism | ko00520; Metabolism; Carbohydrate metabolism; Amino sugar and nucleotide sugar metabolism}	{At3g02570; KOG2757 Mannose-6-phosphate isomerase G Carbohydrate transport and metabolism ;}	{GO:0008270; zinc ion binding; molecular_function GO:0004476; mannose-6-phosphate isomerase activity; molecular_function GO:0005975; carbohydrate metabolic process; biological_process}	{XM_002283890.3; PREDICTED: Vitis vinifera mannose-6-phosphate isomerase 1 (LOC100263511), mRNA}	{PF01238:Phosphomannose isomerase type I}
transcript_HQ_HBZL_transcript10719/f3p0/1996	1996	412	0	0	0	0	12.2	0	0	0	0	{XP_018846814.1; PREDICTED: ammonium transporter 1 member 1-like [Juglans regia]}	{sp|O04161|AMT12_SOLLC; Ammonium transporter 1 member 2 OS=Solanum lycopersicum GN=AMT1-2 PE=2 SV=1}	{pmum:103323778; K03320 amt, AMT, MEP ammonium transporter, Amt family - -}	{At4g13510; KOG0682 Ammonia permease P Inorganic ion transport and metabolism ;}	{GO:0008519; ammonium transmembrane transporter activity; molecular_function GO:0016020; membrane; cellular_component GO:0015696; ammonium transport; biological_process}	{XM_004493825.1; PREDICTED: Cicer arietinum ammonium transporter 1 member 4-like (LOC101492628), mRNA}	{PF00909:Ammonium Transporter Family}
transcript_HQ_HBZL_transcript1071/f3p0/3709	3709	1031.19	1.36	1	0	0	15.48	0.02	0.01	0	0	{KJB38899.1; hypothetical protein B456_007G3563001 [Gossypium raimondii]}	{sp|O81825|DRL28_ARATH; Probable disease resistance protein At4g27220 OS=Arabidopsis thaliana GN=At4g27220 PE=2 SV=1}	{egu:105052742; K13459 RPS2 disease resistance protein RPS2 - ko04626; Organismal Systems; Environmental adaptation; Plant-pathogen interaction}	{At4g27220; KOG4658 Apoptotic ATPase T Signal transduction mechanisms ;}	{GO:0005515; protein binding; molecular_function GO:0005524; ATP binding; molecular_function GO:0043531; ADP binding; molecular_function GO:0016887; ATPase activity; molecular_function}	{NA}	{PF07728:AAA domain (dynein-related subfamily) PF00931:NB-ARC domain PF13855:Leucine rich repeat}
transcript_HQ_HBZL_transcript10720/f2p0/1997	1997	437	0	0	1.83	0	12.94	0	0	0.06	0	{XP_010272954.1; PREDICTED: pyridoxine/pyridoxamine 5'-phosphate oxidase 1, chloroplastic isoform X1 [Nelumbo nucifera]}	{sp|Q9LTX3|PPOX1_ARATH; Pyridoxine/pyridoxamine 5'-phosphate oxidase 1, chloroplastic OS=Arabidopsis thaliana GN=PPOX1 PE=1 SV=1}	{pmum:103319600; K00275 pdxH, PNPO pyridoxamine 5'-phosphate oxidase 1.4.3.5 ko00750; Metabolism; Metabolism of cofactors and vitamins; Vitamin B6 metabolism}	{At5g49970_1; KOG2585 Uncharacterized conserved protein S Function unknown ;}	{GO:0004733; pyridoxamine-phosphate oxidase activity; molecular_function GO:0055114; oxidation-reduction process; biological_process GO:0016638; oxidoreductase activity, acting on the CH-NH2 group of donors; molecular_function GO:0010181; FMN binding; molecular_function}	{XM_019578453.1; PREDICTED: Lupinus angustifolius pyridoxine/pyridoxamine 5'-phosphate oxidase 1, chloroplastic-like (LOC109340727), transcript variant X1, mRNA}	{PF10590:Pyridoxine 5'-phosphate oxidase C-terminal dimerisation region PF01243:Pyridoxamine 5'-phosphate oxidase PF12766:Pyridoxamine 5'-phosphate oxidase}
transcript_HQ_HBZL_transcript10721/f3p0/1994	1994	647	0	1.94	0	0	19.19	0	0.06	0	0	{XP_006481027.1; PREDICTED: vacuolar cation/proton exchanger 3 [Citrus sinensis]}	{sp|Q93Z81|CAX3_ARATH; Vacuolar cation/proton exchanger 3 OS=Arabidopsis thaliana GN=CAX3 PE=1 SV=1}	{rcu:8267509; K07300 chaA, CAX Ca2+:H+ antiporter - -}	{At3g51860; KOG1397 Ca2+/H+ antiporter VCX1 and related proteins P Inorganic ion transport and metabolism ;}	{GO:0055085; transmembrane transport; biological_process GO:0016021; integral to membrane; cellular_component}	{XM_010652602.2; PREDICTED: Vitis vinifera vacuolar cation/proton exchanger 3 (LOC100243275), mRNA}	{PF01699:Sodium/calcium exchanger protein}
transcript_HQ_HBZL_transcript10723/f2p0/1993	1993	74.57	0	0	0	0	2.21	0	0	0	0	{XP_010243240.1; PREDICTED: probable glucuronoxylan glucuronosyltransferase IRX7 [Nelumbo nucifera]}	{sp|Q9ZUV3|IRX7_ARATH; Probable glucuronoxylan glucuronosyltransferase IRX7 OS=Arabidopsis thaliana GN=IRX7 PE=2 SV=1}	{pvu:PHAVU_011G085300g; K20889 IRX7, FRA8, F8H probable glucuronoxylan glucuronosyltransferase IRX7 [EC2.4.1.-] - -}	{At2g28110; KOG1021 Acetylglucosaminyltransferase EXT1/exostosin 1 GMW Carbohydrate transport and metabolism ; Cell wall/membrane/envelope biogenesis ; Extracellular structures ;}	{NA}	{XM_013609382.1; Medicago truncatula glucuronoxylan glucuronosyltransferase, putative mRNA}	{NA}
transcript_HQ_HBZL_transcript10725/f4p0/1985	1985	664.08	0	0	0	0	19.8	0	0	0	0	{XP_010252027.1; PREDICTED: serine/threonine-protein kinase AtPK2/AtPK19-like [Nelumbo nucifera]}	{sp|Q39030|KPK2_ARATH; Serine/threonine-protein kinase AtPK2/AtPK19 OS=Arabidopsis thaliana GN=ATPK2 PE=1 SV=2}	{nnu:104593748; K04688 RPS6KB ribosomal protein S6 kinase beta 2.7.11.1 ko04012; Environmental Information Processing; Signal transduction; ErbB signaling pathway | ko04350; Environmental Information Processing; Signal transduction; TGF-beta signaling pathway | ko04371; Environmental Information Processing; Signal transduction; Apelin signaling pathway | ko04066; Environmental Information Process…	{At3g08720; KOG0598 Ribosomal protein S6 kinase and related proteins RT General function prediction only ; Signal transduction mechanisms ;}	{GO:0006468; protein phosphorylation; biological_process GO:0005524; ATP binding; molecular_function GO:0004674; protein serine/threonine kinase activity; molecular_function GO:0016773; phosphotransferase activity, alcohol group as acceptor; molecular_function GO:0016706; oxidoreductase activity, acting on paired donors, with incorporation or reduction of molecular oxygen, 2-oxoglutarate as one d…	{XM_010253725.1; PREDICTED: Nelumbo nucifera serine/threonine-protein kinase AtPK2/AtPK19-like (LOC104593748), mRNA}	{PF00433:Protein kinase C terminal domain PF06293:Lipopolysaccharide kinase (Kdo/WaaP) family PF10637:Oxoglutarate and iron-dependent oxygenase degradation C-term PF07714:Protein tyrosine kinase PF00069:Protein kinase domain}
transcript_HQ_HBZL_transcript10727/f2p0/1981	1981	496.27	6	12.15	0	0	14.83	0.17	0.36	0	0	{XP_010270333.1; PREDICTED: O-acyltransferase WSD1-like isoform X1 [Nelumbo nucifera]}	{sp|Q93ZR6|WSD1_ARATH; O-acyltransferase WSD1 OS=Arabidopsis thaliana GN=WSD1 PE=2 SV=1}	{nnu:104606698; - - - - -}	{NA}	{GO:0045017; glycerolipid biosynthetic process; biological_process GO:0004144; diacylglycerol O-acyltransferase activity; molecular_function}	{NA}	{PF03007:Wax ester synthase-like Acyl-CoA acyltransferase domain}
transcript_HQ_HBZL_transcript10729/f3p0/1981	1981	295.4	0	37.24	73.56	115.79	8.83	0	1.11	2.48	3.57	{XP_010252642.1; PREDICTED: U4/U6.U5 tri-snRNP-associated protein 2 [Nelumbo nucifera]}	{sp|Q3TIX9|SNUT2_MOUSE; U4/U6.U5 tri-snRNP-associated protein 2 OS=Mus musculus GN=Usp39 PE=1 SV=2}	{nnu:104594165; K12847 USP39, SAD1 U4/U6.U5 tri-snRNP-associated protein 2 - ko03040; Genetic Information Processing; Transcription; Spliceosome}	{At4g22290_2; KOG2026 Spindle pole body protein - Sad1p Z Cytoskeleton ;}	{GO:0036459; NA GO:0003887; DNA-directed DNA polymerase activity; molecular_function GO:0006351; transcription, DNA-dependent; biological_process GO:0003677; DNA binding; molecular_function GO:0008270; zinc ion binding; molecular_function GO:0016579; protein deubiquitination; biological_process}	{XM_008239855.2; PREDICTED: Prunus mume U4/U6.U5 tri-snRNP-associated protein 2-like (LOC103336756), transcript variant X4, mRNA}	{PF00443:Ubiquitin carboxyl-terminal hydrolase PF02148:Zn-finger in ubiquitin-hydrolases and other protein PF04931:DNA polymerase phi}
transcript_HQ_HBZL_transcript1072/f2p0/3791	3792	1374.97	105.22	89.78	116.94	95.62	20.15	1.46	1.31	1.93	1.45	{XP_010262249.1; PREDICTED: MATH domain-containing protein At5g43560-like [Nelumbo nucifera]}	{sp|Q8RY18|Y5436_ARATH; MATH domain-containing protein At5g43560 OS=Arabidopsis thaliana GN=At5g43560 PE=1 SV=1}	{fve:101303744; - - - - -}	{NA}	{GO:0003677; DNA binding; molecular_function GO:0005515; protein binding; molecular_function GO:0006355; regulation of transcription, DNA-dependent; biological_process GO:0016020; membrane; cellular_component}	{XM_010276555.1; PREDICTED: Nelumbo nucifera MATH domain-containing protein At5g43560-like (LOC104610076), transcript variant X2, mRNA}	{PF01698:Floricaula / Leafy protein PF00839:Cysteine rich repeat PF00917:MATH domain}
transcript_HQ_HBZL_transcript10731/f4p0/2000	2000	46	1	0	0	0	1.36	0.03	0	0	0	{NA}	{NA}	{NA}	{NA}	{NA}	{NA}	{NA}
transcript_HQ_HBZL_transcript10735/f7p0/1990	1990	1173.88	63.3	0	0	0	34.89	1.78	0	0	0	{XP_010253608.1; PREDICTED: serine carboxypeptidase-like 27 [Nelumbo nucifera]}	{sp|Q9SFB5|SCP27_ARATH; Serine carboxypeptidase-like 27 OS=Arabidopsis thaliana GN=SCPL27 PE=2 SV=1}	{nnu:104594814; K16297 SCPL-II serine carboxypeptidase-like clade II 3.4.16.- -}	{At3g07990; KOG1282 Serine carboxypeptidases (lysosomal cathepsin A) OE Posttranslational modification, protein turnover, chaperones ; Amino acid transport and metabolism ;}	{GO:0006508; proteolysis; biological_process GO:0004185; serine-type carboxypeptidase activity; molecular_function}	{XM_002274687.4; PREDICTED: Vitis vinifera serine carboxypeptidase-like 27 (LOC100251399), mRNA}	{PF00450:Serine carboxypeptidase}
transcript_HQ_HBZL_transcript10737/f15p0/1983	1983	622	0	0	0	0	18.56	0	0	0	0	{XP_010265156.1; PREDICTED: ethylene-responsive transcription factor ERF118 [Nelumbo nucifera]}	{sp|Q9CA27|EF118_ARATH; Ethylene-responsive transcription factor ERF118 OS=Arabidopsis thaliana GN=ERF118 PE=2 SV=1}	{nnu:104601805; - - - - -}	{NA}	{GO:0006355; regulation of transcription, DNA-dependent; biological_process GO:0003700; sequence-specific DNA binding transcription factor activity; molecular_function}	{NA}	{PF00847:AP2 domain}
transcript_HQ_HBZL_transcript10739/f11p0/2001	2001	148.3	0	0	0	0	4.38	0	0	0	0	{XP_010241858.1; PREDICTED: probable receptor-like protein kinase At5g47070 [Nelumbo nucifera]}	{sp|Q9LFP7|PIX7_ARATH; Probable serine/threonine-protein kinase PIX7 OS=Arabidopsis thaliana GN=PIX7 PE=1 SV=1}	{nnu:104595070; - - - - -}	{At3g09830; KOG1187 Serine/threonine protein kinase T Signal transduction mechanisms ;}	{GO:0004672; protein kinase activity; molecular_function GO:0006468; protein phosphorylation; biological_process GO:0005524; ATP binding; molecular_function}	{XM_010243556.2; PREDICTED: Nelumbo nucifera probable receptor-like protein kinase At5g47070 (LOC104586354), mRNA}	{PF00069:Protein kinase domain PF07714:Protein tyrosine kinase}
transcript_HQ_HBZL_transcript1073/f3p0/3712	3712	8049.9	0	0	0	0	120.71	0	0	0	0	{XP_018812523.1; PREDICTED: probable alpha,alpha-trehalose-phosphate synthase [UDP-forming] 7 [Juglans regia]}	{sp|Q9LMI0|TPS7_ARATH; Probable alpha,alpha-trehalose-phosphate synthase [UDP-forming] 7 OS=Arabidopsis thaliana GN=TPS7 PE=1 SV=1}	{vvi:100265140; K16055 TPS trehalose 6-phosphate synthase/phosphatase [EC:2.4.1.15 3.1.3.12] 2.4.1.15,3.1.3.12 ko00500; Metabolism; Carbohydrate metabolism; Starch and sucrose metabolism}	{At1g06410; KOG1050 Trehalose-6-phosphate synthase component TPS1 and related subunits G Carbohydrate transport and metabolism ;}	{GO:0003824; NA GO:0005992; trehalose biosynthetic process; biological_process}	{XM_010243849.2; PREDICTED: Nelumbo nucifera probable alpha,alpha-trehalose-phosphate synthase [UDP-forming] 7 (LOC104586565), mRNA}	{PF00982:Glycosyltransferase family 20 PF02358:Trehalose-phosphatase}
transcript_HQ_HBZL_transcript10740/f4p0/1995	1995	1084	0	0	6.24	10.63	32.13	0	0	0.21	0.33	{XP_010277273.1; PREDICTED: aspartate--tRNA ligase 2, cytoplasmic-like [Nelumbo nucifera]}	{sp|Q9M084|SYDC2_ARATH; Aspartate--tRNA ligase 2, cytoplasmic OS=Arabidopsis thaliana GN=IBI1 PE=1 SV=1}	{sot:102590401; K01876 DARS, aspS aspartyl-tRNA synthetase 6.1.1.12 ko00970; Genetic Information Processing; Translation; Aminoacyl-tRNA biosynthesis}	{At4g31180; KOG0556 Aspartyl-tRNA synthetase J Translation, ribosomal structure and biogenesis ;}	{GO:0006418; tRNA aminoacylation for protein translation; biological_process GO:0043039; tRNA aminoacylation; biological_process GO:0019028; viral capsid; cellular_component GO:0005198; NA GO:0000049; tRNA binding; molecular_function GO:0003676; nucleic acid binding; molecular_function GO:0005524; ATP binding; molecular_function GO:0000166; nucleotide binding; molecular_function GO:0005737; cytop…	{XM_016018708.1; PREDICTED: Ziziphus jujuba aspartate--tRNA ligase 2, cytoplasmic (LOC107411167), mRNA}	{PF00152:tRNA synthetases class II (D, K and N) PF01336:OB-fold nucleic acid binding domain PF01409:tRNA synthetases class II core domain (F) PF00901:Orbivirus outer capsid protein VP5}
transcript_HQ_HBZL_transcript10743/f10p0/1971	1971	1884.75	0	0	0	0	56.64	0	0	0	0	{XP_010255087.1; PREDICTED: thylakoidal processing peptidase 1, chloroplastic-like [Nelumbo nucifera]}	{sp|Q9M9Z2|TPP2_ARATH; Probable thylakoidal processing peptidase 2, chloroplastic OS=Arabidopsis thaliana GN=TPP2 PE=2 SV=1}	{nnu:104595855; K03100 lepB, TPP signal peptidase I 3.4.21.89 ko03060; Genetic Information Processing; Folding, sorting and degradation; Protein export | ko02024; Cellular Processes; Cellular community - prokaryotes; Quorum sensing}	{At1g06870; KOG0171 Mitochondrial inner membrane protease, subunit IMP1 O Posttranslational modification, protein turnover, chaperones ;}	{NA}	{XM_018966876.1; PREDICTED: Juglans regia thylakoidal processing peptidase 1, chloroplastic-like (LOC108992344), mRNA}	{NA}
transcript_HQ_HBZL_transcript10745/f2p0/1993	1993	881	175.9	57.22	0	0	26.14	4.94	1.7	0	0	{XP_010252904.1; PREDICTED: uncharacterized WD repeat-containing protein C2A9.03-like [Nelumbo nucifera]}	{sp|Q9Y7K5|YGI3_SCHPO; Uncharacterized WD repeat-containing protein C2A9.03 OS=Schizosaccharomyces pombe (strain 972 / ATCC 24843) GN=SPBC2A9.03 PE=4 SV=2}	{nnu:104594346; - - - - -}	{NA}	{GO:0016844; strictosidine synthase activity; molecular_function GO:0009058; biosynthetic process; biological_process GO:0005515; protein binding; molecular_function}	{XM_010254604.2; PREDICTED: Nelumbo nucifera uncharacterized WD repeat-containing protein C2A9.03-like (LOC104594346), transcript variant X3, mRNA}	{PF00400:WD domain, G-beta repeat PF03088:Strictosidine synthase}
transcript_HQ_HBZL_transcript10747/f3p0/1982	1982	815	24.67	7.14	2.01	0	24.34	0.7	0.21	0.07	0	{XP_010277229.1; PREDICTED: cryptochrome DASH, chloroplastic/mitochondrial [Nelumbo nucifera]}	{sp|Q38JU2|CRYD_SOLLC; Cryptochrome DASH, chloroplastic/mitochondrial OS=Solanum lycopersicum GN=CRYD PE=2 SV=2}	{atr:18440702; K01669 phrB deoxyribodipyrimidine photo-lyase 4.1.99.3 -}	{At5g24850; KOG0133 Deoxyribodipyrimidine photolyase/cryptochrome LT Replication, recombination and repair ; Signal transduction mechanisms ;}	{NA}	{XM_010278927.2; PREDICTED: Nelumbo nucifera cryptochrome DASH, chloroplastic/mitochondrial (LOC104611730), mRNA}	{NA}
transcript_HQ_HBZL_transcript1074/f4p0/3741	3741	1228.88	0	0	0	0	18.27	0	0	0	0	{XP_015897595.1; PREDICTED: probable leucine-rich repeat receptor-like protein kinase At5g49770 [Ziziphus jujuba]}	{sp|Q9LT96|Y5977_ARATH; Probable leucine-rich repeat receptor-like protein kinase At5g49770 OS=Arabidopsis thaliana GN=At5g49770 PE=2 SV=1}	{adu:107476669; - - - - -}	{NA}	{GO:0005524; ATP binding; molecular_function GO:0004672; protein kinase activity; molecular_function GO:0006468; protein phosphorylation; biological_process GO:0005515; protein binding; molecular_function}	{XM_010277677.1; PREDICTED: Nelumbo nucifera probable leucine-rich repeat receptor-like protein kinase At5g49770 (LOC104610856), mRNA}	{PF00069:Protein kinase domain PF13855:Leucine rich repeat PF07714:Protein tyrosine kinase}
transcript_HQ_HBZL_transcript10750/f2p0/2010	2002	30.12	0	0	0	0	0.89	0	0	0	0	{XP_002300894.1; hypothetical protein POPTR_0002s06300g [Populus trichocarpa]}	{NA}	{pop:POPTR_0002s06300g; - - - - -}	{NA}	{NA}	{NA}	{NA}
transcript_HQ_HBZL_transcript10752/f2p0/1989	1989	149.52	0	16	27.79	28.51	4.45	0	0.48	0.93	0.88	{XP_010274674.1; PREDICTED: serine carboxypeptidase-like 50 [Nelumbo nucifera]}	{sp|Q9M9Q6|SCP50_ARATH; Serine carboxypeptidase-like 50 OS=Arabidopsis thaliana GN=SCPL50 PE=2 SV=1}	{vvi:100257846; K09645 CPVL vitellogenic carboxypeptidase-like protein 3.4.16.- -}	{At1g15000; KOG1282 Serine carboxypeptidases (lysosomal cathepsin A) OE Posttranslational modification, protein turnover, chaperones ; Amino acid transport and metabolism ;}	{GO:0004185; serine-type carboxypeptidase activity; molecular_function GO:0006508; proteolysis; biological_process}	{XM_014772750.1; PREDICTED: Glycine max serine carboxypeptidase-like 50 (LOC100780822), mRNA}	{PF00450:Serine carboxypeptidase}
transcript_HQ_HBZL_transcript10753/f3p0/2021	2021	484.52	2	7.02	12	4	14.15	0.06	0.2	0.39	0.12	{XP_009593137.1; PREDICTED: probable serine/threonine-protein kinase Cx32, chloroplastic isoform X1 [Nicotiana tomentosiformis]}	{sp|Q9SII6|PIX13_ARATH; Probable serine/threonine-protein kinase PIX13 OS=Arabidopsis thaliana GN=PIX13 PE=1 SV=2}	{cic:CICLE_v10028539mg; - - - - -}	{At2g17220; KOG1187 Serine/threonine protein kinase T Signal transduction mechanisms ;}	{GO:0004672; protein kinase activity; molecular_function GO:0006468; protein phosphorylation; biological_process GO:0005524; ATP binding; molecular_function}	{XM_002279764.4; PREDICTED: Vitis vinifera probable serine/threonine-protein kinase Cx32, chloroplastic (LOC100255530), mRNA}	{PF07714:Protein tyrosine kinase PF00069:Protein kinase domain}
transcript_HQ_HBZL_transcript10755/f2p0/1979	1979	164	0	1	8.79	16.83	4.91	0	0.03	0.3	0.52	{EOY31045.1; Major facilitator superfamily protein isoform 2 [Theobroma cacao]}	{sp|Q9SZY4|PTR27_ARATH; Protein NRT1/ PTR FAMILY 6.2 OS=Arabidopsis thaliana GN=NPF6.2 PE=1 SV=1}	{gra:105778524; - - - - -}	{At2g26690; KOG1237 H+/oligopeptide symporter E Amino acid transport and metabolism ;}	{GO:0005215; NA GO:0016020; membrane; cellular_component GO:0006810; transport; biological_process}	{XM_011459870.1; PREDICTED: Fragaria vesca subsp. vesca protein NRT1/ PTR FAMILY 6.2 (LOC101298748), mRNA}	{PF00854:POT family}
transcript_HQ_HBZL_transcript10756/f2p0/1988	1988	289	53	288	291	384	8.6	1.49	8.56	9.76	11.8	{XP_002283592.2; PREDICTED: protochlorophyllide-dependent translocon component 52, chloroplastic [Vitis vinifera]}	{sp|Q8W496|PTC52_ARATH; Protochlorophyllide-dependent translocon component 52, chloroplastic OS=Arabidopsis thaliana GN=PTC52 PE=2 SV=1}	{egu:105054717; - - - - -}	{NA}	{GO:0055114; oxidation-reduction process; biological_process GO:0010277; chlorophyllide a oxygenase [overall] activity; molecular_function}	{XM_012716882.1; PREDICTED: Cicer arietinum protochlorophyllide-dependent translocon component 52, chloroplastic (LOC101506112), mRNA}	{PF08417:Pheophorbide a oxygenase}
transcript_HQ_HBZL_transcript10757/f3p0/2030	2030	2982.6	0	0	0	0	86.68	0	0	0	0	{XP_009364298.1; PREDICTED: protein SUPPRESSOR OF K(+) TRANSPORT GROWTH DEFECT 1 [Pyrus x bretschneideri]}	{sp|Q9ZNT0|VPS4_ARATH; Protein SUPPRESSOR OF K(+) TRANSPORT GROWTH DEFECT 1 OS=Arabidopsis thaliana GN=SKD1 PE=1 SV=1}	{pper:PRUPE_ppa005989mg; K12196 VPS4 vacuolar protein-sorting-associated protein 4 - ko04144; Cellular Processes; Transport and catabolism; Endocytosis}	{At2g27600; KOG0739 AAA+-type ATPase O Posttranslational modification, protein turnover, chaperones ;}	{GO:0005524; ATP binding; molecular_function GO:0019079; viral genome replication; biological_process GO:0016887; ATPase activity; molecular_function GO:0009378; four-way junction helicase activity; molecular_function GO:0006355; regulation of transcription, DNA-dependent; biological_process GO:0006281; DNA repair; biological_process GO:0006310; DNA recombination; biological_process GO:0003724; R…	{XM_010246106.1; PREDICTED: Nelumbo nucifera protein SUPPRESSOR OF K(+) TRANSPORT GROWTH DEFECT 1-like (LOC104588250), mRNA}	{PF06068:TIP49 C-terminus PF05496:Holliday junction DNA helicase ruvB N-terminus PF02562:PhoH-like protein PF01057:Parvovirus non-structural protein NS1 PF00004:ATPase family associated with various cellular activities (AAA) PF00158:Sigma-54 interaction domain PF01695:IstB-like ATP binding protein PF07724:AAA domain (Cdc48 subfamily) PF07728:AAA domain (dynein-related subfamily) PF06309:Torsin PF…
transcript_HQ_HBZL_transcript10758/f12p0/1983	1983	508.71	0	0	6	5.99	15.18	0	0	0.2	0.18	{XP_010243196.1; PREDICTED: NAC domain-containing protein 53-like isoform X2 [Nelumbo nucifera]}	{sp|Q949N0|NAC53_ARATH; NAC domain-containing protein 53 OS=Arabidopsis thaliana GN=NAC053 PE=2 SV=1}	{vvi:100242836; - - - - -}	{NA}	{GO:0006355; regulation of transcription, DNA-dependent; biological_process GO:0003677; DNA binding; molecular_function}	{XM_013775391.1; PREDICTED: Brassica oleracea var. oleracea NAC domain-containing protein 53 (LOC106336537), mRNA}	{PF02365:No apical meristem (NAM) protein}
transcript_HQ_HBZL_transcript10759/f2p0/1980	1979	230.07	0	0	0	0	6.88	0	0	0	0	{XP_010254225.1; PREDICTED: auxin-responsive protein IAA1-like [Nelumbo nucifera]}	{sp|Q5VRD1|IAA1_ORYSJ; Auxin-responsive protein IAA1 OS=Oryza sativa subsp. japonica GN=IAA1 PE=2 SV=1}	{nnu:104595262; K14484 IAA auxin-responsive protein IAA - ko04075; Environmental Information Processing; Signal transduction; Plant hormone signal transduction}	{NA}	{NA}	{NM_001279148.2; Solanum lycopersicum protein IAA8 (IAA8), mRNA}	{NA}
transcript_HQ_HBZL_transcript1075/f6p0/3759	3759	74.42	0	0	0	0	1.1	0	0	0	0	{XP_018847682.1; PREDICTED: auxin response factor 6 isoform X3 [Juglans regia]}	{sp|Q6H6V4|ARFF_ORYSJ; Auxin response factor 6 OS=Oryza sativa subsp. japonica GN=ARF6 PE=1 SV=1}	{fve:101306795; - - - - -}	{NA}	{GO:0005634; nucleus; cellular_component GO:0003677; DNA binding; molecular_function GO:0009725; response to hormone stimulus; biological_process GO:0006355; regulation of transcription, DNA-dependent; biological_process}	{XM_010277609.2; PREDICTED: Nelumbo nucifera auxin response factor 6-like (LOC104610814), transcript variant X2, mRNA}	{PF06507:Auxin response factor PF02362:B3 DNA binding domain}
transcript_HQ_HBZL_transcript10760/f9p0/1851	1851	946	0	0	0	0	30.54	0	0	0	0	{XP_010258036.1; PREDICTED: ninja-family protein AFP3 [Nelumbo nucifera]}	{sp|Q9LMX5|AFP2_ARATH; Ninja-family protein AFP2 OS=Arabidopsis thaliana GN=AFP2 PE=1 SV=1}	{nnu:104597935; - - - - -}	{NA}	{NA}	{NA}	{NA}
transcript_HQ_HBZL_transcript10761/f3p0/1982	1982	348	0	0	0	0	10.39	0	0	0	0	{XP_010277925.1; PREDICTED: protein TRANSPORT INHIBITOR RESPONSE 1-like [Nelumbo nucifera]}	{sp|Q570C0|TIR1_ARATH; Protein TRANSPORT INHIBITOR RESPONSE 1 OS=Arabidopsis thaliana GN=TIR1 PE=1 SV=2}	{vvi:100263734; K14485 TIR1 transport inhibitor response 1 - ko04075; Environmental Information Processing; Signal transduction; Plant hormone signal transduction}	{At3g62980; KOG1947 Leucine rich repeat proteins, some proteins contain F-box R General function prediction only ;}	{GO:0016021; integral to membrane; cellular_component GO:0005515; protein binding; molecular_function}	{XM_010089608.1; Morus notabilis hypothetical protein partial mRNA}	{PF00560:Leucine Rich Repeat PF12937:F-box-like PF08165:FerA (NUC095) domain PF13516:Leucine Rich repeat PF13855:Leucine rich repeat}
transcript_HQ_HBZL_transcript10764/f5p0/2001	2002	24.14	0	0	0	5.49	0.71	0	0	0	0.17	{XP_010919352.1; PREDICTED: transmembrane protein 120 homolog [Elaeis guineensis]}	{sp|Q54IK2|TM120_DICDI; Transmembrane protein 120 homolog OS=Dictyostelium discoideum GN=tmem120 PE=3 SV=1}	{egu:105043491; - - - - -}	{At1g33230; KOG4758 Predicted membrane protein R General function prediction only ;}	{GO:0008565; protein transporter activity; molecular_function GO:0006886; intracellular protein transport; biological_process GO:0016020; membrane; cellular_component GO:0016021; integral to membrane; cellular_component GO:0005737; cytoplasm; cellular_component}	{XM_010277907.2; PREDICTED: Nelumbo nucifera transmembrane protein 120 homolog (LOC104611007), mRNA}	{PF07851:TMPIT-like protein PF04871:Uso1 / p115 like vesicle tethering protein, C terminal region}
transcript_HQ_HBZL_transcript10765/f3p0/1956	1956	238.08	0	6	21.01	7	7.22	0	0.18	0.72	0.22	{XP_010254530.1; PREDICTED: uncharacterized protein At1g04910-like [Nelumbo nucifera]}	{sp|Q8W486|Y1491_ARATH; Uncharacterized protein At1g04910 OS=Arabidopsis thaliana GN=At1g04910 PE=2 SV=1}	{nnu:104595490; - - - - -}	{NA}	{NA}	{XM_010279195.2; PREDICTED: Nelumbo nucifera uncharacterized protein At1g04910-like (LOC104611914), mRNA}	{NA}
transcript_HQ_HBZL_transcript10767/f6p0/1502	1502	62.39	0	0	0	0	2.57	0	0	0	0	{CBI21313.3; unnamed protein product, partial [Vitis vinifera]}	{sp|Q0WQK2|ZDHC9_ARATH; Probable protein S-acyltransferase 7 OS=Arabidopsis thaliana GN=PAT07 PE=1 SV=1}	{nnu:104592803; K16675 ZDHHC9_14_18 palmitoyltransferase ZDHHC9/14/18 2.3.1.225 ko04391; Environmental Information Processing; Signal transduction; Hippo signaling pathway - fly}	{At5g41060; KOG1311 DHHC-type Zn-finger proteins R General function prediction only ;}	{GO:0016020; membrane; cellular_component}	{XM_010250824.1; PREDICTED: Nelumbo nucifera probable protein S-acyltransferase 7 (LOC104591795), mRNA}	{PF04893:Yip1 domain}
transcript_HQ_HBZL_transcript10768/f2p0/2013	2012	273.13	0	0	0	0	8.02	0	0	0	0	{XP_002274385.2; PREDICTED: uroporphyrinogen decarboxylase [Vitis vinifera]}	{sp|Q42967|DCUP_TOBAC; Uroporphyrinogen decarboxylase, chloroplastic OS=Nicotiana tabacum GN=DCUP PE=1 SV=1}	{vvi:100257034; K01599 hemE, UROD uroporphyrinogen decarboxylase 4.1.1.37 ko00860; Metabolism; Metabolism of cofactors and vitamins; Porphyrin and chlorophyll metabolism}	{At2g40490; KOG2872 Uroporphyrinogen decarboxylase H Coenzyme transport and metabolism ;}	{GO:0006779; porphyrin biosynthetic process; biological_process GO:0004853; uroporphyrinogen decarboxylase activity; molecular_function}	{XM_010254855.2; PREDICTED: Nelumbo nucifera uroporphyrinogen decarboxylase (LOC104594534), mRNA}	{PF01208:Uroporphyrinogen decarboxylase (URO-D)}
transcript_HQ_HBZL_transcript10769/f2p0/1975	1973	125	81	31	121	83	3.75	2.3	0.93	4.09	2.57	{XP_010261392.1; PREDICTED: protein ABHD17B-like [Nelumbo nucifera]}	{sp|Q6DEY3|AB17B_XENTR; Protein ABHD17B OS=Xenopus tropicalis GN=abhd17b PE=2 SV=1}	{nnu:104600233; - - - - -}	{At3g30380; KOG1552 Predicted alpha/beta hydrolase R General function prediction only ;}	{GO:0016042; lipid catabolic process; biological_process GO:0008236; serine-type peptidase activity; molecular_function GO:0004806; triglyceride lipase activity; molecular_function GO:0016787; hydrolase activity; molecular_function GO:0006508; proteolysis; biological_process}	{XM_002269238.3; PREDICTED: Vitis vinifera protein ABHD17B (LOC100259513), mRNA}	{PF03583:Secretory lipase PF01738:Dienelactone hydrolase family PF00326:Prolyl oligopeptidase family PF02230:Phospholipase/Carboxylesterase}
transcript_HQ_HBZL_transcript1076/f7p0/3707	3707	1468.12	0	9.12	0	35.64	22.05	0	0.14	0	0.55	{XP_010255459.1; PREDICTED: transforming growth factor-beta receptor-associated protein 1 [Nelumbo nucifera]}	{sp|A4IG72|TGFA1_DANRE; Transforming growth factor-beta receptor-associated protein 1 homolog OS=Danio rerio GN=tgfbrap1 PE=2 SV=1}	{nnu:104596129; K20177 VPS3, TGFBRAP1 vacuolar protein sorting-associated protein 3 - ko04138; Cellular Processes; Transport and catabolism; Autophagy - yeast}	{At1g22860; KOG2063 Vacuolar assembly/sorting proteins VPS39/VAM6/VPS3 U Intracellular trafficking, secretion, and vesicular transport ;}	{GO:0006886; intracellular protein transport; biological_process GO:0016192; vesicle-mediated transport; biological_process}	{XM_002270688.3; PREDICTED: Vitis vinifera transforming growth factor-beta receptor-associated protein 1 (LOC100251277), transcript variant X1, mRNA}	{PF00637:Region in Clathrin and VPS}
transcript_HQ_HBZL_transcript10770/f4p0/2012	2012	365	39	25	1	0	10.72	1.08	0.73	0.03	0	{XP_015951354.1; PREDICTED: fatty acyl-CoA reductase 2-like [Arachis duranensis]}	{sp|Q08891|FACR2_ARATH; Fatty acyl-CoA reductase 2 OS=Arabidopsis thaliana GN=FAR2 PE=2 SV=2}	{adu:107476124; K13356 FAR alcohol-forming fatty acyl-CoA reductase 1.2.1.84 ko00073; Metabolism; Lipid metabolism; Cutin, suberine and wax biosynthesis | ko04146; Cellular Processes; Transport and catabolism; Peroxisome | ko04212; Organismal Systems; Aging; Longevity regulating pathway - worm}	{At3g11980; KOG1221 Acyl-CoA reductase I Lipid transport and metabolism ;}	{GO:0050662; coenzyme binding; molecular_function GO:0003824; NA}	{XM_018993308.1; PREDICTED: Juglans regia fatty acyl-CoA reductase 2 (LOC109011917), mRNA}	{PF01370:NAD dependent epimerase/dehydratase family}
transcript_HQ_HBZL_transcript10773/f4p0/1980	1980	3313.6	0	0	0	0	99.06	0	0	0	0	{NA}	{NA}	{NA}	{NA}	{NA}	{NA}	{NA}
transcript_HQ_HBZL_transcript10774/f4p0/2006	2006	749	0	0	0	0	22.06	0	0	0	0	{XP_010276202.1; PREDICTED: pre-mRNA-processing factor 19-like [Nelumbo nucifera]}	{sp|Q9AV81|PRP19_ORYSJ; Pre-mRNA-processing factor 19 OS=Oryza sativa subsp. japonica GN=PRP19 PE=2 SV=1}	{lang:109339562; K10599 PRPF19, PRP19 pre-mRNA-processing factor 19 2.3.2.27 ko03040; Genetic Information Processing; Transcription; Spliceosome | ko04120; Genetic Information Processing; Folding, sorting and degradation; Ubiquitin mediated proteolysis; lang:109339562; - - - - -}	{At1g04510; KOG0289 mRNA splicing factor R General function prediction only ;}	{GO:0005515; protein binding; molecular_function GO:0016567; protein ubiquitination; biological_process GO:0004842; ubiquitin-protein ligase activity; molecular_function GO:0008270; zinc ion binding; molecular_function}	{XM_010277900.2; PREDICTED: Nelumbo nucifera pre-mRNA-processing factor 19-like (LOC104611002), mRNA}	{PF00400:WD domain, G-beta repeat PF04564:U-box domain PF11789:Zinc-finger of the MIZ type in Nse subunit}
transcript_HQ_HBZL_transcript10775/f2p0/1993	1995	0	0	0	0	0	0	0	0	0	0	{EOY14111.1; Receptor serine/threonine kinase [Theobroma cacao]}	{sp|P93604|LRK10_WHEAT; Rust resistance kinase Lr10 OS=Triticum aestivum GN=LRK10 PE=2 SV=1}	{egu:105039746; K04733 IRAK4 interleukin-1 receptor-associated kinase 4 2.7.11.1 ko04064; Environmental Information Processing; Signal transduction; NF-kappa B signaling pathway | ko04620; Organismal Systems; Immune system; Toll-like receptor signaling pathway | ko04624; Organismal Systems; Immune system; Toll and Imd signaling pathway | ko04621; Organismal Systems; Immune system; NOD-like recept…	{NA}	{GO:0004672; protein kinase activity; molecular_function GO:0006468; protein phosphorylation; biological_process GO:0005524; ATP binding; molecular_function}	{NA}	{PF00069:Protein kinase domain PF07714:Protein tyrosine kinase}
transcript_HQ_HBZL_transcript10776/f4p0/1975	1975	690.85	0	0	0	0	20.71	0	0	0	0	{XP_008342133.1; PREDICTED: probable plastidic glucose transporter 1 [Malus domestica]}	{sp|Q0WVE9|PLST1_ARATH; Probable plastidic glucose transporter 1 OS=Arabidopsis thaliana GN=At1g05030 PE=2 SV=2}	{vvi:100261947; - - - - -}	{At1g05030; KOG0254 Predicted transporter (major facilitator superfamily) R General function prediction only ;}	{GO:0022857; transmembrane transporter activity; molecular_function GO:0000041; transition metal ion transport; biological_process GO:0055085; transmembrane transport; biological_process GO:0016021; integral to membrane; cellular_component}	{NA}	{PF07690:Major Facilitator Superfamily PF01891:Cobalt uptake substrate-specific transmembrane region PF00083:Sugar (and other) transporter}
transcript_HQ_HBZL_transcript10778/f6p0/1925	1925	1867.51	0	0	0	0	57.65	0	0	0	0	{XP_008807839.1; PREDICTED: calnexin homolog [Phoenix dactylifera]}	{sp|Q39817|CALX_SOYBN; Calnexin homolog OS=Glycine max PE=2 SV=1}	{vvi:100259611; K08054 CANX calnexin - ko04141; Genetic Information Processing; Folding, sorting and degradation; Protein processing in endoplasmic reticulum | ko04145; Cellular Processes; Transport and catabolism; Phagosome | ko04612; Organismal Systems; Immune system; Antigen processing and presentation | ko04918; Organismal Systems; Endocrine system; Thyroid hormone synthesis | ko05166; Human …	{At5g61790; KOG0675 Calnexin O Posttranslational modification, protein turnover, chaperones ;}	{GO:0071436; sodium ion export; biological_process GO:0051082; unfolded protein binding; molecular_function GO:0016020; membrane; cellular_component GO:0005509; calcium ion binding; molecular_function GO:0008948; oxaloacetate decarboxylase activity; molecular_function GO:0006457; protein folding; biological_process GO:0005783; endoplasmic reticulum; cellular_component GO:0015081; sodium ion trans…	{XM_010251063.2; PREDICTED: Nelumbo nucifera calnexin homolog (LOC104591915), transcript variant X2, mRNA}	{PF04277:Oxaloacetate decarboxylase, gamma chain PF00262:Calreticulin family}
transcript_HQ_HBZL_transcript10779/f3p0/2005	2002	324.12	0	0.83	0	0	9.57	0	0.02	0	0	{XP_010248854.1; PREDICTED: glucose-6-phosphate 1-dehydrogenase, cytoplasmic isoform [Nelumbo nucifera]}	{sp|P37830|G6PD_SOLTU; Glucose-6-phosphate 1-dehydrogenase, cytoplasmic isoform OS=Solanum tuberosum GN=G6PDH PE=2 SV=1}	{spen:107011708; K00036 G6PD, zwf glucose-6-phosphate 1-dehydrogenase [EC:1.1.1.49 1.1.1.363] 1.1.1.49,1.1.1.363 ko01200; Metabolism; Global and overview maps; Carbon metabolism | ko00030; Metabolism; Carbohydrate metabolism; Pentose phosphate pathway | ko00480; Metabolism; Metabolism of other amino acids; Glutathione metabolism | ko05230; Human Diseases; Cancers: Overview; Central carbon metabol…	{At5g40760; KOG0563 Glucose-6-phosphate 1-dehydrogenase G Carbohydrate transport and metabolism ;}	{GO:0055114; oxidation-reduction process; biological_process GO:0050661; NADP binding; molecular_function GO:0006006; glucose metabolic process; biological_process GO:0004345; glucose-6-phosphate dehydrogenase activity; molecular_function}	{XM_010250554.2; PREDICTED: Nelumbo nucifera glucose-6-phosphate 1-dehydrogenase, cytoplasmic isoform (LOC104591632), transcript variant X3, mRNA}	{PF02781:Glucose-6-phosphate dehydrogenase, C-terminal domain PF00479:Glucose-6-phosphate dehydrogenase, NAD binding domain}
transcript_HQ_HBZL_transcript1077/f3p0/3706	3704	850.14	0	1	3.56	0	12.78	0	0.02	0.06	0	{XP_010269115.1; PREDICTED: presequence protease 2, chloroplastic/mitochondrial [Nelumbo nucifera]}	{sp|Q9LJL3|PREP1_ARATH; Presequence protease 1, chloroplastic/mitochondrial OS=Arabidopsis thaliana GN=PREP1 PE=1 SV=2}	{nnu:104605874; K06972 PITRM1, PreP, CYM1 presequence protease 3.4.24.- -}	{At3g19170; KOG2019 Metalloendoprotease HMP1 (insulinase superfamily) RO General function prediction only ; Posttranslational modification, protein turnover, chaperones ;}	{GO:0006508; proteolysis; biological_process}	{XM_010270813.2; PREDICTED: Nelumbo nucifera presequence protease 2, chloroplastic/mitochondrial (LOC104605874), mRNA}	{PF08367:Peptidase M16C associated}
transcript_HQ_HBZL_transcript10780/f2p0/1989	1988	299	1	0	2	0	8.9	0.03	0	0.07	0	{XP_010277464.1; PREDICTED: geraniol 8-hydroxylase-like [Nelumbo nucifera]}	{sp|Q8VWZ7|C76B6_CATRO; Geraniol 8-hydroxylase OS=Catharanthus roseus GN=CYP76B6 PE=1 SV=1}	{cic:CICLE_v10019826mg; - - - - -}	{At2g45550; KOG0156 Cytochrome P450 CYP2 subfamily Q Secondary metabolites biosynthesis, transport and catabolism ;}	{GO:0020037; heme binding; molecular_function GO:0005506; iron ion binding; molecular_function GO:0055114; oxidation-reduction process; biological_process GO:0016705; oxidoreductase activity, acting on paired donors, with incorporation or reduction of molecular oxygen; molecular_function}	{NA}	{PF00067:Cytochrome P450}
transcript_HQ_HBZL_transcript10783/f2p0/2000	2003	419.03	2	0	0	0	12.36	0.06	0	0	0	{XP_015866985.1; PREDICTED: conserved oligomeric Golgi complex subunit 2 [Ziziphus jujuba]}	{sp|Q84WJ2|PRI2_ARATH; Probable DNA primase large subunit OS=Arabidopsis thaliana GN=At1g67320 PE=2 SV=2}	{cic:CICLE_v10018979mg; K20289 COG2 conserved oligomeric Golgi complex subunit 2 - -}	{At4g24840; KOG2307 Low density lipoprotein receptor U Intracellular trafficking, secretion, and vesicular transport ;}	{GO:0006269; DNA replication, synthesis of RNA primer; biological_process GO:0003896; DNA primase activity; molecular_function GO:0003677; DNA binding; molecular_function}	{XM_010252460.2; PREDICTED: Nelumbo nucifera conserved oligomeric Golgi complex subunit 2 (LOC104592914), mRNA}	{PF04104:Eukaryotic and archaeal DNA primase, large subunit PF00633:Helix-hairpin-helix motif}
transcript_HQ_HBZL_transcript10784/f2p0/1991	1991	631.87	70	185	80	77	18.77	1.97	5.49	2.68	2.36	{XP_010248802.1; PREDICTED: uncharacterized protein LOC104591598 [Nelumbo nucifera]}	{sp|O80653|SKIP_ARATH; SNW/SKI-interacting protein OS=Arabidopsis thaliana GN=SKIP PE=1 SV=1}	{nnu:104591598; - - - - -}	{At3g47160; KOG1039 Predicted E3 ubiquitin ligase O Posttranslational modification, protein turnover, chaperones ;}	{GO:0005515; protein binding; molecular_function GO:0046872; metal ion binding; molecular_function GO:0008270; zinc ion binding; molecular_function}	{XM_006481144.2; PREDICTED: Citrus sinensis SNW/SKI-interacting protein (LOC102606884), mRNA}	{PF13639:Ring finger domain PF14634:zinc-RING finger domain PF00097:Zinc finger, C3HC4 type (RING finger)}
transcript_HQ_HBZL_transcript10785/f4p0/1987	1987	217.46	66.94	53.72	131.09	156.79	6.47	1.89	1.6	4.4	4.82	{XP_010244902.1; PREDICTED: C-type lectin receptor-like tyrosine-protein kinase At1g52310 [Nelumbo nucifera]}	{sp|Q9C823|Y1523_ARATH; C-type lectin receptor-like tyrosine-protein kinase At1g52310 OS=Arabidopsis thaliana GN=At1g52310 PE=2 SV=1}	{nnu:104592549; - - - - -}	{At1g52310; KOG1187 Serine/threonine protein kinase T Signal transduction mechanisms ;}	{GO:0006468; protein phosphorylation; biological_process GO:0004672; protein kinase activity; molecular_function GO:0005524; ATP binding; molecular_function}	{XM_010251975.2; PREDICTED: Nelumbo nucifera C-type lectin receptor-like tyrosine-protein kinase At1g52310 (LOC104592549), transcript variant X2, mRNA}	{PF07714:Protein tyrosine kinase PF00069:Protein kinase domain}
transcript_HQ_HBZL_transcript10787/f3p0/1982	1982	1398.26	0	0	0	0	41.75	0	0	0	0	{XP_010245870.1; PREDICTED: uncharacterized protein LOC104589305 [Nelumbo nucifera]}	{sp|Q54I39|IST1L_DICDI; IST1-like protein OS=Dictyostelium discoideum GN=DDB_G0289029 PE=3 SV=1}	{pper:PRUPE_ppa004125mg; K19476 IST1 vacuolar protein sorting-associated protein IST1 - ko04144; Cellular Processes; Transport and catabolism; Endocytosis}	{At1g34220; KOG2027 Spindle pole body protein Z Cytoskeleton ;}	{GO:0015031; protein transport; biological_process}	{XM_009404914.2; PREDICTED: Musa acuminata subsp. malaccensis ENHANCER OF AG-4 protein 2-like (LOC103986810), mRNA}	{PF03398:Regulator of Vps4 activity in the MVB pathway}
transcript_HQ_HBZL_transcript10788/f2p0/1969	1968	326	0	13.19	10.12	4.98	9.81	0	0.4	0.34	0.15	{XP_010274165.1; PREDICTED: uncharacterized protein LOC104609533 [Nelumbo nucifera]}	{NA}	{pper:PRUPE_ppa019591mg; - - - - -}	{NA}	{GO:0016301; kinase activity; molecular_function GO:0005524; ATP binding; molecular_function GO:0019083; viral transcription; biological_process}	{XM_006479513.1; PREDICTED: Citrus sinensis uncharacterized LOC102625818 (LOC102625818), mRNA}	{PF02456:Adenovirus IVa2 protein PF06414:Zeta toxin}
transcript_HQ_HBZL_transcript10791/f7p0/1977	1977	268	0	0	0	0	8.03	0	0	0	0	{XP_010248668.1; PREDICTED: uncharacterized protein LOC104591513 [Nelumbo nucifera]}	{NA}	{nnu:104591513; - - - - -}	{NA}	{NA}	{XM_011465931.1; PREDICTED: Fragaria vesca subsp. vesca uncharacterized LOC101313310 (LOC101313310), transcript variant X7, mRNA}	{NA}
transcript_HQ_HBZL_transcript10792/f9p0/2027	2028	712.67	8.54	12.59	0	0	20.73	0.24	0.37	0	0	{XP_006483762.1; PREDICTED: uncharacterized protein LOC102615522 [Citrus sinensis]}	{NA}	{vvi:100251867; - - - - -}	{NA}	{NA}	{XM_010273784.2; PREDICTED: Nelumbo nucifera uncharacterized LOC104607980 (LOC104607980), transcript variant X2, mRNA}	{NA}
transcript_HQ_HBZL_transcript10793/f2p0/1970	1970	314	1.99	18.08	25.01	23.12	9.44	0.06	0.54	0.85	0.72	{XP_008240258.1; PREDICTED: protein RETICULATA, chloroplastic [Prunus mume]}	{sp|B9DFK5|RETIC_ARATH; Protein RETICULATA, chloroplastic OS=Arabidopsis thaliana GN=RE PE=1 SV=1}	{pmum:103338780; - - - - -}	{NA}	{NA}	{XR_002108385.1; PREDICTED: Lupinus angustifolius protein RETICULATA, chloroplastic-like (LOC109352603), transcript variant X4, misc_RNA}	{NA}
transcript_HQ_HBZL_transcript10796/f2p0/1972	1972	32.06	16.67	0	2.77	0	0.96	0.47	0	0.09	0	{KMZ72603.1; GDP-mannose transporter GONST1 [Zostera marina]}	{sp|Q941R4|GONS1_ARATH; GDP-mannose transporter GONST1 OS=Arabidopsis thaliana GN=GONST1 PE=1 SV=2}	{egu:105037634; K15356 VRG4, GONST1 GDP-mannose transporter - -}	{At2g13650; KOG1444 Nucleotide-sugar transporter VRG4/SQV-7 GOU Carbohydrate transport and metabolism ; Posttranslational modification, protein turnover, chaperones ; Intracellular trafficking, secretion, and vesicular transport ;}	{GO:0016020; membrane; cellular_component GO:0016021; integral to membrane; cellular_component}	{XM_008812675.2; PREDICTED: Phoenix dactylifera GDP-mannose transporter GONST1 (LOC103722199), transcript variant X3, mRNA}	{PF00892:EamA-like transporter family}
transcript_HQ_HBZL_transcript10797/f24p0/1947	1948	2108	0	0	0	0	64.2	0	0	0	0	{XP_009622731.1; PREDICTED: uncharacterized protein LOC104114077 [Nicotiana tomentosiformis]}	{NA}	{nnu:104595565; - - - - -}	{NA}	{GO:0005515; protein binding; molecular_function}	{XM_012212688.1; PREDICTED: Jatropha curcas uncharacterized LOC105630751 (LOC105630751), mRNA}	{PF00564:PB1 domain}
transcript_HQ_HBZL_transcript10798/f2p0/1970	1970	142.78	0	0	0	0	4.29	0	0	0	0	{XP_010243240.1; PREDICTED: probable glucuronoxylan glucuronosyltransferase IRX7 [Nelumbo nucifera]}	{sp|Q9ZUV3|IRX7_ARATH; Probable glucuronoxylan glucuronosyltransferase IRX7 OS=Arabidopsis thaliana GN=IRX7 PE=2 SV=1}	{pvu:PHAVU_011G085300g; K20889 IRX7, FRA8, F8H probable glucuronoxylan glucuronosyltransferase IRX7 [EC2.4.1.-] - -}	{At2g28110; KOG1021 Acetylglucosaminyltransferase EXT1/exostosin 1 GMW Carbohydrate transport and metabolism ; Cell wall/membrane/envelope biogenesis ; Extracellular structures ;}	{NA}	{XM_013609382.1; Medicago truncatula glucuronoxylan glucuronosyltransferase, putative mRNA}	{NA}
transcript_HQ_HBZL_transcript1079/f11p0/3719	3719	827.18	0	0	0	0	12.38	0	0	0	0	{AML77148.1; putative LOV domain-containing protein [Thalictrum thalictroides]}	{sp|O48963|PHOT1_ARATH; Phototropin-1 OS=Arabidopsis thaliana GN=PHOT1 PE=1 SV=1}	{pop:POPTR_0001s35680g; K20715 PHOT phototropin 2.7.11.1 -}	{NA}	{GO:0005524; ATP binding; molecular_function GO:0004672; protein kinase activity; molecular_function GO:0006355; regulation of transcription, DNA-dependent; biological_process GO:0005515; protein binding; molecular_function GO:0006468; protein phosphorylation; biological_process}	{KU699124.1; Thalictrum thalictroides isolate GBVZ_2003631 putative LOV domain-containing protein mRNA, complete cds}	{PF00989:PAS fold PF08447:PAS fold PF00069:Protein kinase domain PF07714:Protein tyrosine kinase}
transcript_HQ_HBZL_transcript107/f2p0/5844	5847	532.6	110.24	28.85	7.81	5.68	4.95	0.97	0.27	0.08	0.05	{XP_010243411.1; PREDICTED: DDT domain-containing protein PTM [Nelumbo nucifera]}	{sp|F4JYC8|PTM_ARATH; DDT domain-containing protein PTM OS=Arabidopsis thaliana GN=PTM PE=1 SV=1}	{nnu:104587471; - - - - -}	{At5g22760; KOG1473 Nucleosome remodeling factor, subunit NURF301/BPTF BK Chromatin structure and dynamics ; Transcription ;}	{GO:0005515; protein binding; molecular_function}	{XM_007208324.1; Prunus persica hypothetical protein (PRUPE_ppa000408mg) mRNA, complete cds}	{PF00628:PHD-finger}
transcript_HQ_HBZL_transcript10801/f4p0/1973	1973	115.1	0	0	0	0	3.45	0	0	0	0	{XP_010269874.1; PREDICTED: heat shock factor protein HSF24 [Nelumbo nucifera]}	{sp|Q96320|HSFB1_ARATH; Heat stress transcription factor B-1 OS=Arabidopsis thaliana GN=HSFB1 PE=2 SV=2}	{nnu:104606401; K09419 HSFF heat shock transcription factor, other eukaryote - -}	{At4g36990; KOG0627 Heat shock transcription factor K Transcription ;}	{GO:0070206; protein trimerization; biological_process GO:0006355; regulation of transcription, DNA-dependent; biological_process GO:0006914; autophagy; biological_process GO:0043565; sequence-specific DNA binding; molecular_function GO:0003700; sequence-specific DNA binding transcription factor activity; molecular_function GO:0005634; nucleus; cellular_component}	{AP006148.1; Lotus japonicus genomic DNA, chromosome 2, clone: LjT41D09, TM0304, complete sequence}	{PF08961:Nuclear receptor-binding factor 2, autophagy regulator PF16331:TolA binding protein trimerisation PF09738:Double stranded RNA binding protein (DUF2051) PF00170:bZIP transcription factor PF00447:HSF-type DNA-binding}
transcript_HQ_HBZL_transcript10802/f3p0/1966	1966	133	0	0	0	0	4.01	0	0	0	0	{XP_010260709.1; PREDICTED: anthocyanidin 3-O-glucosyltransferase 2-like [Nelumbo nucifera]}	{sp|D3UAG0|U71K1_MALDO; UDP-glycosyltransferase 71K1 OS=Malus domestica GN=UGT71K1 PE=1 SV=1}	{nnu:104599738; - - - - -}	{At3g21760; KOG1192 UDP-glucuronosyl and UDP-glucosyl transferase GC Carbohydrate transport and metabolism ; Energy production and conversion ;}	{GO:0016758; transferase activity, transferring hexosyl groups; molecular_function GO:0008152; NA}	{XM_009768137.1; PREDICTED: Nicotiana sylvestris anthocyanidin 3-O-glucosyltransferase 2-like (LOC104217805), mRNA}	{PF04101:Glycosyltransferase family 28 C-terminal domain PF00201:UDP-glucoronosyl and UDP-glucosyl transferase}
transcript_HQ_HBZL_transcript10803/f3p0/2020	2021	712.38	0	38.9	106.53	73.02	20.81	0	1.14	3.51	2.2	{XP_010262459.1; PREDICTED: 3-isopropylmalate dehydratase large subunit, chloroplastic [Nelumbo nucifera]}	{sp|Q94AR8|LEUC_ARATH; 3-isopropylmalate dehydratase large subunit, chloroplastic OS=Arabidopsis thaliana GN=IIL1 PE=1 SV=1}	{sind:105158613; K01703 leuC 3-isopropylmalate/(R)-2-methylmalate dehydratase large subunit [EC:4.2.1.33 4.2.1.35] 4.2.1.33,4.2.1.35 ko01210; Metabolism; Global and overview maps; 2-Oxocarboxylic acid metabolism | ko01230; Metabolism; Global and overview maps; Biosynthesis of amino acids | ko00660; Metabolism; Carbohydrate metabolism; C5-Branched dibasic acid metabolism | ko00290; Metabolism; Ami…	{At4g13430; KOG0454 3-isopropylmalate dehydratase (aconitase superfamily) E Amino acid transport and metabolism ;}	{GO:0008152; NA}	{XM_010264157.2; PREDICTED: Nelumbo nucifera 3-isopropylmalate dehydratase large subunit, chloroplastic (LOC104600979), mRNA}	{PF00330:Aconitase family (aconitate hydratase)}
transcript_HQ_HBZL_transcript10808/f6p0/1974	1975	7413.44	0	0	0	0	222.27	0	0	0	0	{XP_010253296.1; PREDICTED: protein UPSTREAM OF FLC [Nelumbo nucifera]}	{sp|Q9LX14|UFC_ARATH; Protein UPSTREAM OF FLC OS=Arabidopsis thaliana GN=UFC PE=2 SV=1}	{nnu:104594618; - - - - -}	{NA}	{GO:0030246; carbohydrate binding; molecular_function GO:0016052; carbohydrate catabolic process; biological_process GO:0004553; hydrolase activity, hydrolyzing O-glycosyl compounds; molecular_function}	{NA}	{PF16011:Carbohydrate-binding family 9}
transcript_HQ_HBZL_transcript10809/f3p0/2005	2005	246.14	0	11.8	0	3.11	7.25	0	0.35	0	0.09	{NA}	{NA}	{NA}	{NA}	{NA}	{NA}	{NA}
transcript_HQ_HBZL_transcript10810/f14p0/1987	1988	1399.33	0	30.79	60.72	30.52	41.64	0	0.92	2.04	0.94	{XP_010267197.1; PREDICTED: 4-coumarate--CoA ligase-like 7 [Nelumbo nucifera]}	{sp|Q9M0X9|4CLL7_ARATH; 4-coumarate--CoA ligase-like 7 OS=Arabidopsis thaliana GN=4CLL7 PE=1 SV=1}	{pper:PRUPE_ppa003893mg; K01904 4CL 4-coumarate--CoA ligase 6.2.1.12 ko00360; Metabolism; Amino acid metabolism; Phenylalanine metabolism | ko00130; Metabolism; Metabolism of cofactors and vitamins; Ubiquinone and other terpenoid-quinone biosynthesis | ko00940; Metabolism; Biosynthesis of other secondary metabolites; Phenylpropanoid biosynthesis}	{At4g05160; KOG1176 Acyl-CoA synthetase I Lipid transport and metabolism ;}	{GO:0008152; NA GO:0003824; NA}	{KM099197.1; Betula pendula 4-coumarate:CoA ligase-like protein mRNA, complete cds}	{PF00501:AMP-binding enzyme}
transcript_HQ_HBZL_transcript10812/f3p0/1998	1997	299	0	0	0	0	8.85	0	0	0	0	{XP_010253768.1; PREDICTED: internal alternative NAD(P)H-ubiquinone oxidoreductase A1, mitochondrial-like isoform X1 [Nelumbo nucifera]}	{sp|O80874|NDA2_ARATH; Internal alternative NAD(P)H-ubiquinone oxidoreductase A2, mitochondrial OS=Arabidopsis thaliana GN=NDA2 PE=2 SV=1}	{nnu:104594915; K17871 ndh1 NADH:ubiquinone reductase (non-electrogenic) 1.6.5.9 -}	{At2g29990; KOG2495 NADH-dehydrogenase (ubiquinone) C Energy production and conversion ;}	{GO:0055114; oxidation-reduction process; biological_process GO:0016491; oxidoreductase activity; molecular_function}	{XM_013604817.1; Medicago truncatula NAD(P)H dehydrogenase B2 partial mRNA}	{PF07992:Pyridine nucleotide-disulphide oxidoreductase PF00070:Pyridine nucleotide-disulphide oxidoreductase}
transcript_HQ_HBZL_transcript10813/f2p0/2001	2001	321.56	0	0	0	0	9.5	0	0	0	0	{XP_010266820.1; PREDICTED: synaptotagmin-2-like [Nelumbo nucifera]}	{sp|B6ETT4|SYT2_ARATH; Synaptotagmin-2 OS=Arabidopsis thaliana GN=SYT2 PE=2 SV=1}	{jcu:105635319; - - - - -}	{At1g20080; KOG1012 Ca2+-dependent lipid-binding protein CLB1/vesicle protein vp115/Granuphilin A, contains C2 domain R General function prediction only ;}	{GO:0005515; protein binding; molecular_function GO:0008289; lipid binding; molecular_function}	{XM_002272721.4; PREDICTED: Vitis vinifera synaptotagmin-2 (LOC100260940), mRNA}	{PF00168:C2 domain PF17047:Synaptotagmin-like mitochondrial-lipid-binding domain}
transcript_HQ_HBZL_transcript10814/f4p0/1972	1972	1102	0	0	0	0	33.1	0	0	0	0	{XP_002273367.1; PREDICTED: glycerol kinase [Vitis vinifera]}	{sp|Q9M8L4|GLPK_ARATH; Glycerol kinase OS=Arabidopsis thaliana GN=GLPK PE=1 SV=1}	{sind:105164867; K00864 glpK, GK glycerol kinase 2.7.1.30 ko00561; Metabolism; Lipid metabolism; Glycerolipid metabolism | ko03320; Organismal Systems; Endocrine system; PPAR signaling pathway | ko04626; Organismal Systems; Environmental adaptation; Plant-pathogen interaction}	{At1g80460; KOG2517 Ribulose kinase and related carbohydrate kinases G Carbohydrate transport and metabolism ;}	{GO:0005975; carbohydrate metabolic process; biological_process GO:0016773; phosphotransferase activity, alcohol group as acceptor; molecular_function}	{XM_007215751.1; Prunus persica hypothetical protein (PRUPE_ppa004097mg) mRNA, complete cds}	{PF02782:FGGY family of carbohydrate kinases, C-terminal domain PF00370:FGGY family of carbohydrate kinases, N-terminal domain}
transcript_HQ_HBZL_transcript10815/f2p0/1981	1981	109.14	0	0	0	0	3.26	0	0	0	0	{NA}	{NA}	{NA}	{NA}	{NA}	{NA}	{NA}
transcript_HQ_HBZL_transcript10818/f6p0/1980	1980	820.98	0	0	0	0	24.54	0	0	0	0	{XP_010260631.1; PREDICTED: UDP-N-acetylglucosamine diphosphorylase 1-like [Nelumbo nucifera]}	{sp|Q940S3|UAP1_ARATH; UDP-N-acetylglucosamine diphosphorylase 1 OS=Arabidopsis thaliana GN=GLCNAC1PUT1 PE=1 SV=1}	{nnu:104599693; K00972 UAP1 UDP-N-acetylglucosamine/UDP-N-acetylgalactosamine diphosphorylase [EC:2.7.7.23 2.7.7.83] 2.7.7.23,2.7.7.83 ko00520; Metabolism; Carbohydrate metabolism; Amino sugar and nucleotide sugar metabolism}	{At1g31070; KOG2388 UDP-N-acetylglucosamine pyrophosphorylase M Cell wall/membrane/envelope biogenesis ;}	{GO:0008152; NA GO:0070569; uridylyltransferase activity; molecular_function}	{XM_010262329.2; PREDICTED: Nelumbo nucifera UDP-N-acetylglucosamine diphosphorylase 1-like (LOC104599693), mRNA}	{PF01704:UTP--glucose-1-phosphate uridylyltransferase}
transcript_HQ_HBZL_transcript10819/f15p0/1971	1971	1558	0	0	0	0	46.82	0	0	0	0	{XP_010256329.1; PREDICTED: protein SENSITIVE TO PROTON RHIZOTOXICITY 1 [Nelumbo nucifera]}	{sp|Q9C8N5|STOP1_ARATH; Protein SENSITIVE TO PROTON RHIZOTOXICITY 1 OS=Arabidopsis thaliana GN=STOP1 PE=2 SV=1}	{nnu:104596750; - - - - -}	{At1g34370; KOG1721 FOG: Zn-finger R General function prediction only ;}	{GO:0046872; metal ion binding; molecular_function}	{XM_014661396.1; PREDICTED: Vigna radiata var. radiata protein SENSITIVE TO PROTON RHIZOTOXICITY 1-like (LOC106774407), mRNA}	{PF00096:Zinc finger, C2H2 type}
transcript_HQ_HBZL_transcript10820/f3p0/1964	1964	391.47	0	0	0	0	11.81	0	0	0	0	{OMO67052.1; Very-long-chain 3-ketoacyl-CoA synthase [Corchorus capsularis]}	{sp|Q570B4|KCS10_ARATH; 3-ketoacyl-CoA synthase 10 OS=Arabidopsis thaliana GN=FDH PE=1 SV=2}	{pmum:103320669; K15397 KCS 3-ketoacyl-CoA synthase 2.3.1.199 ko00062; Metabolism; Lipid metabolism; Fatty acid elongation}	{NA}	{GO:0016747; transferase activity, transferring acyl groups other than amino-acyl groups; molecular_function GO:0004315; 3-oxoacyl-[acyl-carrier-protein] synthase activity; molecular_function GO:0005267; potassium channel activity; molecular_function GO:0016020; membrane; cellular_component GO:0006633; fatty acid biosynthetic process; biological_process}	{XM_003526038.3; PREDICTED: Glycine max 3-ketoacyl-CoA synthase 10-like (LOC100818799), mRNA}	{PF11956:Ankyrin-G binding motif of KCNQ2-3 PF08392:FAE1/Type III polyketide synthase-like protein PF08545:3-Oxoacyl-[acyl-carrier-protein (ACP)] synthase III}
transcript_HQ_HBZL_transcript10821/f5p0/1998	1998	355	31.27	27.6	0	0	10.5	0.88	0.82	0	0	{BAF98466.1; cytochrome P450 [Coptis japonica var. dissecta]}	{sp|H2DH21|C7A29_PANGI; Cytochrome P450 CYP72A219 OS=Panax ginseng PE=2 SV=1}	{nnu:104610317; - - - - -}	{At3g14660; KOG0157 Cytochrome P450 CYP4/CYP19/CYP26 subfamilies QI Secondary metabolites biosynthesis, transport and catabolism ; Lipid transport and metabolism ;}	{GO:0005506; iron ion binding; molecular_function GO:0020037; heme binding; molecular_function GO:0016705; oxidoreductase activity, acting on paired donors, with incorporation or reduction of molecular oxygen; molecular_function GO:0055114; oxidation-reduction process; biological_process}	{XM_016076859.1; PREDICTED: Arachis duranensis cytochrome P450 CYP72A219-like (LOC107458642), mRNA}	{PF00067:Cytochrome P450}
transcript_HQ_HBZL_transcript10823/f4p0/2019	2020	321.32	0	0	2	0	9.39	0	0	0.07	0	{XP_002283965.1; PREDICTED: putative E3 ubiquitin-protein ligase XBAT31 [Vitis vinifera]}	{sp|Q94B55|XB31_ARATH; Putative E3 ubiquitin-protein ligase XBAT31 OS=Arabidopsis thaliana GN=XBAT31 PE=2 SV=1}	{nnu:104594558; - - - - -}	{NA}	{GO:0005515; protein binding; molecular_function GO:0008270; zinc ion binding; molecular_function GO:0046872; metal ion binding; molecular_function}	{XM_007207398.1; Prunus persica hypothetical protein (PRUPE_ppa005792mg) mRNA, complete cds}	{PF00097:Zinc finger, C3HC4 type (RING finger) PF13606:Ankyrin repeat PF13639:Ring finger domain PF00023:Ankyrin repeat}
transcript_HQ_HBZL_transcript10824/f2p0/1980	1980	55.63	0	0	1	0	1.66	0	0	0.03	0	{XP_016552830.1; PREDICTED: protein ABHD18 isoform X1 [Capsicum annuum]}	{sp|Q8C1A9|ABD18_MOUSE; Protein ABHD18 OS=Mus musculus GN=Abhd18 PE=2 SV=1}	{cann:107852278; - - - - -}	{At3g12150; KOG1551 Uncharacterized conserved protein S Function unknown ;}	{NA}	{XM_017560504.1; PREDICTED: Vigna angularis protein ABHD18 (LOC108326901), mRNA}	{NA}
transcript_HQ_HBZL_transcript10825/f3p0/1989	1989	392	215.84	269.58	0	0	11.66	6.08	8.01	0	0	{XP_010244877.1; PREDICTED: protein NUCLEAR FUSION DEFECTIVE 4 [Nelumbo nucifera]}	{sp|F4I9E1|NFD4_ARATH; Protein NUCLEAR FUSION DEFECTIVE 4 OS=Arabidopsis thaliana GN=NFD4 PE=3 SV=1}	{vvi:100251745; - - - - -}	{NA}	{GO:0055085; transmembrane transport; biological_process GO:0016021; integral to membrane; cellular_component}	{XM_007013576.2; PREDICTED: Theobroma cacao protein NUCLEAR FUSION DEFECTIVE 4 (LOC18588879), mRNA}	{PF07690:Major Facilitator Superfamily}
transcript_HQ_HBZL_transcript10826/f4p0/1968	1967	163	0	0	0	0	4.91	0	0	0	0	{NA}	{NA}	{NA}	{NA}	{NA}	{NA}	{NA}
transcript_HQ_HBZL_transcript10828/f3p0/1977	1977	151	0	0	0	0	4.52	0	0	0	0	{XP_009594272.1; PREDICTED: premnaspirodiene oxygenase-like [Nicotiana tomentosiformis]}	{sp|A6YIH8|C7D55_HYOMU; Premnaspirodiene oxygenase OS=Hyoscyamus muticus GN=CYP71D55 PE=1 SV=1}	{nta:107776996; - - - - -}	{At3g26210; KOG0156 Cytochrome P450 CYP2 subfamily Q Secondary metabolites biosynthesis, transport and catabolism ;}	{GO:0020037; heme binding; molecular_function GO:0005506; iron ion binding; molecular_function GO:0016705; oxidoreductase activity, acting on paired donors, with incorporation or reduction of molecular oxygen; molecular_function GO:0055114; oxidation-reduction process; biological_process}	{XM_004135234.2; PREDICTED: Cucumis sativus cytochrome P450 71B37-like (LOC101203858), mRNA}	{PF00067:Cytochrome P450}
transcript_HQ_HBZL_transcript1082/f5p0/3662	3662	857	0	0	0	0	13.04	0	0	0	0	{XP_002276824.2; PREDICTED: FACT complex subunit SPT16 [Vitis vinifera]}	{sp|Q7X923|SPT16_ORYSJ; FACT complex subunit SPT16 OS=Oryza sativa subsp. japonica GN=SPT16 PE=2 SV=2}	{nnu:104608426; - - - - -}	{At4g10710; KOG1189 Global transcriptional regulator, cell division control protein E Amino acid transport and metabolism ;}	{NA}	{XM_010278225.2; PREDICTED: Nelumbo nucifera FACT complex subunit SPT16-like (LOC104611246), mRNA}	{NA}
transcript_HQ_HBZL_transcript10830/f2p0/1973	1973	89.51	3.09	11.17	11.19	16.76	2.69	0.09	0.33	0.38	0.52	{ONK70754.1; uncharacterized protein A4U43_C04F1180 [Asparagus officinalis]}	{sp|Q84LB6|SUCB_SOLLC; Succinate--CoA ligase [ADP-forming] subunit beta, mitochondrial OS=Solanum lycopersicum PE=1 SV=1}	{pda:103703918; K01900 LSC2 succinyl-CoA synthetase beta subunit [EC:6.2.1.4 6.2.1.5] 6.2.1.4,6.2.1.5 ko01200; Metabolism; Global and overview maps; Carbon metabolism | ko00020; Metabolism; Carbohydrate metabolism; Citrate cycle (TCA cycle) | ko00640; Metabolism; Carbohydrate metabolism; Propanoate metabolism}	{At2g20420; KOG2799 Succinyl-CoA synthetase, beta subunit C Energy production and conversion ;}	{GO:0008152; NA GO:0003824; NA}	{XM_010264096.2; PREDICTED: Nelumbo nucifera succinate--CoA ligase [ADP-forming] subunit beta, mitochondrial-like (LOC104600926), mRNA}	{PF00549:CoA-ligase}
transcript_HQ_HBZL_transcript10833/f6p0/1990	1990	299	107.13	73.08	0	0	8.89	3.01	2.17	0	0	{OMO68278.1; hypothetical protein CCACVL1_19996 [Corchorus capsularis]}	{NA}	{rcu:8268022; - - - - -}	{NA}	{NA}	{NA}	{NA}
transcript_HQ_HBZL_transcript10835/f2p0/1980	1979	1.42	21.62	2.21	0	0	0.04	0.61	0.07	0	0	{NA}	{NA}	{egu:105044012; K13091 RBM39, RNPC2 RNA-binding protein 39 - -}	{NA}	{NA}	{AC253919.1; Aquilegia coerulea clone COL02-M05, complete sequence}	{NA}
transcript_HQ_HBZL_transcript10838/f4p0/1982	1982	1301.79	0	0	0	0	38.87	0	0	0	0	{XP_010257370.1; PREDICTED: uncharacterized protein LOC104597491 [Nelumbo nucifera]}	{NA}	{nnu:104597491; - - - - -}	{NA}	{NA}	{NA}	{NA}
transcript_HQ_HBZL_transcript10839/f5p0/1998	1997	358.05	0	0	0	0	10.6	0	0	0	0	{XP_010254953.1; PREDICTED: UPF0496 protein At4g34320-like [Nelumbo nucifera]}	{sp|Q9SYZ7|U496A_ARATH; UPF0496 protein At4g34320 OS=Arabidopsis thaliana GN=At4g34320 PE=2 SV=1}	{nnu:104595769; - - - - -}	{NA}	{NA}	{NA}	{NA}
transcript_HQ_HBZL_transcript1083/f8p0/3751	3748	1050	40.92	20.83	0	0	15.58	0.57	0.31	0	0	{XP_010240957.1; PREDICTED: autophagy-related protein 18f-like [Nelumbo nucifera]}	{sp|Q8GUL1|AT18G_ARATH; Autophagy-related protein 18g OS=Arabidopsis thaliana GN=ATG18G PE=2 SV=1}	{pmum:103342493; - - - - -}	{At1g54710; KOG2109 WD40 repeat protein R General function prediction only ;}	{GO:0005515; protein binding; molecular_function}	{XM_016042672.1; PREDICTED: Ziziphus jujuba autophagy-related protein 18f (LOC107431682), transcript variant X2, mRNA}	{PF00400:WD domain, G-beta repeat}
transcript_HQ_HBZL_transcript10841/f4p0/1962	1962	2827	102.64	907.75	1064.17	1092.64	85.4	2.93	27.39	36.22	34.07	{XP_010278707.1; PREDICTED: UPF0051 protein ABCI8, chloroplastic [Nelumbo nucifera]}	{sp|Q9ZS97|AB8I_ARATH; UPF0051 protein ABCI8, chloroplastic OS=Arabidopsis thaliana GN=ABCI8 PE=2 SV=1}	{vvi:100266599; - - - - -}	{NA}	{GO:0016226; iron-sulfur cluster assembly; biological_process}	{XM_016893975.1; PREDICTED: Gossypium hirsutum UPF0051 protein ABCI8, chloroplastic-like (LOC107958263), mRNA}	{PF01458:Uncharacterized protein family (UPF0051)}
transcript_HQ_HBZL_transcript10843/f2p0/2016	2016	373	6	25.97	11	9	10.93	0.17	0.76	0.36	0.27	{XP_012067958.1; PREDICTED: serine/threonine-protein kinase-like protein At1g28390 [Jatropha curcas]}	{sp|Q9SGN7|CCR12_ARATH; Serine/threonine-protein kinase-like protein At1g28390 OS=Arabidopsis thaliana GN=At1g28390 PE=2 SV=1}	{jcu:105630677; K04733 IRAK4 interleukin-1 receptor-associated kinase 4 2.7.11.1 ko04064; Environmental Information Processing; Signal transduction; NF-kappa B signaling pathway | ko04620; Organismal Systems; Immune system; Toll-like receptor signaling pathway | ko04624; Organismal Systems; Immune system; Toll and Imd signaling pathway | ko04621; Organismal Systems; Immune system; NOD-like recept…	{At1g28390; KOG1187 Serine/threonine protein kinase T Signal transduction mechanisms ;}	{GO:0016773; phosphotransferase activity, alcohol group as acceptor; molecular_function GO:0005524; ATP binding; molecular_function GO:0006468; protein phosphorylation; biological_process GO:0016020; membrane; cellular_component GO:0004672; protein kinase activity; molecular_function}	{XM_012210247.1; PREDICTED: Jatropha curcas serine/threonine-protein kinase-like protein At3g51990 (LOC105628770), mRNA}	{PF07714:Protein tyrosine kinase PF00069:Protein kinase domain PF06293:Lipopolysaccharide kinase (Kdo/WaaP) family}
transcript_HQ_HBZL_transcript10844/f5p0/1501	1501	193	0	6.52	19.1	16.27	7.96	0	0.27	0.89	0.69	{XP_010273586.1; PREDICTED: uncharacterized protein LOC104609074 [Nelumbo nucifera]}	{NA}	{csv:101215808; - - - - -}	{NA}	{GO:0016020; membrane; cellular_component GO:0008375; acetylglucosaminyltransferase activity; molecular_function}	{NA}	{PF02485:Core-2/I-Branching enzyme}
transcript_HQ_HBZL_transcript10846/f4p0/1971	1971	403.99	0	7.62	41.45	51.24	12.14	0	0.23	1.4	1.59	{XP_010242910.1; PREDICTED: non-canonical poly(A) RNA polymerase PAPD5 [Nelumbo nucifera]}	{sp|Q8NDF8|PAPD5_HUMAN; Non-canonical poly(A) RNA polymerase PAPD5 OS=Homo sapiens GN=PAPD5 PE=1 SV=2}	{egu:105043648; K03514 PAPD5_7, TRF4 non-canonical poly(A) RNA polymerase PAPD5/7 2.7.7.19 ko03018; Genetic Information Processing; Folding, sorting and degradation; RNA degradation}	{At5g53770; KOG1906 DNA polymerase sigma L Replication, recombination and repair ;}	{GO:0016779; nucleotidyltransferase activity; molecular_function}	{XM_010244608.2; PREDICTED: Nelumbo nucifera non-canonical poly(A) RNA polymerase PAPD5 (LOC104587135), mRNA}	{PF01909:Nucleotidyltransferase domain}
transcript_HQ_HBZL_transcript10847/f2p0/1961	1961	751.87	0	62.23	119.06	49.29	22.73	0	1.88	4.06	1.54	{OAY32904.1; hypothetical protein MANES_13G054900 [Manihot esculenta]}	{sp|P37890|CBP1_ORYSJ; Serine carboxypeptidase 1 OS=Oryza sativa subsp. japonica GN=CBP1 PE=2 SV=1}	{nnu:104593491; K16296 SCPL-I serine carboxypeptidase-like clade I 3.4.16.- -}	{At3g25420; KOG1282 Serine carboxypeptidases (lysosomal cathepsin A) OE Posttranslational modification, protein turnover, chaperones ; Amino acid transport and metabolism ;}	{GO:0004185; serine-type carboxypeptidase activity; molecular_function GO:0006508; proteolysis; biological_process}	{XM_016038114.1; PREDICTED: Ziziphus jujuba serine carboxypeptidase-like 20 (LOC107427732), transcript variant X2, mRNA}	{PF00450:Serine carboxypeptidase}
transcript_HQ_HBZL_transcript10849/f2p0/1982	1982	483.88	0	0	0	0	14.45	0	0	0	0	{XP_015572281.1; PREDICTED: chaperone protein DnaJ [Ricinus communis]}	{NA}	{nnu:104591728; - - - - -}	{NA}	{GO:0031072; heat shock protein binding; molecular_function GO:0051082; unfolded protein binding; molecular_function}	{NA}	{PF00684:DnaJ central domain}
transcript_HQ_HBZL_transcript1084/f2p0/3777	3777	879	0	0	0	0	12.94	0	0	0	0	{XP_008341624.1; PREDICTED: probable ubiquitin conjugation factor E4 [Malus domestica]}	{sp|Q9LF41|UBE4_ARATH; Probable ubiquitin conjugation factor E4 OS=Arabidopsis thaliana GN=PUB1 PE=2 SV=1}	{nnu:104598018; K10597 UBE4B, UFD2 ubiquitin conjugation factor E4 B 2.3.2.27 ko04141; Genetic Information Processing; Folding, sorting and degradation; Protein processing in endoplasmic reticulum | ko04120; Genetic Information Processing; Folding, sorting and degradation; Ubiquitin mediated proteolysis}	{At5g15400; KOG2042 Ubiquitin fusion degradation protein-2 O Posttranslational modification, protein turnover, chaperones ;}	{GO:0006511; ubiquitin-dependent protein catabolic process; biological_process GO:0034450; ubiquitin-ubiquitin ligase activity; molecular_function GO:0016567; protein ubiquitination; biological_process GO:0004842; ubiquitin-protein ligase activity; molecular_function GO:0000151; ubiquitin ligase complex; cellular_component}	{XM_016024378.1; PREDICTED: Ziziphus jujuba probable ubiquitin conjugation factor E4 (LOC107415942), mRNA}	{PF10408:Ubiquitin elongating factor core PF04564:U-box domain}
transcript_HQ_HBZL_transcript10850/f4p0/1971	1971	868	1	5	0	0	26.08	0.03	0.15	0	0	{XP_010244962.1; PREDICTED: protein IQ-DOMAIN 1-like [Nelumbo nucifera]}	{sp|Q9SF32|IQD1_ARATH; Protein IQ-DOMAIN 1 OS=Arabidopsis thaliana GN=IQD1 PE=1 SV=1}	{nnu:104594778; - - - - -}	{NA}	{GO:0005515; protein binding; molecular_function}	{XM_002315246.2; Populus trichocarpa hypothetical protein (POPTR_0010s22510g) mRNA, complete cds}	{PF00612:IQ calmodulin-binding motif}
transcript_HQ_HBZL_transcript10853/f2p0/1977	1977	120.52	0	0	0	0	3.61	0	0	0	0	{XP_010246375.1; PREDICTED: aspartic proteinase-like protein 2 [Nelumbo nucifera]}	{sp|Q9S9K4|ASPL2_ARATH; Aspartic proteinase-like protein 2 OS=Arabidopsis thaliana GN=At1g65240 PE=1 SV=2}	{cmo:103485799; - - - - -}	{At1g05840; KOG1339 Aspartyl protease O Posttranslational modification, protein turnover, chaperones ;}	{NA}	{XM_010248073.2; PREDICTED: Nelumbo nucifera aspartic proteinase-like protein 2 (LOC104589675), mRNA}	{NA}
transcript_HQ_HBZL_transcript10854/f2p0/1991	1991	444	0	0	0	0	13.19	0	0	0	0	{XP_010277817.1; PREDICTED: inositol 1,3,4-trisphosphate 5/6-kinase 4 isoform X1 [Nelumbo nucifera]}	{sp|B8BDK0|ITPK6_ORYSI; Inositol-tetrakisphosphate 1-kinase 6 OS=Oryza sativa subsp. indica GN=ITPK6 PE=3 SV=1}	{pper:PRUPE_ppa004313mg; - - - - -}	{NA}	{GO:0005524; ATP binding; molecular_function GO:0005622; intracellular; cellular_component GO:0032957; inositol trisphosphate metabolic process; biological_process GO:0000287; magnesium ion binding; molecular_function GO:0052725; NA GO:0052726; NA GO:0047325; inositol tetrakisphosphate 1-kinase activity; molecular_function}	{NA}	{PF05770:Inositol 1, 3, 4-trisphosphate 5/6-kinase}
transcript_HQ_HBZL_transcript10857/f2p0/1972	1972	347.49	0	0	0	0	10.44	0	0	0	0	{CBI34027.3; unnamed protein product, partial [Vitis vinifera]}	{sp|P47924|RIBA1_ARATH; Bifunctional riboflavin biosynthesis protein RIBA 1, chloroplastic OS=Arabidopsis thaliana GN=RIBA1 PE=1 SV=2}	{jcu:105631601; K14652 ribBA 3,4-dihydroxy 2-butanone 4-phosphate synthase / GTP cyclohydrolase II [EC:4.1.99.12 3.5.4.25] 4.1.99.12,3.5.4.25 ko00740; Metabolism; Metabolism of cofactors and vitamins; Riboflavin metabolism}	{At5g64300; KOG1284 Bifunctional GTP cyclohydrolase II/3,4-dihydroxy-2butanone-4-phosphate synthase H Coenzyme transport and metabolism ;}	{GO:0008686; 3,4-dihydroxy-2-butanone-4-phosphate synthase activity; molecular_function GO:0009231; riboflavin biosynthetic process; biological_process}	{XM_010274674.2; PREDICTED: Nelumbo nucifera bifunctional riboflavin biosynthesis protein RIBA 1, chloroplastic-like (LOC104608633), mRNA}	{PF00926:3,4-dihydroxy-2-butanone 4-phosphate synthase}
transcript_HQ_HBZL_transcript10859/f2p0/2031	2031	252	0	0	0	0	7.32	0	0	0	0	{XP_010257247.1; PREDICTED: dicarboxylate transporter 1, chloroplastic [Nelumbo nucifera]}	{sp|Q9LXV3|DIT1_ARATH; Dicarboxylate transporter 1, chloroplastic OS=Arabidopsis thaliana GN=DIT1 PE=1 SV=1}	{nnu:104597424; - - - - -}	{NA}	{GO:0016021; integral to membrane; cellular_component GO:0006814; sodium ion transport; biological_process GO:0055085; transmembrane transport; biological_process GO:0005215; NA GO:0016020; membrane; cellular_component}	{XM_011027227.1; PREDICTED: Populus euphratica dicarboxylate transporter 1, chloroplastic-like (LOC105126377), mRNA}	{PF00939:Sodium:sulfate symporter transmembrane region PF03600:Citrate transporter}
transcript_HQ_HBZL_transcript1085/f3p0/3615	3615	959.44	0	0	0	0	14.8	0	0	0	0	{XP_010274994.1; PREDICTED: dynamin-2A [Nelumbo nucifera]}	{sp|Q9LQ55|DRP2B_ARATH; Dynamin-2B OS=Arabidopsis thaliana GN=DRP2B PE=1 SV=2}	{pda:103699261; K01528 DNM dynamin GTPase 3.6.5.5 ko04072; Environmental Information Processing; Signal transduction; Phospholipase D signaling pathway | ko04144; Cellular Processes; Transport and catabolism; Endocytosis | ko04961; Organismal Systems; Excretory system; Endocrine and other factor-regulated calcium reabsorption | ko04721; Organismal Systems; Nervous system; Synaptic vesicle cycle |…	{At1g59610; KOG0446 Vacuolar sorting protein VPS1, dynamin, and related proteins UR Intracellular trafficking, secretion, and vesicular transport ; General function prediction only ;}	{GO:0006355; regulation of transcription, DNA-dependent; biological_process GO:0003700; sequence-specific DNA binding transcription factor activity; molecular_function GO:0009424; bacterial-type flagellum hook; cellular_component GO:0005525; GTP binding; molecular_function GO:0003924; GTPase activity; molecular_function}	{XM_010276692.2; PREDICTED: Nelumbo nucifera dynamin-2A (LOC104610181), mRNA}	{PF02465:Flagellar hook-associated protein 2 N-terminus PF01031:Dynamin central region PF02212:Dynamin GTPase effector domain PF02045:CCAAT-binding transcription factor (CBF-B/NF-YA) subunit B}
transcript_HQ_HBZL_transcript10860/f13p0/1977	1977	926.22	0	0	0	0	27.74	0	0	0	0	{XP_010251563.1; PREDICTED: BTB/POZ domain-containing protein POB1 isoform X2 [Nelumbo nucifera]}	{sp|Q9FPW6|POB1_ARATH; BTB/POZ domain-containing protein POB1 OS=Arabidopsis thaliana GN=POB1 PE=2 SV=2}	{nnu:104593428; - - - - -}	{NA}	{GO:0005515; protein binding; molecular_function}	{XM_010253261.2; PREDICTED: Nelumbo nucifera BTB/POZ domain-containing protein POB1 (LOC104593428), transcript variant X2, mRNA}	{PF00651:BTB/POZ domain}
transcript_HQ_HBZL_transcript10861/f3p0/1993	1993	468	0	0	0	0	13.89	0	0	0	0	{XP_010250375.1; PREDICTED: probable acyl-activating enzyme 5, peroxisomal [Nelumbo nucifera]}	{sp|Q9FFE6|AAE5_ARATH; Probable acyl-activating enzyme 5, peroxisomal OS=Arabidopsis thaliana GN=AAE5 PE=2 SV=1}	{nnu:104592630; - - - - -}	{At5g16370; KOG1176 Acyl-CoA synthetase I Lipid transport and metabolism ;}	{GO:0003824; NA GO:0008152; NA}	{XM_006371312.1; Populus trichocarpa AMP-binding family protein (POPTR_0019s09570g) mRNA, complete cds}	{PF00501:AMP-binding enzyme}
transcript_HQ_HBZL_transcript10864/f2p0/1946	1944	485.67	0	2.08	5.29	11.13	14.83	0	0.06	0.18	0.35	{KVH95742.1; DNA/RNA helicase, DEAD/DEAH box type, N-terminal [Cynara cardunculus var. scolymus]}	{sp|P93008|RH21_ARATH; DEAD-box ATP-dependent RNA helicase 21 OS=Arabidopsis thaliana GN=RH21 PE=2 SV=1}	{nnu:104591903; K12858 DDX23, PRP28 ATP-dependent RNA helicase DDX23/PRP28 3.6.4.13 ko03040; Genetic Information Processing; Transcription; Spliceosome}	{At2g33730; KOG0333 U5 snRNP-like RNA helicase subunit A RNA processing and modification ;}	{GO:0005524; ATP binding; molecular_function GO:0033014; tetrapyrrole biosynthetic process; biological_process GO:0003677; DNA binding; molecular_function GO:0003676; nucleic acid binding; molecular_function GO:0004852; uroporphyrinogen-III synthase activity; molecular_function GO:0016787; hydrolase activity; molecular_function}	{XM_010251039.2; PREDICTED: Nelumbo nucifera DEAD-box ATP-dependent RNA helicase 21 (LOC104591903), mRNA}	{PF04851:Type III restriction enzyme, res subunit PF02602:Uroporphyrinogen-III synthase HemD PF00270:DEAD/DEAH box helicase}
transcript_HQ_HBZL_transcript10865/f2p0/1948	1947	105.19	0	0	0	0	3.21	0	0	0	0	{XP_012093175.1; PREDICTED: probable zinc metallopeptidase EGY3, chloroplastic isoform X1 [Jatropha curcas]}	{sp|Q9LMU1|EGY3_ARATH; Probable zinc metallopeptidase EGY3, chloroplastic OS=Arabidopsis thaliana GN=EGY3 PE=1 SV=1}	{jcu:105650821; - - - - -}	{NA}	{GO:0005634; nucleus; cellular_component GO:0045893; positive regulation of transcription, DNA-dependent; biological_process GO:0006508; proteolysis; biological_process GO:0004222; metalloendopeptidase activity; molecular_function}	{XM_007042624.2; PREDICTED: Theobroma cacao probable zinc metallopeptidase EGY3, chloroplastic (LOC18608118), mRNA}	{PF02163:Peptidase family M50 PF04814:Hepatocyte nuclear factor 1 (HNF-1), N terminus}
transcript_HQ_HBZL_transcript10867/f3p0/1978	1978	582.47	0	0	0	0	17.43	0	0	0	0	{BAO04176.1; hypothetical protein [Delphinium grandiflorum]}	{sp|Q9FZE0|BGL40_ARATH; Beta-glucosidase 40 OS=Arabidopsis thaliana GN=BGLU40 PE=2 SV=1}	{jcu:105630530; K01188 E3.2.1.21 beta-glucosidase 3.2.1.21 ko00500; Metabolism; Carbohydrate metabolism; Starch and sucrose metabolism | ko00460; Metabolism; Metabolism of other amino acids; Cyanoamino acid metabolism | ko00940; Metabolism; Biosynthesis of other secondary metabolites; Phenylpropanoid biosynthesis}	{At1g26560; KOG0626 Beta-glucosidase, lactase phlorizinhydrolase, and related proteins G Carbohydrate transport and metabolism ;}	{GO:0004553; hydrolase activity, hydrolyzing O-glycosyl compounds; molecular_function GO:0005975; carbohydrate metabolic process; biological_process}	{XM_011013919.1; PREDICTED: Populus euphratica beta-glucosidase 40 (LOC105116518), mRNA}	{PF00232:Glycosyl hydrolase family 1 PF00150:Cellulase (glycosyl hydrolase family 5)}
transcript_HQ_HBZL_transcript10868/f2p0/1975	1974	1153.32	0	1	0	5.01	34.6	0	0.03	0	0.16	{XP_006448012.1; hypothetical protein CICLE_v10014944mg [Citrus clementina]}	{sp|P49299|CYSZ_CUCMA; Citrate synthase, glyoxysomal OS=Cucurbita maxima PE=1 SV=1}	{vvi:100255795; K01647 CS, gltA citrate synthase 2.3.3.1 ko01200; Metabolism; Global and overview maps; Carbon metabolism | ko01210; Metabolism; Global and overview maps; 2-Oxocarboxylic acid metabolism | ko01230; Metabolism; Global and overview maps; Biosynthesis of amino acids | ko00020; Metabolism; Carbohydrate metabolism; Citrate cycle (TCA cycle) | ko00630; Metabolism; Carbohydrate metabolis…	{At3g58750; KOG2617 Citrate synthase C Energy production and conversion ;}	{GO:0046912; transferase activity, transferring acyl groups, acyl groups converted into alkyl on transfer; molecular_function}	{XM_018958695.1; PREDICTED: Juglans regia citrate synthase, glyoxysomal (LOC108986174), mRNA}	{PF00285:Citrate synthase, C-terminal domain}
transcript_HQ_HBZL_transcript10869/f3p0/1972	1972	1183.92	1	0	0	0	35.56	0.03	0	0	0	{XP_010267128.1; PREDICTED: hexokinase-1-like [Nelumbo nucifera]}	{sp|Q9SEK3|HXK1_SPIOL; Hexokinase-1 OS=Spinacia oleracea GN=HXK1 PE=2 SV=1}	{nnu:104592043; K00844 HK hexokinase 2.7.1.1 ko01200; Metabolism; Global and overview maps; Carbon metabolism | ko00010; Metabolism; Carbohydrate metabolism; Glycolysis / Gluconeogenesis | ko00051; Metabolism; Carbohydrate metabolism; Fructose and mannose metabolism | ko00052; Metabolism; Carbohydrate metabolism; Galactose metabolism | ko00500; Metabolism; Carbohydrate metabolism; Starch and sucr…	{At2g19860; KOG1369 Hexokinase G Carbohydrate transport and metabolism ;}	{GO:0016773; phosphotransferase activity, alcohol group as acceptor; molecular_function GO:0005524; ATP binding; molecular_function GO:0005975; carbohydrate metabolic process; biological_process}	{KJ417437.1; Manihot esculenta hexokinase (HXK5) mRNA, complete cds}	{PF03727:Hexokinase PF00349:Hexokinase}
[truncated: 56,076 more rows]
