# Supplementary material for: Dissection of full-length transcriptome and metabolome of Dichocarpum (Ranunculaceae): implications in evolution of specialized metabolism of Ranunculales medicinal plants
Source: PeerJ journal article supplement (doi:10.7717/peerj.12428), 2021-11-05
Supplement: Table_S7_GO_enrichment,reduce.xlsx [file Table_S7_GO_enrichment%2Creduce.xlsx]

## Sheet: HBZLvsYNMLP
Table S6 GO enrichment analysis of species pairs
GO_accession	Description	Term_type	Over_represented_pValue	Corrected_pValue	DEG_item	DEG_list	Bg_item	Bg_list	Gene_names
GO:0003824	catalytic activity	molecular_function	1.7719e-05	0.035244	11045	22033	19136	39009	transcript_HQ_YNMLP_transcript14078/f2p0/1919,transcript_HQ_HBZL_transcript1807/f3p0/3352,transcript_HQ_YNMLP_transcript12579/f3p0/2128,transcript_HQ_YNMLP_transcript12542/f2p0/2090,transcript_HQ_SCJY_transcript3320/f2p0/2725,transcript_HQ_SCEZ_transcript19654/f11p0/1218,transcript_HQ_YNLB_transcript4359/f3p0/2846,transcript_HQ_HBZL_transcript20998/f3p0/1171,transcript_HQ_SCEZ_transcript20358/f3p…
13/f2p0/1254,transcript_HQ_YNMLP_transcript12414/f15p0/2100,transcript_HQ_SCJY_transcript15679/f5p0/1261,transcript_HQ_YNLB_transcript2703/f2p0/3199,transcript_HQ_HBZL_transcript1210/f3p0/3628,transcript_HQ_HBZL_transcript15398/f5p0/1678,transcript_HQ_HBZL_transcript8999/f2p0/2142,transcript_HQ_HBZL_transcript10195/f5p0/2028,transcript_HQ_HBZL_transcript1079/f11p0/3719,transcript_HQ_SCJY_transcri…
f2p0/2375,transcript_HQ_YNMLP_transcript15861/f2p0/1718,transcript_HQ_YNMLP_transcript7925/f3p0/2586,transcript_HQ_HBZL_transcript4058/f2p0/2751,transcript_HQ_HBZL_transcript2251/f6p0/3165,transcript_HQ_YNMLP_transcript2245/f2p0/3522,transcript_HQ_HBZL_transcript1594/f4p0/3409,transcript_HQ_YNMLP_transcript3492/f6p0/3193,transcript_HQ_YNMLP_transcript5515/f2p0/2857,transcript_HQ_YNLB_transcript17…
ript4447/f2p0/2585,transcript_HQ_SCJY_transcript8788/f2p0/2099,transcript_HQ_SCEZ_transcript22142/f2p0/960,transcript_HQ_YNLB_transcript9120/f2p0/2251,transcript_HQ_YNMLP_transcript26924/f5p0/488,transcript_HQ_HBZL_transcript10439/f2p0/2004,transcript_HQ_HBZL_transcript21809/f2p0/1071,transcript_HQ_HBZL_transcript11102/f3p0/2012,transcript_HQ_HBZL_transcript17509/f11p0/1517,transcript_HQ_HBZL_tra…
_transcript15412/f4p0/1763,transcript_HQ_HBZL_transcript11604/f2p0/1942,transcript_HQ_SCJY_transcript12738/f5p0/1639,transcript_HQ_YNLB_transcript8218/f9p0/2337,transcript_HQ_YNMLP_transcript558/f5p0/4557,transcript_HQ_YNMLP_transcript2382/f2p0/3528,transcript_HQ_YNLB_transcript18675/f3p0/1110,transcript_HQ_SCEZ_transcript18517/f3p0/1342,transcript_HQ_HBZL_transcript5796/f3p0/2485,transcript_HQ_Y…
5,transcript_HQ_YNMLP_transcript3141/f7p0/3258,transcript_HQ_YNMLP_transcript20767/f2p0/1114,transcript_HQ_YNLB_transcript13629/f2p0/1791,transcript_HQ_HBZL_transcript5298/f2p0/2569,transcript_HQ_YNMLP_transcript2670/f2p0/3421,transcript_HQ_HBZL_transcript13684/f2p0/1761,transcript_HQ_YNMLP_transcript23275/f4p0/810,transcript_HQ_SCJY_transcript3096/f7p0/2772,transcript_HQ_YNMLP_transcript19163/f2…
anscript6129/f2p0/2582,transcript_HQ_YNLB_transcript17249/f2p0/1313,transcript_HQ_HBZL_transcript18607/f3p0/1420,transcript_HQ_SCJY_transcript4659/f10p0/2628,transcript_HQ_YNMLP_transcript11664/f2p0/2227,transcript_HQ_YNLB_transcript20522/f2p0/884,transcript_HQ_SCJY_transcript15179/f3p0/1322,transcript_HQ_SCJY_transcript2574/f2p0/2892,transcript_HQ_SCJY_transcript4514/f2p0/2553,transcript_HQ_YNML…
/771,transcript_HQ_HBZL_transcript17807/f4p0/1483,transcript_HQ_HBZL_transcript20043/f3p0/1244,transcript_HQ_YNMLP_transcript762/f7p0/4275,transcript_HQ_HBZL_transcript8821/f3p0/2138,transcript_HQ_HBZL_transcript20517/f3p0/1214,transcript_HQ_YNLB_transcript17431/f2p0/1299,transcript_HQ_HBZL_transcript8525/f76p0/2164,transcript_HQ_HBZL_transcript21874/f6p0/1050,transcript_HQ_SCJY_transcript8955/f2…
LP_transcript23983/f3p0/775,transcript_HQ_YNMLP_transcript19522/f2p0/1269,transcript_HQ_HBZL_transcript5347/f2p0/2543,transcript_HQ_SCJY_transcript9585/f3p0/1966,transcript_HQ_HBZL_transcript4052/f2p0/2721,transcript_HQ_YNMLP_transcript22453/f2p0/943,transcript_HQ_HBZL_transcript16498/f19p0/1573,transcript_HQ_HBZL_transcript270/f2p0/4827,transcript_HQ_SCEZ_transcript7223/f2p0/2258,transcript_HQ_S…
script_HQ_HBZL_transcript21158/f5p0/1133,transcript_HQ_HBZL_transcript4328/f11p0/2670,transcript_HQ_YNLB_transcript14207/f9p0/1778,transcript_HQ_HBZL_transcript21399/f2p0/1113,transcript_HQ_YNMLP_transcript24099/f3p0/793,transcript_HQ_HBZL_transcript1752/f5p0/3352,transcript_HQ_YNMLP_transcript950/f5p0/4084,transcript_HQ_YNMLP_transcript20572/f4p0/1146,transcript_HQ_YNLB_transcript13093/f4p0/1868…
CEZ_transcript18729/f3p0/1309,transcript_HQ_HBZL_transcript7766/f2p0/2248,transcript_HQ_HBZL_transcript1593/f3p0/3413,transcript_HQ_HBZL_transcript19371/f2p0/1356,transcript_HQ_YNLB_transcript7535/f29p0/2402,transcript_HQ_YNMLP_transcript1113/f2p0/3996,transcript_HQ_YNLB_transcript2533/f2p0/3243,transcript_HQ_HBZL_transcript4/f2p0/8234,transcript_HQ_YNMLP_transcript12685/f2p0/2115,transcript_HQ_Y…
anscript16549/f2p0/1642,transcript_HQ_YNMLP_transcript22338/f2p0/940,transcript_HQ_HBZL_transcript8685/f2p0/2015,transcript_HQ_HBZL_transcript20459/f2p0/1201,transcript_HQ_YNLB_transcript17245/f4p0/1265,transcript_HQ_HBZL_transcript5053/f24p0/2513,transcript_HQ_YNMLP_transcript10141/f6p0/2361,transcript_HQ_HBZL_transcript12425/f2p0/1851,transcript_HQ_SCJY_transcript10625/f3p0/1865,transcript_HQ_H…
ipt_HQ_HBZL_transcript13732/f5p0/1785,transcript_HQ_HBZL_transcript10998/f12p0/1946,transcript_HQ_HBZL_transcript21415/f3p0/1099,transcript_HQ_YNLB_transcript13665/f3p0/1785,transcript_HQ_HBZL_transcript4437/f2p0/2669,transcript_HQ_YNMLP_transcript16080/f5p0/1679,transcript_HQ_SCJY_transcript352/f2p0/3940,transcript_HQ_YNLB_transcript21915/f2p0/739,transcript_HQ_SCEZ_transcript18277/f2p0/1362,tra…
f3p0/2113,transcript_HQ_SCJY_transcript4004/f3p0/2641,transcript_HQ_YNMLP_transcript15479/f2p0/1746,transcript_HQ_HBZL_transcript21776/f4p0/1071,transcript_HQ_YNLB_transcript8447/f2p0/2347,transcript_HQ_HBZL_transcript14954/f7p0/1686,transcript_HQ_YNMLP_transcript1471/f5p0/3810,transcript_HQ_HBZL_transcript11022/f22p0/1949,transcript_HQ_HBZL_transcript15227/f2p0/1660,transcript_HQ_HBZL_transcript…
t20547/f4p0/882,transcript_HQ_YNLB_transcript13405/f7p0/1803,transcript_HQ_HBZL_transcript19632/f2p0/1304,transcript_HQ_HBZL_transcript3712/f7p0/2800,transcript_HQ_HBZL_transcript717/f3p0/3998,transcript_HQ_HBZL_transcript9139/f3p0/2145,transcript_HQ_HBZL_transcript3454/f2p0/2849,transcript_HQ_YNLB_transcript12568/f4p0/1885,transcript_HQ_HBZL_transcript9196/f4p0/2110,transcript_HQ_HBZL_transcript…
49/f2p0/3800,transcript_HQ_HBZL_transcript18301/f2p0/1416,transcript_HQ_HBZL_transcript20732/f5p0/1178,transcript_HQ_HBZL_transcript18299/f6p0/1424,transcript_HQ_SCJY_transcript5326/f4p0/2445,transcript_HQ_SCJY_transcript3678/f11p0/2699,transcript_HQ_YNLB_transcript14263/f2p0/1707,transcript_HQ_YNLB_transcript2290/f2p0/3342,transcript_HQ_YNLB_transcript19765/f2p0/995,transcript_HQ_YNMLP_transcrip…
GO:0016854	racemase and epimerase activity	molecular_function	2.5453e-05	0.035244	34	22033	39	39009	transcript_HQ_YNLB_transcript15760/f2p0/1543,transcript_HQ_HBZL_transcript21379/f2p0/1083,transcript_HQ_YNMLP_transcript19750/f6p0/1237,transcript_HQ_YNMLP_transcript18574/f3p0/1374,transcript_HQ_YNLB_transcript18535/f2p0/1159,transcript_HQ_YNMLP_transcript22530/f2p0/933,transcript_HQ_YNMLP_transcript21149/f2p0/1068,transcript_HQ_HBZL_transcript21269/f2p0/1103,transcript_HQ_YNMLP_transcript19506/…
GO:0016798	hydrolase activity, acting on glycosyl bonds	molecular_function	3.6273e-05	0.035244	495	22033	778	39009	transcript_HQ_SCJY_transcript6190/f2p0/2351,transcript_HQ_YNLB_transcript14322/f3p0/1720,transcript_HQ_HBZL_transcript18907/f13p0/1357,transcript_HQ_HBZL_transcript14300/f2p0/1726,transcript_HQ_YNMLP_transcript13937/f3p0/1931,transcript_HQ_YNMLP_transcript11888/f3p0/2168,transcript_HQ_YNLB_transcript9896/f2p0/2171,transcript_HQ_YNMLP_transcript10026/f2p0/2364,transcript_HQ_SCJY_transcript3845/f3p…
GO:0004553	hydrolase activity, hydrolyzing O-glycosyl compounds	molecular_function	4.2564e-05	0.035244	480	22033	754	39009	transcript_HQ_YNLB_transcript13609/f4p0/1781,transcript_HQ_HBZL_transcript19412/f15p0/1285,transcript_HQ_YNLB_transcript13672/f3p0/1765,transcript_HQ_YNMLP_transcript14183/f3p0/1875,transcript_HQ_YNMLP_transcript13464/f2p0/1982,transcript_HQ_SCEZ_transcript7401/f3p0/2239,transcript_HQ_HBZL_transcript16862/f2p0/1543,transcript_HQ_HBZL_transcript2183/f3p0/3186,transcript_HQ_YNMLP_transcript10455/f3…
GO:0006040	amino sugar metabolic process	biological_process	4.3749e-05	0.035244	55	22033	70	39009	transcript_HQ_HBZL_transcript19750/f2p0/1276,transcript_HQ_HBZL_transcript15568/f2p0/1632,transcript_HQ_YNLB_transcript14322/f3p0/1720,transcript_HQ_HBZL_transcript22158/f6p0/1019,transcript_HQ_YNMLP_transcript20502/f7p0/1144,transcript_HQ_YNLB_transcript15878/f7p0/1571,transcript_HQ_HBZL_transcript19735/f2p0/1274,transcript_HQ_SCJY_transcript16121/f11p0/1173,transcript_HQ_HBZL_transcript21309/f3…
GO:0006050	mannosamine metabolic process	biological_process	8.3414e-05	0.040521	23	22033	25	39009	transcript_HQ_YNMLP_transcript19506/f3p0/1259,transcript_HQ_YNLB_transcript19261/f2p0/1040,transcript_HQ_YNMLP_transcript18870/f2p0/1338,transcript_HQ_HBZL_transcript20289/f7p0/1217,transcript_HQ_YNLB_transcript17794/f2p0/1242,transcript_HQ_SCJY_transcript15239/f2p0/1306,transcript_HQ_HBZL_transcript22074/f2p0/1033,transcript_HQ_HBZL_transcript18841/f2p0/1371,transcript_HQ_HBZL_transcript17169/f9…
GO:0006051	N-acetylmannosamine metabolic process	biological_process	8.3414e-05	0.040521	23	22033	25	39009	transcript_HQ_HBZL_transcript19661/f5p0/1313,transcript_HQ_YNLB_transcript18748/f10p0/1132,transcript_HQ_HBZL_transcript17169/f9p0/1518,transcript_HQ_HBZL_transcript20005/f2p0/1254,transcript_HQ_YNLB_transcript16042/f2p0/1504,transcript_HQ_SCJY_transcript18482/f3p0/930,transcript_HQ_HBZL_transcript22074/f2p0/1033,transcript_HQ_YNLB_transcript17794/f2p0/1242,transcript_HQ_SCJY_transcript15239/f2p0…
GO:0047465	N-acylglucosamine-6-phosphate 2-epimerase activity	molecular_function	8.3414e-05	0.040521	23	22033	25	39009	transcript_HQ_YNMLP_transcript19750/f6p0/1237,transcript_HQ_SCJY_transcript15203/f4p0/1334,transcript_HQ_YNLB_transcript15760/f2p0/1543,transcript_HQ_YNLB_transcript17848/f4p0/1231,transcript_HQ_YNLB_transcript18535/f2p0/1159,transcript_HQ_YNMLP_transcript21149/f2p0/1068,transcript_HQ_HBZL_transcript19750/f2p0/1276,transcript_HQ_HBZL_transcript15568/f2p0/1632,transcript_HQ_YNMLP_transcript18574/f…
GO:0016491	oxidoreductase activity	molecular_function	9.0539e-05	0.040521	2259	22033	3823	39009	transcript_HQ_SCJY_transcript8669/f5p0/2034,transcript_HQ_HBZL_transcript1242/f10p0/3594,transcript_HQ_HBZL_transcript22691/f5p0/972,transcript_HQ_HBZL_transcript14341/f15p0/1691,transcript_HQ_HBZL_transcript21622/f2p0/1097,transcript_HQ_SCJY_transcript13698/f2p0/1544,transcript_HQ_YNMLP_transcript18337/f3p0/1403,transcript_HQ_YNLB_transcript11915/f2p0/1947,transcript_HQ_YNLB_transcript7171/f3p0/…
15345/f2p0/1585,transcript_HQ_HBZL_transcript12816/f15p0/1810,transcript_HQ_HBZL_transcript13993/f2p0/1751,transcript_HQ_HBZL_transcript16749/f2p0/1565,transcript_HQ_YNLB_transcript11870/f7p0/1943,transcript_HQ_YNLB_transcript9660/f2p0/2191,transcript_HQ_YNMLP_transcript14660/f10p0/1876,transcript_HQ_YNLB_transcript12247/f4p0/1931,transcript_HQ_SCJY_transcript4140/f72p0/2544,transcript_HQ_SCJY_tr…
L_transcript11248/f2p0/1935,transcript_HQ_YNLB_transcript18241/f2p0/1202,transcript_HQ_HBZL_transcript17617/f3p0/1488,transcript_HQ_HBZL_transcript4639/f5p0/2630,transcript_HQ_HBZL_transcript1120/f2p0/3677,transcript_HQ_HBZL_transcript15924/f11p0/1612,transcript_HQ_SCJY_transcript13967/f10p0/1474,transcript_HQ_HBZL_transcript13975/f3p0/1748,transcript_HQ_HBZL_transcript12055/f2p0/1881,transcript_…
cript20453/f2p0/1207,transcript_HQ_YNMLP_transcript20717/f2p0/1135,transcript_HQ_HBZL_transcript13795/f5p0/1755,transcript_HQ_YNLB_transcript6349/f2p0/2560,transcript_HQ_HBZL_transcript19279/f5p0/1320,transcript_HQ_HBZL_transcript16060/f5p0/1623,transcript_HQ_YNLB_transcript13918/f2p0/1776,transcript_HQ_HBZL_transcript18772/f2p0/1380,transcript_HQ_HBZL_transcript2809/f3p0/3007,transcript_HQ_YNMLP…
GO:0016857	racemase and epimerase activity, acting on carbohydrates and derivatives	molecular_function	0.000119	0.047935	28	22033	32	39009	transcript_HQ_YNLB_transcript17848/f4p0/1231,transcript_HQ_YNLB_transcript15760/f2p0/1543,transcript_HQ_SCJY_transcript15203/f4p0/1334,transcript_HQ_HBZL_transcript18556/f2p0/1424,transcript_HQ_YNMLP_transcript19750/f6p0/1237,transcript_HQ_YNMLP_transcript18574/f3p0/1374,transcript_HQ_HBZL_transcript19750/f2p0/1276,transcript_HQ_YNMLP_transcript21149/f2p0/1068,transcript_HQ_HBZL_transcript21269/f…
GO:0006629	lipid metabolic process	biological_process	0.00031569	0.1156	776	22033	1268	39009	transcript_HQ_YNLB_transcript12783/f5p0/1936,transcript_HQ_HBZL_transcript18430/f2p0/1419,transcript_HQ_SCEZ_transcript19186/f2p0/1286,transcript_HQ_YNLB_transcript23/f2p0/7448,transcript_HQ_YNLB_transcript17129/f3p0/1315,transcript_HQ_HBZL_transcript8669/f4p0/2165,transcript_HQ_HBZL_transcript2305/f2p0/3166,transcript_HQ_HBZL_transcript13169/f9p0/1811,transcript_HQ_HBZL_transcript9857/f2p0/2046,…
t9611/f3p0/2193,transcript_HQ_HBZL_transcript9590/f3p0/2107,transcript_HQ_HBZL_transcript4081/f2p0/2721,transcript_HQ_HBZL_transcript21347/f24p0/1071,transcript_HQ_HBZL_transcript7626/f3p0/2275,transcript_HQ_YNLB_transcript8149/f2p0/2354,transcript_HQ_YNMLP_transcript8901/f4p0/2473,transcript_HQ_SCEZ_transcript10685/f3p0/1945,transcript_HQ_YNMLP_transcript11107/f10p0/2271,transcript_HQ_YNMLP_tran…
GO:0005509	calcium ion binding	molecular_function	0.000384	0.1289	477	22033	768	39009	transcript_HQ_YNMLP_transcript21687/f2p0/1009,transcript_HQ_HBZL_transcript22036/f5p0/1031,transcript_HQ_HBZL_transcript15590/f2p0/1664,transcript_HQ_YNLB_transcript22219/f4p0/707,transcript_HQ_HBZL_transcript391/f2p0/4464,transcript_HQ_HBZL_transcript24390/f4p0/797,transcript_HQ_YNLB_transcript21971/f2p0/728,transcript_HQ_YNMLP_transcript20639/f2p0/1132,transcript_HQ_HBZL_transcript8115/f2p0/225…
GO:0055114	oxidation-reduction process	biological_process	0.00052067	0.16133	2206	22033	3748	39009	transcript_HQ_YNLB_transcript17794/f2p0/1242,transcript_HQ_YNLB_transcript15528/f3p0/1590,transcript_HQ_YNMLP_transcript18870/f2p0/1338,transcript_HQ_SCJY_transcript9781/f4p0/1975,transcript_HQ_HBZL_transcript13319/f5p0/1792,transcript_HQ_HBZL_transcript22391/f2p0/1001,transcript_HQ_YNLB_transcript12884/f9p0/1854,transcript_HQ_YNLB_transcript8627/f2p0/2285,transcript_HQ_SCJY_transcript9554/f3p0/1…
ript14603/f2p0/1416,transcript_HQ_SCEZ_transcript1362/f2p0/3432,transcript_HQ_YNMLP_transcript20953/f2p0/1095,transcript_HQ_SCJY_transcript21797/f6p0/615,transcript_HQ_HBZL_transcript11550/f3p0/1935,transcript_HQ_HBZL_transcript18770/f4p0/1321,transcript_HQ_YNLB_transcript18393/f2p0/1158,transcript_HQ_YNLB_transcript15736/f11p0/1548,transcript_HQ_HBZL_transcript23863/f2p0/829,transcript_HQ_YNMLP_…
0106/f2p0/2152,transcript_HQ_HBZL_transcript15933/f2p0/1614,transcript_HQ_HBZL_transcript9002/f4p0/2123,transcript_HQ_HBZL_transcript1464/f3p0/3488,transcript_HQ_YNLB_transcript16858/f8p0/1383,transcript_HQ_HBZL_transcript8685/f2p0/2015,transcript_HQ_HBZL_transcript10131/f3p0/1986,transcript_HQ_YNLB_transcript12792/f2p0/1865,transcript_HQ_YNLB_transcript15425/f2p0/1579,transcript_HQ_SCEZ_transcri…
904,transcript_HQ_YNLB_transcript15877/f7p0/1538,transcript_HQ_YNLB_transcript17147/f6p0/1365,transcript_HQ_HBZL_transcript23119/f2p0/872,transcript_HQ_YNMLP_transcript16110/f2p0/1707,transcript_HQ_YNMLP_transcript2395/f2p0/3515,transcript_HQ_YNLB_transcript5644/f2p0/2663,transcript_HQ_YNLB_transcript17176/f3p0/1325,transcript_HQ_YNMLP_transcript9733/f4p0/2387,transcript_HQ_SCJY_transcript3623/f2…
GO:0004425	indole-3-glycerol-phosphate synthase activity	molecular_function	0.00060848	0.17507	22	22033	25	39009	transcript_HQ_SCJY_transcript18482/f3p0/930,transcript_HQ_HBZL_transcript20005/f2p0/1254,transcript_HQ_YNLB_transcript16042/f2p0/1504,transcript_HQ_YNLB_transcript18748/f10p0/1132,transcript_HQ_HBZL_transcript17169/f9p0/1518,transcript_HQ_HBZL_transcript19661/f5p0/1313,transcript_HQ_HBZL_transcript18841/f2p0/1371,transcript_HQ_YNMLP_transcript19506/f3p0/1259,transcript_HQ_YNLB_transcript19261/f2p…
GO:0004834	tryptophan synthase activity	molecular_function	0.0016043	0.32273	11	22033	11	39009	transcript_HQ_HBZL_transcript18841/f2p0/1371,transcript_HQ_YNLB_transcript15760/f2p0/1543,transcript_HQ_SCJY_transcript18482/f3p0/930,transcript_HQ_YNMLP_transcript21149/f2p0/1068,transcript_HQ_HBZL_transcript15568/f2p0/1632,transcript_HQ_HBZL_transcript20005/f2p0/1254,transcript_HQ_YNLB_transcript18535/f2p0/1159,transcript_HQ_YNLB_transcript16042/f2p0/1504,transcript_HQ_SCJY_transcript13525/f2p0…
GO:0015908	fatty acid transport	biological_process	0.0018428	0.32273	14	22033	15	39009	transcript_HQ_HBZL_transcript15610/f2p0/1637,transcript_HQ_YNMLP_transcript13073/f2p0/2024,transcript_HQ_HBZL_transcript19061/f9p0/1347,transcript_HQ_YNMLP_transcript19989/f6p0/1214,transcript_HQ_YNMLP_transcript20273/f5p0/1185,transcript_HQ_YNLB_transcript19521/f2p0/1012,transcript_HQ_HBZL_transcript24418/f41p0/713,transcript_HQ_HBZL_transcript18490/f2p0/1408,transcript_HQ_HBZL_transcript18945/f…
GO:0015909	long-chain fatty acid transport	biological_process	0.0018428	0.32273	14	22033	15	39009	transcript_HQ_YNMLP_transcript20273/f5p0/1185,transcript_HQ_YNMLP_transcript19989/f6p0/1214,transcript_HQ_YNMLP_transcript13073/f2p0/2024,transcript_HQ_HBZL_transcript19061/f9p0/1347,transcript_HQ_HBZL_transcript15610/f2p0/1637,transcript_HQ_YNLB_transcript19521/f2p0/1012,transcript_HQ_HBZL_transcript18490/f2p0/1408,transcript_HQ_HBZL_transcript24418/f41p0/713,transcript_HQ_HBZL_transcript18945/f…
GO:0032309	icosanoid secretion	biological_process	0.0018428	0.32273	14	22033	15	39009	transcript_HQ_YNMLP_transcript13073/f2p0/2024,transcript_HQ_HBZL_transcript15610/f2p0/1637,transcript_HQ_HBZL_transcript19061/f9p0/1347,transcript_HQ_YNMLP_transcript20273/f5p0/1185,transcript_HQ_YNMLP_transcript19989/f6p0/1214,transcript_HQ_YNLB_transcript19521/f2p0/1012,transcript_HQ_HBZL_transcript24418/f41p0/713,transcript_HQ_HBZL_transcript18490/f2p0/1408,transcript_HQ_HBZL_transcript18945/f…
GO:0046717	acid secretion	biological_process	0.0018428	0.32273	14	22033	15	39009	transcript_HQ_YNMLP_transcript13073/f2p0/2024,transcript_HQ_HBZL_transcript15610/f2p0/1637,transcript_HQ_HBZL_transcript19061/f9p0/1347,transcript_HQ_YNMLP_transcript19989/f6p0/1214,transcript_HQ_YNMLP_transcript20273/f5p0/1185,transcript_HQ_YNLB_transcript19521/f2p0/1012,transcript_HQ_HBZL_transcript24418/f41p0/713,transcript_HQ_HBZL_transcript18490/f2p0/1408,transcript_HQ_HBZL_transcript18945/f…
GO:0050482	arachidonic acid secretion	biological_process	0.0018428	0.32273	14	22033	15	39009	transcript_HQ_YNLB_transcript17487/f2p0/1280,transcript_HQ_YNMLP_transcript24923/f5p0/759,transcript_HQ_HBZL_transcript15189/f3p0/1664,transcript_HQ_YNLB_transcript19294/f2p0/1051,transcript_HQ_HBZL_transcript19715/f2p0/1285,transcript_HQ_HBZL_transcript18490/f2p0/1408,transcript_HQ_HBZL_transcript24418/f41p0/713,transcript_HQ_HBZL_transcript18945/f3p0/1385,transcript_HQ_YNMLP_transcript20273/f5p…
GO:0071715	icosanoid transport	biological_process	0.0018428	0.32273	14	22033	15	39009	transcript_HQ_YNLB_transcript17487/f2p0/1280,transcript_HQ_YNMLP_transcript24923/f5p0/759,transcript_HQ_HBZL_transcript19715/f2p0/1285,transcript_HQ_YNLB_transcript19294/f2p0/1051,transcript_HQ_HBZL_transcript15189/f3p0/1664,transcript_HQ_HBZL_transcript24418/f41p0/713,transcript_HQ_HBZL_transcript18490/f2p0/1408,transcript_HQ_HBZL_transcript18945/f3p0/1385,transcript_HQ_YNMLP_transcript13073/f2p…
GO:1901571	fatty acid derivative transport	biological_process	0.0018428	0.32273	14	22033	15	39009	transcript_HQ_HBZL_transcript19715/f2p0/1285,transcript_HQ_YNLB_transcript19294/f2p0/1051,transcript_HQ_HBZL_transcript15189/f3p0/1664,transcript_HQ_YNMLP_transcript24923/f5p0/759,transcript_HQ_YNLB_transcript17487/f2p0/1280,transcript_HQ_YNLB_transcript19521/f2p0/1012,transcript_HQ_YNMLP_transcript13073/f2p0/2024,transcript_HQ_HBZL_transcript15610/f2p0/1637,transcript_HQ_HBZL_transcript19061/f9p…
GO:1903963	arachidonate transport	biological_process	0.0018428	0.32273	14	22033	15	39009	transcript_HQ_YNLB_transcript17487/f2p0/1280,transcript_HQ_YNMLP_transcript24923/f5p0/759,transcript_HQ_HBZL_transcript19715/f2p0/1285,transcript_HQ_HBZL_transcript15189/f3p0/1664,transcript_HQ_YNLB_transcript19294/f2p0/1051,transcript_HQ_HBZL_transcript24418/f41p0/713,transcript_HQ_HBZL_transcript18490/f2p0/1408,transcript_HQ_HBZL_transcript18945/f3p0/1385,transcript_HQ_HBZL_transcript15610/f2p0…
GO:0044710	single-organism metabolic process	biological_process	0.0019688	0.33043	4396	22033	7576	39009	transcript_HQ_YNLB_transcript14392/f3p0/1698,transcript_HQ_HBZL_transcript18811/f2p0/1367,transcript_HQ_YNLB_transcript3083/f4p0/3085,transcript_HQ_YNMLP_transcript9689/f2p0/2398,transcript_HQ_HBZL_transcript13839/f2p0/1758,transcript_HQ_SCEZ_transcript22317/f2p0/944,transcript_HQ_HBZL_transcript18384/f3p0/1394,transcript_HQ_YNLB_transcript8564/f7p0/2214,transcript_HQ_YNMLP_transcript17615/f5p0/1…
pt2577/f4p0/3244,transcript_HQ_YNMLP_transcript5659/f3p0/2834,transcript_HQ_HBZL_transcript13652/f3p0/1768,transcript_HQ_SCJY_transcript7100/f13p0/2239,transcript_HQ_YNLB_transcript10389/f2p0/2111,transcript_HQ_SCJY_transcript15268/f2p0/1290,transcript_HQ_YNMLP_transcript15055/f2p0/1821,transcript_HQ_HBZL_transcript2358/f2p0/3156,transcript_HQ_YNLB_transcript15974/f4p0/1522,transcript_HQ_HBZL_tra…
script_HQ_YNLB_transcript1446/f2p0/3699,transcript_HQ_HBZL_transcript17953/f6p0/1435,transcript_HQ_YNMLP_transcript15617/f2p0/1735,transcript_HQ_SCJY_transcript11388/f2p0/1787,transcript_HQ_YNMLP_transcript20717/f2p0/1135,transcript_HQ_HBZL_transcript20453/f2p0/1207,transcript_HQ_HBZL_transcript13795/f5p0/1755,transcript_HQ_HBZL_transcript19279/f5p0/1320,transcript_HQ_HBZL_transcript18772/f2p0/13…
cript_HQ_YNMLP_transcript2746/f2p0/3383,transcript_HQ_YNMLP_transcript3774/f4p0/3143,transcript_HQ_YNMLP_transcript8242/f4p0/2546,transcript_HQ_SCJY_transcript13760/f2p0/1519,transcript_HQ_YNLB_transcript17503/f5p0/1303,transcript_HQ_YNMLP_transcript18941/f2p0/1336,transcript_HQ_HBZL_transcript20323/f5p0/1216,transcript_HQ_HBZL_transcript4151/f2p0/2717,transcript_HQ_HBZL_transcript1984/f13p0/3255…
_YNMLP_transcript6467/f9p0/2690,transcript_HQ_YNLB_transcript21130/f9p0/839,transcript_HQ_SCEZ_transcript117/f2p0/5758,transcript_HQ_HBZL_transcript16165/f2p0/1606,transcript_HQ_SCEZ_transcript4016/f2p0/2682,transcript_HQ_YNLB_transcript2024/f2p0/3428,transcript_HQ_YNMLP_transcript1483/f3p0/3807,transcript_HQ_HBZL_transcript21226/f2p0/1134,transcript_HQ_SCJY_transcript483/f2p0/3785,transcript_HQ_…
0/978,transcript_HQ_SCJY_transcript18128/f2p0/945,transcript_HQ_YNLB_transcript6349/f2p0/2560,transcript_HQ_HBZL_transcript15721/f4p0/1611,transcript_HQ_HBZL_transcript16060/f5p0/1623,transcript_HQ_YNLB_transcript13918/f2p0/1776,transcript_HQ_HBZL_transcript2809/f3p0/3007,transcript_HQ_SCJY_transcript16689/f2p0/1152,transcript_HQ_SCJY_transcript4468/f4p0/2573,transcript_HQ_YNMLP_transcript9245/f2…
script21204/f2p0/1062,transcript_HQ_YNLB_transcript14092/f3p0/1724,transcript_HQ_YNMLP_transcript6892/f2p0/2691,transcript_HQ_HBZL_transcript868/f8p0/3894,transcript_HQ_HBZL_transcript12900/f2p0/1821,transcript_HQ_HBZL_transcript16193/f8p0/1598,transcript_HQ_HBZL_transcript12646/f3p0/1862,transcript_HQ_HBZL_transcript8357/f2p0/2159
GO:0016701	oxidoreductase activity, acting on single donors with incorporation of molecular oxygen	molecular_function	0.0022886	0.36875	145	22033	219	39009	transcript_HQ_HBZL_transcript10306/f4p0/2018,transcript_HQ_YNLB_transcript4267/f2p0/2861,transcript_HQ_HBZL_transcript10386/f4p0/2007,transcript_HQ_HBZL_transcript3842/f3p0/2776,transcript_HQ_YNLB_transcript13899/f2p0/1765,transcript_HQ_SCJY_transcript5572/f2p0/2444,transcript_HQ_SCJY_transcript2372/f7p0/2919,transcript_HQ_YNMLP_transcript6392/f4p0/2772,transcript_HQ_SCJY_transcript2227/f4p0/2966…
GO:0016310	phosphorylation	biological_process	0.0027491	0.4259	1842	22033	3101	39009	transcript_HQ_YNLB_transcript3829/f4p0/2932,transcript_HQ_HBZL_transcript10753/f3p0/2021,transcript_HQ_SCJY_transcript8611/f4p0/2058,transcript_HQ_YNLB_transcript1436/f3p0/3694,transcript_HQ_YNMLP_transcript191/f4p0/5635,transcript_HQ_YNLB_transcript10572/f2p0/2105,transcript_HQ_YNMLP_transcript6090/f2p0/2826,transcript_HQ_YNMLP_transcript3444/f3p0/3278,transcript_HQ_YNMLP_transcript4420/f2p0/303…
/1893,transcript_HQ_YNLB_transcript12150/f3p0/1933,transcript_HQ_SCJY_transcript1278/f2p0/3260,transcript_HQ_HBZL_transcript5489/f6p0/2569,transcript_HQ_SCJY_transcript2792/f2p0/2825,transcript_HQ_SCEZ_transcript15358/f5p0/1625,transcript_HQ_YNLB_transcript15056/f2p0/1639,transcript_HQ_HBZL_transcript3485/f6p0/2870,transcript_HQ_HBZL_transcript11305/f3p0/1941,transcript_HQ_YNMLP_transcript14653/f…
f2p0/2804,transcript_HQ_YNLB_transcript5383/f3p0/2677,transcript_HQ_HBZL_transcript1785/f2p0/3365,transcript_HQ_HBZL_transcript1430/f3p0/3536,transcript_HQ_HBZL_transcript16549/f2p0/1642,transcript_HQ_HBZL_transcript9510/f3p0/2101,transcript_HQ_SCJY_transcript6234/f2p0/2349,transcript_HQ_YNMLP_transcript9836/f7p0/2400,transcript_HQ_YNMLP_transcript4004/f2p0/3104,transcript_HQ_YNLB_transcript973/f…
GO:0008037	cell recognition	biological_process	0.0030393	0.45342	75	22033	106	39009	transcript_HQ_YNMLP_transcript3880/f4p0/3110,transcript_HQ_YNMLP_transcript3516/f2p0/3188,transcript_HQ_SCEZ_transcript4525/f3p0/2637,transcript_HQ_YNLB_transcript4548/f2p0/2791,transcript_HQ_HBZL_transcript4100/f2p0/2723,transcript_HQ_YNMLP_transcript19750/f6p0/1237,transcript_HQ_YNMLP_transcript7767/f2p0/2585,transcript_HQ_YNMLP_transcript4720/f2p0/3026,transcript_HQ_SCJY_transcript4017/f3p0/26…
GO:0052689	carboxylic ester hydrolase activity	molecular_function	0.0038674	0.55635	111	22033	166	39009	transcript_HQ_HBZL_transcript8330/f3p0/2191,transcript_HQ_YNLB_transcript12139/f6p0/1944,transcript_HQ_HBZL_transcript2013/f4p0/3263,transcript_HQ_YNLB_transcript17110/f4p0/1297,transcript_HQ_SCJY_transcript11213/f2p0/1809,transcript_HQ_HBZL_transcript19147/f9p0/1364,transcript_HQ_HBZL_transcript9745/f7p0/2049,transcript_HQ_YNMLP_transcript1955/f2p0/3622,transcript_HQ_HBZL_transcript20517/f3p0/12…
GO:0050662	coenzyme binding	molecular_function	0.0040631	0.56435	766	22033	1277	39009	transcript_HQ_YNMLP_transcript19742/f2p0/1250,transcript_HQ_YNMLP_transcript18676/f2p0/1369,transcript_HQ_HBZL_transcript22440/f3p0/990,transcript_HQ_YNMLP_transcript20489/f2p0/1211,transcript_HQ_YNLB_transcript12576/f45p0/1843,transcript_HQ_YNLB_transcript18573/f2p0/1130,transcript_HQ_YNMLP_transcript19357/f3p0/1296,transcript_HQ_HBZL_transcript14832/f9p0/1688,transcript_HQ_YNLB_transcript16912/…
pt_HQ_YNLB_transcript8499/f3p0/2318,transcript_HQ_HBZL_transcript345/f7p0/4556,transcript_HQ_HBZL_transcript13169/f9p0/1811,transcript_HQ_YNMLP_transcript10693/f2p0/2297,transcript_HQ_HBZL_transcript12882/f3p0/1851,transcript_HQ_SCEZ_transcript19186/f2p0/1286,transcript_HQ_SCJY_transcript9031/f2p0/2047,transcript_HQ_HBZL_transcript16944/f2p0/1541,transcript_HQ_HBZL_transcript8669/f4p0/2165,transc…
GO:0044699	single-organism process	biological_process	0.0043197	0.58	7851	22033	13674	39009	transcript_HQ_HBZL_transcript4202/f2p0/2692,transcript_HQ_HBZL_transcript5359/f2p0/2532,transcript_LQ_YNMLP_transcript19823/f2p0/1238,transcript_HQ_YNMLP_transcript1432/f56p0/3806,transcript_HQ_HBZL_transcript21453/f2p0/1138,transcript_HQ_YNLB_transcript16384/f2p0/1446,transcript_HQ_YNLB_transcript5773/f2p0/2632,transcript_HQ_HBZL_transcript11979/f4p0/1906,transcript_HQ_HBZL_transcript954/f2p0/38…
56/f2p0/2105,transcript_HQ_HBZL_transcript21423/f8p0/1101,transcript_HQ_YNMLP_transcript28202/f2p0/331,transcript_HQ_HBZL_transcript20959/f6p0/1150,transcript_HQ_YNMLP_transcript4235/f3p0/3070,transcript_HQ_SCJY_transcript4066/f18p0/2605,transcript_HQ_HBZL_transcript21662/f7p0/1077,transcript_HQ_SCJY_transcript11742/f3p0/1747,transcript_HQ_HBZL_transcript13366/f5p0/1800,transcript_HQ_YNMLP_transc…
Y_transcript15152/f2p0/1326,transcript_HQ_HBZL_transcript15395/f2p0/1652,transcript_HQ_SCJY_transcript12180/f10p0/1730,transcript_HQ_YNLB_transcript15270/f4p0/1596,transcript_HQ_SCJY_transcript11294/f2p0/1825,transcript_HQ_YNMLP_transcript25689/f2p0/615,transcript_HQ_YNMLP_transcript17709/f7p0/1520,transcript_HQ_SCEZ_transcript6310/f18p0/2348,transcript_HQ_YNMLP_transcript5595/f4p0/2862,transcrip…
18524/f2p0/1392,transcript_HQ_YNMLP_transcript4937/f6p0/2934,transcript_HQ_YNLB_transcript20385/f12p0/834,transcript_HQ_YNLB_transcript10247/f2p0/2113,transcript_HQ_HBZL_transcript8044/f3p0/2210,transcript_HQ_HBZL_transcript9876/f2p0/2042,transcript_HQ_HBZL_transcript3031/f2p0/3096,transcript_HQ_SCEZ_transcript20178/f3p0/1189,transcript_HQ_YNMLP_transcript14378/f6p0/1894,transcript_HQ_HBZL_transc…
38,transcript_HQ_YNMLP_transcript101/f3p0/6300,transcript_HQ_YNMLP_transcript7701/f4p0/2617,transcript_HQ_HBZL_transcript15692/f3p0/1630,transcript_HQ_YNLB_transcript5835/f2p0/2606,transcript_HQ_HBZL_transcript13169/f9p0/1811,transcript_HQ_HBZL_transcript10383/f4p0/2042,transcript_HQ_YNLB_transcript19593/f5p0/1012,transcript_HQ_SCJY_transcript9019/f2p0/2038,transcript_HQ_YNLB_transcript12168/f2p0…
P_transcript15864/f5p0/1710,transcript_HQ_YNLB_transcript14194/f2p0/1746,transcript_HQ_YNMLP_transcript18907/f5p0/1331,transcript_HQ_YNMLP_transcript3983/f2p0/3149,transcript_HQ_HBZL_transcript2013/f4p0/3263,transcript_HQ_HBZL_transcript8848/f5p0/2148,transcript_HQ_YNMLP_transcript7704/f2p0/2707,transcript_HQ_HBZL_transcript9889/f4p0/2074,transcript_HQ_HBZL_transcript16724/f26p0/1540,transcript_H…
6797/f6p0/2352,transcript_HQ_YNMLP_transcript21526/f9p0/1051,transcript_HQ_HBZL_transcript14903/f4p0/1691,transcript_HQ_YNLB_transcript7669/f5p0/2475,transcript_HQ_YNMLP_transcript11934/f3p0/2188,transcript_HQ_YNMLP_transcript467/f3p0/4810,transcript_HQ_HBZL_transcript21105/f2p0/1140,transcript_HQ_YNMLP_transcript4781/f3p0/2982,transcript_HQ_SCJY_transcript3789/f2p0/2640,transcript_HQ_YNLB_transc…
0/3515,transcript_HQ_SCEZ_transcript16220/f2p0/1544,transcript_HQ_HBZL_transcript22865/f2p0/934,transcript_HQ_YNLB_transcript10235/f3p0/2142,transcript_HQ_SCJY_transcript11082/f2p0/1837,transcript_HQ_HBZL_transcript17458/f3p0/1495,transcript_HQ_YNMLP_transcript9910/f3p0/2368,transcript_HQ_HBZL_transcript532/f2p0/4188,transcript_HQ_YNMLP_transcript9289/f3p0/2478,transcript_HQ_SCJY_transcript15477/…
98/f2p0/1438,transcript_HQ_HBZL_transcript11975/f3p0/1898,transcript_HQ_SCJY_transcript16664/f3p0/1108,transcript_HQ_HBZL_transcript20302/f2p0/1232,transcript_HQ_HBZL_transcript23572/f7p0/867,transcript_HQ_HBZL_transcript192/f2p0/5060,transcript_HQ_HBZL_transcript19295/f2p0/1324,transcript_HQ_SCJY_transcript16329/f2p0/1182,transcript_HQ_YNLB_transcript13938/f8p0/1787,transcript_HQ_HBZL_transcript…
transcript5765/f3p0/2855,transcript_HQ_YNLB_transcript3011/f2p0/3150,transcript_HQ_HBZL_transcript4941/f11p0/2590,transcript_HQ_HBZL_transcript17232/f2p0/1509,transcript_HQ_YNLB_transcript23176/f2p0/599,transcript_HQ_HBZL_transcript239/f2p0/4896,transcript_HQ_SCJY_transcript11614/f2p0/1759,transcript_HQ_HBZL_transcript232/f20p0/4869,transcript_HQ_SCEZ_transcript2847/f6p0/2921,transcript_HQ_SCEZ_t…
915,transcript_HQ_YNMLP_transcript3782/f3p0/3150,transcript_HQ_YNLB_transcript22628/f2p0/655,transcript_HQ_YNMLP_transcript6251/f2p0/2771,transcript_HQ_HBZL_transcript2929/f2p0/2984,transcript_HQ_SCJY_transcript20157/f2p0/760,transcript_HQ_YNLB_transcript5606/f4p0/2679,transcript_HQ_YNMLP_transcript17175/f2p0/1572,transcript_HQ_YNLB_transcript20092/f6p0/996,transcript_HQ_YNLB_transcript16574/f2p0…
GO:0072330	monocarboxylic acid biosynthetic process	biological_process	0.0059611	0.68564	79	22033	115	39009	transcript_HQ_HBZL_transcript7126/f7p0/2312,transcript_HQ_SCEZ_transcript19/f3p0/7436,transcript_HQ_HBZL_transcript7960/f2p0/2223,transcript_HQ_HBZL_transcript12113/f4p0/1879,transcript_HQ_HBZL_transcript9590/f3p0/2107,transcript_HQ_HBZL_transcript12909/f5p0/1818,transcript_HQ_HBZL_transcript12501/f4p0/1870,transcript_HQ_HBZL_transcript11390/f22p0/1918,transcript_HQ_YNMLP_transcript15168/f2p0/179…
GO:0009856	pollination	biological_process	0.0060711	0.68564	72	22033	103	39009	transcript_HQ_HBZL_transcript3467/f6p0/2841,transcript_HQ_HBZL_transcript3227/f4p0/2895,transcript_HQ_SCJY_transcript3196/f3p0/2763,transcript_HQ_HBZL_transcript3589/f2p0/2812,transcript_HQ_HBZL_transcript4953/f2p0/2591,transcript_HQ_HBZL_transcript4751/f3p0/2597,transcript_HQ_YNMLP_transcript2387/f3p0/3472,transcript_HQ_YNMLP_transcript5397/f11p0/2883,transcript_HQ_YNMLP_transcript6874/f2p0/2772…
GO:0009875	pollen-pistil interaction	biological_process	0.0060711	0.68564	72	22033	103	39009	transcript_HQ_HBZL_transcript4273/f3p0/2650,transcript_HQ_HBZL_transcript4319/f9p0/2710,transcript_HQ_YNMLP_transcript2241/f2p0/3538,transcript_HQ_YNMLP_transcript3283/f2p0/3274,transcript_HQ_YNMLP_transcript3900/f2p0/3188,transcript_HQ_YNMLP_transcript6343/f3p0/2751,transcript_HQ_YNLB_transcript2285/f3p0/3329,transcript_HQ_HBZL_transcript14697/f3p0/1703,transcript_HQ_HBZL_transcript4670/f2p0/262…
GO:0044706	multi-multicellular organism process	biological_process	0.0060711	0.68564	72	22033	103	39009	transcript_HQ_YNLB_transcript2029/f5p0/3446,transcript_HQ_YNLB_transcript2649/f2p0/3206,transcript_HQ_HBZL_transcript3553/f3p0/2835,transcript_HQ_HBZL_transcript5468/f2p0/2526,transcript_HQ_HBZL_transcript4312/f2p0/2706,transcript_HQ_YNLB_transcript14437/f4p0/1690,transcript_HQ_HBZL_transcript16142/f2p0/1598,transcript_HQ_YNMLP_transcript6597/f2p0/2725,transcript_HQ_YNLB_transcript14104/f2p0/1727…
GO:0048544	recognition of pollen	biological_process	0.0060711	0.68564	72	22033	103	39009	transcript_HQ_HBZL_transcript3817/f2p0/2765,transcript_HQ_YNLB_transcript2575/f3p0/3236,transcript_HQ_YNLB_transcript4685/f4p0/2846,transcript_HQ_SCJY_transcript3013/f4p0/2781,transcript_HQ_YNLB_transcript4972/f3p0/2741,transcript_HQ_SCJY_transcript3486/f2p0/2706,transcript_HQ_SCJY_transcript3277/f7p0/2747,transcript_HQ_HBZL_transcript4767/f6p0/2656,transcript_HQ_HBZL_transcript3485/f6p0/2870,tra…
GO:0004312	fatty acid synthase activity	molecular_function	0.0065523	0.68564	32	22033	42	39009	transcript_HQ_HBZL_transcript7960/f2p0/2223,transcript_HQ_HBZL_transcript9590/f3p0/2107,transcript_HQ_HBZL_transcript12909/f5p0/1818,transcript_HQ_HBZL_transcript15432/f23p0/1596,transcript_HQ_HBZL_transcript12308/f6p0/1894,transcript_HQ_HBZL_transcript10016/f13p0/2063,transcript_HQ_HBZL_transcript9969/f3p0/2038,transcript_HQ_YNMLP_transcript15168/f2p0/1795,transcript_HQ_SCJY_transcript10299/f6p0…
GO:0004315	3-oxoacyl-[acyl-carrier-protein] synthase activity	molecular_function	0.0065523	0.68564	32	22033	42	39009	transcript_HQ_HBZL_transcript11490/f3p0/1933,transcript_HQ_HBZL_transcript9076/f4p0/2113,transcript_HQ_HBZL_transcript10900/f2p0/1977,transcript_HQ_SCJY_transcript10299/f6p0/1897,transcript_HQ_YNMLP_transcript14982/f2p0/1805,transcript_HQ_HBZL_transcript13181/f2p0/1809,transcript_HQ_HBZL_transcript16664/f2p0/1561,transcript_HQ_YNMLP_transcript13455/f4p0/1945,transcript_HQ_HBZL_transcript9590/f3p0…
GO:0015399	primary active transmembrane transporter activity	molecular_function	0.0069278	0.68564	134	22033	200	39009	transcript_HQ_HBZL_transcript3267/f2p0/2876,transcript_HQ_HBZL_transcript18332/f5p0/1432,transcript_HQ_YNLB_transcript18557/f3p0/1142,transcript_HQ_HBZL_transcript2983/f9p0/2957,transcript_HQ_YNMLP_transcript1809/f3p0/3763,transcript_HQ_HBZL_transcript183/f2p0/5149,transcript_HQ_YNMLP_transcript1230/f2p0/3970,transcript_HQ_HBZL_transcript2720/f3p0/3024,transcript_HQ_HBZL_transcript205/f3p0/4891,t…
GO:0015405	P-P-bond-hydrolysis-driven transmembrane transporter activity	molecular_function	0.0069278	0.68564	134	22033	200	39009	transcript_HQ_YNLB_transcript264/f3p0/5072,transcript_HQ_SCJY_transcript14902/f3p0/1386,transcript_HQ_YNMLP_transcript306/f8p0/5111,transcript_HQ_YNMLP_transcript216/f5p0/5521,transcript_HQ_YNLB_transcript687/f2p0/4243,transcript_HQ_HBZL_transcript14521/f5p0/1723,transcript_HQ_YNLB_transcript174/f2p0/5656,transcript_HQ_SCEZ_transcript2741/f2p0/2950,transcript_HQ_YNMLP_transcript1230/f2p0/3970,tra…
GO:0004623	phospholipase A2 activity	molecular_function	0.006979	0.68564	14	22033	16	39009	transcript_HQ_YNLB_transcript17487/f2p0/1280,transcript_HQ_YNMLP_transcript24923/f5p0/759,transcript_HQ_YNLB_transcript19294/f2p0/1051,transcript_HQ_HBZL_transcript15189/f3p0/1664,transcript_HQ_HBZL_transcript19715/f2p0/1285,transcript_HQ_HBZL_transcript18490/f2p0/1408,transcript_HQ_HBZL_transcript24418/f41p0/713,transcript_HQ_HBZL_transcript18945/f3p0/1385,transcript_HQ_YNMLP_transcript19989/f6p…
GO:0008610	lipid biosynthetic process	biological_process	0.0073153	0.70155	369	22033	602	39009	transcript_HQ_HBZL_transcript10998/f12p0/1946,transcript_HQ_YNLB_transcript18991/f5p0/1080,transcript_HQ_YNMLP_transcript14933/f2p0/1827,transcript_HQ_YNLB_transcript17270/f3p0/1345,transcript_HQ_HBZL_transcript16/f2p0/7482,transcript_HQ_YNLB_transcript17182/f10p0/1327,transcript_HQ_HBZL_transcript16626/f2p0/1570,transcript_HQ_HBZL_transcript20459/f2p0/1201,transcript_HQ_YNMLP_transcript16080/f5p…
GO:0009654	photosystem II oxygen evolving complex	cellular_component	0.0076573	0.70155	18	22033	22	39009	transcript_HQ_HBZL_transcript13161/f3p0/1798,transcript_HQ_YNLB_transcript23035/f2p0/619,transcript_HQ_YNMLP_transcript20146/f2p0/1144,transcript_HQ_HBZL_transcript8070/f2p0/2225,transcript_HQ_YNLB_transcript22240/f3p0/690,transcript_HQ_HBZL_transcript21841/f5p0/1072,transcript_HQ_SCJY_transcript16374/f5p0/1164,transcript_HQ_SCJY_transcript10455/f2p0/1881,transcript_HQ_HBZL_transcript26234/f3p0/5…
GO:0006633	fatty acid biosynthetic process	biological_process	0.0076634	0.70155	73	22033	106	39009	transcript_HQ_HBZL_transcript9462/f4p0/2090,transcript_HQ_HBZL_transcript5057/f2p0/2576,transcript_HQ_HBZL_transcript13181/f2p0/1809,transcript_HQ_HBZL_transcript17093/f3p0/1522,transcript_HQ_SCJY_transcript10299/f6p0/1897,transcript_HQ_HBZL_transcript2646/f5p0/3055,transcript_HQ_YNMLP_transcript2014/f2p0/3614,transcript_HQ_YNMLP_transcript20114/f2p0/1190,transcript_HQ_YNLB_transcript9548/f9p0/22…
GO:0008152	metabolic process	biological_process	0.008304	0.7433	11513	22033	20189	39009	transcript_HQ_HBZL_transcript7315/f3p0/2318,transcript_HQ_YNMLP_transcript21023/f2p0/1084,transcript_HQ_HBZL_transcript6180/f11p0/2241,transcript_HQ_SCJY_transcript1343/f2p0/3254,transcript_HQ_SCJY_transcript11213/f2p0/1809,transcript_HQ_HBZL_transcript25487/f6p0/669,transcript_HQ_HBZL_transcript12759/f2p0/1846,transcript_HQ_HBZL_transcript2817/f4p0/3001,transcript_HQ_HBZL_transcript1274/f2p0/358…
nscript14392/f3p0/1698,transcript_HQ_YNLB_transcript3083/f4p0/3085,transcript_HQ_YNLB_transcript4660/f40p0/2748,transcript_HQ_YNLB_transcript14807/f3p0/1647,transcript_HQ_HBZL_transcript16497/f10p0/1571,transcript_HQ_YNLB_transcript19062/f6p0/1028,transcript_HQ_HBZL_transcript5580/f3p0/2504,transcript_HQ_HBZL_transcript18877/f14p0/1371,transcript_HQ_SCJY_transcript10698/f4p0/1865,transcript_HQ_YN…
0/1735,transcript_HQ_HBZL_transcript27814/f12p0/401,transcript_HQ_YNLB_transcript6588/f2p0/2516,transcript_HQ_HBZL_transcript13586/f3p0/1793,transcript_HQ_YNMLP_transcript24349/f3p0/740,transcript_HQ_HBZL_transcript26777/f5p0/536,transcript_HQ_YNMLP_transcript12909/f6p0/2054,transcript_HQ_YNMLP_transcript12865/f2p0/2053,transcript_HQ_YNLB_transcript13748/f14p0/1756,transcript_HQ_YNMLP_transcript1…
p0/1801,transcript_HQ_YNMLP_transcript14383/f2p0/1892,transcript_HQ_YNMLP_transcript22696/f3p0/931,transcript_HQ_SCJY_transcript16185/f3p0/1171,transcript_HQ_HBZL_transcript11072/f3p0/1986,transcript_HQ_HBZL_transcript18940/f3p0/1364,transcript_HQ_SCEZ_transcript10998/f9p0/1915,transcript_HQ_YNMLP_transcript4227/f2p0/3052,transcript_HQ_HBZL_transcript13803/f5p0/1759,transcript_HQ_HBZL_transcript2…
cript_HQ_HBZL_transcript15054/f7p0/1681,transcript_HQ_HBZL_transcript2193/f3p0/3219,transcript_HQ_HBZL_transcript21599/f6p0/1106,transcript_HQ_SCJY_transcript13812/f12p0/1480,transcript_HQ_HBZL_transcript10300/f8p0/2033,transcript_HQ_YNMLP_transcript4167/f3p0/3056,transcript_HQ_HBZL_transcript21629/f2p0/1086,transcript_HQ_HBZL_transcript5673/f2p0/2501,transcript_HQ_YNLB_transcript19100/f4p0/1062,…
ranscript_HQ_YNMLP_transcript8936/f2p0/2487,transcript_HQ_SCJY_transcript18413/f2p0/919,transcript_HQ_YNMLP_transcript19186/f2p0/1318,transcript_HQ_HBZL_transcript7258/f5p0/2319,transcript_HQ_SCJY_transcript14399/f2p0/1419,transcript_HQ_YNLB_transcript14633/f2p0/1672,transcript_HQ_YNLB_transcript5206/f2p0/2690,transcript_HQ_YNMLP_transcript12912/f2p0/2096,transcript_HQ_YNLB_transcript8437/f2p0/23…
t_HQ_YNLB_transcript14088/f3p0/1743,transcript_HQ_YNMLP_transcript1971/f3p0/3660,transcript_HQ_HBZL_transcript3784/f3p0/2790,transcript_HQ_YNLB_transcript7521/f5p0/2427,transcript_HQ_HBZL_transcript13809/f5p0/1796,transcript_HQ_HBZL_transcript18682/f3p0/1397,transcript_HQ_HBZL_transcript24158/f2p0/800,transcript_HQ_HBZL_transcript11581/f2p0/1948,transcript_HQ_YNLB_transcript17569/f2p0/1301,transc…
HQ_HBZL_transcript9000/f35p0/1989,transcript_HQ_YNMLP_transcript20203/f4p0/1227,transcript_HQ_HBZL_transcript11818/f2p0/1893,transcript_HQ_SCJY_transcript7170/f2p0/2239,transcript_HQ_YNMLP_transcript2981/f2p0/3332,transcript_HQ_YNMLP_transcript1076/f3p0/4075,transcript_HQ_HBZL_transcript22071/f4p0/1038,transcript_HQ_HBZL_transcript9700/f3p0/2095,transcript_HQ_HBZL_transcript15371/f10p0/1653,trans…
ript9270/f10p0/1950,transcript_HQ_YNMLP_transcript8020/f2p0/2573,transcript_HQ_YNMLP_transcript3413/f2p0/3216,transcript_HQ_HBZL_transcript7859/f10p0/2220,transcript_HQ_YNLB_transcript1341/f4p0/3767,transcript_HQ_HBZL_transcript4862/f2p0/2592,transcript_HQ_YNMLP_transcript8494/f5p0/2542,transcript_HQ_HBZL_transcript12158/f2p0/1867,transcript_HQ_YNLB_transcript8879/f2p0/2271,transcript_HQ_HBZL_tra…
ript12369/f3p0/1864,transcript_HQ_SCJY_transcript6434/f2p0/2322,transcript_HQ_HBZL_transcript13429/f5p0/1775,transcript_HQ_YNMLP_transcript9574/f2p0/2476,transcript_HQ_YNMLP_transcript131/f3p0/5993,transcript_HQ_HBZL_transcript13356/f2p0/1835,transcript_HQ_YNLB_transcript18089/f2p0/1201,transcript_HQ_YNLB_transcript11950/f2p0/2022,transcript_HQ_SCJY_transcript4199/f4p0/2600,transcript_HQ_YNMLP_tr…
0/f2p0/2894,transcript_HQ_YNLB_transcript13242/f2p0/1837,transcript_HQ_HBZL_transcript19220/f8p0/1333,transcript_HQ_HBZL_transcript6103/f10p0/2456,transcript_HQ_YNMLP_transcript18496/f6p0/1389,transcript_HQ_YNMLP_transcript580/f2p0/4452,transcript_HQ_YNLB_transcript17332/f2p0/1353,transcript_HQ_HBZL_transcript14088/f3p0/1751,transcript_HQ_YNMLP_transcript20639/f2p0/1132,transcript_HQ_SCJY_transcr…
1150,transcript_HQ_SCJY_transcript4066/f18p0/2605,transcript_HQ_YNMLP_transcript28202/f2p0/331,transcript_HQ_YNMLP_transcript26128/f2p0/588,transcript_HQ_HBZL_transcript21423/f8p0/1101,transcript_HQ_HBZL_transcript2359/f21p0/3118,transcript_HQ_HBZL_transcript11739/f2p0/1920,transcript_HQ_YNMLP_transcript15138/f3p0/1805,transcript_HQ_YNLB_transcript9098/f2p0/2252,transcript_HQ_YNLB_transcript16531…
0,transcript_HQ_YNMLP_transcript18600/f2p0/1388,transcript_HQ_YNLB_transcript2944/f2p0/3136,transcript_HQ_YNMLP_transcript23040/f8p0/894,transcript_HQ_HBZL_transcript24709/f2p0/748,transcript_HQ_HBZL_transcript14207/f4p0/1751,transcript_HQ_HBZL_transcript19132/f2p0/1384,transcript_HQ_YNMLP_transcript6545/f35p0/2743,transcript_HQ_HBZL_transcript12424/f4p0/1848,transcript_HQ_YNLB_transcript17577/f2…
EZ_transcript6238/f7p0/2405,transcript_HQ_YNLB_transcript1220/f3p0/3815,transcript_HQ_SCJY_transcript9386/f2p0/2034,transcript_HQ_HBZL_transcript8706/f4p0/2173,transcript_HQ_HBZL_transcript2057/f10p0/3227,transcript_HQ_HBZL_transcript27075/f2p0/505,transcript_HQ_YNLB_transcript18589/f2p0/1131,transcript_HQ_HBZL_transcript14768/f5p0/1694,transcript_HQ_YNMLP_transcript14660/f10p0/1876,transcript_HQ…
/1409,transcript_HQ_YNLB_transcript17860/f2p0/1225,transcript_HQ_YNMLP_transcript2960/f2p0/3339,transcript_HQ_HBZL_transcript14301/f4p0/1747,transcript_HQ_HBZL_transcript19357/f2p0/1315,transcript_HQ_YNMLP_transcript6981/f2p0/2759,transcript_HQ_SCJY_transcript10113/f2p0/1945,transcript_HQ_YNMLP_transcript6062/f3p0/2774,transcript_HQ_SCJY_transcript4806/f2p0/2512,transcript_HQ_HBZL_transcript17384…
ript_HQ_YNMLP_transcript16173/f2p0/1684,transcript_HQ_HBZL_transcript19652/f6p0/1296,transcript_HQ_HBZL_transcript10847/f2p0/1961,transcript_HQ_YNLB_transcript826/f2p0/4050,transcript_HQ_YNMLP_transcript20241/f2p0/1152,transcript_HQ_YNMLP_transcript8519/f11p0/2527,transcript_HQ_YNMLP_transcript14397/f5p0/1878,transcript_HQ_YNMLP_transcript18979/f2p0/1324,transcript_HQ_HBZL_transcript3857/f3p0/277…
GO:0004427	inorganic diphosphatase activity	molecular_function	0.0085893	0.75212	37	22033	50	39009	transcript_HQ_HBZL_transcript20121/f2p0/1231,transcript_HQ_HBZL_transcript19697/f3p0/1285,transcript_HQ_YNLB_transcript8589/f2p0/2277,transcript_HQ_HBZL_transcript12883/f2p0/1821,transcript_HQ_YNLB_transcript4411/f2p0/2815,transcript_HQ_HBZL_transcript5106/f2p0/2611,transcript_HQ_YNLB_transcript4936/f5p0/2761,transcript_HQ_YNLB_transcript18330/f2p0/1189,transcript_HQ_HBZL_transcript16907/f7p0/154…
GO:0006468	protein phosphorylation	biological_process	0.0099931	0.85045	1682	22033	2841	39009	transcript_HQ_YNMLP_transcript17158/f2p0/1564,transcript_HQ_YNMLP_transcript10191/f14p0/2373,transcript_HQ_SCJY_transcript17750/f2p0/995,transcript_HQ_HBZL_transcript7722/f10p0/2249,transcript_HQ_HBZL_transcript3987/f6p0/2730,transcript_HQ_HBZL_transcript5468/f2p0/2526,transcript_HQ_HBZL_transcript8452/f4p0/2178,transcript_HQ_HBZL_transcript11874/f3p0/1902,transcript_HQ_SCEZ_transcript10110/f8p0/…
t_HQ_SCJY_transcript10950/f6p0/1771,transcript_HQ_HBZL_transcript6857/f3p0/2385,transcript_HQ_HBZL_transcript2141/f2p0/3191,transcript_HQ_YNLB_transcript11470/f3p0/2037,transcript_HQ_YNLB_transcript4091/f2p0/2897,transcript_HQ_YNLB_transcript11306/f2p0/2019,transcript_HQ_YNMLP_transcript14663/f13p0/1870,transcript_HQ_HBZL_transcript13100/f3p0/1814,transcript_HQ_HBZL_transcript7797/f5p0/2238,trans…
MLP_transcript3970/f2p0/3117,transcript_HQ_SCJY_transcript11591/f5p0/1764,transcript_HQ_HBZL_transcript7129/f2p0/2311,transcript_HQ_HBZL_transcript10657/f2p0/2052,transcript_HQ_HBZL_transcript5531/f6p0/2533,transcript_HQ_SCJY_transcript8088/f9p0/2124,transcript_HQ_HBZL_transcript6424/f2p0/2399,transcript_HQ_HBZL_transcript3652/f46p0/2800,transcript_HQ_YNLB_transcript3591/f5p0/2990,transcript_HQ_Y…
GO:0019899	enzyme binding	molecular_function	0.010134	0.85045	131	22033	198	39009	transcript_HQ_SCJY_transcript207/f2p0/4189,transcript_HQ_HBZL_transcript10327/f2p0/2014,transcript_HQ_HBZL_transcript1016/f2p0/3754,transcript_HQ_HBZL_transcript869/f2p0/3879,transcript_HQ_HBZL_transcript1678/f3p0/3408,transcript_HQ_SCJY_transcript8464/f2p0/2185,transcript_HQ_HBZL_transcript21763/f3p0/1062,transcript_HQ_HBZL_transcript1326/f3p0/3571,transcript_HQ_YNMLP_transcript5324/f2p0/2881,tr…
GO:0016298	lipase activity	molecular_function	0.010975	0.86103	40	22033	55	39009	transcript_HQ_HBZL_transcript17685/f2p0/1487,transcript_HQ_HBZL_transcript2013/f4p0/3263,transcript_HQ_YNMLP_transcript1955/f2p0/3622,transcript_HQ_YNMLP_transcript1555/f2p0/3783,transcript_HQ_HBZL_transcript6836/f10p0/2350,transcript_HQ_YNMLP_transcript881/f2p0/4212,transcript_HQ_YNLB_transcript1810/f2p0/3515,transcript_HQ_HBZL_transcript18430/f2p0/1419,transcript_HQ_HBZL_transcript6989/f2p0/231…
GO:0005375	copper ion transmembrane transporter activity	molecular_function	0.011104	0.86103	10	22033	11	39009	transcript_HQ_HBZL_transcript25433/f2p0/678,transcript_HQ_YNLB_transcript17839/f2p0/1239,transcript_HQ_YNLB_transcript23146/f3p0/654,transcript_HQ_YNMLP_transcript18907/f5p0/1331,transcript_HQ_SCJY_transcript15745/f6p0/1263,transcript_HQ_HBZL_transcript25881/f2p0/639,transcript_HQ_SCJY_transcript21231/f4p0/583,transcript_HQ_YNLB_transcript20923/f2p0/848,transcript_HQ_SCJY_transcript20682/f9p0/694…
GO:0035434	copper ion transmembrane transport	biological_process	0.011104	0.86103	10	22033	11	39009	transcript_HQ_YNMLP_transcript24628/f4p0/728,transcript_HQ_YNLB_transcript20923/f2p0/848,transcript_HQ_HBZL_transcript25881/f2p0/639,transcript_HQ_SCJY_transcript21231/f4p0/583,transcript_HQ_SCJY_transcript20682/f9p0/694,transcript_HQ_SCJY_transcript15745/f6p0/1263,transcript_HQ_YNMLP_transcript18907/f5p0/1331,transcript_HQ_YNLB_transcript23146/f3p0/654,transcript_HQ_YNLB_transcript17839/f2p0/123…
GO:0070566	adenylyltransferase activity	molecular_function	0.011116	0.86103	51	22033	72	39009	transcript_HQ_HBZL_transcript13348/f2p0/1786,transcript_HQ_YNMLP_transcript11998/f2p0/2156,transcript_HQ_SCEZ_transcript22774/f3p0/927,transcript_HQ_SCEZ_transcript20178/f3p0/1189,transcript_HQ_HBZL_transcript13216/f13p0/1886,transcript_HQ_SCJY_transcript936/f2p0/3436,transcript_HQ_YNMLP_transcript13582/f2p0/2008,transcript_HQ_YNMLP_transcript18870/f2p0/1338,transcript_HQ_HBZL_transcript13892/f2p…
GO:0046870	cadmium ion binding	molecular_function	0.011593	0.88104	8	22033	8	39009	transcript_HQ_HBZL_transcript2844/f3p0/2991,transcript_HQ_HBZL_transcript7861/f3p0/2227,transcript_HQ_HBZL_transcript5038/f3p0/2561,transcript_HQ_HBZL_transcript3326/f22p0/2863,transcript_HQ_YNLB_transcript3591/f5p0/2990,transcript_HQ_YNMLP_transcript9502/f3p0/2436,transcript_HQ_YNMLP_transcript3887/f2p0/3151,transcript_HQ_HBZL_transcript8818/f4p0/2136
GO:0048037	cofactor binding	molecular_function	0.011974	0.89321	934	22033	1579	39009	transcript_HQ_YNLB_transcript18020/f16p0/1223,transcript_HQ_YNMLP_transcript11856/f9p0/2195,transcript_HQ_YNLB_transcript18338/f3p0/1191,transcript_HQ_YNMLP_transcript9245/f2p0/2276,transcript_HQ_SCJY_transcript7513/f40p0/2194,transcript_HQ_SCJY_transcript15477/f6p0/1269,transcript_HQ_HBZL_transcript21066/f2p0/1156,transcript_HQ_HBZL_transcript20152/f3p0/1263,transcript_HQ_HBZL_transcript2809/f3p…
0/2597,transcript_HQ_YNMLP_transcript13377/f2p0/2020,transcript_HQ_HBZL_transcript11279/f8p0/1934,transcript_HQ_SCEZ_transcript5341/f2p0/2503,transcript_HQ_SCJY_transcript14740/f2p0/1377,transcript_HQ_YNLB_transcript15491/f11p0/1575,transcript_HQ_HBZL_transcript3055/f2p0/2956,transcript_HQ_HBZL_transcript20709/f4p0/1186,transcript_HQ_YNMLP_transcript16784/f4p0/1598,transcript_HQ_YNLB_transcript11…
GO:0031419	cobalamin binding	molecular_function	0.012652	0.91038	13	22033	15	39009	transcript_HQ_YNLB_transcript19197/f3p0/1050,transcript_HQ_SCEZ_transcript10419/f2p0/1995,transcript_HQ_SCJY_transcript11064/f3p0/1817,transcript_HQ_HBZL_transcript15568/f2p0/1632,transcript_HQ_YNLB_transcript19067/f4p0/1068,transcript_HQ_YNMLP_transcript18574/f3p0/1374,transcript_HQ_SCJY_transcript17318/f2p0/1045,transcript_HQ_SCJY_transcript9221/f2p0/2040,transcript_HQ_HBZL_transcript17169/f9p0…
GO:0006022	aminoglycan metabolic process	biological_process	0.012713	0.91038	52	22033	75	39009	transcript_HQ_HBZL_transcript18556/f2p0/1424,transcript_HQ_HBZL_transcript21309/f3p0/1136,transcript_HQ_YNMLP_transcript1085/f3p0/4009,transcript_HQ_SCJY_transcript18439/f2p0/927,transcript_HQ_YNLB_transcript18014/f5p0/1214,transcript_HQ_YNLB_transcript2453/f3p0/3283,transcript_HQ_SCEZ_transcript20883/f2p0/1097,transcript_HQ_HBZL_transcript21171/f5p0/1158,transcript_HQ_HBZL_transcript21836/f7p0/1…
GO:0016746	transferase activity, transferring acyl groups	molecular_function	0.012883	0.91038	355	22033	582	39009	transcript_HQ_YNLB_transcript66/f2p0/6583,transcript_HQ_HBZL_transcript15300/f7p0/1661,transcript_HQ_YNMLP_transcript19555/f2p0/1255,transcript_HQ_SCJY_transcript6982/f2p0/2268,transcript_HQ_YNMLP_transcript10501/f4p0/2382,transcript_HQ_HBZL_transcript11582/f6p0/1916,transcript_HQ_HBZL_transcript16161/f10p0/1608,transcript_HQ_SCJY_transcript8832/f5p0/2048,transcript_HQ_YNMLP_transcript13159/f2p0/…
GO:0016702	oxidoreductase activity, acting on single donors with incorporation of molecular oxygen, incorporation of two atoms of oxygen	molecular_function	0.01326	0.92088	90	22033	135	39009	transcript_HQ_HBZL_transcript12587/f2p0/1876,transcript_HQ_YNMLP_transcript12785/f10p0/2036,transcript_HQ_HBZL_transcript3098/f12p0/2906,transcript_HQ_HBZL_transcript2211/f8p0/3186,transcript_HQ_HBZL_transcript733/f2p0/3995,transcript_HQ_YNLB_transcript3810/f2p0/2939,transcript_HQ_YNLB_transcript4115/f11p0/2890,transcript_HQ_HBZL_transcript18384/f3p0/1394,transcript_HQ_SCJY_transcript7816/f5p0/21…
GO:0007610	behavior	biological_process	0.013544	0.92369	8	22033	8	39009	transcript_HQ_YNLB_transcript3658/f4p0/2951,transcript_HQ_HBZL_transcript2652/f9p0/3063,transcript_HQ_YNLB_transcript654/f2p0/4318,transcript_HQ_HBZL_transcript3400/f2p0/2888,transcript_HQ_HBZL_transcript3649/f2p0/2802,transcript_HQ_YNLB_transcript282/f4p0/5019,transcript_HQ_SCJY_transcript7047/f2p0/2390,transcript_HQ_YNMLP_transcript4024/f6p0/3110
GO:0005506	iron ion binding	molecular_function	0.013759	0.92369	427	22033	706	39009	transcript_HQ_HBZL_transcript8376/f3p0/2199,transcript_HQ_HBZL_transcript14540/f7p0/1715,transcript_HQ_HBZL_transcript21775/f2p0/1065,transcript_HQ_HBZL_transcript11735/f2p0/1919,transcript_HQ_HBZL_transcript12030/f3p0/1891,transcript_HQ_HBZL_transcript16271/f4p0/1589,transcript_HQ_HBZL_transcript13809/f5p0/1796,transcript_HQ_SCJY_transcript11925/f4p0/1728,transcript_HQ_HBZL_transcript19887/f4p0/…
GO:0003333	amino acid transmembrane transport	biological_process	0.014735	0.97297	74	22033	110	39009	transcript_HQ_YNLB_transcript9141/f2p0/2250,transcript_HQ_YNLB_transcript11037/f3p0/2041,transcript_HQ_HBZL_transcript1236/f2p0/3627,transcript_HQ_HBZL_transcript15095/f2p0/1675,transcript_HQ_HBZL_transcript15096/f2p0/1673,transcript_HQ_HBZL_transcript12299/f9p0/1855,transcript_HQ_YNMLP_transcript12684/f3p0/2086,transcript_HQ_SCJY_transcript4850/f2p0/2547,transcript_HQ_YNLB_transcript11205/f4p0/2…
GO:0006793	phosphorus metabolic process	biological_process	0.017212	1	2249	22033	3841	39009	transcript_HQ_YNLB_transcript9827/f4p0/2205,transcript_HQ_YNLB_transcript12825/f3p0/1871,transcript_HQ_YNLB_transcript1330/f2p0/3764,transcript_HQ_HBZL_transcript14408/f11p0/1638,transcript_HQ_YNLB_transcript587/f4p0/4378,transcript_HQ_HBZL_transcript14872/f2p0/1702,transcript_HQ_HBZL_transcript9104/f2p0/2115,transcript_HQ_HBZL_transcript6327/f2p0/2411,transcript_HQ_SCJY_transcript5059/f6p0/2495,…
ipt_HQ_HBZL_transcript18474/f6p0/1422,transcript_HQ_YNMLP_transcript13995/f2p0/1941,transcript_HQ_SCEZ_transcript22317/f2p0/944,transcript_HQ_YNMLP_transcript13648/f8p0/1975,transcript_HQ_YNLB_transcript4660/f40p0/2748,transcript_HQ_HBZL_transcript15651/f2p0/1628,transcript_HQ_YNMLP_transcript3927/f5p0/3111,transcript_HQ_YNMLP_transcript3880/f4p0/3110,transcript_HQ_HBZL_transcript4429/f5p0/2425,t…
44/f2p0/2437,transcript_HQ_HBZL_transcript8895/f2p0/2127,transcript_HQ_YNMLP_transcript7529/f2p0/2651,transcript_HQ_HBZL_transcript7687/f5p0/2256,transcript_HQ_YNLB_transcript2285/f3p0/3329,transcript_HQ_HBZL_transcript7673/f2p0/2249,transcript_HQ_YNMLP_transcript3358/f3p0/3227,transcript_HQ_HBZL_transcript1966/f2p0/3329,transcript_HQ_SCEZ_transcript15440/f2p0/1618,transcript_HQ_HBZL_transcript11…
_YNMLP_transcript9176/f4p0/2386,transcript_HQ_YNLB_transcript6288/f2p0/2570,transcript_HQ_HBZL_transcript6839/f2p0/2344,transcript_HQ_YNMLP_transcript8438/f3p0/2538,transcript_HQ_SCEZ_transcript19495/f3p0/1265,transcript_HQ_HBZL_transcript2926/f3p0/2989,transcript_HQ_HBZL_transcript19457/f2p0/1318,transcript_HQ_YNMLP_transcript5477/f3p0/2880,transcript_HQ_YNLB_transcript6174/f2p0/2562,transcript_…
GO:0000166	nucleotide binding	molecular_function	0.01779	1	4116	22033	7065	39009	transcript_HQ_YNMLP_transcript2829/f13p0/3364,transcript_HQ_SCEZ_transcript2930/f2p0/2893,transcript_HQ_SCJY_transcript16854/f2p0/1149,transcript_HQ_YNLB_transcript5194/f8p0/2726,transcript_HQ_HBZL_transcript18041/f5p0/1446,transcript_HQ_HBZL_transcript2313/f7p0/3128,transcript_HQ_SCJY_transcript13137/f2p0/1595,transcript_HQ_HBZL_transcript4287/f2p0/2708,transcript_HQ_SCJY_transcript15914/f2p0/12…
_transcript4112/f2p0/2716,transcript_HQ_HBZL_transcript2835/f2p0/2991,transcript_HQ_HBZL_transcript7074/f2p0/2319,transcript_HQ_SCJY_transcript4730/f5p0/2536,transcript_HQ_YNLB_transcript9557/f6p0/2204,transcript_HQ_HBZL_transcript179/f3p0/5197,transcript_HQ_HBZL_transcript7788/f2p0/2240,transcript_HQ_YNLB_transcript13573/f3p0/1788,transcript_HQ_HBZL_transcript14209/f2p0/1771,transcript_HQ_HBZL_t…
ript5654/f2p0/2653,transcript_HQ_YNMLP_transcript2216/f2p0/3542,transcript_HQ_HBZL_transcript15670/f3p0/1650,transcript_HQ_YNMLP_transcript173/f2p0/5746,transcript_HQ_HBZL_transcript12957/f5p0/1828,transcript_HQ_HBZL_transcript568/f2p0/4158,transcript_HQ_HBZL_transcript9346/f9p0/2095,transcript_HQ_SCEZ_transcript7233/f2p0/2252,transcript_HQ_YNLB_transcript10751/f2p0/2071,transcript_HQ_YNMLP_trans…
Q_HBZL_transcript16261/f2p0/1594,transcript_HQ_YNLB_transcript16518/f4p0/1443,transcript_HQ_HBZL_transcript13042/f10p0/1842,transcript_HQ_HBZL_transcript16944/f2p0/1541,transcript_HQ_HBZL_transcript15783/f18p0/1616,transcript_HQ_YNLB_transcript4262/f2p0/2846,transcript_HQ_HBZL_transcript590/f3p0/4152,transcript_HQ_HBZL_transcript12313/f2p0/1860,transcript_HQ_SCJY_transcript1741/f2p0/3121,transcri…
pt17529/f3p0/1034,transcript_HQ_SCEZ_transcript13541/f6p0/1745,transcript_HQ_YNMLP_transcript1624/f7p0/3751,transcript_HQ_HBZL_transcript16115/f3p0/1599,transcript_HQ_YNMLP_transcript13462/f2p0/1983,transcript_HQ_HBZL_transcript711/f2p0/3995,transcript_HQ_HBZL_transcript5509/f2p0/2517,transcript_HQ_YNMLP_transcript11052/f9p0/2297,transcript_HQ_HBZL_transcript24529/f2p0/782,transcript_HQ_HBZL_tran…
anscript_HQ_YNLB_transcript1339/f2p0/3752,transcript_HQ_HBZL_transcript5028/f10p0/2539,transcript_HQ_SCJY_transcript7286/f2p0/2255,transcript_HQ_YNMLP_transcript6238/f2p0/2759,transcript_HQ_YNLB_transcript3197/f9p0/3083,transcript_HQ_HBZL_transcript8090/f2p0/2218,transcript_HQ_YNMLP_transcript12011/f4p0/2155,transcript_HQ_SCJY_transcript15239/f2p0/1306,transcript_HQ_HBZL_transcript4103/f2p0/2735,…
GO:1901265	nucleoside phosphate binding	molecular_function	0.01779	1	4116	22033	7065	39009	transcript_HQ_YNMLP_transcript6312/f2p0/2754,transcript_HQ_HBZL_transcript6712/f2p0/2363,transcript_HQ_YNMLP_transcript930/f2p0/4131,transcript_HQ_HBZL_transcript8296/f10p0/2221,transcript_HQ_HBZL_transcript3906/f2p0/2792,transcript_HQ_HBZL_transcript11715/f10p0/1887,transcript_HQ_YNMLP_transcript10990/f2p0/2262,transcript_HQ_HBZL_transcript5028/f10p0/2539,transcript_HQ_YNLB_transcript1339/f2p0/3…
t_HQ_HBZL_transcript8316/f2p0/2185,transcript_HQ_HBZL_transcript22284/f7p0/1022,transcript_HQ_HBZL_transcript5166/f4p0/2560,transcript_HQ_HBZL_transcript14672/f6p0/1711,transcript_HQ_YNLB_transcript351/f2p0/4862,transcript_HQ_YNLB_transcript10181/f3p0/2145,transcript_HQ_YNMLP_transcript19949/f3p0/1198,transcript_HQ_YNMLP_transcript1626/f2p0/3866,transcript_HQ_HBZL_transcript4043/f3p0/2740,transcr…
,transcript_HQ_HBZL_transcript11251/f2p0/1938,transcript_HQ_YNLB_transcript11614/f10p0/1966,transcript_HQ_SCJY_transcript9794/f3p0/1950,transcript_HQ_YNLB_transcript1782/f2p0/3521,transcript_HQ_YNLB_transcript12983/f6p0/1819,transcript_HQ_HBZL_transcript4221/f5p0/2514,transcript_HQ_HBZL_transcript15257/f2p0/1694,transcript_HQ_HBZL_transcript8318/f3p0/2193,transcript_HQ_HBZL_transcript12211/f2p0/1…
anscript1420/f2p0/3595,transcript_HQ_YNMLP_transcript7749/f2p0/2660,transcript_HQ_SCJY_transcript11796/f17p0/1727,transcript_HQ_HBZL_transcript9615/f2p0/2073,transcript_HQ_HBZL_transcript18901/f6p0/1376,transcript_HQ_YNMLP_transcript13682/f2p0/1920,transcript_HQ_SCJY_transcript13248/f2p0/1586,transcript_HQ_HBZL_transcript9976/f9p0/2044,transcript_HQ_HBZL_transcript21868/f2p0/1054,transcript_HQ_YN…
6,transcript_HQ_YNMLP_transcript5470/f4p0/2863,transcript_HQ_HBZL_transcript17666/f4p0/1471,transcript_HQ_HBZL_transcript5629/f2p0/2492,transcript_HQ_HBZL_transcript22450/f2p0/986,transcript_HQ_HBZL_transcript7217/f2p0/2343,transcript_HQ_HBZL_transcript23128/f2p0/908,transcript_HQ_HBZL_transcript2110/f2p0/3246,transcript_HQ_HBZL_transcript13966/f2p0/1768,transcript_HQ_SCJY_transcript8611/f4p0/205…
ipt_HQ_HBZL_transcript19934/f2p0/1258,transcript_HQ_YNMLP_transcript24434/f2p0/751,transcript_HQ_HBZL_transcript7274/f2p0/2312,transcript_HQ_HBZL_transcript17880/f2p0/1459,transcript_HQ_HBZL_transcript5540/f3p0/2529,transcript_HQ_SCJY_transcript10689/f2p0/1865,transcript_HQ_HBZL_transcript3326/f22p0/2863,transcript_HQ_HBZL_transcript92/f4p0/5958,transcript_HQ_HBZL_transcript4546/f4p0/2517,transcr…
GO:0005544	calcium-dependent phospholipid binding	molecular_function	0.018289	1	40	22033	57	39009	transcript_HQ_YNLB_transcript17911/f3p0/1249,transcript_HQ_YNMLP_transcript9974/f4p0/2390,transcript_HQ_HBZL_transcript17989/f4p0/1463,transcript_HQ_HBZL_transcript18250/f2p0/1431,transcript_HQ_YNLB_transcript15421/f4p0/1575,transcript_HQ_HBZL_transcript20033/f3p0/1241,transcript_HQ_YNLB_transcript14491/f5p0/1688,transcript_HQ_YNLB_transcript13992/f2p0/1742,transcript_HQ_HBZL_transcript5195/f2p0/…
GO:0006796	phosphate-containing compound metabolic process	biological_process	0.018426	1	2246	22033	3837	39009	transcript_HQ_HBZL_transcript23590/f2p0/859,transcript_HQ_YNLB_transcript8810/f2p0/2299,transcript_HQ_SCJY_transcript19087/f2p0/850,transcript_HQ_HBZL_transcript14103/f3p0/1739,transcript_HQ_HBZL_transcript3589/f2p0/2812,transcript_HQ_HBZL_transcript21605/f2p0/1073,transcript_HQ_SCJY_transcript14902/f3p0/1386,transcript_HQ_HBZL_transcript10972/f3p0/1967,transcript_HQ_YNLB_transcript926/f2p0/4005,…
76/f2p0/3342,transcript_HQ_YNMLP_transcript632/f2p0/4443,transcript_HQ_YNMLP_transcript13405/f17p0/1927,transcript_HQ_YNLB_transcript4486/f2p0/2845,transcript_HQ_YNLB_transcript4544/f2p0/2805,transcript_HQ_HBZL_transcript1120/f2p0/3677,transcript_HQ_HBZL_transcript7673/f2p0/2249,transcript_HQ_SCEZ_transcript15440/f2p0/1618,transcript_HQ_HBZL_transcript1966/f2p0/3329,transcript_HQ_YNMLP_transcript…
MLP_transcript6666/f3p0/2721,transcript_HQ_SCJY_transcript12344/f6p0/1687,transcript_HQ_HBZL_transcript10168/f5p0/2051,transcript_HQ_HBZL_transcript5403/f2p0/2533,transcript_HQ_HBZL_transcript1752/f5p0/3352,transcript_HQ_YNMLP_transcript9806/f2p0/2410,transcript_HQ_SCJY_transcript14488/f2p0/1415,transcript_HQ_SCJY_transcript7552/f4p0/2197,transcript_HQ_SCJY_transcript6309/f2p0/2346,transcript_HQ_…
MLP_transcript5229/f3p0/2923,transcript_HQ_HBZL_transcript1939/f2p0/3295,transcript_HQ_HBZL_transcript6383/f4p0/2415,transcript_HQ_SCJY_transcript7367/f3p0/2236,transcript_HQ_HBZL_transcript2785/f6p0/2950,transcript_HQ_YNMLP_transcript10511/f7p0/2315,transcript_HQ_YNLB_transcript17577/f2p0/1291,transcript_HQ_SCJY_transcript13528/f3p0/1588,transcript_HQ_YNLB_transcript22911/f2p0/636,transcript_HQ_…
GO:0022414	reproductive process	biological_process	0.019173	1	118	22033	182	39009	transcript_HQ_YNMLP_transcript6597/f2p0/2725,transcript_HQ_HBZL_transcript16142/f2p0/1598,transcript_HQ_YNLB_transcript14437/f4p0/1690,transcript_HQ_HBZL_transcript4312/f2p0/2706,transcript_HQ_HBZL_transcript5468/f2p0/2526,transcript_HQ_HBZL_transcript3695/f43p0/2717,transcript_HQ_YNLB_transcript654/f2p0/4318,transcript_HQ_YNLB_transcript6431/f8p0/2478,transcript_HQ_YNLB_transcript14104/f2p0/1727…
GO:0016830	carbon-carbon lyase activity	molecular_function	0.019661	1	200	22033	321	39009	transcript_HQ_YNLB_transcript15017/f3p0/1645,transcript_HQ_HBZL_transcript3745/f2p0/2781,transcript_HQ_YNLB_transcript15193/f3p0/1621,transcript_HQ_HBZL_transcript326/f2p0/4624,transcript_HQ_SCJY_transcript16200/f2p0/1181,transcript_HQ_YNMLP_transcript17848/f13p0/1405,transcript_HQ_YNLB_transcript16878/f2p0/1375,transcript_HQ_YNLB_transcript16310/f9p0/1489,transcript_HQ_SCEZ_transcript1362/f2p0/3…
GO:0098656	anion transmembrane transport	biological_process	0.01989	1	74	22033	111	39009	transcript_HQ_SCJY_transcript3672/f2p0/2644,transcript_HQ_YNLB_transcript11205/f4p0/2024,transcript_HQ_HBZL_transcript7723/f5p0/2255,transcript_HQ_HBZL_transcript6153/f6p0/2418,transcript_HQ_HBZL_transcript12299/f9p0/1855,transcript_HQ_HBZL_transcript15096/f2p0/1673,transcript_HQ_HBZL_transcript15095/f2p0/1675,transcript_HQ_YNLB_transcript11037/f3p0/2041,transcript_HQ_HBZL_transcript1236/f2p0/362…
GO:1903825	organic acid transmembrane transport	biological_process	0.01989	1	74	22033	111	39009	transcript_HQ_SCJY_transcript9448/f3p0/2094,transcript_HQ_YNMLP_transcript14122/f5p0/1923,transcript_HQ_HBZL_transcript10172/f7p0/2072,transcript_HQ_HBZL_transcript13871/f2p0/1776,transcript_HQ_YNMLP_transcript15039/f2p0/1841,transcript_HQ_YNMLP_transcript13848/f2p0/1951,transcript_HQ_SCEZ_transcript1306/f2p0/3456,transcript_HQ_YNMLP_transcript15961/f5p0/1706,transcript_HQ_YNLB_transcript15278/f3…
GO:0006568	tryptophan metabolic process	biological_process	0.020711	1	14	22033	17	39009	transcript_HQ_YNMLP_transcript18574/f3p0/1374,transcript_HQ_HBZL_transcript17169/f9p0/1518,transcript_HQ_SCJY_transcript13525/f2p0/1554,transcript_HQ_HBZL_transcript15568/f2p0/1632,transcript_HQ_YNMLP_transcript21149/f2p0/1068,transcript_HQ_HBZL_transcript21662/f7p0/1077,transcript_HQ_SCJY_transcript18482/f3p0/930,transcript_HQ_YNLB_transcript18814/f2p0/1096,transcript_HQ_YNLB_transcript18535/f2p…
GO:0006586	indolalkylamine metabolic process	biological_process	0.020711	1	14	22033	17	39009	transcript_HQ_YNMLP_transcript20535/f11p0/1148,transcript_HQ_YNLB_transcript15760/f2p0/1543,transcript_HQ_HBZL_transcript18841/f2p0/1371,transcript_HQ_YNMLP_transcript18574/f3p0/1374,transcript_HQ_HBZL_transcript17169/f9p0/1518,transcript_HQ_SCJY_transcript13525/f2p0/1554,transcript_HQ_YNMLP_transcript21149/f2p0/1068,transcript_HQ_SCJY_transcript18482/f3p0/930,transcript_HQ_HBZL_transcript21662/f…
GO:0042430	indole-containing compound metabolic process	biological_process	0.020711	1	14	22033	17	39009	transcript_HQ_YNLB_transcript18814/f2p0/1096,transcript_HQ_YNLB_transcript18535/f2p0/1159,transcript_HQ_HBZL_transcript20005/f2p0/1254,transcript_HQ_YNLB_transcript16042/f2p0/1504,transcript_HQ_HBZL_transcript21662/f7p0/1077,transcript_HQ_YNMLP_transcript21149/f2p0/1068,transcript_HQ_SCJY_transcript18482/f3p0/930,transcript_HQ_HBZL_transcript15568/f2p0/1632,transcript_HQ_SCJY_transcript13525/f2p0…
GO:0031324	negative regulation of cellular metabolic process	biological_process	0.021933	1	43	22033	61	39009	transcript_HQ_HBZL_transcript315/f2p0/4645,transcript_HQ_SCEZ_transcript19783/f4p0/1209,transcript_HQ_HBZL_transcript15681/f3p0/1684,transcript_HQ_HBZL_transcript14890/f3p0/1688,transcript_HQ_YNLB_transcript18947/f2p0/1046,transcript_HQ_YNLB_transcript48/f2p0/6942,transcript_HQ_YNMLP_transcript18728/f2p0/1363,transcript_HQ_YNLB_transcript2119/f2p0/3387,transcript_HQ_SCJY_transcript19926/f2p0/777,…
GO:0004650	polygalacturonase activity	molecular_function	0.022006	1	26	22033	35	39009	transcript_HQ_HBZL_transcript16558/f5p0/1572,transcript_HQ_HBZL_transcript7268/f3p0/2267,transcript_HQ_HBZL_transcript24111/f2p0/782,transcript_HQ_HBZL_transcript14746/f4p0/1684,transcript_HQ_YNLB_transcript11112/f14p0/2023,transcript_HQ_SCEZ_transcript13521/f3p0/1745,transcript_HQ_YNMLP_transcript17221/f2p0/1593,transcript_HQ_HBZL_transcript15050/f2p0/1683,transcript_HQ_HBZL_transcript17021/f3p0…
GO:0042325	regulation of phosphorylation	biological_process	0.022104	1	12	22033	14	39009	transcript_HQ_HBZL_transcript21423/f8p0/1101,transcript_HQ_YNMLP_transcript3606/f2p0/3300,transcript_HQ_HBZL_transcript21002/f2p0/1143,transcript_HQ_HBZL_transcript7028/f4p0/2305,transcript_HQ_HBZL_transcript315/f2p0/4645,transcript_HQ_HBZL_transcript1925/f2p0/3331,transcript_HQ_HBZL_transcript21239/f2p0/1108,transcript_HQ_YNLB_transcript19306/f2p0/1047,transcript_HQ_HBZL_transcript20002/f9p0/124…
GO:0003919	FMN adenylyltransferase activity	molecular_function	0.02226	1	14	22033	17	39009	transcript_HQ_HBZL_transcript13892/f2p0/1769,transcript_HQ_YNMLP_transcript21882/f2p0/994,transcript_HQ_SCJY_transcript18117/f2p0/958,transcript_HQ_HBZL_transcript12113/f4p0/1879,transcript_HQ_YNLB_transcript13304/f3p0/1845,transcript_HQ_HBZL_transcript12967/f3p0/1831,transcript_HQ_YNMLP_transcript14438/f4p0/1905,transcript_HQ_SCEZ_transcript20178/f3p0/1189,transcript_HQ_YNMLP_transcript11998/f2p…
GO:0010604	positive regulation of macromolecule metabolic process	biological_process	0.02236	1	48	22033	70	39009	transcript_HQ_HBZL_transcript1925/f2p0/3331,transcript_HQ_YNLB_transcript20482/f3p0/947,transcript_HQ_HBZL_transcript16738/f2p0/1555,transcript_HQ_YNMLP_transcript21956/f3p0/985,transcript_HQ_HBZL_transcript5471/f2p0/2514,transcript_HQ_YNMLP_transcript21819/f2p0/996,transcript_HQ_YNLB_transcript19306/f2p0/1047,transcript_HQ_HBZL_transcript17167/f9p0/1513,transcript_HQ_HBZL_transcript3699/f4p0/281…
GO:0005092	GDP-dissociation inhibitor activity	molecular_function	0.025841	1	20	22033	26	39009	transcript_HQ_YNMLP_transcript17146/f3p0/1523,transcript_HQ_YNMLP_transcript10350/f2p0/2329,transcript_HQ_HBZL_transcript6069/f5p0/2463,transcript_HQ_HBZL_transcript12397/f2p0/1861,transcript_HQ_YNLB_transcript16113/f2p0/1488,transcript_HQ_YNLB_transcript10497/f3p0/2102,transcript_HQ_YNLB_transcript7076/f2p0/2492,transcript_HQ_YNLB_transcript12292/f14p0/1921,transcript_HQ_YNLB_transcript16034/f5p…
GO:0036094	small molecule binding	molecular_function	0.026892	1	4209	22033	7240	39009	transcript_HQ_SCJY_transcript5059/f6p0/2495,transcript_HQ_YNLB_transcript7384/f2p0/2414,transcript_HQ_YNMLP_transcript14758/f19p0/1827,transcript_HQ_YNLB_transcript11230/f8p0/2036,transcript_HQ_HBZL_transcript6327/f2p0/2411,transcript_HQ_YNMLP_transcript21729/f3p0/1005,transcript_HQ_YNMLP_transcript20576/f2p0/1140,transcript_HQ_HBZL_transcript9177/f2p0/2108,transcript_HQ_YNMLP_transcript12552/f2p…
anscript_HQ_YNLB_transcript16832/f2p0/1404,transcript_HQ_YNLB_transcript19195/f5p0/1068,transcript_HQ_SCEZ_transcript20447/f3p0/1145,transcript_HQ_HBZL_transcript5526/f2p0/2495,transcript_HQ_YNLB_transcript10385/f2p0/2116,transcript_HQ_HBZL_transcript8503/f3p0/2183,transcript_HQ_SCEZ_transcript14051/f2p0/1711,transcript_HQ_HBZL_transcript8296/f10p0/2221,transcript_HQ_YNMLP_transcript6312/f2p0/275…
ranscript_HQ_SCJY_transcript12416/f2p0/1691,transcript_HQ_HBZL_transcript17294/f4p0/1506,transcript_HQ_HBZL_transcript21571/f4p0/1084,transcript_HQ_YNMLP_transcript1271/f3p0/3896,transcript_HQ_YNLB_transcript8504/f2p0/2378,transcript_HQ_HBZL_transcript1599/f2p0/3430,transcript_HQ_YNLB_transcript530/f2p0/4421,transcript_HQ_YNLB_transcript1143/f4p0/3850,transcript_HQ_HBZL_transcript18502/f3p0/1417,…
cript10480/f2p0/2345,transcript_HQ_YNLB_transcript1378/f2p0/3710,transcript_HQ_YNMLP_transcript15195/f2p0/1803,transcript_HQ_HBZL_transcript16/f2p0/7482,transcript_HQ_YNMLP_transcript10300/f3p0/2333,transcript_HQ_SCEZ_transcript18859/f2p0/1313,transcript_HQ_HBZL_transcript4945/f5p0/2607,transcript_HQ_YNLB_transcript12647/f2p0/1886,transcript_HQ_HBZL_transcript1668/f5p0/3383,transcript_HQ_HBZL_tra…
pt14977/f3p0/1692,transcript_HQ_HBZL_transcript924/f3p0/3831,transcript_HQ_SCJY_transcript853/f2p0/3498,transcript_HQ_HBZL_transcript10248/f3p0/2033,transcript_HQ_HBZL_transcript12119/f5p0/1934,transcript_HQ_HBZL_transcript15568/f2p0/1632,transcript_HQ_HBZL_transcript3657/f2p0/2826,transcript_HQ_YNLB_transcript15594/f12p0/1560,transcript_HQ_YNLB_transcript15126/f2p0/1622,transcript_HQ_HBZL_transc…
script876/f2p0/4149,transcript_HQ_HBZL_transcript5880/f2p0/2469,transcript_HQ_HBZL_transcript19661/f5p0/1313,transcript_HQ_YNMLP_transcript13996/f2p0/1940,transcript_HQ_HBZL_transcript2360/f2p0/3159,transcript_HQ_HBZL_transcript10954/f3p0/1975,transcript_HQ_YNMLP_transcript14072/f2p0/1930,transcript_HQ_HBZL_transcript10757/f3p0/2030,transcript_HQ_HBZL_transcript7546/f2p0/2254,transcript_HQ_HBZL_t…
GO:0006026	aminoglycan catabolic process	biological_process	0.027708	1	33	22033	47	39009	transcript_HQ_YNLB_transcript16926/f19p0/1360,transcript_HQ_HBZL_transcript20918/f10p0/1164,transcript_HQ_YNLB_transcript21761/f4p0/763,transcript_HQ_HBZL_transcript21771/f45p0/1001,transcript_HQ_HBZL_transcript20802/f6p0/1168,transcript_HQ_HBZL_transcript19523/f3p0/1299,transcript_HQ_YNLB_transcript12792/f2p0/1865,transcript_HQ_HBZL_transcript21135/f15p0/1165,transcript_HQ_SCEZ_transcript16124/f…
GO:0006787	porphyrin-containing compound catabolic process	biological_process	0.028381	1	37	22033	53	39009	transcript_HQ_HBZL_transcript21257/f3p0/1121,transcript_HQ_YNLB_transcript12182/f14p0/1932,transcript_HQ_HBZL_transcript10350/f5p0/2040,transcript_HQ_YNMLP_transcript19642/f2p0/1256,transcript_HQ_YNMLP_transcript16707/f5p0/1634,transcript_HQ_SCEZ_transcript20358/f3p0/1152,transcript_HQ_HBZL_transcript21534/f2p0/1106,transcript_HQ_SCEZ_transcript17712/f2p0/1423,transcript_HQ_YNLB_transcript15057/f…
GO:0033015	tetrapyrrole catabolic process	biological_process	0.028381	1	37	22033	53	39009	transcript_HQ_YNMLP_transcript17905/f3p0/1484,transcript_HQ_YNMLP_transcript20129/f2p0/1187,transcript_HQ_HBZL_transcript15926/f2p0/1617,transcript_HQ_HBZL_transcript10985/f24p0/1952,transcript_HQ_HBZL_transcript19530/f2p0/1292,transcript_HQ_YNLB_transcript18230/f2p0/1200,transcript_HQ_YNMLP_transcript14724/f7p0/1840,transcript_HQ_YNLB_transcript18204/f2p0/1194,transcript_HQ_YNLB_transcript17110/…
GO:0051187	cofactor catabolic process	biological_process	0.028381	1	37	22033	53	39009	transcript_HQ_YNMLP_transcript14724/f7p0/1840,transcript_HQ_HBZL_transcript19530/f2p0/1292,transcript_HQ_YNLB_transcript18230/f2p0/1200,transcript_HQ_HBZL_transcript15926/f2p0/1617,transcript_HQ_HBZL_transcript10985/f24p0/1952,transcript_HQ_YNMLP_transcript20129/f2p0/1187,transcript_HQ_YNMLP_transcript17905/f3p0/1484,transcript_HQ_HBZL_transcript21913/f6p0/1056,transcript_HQ_HBZL_transcript17340/…
GO:0006030	chitin metabolic process	biological_process	0.02906	1	31	22033	44	39009	transcript_HQ_SCEZ_transcript20883/f2p0/1097,transcript_HQ_YNLB_transcript18014/f5p0/1214,transcript_HQ_SCJY_transcript18439/f2p0/927,transcript_HQ_HBZL_transcript18659/f2p0/1390,transcript_HQ_HBZL_transcript21836/f7p0/1064,transcript_HQ_SCJY_transcript15040/f2p0/1373,transcript_HQ_HBZL_transcript21309/f3p0/1136,transcript_HQ_YNMLP_transcript21439/f7p0/1048,transcript_HQ_YNLB_transcript15878/f7p0…
GO:1901071	glucosamine-containing compound metabolic process	biological_process	0.02906	1	31	22033	44	39009	transcript_HQ_YNMLP_transcript21439/f7p0/1048,transcript_HQ_YNLB_transcript15878/f7p0/1571,transcript_HQ_YNLB_transcript15758/f8p0/1422,transcript_HQ_SCJY_transcript16121/f11p0/1173,transcript_HQ_HBZL_transcript19735/f2p0/1274,transcript_HQ_YNLB_transcript17162/f4p0/1352,transcript_HQ_HBZL_transcript20507/f3p0/1209,transcript_HQ_HBZL_transcript22158/f6p0/1019,transcript_HQ_YNLB_transcript14322/f3…
GO:0098519	nucleotide phosphatase activity, acting on free nucleotides	molecular_function	0.029545	1	98	22033	149	39009	transcript_HQ_YNMLP_transcript22453/f2p0/943,transcript_HQ_YNMLP_transcript16626/f3p0/1609,transcript_HQ_YNMLP_transcript16106/f2p0/1696,transcript_HQ_YNMLP_transcript2251/f3p0/3531,transcript_HQ_YNMLP_transcript1809/f3p0/3763,transcript_HQ_YNMLP_transcript1230/f2p0/3970,transcript_HQ_HBZL_transcript277/f2p0/4817,transcript_HQ_HBZL_transcript205/f3p0/4891,transcript_HQ_YNMLP_transcript5273/f6p0/2…
GO:0006778	porphyrin-containing compound metabolic process	biological_process	0.029656	1	119	22033	187	39009	transcript_HQ_HBZL_transcript16753/f2p0/1549,transcript_HQ_HBZL_transcript9683/f4p0/2046,transcript_HQ_HBZL_transcript17039/f23p0/1528,transcript_HQ_HBZL_transcript21112/f3p0/1139,transcript_HQ_HBZL_transcript17340/f3p0/1506,transcript_HQ_HBZL_transcript8311/f8p0/2193,transcript_HQ_SCJY_transcript13725/f2p0/1528,transcript_HQ_HBZL_transcript19147/f9p0/1364,transcript_HQ_SCJY_transcript11082/f2p0/…
GO:0004611	phosphoenolpyruvate carboxykinase activity	molecular_function	0.030231	1	39	22033	55	39009	transcript_HQ_YNLB_transcript8971/f7p0/2255,transcript_HQ_YNLB_transcript15419/f6p0/1582,transcript_HQ_HBZL_transcript927/f2p0/3847,transcript_HQ_HBZL_transcript1790/f2p0/3349,transcript_HQ_YNLB_transcript2342/f2p0/3370,transcript_HQ_YNLB_transcript116/f2p0/6004,transcript_HQ_HBZL_transcript16392/f3p0/1580,transcript_HQ_YNMLP_transcript6981/f2p0/2759,transcript_HQ_YNLB_transcript7765/f2p0/2389,tr…
GO:0010333	terpene synthase activity	molecular_function	0.03046	1	69	22033	104	39009	transcript_HQ_YNLB_transcript11968/f2p0/1952,transcript_HQ_HBZL_transcript12166/f2p0/1874,transcript_HQ_YNMLP_transcript6130/f8p0/2747,transcript_HQ_HBZL_transcript4171/f10p0/2700,transcript_HQ_HBZL_transcript4530/f3p0/2670,transcript_HQ_YNMLP_transcript6764/f2p0/2711,transcript_HQ_YNMLP_transcript8614/f8p0/2533,transcript_HQ_SCEZ_transcript2137/f3p0/3177,transcript_HQ_YNLB_transcript10743/f2p0/2…
GO:0000184	nuclear-transcribed mRNA catabolic process, nonsense-mediated decay	biological_process	0.030687	1	12	22033	14	39009	transcript_HQ_HBZL_transcript21374/f3p0/1137,transcript_HQ_YNMLP_transcript400/f2p0/4820,transcript_HQ_HBZL_transcript20184/f2p0/1271,transcript_HQ_HBZL_transcript17580/f2p0/1494,transcript_HQ_YNLB_transcript450/f3p0/4631,transcript_HQ_YNLB_transcript22641/f4p0/654,transcript_HQ_YNMLP_transcript19011/f3p0/1375,transcript_HQ_SCJY_transcript83/f3p0/4845,transcript_HQ_YNLB_transcript17767/f3p0/1281,…
GO:0016747	transferase activity, transferring acyl groups other than amino-acyl groups	molecular_function	0.031776	1	255	22033	418	39009	transcript_HQ_HBZL_transcript11145/f2p0/1945,transcript_HQ_YNMLP_transcript19459/f2p0/1277,transcript_HQ_HBZL_transcript10105/f2p0/2029,transcript_HQ_HBZL_transcript9076/f4p0/2113,transcript_HQ_HBZL_transcript10900/f2p0/1977,transcript_HQ_HBZL_transcript20404/f7p0/1219,transcript_HQ_YNLB_transcript9548/f9p0/2206,transcript_HQ_YNLB_transcript6666/f2p0/2525,transcript_HQ_HBZL_transcript21707/f3p0/1…
GO:0005543	phospholipid binding	molecular_function	0.032169	1	115	22033	180	39009	transcript_HQ_YNMLP_transcript18831/f5p0/1334,transcript_HQ_SCJY_transcript9833/f8p0/1986,transcript_HQ_SCJY_transcript1977/f3p0/3018,transcript_HQ_YNMLP_transcript19300/f2p0/1280,transcript_HQ_YNMLP_transcript3613/f6p0/3108,transcript_HQ_YNMLP_transcript1119/f2p0/4025,transcript_HQ_SCJY_transcript22647/f2p0/510,transcript_HQ_HBZL_transcript2897/f7p0/2971,transcript_HQ_HBZL_transcript3732/f3p0/27…
GO:0016973	poly(A)+ mRNA export from nucleus	biological_process	0.032334	1	9	22033	10	39009	transcript_HQ_YNLB_transcript6417/f2p0/2557,transcript_HQ_YNMLP_transcript2801/f2p0/3367,transcript_HQ_YNLB_transcript6270/f2p0/2573,transcript_HQ_SCJY_transcript12432/f3p0/1679,transcript_HQ_HBZL_transcript7275/f2p0/2313,transcript_HQ_YNMLP_transcript6239/f2p0/2767,transcript_HQ_YNMLP_transcript3581/f2p0/3178,transcript_HQ_YNMLP_transcript6751/f3p0/2711,transcript_HQ_YNLB_transcript4200/f2p0/2861
GO:0006464	cellular protein modification process	biological_process	0.033069	1	2360	22033	4041	39009	transcript_HQ_YNLB_transcript10103/f2p0/2140,transcript_HQ_YNLB_transcript14181/f2p0/1719,transcript_HQ_HBZL_transcript7619/f2p0/2249,transcript_HQ_SCEZ_transcript21537/f6p0/1015,transcript_HQ_HBZL_transcript2865/f3p0/2987,transcript_HQ_YNMLP_transcript5617/f2p0/2857,transcript_HQ_HBZL_transcript4485/f2p0/2676,transcript_HQ_SCJY_transcript16375/f3p0/1171,transcript_HQ_HBZL_transcript250/f4p0/4932…
script6842/f5p0/2332,transcript_HQ_HBZL_transcript23352/f2p0/901,transcript_HQ_HBZL_transcript7838/f6p0/2242,transcript_HQ_HBZL_transcript7859/f10p0/2220,transcript_HQ_YNLB_transcript2705/f2p0/3217,transcript_HQ_YNMLP_transcript3224/f2p0/3265,transcript_HQ_YNMLP_transcript9812/f8p0/2353,transcript_HQ_HBZL_transcript895/f2p0/3916,transcript_HQ_YNLB_transcript6274/f5p0/2630,transcript_HQ_YNLB_trans…
75/f2p0/4483,transcript_HQ_HBZL_transcript11138/f27p0/1938,transcript_HQ_HBZL_transcript7629/f3p0/2254,transcript_HQ_YNLB_transcript1265/f2p0/3758,transcript_HQ_YNMLP_transcript16059/f4p0/1663,transcript_HQ_YNLB_transcript16684/f2p0/1421,transcript_HQ_HBZL_transcript3995/f3p0/2731,transcript_HQ_HBZL_transcript10618/f8p0/2059,transcript_HQ_HBZL_transcript9445/f9p0/1987,transcript_HQ_YNLB_transcrip…
L_transcript11181/f2p0/1957,transcript_HQ_HBZL_transcript16314/f7p0/1587,transcript_HQ_HBZL_transcript1904/f2p0/3404,transcript_HQ_YNLB_transcript4318/f2p0/2844,transcript_HQ_HBZL_transcript7635/f2p0/2292,transcript_HQ_YNLB_transcript7041/f6p0/2491,transcript_HQ_SCEZ_transcript21942/f3p0/1013,transcript_HQ_YNLB_transcript3120/f6p0/3099,transcript_HQ_YNMLP_transcript1881/f6p0/3655,transcript_HQ_HB…
GO:0036211	protein modification process	biological_process	0.033069	1	2360	22033	4041	39009	transcript_HQ_HBZL_transcript2232/f2p0/3204,transcript_HQ_HBZL_transcript14755/f6p0/1692,transcript_HQ_YNMLP_transcript11639/f2p0/2233,transcript_HQ_HBZL_transcript5795/f2p0/2461,transcript_HQ_YNMLP_transcript1710/f4p0/3718,transcript_HQ_YNMLP_transcript19241/f2p0/1298,transcript_HQ_HBZL_transcript9101/f2p0/2147,transcript_HQ_YNLB_transcript16022/f3p0/1517,transcript_HQ_HBZL_transcript13484/f4p0/…
/f3p0/4163,transcript_HQ_HBZL_transcript22311/f2p0/1006,transcript_HQ_SCEZ_transcript7540/f2p0/2230,transcript_HQ_YNMLP_transcript5240/f2p0/2904,transcript_HQ_SCJY_transcript4351/f6p0/2653,transcript_HQ_HBZL_transcript3045/f2p0/2926,transcript_HQ_YNMLP_transcript12863/f2p0/2083,transcript_HQ_HBZL_transcript4198/f2p0/2724,transcript_HQ_HBZL_transcript4511/f2p0/2656,transcript_HQ_HBZL_transcript232…
10300/f3p0/2333,transcript_HQ_HBZL_transcript8499/f2p0/2178,transcript_HQ_HBZL_transcript8703/f2p0/2156,transcript_HQ_HBZL_transcript16410/f2p0/1601,transcript_HQ_SCJY_transcript6998/f2p0/2260,transcript_HQ_HBZL_transcript7689/f2p0/2256,transcript_HQ_HBZL_transcript3979/f2p0/2755,transcript_HQ_YNMLP_transcript9507/f2p0/2459,transcript_HQ_YNLB_transcript2202/f2p0/3355,transcript_HQ_HBZL_transcript…
t7906/f12p0/2392,transcript_HQ_YNMLP_transcript6223/f9p0/2775,transcript_HQ_YNLB_transcript10277/f5p0/2144,transcript_HQ_HBZL_transcript8385/f3p0/2186,transcript_HQ_YNLB_transcript14591/f3p0/1712,transcript_HQ_YNMLP_transcript9492/f2p0/2452,transcript_HQ_HBZL_transcript692/f2p0/4053,transcript_HQ_YNMLP_transcript26532/f2p0/528,transcript_HQ_HBZL_transcript7927/f4p0/2229,transcript_HQ_SCJY_transcr…
GO:0042440	pigment metabolic process	biological_process	0.033087	1	112	22033	176	39009	transcript_HQ_YNMLP_transcript14671/f7p0/1876,transcript_HQ_SCJY_transcript11596/f2p0/1770,transcript_HQ_YNMLP_transcript20203/f4p0/1227,transcript_HQ_HBZL_transcript19996/f2p0/1257,transcript_HQ_YNLB_transcript12983/f6p0/1819,transcript_HQ_YNMLP_transcript19123/f2p0/1303,transcript_HQ_SCEZ_transcript19387/f12p0/1245,transcript_HQ_YNMLP_transcript14054/f4p0/1925,transcript_HQ_YNMLP_transcript2668…
GO:0042626	ATPase activity, coupled to transmembrane movement of substances	molecular_function	0.033381	1	111	22033	169	39009	transcript_HQ_YNMLP_transcript216/f5p0/5521,transcript_HQ_YNMLP_transcript306/f8p0/5111,transcript_HQ_SCJY_transcript14902/f3p0/1386,transcript_HQ_YNLB_transcript264/f3p0/5072,transcript_HQ_HBZL_transcript179/f3p0/5197,transcript_HQ_SCEZ_transcript469/f2p0/4227,transcript_HQ_HBZL_transcript26627/f2p0/554,transcript_HQ_SCEZ_transcript2741/f2p0/2950,transcript_HQ_HBZL_transcript283/f5p0/4782,transc…
GO:0043492	ATPase activity, coupled to movement of substances	molecular_function	0.033381	1	111	22033	169	39009	transcript_HQ_YNLB_transcript15967/f3p0/1507,transcript_HQ_HBZL_transcript517/f2p0/4196,transcript_HQ_YNMLP_transcript1215/f5p0/3930,transcript_HQ_YNLB_transcript1816/f2p0/3515,transcript_HQ_HBZL_transcript3485/f6p0/2870,transcript_HQ_HBZL_transcript116/f2p0/5748,transcript_HQ_HBZL_transcript18843/f2p0/1372,transcript_HQ_YNMLP_transcript632/f2p0/4443,transcript_HQ_YNMLP_transcript299/f3p0/5208,tr…
GO:0090305	nucleic acid phosphodiester bond hydrolysis	biological_process	0.034873	1	17	22033	22	39009	transcript_HQ_YNLB_transcript837/f3p0/4104,transcript_HQ_SCJY_transcript3978/f3p0/2631,transcript_HQ_YNMLP_transcript14284/f3p0/1902,transcript_HQ_HBZL_transcript22854/f4p0/954,transcript_HQ_YNMLP_transcript22879/f3p0/914,transcript_HQ_HBZL_transcript14480/f8p0/1718,transcript_HQ_SCEZ_transcript20600/f2p0/1124,transcript_HQ_YNLB_transcript20229/f2p0/919,transcript_HQ_HBZL_transcript21941/f2p0/104…
GO:0005975	carbohydrate metabolic process	biological_process	0.035086	1	1070	22033	1817	39009	transcript_HQ_HBZL_transcript9921/f10p0/2042,transcript_HQ_HBZL_transcript19064/f2p0/1353,transcript_HQ_YNMLP_transcript8795/f2p0/2493,transcript_HQ_HBZL_transcript16862/f2p0/1543,transcript_HQ_SCEZ_transcript12599/f6p0/1811,transcript_HQ_YNMLP_transcript12050/f4p0/2161,transcript_HQ_YNMLP_transcript14183/f3p0/1875,transcript_HQ_YNLB_transcript13672/f3p0/1765,transcript_HQ_HBZL_transcript10896/f3…
HQ_HBZL_transcript17469/f2p0/1498,transcript_HQ_YNMLP_transcript9869/f5p0/2376,transcript_HQ_YNLB_transcript10766/f9p0/2048,transcript_HQ_YNMLP_transcript17043/f6p0/1581,transcript_HQ_HBZL_transcript6422/f9p0/2415,transcript_HQ_YNLB_transcript12277/f4p0/1925,transcript_HQ_YNMLP_transcript1997/f2p0/3617,transcript_HQ_HBZL_transcript7268/f3p0/2267,transcript_HQ_SCJY_transcript1343/f2p0/3254,transcr…
GO:0051186	cofactor metabolic process	biological_process	0.035107	1	401	22033	667	39009	transcript_HQ_HBZL_transcript1649/f7p0/3408,transcript_HQ_YNLB_transcript16310/f9p0/1489,transcript_HQ_YNMLP_transcript3425/f2p0/3232,transcript_HQ_YNMLP_transcript17848/f13p0/1405,transcript_HQ_YNMLP_transcript1809/f3p0/3763,transcript_HQ_HBZL_transcript9441/f2p0/2089,transcript_HQ_SCJY_transcript5029/f3p0/2476,transcript_HQ_HBZL_transcript12433/f3p0/1850,transcript_HQ_YNLB_transcript9731/f2p0/2…
GO:0016820	hydrolase activity, acting on acid anhydrides, catalyzing transmembrane movement of substances	molecular_function	0.035139	1	161	22033	251	39009	transcript_HQ_YNMLP_transcript20255/f3p0/1171,transcript_HQ_YNLB_transcript15952/f6p0/1519,transcript_HQ_YNMLP_transcript17552/f2p0/1509,transcript_HQ_YNMLP_transcript2600/f3p0/3434,transcript_HQ_YNLB_transcript7773/f13p0/2411,transcript_HQ_YNMLP_transcript299/f3p0/5208,transcript_HQ_HBZL_transcript181/f2p0/5186,transcript_HQ_YNLB_transcript255/f2p0/5142,transcript_HQ_YNLB_transcript729/f3p0/4168…
GO:0016787	hydrolase activity	molecular_function	0.03702	1	3460	22033	5985	39009	transcript_HQ_SCEZ_transcript20012/f4p0/1235,transcript_HQ_SCJY_transcript8832/f5p0/2048,transcript_HQ_SCJY_transcript13099/f2p0/1594,transcript_HQ_YNLB_transcript13990/f2p0/1748,transcript_HQ_YNMLP_transcript653/f2p0/4389,transcript_HQ_YNMLP_transcript5303/f3p0/2894,transcript_HQ_YNLB_transcript20267/f2p0/914,transcript_HQ_YNMLP_transcript13537/f2p0/1972,transcript_HQ_HBZL_transcript21454/f4p0/1…
LB_transcript14376/f4p0/1709,transcript_HQ_HBZL_transcript14487/f3p0/1669,transcript_HQ_YNLB_transcript2081/f3p0/3445,transcript_HQ_SCJY_transcript2520/f2p0/2877,transcript_HQ_YNLB_transcript19498/f3p0/1036,transcript_HQ_HBZL_transcript10623/f39p0/1825,transcript_HQ_YNLB_transcript19901/f2p0/963,transcript_HQ_HBZL_transcript10514/f6p0/1998,transcript_HQ_SCJY_transcript8319/f2p0/2111,transcript_HQ…
8/f5p0/3991,transcript_HQ_HBZL_transcript19628/f4p0/1299,transcript_HQ_HBZL_transcript4701/f3p0/2649,transcript_HQ_HBZL_transcript13053/f3p0/1812,transcript_HQ_SCJY_transcript7348/f2p0/2245,transcript_HQ_YNMLP_transcript2545/f2p0/3456,transcript_HQ_HBZL_transcript1774/f2p0/3341,transcript_HQ_YNMLP_transcript6816/f4p0/2638,transcript_HQ_YNLB_transcript2613/f3p0/3240,transcript_HQ_YNMLP_transcript1…
,transcript_HQ_YNMLP_transcript8063/f10p0/2550,transcript_HQ_YNLB_transcript8193/f5p0/2378,transcript_HQ_YNLB_transcript4313/f3p0/2841,transcript_HQ_YNMLP_transcript3105/f3p0/3294,transcript_HQ_HBZL_transcript22284/f7p0/1022,transcript_HQ_YNLB_transcript2372/f6p0/3308,transcript_HQ_HBZL_transcript13394/f13p0/1723,transcript_HQ_HBZL_transcript13944/f10p0/1753,transcript_HQ_YNMLP_transcript19522/f2…
nscript17285/f3p0/1336,transcript_HQ_HBZL_transcript19323/f2p0/1326,transcript_HQ_HBZL_transcript21619/f2p0/1083,transcript_HQ_HBZL_transcript7232/f3p0/2331,transcript_HQ_YNMLP_transcript20404/f2p0/1152,transcript_HQ_HBZL_transcript2590/f3p0/3173,transcript_HQ_YNLB_transcript13125/f2p0/1829,transcript_HQ_YNMLP_transcript19839/f2p0/1216,transcript_HQ_SCJY_transcript4993/f4p0/2486,transcript_HQ_HBZ…
GO:0004620	phospholipase activity	molecular_function	0.037109	1	24	22033	33	39009	transcript_HQ_HBZL_transcript7035/f2p0/2317,transcript_HQ_HBZL_transcript6836/f10p0/2350,transcript_HQ_YNLB_transcript17487/f2p0/1280,transcript_HQ_YNLB_transcript19294/f2p0/1051,transcript_HQ_HBZL_transcript15189/f3p0/1664,transcript_HQ_YNMLP_transcript19989/f6p0/1214,transcript_HQ_HBZL_transcript15610/f2p0/1637,transcript_HQ_YNLB_transcript19521/f2p0/1012,transcript_HQ_YNLB_transcript8977/f6p0/…
GO:0044703	multi-organism reproductive process	biological_process	0.037791	1	97	22033	150	39009	transcript_HQ_HBZL_transcript3553/f3p0/2835,transcript_HQ_YNLB_transcript2029/f5p0/3446,transcript_HQ_YNLB_transcript2649/f2p0/3206,transcript_HQ_YNLB_transcript6431/f8p0/2478,transcript_HQ_YNLB_transcript14104/f2p0/1727,transcript_HQ_HBZL_transcript3695/f43p0/2717,transcript_HQ_YNLB_transcript654/f2p0/4318,transcript_HQ_YNLB_transcript14437/f4p0/1690,transcript_HQ_HBZL_transcript4312/f2p0/2706,t…
GO:0006865	amino acid transport	biological_process	0.037972	1	78	22033	120	39009	transcript_HQ_SCJY_transcript3672/f2p0/2644,transcript_HQ_YNLB_transcript11205/f4p0/2024,transcript_HQ_HBZL_transcript7723/f5p0/2255,transcript_HQ_HBZL_transcript6153/f6p0/2418,transcript_HQ_HBZL_transcript12299/f9p0/1855,transcript_HQ_HBZL_transcript15096/f2p0/1673,transcript_HQ_HBZL_transcript15095/f2p0/1675,transcript_HQ_YNMLP_transcript4056/f2p0/3087,transcript_HQ_YNLB_transcript11037/f3p0/20…
GO:0004568	chitinase activity	molecular_function	0.038011	1	30	22033	43	39009	transcript_HQ_YNLB_transcript15878/f7p0/1571,transcript_HQ_YNMLP_transcript21439/f7p0/1048,transcript_HQ_YNLB_transcript15758/f8p0/1422,transcript_HQ_HBZL_transcript19735/f2p0/1274,transcript_HQ_SCJY_transcript16121/f11p0/1173,transcript_HQ_YNLB_transcript17162/f4p0/1352,transcript_HQ_HBZL_transcript20507/f3p0/1209,transcript_HQ_YNLB_transcript14322/f3p0/1720,transcript_HQ_HBZL_transcript22158/f6…
GO:0006032	chitin catabolic process	biological_process	0.038011	1	30	22033	43	39009	transcript_HQ_HBZL_transcript18659/f2p0/1390,transcript_HQ_HBZL_transcript21836/f7p0/1064,transcript_HQ_SCJY_transcript18439/f2p0/927,transcript_HQ_YNLB_transcript18014/f5p0/1214,transcript_HQ_HBZL_transcript21309/f3p0/1136,transcript_HQ_SCJY_transcript15040/f2p0/1373,transcript_HQ_YNLB_transcript17162/f4p0/1352,transcript_HQ_YNMLP_transcript21439/f7p0/1048,transcript_HQ_YNLB_transcript15878/f7p0…
GO:0046348	amino sugar catabolic process	biological_process	0.038011	1	30	22033	43	39009	transcript_HQ_YNLB_transcript21761/f4p0/763,transcript_HQ_HBZL_transcript20918/f10p0/1164,transcript_HQ_YNLB_transcript16926/f19p0/1360,transcript_HQ_HBZL_transcript21771/f45p0/1001,transcript_HQ_HBZL_transcript20802/f6p0/1168,transcript_HQ_HBZL_transcript20908/f5p0/1155,transcript_HQ_YNLB_transcript12792/f2p0/1865,transcript_HQ_HBZL_transcript21135/f15p0/1165,transcript_HQ_HBZL_transcript20996/f…
GO:1901072	glucosamine-containing compound catabolic process	biological_process	0.038011	1	30	22033	43	39009	transcript_HQ_YNMLP_transcript22648/f7p0/896,transcript_HQ_YNMLP_transcript20502/f7p0/1144,transcript_HQ_YNLB_transcript14322/f3p0/1720,transcript_HQ_HBZL_transcript22158/f6p0/1019,transcript_HQ_HBZL_transcript20507/f3p0/1209,transcript_HQ_YNLB_transcript17162/f4p0/1352,transcript_HQ_YNLB_transcript15758/f8p0/1422,transcript_HQ_SCJY_transcript16121/f11p0/1173,transcript_HQ_HBZL_transcript19735/f2…
GO:0004672	protein kinase activity	molecular_function	0.038347	1	1773	22033	3020	39009	transcript_HQ_YNMLP_transcript13438/f2p0/2000,transcript_HQ_YNMLP_transcript19440/f4p0/1275,transcript_HQ_YNMLP_transcript14641/f3p0/1855,transcript_HQ_YNMLP_transcript12820/f2p0/2055,transcript_HQ_SCJY_transcript8777/f4p0/2054,transcript_HQ_HBZL_transcript8371/f3p0/2177,transcript_HQ_SCJY_transcript3196/f3p0/2763,transcript_HQ_HBZL_transcript10512/f4p0/2000,transcript_HQ_HBZL_transcript9551/f2p0…
0101/f4p0/1250,transcript_HQ_HBZL_transcript9334/f16p0/2109,transcript_HQ_HBZL_transcript6994/f5p0/2337,transcript_HQ_SCJY_transcript4682/f3p0/2530,transcript_HQ_HBZL_transcript1920/f3p0/3281,transcript_HQ_YNLB_transcript15995/f3p0/1499,transcript_HQ_HBZL_transcript9374/f2p0/2105,transcript_HQ_HBZL_transcript17348/f3p0/1509,transcript_HQ_YNLB_transcript10395/f2p0/2176,transcript_HQ_YNMLP_transcri…
671/f3p0/2797,transcript_HQ_HBZL_transcript19457/f2p0/1318,transcript_HQ_HBZL_transcript6206/f5p0/2412,transcript_HQ_SCJY_transcript257/f3p0/4111,transcript_HQ_YNLB_transcript4813/f2p0/2785,transcript_HQ_YNMLP_transcript11237/f2p0/2252,transcript_HQ_YNLB_transcript6548/f2p0/2529,transcript_HQ_HBZL_transcript1762/f3p0/3346,transcript_HQ_YNLB_transcript6640/f3p0/2540,transcript_HQ_HBZL_transcript16…
GO:0016705	oxidoreductase activity, acting on paired donors, with incorporation or reduction of molecular oxygen	molecular_function	0.038429	1	401	22033	669	39009	transcript_HQ_HBZL_transcript15278/f4p0/1661,transcript_HQ_SCJY_transcript12675/f2p0/1657,transcript_HQ_HBZL_transcript13107/f2p0/1807,transcript_HQ_HBZL_transcript13185/f3p0/1819,transcript_HQ_HBZL_transcript11682/f3p0/1928,transcript_HQ_YNLB_transcript14567/f10p0/1665,transcript_HQ_SCJY_transcript825/f2p0/3543,transcript_HQ_YNMLP_transcript4594/f9p0/3007,transcript_HQ_YNLB_transcript15634/f2p0/…
GO:0043168	anion binding	molecular_function	0.039743	1	4071	22033	7015	39009	transcript_HQ_YNMLP_transcript17073/f6p0/1567,transcript_HQ_HBZL_transcript13791/f3p0/1792,transcript_HQ_YNLB_transcript5271/f15p0/2692,transcript_HQ_HBZL_transcript7043/f2p0/2386,transcript_HQ_HBZL_transcript1621/f3p0/3369,transcript_HQ_HBZL_transcript6437/f2p0/2396,transcript_HQ_SCJY_transcript8611/f4p0/2058,transcript_HQ_SCJY_transcript65/f2p0/4853,transcript_HQ_HBZL_transcript716/f2p0/4014,tr…
f19p0/1827,transcript_HQ_YNMLP_transcript21729/f3p0/1005,transcript_HQ_YNMLP_transcript12552/f2p0/2111,transcript_HQ_HBZL_transcript9177/f2p0/2108,transcript_HQ_YNLB_transcript1904/f4p0/3485,transcript_HQ_SCJY_transcript8559/f3p0/2087,transcript_HQ_HBZL_transcript22209/f2p0/999,transcript_HQ_HBZL_transcript21910/f5p0/1047,transcript_HQ_YNMLP_transcript15724/f2p0/1727,transcript_HQ_YNLB_transcript…
anscript1409/f2p0/3713,transcript_HQ_SCJY_transcript5514/f2p0/2429,transcript_HQ_HBZL_transcript19094/f9p0/1334,transcript_HQ_YNMLP_transcript2984/f5p0/3323,transcript_HQ_YNMLP_transcript10758/f2p0/2333,transcript_HQ_SCJY_transcript9019/f2p0/2038,transcript_HQ_YNLB_transcript19593/f5p0/1012,transcript_HQ_HBZL_transcript14960/f2p0/1705,transcript_HQ_YNMLP_transcript6845/f2p0/2699,transcript_HQ_HBZ…
ranscript_HQ_HBZL_transcript5696/f3p0/2476,transcript_HQ_YNMLP_transcript935/f2p0/4122,transcript_HQ_HBZL_transcript7507/f2p0/2278,transcript_HQ_YNLB_transcript3085/f2p0/3092,transcript_HQ_YNLB_transcript18970/f2p0/1097,transcript_HQ_YNMLP_transcript8953/f4p0/2470,transcript_HQ_SCJY_transcript14990/f2p0/1364,transcript_HQ_YNMLP_transcript488/f2p0/4627,transcript_HQ_HBZL_transcript1992/f2p0/3254,t…
4p0/1789,transcript_HQ_HBZL_transcript9101/f2p0/2147,transcript_HQ_HBZL_transcript6838/f2p0/2341,transcript_HQ_YNMLP_transcript10561/f4p0/2315,transcript_HQ_YNLB_transcript9504/f3p0/2267,transcript_HQ_HBZL_transcript6479/f14p0/2380,transcript_HQ_SCJY_transcript2479/f2p0/2891,transcript_HQ_YNMLP_transcript7801/f2p0/2677,transcript_HQ_YNMLP_transcript1809/f3p0/3763,transcript_HQ_HBZL_transcript1269…
cript4123/f14p0/2726,transcript_HQ_YNLB_transcript20210/f3p0/927,transcript_HQ_HBZL_transcript15413/f2p0/1655,transcript_HQ_SCEZ_transcript3415/f2p0/2811,transcript_HQ_YNMLP_transcript12816/f2p0/2066,transcript_HQ_HBZL_transcript4878/f2p0/2592,transcript_HQ_HBZL_transcript3786/f2p0/2854,transcript_HQ_HBZL_transcript15415/f2p0/1659,transcript_HQ_HBZL_transcript3857/f3p0/2774,transcript_HQ_YNMLP_tr…
GO:0033865	nucleoside bisphosphate metabolic process	biological_process	0.039836	1	44	22033	64	39009	transcript_HQ_YNLB_transcript6362/f6p0/2660,transcript_HQ_SCJY_transcript5100/f2p0/2543,transcript_HQ_HBZL_transcript16234/f2p0/1593,transcript_HQ_HBZL_transcript3394/f11p0/2890,transcript_HQ_SCJY_transcript9683/f2p0/1983,transcript_HQ_YNMLP_transcript10511/f7p0/2315,transcript_HQ_SCJY_transcript10032/f2p0/1958,transcript_HQ_HBZL_transcript1560/f5p0/3438,transcript_HQ_SCJY_transcript7038/f8p0/225…
GO:0033875	ribonucleoside bisphosphate metabolic process	biological_process	0.039836	1	44	22033	64	39009	transcript_HQ_SCJY_transcript9683/f2p0/1983,transcript_HQ_YNLB_transcript6362/f6p0/2660,transcript_HQ_SCJY_transcript5100/f2p0/2543,transcript_HQ_HBZL_transcript3394/f11p0/2890,transcript_HQ_HBZL_transcript16234/f2p0/1593,transcript_HQ_SCJY_transcript10032/f2p0/1958,transcript_HQ_YNMLP_transcript10511/f7p0/2315,transcript_HQ_YNMLP_transcript17578/f2p0/1517,transcript_HQ_HBZL_transcript1408/f2p0/3…
GO:0034032	purine nucleoside bisphosphate metabolic process	biological_process	0.039836	1	44	22033	64	39009	transcript_HQ_YNMLP_transcript17578/f2p0/1517,transcript_HQ_HBZL_transcript1408/f2p0/3511,transcript_HQ_HBZL_transcript1409/f2p0/3514,transcript_HQ_HBZL_transcript1560/f5p0/3438,transcript_HQ_SCJY_transcript7038/f8p0/2258,transcript_HQ_SCEZ_transcript10998/f9p0/1915,transcript_HQ_YNMLP_transcript3476/f2p0/3222,transcript_HQ_YNLB_transcript2648/f3p0/3228,transcript_HQ_HBZL_transcript5403/f2p0/2533…
GO:0002949	tRNA threonylcarbamoyladenosine modification	biological_process	0.040016	1	158	22033	252	39009	transcript_HQ_SCJY_transcript4993/f4p0/2486,transcript_HQ_YNMLP_transcript17425/f5p0/1573,transcript_HQ_YNMLP_transcript7602/f5p0/2610,transcript_HQ_YNLB_transcript1782/f2p0/3521,transcript_HQ_YNLB_transcript2410/f2p0/3309,transcript_HQ_SCJY_transcript12626/f2p0/1634,transcript_HQ_HBZL_transcript23208/f3p0/913,transcript_HQ_HBZL_transcript2359/f21p0/3118,transcript_HQ_HBZL_transcript658/f3p0/4054…
GO:0070525	tRNA threonylcarbamoyladenosine metabolic process	biological_process	0.040016	1	158	22033	252	39009	transcript_HQ_HBZL_transcript2557/f2p0/3065,transcript_HQ_YNMLP_transcript16243/f3p0/1696,transcript_HQ_YNMLP_transcript5109/f4p0/2915,transcript_HQ_YNMLP_transcript9623/f2p0/2434,transcript_HQ_HBZL_transcript4129/f2p0/2718,transcript_HQ_YNMLP_transcript2251/f3p0/3531,transcript_HQ_HBZL_transcript16258/f6p0/1592,transcript_HQ_HBZL_transcript6712/f2p0/2363,transcript_HQ_HBZL_transcript16869/f5p0/1…
GO:0010628	positive regulation of gene expression	biological_process	0.040049	1	42	22033	62	39009	transcript_HQ_SCJY_transcript669/f2p0/3649,transcript_HQ_HBZL_transcript9005/f2p0/2142,transcript_HQ_HBZL_transcript20131/f2p0/1241,transcript_HQ_YNMLP_transcript13454/f2p0/2016,transcript_HQ_YNMLP_transcript2783/f6p0/3378,transcript_HQ_HBZL_transcript789/f6p0/3894,transcript_HQ_YNLB_transcript11849/f2p0/1964,transcript_HQ_YNLB_transcript641/f5p0/4263,transcript_HQ_SCJY_transcript18312/f6p0/929,t…
GO:0007617	mating behavior	biological_process	0.0409	1	6	22033	6	39009	transcript_HQ_YNLB_transcript282/f4p0/5019,transcript_HQ_YNLB_transcript3658/f4p0/2951,transcript_HQ_HBZL_transcript2652/f9p0/3063,transcript_HQ_SCJY_transcript7047/f2p0/2390,transcript_HQ_YNLB_transcript654/f2p0/4318,transcript_HQ_YNMLP_transcript4024/f6p0/3110
GO:0007618	mating	biological_process	0.0409	1	6	22033	6	39009	transcript_HQ_HBZL_transcript2652/f9p0/3063,transcript_HQ_YNLB_transcript3658/f4p0/2951,transcript_HQ_YNMLP_transcript4024/f6p0/3110,transcript_HQ_YNLB_transcript654/f2p0/4318,transcript_HQ_SCJY_transcript7047/f2p0/2390,transcript_HQ_YNLB_transcript282/f4p0/5019
GO:0019098	reproductive behavior	biological_process	0.0409	1	6	22033	6	39009	transcript_HQ_YNLB_transcript282/f4p0/5019,transcript_HQ_YNLB_transcript3658/f4p0/2951,transcript_HQ_HBZL_transcript2652/f9p0/3063,transcript_HQ_YNLB_transcript654/f2p0/4318,transcript_HQ_SCJY_transcript7047/f2p0/2390,transcript_HQ_YNMLP_transcript4024/f6p0/3110
GO:0044705	multi-organism reproductive behavior	biological_process	0.0409	1	6	22033	6	39009	transcript_HQ_SCJY_transcript7047/f2p0/2390,transcript_HQ_YNLB_transcript654/f2p0/4318,transcript_HQ_YNMLP_transcript4024/f6p0/3110,transcript_HQ_YNLB_transcript3658/f4p0/2951,transcript_HQ_HBZL_transcript2652/f9p0/3063,transcript_HQ_YNLB_transcript282/f4p0/5019
GO:0051705	multi-organism behavior	biological_process	0.0409	1	6	22033	6	39009	transcript_HQ_YNLB_transcript282/f4p0/5019,transcript_HQ_YNLB_transcript3658/f4p0/2951,transcript_HQ_HBZL_transcript2652/f9p0/3063,transcript_HQ_YNLB_transcript654/f2p0/4318,transcript_HQ_SCJY_transcript7047/f2p0/2390,transcript_HQ_YNMLP_transcript4024/f6p0/3110
GO:0009678	hydrogen-translocating pyrophosphatase activity	molecular_function	0.041278	1	21	22033	28	39009	transcript_HQ_YNLB_transcript4936/f5p0/2761,transcript_HQ_YNLB_transcript5549/f2p0/2707,transcript_HQ_SCEZ_transcript3024/f2p0/2864,transcript_HQ_HBZL_transcript3181/f4p0/2923,transcript_HQ_HBZL_transcript4262/f7p0/2693,transcript_HQ_SCJY_transcript4804/f2p0/2521,transcript_HQ_YNLB_transcript8589/f2p0/2277,transcript_HQ_HBZL_transcript19697/f3p0/1285,transcript_HQ_YNLB_transcript4541/f2p0/2797,tr…
GO:0006825	copper ion transport	biological_process	0.04144	1	15	22033	20	39009	transcript_HQ_SCJY_transcript20682/f9p0/694,transcript_HQ_SCJY_transcript21538/f3p0/574,transcript_HQ_YNLB_transcript20923/f2p0/848,transcript_HQ_SCJY_transcript21231/f4p0/583,transcript_HQ_HBZL_transcript25881/f2p0/639,transcript_HQ_HBZL_transcript22783/f3p0/952,transcript_HQ_YNMLP_transcript26020/f4p0/576,transcript_HQ_HBZL_transcript28220/f2p0/393,transcript_HQ_YNMLP_transcript24628/f4p0/728,t…
GO:0051213	dioxygenase activity	molecular_function	0.041886	1	100	22033	156	39009	transcript_HQ_YNMLP_transcript4241/f2p0/3062,transcript_HQ_SCJY_transcript2023/f4p0/2999,transcript_HQ_HBZL_transcript110/f2p0/5903,transcript_HQ_YNLB_transcript17176/f3p0/1325,transcript_HQ_HBZL_transcript19560/f2p0/1334,transcript_HQ_YNMLP_transcript13125/f3p0/2022,transcript_HQ_SCJY_transcript15619/f2p0/1275,transcript_HQ_SCJY_transcript5960/f2p0/2423,transcript_HQ_YNLB_transcript3523/f3p0/300…
GO:1901575	organic substance catabolic process	biological_process	0.041947	1	580	22033	983	39009	transcript_HQ_YNLB_transcript8810/f2p0/2299,transcript_HQ_YNLB_transcript14038/f3p0/1781,transcript_HQ_YNLB_transcript6689/f3p0/2525,transcript_HQ_YNLB_transcript15715/f2p0/1543,transcript_HQ_YNMLP_transcript17074/f3p0/1574,transcript_HQ_HBZL_transcript1734/f9p0/3344,transcript_HQ_HBZL_transcript21013/f2p0/1149,transcript_HQ_HBZL_transcript20996/f7p0/1152,transcript_HQ_YNMLP_transcript9303/f2p0/2…
GO:0007154	cell communication	biological_process	0.042161	1	1117	22033	1912	39009	transcript_HQ_YNMLP_transcript7732/f2p0/2599,transcript_HQ_YNMLP_transcript12416/f2p0/2104,transcript_HQ_YNMLP_transcript12436/f2p0/2112,transcript_HQ_HBZL_transcript18869/f3p0/1372,transcript_HQ_HBZL_transcript21453/f2p0/1138,transcript_HQ_YNMLP_transcript17706/f6p0/1527,transcript_HQ_HBZL_transcript5509/f2p0/2517,transcript_HQ_SCJY_transcript4725/f2p0/2571,transcript_HQ_HBZL_transcript5659/f4p0…
792,transcript_HQ_SCJY_transcript19521/f10p0/787,transcript_HQ_HBZL_transcript21099/f3p0/1151,transcript_HQ_YNMLP_transcript1403/f2p0/3848,transcript_HQ_YNMLP_transcript11377/f4p0/2225,transcript_HQ_HBZL_transcript9141/f2p0/2130,transcript_HQ_HBZL_transcript482/f2p0/4283,transcript_HQ_SCJY_transcript10032/f2p0/1958,transcript_HQ_HBZL_transcript8892/f4p0/2136,transcript_HQ_HBZL_transcript13954/f5p…
GO:0051726	regulation of cell cycle	biological_process	0.043638	1	61	22033	94	39009	transcript_HQ_SCJY_transcript10115/f5p0/1922,transcript_HQ_HBZL_transcript7062/f2p0/2323,transcript_HQ_YNLB_transcript20123/f2p0/941,transcript_HQ_YNMLP_transcript23841/f7p0/790,transcript_HQ_HBZL_transcript24395/f12p0/745,transcript_HQ_HBZL_transcript25000/f4p0/711,transcript_HQ_YNLB_transcript21488/f2p0/816,transcript_HQ_YNMLP_transcript24577/f2p0/721,transcript_HQ_HBZL_transcript27398/f4p0/493…
GO:0031012	extracellular matrix	cellular_component	0.043814	1	204	22033	338	39009	transcript_HQ_YNMLP_transcript24420/f5p0/755,transcript_HQ_HBZL_transcript19202/f3p0/1341,transcript_HQ_YNMLP_transcript11858/f2p0/2189,transcript_HQ_SCJY_transcript20038/f4p0/771,transcript_HQ_HBZL_transcript5306/f16p0/2538,transcript_HQ_YNLB_transcript9723/f2p0/2188,transcript_HQ_HBZL_transcript26033/f2p0/619,transcript_HQ_HBZL_transcript9374/f2p0/2105,transcript_HQ_YNLB_transcript8299/f2p0/234…
GO:0042330	taxis	biological_process	0.044431	1	12	22033	15	39009	transcript_HQ_YNLB_transcript2754/f3p0/3209,transcript_HQ_HBZL_transcript2318/f2p0/3171,transcript_HQ_HBZL_transcript4751/f3p0/2597,transcript_HQ_YNMLP_transcript17865/f8p0/1499,transcript_HQ_YNMLP_transcript17551/f2p0/1515,transcript_HQ_YNLB_transcript14872/f2p0/1647,transcript_HQ_HBZL_transcript9435/f2p0/2101,transcript_HQ_YNLB_transcript15010/f2p0/1639,transcript_HQ_YNMLP_transcript17363/f7p0/…
GO:0033013	tetrapyrrole metabolic process	biological_process	0.045129	1	172	22033	279	39009	transcript_HQ_HBZL_transcript8920/f2p0/2141,transcript_HQ_YNLB_transcript12136/f8p0/1934,transcript_HQ_HBZL_transcript19935/f4p0/1264,transcript_HQ_SCJY_transcript14533/f2p0/1420,transcript_HQ_HBZL_transcript11143/f3p0/1945,transcript_HQ_HBZL_transcript14058/f2p0/1758,transcript_HQ_HBZL_transcript8396/f2p0/2230,transcript_HQ_HBZL_transcript2205/f7p0/3193,transcript_HQ_SCJY_transcript11112/f3p0/18…
GO:0016838	carbon-oxygen lyase activity, acting on phosphates	molecular_function	0.045434	1	79	22033	122	39009	transcript_HQ_HBZL_transcript10936/f2p0/1962,transcript_HQ_HBZL_transcript5449/f3p0/2510,transcript_HQ_YNMLP_transcript7105/f3p0/2665,transcript_HQ_SCJY_transcript3709/f3p0/2676,transcript_HQ_HBZL_transcript4148/f35p0/2682,transcript_HQ_HBZL_transcript3482/f12p0/2806,transcript_HQ_HBZL_transcript4404/f3p0/2666,transcript_HQ_HBZL_transcript4191/f3p0/2700,transcript_HQ_YNMLP_transcript6130/f8p0/274…
GO:0032270	positive regulation of cellular protein metabolic process	biological_process	0.045575	1	19	22033	26	39009	transcript_HQ_YNMLP_transcript21956/f3p0/985,transcript_HQ_YNLB_transcript20482/f3p0/947,transcript_HQ_YNMLP_transcript21786/f5p0/1005,transcript_HQ_YNLB_transcript20555/f12p0/880,transcript_HQ_HBZL_transcript1925/f2p0/3331,transcript_HQ_YNMLP_transcript27424/f2p0/436,transcript_HQ_HBZL_transcript23177/f5p0/895,transcript_HQ_HBZL_transcript21423/f8p0/1101,transcript_HQ_HBZL_transcript3649/f2p0/28…
GO:0051247	positive regulation of protein metabolic process	biological_process	0.045575	1	19	22033	26	39009	transcript_HQ_YNLB_transcript19327/f3p0/1038,transcript_HQ_YNMLP_transcript3606/f2p0/3300,transcript_HQ_HBZL_transcript23147/f12p0/906,transcript_HQ_SCJY_transcript18312/f6p0/929,transcript_HQ_HBZL_transcript21835/f2p0/1077,transcript_HQ_HBZL_transcript3649/f2p0/2802,transcript_HQ_YNMLP_transcript23040/f8p0/894,transcript_HQ_HBZL_transcript3400/f2p0/2888,transcript_HQ_YNLB_transcript20540/f8p0/89…
GO:0030173	integral component of Golgi membrane	cellular_component	0.045635	1	25	22033	35	39009	transcript_HQ_YNMLP_transcript20317/f2p0/1160,transcript_HQ_YNLB_transcript19164/f2p0/1060,transcript_HQ_HBZL_transcript11521/f2p0/1943,transcript_HQ_HBZL_transcript11307/f13p0/1942,transcript_HQ_YNLB_transcript20989/f2p0/835,transcript_HQ_SCJY_transcript14485/f2p0/1455,transcript_HQ_SCJY_transcript19406/f2p0/811,transcript_HQ_HBZL_transcript19349/f2p0/1335,transcript_HQ_YNMLP_transcript4011/f2p0…
GO:0031228	intrinsic component of Golgi membrane	cellular_component	0.045635	1	25	22033	35	39009	transcript_HQ_HBZL_transcript11307/f13p0/1942,transcript_HQ_HBZL_transcript11521/f2p0/1943,transcript_HQ_YNLB_transcript19164/f2p0/1060,transcript_HQ_YNMLP_transcript20317/f2p0/1160,transcript_HQ_YNLB_transcript18699/f2p0/1170,transcript_HQ_YNMLP_transcript4011/f2p0/3136,transcript_HQ_SCJY_transcript3681/f2p0/2673,transcript_HQ_HBZL_transcript19349/f2p0/1335,transcript_HQ_SCJY_transcript19406/f2p…
GO:0004332	fructose-bisphosphate aldolase activity	molecular_function	0.046597	1	23	22033	32	39009	transcript_HQ_HBZL_transcript20271/f2p0/1209,transcript_HQ_HBZL_transcript18491/f3p0/1419,transcript_HQ_YNLB_transcript18509/f4p0/1155,transcript_HQ_SCJY_transcript13727/f6p0/1532,transcript_HQ_YNLB_transcript15715/f2p0/1543,transcript_HQ_YNMLP_transcript17647/f2p0/1507,transcript_HQ_HBZL_transcript17987/f17p0/1443,transcript_HQ_YNLB_transcript16847/f2p0/1435,transcript_HQ_YNLB_transcript16310/f9…
GO:0016773	phosphotransferase activity, alcohol group as acceptor	molecular_function	0.047966	1	2084	22033	3565	39009	transcript_HQ_HBZL_transcript11173/f6p0/1951,transcript_HQ_YNLB_transcript652/f2p0/4283,transcript_HQ_YNMLP_transcript1400/f10p0/3839,transcript_HQ_HBZL_transcript6488/f3p0/2393,transcript_HQ_HBZL_transcript7019/f3p0/2328,transcript_HQ_HBZL_transcript17595/f2p0/1485,transcript_HQ_YNLB_transcript9428/f2p0/2218,transcript_HQ_HBZL_transcript1266/f2p0/3571,transcript_HQ_HBZL_transcript8538/f12p0/2166…
transcript8756/f2p0/2158,transcript_HQ_YNMLP_transcript284/f2p0/5214,transcript_HQ_YNMLP_transcript12850/f2p0/2059,transcript_HQ_HBZL_transcript12579/f6p0/1862,transcript_HQ_SCEZ_transcript3987/f2p0/2712,transcript_HQ_HBZL_transcript17196/f15p0/1503,transcript_HQ_YNMLP_transcript8748/f3p0/2485,transcript_HQ_YNLB_transcript9203/f2p0/2241,transcript_HQ_SCJY_transcript8777/f4p0/2054,transcript_HQ_HB…
3216,transcript_HQ_HBZL_transcript3192/f2p0/2904,transcript_HQ_SCJY_transcript11018/f2p0/1824,transcript_HQ_YNMLP_transcript12192/f2p0/2136,transcript_HQ_HBZL_transcript8201/f5p0/2200,transcript_HQ_YNMLP_transcript9280/f2p0/2465,transcript_HQ_HBZL_transcript1654/f6p0/3411,transcript_HQ_YNMLP_transcript11412/f3p0/2217,transcript_HQ_HBZL_transcript2546/f5p0/3095,transcript_HQ_YNLB_transcript13573/f…
GO:0009891	positive regulation of biosynthetic process	biological_process	0.048968	1	41	22033	61	39009	transcript_HQ_HBZL_transcript16738/f2p0/1555,transcript_HQ_YNLB_transcript20482/f3p0/947,transcript_HQ_YNMLP_transcript21956/f3p0/985,transcript_HQ_YNLB_transcript11849/f2p0/1964,transcript_HQ_HBZL_transcript789/f6p0/3894,transcript_HQ_YNMLP_transcript19403/f2p0/1256,transcript_HQ_HBZL_transcript23147/f12p0/906,transcript_HQ_SCJY_transcript18312/f6p0/929,transcript_HQ_YNLB_transcript641/f5p0/4263…
GO:0010557	positive regulation of macromolecule biosynthetic process	biological_process	0.048968	1	41	22033	61	39009	transcript_HQ_HBZL_transcript17167/f9p0/1513,transcript_HQ_HBZL_transcript3699/f4p0/2815,transcript_HQ_YNMLP_transcript23040/f8p0/894,transcript_HQ_HBZL_transcript2042/f3p0/3245,transcript_HQ_YNLB_transcript18109/f2p0/1225,transcript_HQ_HBZL_transcript3502/f2p0/2839,transcript_HQ_YNMLP_transcript21819/f2p0/996,transcript_HQ_HBZL_transcript5471/f2p0/2514,transcript_HQ_SCJY_transcript669/f2p0/3649,…
GO:0031328	positive regulation of cellular biosynthetic process	biological_process	0.048968	1	41	22033	61	39009	transcript_HQ_YNMLP_transcript21819/f2p0/996,transcript_HQ_HBZL_transcript5471/f2p0/2514,transcript_HQ_YNLB_transcript18109/f2p0/1225,transcript_HQ_YNMLP_transcript23040/f8p0/894,transcript_HQ_HBZL_transcript2042/f3p0/3245,transcript_HQ_HBZL_transcript3502/f2p0/2839,transcript_HQ_HBZL_transcript17167/f9p0/1513,transcript_HQ_HBZL_transcript3699/f4p0/2815,transcript_HQ_HBZL_transcript23147/f12p0/90…
GO:0051173	positive regulation of nitrogen compound metabolic process	biological_process	0.048968	1	41	22033	61	39009	transcript_HQ_SCJY_transcript669/f2p0/3649,transcript_HQ_HBZL_transcript9005/f2p0/2142,transcript_HQ_HBZL_transcript20131/f2p0/1241,transcript_HQ_YNMLP_transcript13454/f2p0/2016,transcript_HQ_HBZL_transcript789/f6p0/3894,transcript_HQ_YNLB_transcript11849/f2p0/1964,transcript_HQ_SCJY_transcript18312/f6p0/929,transcript_HQ_YNLB_transcript641/f5p0/4263,transcript_HQ_YNMLP_transcript19403/f2p0/1256,…
GO:0008430	selenium binding	molecular_function	0.049017	1	16	22033	21	39009	transcript_HQ_HBZL_transcript7966/f2p0/2221,transcript_HQ_YNMLP_transcript22484/f3p0/941,transcript_HQ_SCEZ_transcript13986/f10p0/1723,transcript_HQ_SCJY_transcript12065/f2p0/1724,transcript_HQ_YNMLP_transcript591/f4p0/4430,transcript_HQ_HBZL_transcript12032/f6p0/1929,transcript_HQ_YNMLP_transcript15805/f3p0/1748,transcript_HQ_HBZL_transcript25139/f3p0/747,transcript_HQ_YNLB_transcript23708/f2p0/…
GO:0010181	FMN binding	molecular_function	0.049484	1	82	22033	129	39009	transcript_HQ_YNLB_transcript9452/f4p0/2210,transcript_HQ_HBZL_transcript5060/f9p0/2597,transcript_HQ_YNLB_transcript5021/f8p0/2717,transcript_HQ_YNMLP_transcript13718/f4p0/1956,transcript_HQ_YNMLP_transcript18171/f2p0/1429,transcript_HQ_YNMLP_transcript5702/f2p0/2826,transcript_HQ_HBZL_transcript15312/f2p0/1663,transcript_HQ_HBZL_transcript2485/f4p0/3096,transcript_HQ_YNLB_transcript23939/f2p0/5…
GO:0051537	2 iron, 2 sulfur cluster binding	molecular_function	0.050158	1	23	22033	32	39009	transcript_HQ_HBZL_transcript11518/f15p0/1906,transcript_HQ_HBZL_transcript9199/f3p0/2123,transcript_HQ_YNLB_transcript17375/f5p0/1298,transcript_HQ_YNLB_transcript17661/f12p0/1286,transcript_HQ_YNMLP_transcript14809/f3p0/1877,transcript_HQ_YNLB_transcript18411/f2p0/1149,transcript_HQ_YNMLP_transcript9186/f4p0/2443,transcript_HQ_YNLB_transcript10641/f18p0/1862,transcript_HQ_HBZL_transcript16545/f…
GO:0016010	dystrophin-associated glycoprotein complex	cellular_component	0.050593	1	16	22033	21	39009	transcript_HQ_HBZL_transcript10679/f2p0/2023,transcript_HQ_HBZL_transcript8693/f9p0/2171,transcript_HQ_HBZL_transcript7145/f4p0/2309,transcript_HQ_HBZL_transcript6509/f2p0/2379,transcript_HQ_YNLB_transcript4972/f3p0/2741,transcript_HQ_HBZL_transcript8195/f2p0/2201,transcript_HQ_HBZL_transcript21617/f4p0/1085,transcript_HQ_HBZL_transcript6462/f2p0/2266,transcript_HQ_HBZL_transcript22248/f5p0/966,t…
GO:0003872	6-phosphofructokinase activity	molecular_function	0.050908	1	37	22033	54	39009	transcript_HQ_YNMLP_transcript8394/f2p0/2541,transcript_HQ_HBZL_transcript9338/f4p0/2104,transcript_HQ_SCJY_transcript7951/f12p0/2157,transcript_HQ_YNMLP_transcript8544/f2p0/2437,transcript_HQ_YNLB_transcript9827/f4p0/2205,transcript_HQ_YNMLP_transcript8320/f2p0/2556,transcript_HQ_YNMLP_transcript12232/f2p0/2136,transcript_HQ_SCJY_transcript7861/f7p0/2175,transcript_HQ_YNLB_transcript5383/f3p0/26…
GO:0016831	carboxy-lyase activity	molecular_function	0.051053	1	157	22033	254	39009	transcript_HQ_HBZL_transcript11347/f2p0/1950,transcript_HQ_YNMLP_transcript22696/f3p0/931,transcript_HQ_HBZL_transcript13418/f12p0/1782,transcript_HQ_HBZL_transcript19661/f5p0/1313,transcript_HQ_HBZL_transcript16559/f16p0/1577,transcript_HQ_HBZL_transcript5880/f2p0/2469,transcript_HQ_YNMLP_transcript16451/f10p0/1642,transcript_HQ_YNMLP_transcript12730/f2p0/1971,transcript_HQ_SCJY_transcript15239/…
GO:0004096	catalase activity	molecular_function	0.051586	1	10	22033	12	39009	transcript_HQ_SCJY_transcript9751/f2p0/1959,transcript_HQ_YNLB_transcript12941/f3p0/1866,transcript_HQ_HBZL_transcript11570/f4p0/1928,transcript_HQ_YNMLP_transcript14714/f9p0/1859,transcript_HQ_YNLB_transcript12686/f2p0/1905,transcript_HQ_HBZL_transcript13026/f13p0/1815,transcript_HQ_HBZL_transcript11607/f2p0/1907,transcript_HQ_SCJY_transcript10485/f24p0/1863,transcript_HQ_HBZL_transcript7539/f3p…
GO:0001932	regulation of protein phosphorylation	biological_process	0.052512	1	10	22033	12	39009	transcript_HQ_HBZL_transcript315/f2p0/4645,transcript_HQ_HBZL_transcript21002/f2p0/1143,transcript_HQ_YNMLP_transcript3606/f2p0/3300,transcript_HQ_HBZL_transcript21423/f8p0/1101,transcript_HQ_HBZL_transcript22396/f2p0/1018,transcript_HQ_HBZL_transcript3400/f2p0/2888,transcript_HQ_HBZL_transcript3649/f2p0/2802,transcript_HQ_YNLB_transcript19306/f2p0/1047,transcript_HQ_HBZL_transcript1925/f2p0/3331…
GO:0031412	gas vesicle organization	biological_process	0.05255	1	12	22033	15	39009	transcript_HQ_YNMLP_transcript2458/f4p0/3483,transcript_HQ_HBZL_transcript23006/f3p0/925,transcript_HQ_YNMLP_transcript1232/f2p0/3884,transcript_HQ_HBZL_transcript18926/f2p0/1368,transcript_HQ_YNLB_transcript1974/f8p0/3472,transcript_HQ_HBZL_transcript1561/f15p0/3426,transcript_HQ_YNLB_transcript23555/f2p0/552,transcript_HQ_YNMLP_transcript2412/f2p0/3496,transcript_HQ_HBZL_transcript12976/f5p0/18…
GO:0007530	sex determination	biological_process	0.054663	1	5	22033	5	39009	transcript_HQ_YNMLP_transcript21819/f2p0/996,transcript_HQ_HBZL_transcript461/f2p0/4294,transcript_HQ_HBZL_transcript25728/f2p0/647,transcript_HQ_HBZL_transcript20761/f5p0/1183,transcript_HQ_HBZL_transcript8889/f2p0/2139
GO:0007531	mating type determination	biological_process	0.054663	1	5	22033	5	39009	transcript_HQ_HBZL_transcript461/f2p0/4294,transcript_HQ_YNMLP_transcript21819/f2p0/996,transcript_HQ_HBZL_transcript25728/f2p0/647,transcript_HQ_HBZL_transcript8889/f2p0/2139,transcript_HQ_HBZL_transcript20761/f5p0/1183
GO:0045165	cell fate commitment	biological_process	0.054663	1	5	22033	5	39009	transcript_HQ_HBZL_transcript461/f2p0/4294,transcript_HQ_YNMLP_transcript21819/f2p0/996,transcript_HQ_HBZL_transcript25728/f2p0/647,transcript_HQ_HBZL_transcript8889/f2p0/2139,transcript_HQ_HBZL_transcript20761/f5p0/1183
GO:0016829	lyase activity	molecular_function	0.054901	1	492	22033	831	39009	transcript_HQ_HBZL_transcript9067/f3p0/2129,transcript_HQ_HBZL_transcript17165/f2p0/1505,transcript_HQ_HBZL_transcript12614/f21p0/1841,transcript_HQ_YNMLP_transcript12765/f7p0/2089,transcript_HQ_HBZL_transcript9619/f2p0/2096,transcript_HQ_HBZL_transcript15568/f2p0/1632,transcript_HQ_YNLB_transcript13513/f2p0/1793,transcript_HQ_YNMLP_transcript23042/f4p0/829,transcript_HQ_HBZL_transcript17886/f2p0…
GO:0001558	regulation of cell growth	biological_process	0.055085	1	14	22033	18	39009	transcript_HQ_HBZL_transcript5096/f3p0/2562,transcript_HQ_HBZL_transcript2677/f2p0/3059,transcript_HQ_HBZL_transcript7890/f4p0/2252,transcript_HQ_YNLB_transcript8439/f2p0/2298,transcript_HQ_YNLB_transcript12900/f2p0/1846,transcript_HQ_YNMLP_transcript10638/f3p0/2299,transcript_HQ_HBZL_transcript6770/f4p0/2361,transcript_HQ_HBZL_transcript6940/f6p0/2335,transcript_HQ_YNMLP_transcript8826/f2p0/2485…
GO:0005520	insulin-like growth factor binding	molecular_function	0.055085	1	14	22033	18	39009	transcript_HQ_HBZL_transcript6940/f6p0/2335,transcript_HQ_HBZL_transcript6770/f4p0/2361,transcript_HQ_YNMLP_transcript8826/f2p0/2485,transcript_HQ_YNLB_transcript8439/f2p0/2298,transcript_HQ_YNLB_transcript12900/f2p0/1846,transcript_HQ_YNMLP_transcript10638/f3p0/2299,transcript_HQ_HBZL_transcript2677/f2p0/3059,transcript_HQ_HBZL_transcript7890/f4p0/2252,transcript_HQ_HBZL_transcript5096/f3p0/2562…
GO:0019838	growth factor binding	molecular_function	0.055085	1	14	22033	18	39009	transcript_HQ_HBZL_transcript5096/f3p0/2562,transcript_HQ_HBZL_transcript2677/f2p0/3059,transcript_HQ_HBZL_transcript7890/f4p0/2252,transcript_HQ_YNLB_transcript12900/f2p0/1846,transcript_HQ_YNLB_transcript8439/f2p0/2298,transcript_HQ_YNMLP_transcript10638/f3p0/2299,transcript_HQ_HBZL_transcript6940/f6p0/2335,transcript_HQ_HBZL_transcript6770/f4p0/2361,transcript_HQ_YNMLP_transcript8826/f2p0/2485…
GO:0009967	positive regulation of signal transduction	biological_process	0.055143	1	14	22033	18	39009	transcript_HQ_HBZL_transcript3400/f2p0/2888,transcript_HQ_HBZL_transcript3649/f2p0/2802,transcript_HQ_YNLB_transcript10385/f2p0/2116,transcript_HQ_HBZL_transcript11702/f2p0/1911,transcript_HQ_YNLB_transcript1245/f2p0/3796,transcript_HQ_SCJY_transcript7658/f2p0/2217,transcript_HQ_HBZL_transcript15767/f2p0/1683,transcript_HQ_YNMLP_transcript1287/f4p0/3905,transcript_HQ_HBZL_transcript6823/f3p0/2348…
GO:0010647	positive regulation of cell communication	biological_process	0.055143	1	14	22033	18	39009	transcript_HQ_HBZL_transcript15767/f2p0/1683,transcript_HQ_YNMLP_transcript1287/f4p0/3905,transcript_HQ_HBZL_transcript1324/f2p0/3564,transcript_HQ_HBZL_transcript6823/f3p0/2348,transcript_HQ_SCEZ_transcript25161/f2p0/640,transcript_HQ_SCEZ_transcript22019/f2p0/976,transcript_HQ_HBZL_transcript3415/f2p0/2847,transcript_HQ_HBZL_transcript8284/f7p0/2189,transcript_HQ_HBZL_transcript3400/f2p0/2888,t…
GO:0023056	positive regulation of signaling	biological_process	0.055143	1	14	22033	18	39009	transcript_HQ_HBZL_transcript1324/f2p0/3564,transcript_HQ_HBZL_transcript6823/f3p0/2348,transcript_HQ_YNMLP_transcript1287/f4p0/3905,transcript_HQ_HBZL_transcript15767/f2p0/1683,transcript_HQ_HBZL_transcript8284/f7p0/2189,transcript_HQ_SCEZ_transcript22019/f2p0/976,transcript_HQ_SCEZ_transcript25161/f2p0/640,transcript_HQ_HBZL_transcript3415/f2p0/2847,transcript_HQ_YNLB_transcript10385/f2p0/2116,…
GO:0044712	single-organism catabolic process	biological_process	0.056097	1	268	22033	446	39009	transcript_HQ_YNMLP_transcript16575/f2p0/1655,transcript_HQ_HBZL_transcript21534/f2p0/1106,transcript_HQ_HBZL_transcript9032/f2p0/2141,transcript_HQ_HBZL_transcript7430/f2p0/2291,transcript_HQ_HBZL_transcript8289/f28p0/2123,transcript_HQ_YNLB_transcript1580/f2p0/3637,transcript_HQ_SCJY_transcript18425/f4p0/924,transcript_HQ_YNLB_transcript13071/f7p0/1847,transcript_HQ_SCEZ_transcript16986/f3p0/14…
GO:0016301	kinase activity	molecular_function	0.056116	1	2186	22033	3740	39009	transcript_HQ_YNMLP_transcript22604/f6p0/934,transcript_HQ_HBZL_transcript8848/f5p0/2148,transcript_HQ_YNLB_transcript14194/f2p0/1746,transcript_HQ_YNLB_transcript730/f3p0/4181,transcript_HQ_YNLB_transcript9912/f2p0/2159,transcript_HQ_HBZL_transcript9222/f11p0/2101,transcript_HQ_HBZL_transcript9330/f2p0/2120,transcript_HQ_HBZL_transcript2830/f4p0/3003,transcript_HQ_HBZL_transcript6448/f2p0/2392,t…
f3p0/2222,transcript_HQ_YNMLP_transcript6666/f3p0/2721,transcript_HQ_HBZL_transcript10168/f5p0/2051,transcript_HQ_YNLB_transcript7325/f3p0/2445,transcript_HQ_SCJY_transcript12344/f6p0/1687,transcript_HQ_HBZL_transcript15382/f4p0/1714,transcript_HQ_HBZL_transcript4423/f3p0/2694,transcript_HQ_HBZL_transcript518/f2p0/4202,transcript_HQ_YNMLP_transcript10596/f10p0/2334,transcript_HQ_YNLB_transcript18…
t2285/f3p0/3329,transcript_HQ_HBZL_transcript8895/f2p0/2127,transcript_HQ_YNMLP_transcript8544/f2p0/2437,transcript_HQ_YNLB_transcript10732/f3p0/2078,transcript_HQ_SCJY_transcript8592/f3p0/2132,transcript_HQ_YNMLP_transcript3999/f2p0/3115,transcript_HQ_YNLB_transcript4544/f2p0/2805,transcript_HQ_HBZL_transcript1120/f2p0/3677,transcript_HQ_YNMLP_transcript3358/f3p0/3227,transcript_HQ_HBZL_transcri…
GO:0065009	regulation of molecular function	biological_process	0.057111	1	84	22033	132	39009	transcript_HQ_YNMLP_transcript7646/f2p0/2714,transcript_HQ_YNMLP_transcript526/f2p0/4518,transcript_HQ_HBZL_transcript11907/f2p0/1963,transcript_HQ_YNMLP_transcript1108/f2p0/4014,transcript_HQ_YNMLP_transcript4559/f2p0/3001,transcript_HQ_YNMLP_transcript7916/f2p0/2583,transcript_HQ_HBZL_transcript21002/f2p0/1143,transcript_HQ_HBZL_transcript30/f3p0/6883,transcript_HQ_HBZL_transcript2207/f2p0/3195…
GO:1902533	positive regulation of intracellular signal transduction	biological_process	0.05723	1	10	22033	12	39009	transcript_HQ_YNLB_transcript1245/f2p0/3796,transcript_HQ_SCJY_transcript7658/f2p0/2217,transcript_HQ_YNLB_transcript10385/f2p0/2116,transcript_HQ_HBZL_transcript3400/f2p0/2888,transcript_HQ_HBZL_transcript3649/f2p0/2802,transcript_HQ_HBZL_transcript8284/f7p0/2189,transcript_HQ_SCEZ_transcript22019/f2p0/976,transcript_HQ_HBZL_transcript6823/f3p0/2348,transcript_HQ_HBZL_transcript1324/f2p0/3564,tr…
GO:0016998	cell wall macromolecule catabolic process	biological_process	0.057393	1	30	22033	44	39009	transcript_HQ_HBZL_transcript18659/f2p0/1390,transcript_HQ_HBZL_transcript21836/f7p0/1064,transcript_HQ_HBZL_transcript21171/f5p0/1158,transcript_HQ_YNLB_transcript18014/f5p0/1214,transcript_HQ_SCJY_transcript18439/f2p0/927,transcript_HQ_HBZL_transcript21309/f3p0/1136,transcript_HQ_SCJY_transcript15040/f2p0/1373,transcript_HQ_YNLB_transcript17162/f4p0/1352,transcript_HQ_YNLB_transcript15878/f7p0/…
GO:0015996	chlorophyll catabolic process	biological_process	0.058093	1	34	22033	50	39009	transcript_HQ_YNMLP_transcript17905/f3p0/1484,transcript_HQ_HBZL_transcript15926/f2p0/1617,transcript_HQ_HBZL_transcript10985/f24p0/1952,transcript_HQ_HBZL_transcript19530/f2p0/1292,transcript_HQ_YNLB_transcript18230/f2p0/1200,transcript_HQ_YNMLP_transcript14724/f7p0/1840,transcript_HQ_YNLB_transcript18204/f2p0/1194,transcript_HQ_YNLB_transcript12139/f6p0/1944,transcript_HQ_YNLB_transcript17110/f…
GO:0046149	pigment catabolic process	biological_process	0.058093	1	34	22033	50	39009	transcript_HQ_YNLB_transcript17110/f4p0/1297,transcript_HQ_YNLB_transcript12139/f6p0/1944,transcript_HQ_YNMLP_transcript4484/f3p0/3018,transcript_HQ_HBZL_transcript19147/f9p0/1364,transcript_HQ_YNLB_transcript18204/f2p0/1194,transcript_HQ_HBZL_transcript21913/f6p0/1056,transcript_HQ_HBZL_transcript16825/f2p0/1541,transcript_HQ_SCJY_transcript13725/f2p0/1528,transcript_HQ_HBZL_transcript17340/f3p0…
GO:0047746	chlorophyllase activity	molecular_function	0.058093	1	34	22033	50	39009	transcript_HQ_YNMLP_transcript16029/f3p0/1680,transcript_HQ_YNLB_transcript17615/f2p0/1272,transcript_HQ_SCJY_transcript16393/f33p0/1114,transcript_HQ_SCEZ_transcript18658/f2p0/1315,transcript_HQ_HBZL_transcript19996/f2p0/1257,transcript_HQ_HBZL_transcript2068/f2p0/3231,transcript_HQ_YNMLP_transcript19123/f2p0/1303,transcript_HQ_YNLB_transcript18065/f2p0/1205,transcript_HQ_YNMLP_transcript16707/f…
GO:0015994	chlorophyll metabolic process	biological_process	0.058479	1	39	22033	58	39009	transcript_HQ_HBZL_transcript15926/f2p0/1617,transcript_HQ_HBZL_transcript10985/f24p0/1952,transcript_HQ_SCJY_transcript16420/f2p0/1174,transcript_HQ_YNMLP_transcript4380/f2p0/3030,transcript_HQ_YNMLP_transcript17905/f3p0/1484,transcript_HQ_YNMLP_transcript14724/f7p0/1840,transcript_HQ_HBZL_transcript19530/f2p0/1292,transcript_HQ_YNMLP_transcript4491/f2p0/3035,transcript_HQ_YNLB_transcript18230/f…
GO:0043412	macromolecule modification	biological_process	0.058543	1	2610	22033	4493	39009	transcript_HQ_HBZL_transcript2160/f3p0/3216,transcript_HQ_HBZL_transcript22397/f5p0/1002,transcript_HQ_YNLB_transcript5800/f2p0/2643,transcript_HQ_SCJY_transcript10814/f2p0/1864,transcript_HQ_SCJY_transcript11018/f2p0/1824,transcript_HQ_HBZL_transcript3192/f2p0/2904,transcript_HQ_YNMLP_transcript12192/f2p0/2136,transcript_HQ_HBZL_transcript8201/f5p0/2200,transcript_HQ_SCEZ_transcript17985/f2p0/13…
CJY_transcript13080/f8p0/1600,transcript_HQ_HBZL_transcript11925/f2p0/1900,transcript_HQ_HBZL_transcript968/f2p0/3830,transcript_HQ_HBZL_transcript4620/f3p0/2648,transcript_HQ_HBZL_transcript12313/f2p0/1860,transcript_HQ_HBZL_transcript15783/f18p0/1616,transcript_HQ_YNMLP_transcript5561/f2p0/2834,transcript_HQ_HBZL_transcript177/f2p0/5220,transcript_HQ_SCEZ_transcript1298/f5p0/3496,transcript_HQ_…
ript2907/f6p0/2982,transcript_HQ_HBZL_transcript4485/f2p0/2676,transcript_HQ_SCJY_transcript16375/f3p0/1171,transcript_HQ_SCJY_transcript14622/f2p0/1398,transcript_HQ_YNLB_transcript14181/f2p0/1719,transcript_HQ_YNLB_transcript10103/f2p0/2140,transcript_HQ_HBZL_transcript7619/f2p0/2249,transcript_HQ_HBZL_transcript20954/f2p0/1184,transcript_HQ_YNMLP_transcript19114/f3p0/1309,transcript_HQ_HBZL_tr…
841,transcript_HQ_YNLB_transcript2944/f2p0/3136,transcript_HQ_YNLB_transcript22063/f3p0/718,transcript_HQ_SCJY_transcript18025/f4p0/969,transcript_HQ_HBZL_transcript10392/f5p0/2018,transcript_HQ_SCJY_transcript3111/f2p0/2784,transcript_HQ_HBZL_transcript1262/f7p0/3535,transcript_HQ_HBZL_transcript11984/f2p0/1880,transcript_HQ_YNMLP_transcript2022/f2p0/3655,transcript_HQ_YNMLP_transcript5229/f3p0/…
GO:0045892	negative regulation of transcription, DNA-templated	biological_process	0.059472	1	16	22033	21	39009	transcript_HQ_HBZL_transcript15681/f3p0/1684,transcript_HQ_HBZL_transcript14890/f3p0/1688,transcript_HQ_YNLB_transcript2119/f2p0/3387,transcript_HQ_HBZL_transcript3360/f5p0/2869,transcript_HQ_HBZL_transcript2173/f5p0/3243,transcript_HQ_YNMLP_transcript6845/f2p0/2699,transcript_HQ_HBZL_transcript2145/f2p0/3207,transcript_HQ_HBZL_transcript19273/f2p0/1325,transcript_HQ_HBZL_transcript9634/f5p0/2078…
GO:0045934	negative regulation of nucleobase-containing compound metabolic process	biological_process	0.059472	1	16	22033	21	39009	transcript_HQ_YNLB_transcript4321/f6p0/2906,transcript_HQ_HBZL_transcript1962/f12p0/3220,transcript_HQ_YNMLP_transcript5763/f3p0/2830,transcript_HQ_HBZL_transcript13784/f2p0/1764,transcript_HQ_YNLB_transcript3442/f7p0/3011,transcript_HQ_YNMLP_transcript6845/f2p0/2699,transcript_HQ_HBZL_transcript2173/f5p0/3243,transcript_HQ_HBZL_transcript2145/f2p0/3207,transcript_HQ_HBZL_transcript19273/f2p0/132…
GO:0051253	negative regulation of RNA metabolic process	biological_process	0.059472	1	16	22033	21	39009	transcript_HQ_YNMLP_transcript2822/f2p0/3363,transcript_HQ_SCEZ_transcript16277/f3p0/1539,transcript_HQ_HBZL_transcript9634/f5p0/2078,transcript_HQ_HBZL_transcript2145/f2p0/3207,transcript_HQ_HBZL_transcript19273/f2p0/1325,transcript_HQ_YNMLP_transcript6845/f2p0/2699,transcript_HQ_HBZL_transcript2173/f5p0/3243,transcript_HQ_YNLB_transcript3442/f7p0/3011,transcript_HQ_HBZL_transcript13784/f2p0/176…
GO:1902679	negative regulation of RNA biosynthetic process	biological_process	0.059472	1	16	22033	21	39009	transcript_HQ_HBZL_transcript9634/f5p0/2078,transcript_HQ_SCEZ_transcript16277/f3p0/1539,transcript_HQ_YNMLP_transcript2822/f2p0/3363,transcript_HQ_YNMLP_transcript6845/f2p0/2699,transcript_HQ_HBZL_transcript2173/f5p0/3243,transcript_HQ_HBZL_transcript2145/f2p0/3207,transcript_HQ_HBZL_transcript19273/f2p0/1325,transcript_HQ_HBZL_transcript13784/f2p0/1764,transcript_HQ_YNLB_transcript3442/f7p0/301…
GO:1903507	negative regulation of nucleic acid-templated transcription	biological_process	0.059472	1	16	22033	21	39009	transcript_HQ_HBZL_transcript3360/f5p0/2869,transcript_HQ_YNLB_transcript2119/f2p0/3387,transcript_HQ_HBZL_transcript14890/f3p0/1688,transcript_HQ_HBZL_transcript15681/f3p0/1684,transcript_HQ_HBZL_transcript13784/f2p0/1764,transcript_HQ_YNLB_transcript3442/f7p0/3011,transcript_HQ_YNLB_transcript4321/f6p0/2906,transcript_HQ_HBZL_transcript1962/f12p0/3220,transcript_HQ_YNMLP_transcript5763/f3p0/283…
GO:0051338	regulation of transferase activity	biological_process	0.059646	1	23	22033	32	39009	transcript_HQ_YNMLP_transcript17903/f2p0/1497,transcript_HQ_HBZL_transcript21239/f2p0/1108,transcript_HQ_YNMLP_transcript18728/f2p0/1363,transcript_HQ_HBZL_transcript22396/f2p0/1018,transcript_HQ_YNLB_transcript48/f2p0/6942,transcript_HQ_YNMLP_transcript526/f2p0/4518,transcript_HQ_YNLB_transcript18947/f2p0/1046,transcript_HQ_YNMLP_transcript1108/f2p0/4014,transcript_HQ_HBZL_transcript21002/f2p0/1…
GO:0016772	transferase activity, transferring phosphorus-containing groups	molecular_function	0.060718	1	2747	22033	4727	39009	transcript_HQ_HBZL_transcript4589/f3p0/2660,transcript_HQ_HBZL_transcript16163/f4p0/1599,transcript_HQ_HBZL_transcript13100/f3p0/1814,transcript_HQ_YNLB_transcript17777/f5p0/1236,transcript_HQ_SCJY_transcript2120/f2p0/2971,transcript_HQ_YNLB_transcript444/f2p0/4643,transcript_HQ_YNLB_transcript18537/f4p0/1139,transcript_HQ_YNLB_transcript4091/f2p0/2897,transcript_HQ_YNMLP_transcript398/f2p0/4942,…
ript_HQ_HBZL_transcript320/f3p0/4629,transcript_HQ_HBZL_transcript9229/f3p0/2122,transcript_HQ_HBZL_transcript13594/f11p0/1767,transcript_HQ_HBZL_transcript22206/f36p0/923,transcript_HQ_HBZL_transcript540/f4p0/4256,transcript_HQ_HBZL_transcript21450/f10p0/1104,transcript_HQ_YNLB_transcript2202/f2p0/3355,transcript_HQ_YNMLP_transcript12440/f2p0/2122,transcript_HQ_HBZL_transcript999/f2p0/3778,trans…
script_HQ_YNLB_transcript18095/f2p0/1222,transcript_HQ_HBZL_transcript22337/f3p0/1032,transcript_HQ_HBZL_transcript6598/f2p0/2380,transcript_HQ_YNLB_transcript5458/f2p0/2686,transcript_HQ_YNMLP_transcript320/f2p0/5079,transcript_HQ_SCEZ_transcript17760/f4p0/1406,transcript_HQ_YNMLP_transcript13941/f3p0/1952,transcript_HQ_HBZL_transcript5154/f4p0/2582,transcript_HQ_HBZL_transcript18759/f2p0/1374,t…
cript1928/f2p0/3226,transcript_HQ_YNMLP_transcript22465/f2p0/937,transcript_HQ_SCJY_transcript3279/f2p0/2733,transcript_HQ_YNMLP_transcript2461/f3p0/3484,transcript_HQ_HBZL_transcript2027/f5p0/3244,transcript_HQ_HBZL_transcript1838/f32p0/3307,transcript_HQ_YNMLP_transcript9553/f2p0/2416,transcript_HQ_HBZL_transcript7016/f4p0/2281,transcript_HQ_SCJY_transcript13001/f2p0/1645,transcript_HQ_YNLB_tra…
GO:0019072	viral genome packaging	biological_process	0.061752	1	5	22033	5	39009	transcript_HQ_SCJY_transcript10036/f3p0/1938,transcript_HQ_HBZL_transcript11433/f4p0/1940,transcript_HQ_YNMLP_transcript613/f2p0/4607,transcript_HQ_HBZL_transcript11886/f23p0/1922,transcript_HQ_HBZL_transcript12565/f2p0/1917
GO:0006694	steroid biosynthetic process	biological_process	0.061993	1	148	22033	242	39009	transcript_HQ_SCJY_transcript15091/f6p0/1332,transcript_HQ_YNLB_transcript16440/f2p0/1446,transcript_HQ_YNLB_transcript15676/f2p0/1556,transcript_HQ_SCEZ_transcript19654/f11p0/1218,transcript_HQ_HBZL_transcript12972/f6p0/1810,transcript_HQ_HBZL_transcript21774/f4p0/1059,transcript_HQ_YNLB_transcript13887/f3p0/1753,transcript_HQ_YNMLP_transcript18696/f5p0/1366,transcript_HQ_SCEZ_transcript17865/f4…
GO:0016740	transferase activity	molecular_function	0.062205	1	4700	22033	8154	39009	transcript_HQ_SCJY_transcript541/f4p0/3737,transcript_HQ_YNLB_transcript10968/f2p0/2123,transcript_HQ_HBZL_transcript9356/f2p0/2136,transcript_HQ_SCJY_transcript13073/f2p0/1604,transcript_HQ_SCJY_transcript8377/f2p0/2139,transcript_HQ_SCJY_transcript9628/f2p0/1991,transcript_HQ_YNMLP_transcript3648/f10p0/3180,transcript_HQ_HBZL_transcript15097/f2p0/1674,transcript_HQ_HBZL_transcript20425/f2p0/121…
pt7799/f3p0/2688,transcript_HQ_HBZL_transcript1233/f3p0/3603,transcript_HQ_HBZL_transcript18720/f3p0/1385,transcript_HQ_YNMLP_transcript7801/f2p0/2677,transcript_HQ_YNMLP_transcript1809/f3p0/3763,transcript_HQ_YNLB_transcript9504/f3p0/2267,transcript_HQ_SCJY_transcript1519/f4p0/3222,transcript_HQ_YNMLP_transcript14641/f3p0/1855,transcript_HQ_YNMLP_transcript19440/f4p0/1275,transcript_HQ_HBZL_tran…
89,transcript_HQ_YNMLP_transcript5058/f2p0/2914,transcript_HQ_YNLB_transcript17427/f3p0/1304,transcript_HQ_YNMLP_transcript4004/f2p0/3104,transcript_HQ_HBZL_transcript14523/f9p0/1735,transcript_HQ_YNMLP_transcript23940/f2p0/781,transcript_HQ_HBZL_transcript21868/f2p0/1054,transcript_HQ_YNLB_transcript7700/f2p0/2404,transcript_HQ_HBZL_transcript22817/f4p0/931,transcript_HQ_HBZL_transcript6288/f2p0…
ript_HQ_HBZL_transcript14820/f5p0/1722,transcript_HQ_HBZL_transcript15670/f3p0/1650,transcript_HQ_HBZL_transcript3063/f9p0/2922,transcript_HQ_HBZL_transcript18426/f6p0/1411,transcript_HQ_HBZL_transcript3870/f3p0/2761,transcript_HQ_SCJY_transcript13993/f2p0/1507,transcript_HQ_YNMLP_transcript6634/f11p0/2705,transcript_HQ_YNMLP_transcript173/f2p0/5746,transcript_HQ_YNMLP_transcript2878/f2p0/3351,tr…
ript2718/f2p0/3232,transcript_HQ_YNMLP_transcript9417/f6p0/2440,transcript_HQ_SCJY_transcript425/f2p0/3847,transcript_HQ_YNMLP_transcript18449/f2p0/1401,transcript_HQ_YNMLP_transcript23915/f2p0/771,transcript_HQ_HBZL_transcript8030/f3p0/2182,transcript_HQ_HBZL_transcript9445/f9p0/1987,transcript_HQ_HBZL_transcript19810/f4p0/1341,transcript_HQ_HBZL_transcript13222/f3p0/1805,transcript_HQ_HBZL_tran…
pt_HQ_HBZL_transcript8472/f6p0/2205,transcript_HQ_YNLB_transcript12326/f5p0/1951,transcript_HQ_YNLB_transcript228/f2p0/5311,transcript_HQ_YNMLP_transcript306/f8p0/5111,transcript_HQ_HBZL_transcript5396/f3p0/2532,transcript_HQ_YNLB_transcript9810/f2p0/2175,transcript_HQ_HBZL_transcript1173/f8p0/3651,transcript_HQ_HBZL_transcript7501/f3p0/2255,transcript_HQ_YNMLP_transcript16366/f8p0/1661,transcrip…
2751,transcript_HQ_SCJY_transcript6046/f2p0/2402,transcript_HQ_YNLB_transcript8587/f2p0/2340,transcript_HQ_HBZL_transcript18561/f8p0/1398,transcript_HQ_YNMLP_transcript963/f3p0/4097,transcript_HQ_YNMLP_transcript19060/f2p0/1312,transcript_HQ_HBZL_transcript20729/f3p0/1208,transcript_HQ_HBZL_transcript15111/f10p0/1626,transcript_HQ_HBZL_transcript8072/f5p0/2212,transcript_HQ_HBZL_transcript14449/f…
GO:0005578	proteinaceous extracellular matrix	cellular_component	0.062686	1	195	22033	325	39009	transcript_HQ_HBZL_transcript22036/f5p0/1031,transcript_HQ_HBZL_transcript23479/f6p0/869,transcript_HQ_YNMLP_transcript21687/f2p0/1009,transcript_HQ_YNLB_transcript22219/f4p0/707,transcript_HQ_HBZL_transcript24390/f4p0/797,transcript_HQ_HBZL_transcript23213/f14p0/917,transcript_HQ_YNMLP_transcript20639/f2p0/1132,transcript_HQ_HBZL_transcript25798/f2p0/663,transcript_HQ_YNMLP_transcript10873/f2p0/…
GO:0097367	carbohydrate derivative binding	molecular_function	0.063015	1	3549	22033	6114	39009	transcript_HQ_HBZL_transcript13988/f2p0/1751,transcript_HQ_HBZL_transcript20003/f4p0/1249,transcript_HQ_YNMLP_transcript19322/f3p0/1279,transcript_HQ_SCJY_transcript6983/f2p0/2293,transcript_HQ_YNMLP_transcript755/f2p0/4332,transcript_HQ_HBZL_transcript9445/f9p0/1987,transcript_HQ_YNLB_transcript11176/f6p0/2019,transcript_HQ_HBZL_transcript19810/f4p0/1341,transcript_HQ_YNLB_transcript4254/f3p0/28…
t17425/f3p0/1001,transcript_HQ_YNLB_transcript1698/f6p0/3569,transcript_HQ_SCJY_transcript5833/f2p0/2389,transcript_HQ_YNLB_transcript9390/f3p0/2251,transcript_HQ_HBZL_transcript21377/f2p0/1127,transcript_HQ_HBZL_transcript8624/f4p0/2209,transcript_HQ_HBZL_transcript8403/f10p0/2194,transcript_HQ_SCJY_transcript11744/f2p0/1751,transcript_HQ_HBZL_transcript3700/f4p0/2793,transcript_HQ_HBZL_transcri…
anscript8874/f2p0/2079,transcript_HQ_HBZL_transcript18808/f3p0/1386,transcript_HQ_HBZL_transcript9037/f155p0/2141,transcript_HQ_HBZL_transcript564/f2p0/4158,transcript_HQ_HBZL_transcript4220/f5p0/2712,transcript_HQ_HBZL_transcript3660/f8p0/2782,transcript_HQ_YNMLP_transcript1691/f2p0/3739,transcript_HQ_HBZL_transcript14129/f9p0/1737,transcript_HQ_YNLB_transcript9967/f2p0/2177,transcript_HQ_YNLB_t…
anscript_HQ_YNLB_transcript15730/f12p0/1521,transcript_HQ_YNMLP_transcript13121/f2p0/2034,transcript_HQ_YNMLP_transcript10238/f3p0/2338,transcript_HQ_HBZL_transcript45/f11p0/6644,transcript_HQ_YNMLP_transcript17425/f5p0/1573,transcript_HQ_YNMLP_transcript6223/f9p0/2775,transcript_HQ_YNLB_transcript7906/f12p0/2392,transcript_HQ_HBZL_transcript201/f9p0/5023,transcript_HQ_HBZL_transcript13040/f24p0/…
Q_HBZL_transcript1993/f2p0/3271,transcript_HQ_HBZL_transcript6785/f2p0/2371,transcript_HQ_YNMLP_transcript20621/f2p0/1126,transcript_HQ_SCJY_transcript8156/f12p0/2140,transcript_HQ_YNMLP_transcript10288/f3p0/2338,transcript_HQ_HBZL_transcript8000/f2p0/2244,transcript_HQ_SCJY_transcript8474/f2p0/2097,transcript_HQ_HBZL_transcript9980/f3p0/1962,transcript_HQ_YNMLP_transcript1850/f3p0/3677,transcrip…
GO:0006405	RNA export from nucleus	biological_process	0.063053	1	23	22033	33	39009	transcript_HQ_YNMLP_transcript16528/f3p0/1664,transcript_HQ_YNLB_transcript23612/f2p0/540,transcript_HQ_YNLB_transcript6417/f2p0/2557,transcript_HQ_YNLB_transcript16521/f8p0/1424,transcript_HQ_YNMLP_transcript6736/f6p0/2723,transcript_HQ_YNMLP_transcript6239/f2p0/2767,transcript_HQ_YNMLP_transcript26440/f4p0/553,transcript_HQ_YNMLP_transcript6751/f3p0/2711,transcript_HQ_YNMLP_transcript3581/f2p0/…
GO:0006406	mRNA export from nucleus	biological_process	0.063053	1	23	22033	33	39009	transcript_HQ_YNMLP_transcript17801/f2p0/1522,transcript_HQ_SCJY_transcript12432/f3p0/1679,transcript_HQ_HBZL_transcript26771/f5p0/539,transcript_HQ_YNLB_transcript23495/f2p0/559,transcript_HQ_YNLB_transcript6270/f2p0/2573,transcript_HQ_HBZL_transcript17846/f2p0/1464,transcript_HQ_HBZL_transcript14364/f4p0/1726,transcript_HQ_HBZL_transcript26740/f3p0/541,transcript_HQ_HBZL_transcript4195/f2p0/269…
GO:0051168	nuclear export	biological_process	0.063053	1	23	22033	33	39009	transcript_HQ_YNLB_transcript16521/f8p0/1424,transcript_HQ_YNLB_transcript6417/f2p0/2557,transcript_HQ_YNMLP_transcript16528/f3p0/1664,transcript_HQ_YNLB_transcript23612/f2p0/540,transcript_HQ_HBZL_transcript25723/f3p0/654,transcript_HQ_YNLB_transcript23529/f3p0/575,transcript_HQ_YNMLP_transcript2801/f2p0/3367,transcript_HQ_HBZL_transcript7275/f2p0/2313,transcript_HQ_YNMLP_transcript6239/f2p0/276…
GO:0071166	ribonucleoprotein complex localization	biological_process	0.063053	1	23	22033	33	39009	transcript_HQ_YNLB_transcript6270/f2p0/2573,transcript_HQ_YNLB_transcript23495/f2p0/559,transcript_HQ_HBZL_transcript26771/f5p0/539,transcript_HQ_SCJY_transcript12432/f3p0/1679,transcript_HQ_YNMLP_transcript17801/f2p0/1522,transcript_HQ_HBZL_transcript4195/f2p0/2699,transcript_HQ_HBZL_transcript26740/f3p0/541,transcript_HQ_HBZL_transcript14364/f4p0/1726,transcript_HQ_HBZL_transcript17846/f2p0/146…
GO:0071426	ribonucleoprotein complex export from nucleus	biological_process	0.063053	1	23	22033	33	39009	transcript_HQ_YNMLP_transcript16528/f3p0/1664,transcript_HQ_YNLB_transcript23612/f2p0/540,transcript_HQ_YNLB_transcript16521/f8p0/1424,transcript_HQ_YNLB_transcript6417/f2p0/2557,transcript_HQ_YNMLP_transcript6239/f2p0/2767,transcript_HQ_YNMLP_transcript6736/f6p0/2723,transcript_HQ_YNLB_transcript4200/f2p0/2861,transcript_HQ_YNMLP_transcript6751/f3p0/2711,transcript_HQ_YNMLP_transcript3581/f2p0/3…
GO:0071427	mRNA-containing ribonucleoprotein complex export from nucleus	biological_process	0.063053	1	23	22033	33	39009	transcript_HQ_YNMLP_transcript17801/f2p0/1522,transcript_HQ_HBZL_transcript26771/f5p0/539,transcript_HQ_SCJY_transcript12432/f3p0/1679,transcript_HQ_YNLB_transcript6270/f2p0/2573,transcript_HQ_YNLB_transcript23495/f2p0/559,transcript_HQ_HBZL_transcript17846/f2p0/1464,transcript_HQ_HBZL_transcript26740/f3p0/541,transcript_HQ_HBZL_transcript14364/f4p0/1726,transcript_HQ_HBZL_transcript4195/f2p0/269…
GO:0009877	nodulation	biological_process	0.063351	1	25	22033	36	39009	transcript_HQ_HBZL_transcript26641/f2p0/552,transcript_HQ_YNLB_transcript17515/f26p0/1276,transcript_HQ_HBZL_transcript11485/f10p0/1926,transcript_HQ_HBZL_transcript8889/f2p0/2139,transcript_HQ_HBZL_transcript20021/f5p0/1286,transcript_HQ_YNMLP_transcript19779/f2p0/1226,transcript_HQ_HBZL_transcript14475/f3p0/1711,transcript_HQ_YNLB_transcript10862/f2p0/2059,transcript_HQ_YNMLP_transcript5820/f2p…
GO:0016835	carbon-oxygen lyase activity	molecular_function	0.063785	1	152	22033	247	39009	transcript_HQ_HBZL_transcript17546/f2p0/1480,transcript_HQ_SCJY_transcript11436/f4p0/1780,transcript_HQ_YNLB_transcript11968/f2p0/1952,transcript_HQ_HBZL_transcript12166/f2p0/1874,transcript_HQ_SCJY_transcript18482/f3p0/930,transcript_HQ_SCJY_transcript6434/f2p0/2322,transcript_HQ_YNMLP_transcript17260/f3p0/1535,transcript_HQ_YNMLP_transcript6764/f2p0/2711,transcript_HQ_HBZL_transcript4171/f10p0/…
GO:0006935	chemotaxis	biological_process	0.063839	1	11	22033	14	39009	transcript_HQ_SCJY_transcript20988/f4p0/676,transcript_HQ_SCJY_transcript23164/f3p0/436,transcript_HQ_YNLB_transcript14872/f2p0/1647,transcript_HQ_HBZL_transcript9435/f2p0/2101,transcript_HQ_YNLB_transcript15010/f2p0/1639,transcript_HQ_HBZL_transcript20555/f2p0/1194,transcript_HQ_YNMLP_transcript17363/f7p0/1500,transcript_HQ_HBZL_transcript4751/f3p0/2597,transcript_HQ_YNMLP_transcript17865/f8p0/1…
GO:0004488	methylenetetrahydrofolate dehydrogenase (NADP+) activity	molecular_function	0.065566	1	24	22033	34	39009	transcript_HQ_YNMLP_transcript3834/f4p0/3128,transcript_HQ_YNMLP_transcript20685/f2p0/1080,transcript_HQ_SCJY_transcript17408/f5p0/1044,transcript_HQ_YNLB_transcript17396/f2p0/1307,transcript_HQ_HBZL_transcript3965/f2p0/2752,transcript_HQ_SCEZ_transcript19387/f12p0/1245,transcript_HQ_HBZL_transcript2695/f6p0/3030,transcript_HQ_HBZL_transcript5993/f3p0/2441,transcript_HQ_HBZL_transcript21421/f6p0/…
GO:0042558	pteridine-containing compound metabolic process	biological_process	0.065721	1	35	22033	52	39009	transcript_HQ_YNMLP_transcript3834/f4p0/3128,transcript_HQ_YNMLP_transcript20685/f2p0/1080,transcript_HQ_SCJY_transcript17408/f5p0/1044,transcript_HQ_HBZL_transcript25751/f7p0/640,transcript_HQ_YNLB_transcript17396/f2p0/1307,transcript_HQ_HBZL_transcript2695/f6p0/3030,transcript_HQ_HBZL_transcript5993/f3p0/2441,transcript_HQ_YNMLP_transcript17117/f2p0/1580,transcript_HQ_SCEZ_transcript19387/f12p0…
GO:0009975	cyclase activity	molecular_function	0.066389	1	15	22033	20	39009	transcript_HQ_YNMLP_transcript23645/f3p0/832,transcript_HQ_YNLB_transcript16574/f2p0/1428,transcript_HQ_YNMLP_transcript15703/f2p0/1711,transcript_HQ_SCEZ_transcript23678/f5p0/794,transcript_HQ_YNMLP_transcript2228/f2p0/3561,transcript_HQ_HBZL_transcript13490/f2p0/1774,transcript_HQ_SCJY_transcript19530/f2p0/825,transcript_HQ_HBZL_transcript10680/f4p0/1997,transcript_HQ_YNMLP_transcript2168/f2p0/…
GO:0031399	regulation of protein modification process	biological_process	0.067708	1	29	22033	42	39009	transcript_HQ_YNMLP_transcript18728/f2p0/1363,transcript_HQ_YNLB_transcript20608/f4p0/896,transcript_HQ_HBZL_transcript22396/f2p0/1018,transcript_HQ_YNMLP_transcript17903/f2p0/1497,transcript_HQ_HBZL_transcript1925/f2p0/3331,transcript_HQ_HBZL_transcript21239/f2p0/1108,transcript_HQ_HBZL_transcript21002/f2p0/1143,transcript_HQ_HBZL_transcript315/f2p0/4645,transcript_HQ_HBZL_transcript30/f3p0/6883…
GO:0000105	histidine biosynthetic process	biological_process	0.068016	1	43	22033	65	39009	transcript_HQ_HBZL_transcript15568/f2p0/1632,transcript_HQ_HBZL_transcript19750/f2p0/1276,transcript_HQ_YNLB_transcript29/f2p0/7342,transcript_HQ_HBZL_transcript13160/f3p0/1805,transcript_HQ_YNLB_transcript12798/f3p0/1874,transcript_HQ_SCJY_transcript15203/f4p0/1334,transcript_HQ_SCEZ_transcript14093/f3p0/1732,transcript_HQ_HBZL_transcript953/f2p0/3786,transcript_HQ_SCEZ_transcript13643/f2p0/1751…
GO:0006547	histidine metabolic process	biological_process	0.068016	1	43	22033	65	39009	transcript_HQ_YNMLP_transcript14790/f17p0/1878,transcript_HQ_HBZL_transcript20005/f2p0/1254,transcript_HQ_SCJY_transcript18482/f3p0/930,transcript_HQ_HBZL_transcript12945/f2p0/1825,transcript_HQ_SCEZ_transcript13643/f2p0/1751,transcript_HQ_HBZL_transcript5400/f2p0/2552,transcript_HQ_HBZL_transcript18841/f2p0/1371,transcript_HQ_YNLB_transcript12334/f7p0/1938,transcript_HQ_HBZL_transcript13/f2p0/74…
GO:0052803	imidazole-containing compound metabolic process	biological_process	0.068016	1	43	22033	65	39009	transcript_HQ_HBZL_transcript19750/f2p0/1276,transcript_HQ_HBZL_transcript15568/f2p0/1632,transcript_HQ_HBZL_transcript953/f2p0/3786,transcript_HQ_SCEZ_transcript14093/f3p0/1732,transcript_HQ_HBZL_transcript13160/f3p0/1805,transcript_HQ_YNLB_transcript12798/f3p0/1874,transcript_HQ_SCJY_transcript15203/f4p0/1334,transcript_HQ_YNLB_transcript29/f2p0/7342,transcript_HQ_YNMLP_transcript14790/f17p0/18…
GO:0016071	mRNA metabolic process	biological_process	0.068556	1	261	22033	434	39009	transcript_HQ_SCJY_transcript83/f3p0/4845,transcript_HQ_HBZL_transcript25684/f6p0/654,transcript_HQ_SCEZ_transcript19660/f3p0/1240,transcript_HQ_SCJY_transcript17012/f2p0/1077,transcript_HQ_YNMLP_transcript21572/f2p0/1047,transcript_HQ_HBZL_transcript19976/f5p0/1249,transcript_HQ_SCEZ_transcript2193/f4p0/3078,transcript_HQ_YNMLP_transcript24239/f2p0/748,transcript_HQ_SCJY_transcript21402/f3p0/654…
GO:0046906	tetrapyrrole binding	molecular_function	0.068727	1	460	22033	781	39009	transcript_HQ_YNMLP_transcript3307/f2p0/3253,transcript_HQ_HBZL_transcript11380/f2p0/1938,transcript_HQ_YNMLP_transcript7028/f5p0/2713,transcript_HQ_YNMLP_transcript12744/f3p0/2096,transcript_HQ_SCJY_transcript20785/f5p0/699,transcript_HQ_YNMLP_transcript16164/f2p0/1677,transcript_HQ_HBZL_transcript13925/f3p0/1749,transcript_HQ_YNLB_transcript12563/f6p0/1867,transcript_HQ_SCJY_transcript12840/f2p…
GO:1901565	organonitrogen compound catabolic process	biological_process	0.070632	1	100	22033	161	39009	transcript_HQ_YNMLP_transcript22648/f7p0/896,transcript_HQ_HBZL_transcript19530/f2p0/1292,transcript_HQ_HBZL_transcript20507/f3p0/1209,transcript_HQ_YNLB_transcript18814/f2p0/1096,transcript_HQ_HBZL_transcript21662/f7p0/1077,transcript_HQ_YNMLP_transcript14724/f7p0/1840,transcript_HQ_YNLB_transcript8394/f2p0/2319,transcript_HQ_YNMLP_transcript2558/f2p0/3494,transcript_HQ_YNLB_transcript15758/f8p0…
GO:0042176	regulation of protein catabolic process	biological_process	0.071315	1	31	22033	45	39009	transcript_HQ_SCEZ_transcript19783/f4p0/1209,transcript_HQ_HBZL_transcript30/f3p0/6883,transcript_HQ_HBZL_transcript5855/f2p0/2521,transcript_HQ_SCJY_transcript10780/f3p0/1856,transcript_HQ_YNLB_transcript12367/f5p0/1908,transcript_HQ_YNLB_transcript18947/f2p0/1046,transcript_HQ_YNMLP_transcript1108/f2p0/4014,transcript_HQ_YNLB_transcript48/f2p0/6942,transcript_HQ_YNMLP_transcript526/f2p0/4518,tr…
GO:0008202	steroid metabolic process	biological_process	0.071735	1	148	22033	243	39009	transcript_HQ_HBZL_transcript15810/f2p0/1622,transcript_HQ_HBZL_transcript19425/f3p0/1308,transcript_HQ_SCJY_transcript12821/f2p0/1647,transcript_HQ_YNMLP_transcript8891/f2p0/2494,transcript_HQ_HBZL_transcript19652/f6p0/1296,transcript_HQ_HBZL_transcript19409/f3p0/1305,transcript_HQ_YNLB_transcript15747/f2p0/1555,transcript_HQ_HBZL_transcript12016/f3p0/1877,transcript_HQ_HBZL_transcript17536/f3p0…
GO:0050660	flavin adenine dinucleotide binding	molecular_function	0.073294	1	201	22033	330	39009	transcript_HQ_HBZL_transcript11541/f2p0/1937,transcript_HQ_HBZL_transcript13345/f2p0/1803,transcript_HQ_HBZL_transcript10023/f4p0/2035,transcript_HQ_HBZL_transcript8286/f2p0/2194,transcript_HQ_YNLB_transcript11554/f2p0/2053,transcript_HQ_YNLB_transcript13933/f6p0/1676,transcript_HQ_SCJY_transcript8186/f2p0/2123,transcript_HQ_YNMLP_transcript12700/f2p0/2093,transcript_HQ_HBZL_transcript7880/f2p0/2…
GO:0008289	lipid binding	molecular_function	0.073326	1	261	22033	433	39009	transcript_HQ_YNLB_transcript10346/f3p0/2142,transcript_HQ_YNLB_transcript18041/f52p0/1203,transcript_HQ_HBZL_transcript1180/f3p0/3626,transcript_HQ_YNLB_transcript11840/f2p0/1976,transcript_HQ_SCJY_transcript2864/f2p0/2810,transcript_HQ_YNLB_transcript12792/f2p0/1865,transcript_HQ_YNLB_transcript22222/f2p0/695,transcript_HQ_YNLB_transcript13411/f2p0/1801,transcript_HQ_YNMLP_transcript11636/f8p0/…
GO:0006576	cellular biogenic amine metabolic process	biological_process	0.073761	1	102	22033	164	39009	transcript_HQ_YNLB_transcript12100/f49p0/1892,transcript_HQ_YNMLP_transcript6416/f9p0/2755,transcript_HQ_YNLB_transcript5283/f13p0/2706,transcript_HQ_SCJY_transcript10230/f8p0/1923,transcript_HQ_YNLB_transcript620/f3p0/4308,transcript_HQ_YNMLP_transcript18931/f3p0/1336,transcript_LQ_SCJY_transcript16839/f2p0/1105,transcript_HQ_HBZL_transcript21163/f6p0/1127,transcript_HQ_YNLB_transcript574/f3p0/4…
GO:0044106	cellular amine metabolic process	biological_process	0.073761	1	102	22033	164	39009	transcript_HQ_YNMLP_transcript21006/f2p0/1095,transcript_HQ_YNMLP_transcript7166/f9p0/2738,transcript_HQ_HBZL_transcript18080/f3p0/1440,transcript_HQ_YNMLP_transcript20404/f2p0/1152,transcript_HQ_YNMLP_transcript21395/f3p0/1001,transcript_HQ_SCJY_transcript18482/f3p0/930,transcript_HQ_YNMLP_transcript13816/f47p0/1919,transcript_HQ_HBZL_transcript22284/f7p0/1022,transcript_HQ_HBZL_transcript13418/…
GO:0000377	RNA splicing, via transesterification reactions with bulged adenosine as nucleophile	biological_process	0.07409	1	89	22033	143	39009	transcript_HQ_YNLB_transcript20739/f8p0/866,transcript_HQ_HBZL_transcript3858/f2p0/2775,transcript_HQ_YNLB_transcript20209/f2p0/936,transcript_HQ_SCJY_transcript14063/f3p0/1479,transcript_HQ_YNMLP_transcript21230/f2p0/1064,transcript_HQ_HBZL_transcript6520/f2p0/2380,transcript_HQ_HBZL_transcript16775/f2p0/1557,transcript_HQ_YNLB_transcript15345/f2p0/1585,transcript_HQ_YNLB_transcript26/f2p0/7447,…
GO:0000398	mRNA splicing, via spliceosome	biological_process	0.07409	1	89	22033	143	39009	transcript_HQ_SCJY_transcript21098/f4p0/653,transcript_HQ_YNLB_transcript13728/f5p0/1783,transcript_HQ_HBZL_transcript24229/f13p0/766,transcript_HQ_SCEZ_transcript15997/f2p0/1589,transcript_HQ_HBZL_transcript3006/f2p0/2948,transcript_HQ_SCEZ_transcript12894/f2p0/1791,transcript_HQ_SCJY_transcript13580/f2p0/1590,transcript_HQ_YNLB_transcript21349/f2p0/799,transcript_HQ_HBZL_transcript13627/f3p0/18…
GO:0004064	arylesterase activity	molecular_function	0.074623	1	7	22033	8	39009	transcript_HQ_HBZL_transcript5853/f20p0/2457,transcript_HQ_HBZL_transcript6476/f6p0/2389,transcript_HQ_HBZL_transcript6790/f4p0/2368,transcript_HQ_YNMLP_transcript19163/f2p0/1331,transcript_HQ_YNLB_transcript17707/f2p0/1253,transcript_HQ_HBZL_transcript19357/f2p0/1315,transcript_HQ_HBZL_transcript20181/f21p0/1249
GO:0071949	FAD binding	molecular_function	0.07474	1	89	22033	140	39009	transcript_HQ_YNMLP_transcript24/f5p0/7469,transcript_HQ_YNLB_transcript9467/f31p0/2200,transcript_HQ_HBZL_transcript7274/f2p0/2312,transcript_HQ_HBZL_transcript6460/f2p0/2409,transcript_HQ_YNMLP_transcript5820/f2p0/2836,transcript_HQ_HBZL_transcript38/f2p0/6592,transcript_HQ_YNMLP_transcript14646/f11p0/1847,transcript_HQ_HBZL_transcript12009/f2p0/1942,transcript_HQ_YNMLP_transcript12697/f2p0/208…
GO:0009379	Holliday junction helicase complex	cellular_component	0.075348	1	7	22033	8	39009	transcript_HQ_SCJY_transcript9293/f3p0/2008,transcript_HQ_HBZL_transcript10428/f2p0/2080,transcript_HQ_HBZL_transcript3289/f4p0/2882,transcript_HQ_YNMLP_transcript12685/f2p0/2115,transcript_HQ_HBZL_transcript17634/f9p0/1481,transcript_HQ_YNLB_transcript5600/f2p0/2661,transcript_HQ_HBZL_transcript13932/f3p0/1753
GO:0048476	Holliday junction resolvase complex	cellular_component	0.075348	1	7	22033	8	39009	transcript_HQ_HBZL_transcript17634/f9p0/1481,transcript_HQ_YNLB_transcript5600/f2p0/2661,transcript_HQ_HBZL_transcript13932/f3p0/1753,transcript_HQ_HBZL_transcript10428/f2p0/2080,transcript_HQ_SCJY_transcript9293/f3p0/2008,transcript_HQ_HBZL_transcript3289/f4p0/2882,transcript_HQ_YNMLP_transcript12685/f2p0/2115
GO:0000956	nuclear-transcribed mRNA catabolic process	biological_process	0.076388	1	30	22033	44	39009	transcript_HQ_HBZL_transcript17567/f3p0/1546,transcript_HQ_SCJY_transcript16185/f3p0/1171,transcript_HQ_HBZL_transcript240/f2p0/4922,transcript_HQ_YNLB_transcript5226/f3p0/2703,transcript_HQ_HBZL_transcript20337/f3p0/1217,transcript_HQ_SCJY_transcript15979/f3p0/1224,transcript_HQ_HBZL_transcript19134/f2p0/1345,transcript_HQ_HBZL_transcript20631/f48p0/1156,transcript_HQ_YNLB_transcript17080/f3p0/1…
GO:0044255	cellular lipid metabolic process	biological_process	0.077426	1	395	22033	665	39009	transcript_HQ_YNLB_transcript6831/f3p0/2492,transcript_HQ_YNLB_transcript15136/f6p0/1604,transcript_HQ_YNMLP_transcript15491/f4p0/1747,transcript_HQ_YNMLP_transcript13073/f2p0/2024,transcript_HQ_HBZL_transcript4688/f2p0/2635,transcript_LQ_YNMLP_transcript24402/f2p0/768,transcript_HQ_YNMLP_transcript20114/f2p0/1190,transcript_HQ_HBZL_transcript10105/f2p0/2029,transcript_HQ_YNLB_transcript2944/f2p0…
GO:0031325	positive regulation of cellular metabolic process	biological_process	0.07783	1	114	22033	184	39009	transcript_HQ_HBZL_transcript16738/f2p0/1555,transcript_HQ_HBZL_transcript455/f3p0/4300,transcript_HQ_YNMLP_transcript20317/f2p0/1160,transcript_HQ_HBZL_transcript1925/f2p0/3331,transcript_HQ_YNLB_transcript15684/f2p0/1570,transcript_HQ_SCEZ_transcript5029/f6p0/2524,transcript_HQ_HBZL_transcript3699/f4p0/2815,transcript_HQ_YNLB_transcript18109/f2p0/1225,transcript_HQ_YNLB_transcript13661/f2p0/177…
GO:0009267	cellular response to starvation	biological_process	0.078164	1	20	22033	29	39009	transcript_HQ_HBZL_transcript24709/f2p0/748,transcript_HQ_HBZL_transcript160/f2p0/5350,transcript_HQ_YNMLP_transcript25443/f9p0/638,transcript_HQ_YNMLP_transcript24622/f7p0/717,transcript_HQ_HBZL_transcript3649/f2p0/2802,transcript_HQ_HBZL_transcript3400/f2p0/2888,transcript_HQ_HBZL_transcript24432/f3p0/767,transcript_HQ_YNMLP_transcript23989/f8p0/793,transcript_HQ_YNMLP_transcript9948/f3p0/2370,…
GO:0031667	response to nutrient levels	biological_process	0.078164	1	20	22033	29	39009	transcript_HQ_YNLB_transcript21837/f3p0/741,transcript_HQ_HBZL_transcript24855/f5p0/725,transcript_HQ_SCEZ_transcript22641/f2p0/919,transcript_HQ_YNLB_transcript22101/f2p0/700,transcript_HQ_HBZL_transcript25317/f6p0/680,transcript_HQ_HBZL_transcript25794/f2p0/647,transcript_HQ_HBZL_transcript3728/f5p0/2796,transcript_HQ_SCEZ_transcript25613/f3p0/583,transcript_HQ_HBZL_transcript24709/f2p0/748,tra…
GO:0031669	cellular response to nutrient levels	biological_process	0.078164	1	20	22033	29	39009	transcript_HQ_HBZL_transcript160/f2p0/5350,transcript_HQ_HBZL_transcript24709/f2p0/748,transcript_HQ_YNMLP_transcript24622/f7p0/717,transcript_HQ_YNMLP_transcript25443/f9p0/638,transcript_HQ_HBZL_transcript3649/f2p0/2802,transcript_HQ_HBZL_transcript3400/f2p0/2888,transcript_HQ_YNMLP_transcript9948/f3p0/2370,transcript_HQ_YNMLP_transcript23989/f8p0/793,transcript_HQ_HBZL_transcript24432/f3p0/767,…
GO:0042594	response to starvation	biological_process	0.078164	1	20	22033	29	39009	transcript_HQ_HBZL_transcript25794/f2p0/647,transcript_HQ_HBZL_transcript3728/f5p0/2796,transcript_HQ_SCEZ_transcript25613/f3p0/583,transcript_HQ_HBZL_transcript25317/f6p0/680,transcript_HQ_HBZL_transcript24855/f5p0/725,transcript_HQ_SCEZ_transcript22641/f2p0/919,transcript_HQ_YNLB_transcript22101/f2p0/700,transcript_HQ_YNLB_transcript21837/f3p0/741,transcript_HQ_YNMLP_transcript23925/f5p0/802,tr…
GO:0045861	negative regulation of proteolysis	biological_process	0.078171	1	20	22033	28	39009	transcript_HQ_YNLB_transcript22471/f3p0/679,transcript_HQ_YNLB_transcript17860/f2p0/1225,transcript_HQ_SCJY_transcript10115/f5p0/1922,transcript_HQ_HBZL_transcript7062/f2p0/2323,transcript_HQ_HBZL_transcript21704/f2p0/1070,transcript_HQ_HBZL_transcript21/f2p0/7062,transcript_HQ_SCJY_transcript19801/f2p0/788,transcript_HQ_YNLB_transcript16022/f3p0/1517,transcript_HQ_HBZL_transcript3113/f7p0/2949,t…
GO:0043086	negative regulation of catalytic activity	biological_process	0.079	1	32	22033	48	39009	transcript_HQ_YNMLP_transcript18728/f2p0/1363,transcript_HQ_YNMLP_transcript25236/f3p0/685,transcript_HQ_YNLB_transcript23567/f2p0/547,transcript_HQ_SCJY_transcript19926/f2p0/777,transcript_HQ_YNMLP_transcript17903/f2p0/1497,transcript_HQ_HBZL_transcript24502/f2p0/758,transcript_HQ_HBZL_transcript26513/f9p0/566,transcript_HQ_SCEZ_transcript19783/f4p0/1209,transcript_HQ_HBZL_transcript315/f2p0/464…
GO:0044092	negative regulation of molecular function	biological_process	0.079	1	32	22033	48	39009	transcript_HQ_HBZL_transcript24502/f2p0/758,transcript_HQ_SCEZ_transcript19783/f4p0/1209,transcript_HQ_HBZL_transcript315/f2p0/4645,transcript_HQ_HBZL_transcript26513/f9p0/566,transcript_HQ_YNLB_transcript48/f2p0/6942,transcript_HQ_YNLB_transcript18947/f2p0/1046,transcript_HQ_YNMLP_transcript18728/f2p0/1363,transcript_HQ_YNMLP_transcript25236/f3p0/685,transcript_HQ_YNLB_transcript23567/f2p0/547,t…
GO:0015969	guanosine tetraphosphate metabolic process	biological_process	0.079285	1	19	22033	26	39009	transcript_HQ_YNMLP_transcript3977/f9p0/3095,transcript_HQ_YNMLP_transcript2827/f4p0/3425,transcript_HQ_YNMLP_transcript7297/f3p0/2653,transcript_HQ_YNMLP_transcript4665/f2p0/2956,transcript_HQ_HBZL_transcript1560/f5p0/3438,transcript_HQ_HBZL_transcript1408/f2p0/3511,transcript_HQ_HBZL_transcript2453/f2p0/3111,transcript_HQ_SCEZ_transcript10665/f2p0/1974,transcript_HQ_HBZL_transcript18786/f2p0/13…
GO:0034035	purine ribonucleoside bisphosphate metabolic process	biological_process	0.079285	1	19	22033	26	39009	transcript_HQ_YNLB_transcript6362/f6p0/2660,transcript_HQ_SCJY_transcript5100/f2p0/2543,transcript_HQ_HBZL_transcript2197/f2p0/3199,transcript_HQ_YNLB_transcript10716/f2p0/2076,transcript_HQ_HBZL_transcript3394/f11p0/2890,transcript_HQ_YNLB_transcript3359/f3p0/3021,transcript_HQ_YNLB_transcript2024/f2p0/3428,transcript_HQ_YNMLP_transcript11858/f2p0/2189,transcript_HQ_YNMLP_transcript2617/f2p0/341…
GO:0003989	acetyl-CoA carboxylase activity	molecular_function	0.079578	1	10	22033	12	39009	transcript_HQ_HBZL_transcript16/f2p0/7482,transcript_HQ_YNLB_transcript2754/f3p0/3209,transcript_HQ_HBZL_transcript18/f2p0/7347,transcript_HQ_HBZL_transcript2646/f5p0/3055,transcript_HQ_YNMLP_transcript4520/f2p0/3030,transcript_HQ_SCJY_transcript3789/f2p0/2640,transcript_HQ_SCEZ_transcript19/f3p0/7436,transcript_HQ_YNLB_transcript23/f2p0/7448,transcript_HQ_YNLB_transcript3150/f3p0/3092,transcript…
GO:0016421	CoA carboxylase activity	molecular_function	0.079578	1	10	22033	12	39009	transcript_HQ_HBZL_transcript16/f2p0/7482,transcript_HQ_HBZL_transcript2646/f5p0/3055,transcript_HQ_HBZL_transcript18/f2p0/7347,transcript_HQ_YNLB_transcript2754/f3p0/3209,transcript_HQ_SCJY_transcript3789/f2p0/2640,transcript_HQ_YNMLP_transcript4520/f2p0/3030,transcript_HQ_SCEZ_transcript19/f3p0/7436,transcript_HQ_YNLB_transcript23/f2p0/7448,transcript_HQ_HBZL_transcript2783/f4p0/3008,transcript…
GO:0016885	ligase activity, forming carbon-carbon bonds	molecular_function	0.079578	1	10	22033	12	39009	transcript_HQ_YNLB_transcript2754/f3p0/3209,transcript_HQ_HBZL_transcript18/f2p0/7347,transcript_HQ_HBZL_transcript2646/f5p0/3055,transcript_HQ_HBZL_transcript16/f2p0/7482,transcript_HQ_SCEZ_transcript19/f3p0/7436,transcript_HQ_SCJY_transcript3789/f2p0/2640,transcript_HQ_YNMLP_transcript4520/f2p0/3030,transcript_HQ_YNLB_transcript3150/f3p0/3092,transcript_HQ_HBZL_transcript2783/f4p0/3008,transcri…
GO:0004557	alpha-galactosidase activity	molecular_function	0.079644	1	9	22033	11	39009	transcript_HQ_HBZL_transcript4290/f2p0/2692,transcript_HQ_HBZL_transcript17296/f2p0/1506,transcript_HQ_YNMLP_transcript3362/f2p0/3224,transcript_HQ_HBZL_transcript16862/f2p0/1543,transcript_HQ_HBZL_transcript12699/f2p0/1851,transcript_HQ_YNMLP_transcript10042/f2p0/2374,transcript_HQ_HBZL_transcript11599/f2p0/1907,transcript_HQ_YNMLP_transcript17679/f3p0/1553,transcript_HQ_HBZL_transcript16594/f2p…
GO:0030162	regulation of proteolysis	biological_process	0.079944	1	25	22033	36	39009	transcript_HQ_SCEZ_transcript19783/f4p0/1209,transcript_HQ_HBZL_transcript30/f3p0/6883,transcript_HQ_HBZL_transcript5855/f2p0/2521,transcript_HQ_YNLB_transcript18947/f2p0/1046,transcript_HQ_YNMLP_transcript1108/f2p0/4014,transcript_HQ_YNMLP_transcript526/f2p0/4518,transcript_HQ_HBZL_transcript25716/f17p0/638,transcript_HQ_YNLB_transcript48/f2p0/6942,transcript_HQ_HBZL_transcript1400/f2p0/3502,tra…
GO:0032553	ribonucleotide binding	molecular_function	0.080271	1	3504	22033	6042	39009	transcript_HQ_HBZL_transcript17220/f4p0/1515,transcript_HQ_HBZL_transcript3512/f5p0/2815,transcript_HQ_HBZL_transcript240/f2p0/4922,transcript_HQ_SCJY_transcript3096/f7p0/2772,transcript_HQ_YNMLP_transcript16846/f4p0/1615,transcript_HQ_YNMLP_transcript5786/f2p0/2885,transcript_HQ_YNMLP_transcript14442/f2p0/1876,transcript_HQ_SCJY_transcript72/f8p0/4920,transcript_HQ_YNMLP_transcript8106/f7p0/2552…
nscript_HQ_HBZL_transcript5580/f3p0/2504,transcript_HQ_SCJY_transcript3277/f7p0/2747,transcript_HQ_YNMLP_transcript9561/f5p0/2424,transcript_HQ_HBZL_transcript5356/f15p0/2540,transcript_HQ_YNLB_transcript806/f2p0/4221,transcript_HQ_YNLB_transcript7727/f21p0/2430,transcript_HQ_HBZL_transcript3360/f5p0/2869,transcript_HQ_HBZL_transcript4340/f3p0/2687,transcript_HQ_YNLB_transcript255/f2p0/5142,trans…
p0/2148,transcript_HQ_YNMLP_transcript7704/f2p0/2707,transcript_HQ_HBZL_transcript16388/f2p0/1577,transcript_HQ_YNLB_transcript20015/f2p0/997,transcript_HQ_YNLB_transcript13228/f11p0/1822,transcript_HQ_SCJY_transcript7630/f3p0/2196,transcript_HQ_YNMLP_transcript1023/f7p0/4035,transcript_HQ_YNMLP_transcript8878/f2p0/2471,transcript_HQ_YNMLP_transcript22604/f6p0/934,transcript_HQ_YNMLP_transcript12…
transcript11412/f3p0/2217,transcript_HQ_YNLB_transcript11531/f3p0/1998,transcript_HQ_HBZL_transcript1654/f6p0/3411,transcript_HQ_HBZL_transcript12425/f2p0/1851,transcript_HQ_HBZL_transcript4868/f2p0/2594,transcript_HQ_HBZL_transcript11561/f2p0/1989,transcript_HQ_SCJY_transcript13887/f2p0/1497,transcript_HQ_YNLB_transcript13573/f3p0/1788,transcript_HQ_HBZL_transcript14209/f2p0/1771,transcript_HQ_S…
nscript7893/f3p0/2272,transcript_HQ_YNLB_transcript2156/f2p0/3375,transcript_HQ_YNMLP_transcript280/f4p0/5260,transcript_HQ_YNMLP_transcript16758/f5p0/1635,transcript_HQ_SCJY_transcript14512/f2p0/1410,transcript_HQ_SCJY_transcript8575/f2p0/2081,transcript_HQ_HBZL_transcript402/f2p0/4423,transcript_HQ_YNLB_transcript1237/f2p0/3880,transcript_HQ_YNMLP_transcript16137/f2p0/1691,transcript_HQ_SCJY_tr…
GO:0006397	mRNA processing	biological_process	0.080419	1	217	22033	360	39009	transcript_HQ_SCJY_transcript14063/f3p0/1479,transcript_HQ_YNLB_transcript20739/f8p0/866,transcript_HQ_HBZL_transcript3905/f7p0/2707,transcript_HQ_HBZL_transcript6520/f2p0/2380,transcript_HQ_HBZL_transcript14061/f2p0/1748,transcript_HQ_SCJY_transcript15020/f2p0/1350,transcript_HQ_HBZL_transcript8003/f2p0/2228,transcript_HQ_HBZL_transcript24849/f2p0/698,transcript_HQ_YNLB_transcript15345/f2p0/1585…
GO:0004674	protein serine/threonine kinase activity	molecular_function	0.080667	1	164	22033	266	39009	transcript_HQ_HBZL_transcript7687/f5p0/2256,transcript_HQ_YNLB_transcript2285/f3p0/3329,transcript_HQ_YNLB_transcript6242/f3p0/2629,transcript_HQ_SCJY_transcript8592/f3p0/2132,transcript_HQ_SCEZ_transcript4999/f2p0/2571,transcript_HQ_YNMLP_transcript13121/f2p0/2034,transcript_HQ_SCJY_transcript1278/f2p0/3260,transcript_HQ_YNLB_transcript10691/f2p0/2146,transcript_HQ_HBZL_transcript6021/f12p0/2484…
GO:0004383	guanylate cyclase activity	molecular_function	0.082828	1	4	22033	4	39009	transcript_HQ_SCJY_transcript19530/f2p0/825,transcript_HQ_SCEZ_transcript23678/f5p0/794,transcript_HQ_YNMLP_transcript23042/f4p0/829,transcript_HQ_YNMLP_transcript23645/f3p0/832
GO:0006182	cGMP biosynthetic process	biological_process	0.082828	1	4	22033	4	39009	transcript_HQ_SCJY_transcript19530/f2p0/825,transcript_HQ_SCEZ_transcript23678/f5p0/794,transcript_HQ_YNMLP_transcript23042/f4p0/829,transcript_HQ_YNMLP_transcript23645/f3p0/832
GO:0046068	cGMP metabolic process	biological_process	0.082828	1	4	22033	4	39009	transcript_HQ_YNMLP_transcript23645/f3p0/832,transcript_HQ_YNMLP_transcript23042/f4p0/829,transcript_HQ_SCEZ_transcript23678/f5p0/794,transcript_HQ_SCJY_transcript19530/f2p0/825
GO:0014065	phosphatidylinositol 3-kinase signaling	biological_process	0.083778	1	7	22033	8	39009	transcript_HQ_SCJY_transcript7658/f2p0/2217,transcript_HQ_YNLB_transcript1245/f2p0/3796,transcript_HQ_HBZL_transcript8284/f7p0/2189,transcript_HQ_YNMLP_transcript1287/f4p0/3905,transcript_HQ_YNLB_transcript10385/f2p0/2116,transcript_HQ_HBZL_transcript6823/f3p0/2348,transcript_HQ_HBZL_transcript1324/f2p0/3564
GO:0014066	regulation of phosphatidylinositol 3-kinase signaling	biological_process	0.083778	1	7	22033	8	39009	transcript_HQ_HBZL_transcript1324/f2p0/3564,transcript_HQ_HBZL_transcript6823/f3p0/2348,transcript_HQ_YNLB_transcript10385/f2p0/2116,transcript_HQ_YNMLP_transcript1287/f4p0/3905,transcript_HQ_HBZL_transcript8284/f7p0/2189,transcript_HQ_SCJY_transcript7658/f2p0/2217,transcript_HQ_YNLB_transcript1245/f2p0/3796
GO:0014068	positive regulation of phosphatidylinositol 3-kinase signaling	biological_process	0.083778	1	7	22033	8	39009	transcript_HQ_HBZL_transcript6823/f3p0/2348,transcript_HQ_YNLB_transcript10385/f2p0/2116,transcript_HQ_HBZL_transcript1324/f2p0/3564,transcript_HQ_YNMLP_transcript1287/f4p0/3905,transcript_HQ_HBZL_transcript8284/f7p0/2189,transcript_HQ_SCJY_transcript7658/f2p0/2217,transcript_HQ_YNLB_transcript1245/f2p0/3796
GO:0043548	phosphatidylinositol 3-kinase binding	molecular_function	0.083778	1	7	22033	8	39009	transcript_HQ_HBZL_transcript8284/f7p0/2189,transcript_HQ_SCJY_transcript7658/f2p0/2217,transcript_HQ_YNLB_transcript1245/f2p0/3796,transcript_HQ_HBZL_transcript1324/f2p0/3564,transcript_HQ_HBZL_transcript6823/f3p0/2348,transcript_HQ_YNLB_transcript10385/f2p0/2116,transcript_HQ_YNMLP_transcript1287/f4p0/3905
GO:0048015	phosphatidylinositol-mediated signaling	biological_process	0.083778	1	7	22033	8	39009	transcript_HQ_YNMLP_transcript1287/f4p0/3905,transcript_HQ_HBZL_transcript1324/f2p0/3564,transcript_HQ_HBZL_transcript6823/f3p0/2348,transcript_HQ_YNLB_transcript10385/f2p0/2116,transcript_HQ_YNLB_transcript1245/f2p0/3796,transcript_HQ_SCJY_transcript7658/f2p0/2217,transcript_HQ_HBZL_transcript8284/f7p0/2189
GO:0048017	inositol lipid-mediated signaling	biological_process	0.083778	1	7	22033	8	39009	transcript_HQ_HBZL_transcript1324/f2p0/3564,transcript_HQ_YNLB_transcript10385/f2p0/2116,transcript_HQ_HBZL_transcript6823/f3p0/2348,transcript_HQ_YNMLP_transcript1287/f4p0/3905,transcript_HQ_HBZL_transcript8284/f7p0/2189,transcript_HQ_YNLB_transcript1245/f2p0/3796,transcript_HQ_SCJY_transcript7658/f2p0/2217
GO:0019030	icosahedral viral capsid	cellular_component	0.083976	1	4	22033	4	39009	transcript_HQ_YNLB_transcript10333/f3p0/2136,transcript_HQ_YNLB_transcript22612/f11p0/648,transcript_HQ_SCJY_transcript20547/f2p0/722,transcript_HQ_YNMLP_transcript24443/f2p0/735
GO:0006448	regulation of translational elongation	biological_process	0.084893	1	15	22033	21	39009	transcript_HQ_YNMLP_transcript21956/f3p0/985,transcript_HQ_YNLB_transcript20540/f8p0/890,transcript_HQ_YNMLP_transcript23040/f8p0/894,transcript_HQ_HBZL_transcript22561/f5p0/970,transcript_HQ_YNLB_transcript20482/f3p0/947,transcript_HQ_YNMLP_transcript21786/f5p0/1005,transcript_HQ_YNLB_transcript21403/f3p0/788,transcript_HQ_YNLB_transcript20555/f12p0/880,transcript_HQ_YNLB_transcript19327/f3p0/10…
GO:0050790	regulation of catalytic activity	biological_process	0.085494	1	54	22033	85	39009	transcript_HQ_HBZL_transcript18132/f7p0/1435,transcript_HQ_YNLB_transcript22860/f2p0/631,transcript_HQ_HBZL_transcript21239/f2p0/1108,transcript_HQ_HBZL_transcript877/f2p0/3847,transcript_HQ_YNMLP_transcript261/f2p0/5260,transcript_HQ_HBZL_transcript22396/f2p0/1018,transcript_HQ_SCEZ_transcript13904/f2p0/1722,transcript_HQ_YNMLP_transcript1108/f2p0/4014,transcript_HQ_YNMLP_transcript7646/f2p0/271…
GO:0016703	oxidoreductase activity, acting on single donors with incorporation of molecular oxygen, incorporation of one atom of oxygen (internal monooxygenases or internal mixed function oxidases)	molecular_function	0.086726	1	49	22033	76	39009	transcript_HQ_YNLB_transcript17667/f2p0/1266,transcript_HQ_HBZL_transcript20895/f9p0/1163,transcript_HQ_HBZL_transcript19750/f2p0/1276,transcript_HQ_SCJY_transcript15203/f4p0/1334,transcript_HQ_YNLB_transcript12798/f3p0/1874,transcript_HQ_HBZL_transcript13160/f3p0/1805,transcript_HQ_HBZL_transcript11518/f15p0/1906,transcript_HQ_YNMLP_transcript20262/f2p0/1201,transcript_HQ_YNMLP_transcript18664/f…
GO:0000213	tRNA-intron endonuclease activity	molecular_function	0.087814	1	7	22033	8	39009	transcript_HQ_YNMLP_transcript3037/f3p0/3333,transcript_HQ_YNMLP_transcript2119/f2p0/3568,transcript_HQ_YNMLP_transcript2794/f2p0/3377,transcript_HQ_HBZL_transcript6898/f2p0/2361,transcript_HQ_YNMLP_transcript1364/f2p0/3848,transcript_HQ_YNLB_transcript1395/f2p0/3710,transcript_HQ_YNLB_transcript10614/f3p0/2112
GO:0006760	folic acid-containing compound metabolic process	biological_process	0.089583	1	29	22033	43	39009	transcript_HQ_SCJY_transcript17408/f5p0/1044,transcript_HQ_YNMLP_transcript3834/f4p0/3128,transcript_HQ_YNMLP_transcript20685/f2p0/1080,transcript_HQ_YNLB_transcript17396/f2p0/1307,transcript_HQ_HBZL_transcript25751/f7p0/640,transcript_HQ_HBZL_transcript3965/f2p0/2752,transcript_HQ_SCEZ_transcript19387/f12p0/1245,transcript_HQ_HBZL_transcript2695/f6p0/3030,transcript_HQ_HBZL_transcript5993/f3p0/2…
GO:0009288	bacterial-type flagellum	cellular_component	0.08974	1	31	22033	46	39009	transcript_HQ_HBZL_transcript20002/f9p0/1248,transcript_HQ_YNLB_transcript13661/f2p0/1776,transcript_HQ_HBZL_transcript2147/f3p0/3220,transcript_HQ_YNMLP_transcript724/f4p0/4334,transcript_HQ_YNLB_transcript10319/f3p0/2114,transcript_HQ_SCJY_transcript10344/f2p0/1902,transcript_HQ_YNMLP_transcript19200/f2p0/1255,transcript_HQ_YNMLP_transcript20954/f3p0/1086,transcript_HQ_YNLB_transcript17860/f2p0…
GO:0004612	phosphoenolpyruvate carboxykinase (ATP) activity	molecular_function	0.090904	1	18	22033	25	39009	transcript_HQ_YNMLP_transcript16246/f2p0/1683,transcript_HQ_HBZL_transcript6368/f5p0/2394,transcript_HQ_HBZL_transcript15160/f4p0/1711,transcript_HQ_HBZL_transcript6479/f14p0/2380,transcript_HQ_HBZL_transcript3258/f2p0/2888,transcript_HQ_HBZL_transcript6485/f11p0/2366,transcript_HQ_YNMLP_transcript10487/f2p0/2316,transcript_HQ_YNMLP_transcript10097/f2p0/2356,transcript_HQ_YNLB_transcript15419/f6p…
GO:0019220	regulation of phosphate metabolic process	biological_process	0.091229	1	14	22033	19	39009	transcript_HQ_YNLB_transcript19306/f2p0/1047,transcript_HQ_HBZL_transcript21239/f2p0/1108,transcript_HQ_HBZL_transcript1925/f2p0/3331,transcript_HQ_HBZL_transcript3400/f2p0/2888,transcript_HQ_HBZL_transcript3649/f2p0/2802,transcript_HQ_HBZL_transcript22396/f2p0/1018,transcript_HQ_HBZL_transcript20002/f9p0/1248,transcript_HQ_YNLB_transcript20608/f4p0/896,transcript_HQ_YNMLP_transcript3606/f2p0/330…
GO:0051174	regulation of phosphorus metabolic process	biological_process	0.091229	1	14	22033	19	39009	transcript_HQ_HBZL_transcript21239/f2p0/1108,transcript_HQ_HBZL_transcript1925/f2p0/3331,transcript_HQ_YNLB_transcript19306/f2p0/1047,transcript_HQ_YNLB_transcript20608/f4p0/896,transcript_HQ_HBZL_transcript20002/f9p0/1248,transcript_HQ_HBZL_transcript3649/f2p0/2802,transcript_HQ_HBZL_transcript3400/f2p0/2888,transcript_HQ_HBZL_transcript22396/f2p0/1018,transcript_HQ_HBZL_transcript21423/f8p0/110…
GO:0016413	O-acetyltransferase activity	molecular_function	0.092091	1	14	22033	19	39009	transcript_HQ_YNMLP_transcript19265/f5p0/1285,transcript_HQ_HBZL_transcript19461/f8p0/1296,transcript_HQ_HBZL_transcript18230/f2p0/1426,transcript_HQ_YNMLP_transcript2180/f2p0/3595,transcript_HQ_SCJY_transcript19155/f2p0/845,transcript_HQ_YNLB_transcript16492/f2p0/1434,transcript_HQ_HBZL_transcript19634/f4p0/1301,transcript_HQ_HBZL_transcript18007/f2p0/1450,transcript_HQ_YNMLP_transcript20906/f4p…
GO:0042559	pteridine-containing compound biosynthetic process	biological_process	0.093041	1	29	22033	43	39009	transcript_HQ_YNLB_transcript17396/f2p0/1307,transcript_HQ_YNMLP_transcript20685/f2p0/1080,transcript_HQ_YNMLP_transcript3834/f4p0/3128,transcript_HQ_SCJY_transcript17408/f5p0/1044,transcript_HQ_SCJY_transcript16952/f2p0/1089,transcript_HQ_SCEZ_transcript19103/f2p0/1302,transcript_HQ_HBZL_transcript21421/f6p0/1099,transcript_HQ_SCJY_transcript20387/f2p0/726,transcript_HQ_HBZL_transcript2695/f6p0/…
GO:0006449	regulation of translational termination	biological_process	0.093339	1	13	22033	18	39009	transcript_HQ_HBZL_transcript21835/f2p0/1077,transcript_HQ_HBZL_transcript23177/f5p0/895,transcript_HQ_SCJY_transcript18312/f6p0/929,transcript_HQ_HBZL_transcript23147/f12p0/906,transcript_HQ_YNMLP_transcript27424/f2p0/436,transcript_HQ_YNLB_transcript19327/f3p0/1038,transcript_HQ_YNLB_transcript20555/f12p0/880,transcript_HQ_YNMLP_transcript21786/f5p0/1005,transcript_HQ_YNLB_transcript20482/f3p0/…
GO:0006452	translational frameshifting	biological_process	0.093339	1	13	22033	18	39009	transcript_HQ_HBZL_transcript21835/f2p0/1077,transcript_HQ_SCJY_transcript18312/f6p0/929,transcript_HQ_HBZL_transcript23177/f5p0/895,transcript_HQ_HBZL_transcript23147/f12p0/906,transcript_HQ_YNMLP_transcript27424/f2p0/436,transcript_HQ_YNLB_transcript19327/f3p0/1038,transcript_HQ_YNLB_transcript20555/f12p0/880,transcript_HQ_YNMLP_transcript21786/f5p0/1005,transcript_HQ_YNLB_transcript20482/f3p0/…
GO:0034250	positive regulation of cellular amide metabolic process	biological_process	0.093339	1	13	22033	18	39009	transcript_HQ_YNMLP_transcript21786/f5p0/1005,transcript_HQ_YNLB_transcript20555/f12p0/880,transcript_HQ_YNLB_transcript20540/f8p0/890,transcript_HQ_YNMLP_transcript21956/f3p0/985,transcript_HQ_YNMLP_transcript23040/f8p0/894,transcript_HQ_HBZL_transcript22561/f5p0/970,transcript_HQ_YNLB_transcript20482/f3p0/947,transcript_HQ_HBZL_transcript23177/f5p0/895,transcript_HQ_SCJY_transcript18312/f6p0/92…
GO:0043243	positive regulation of protein complex disassembly	biological_process	0.093339	1	13	22033	18	39009	transcript_HQ_YNMLP_transcript21956/f3p0/985,transcript_HQ_YNLB_transcript20540/f8p0/890,transcript_HQ_YNMLP_transcript23040/f8p0/894,transcript_HQ_HBZL_transcript22561/f5p0/970,transcript_HQ_YNLB_transcript20482/f3p0/947,transcript_HQ_YNMLP_transcript21786/f5p0/1005,transcript_HQ_YNLB_transcript20555/f12p0/880,transcript_HQ_YNLB_transcript19327/f3p0/1038,transcript_HQ_YNMLP_transcript27424/f2p0/…
GO:0045727	positive regulation of translation	biological_process	0.093339	1	13	22033	18	39009	transcript_HQ_HBZL_transcript23147/f12p0/906,transcript_HQ_HBZL_transcript23177/f5p0/895,transcript_HQ_SCJY_transcript18312/f6p0/929,transcript_HQ_HBZL_transcript21835/f2p0/1077,transcript_HQ_YNLB_transcript19327/f3p0/1038,transcript_HQ_YNMLP_transcript27424/f2p0/436,transcript_HQ_YNMLP_transcript21786/f5p0/1005,transcript_HQ_YNLB_transcript20555/f12p0/880,transcript_HQ_YNMLP_transcript23040/f8p0…
GO:0045901	positive regulation of translational elongation	biological_process	0.093339	1	13	22033	18	39009	transcript_HQ_HBZL_transcript23147/f12p0/906,transcript_HQ_HBZL_transcript23177/f5p0/895,transcript_HQ_SCJY_transcript18312/f6p0/929,transcript_HQ_HBZL_transcript21835/f2p0/1077,transcript_HQ_YNLB_transcript19327/f3p0/1038,transcript_HQ_YNMLP_transcript27424/f2p0/436,transcript_HQ_YNMLP_transcript21786/f5p0/1005,transcript_HQ_YNLB_transcript20555/f12p0/880,transcript_HQ_YNMLP_transcript23040/f8p0…
GO:0045905	positive regulation of translational termination	biological_process	0.093339	1	13	22033	18	39009	transcript_HQ_YNMLP_transcript21786/f5p0/1005,transcript_HQ_YNLB_transcript20555/f12p0/880,transcript_HQ_YNLB_transcript20540/f8p0/890,transcript_HQ_YNMLP_transcript21956/f3p0/985,transcript_HQ_YNMLP_transcript23040/f8p0/894,transcript_HQ_YNLB_transcript20482/f3p0/947,transcript_HQ_HBZL_transcript22561/f5p0/970,transcript_HQ_HBZL_transcript23177/f5p0/895,transcript_HQ_SCJY_transcript18312/f6p0/92…
GO:0006534	cysteine metabolic process	biological_process	0.093558	1	12	22033	16	39009	transcript_HQ_HBZL_transcript19050/f3p0/1363,transcript_HQ_HBZL_transcript19946/f5p0/1255,transcript_HQ_HBZL_transcript20460/f2p0/1210,transcript_HQ_YNLB_transcript15071/f2p0/1616,transcript_HQ_HBZL_transcript18007/f2p0/1450,transcript_HQ_YNMLP_transcript20906/f4p0/1124,transcript_HQ_SCJY_transcript19155/f2p0/845,transcript_HQ_YNLB_transcript16492/f2p0/1434,transcript_HQ_HBZL_transcript19634/f4p0…
GO:0006535	cysteine biosynthetic process from serine	biological_process	0.093558	1	12	22033	16	39009	transcript_HQ_HBZL_transcript19050/f3p0/1363,transcript_HQ_HBZL_transcript19946/f5p0/1255,transcript_HQ_HBZL_transcript20460/f2p0/1210,transcript_HQ_YNLB_transcript15071/f2p0/1616,transcript_HQ_HBZL_transcript18007/f2p0/1450,transcript_HQ_YNMLP_transcript20906/f4p0/1124,transcript_HQ_SCJY_transcript19155/f2p0/845,transcript_HQ_YNLB_transcript16492/f2p0/1434,transcript_HQ_HBZL_transcript19634/f4p0…
GO:0006563	L-serine metabolic process	biological_process	0.093558	1	12	22033	16	39009	transcript_HQ_HBZL_transcript19461/f8p0/1296,transcript_HQ_YNMLP_transcript19265/f5p0/1285,transcript_HQ_HBZL_transcript18230/f2p0/1426,transcript_HQ_YNLB_transcript16492/f2p0/1434,transcript_HQ_SCJY_transcript19155/f2p0/845,transcript_HQ_HBZL_transcript19634/f4p0/1301,transcript_HQ_YNMLP_transcript20906/f4p0/1124,transcript_HQ_HBZL_transcript18007/f2p0/1450,transcript_HQ_HBZL_transcript19050/f3p…
GO:0009001	serine O-acetyltransferase activity	molecular_function	0.093558	1	12	22033	16	39009	transcript_HQ_HBZL_transcript19634/f4p0/1301,transcript_HQ_YNLB_transcript16492/f2p0/1434,transcript_HQ_SCJY_transcript19155/f2p0/845,transcript_HQ_HBZL_transcript18230/f2p0/1426,transcript_HQ_HBZL_transcript19461/f8p0/1296,transcript_HQ_YNMLP_transcript19265/f5p0/1285,transcript_HQ_HBZL_transcript20460/f2p0/1210,transcript_HQ_YNLB_transcript15071/f2p0/1616,transcript_HQ_HBZL_transcript19946/f5p0…
GO:0016412	serine O-acyltransferase activity	molecular_function	0.093558	1	12	22033	16	39009	transcript_HQ_SCJY_transcript19155/f2p0/845,transcript_HQ_YNLB_transcript16492/f2p0/1434,transcript_HQ_HBZL_transcript19634/f4p0/1301,transcript_HQ_YNMLP_transcript19265/f5p0/1285,transcript_HQ_HBZL_transcript19461/f8p0/1296,transcript_HQ_HBZL_transcript18230/f2p0/1426,transcript_HQ_HBZL_transcript19050/f3p0/1363,transcript_HQ_HBZL_transcript19946/f5p0/1255,transcript_HQ_YNLB_transcript15071/f2p0…
GO:0019344	cysteine biosynthetic process	biological_process	0.093558	1	12	22033	16	39009	transcript_HQ_HBZL_transcript18007/f2p0/1450,transcript_HQ_YNMLP_transcript20906/f4p0/1124,transcript_HQ_HBZL_transcript19050/f3p0/1363,transcript_HQ_HBZL_transcript19946/f5p0/1255,transcript_HQ_YNLB_transcript15071/f2p0/1616,transcript_HQ_HBZL_transcript20460/f2p0/1210,transcript_HQ_YNMLP_transcript19265/f5p0/1285,transcript_HQ_HBZL_transcript19461/f8p0/1296,transcript_HQ_HBZL_transcript18230/f2…
GO:0020037	heme binding	molecular_function	0.094293	1	445	22033	759	39009	transcript_HQ_HBZL_transcript19854/f3p0/1277,transcript_HQ_SCJY_transcript11134/f2p0/1807,transcript_HQ_SCJY_transcript12706/f2p0/1654,transcript_HQ_YNMLP_transcript18516/f2p0/1382,transcript_HQ_YNLB_transcript13381/f3p0/1805,transcript_HQ_HBZL_transcript15882/f4p0/1621,transcript_HQ_HBZL_transcript1838/f32p0/3307,transcript_HQ_HBZL_transcript12552/f2p0/1843,transcript_HQ_HBZL_transcript9889/f4p0…
GO:0043022	ribosome binding	molecular_function	0.094366	1	18	22033	26	39009	transcript_HQ_HBZL_transcript21835/f2p0/1077,transcript_HQ_HBZL_transcript23147/f12p0/906,transcript_HQ_SCJY_transcript18312/f6p0/929,transcript_HQ_HBZL_transcript13394/f13p0/1723,transcript_HQ_HBZL_transcript17211/f5p0/1522,transcript_HQ_YNLB_transcript18450/f2p0/1146,transcript_HQ_YNLB_transcript19327/f3p0/1038,transcript_HQ_HBZL_transcript21160/f3p0/1134,transcript_HQ_HBZL_transcript22561/f5p0…
GO:0071203	WASH complex	cellular_component	0.095354	1	20	22033	28	39009	transcript_HQ_SCJY_transcript10753/f4p0/1859,transcript_HQ_YNLB_transcript10332/f2p0/2168,transcript_HQ_HBZL_transcript1894/f5p0/3295,transcript_HQ_HBZL_transcript2165/f3p0/3227,transcript_HQ_HBZL_transcript1726/f14p0/3365,transcript_HQ_HBZL_transcript1771/f6p0/3347,transcript_HQ_YNLB_transcript8218/f9p0/2337,transcript_HQ_YNMLP_transcript2878/f2p0/3351,transcript_HQ_HBZL_transcript4753/f3p0/2628…
GO:0051287	NAD binding	molecular_function	0.09719	1	264	22033	444	39009	transcript_HQ_HBZL_transcript4555/f2p0/2657,transcript_HQ_HBZL_transcript13412/f2p0/1787,transcript_HQ_HBZL_transcript17728/f3p0/1464,transcript_HQ_SCJY_transcript14260/f5p0/1458,transcript_HQ_HBZL_transcript13499/f4p0/1776,transcript_HQ_HBZL_transcript18715/f4p0/1382,transcript_HQ_YNMLP_transcript10625/f2p0/2296,transcript_HQ_SCEZ_transcript19103/f2p0/1302,transcript_HQ_HBZL_transcript8492/f6p0/…
GO:0006730	one-carbon metabolic process	biological_process	0.097259	1	4	22033	4	39009	transcript_HQ_YNMLP_transcript22601/f4p0/925,transcript_HQ_HBZL_transcript24236/f3p0/792,transcript_HQ_HBZL_transcript2543/f2p0/3101,transcript_HQ_YNMLP_transcript6248/f3p0/2797
GO:0030313	cell envelope	cellular_component	0.097655	1	10	22033	13	39009	transcript_HQ_YNMLP_transcript25766/f2p0/628,transcript_HQ_YNMLP_transcript18698/f8p0/1349,transcript_HQ_YNLB_transcript5047/f3p0/2730,transcript_HQ_HBZL_transcript20179/f3p0/1258,transcript_HQ_SCEZ_transcript18545/f10p0/1329,transcript_HQ_SCJY_transcript15605/f2p0/1261,transcript_HQ_YNLB_transcript20486/f2p0/913,transcript_HQ_YNLB_transcript19765/f2p0/995,transcript_HQ_YNMLP_transcript19200/f2p0…
GO:0000394	RNA splicing, via endonucleolytic cleavage and ligation	biological_process	0.098043	1	18	22033	25	39009	transcript_HQ_YNLB_transcript3265/f3p0/3035,transcript_HQ_SCJY_transcript8666/f3p0/2066,transcript_HQ_YNMLP_transcript1074/f2p0/4010,transcript_HQ_YNMLP_transcript1364/f2p0/3848,transcript_HQ_HBZL_transcript6898/f2p0/2361,transcript_HQ_YNMLP_transcript2794/f2p0/3377,transcript_HQ_YNMLP_transcript3037/f3p0/3333,transcript_HQ_HBZL_transcript17425/f3p0/1001,transcript_HQ_YNLB_transcript1395/f2p0/371…
GO:0006388	tRNA splicing, via endonucleolytic cleavage and ligation	biological_process	0.098043	1	18	22033	25	39009	transcript_HQ_HBZL_transcript2249/f6p0/3207,transcript_HQ_YNLB_transcript10614/f3p0/2112,transcript_HQ_SCJY_transcript15775/f3p0/1239,transcript_HQ_HBZL_transcript1362/f2p0/3534,transcript_HQ_YNMLP_transcript2119/f2p0/3568,transcript_HQ_YNMLP_transcript1063/f2p0/4079,transcript_HQ_YNMLP_transcript4071/f3p0/3089,transcript_HQ_HBZL_transcript2596/f2p0/2995,transcript_HQ_YNMLP_transcript17578/f2p0/1…
GO:0007532	regulation of mating-type specific transcription, DNA-templated	biological_process	0.098712	1	4	22033	4	39009	transcript_HQ_YNMLP_transcript21819/f2p0/996,transcript_HQ_HBZL_transcript461/f2p0/4294,transcript_HQ_HBZL_transcript25728/f2p0/647,transcript_HQ_HBZL_transcript8889/f2p0/2139
GO:0008301	DNA binding, bending	molecular_function	0.098712	1	4	22033	4	39009	transcript_HQ_HBZL_transcript8889/f2p0/2139,transcript_HQ_HBZL_transcript25728/f2p0/647,transcript_HQ_YNMLP_transcript21819/f2p0/996,transcript_HQ_HBZL_transcript461/f2p0/4294
GO:0045895	positive regulation of mating-type specific transcription, DNA-templated	biological_process	0.098712	1	4	22033	4	39009	transcript_HQ_HBZL_transcript8889/f2p0/2139,transcript_HQ_HBZL_transcript25728/f2p0/647,transcript_HQ_YNMLP_transcript21819/f2p0/996,transcript_HQ_HBZL_transcript461/f2p0/4294
GO:0006269	DNA replication, synthesis of RNA primer	biological_process	0.099221	1	4	22033	4	39009	transcript_HQ_YNMLP_transcript19060/f2p0/1312,transcript_HQ_HBZL_transcript10783/f2p0/2000,transcript_HQ_YNLB_transcript15965/f5p0/1525,transcript_HQ_SCJY_transcript13993/f2p0/1507
GO:0003854	3-beta-hydroxy-delta5-steroid dehydrogenase activity	molecular_function	0.099442	1	142	22033	235	39009	transcript_HQ_YNLB_transcript15747/f2p0/1555,transcript_HQ_HBZL_transcript12016/f3p0/1877,transcript_HQ_HBZL_transcript19409/f3p0/1305,transcript_HQ_HBZL_transcript19652/f6p0/1296,transcript_HQ_YNMLP_transcript8891/f2p0/2494,transcript_HQ_SCJY_transcript12821/f2p0/1647,transcript_HQ_HBZL_transcript19425/f3p0/1308,transcript_HQ_HBZL_transcript15810/f2p0/1622,transcript_HQ_YNMLP_transcript15571/f2p…
GO:0016229	steroid dehydrogenase activity	molecular_function	0.099442	1	142	22033	235	39009	transcript_HQ_HBZL_transcript8357/f2p0/2159,transcript_HQ_HBZL_transcript14207/f4p0/1751,transcript_HQ_YNLB_transcript19195/f5p0/1068,transcript_HQ_YNLB_transcript12483/f6p0/1904,transcript_HQ_YNMLP_transcript15786/f2p0/1705,transcript_HQ_YNMLP_transcript19029/f4p0/1335,transcript_HQ_YNLB_transcript15438/f3p0/1585,transcript_HQ_YNMLP_transcript14274/f2p0/1892,transcript_HQ_YNMLP_transcript18496/f…
GO:0033764	steroid dehydrogenase activity, acting on the CH-OH group of donors, NAD or NADP as acceptor	molecular_function	0.099442	1	142	22033	235	39009	transcript_HQ_YNMLP_transcript3461/f2p0/3209,transcript_HQ_SCJY_transcript16708/f3p0/1127,transcript_HQ_HBZL_transcript18221/f6p0/1432,transcript_HQ_HBZL_transcript21203/f5p0/1132,transcript_HQ_HBZL_transcript17001/f4p0/1527,transcript_HQ_HBZL_transcript15210/f2p0/1679,transcript_HQ_YNMLP_transcript11880/f3p0/2186,transcript_HQ_YNMLP_transcript20038/f2p0/1192,transcript_HQ_HBZL_transcript13333/f1…
GO:0008283	cell proliferation	biological_process	0.099581	1	11	22033	15	39009	transcript_HQ_YNMLP_transcript27289/f2p0/457,transcript_HQ_YNLB_transcript19306/f2p0/1047,transcript_HQ_YNMLP_transcript21184/f4p0/1073,transcript_HQ_HBZL_transcript1925/f2p0/3331,transcript_HQ_YNMLP_transcript26870/f4p0/501,transcript_HQ_HBZL_transcript26397/f2p0/587,transcript_HQ_YNLB_transcript24212/f2p0/474,transcript_HQ_YNMLP_transcript3606/f2p0/3300,transcript_HQ_HBZL_transcript28169/f2p0/3…
GO:0033178	proton-transporting two-sector ATPase complex, catalytic domain	cellular_component	0.099902	1	85	22033	135	39009	transcript_HQ_HBZL_transcript18332/f5p0/1432,transcript_HQ_HBZL_transcript330/f4p0/4613,transcript_HQ_YNLB_transcript27/f4p0/7482,transcript_HQ_SCEZ_transcript12413/f4p0/1855,transcript_HQ_YNLB_transcript18557/f3p0/1142,transcript_HQ_HBZL_transcript556/f2p0/4176,transcript_HQ_SCJY_transcript7803/f8p0/2174,transcript_HQ_HBZL_transcript2459/f2p0/3101,transcript_HQ_YNLB_transcript15541/f5p0/1581,tra…
GO:0019900	kinase binding	molecular_function	0.099948	1	37	22033	56	39009	transcript_HQ_HBZL_transcript13627/f3p0/1817,transcript_HQ_HBZL_transcript21763/f3p0/1062,transcript_HQ_SCJY_transcript8515/f2p0/2092,transcript_HQ_YNLB_transcript13116/f8p0/1873,transcript_HQ_YNMLP_transcript11759/f2p0/2175,transcript_HQ_SCJY_transcript207/f2p0/4189,transcript_HQ_HBZL_transcript10327/f2p0/2014,transcript_HQ_HBZL_transcript1180/f3p0/3626,transcript_HQ_YNMLP_transcript1636/f2p0/37…
GO:0019901	protein kinase binding	molecular_function	0.099948	1	37	22033	56	39009	transcript_HQ_HBZL_transcript8143/f2p0/2221,transcript_HQ_SCJY_transcript8893/f5p0/2065,transcript_HQ_HBZL_transcript8110/f8p0/2261,transcript_HQ_HBZL_transcript8692/f2p0/2149,transcript_HQ_HBZL_transcript21667/f4p0/1102,transcript_HQ_SCEZ_transcript20801/f2p0/1112,transcript_HQ_YNMLP_transcript11497/f2p0/2189,transcript_HQ_HBZL_transcript11042/f2p0/1967,transcript_HQ_SCJY_transcript843/f2p0/3506…
GO:0046332	SMAD binding	molecular_function	0.10088	1	6	22033	7	39009	transcript_HQ_HBZL_transcript14077/f2p0/1742,transcript_HQ_SCJY_transcript17285/f2p0/1056,transcript_HQ_YNMLP_transcript21167/f7p0/1071,transcript_HQ_HBZL_transcript22718/f12p0/960,transcript_HQ_SCEZ_transcript21998/f2p0/990,transcript_HQ_HBZL_transcript22386/f5p0/978
GO:0019074	viral RNA genome packaging	biological_process	0.10127	1	4	22033	4	39009	transcript_HQ_HBZL_transcript11433/f4p0/1940,transcript_HQ_HBZL_transcript11886/f23p0/1922,transcript_HQ_SCJY_transcript10036/f3p0/1938,transcript_HQ_HBZL_transcript12565/f2p0/1917
GO:0009758	carbohydrate utilization	biological_process	0.10253	1	4	22033	4	39009	transcript_HQ_YNLB_transcript5983/f8p0/2648,transcript_HQ_YNMLP_transcript7221/f2p0/2672,transcript_HQ_YNLB_transcript18994/f3p0/1104,transcript_HQ_HBZL_transcript5358/f2p0/2527
GO:0050053	levansucrase activity	molecular_function	0.10253	1	4	22033	4	39009	transcript_HQ_YNLB_transcript5983/f8p0/2648,transcript_HQ_YNLB_transcript18994/f3p0/1104,transcript_HQ_HBZL_transcript5358/f2p0/2527,transcript_HQ_YNMLP_transcript7221/f2p0/2672
GO:0032787	monocarboxylic acid metabolic process	biological_process	0.10261	1	307	22033	517	39009	transcript_HQ_YNLB_transcript8976/f3p0/2258,transcript_HQ_HBZL_transcript5487/f6p0/2515,transcript_HQ_HBZL_transcript11490/f3p0/1933,transcript_HQ_HBZL_transcript1607/f2p0/3441,transcript_HQ_HBZL_transcript23549/f2p0/861,transcript_HQ_HBZL_transcript17187/f3p0/1519,transcript_HQ_YNMLP_transcript5062/f2p0/2922,transcript_HQ_YNMLP_transcript13455/f4p0/1945,transcript_HQ_YNMLP_transcript14982/f2p0/1…
GO:0006414	translational elongation	biological_process	0.10291	1	44	22033	69	39009	transcript_HQ_YNLB_transcript21403/f3p0/788,transcript_HQ_SCJY_transcript17910/f10p0/990,transcript_HQ_SCEZ_transcript21082/f2p0/1081,transcript_HQ_YNMLP_transcript20645/f2p0/1130,transcript_HQ_HBZL_transcript22024/f2p0/1038,transcript_HQ_YNLB_transcript18978/f2p0/1078,transcript_HQ_YNLB_transcript20540/f8p0/890,transcript_HQ_SCJY_transcript17840/f3p0/984,transcript_HQ_HBZL_transcript22561/f5p0/9…
GO:0070569	uridylyltransferase activity	molecular_function	0.10318	1	30	22033	45	39009	transcript_HQ_YNLB_transcript12874/f3p0/1838,transcript_HQ_HBZL_transcript21450/f10p0/1104,transcript_HQ_YNMLP_transcript14234/f10p0/1923,transcript_HQ_YNLB_transcript17751/f6p0/1228,transcript_HQ_HBZL_transcript17706/f2p0/1477,transcript_HQ_SCEZ_transcript7586/f2p0/2222,transcript_HQ_YNMLP_transcript14514/f7p0/1857,transcript_HQ_SCJY_transcript8377/f2p0/2139,transcript_HQ_HBZL_transcript20825/f4…
GO:0005516	calmodulin binding	molecular_function	0.1034	1	75	22033	118	39009	transcript_HQ_HBZL_transcript5125/f4p0/2602,transcript_HQ_YNMLP_transcript3005/f2p0/3301,transcript_HQ_HBZL_transcript7653/f8p0/2252,transcript_HQ_HBZL_transcript14533/f3p0/1713,transcript_HQ_SCJY_transcript6073/f3p0/2357,transcript_HQ_YNMLP_transcript6380/f2p0/2745,transcript_HQ_HBZL_transcript1057/f2p0/3751,transcript_HQ_YNMLP_transcript12299/f3p0/2151,transcript_HQ_SCJY_transcript2700/f4p0/284…
GO:0009108	coenzyme biosynthetic process	biological_process	0.10389	1	147	22033	241	39009	transcript_HQ_SCJY_transcript16854/f2p0/1149,transcript_HQ_YNLB_transcript4823/f3p0/2755,transcript_HQ_HBZL_transcript192/f2p0/5060,transcript_HQ_YNMLP_transcript17239/f2p0/1560,transcript_HQ_HBZL_transcript12113/f4p0/1879,transcript_HQ_YNLB_transcript17848/f4p0/1231,transcript_HQ_YNMLP_transcript3652/f2p0/3259,transcript_HQ_HBZL_transcript6021/f12p0/2484,transcript_HQ_HBZL_transcript15371/f10p0/…
GO:0009396	folic acid-containing compound biosynthetic process	biological_process	0.10391	1	27	22033	40	39009	transcript_HQ_SCJY_transcript17408/f5p0/1044,transcript_HQ_YNMLP_transcript3834/f4p0/3128,transcript_HQ_YNMLP_transcript20685/f2p0/1080,transcript_HQ_YNLB_transcript17396/f2p0/1307,transcript_HQ_HBZL_transcript5993/f3p0/2441,transcript_HQ_HBZL_transcript2695/f6p0/3030,transcript_HQ_SCEZ_transcript19387/f12p0/1245,transcript_HQ_HBZL_transcript3965/f2p0/2752,transcript_HQ_SCEZ_transcript19103/f2p0/…
GO:0035639	purine ribonucleoside triphosphate binding	molecular_function	0.10408	1	3394	22033	5858	39009	transcript_HQ_HBZL_transcript2125/f2p0/3265,transcript_HQ_YNLB_transcript6073/f2p0/2552,transcript_HQ_HBZL_transcript5943/f3p0/2462,transcript_HQ_YNMLP_transcript4246/f3p0/3051,transcript_HQ_YNMLP_transcript1181/f2p0/3946,transcript_HQ_YNLB_transcript895/f5p0/4051,transcript_HQ_YNLB_transcript2029/f5p0/3446,transcript_HQ_YNMLP_transcript6774/f5p0/2699,transcript_HQ_YNMLP_transcript4767/f3p0/2972,…
script616/f5p0/4460,transcript_HQ_YNLB_transcript6479/f3p0/2535,transcript_HQ_YNLB_transcript14558/f5p0/1685,transcript_HQ_HBZL_transcript5962/f2p0/2445,transcript_HQ_YNMLP_transcript10836/f3p0/2280,transcript_HQ_HBZL_transcript21605/f2p0/1073,transcript_HQ_YNLB_transcript112/f2p0/6058,transcript_HQ_YNLB_transcript11570/f4p0/1998,transcript_HQ_HBZL_transcript2095/f2p0/3230,transcript_HQ_YNLB_tran…
p0/2811,transcript_HQ_HBZL_transcript8818/f4p0/2136,transcript_HQ_SCJY_transcript15711/f2p0/1243,transcript_HQ_HBZL_transcript17550/f10p0/1508,transcript_HQ_HBZL_transcript4710/f2p0/2628,transcript_HQ_HBZL_transcript6410/f7p0/2405,transcript_HQ_SCJY_transcript423/f2p0/3846,transcript_HQ_YNMLP_transcript15701/f3p0/1859,transcript_HQ_SCEZ_transcript19286/f3p0/1285,transcript_HQ_YNLB_transcript5301/…
transcript11918/f5p0/2135,transcript_HQ_HBZL_transcript15060/f3p0/1668,transcript_HQ_YNLB_transcript575/f3p0/4351,transcript_HQ_SCJY_transcript3530/f2p0/2702,transcript_HQ_YNLB_transcript1363/f5p0/3731,transcript_HQ_YNLB_transcript2047/f2p0/3420,transcript_HQ_YNMLP_transcript1752/f2p0/3725,transcript_HQ_HBZL_transcript447/f2p0/4354,transcript_HQ_HBZL_transcript5803/f4p0/2456,transcript_HQ_HBZL_tr…
,transcript_HQ_YNMLP_transcript4305/f2p0/3047,transcript_HQ_YNLB_transcript21760/f6p0/745,transcript_HQ_HBZL_transcript1873/f2p0/3339,transcript_HQ_HBZL_transcript1668/f5p0/3383,transcript_HQ_HBZL_transcript8282/f4p0/2188,transcript_HQ_HBZL_transcript9/f2p0/7680,transcript_HQ_HBZL_transcript3816/f9p0/2804,transcript_HQ_YNLB_transcript10993/f8p0/2051,transcript_HQ_HBZL_transcript18203/f4p0/1555,tr…
GO:0009892	negative regulation of metabolic process	biological_process	0.1044	1	80	22033	128	39009	transcript_HQ_YNLB_transcript23567/f2p0/547,transcript_HQ_YNLB_transcript6961/f3p0/2490,transcript_HQ_YNMLP_transcript17903/f2p0/1497,transcript_HQ_YNLB_transcript2580/f2p0/3239,transcript_HQ_HBZL_transcript315/f2p0/4645,transcript_HQ_YNLB_transcript18947/f2p0/1046,transcript_HQ_YNLB_transcript48/f2p0/6942,transcript_HQ_YNMLP_transcript2142/f2p0/3584,transcript_HQ_HBZL_transcript13784/f2p0/1764,t…
GO:0006112	energy reserve metabolic process	biological_process	0.1048	1	4	22033	4	39009	transcript_HQ_YNLB_transcript14317/f8p0/1718,transcript_HQ_SCJY_transcript12229/f2p0/1713,transcript_HQ_HBZL_transcript10203/f2p0/2020,transcript_HQ_YNMLP_transcript3186/f2p0/3280
GO:0008773	[protein-PII] uridylyltransferase activity	molecular_function	0.10613	1	6	22033	7	39009	transcript_HQ_YNMLP_transcript19008/f3p0/1333,transcript_HQ_YNMLP_transcript20574/f2p0/1152,transcript_HQ_HBZL_transcript21058/f2p0/1151,transcript_HQ_YNLB_transcript18560/f27p0/1136,transcript_HQ_YNLB_transcript17751/f6p0/1228,transcript_HQ_HBZL_transcript20825/f4p0/1151
GO:0007016	cytoskeletal anchoring at plasma membrane	biological_process	0.10773	1	12	22033	16	39009	transcript_HQ_HBZL_transcript6509/f2p0/2379,transcript_HQ_YNLB_transcript9733/f2p0/2183,transcript_HQ_HBZL_transcript5265/f2p0/2544,transcript_HQ_HBZL_transcript7795/f9p0/2239,transcript_HQ_HBZL_transcript8195/f2p0/2201,transcript_HQ_YNLB_transcript4972/f3p0/2741,transcript_HQ_HBZL_transcript6462/f2p0/2266,transcript_HQ_HBZL_transcript8693/f9p0/2171,transcript_HQ_HBZL_transcript10679/f2p0/2023,tr…
GO:0042138	meiotic DNA double-strand break formation	biological_process	0.10787	1	4	22033	4	39009	transcript_HQ_YNLB_transcript837/f3p0/4104,transcript_HQ_HBZL_transcript10243/f2p0/2038,transcript_HQ_HBZL_transcript10668/f6p0/1987,transcript_HQ_HBZL_transcript14480/f8p0/1718
GO:0004523	RNA-DNA hybrid ribonuclease activity	molecular_function	0.10875	1	13	22033	17	39009	transcript_HQ_YNLB_transcript7693/f3p0/2399,transcript_HQ_YNMLP_transcript520/f3p0/4523,transcript_HQ_YNMLP_transcript10870/f2p0/2280,transcript_HQ_YNMLP_transcript129/f2p0/6058,transcript_HQ_YNLB_transcript8037/f2p0/2359,transcript_HQ_YNMLP_transcript8395/f2p0/2581,transcript_HQ_YNMLP_transcript1995/f2p0/3566,transcript_HQ_YNMLP_transcript10141/f6p0/2361,transcript_HQ_YNMLP_transcript4364/f3p0/3…
GO:0016052	carbohydrate catabolic process	biological_process	0.10902	1	156	22033	259	39009	transcript_HQ_HBZL_transcript17987/f17p0/1443,transcript_HQ_HBZL_transcript13345/f2p0/1803,transcript_HQ_YNMLP_transcript18284/f3p0/1416,transcript_HQ_YNMLP_transcript7845/f3p0/2580,transcript_HQ_HBZL_transcript4774/f3p0/2628,transcript_HQ_HBZL_transcript7031/f4p0/2319,transcript_HQ_SCJY_transcript13727/f6p0/1532,transcript_HQ_YNMLP_transcript17647/f2p0/1507,transcript_HQ_HBZL_transcript21770/f2p…
GO:0016855	racemase and epimerase activity, acting on amino acids and derivatives	molecular_function	0.10952	1	6	22033	7	39009	transcript_HQ_YNMLP_transcript21724/f2p0/1001,transcript_HQ_SCJY_transcript14225/f3p0/1452,transcript_HQ_HBZL_transcript17403/f3p0/1499,transcript_HQ_YNMLP_transcript17296/f2p0/1541,transcript_HQ_HBZL_transcript16075/f2p0/1610,transcript_HQ_HBZL_transcript21379/f2p0/1083
GO:0036361	racemase activity, acting on amino acids and derivatives	molecular_function	0.10952	1	6	22033	7	39009	transcript_HQ_HBZL_transcript16075/f2p0/1610,transcript_HQ_HBZL_transcript21379/f2p0/1083,transcript_HQ_YNMLP_transcript21724/f2p0/1001,transcript_HQ_YNMLP_transcript17296/f2p0/1541,transcript_HQ_HBZL_transcript17403/f3p0/1499,transcript_HQ_SCJY_transcript14225/f3p0/1452
GO:0009894	regulation of catabolic process	biological_process	0.10957	1	114	22033	185	39009	transcript_HQ_HBZL_transcript21/f2p0/7062,transcript_HQ_YNLB_transcript16022/f3p0/1517,transcript_HQ_HBZL_transcript15929/f3p0/1617,transcript_HQ_SCJY_transcript4722/f2p0/2536,transcript_HQ_YNMLP_transcript17961/f2p0/1479,transcript_HQ_YNMLP_transcript16032/f3p0/1680,transcript_HQ_YNMLP_transcript4091/f2p0/3076,transcript_HQ_HBZL_transcript3113/f7p0/2949,transcript_HQ_HBZL_transcript21667/f4p0/11…
GO:0019354	siroheme biosynthetic process	biological_process	0.11001	1	61	22033	96	39009	transcript_HQ_HBZL_transcript14054/f2p0/1744,transcript_HQ_YNMLP_transcript24/f5p0/7469,transcript_HQ_YNLB_transcript9910/f2p0/2172,transcript_HQ_SCJY_transcript8111/f3p0/2135,transcript_HQ_HBZL_transcript9337/f6p0/2076,transcript_HQ_YNMLP_transcript14479/f2p0/1887,transcript_HQ_HBZL_transcript6460/f2p0/2409,transcript_HQ_YNMLP_transcript3631/f6p0/3170,transcript_HQ_YNMLP_transcript12307/f7p0/215…
GO:0043115	precorrin-2 dehydrogenase activity	molecular_function	0.11001	1	61	22033	96	39009	transcript_HQ_HBZL_transcript19547/f3p0/1292,transcript_HQ_HBZL_transcript9683/f4p0/2046,transcript_HQ_HBZL_transcript21112/f3p0/1139,transcript_HQ_HBZL_transcript1124/f4p0/3690,transcript_HQ_HBZL_transcript17039/f23p0/1528,transcript_HQ_YNMLP_transcript20038/f2p0/1192,transcript_HQ_HBZL_transcript8311/f8p0/2193,transcript_HQ_SCEZ_transcript17947/f2p0/1430,transcript_HQ_HBZL_transcript3669/f2p0/2…
GO:0046156	siroheme metabolic process	biological_process	0.11001	1	61	22033	96	39009	transcript_HQ_HBZL_transcript19279/f5p0/1320,transcript_HQ_HBZL_transcript15/f2p0/7382,transcript_HQ_HBZL_transcript17123/f13p0/1489,transcript_HQ_YNMLP_transcript4865/f2p0/3019,transcript_HQ_HBZL_transcript20466/f2p0/1206,transcript_HQ_YNLB_transcript28/f2p0/7405,transcript_HQ_HBZL_transcript3999/f2p0/2729,transcript_HQ_YNLB_transcript7202/f2p0/2460,transcript_HQ_YNLB_transcript17486/f8p0/1284,t…
GO:0009890	negative regulation of biosynthetic process	biological_process	0.1103	1	26	22033	38	39009	transcript_HQ_HBZL_transcript3360/f5p0/2869,transcript_HQ_YNMLP_transcript1586/f9p0/3815,transcript_HQ_YNLB_transcript6961/f3p0/2490,transcript_HQ_YNLB_transcript2119/f2p0/3387,transcript_HQ_YNMLP_transcript13200/f2p0/2032,transcript_HQ_YNMLP_transcript551/f3p0/4510,transcript_HQ_HBZL_transcript15681/f3p0/1684,transcript_HQ_HBZL_transcript14890/f3p0/1688,transcript_HQ_YNLB_transcript3442/f7p0/301…
GO:0004197	cysteine-type endopeptidase activity	molecular_function	0.11061	1	56	22033	88	39009	transcript_HQ_YNLB_transcript20049/f4p0/934,transcript_HQ_HBZL_transcript18940/f3p0/1364,transcript_HQ_SCJY_transcript14309/f14p0/1359,transcript_HQ_YNLB_transcript4941/f2p0/2747,transcript_HQ_HBZL_transcript21786/f2p0/1070,transcript_HQ_HBZL_transcript17731/f2p0/1484,transcript_HQ_HBZL_transcript16738/f2p0/1555,transcript_HQ_SCEZ_transcript3894/f6p0/2708,transcript_HQ_HBZL_transcript860/f4p0/391…
GO:0034450	ubiquitin-ubiquitin ligase activity	molecular_function	0.11207	1	11	22033	14	39009	transcript_HQ_HBZL_transcript1111/f3p0/3701,transcript_HQ_YNMLP_transcript1737/f2p0/3739,transcript_HQ_HBZL_transcript1084/f2p0/3777,transcript_HQ_YNMLP_transcript1934/f2p0/3677,transcript_HQ_HBZL_transcript12884/f29p0/1784,transcript_HQ_SCJY_transcript11213/f2p0/1809,transcript_HQ_HBZL_transcript254/f3p0/4898,transcript_HQ_YNLB_transcript391/f2p0/4762,transcript_HQ_YNMLP_transcript486/f2p0/4607,…
GO:0031625	ubiquitin protein ligase binding	molecular_function	0.11272	1	31	22033	46	39009	transcript_HQ_HBZL_transcript4270/f2p0/2699,transcript_HQ_YNLB_transcript5983/f8p0/2648,transcript_HQ_YNMLP_transcript7171/f2p0/2694,transcript_HQ_YNLB_transcript3491/f2p0/3006,transcript_HQ_HBZL_transcript2430/f4p0/3118,transcript_HQ_YNMLP_transcript6948/f4p0/2697,transcript_HQ_YNMLP_transcript6584/f2p0/2728,transcript_HQ_HBZL_transcript5450/f3p0/2509,transcript_HQ_YNMLP_transcript475/f2p0/4678,…
GO:0044389	ubiquitin-like protein ligase binding	molecular_function	0.11272	1	31	22033	46	39009	transcript_HQ_HBZL_transcript4179/f2p0/2720,transcript_HQ_YNMLP_transcript5045/f2p0/3003,transcript_HQ_YNMLP_transcript4591/f16p0/2992,transcript_HQ_HBZL_transcript3703/f2p0/2798,transcript_HQ_YNMLP_transcript21173/f4p0/1076,transcript_HQ_YNMLP_transcript7221/f2p0/2672,transcript_HQ_SCJY_transcript3168/f4p0/2761,transcript_HQ_YNLB_transcript6331/f2p0/2559,transcript_HQ_HBZL_transcript3029/f2p0/29…
GO:0009893	positive regulation of metabolic process	biological_process	0.11304	1	119	22033	195	39009	transcript_HQ_YNMLP_transcript17961/f2p0/1479,transcript_HQ_YNMLP_transcript16032/f3p0/1680,transcript_HQ_YNLB_transcript20540/f8p0/890,transcript_HQ_HBZL_transcript12163/f3p0/1872,transcript_HQ_HBZL_transcript12569/f2p0/1867,transcript_HQ_YNMLP_transcript4091/f2p0/3076,transcript_HQ_HBZL_transcript22561/f5p0/970,transcript_HQ_HBZL_transcript21691/f2p0/1072,transcript_HQ_HBZL_transcript21667/f4p0…
GO:0003746	translation elongation factor activity	molecular_function	0.11339	1	42	22033	66	39009	transcript_HQ_HBZL_transcript1335/f3p0/3586,transcript_HQ_YNLB_transcript20555/f12p0/880,transcript_HQ_HBZL_transcript22719/f4p0/960,transcript_HQ_YNMLP_transcript21786/f5p0/1005,transcript_HQ_YNLB_transcript15468/f2p0/1597,transcript_HQ_SCEZ_transcript574/f4p0/4120,transcript_HQ_HBZL_transcript1740/f4p0/3309,transcript_HQ_YNLB_transcript14898/f4p0/1671,transcript_HQ_HBZL_transcript23177/f5p0/895…
GO:0042168	heme metabolic process	biological_process	0.11339	1	71	22033	113	39009	transcript_HQ_YNLB_transcript12983/f6p0/1819,transcript_HQ_YNMLP_transcript20203/f4p0/1227,transcript_HQ_SCJY_transcript11596/f2p0/1770,transcript_HQ_YNMLP_transcript14671/f7p0/1876,transcript_HQ_YNLB_transcript11061/f2p0/2045,transcript_HQ_HBZL_transcript4103/f2p0/2735,transcript_HQ_HBZL_transcript17816/f18p0/1419,transcript_HQ_YNMLP_transcript19755/f6p0/1232,transcript_HQ_YNMLP_transcript14054/…
GO:0009057	macromolecule catabolic process	biological_process	0.11441	1	324	22033	551	39009	transcript_HQ_YNMLP_transcript1934/f2p0/3677,transcript_HQ_HBZL_transcript18579/f3p0/1413,transcript_HQ_YNMLP_transcript14909/f2p0/1816,transcript_HQ_HBZL_transcript21623/f5p0/1096,transcript_HQ_SCEZ_transcript21581/f4p0/1034,transcript_HQ_HBZL_transcript22158/f6p0/1019,transcript_HQ_YNMLP_transcript7166/f9p0/2738,transcript_HQ_HBZL_transcript13434/f3p0/1797,transcript_HQ_SCJY_transcript14167/f2p…
GO:0030570	pectate lyase activity	molecular_function	0.11441	1	6	22033	7	39009	transcript_HQ_HBZL_transcript16163/f4p0/1599,transcript_HQ_HBZL_transcript16579/f3p0/1589,transcript_HQ_HBZL_transcript16914/f3p0/1543,transcript_HQ_HBZL_transcript18287/f3p0/1470,transcript_HQ_HBZL_transcript17532/f6p0/1470,transcript_HQ_HBZL_transcript11011/f5p0/1956
GO:0009523	photosystem II	cellular_component	0.11447	1	39	22033	61	39009	transcript_HQ_HBZL_transcript15660/f4p0/1630,transcript_HQ_HBZL_transcript12194/f4p0/1868,transcript_HQ_YNLB_transcript22477/f3p0/670,transcript_HQ_HBZL_transcript26234/f3p0/590,transcript_HQ_YNMLP_transcript24210/f3p0/770,transcript_HQ_YNMLP_transcript2544/f3p0/3426,transcript_HQ_HBZL_transcript21841/f5p0/1072,transcript_HQ_YNLB_transcript22240/f3p0/690,transcript_HQ_SCJY_transcript10455/f2p0/18…
GO:0017016	Ras GTPase binding	molecular_function	0.11594	1	62	22033	95	39009	transcript_HQ_YNMLP_transcript2922/f5p0/3324,transcript_HQ_YNMLP_transcript2122/f3p0/3567,transcript_HQ_YNMLP_transcript691/f2p0/4369,transcript_HQ_YNLB_transcript18333/f4p0/1259,transcript_HQ_YNLB_transcript1638/f2p0/3613,transcript_HQ_YNLB_transcript917/f2p0/3997,transcript_HQ_YNMLP_transcript2163/f2p0/3570,transcript_HQ_HBZL_transcript645/f2p0/3996,transcript_HQ_SCEZ_transcript35/f2p0/6881,tra…
GO:0031267	small GTPase binding	molecular_function	0.11594	1	62	22033	95	39009	transcript_HQ_YNMLP_transcript3200/f2p0/3278,transcript_HQ_YNMLP_transcript1017/f3p0/4068,transcript_HQ_YNLB_transcript1568/f2p0/3638,transcript_HQ_YNMLP_transcript4084/f7p0/3083,transcript_HQ_HBZL_transcript1326/f3p0/3571,transcript_HQ_HBZL_transcript22/f5p0/7100,transcript_HQ_HBZL_transcript2121/f20p0/3160,transcript_HQ_YNLB_transcript994/f4p0/3981,transcript_HQ_HBZL_transcript1369/f2p0/3529,tr…
GO:0051020	GTPase binding	molecular_function	0.11594	1	62	22033	95	39009	transcript_HQ_YNLB_transcript983/f13p0/3959,transcript_HQ_YNLB_transcript6762/f4p0/2514,transcript_HQ_HBZL_transcript696/f2p0/4042,transcript_HQ_HBZL_transcript11628/f4p0/1863,transcript_HQ_SCEZ_transcript8750/f4p0/2113,transcript_HQ_YNMLP_transcript3853/f16p0/3118,transcript_HQ_YNMLP_transcript2838/f2p0/3416,transcript_HQ_YNMLP_transcript19752/f2p0/1239,transcript_HQ_YNMLP_transcript2604/f3p0/34…
GO:0006732	coenzyme metabolic process	biological_process	0.11609	1	284	22033	478	39009	transcript_HQ_YNMLP_transcript653/f2p0/4389,transcript_HQ_YNMLP_transcript15330/f2p0/1795,transcript_HQ_HBZL_transcript18977/f6p0/1383,transcript_HQ_YNMLP_transcript3227/f2p0/3267,transcript_HQ_YNMLP_transcript9777/f2p0/2397,transcript_HQ_YNLB_transcript15737/f2p0/1545,transcript_HQ_YNLB_transcript11870/f7p0/1943,transcript_HQ_YNMLP_transcript7995/f2p0/2591,transcript_HQ_HBZL_transcript7113/f3p0/…
GO:0004806	triglyceride lipase activity	molecular_function	0.1162	1	16	22033	22	39009	transcript_HQ_YNMLP_transcript881/f2p0/4212,transcript_HQ_YNLB_transcript1810/f2p0/3515,transcript_HQ_YNMLP_transcript1555/f2p0/3783,transcript_HQ_HBZL_transcript18430/f2p0/1419,transcript_HQ_HBZL_transcript2013/f4p0/3263,transcript_HQ_HBZL_transcript17685/f2p0/1487,transcript_HQ_YNMLP_transcript1955/f2p0/3622,transcript_HQ_YNLB_transcript1172/f5p0/3839,transcript_HQ_YNLB_transcript1865/f2p0/3490…
GO:0019068	virion assembly	biological_process	0.11642	1	39	22033	60	39009	transcript_HQ_YNLB_transcript16740/f2p0/1412,transcript_HQ_HBZL_transcript22400/f2p0/1006,transcript_HQ_HBZL_transcript11433/f4p0/1940,transcript_HQ_YNLB_transcript18847/f6p0/1102,transcript_HQ_SCJY_transcript10036/f3p0/1938,transcript_HQ_YNLB_transcript10110/f6p0/2148,transcript_HQ_HBZL_transcript13872/f2p0/1749,transcript_HQ_YNMLP_transcript19800/f2p0/1236,transcript_HQ_HBZL_transcript3741/f2p0…
GO:0032269	negative regulation of cellular protein metabolic process	biological_process	0.11773	1	27	22033	40	39009	transcript_HQ_YNLB_transcript18947/f2p0/1046,transcript_HQ_YNMLP_transcript1108/f2p0/4014,transcript_HQ_YNMLP_transcript551/f3p0/4510,transcript_HQ_YNMLP_transcript526/f2p0/4518,transcript_HQ_HBZL_transcript25716/f17p0/638,transcript_HQ_YNLB_transcript48/f2p0/6942,transcript_HQ_HBZL_transcript315/f2p0/4645,transcript_HQ_HBZL_transcript30/f3p0/6883,transcript_HQ_SCEZ_transcript19783/f4p0/1209,tran…
GO:0051248	negative regulation of protein metabolic process	biological_process	0.11773	1	27	22033	40	39009	transcript_HQ_YNMLP_transcript7075/f2p0/2680,transcript_HQ_HBZL_transcript3113/f7p0/2949,transcript_HQ_YNMLP_transcript2142/f2p0/3584,transcript_HQ_YNLB_transcript16022/f3p0/1517,transcript_HQ_HBZL_transcript21/f2p0/7062,transcript_HQ_SCJY_transcript19801/f2p0/788,transcript_HQ_SCJY_transcript10115/f5p0/1922,transcript_HQ_YNLB_transcript17860/f2p0/1225,transcript_HQ_HBZL_transcript7062/f2p0/2323,…
GO:0051188	cofactor biosynthetic process	biological_process	0.11779	1	233	22033	389	39009	transcript_HQ_HBZL_transcript17384/f2p0/996,transcript_HQ_HBZL_transcript11778/f2p0/1886,transcript_HQ_YNMLP_transcript12362/f7p0/2121,transcript_HQ_YNLB_transcript13752/f6p0/1769,transcript_HQ_HBZL_transcript18584/f3p0/1402,transcript_HQ_HBZL_transcript13138/f14p0/1803,transcript_HQ_YNMLP_transcript4380/f2p0/3030,transcript_HQ_YNMLP_transcript16173/f2p0/1684,transcript_HQ_HBZL_transcript18474/f6…
GO:0042651	thylakoid membrane	cellular_component	0.11791	1	22	22033	33	39009	transcript_HQ_HBZL_transcript22914/f3p0/931,transcript_HQ_HBZL_transcript20033/f3p0/1241,transcript_HQ_SCJY_transcript17554/f10p0/984,transcript_HQ_YNMLP_transcript20562/f2p0/1150,transcript_HQ_HBZL_transcript20789/f17p0/1175,transcript_HQ_HBZL_transcript25448/f31p0/656,transcript_HQ_YNLB_transcript8404/f2p0/2326,transcript_HQ_HBZL_transcript793/f2p0/3927,transcript_HQ_SCJY_transcript16405/f9p0/1…
GO:0005788	endoplasmic reticulum lumen	cellular_component	0.118	1	17	22033	24	39009	transcript_HQ_YNMLP_transcript3775/f2p0/3126,transcript_HQ_HBZL_transcript11489/f2p0/1941,transcript_HQ_YNLB_transcript5000/f13p0/2738,transcript_HQ_HBZL_transcript11113/f22p0/1903,transcript_HQ_SCJY_transcript10397/f3p0/1914,transcript_HQ_YNMLP_transcript6191/f2p0/2764,transcript_HQ_YNLB_transcript2112/f2p0/3394,transcript_HQ_YNMLP_transcript4349/f5p0/3040,transcript_HQ_HBZL_transcript11234/f14p…
GO:0043549	regulation of kinase activity	biological_process	0.11843	1	6	22033	7	39009	transcript_HQ_HBZL_transcript21239/f2p0/1108,transcript_HQ_HBZL_transcript21002/f2p0/1143,transcript_HQ_HBZL_transcript3649/f2p0/2802,transcript_HQ_HBZL_transcript3400/f2p0/2888,transcript_HQ_HBZL_transcript22396/f2p0/1018,transcript_HQ_HBZL_transcript315/f2p0/4645
GO:0045859	regulation of protein kinase activity	biological_process	0.11843	1	6	22033	7	39009	transcript_HQ_HBZL_transcript21002/f2p0/1143,transcript_HQ_HBZL_transcript22396/f2p0/1018,transcript_HQ_HBZL_transcript315/f2p0/4645,transcript_HQ_HBZL_transcript3400/f2p0/2888,transcript_HQ_HBZL_transcript3649/f2p0/2802,transcript_HQ_HBZL_transcript21239/f2p0/1108
GO:0005319	lipid transporter activity	molecular_function	0.11972	1	20	22033	29	39009	transcript_HQ_SCEZ_transcript2464/f3p0/3083,transcript_HQ_YNMLP_transcript22702/f2p0/899,transcript_HQ_SCJY_transcript11695/f2p0/1783,transcript_HQ_HBZL_transcript21457/f6p0/1107,transcript_HQ_HBZL_transcript7714/f7p0/2296,transcript_HQ_SCEZ_transcript4999/f2p0/2571,transcript_HQ_YNMLP_transcript12279/f2p0/2140,transcript_HQ_YNLB_transcript18585/f2p0/1137,transcript_HQ_HBZL_transcript4/f2p0/8234,…
GO:0051536	iron-sulfur cluster binding	molecular_function	0.11975	1	127	22033	210	39009	transcript_HQ_YNLB_transcript18411/f2p0/1149,transcript_HQ_SCJY_transcript3905/f2p0/2663,transcript_HQ_HBZL_transcript16545/f10p0/1569,transcript_HQ_YNMLP_transcript16860/f2p0/1578,transcript_HQ_SCJY_transcript3037/f2p0/2807,transcript_HQ_HBZL_transcript547/f2p0/4179,transcript_HQ_HBZL_transcript8610/f2p0/2257,transcript_HQ_HBZL_transcript13076/f3p0/1815,transcript_HQ_YNMLP_transcript21541/f2p0/1…
GO:0051540	metal cluster binding	molecular_function	0.11975	1	127	22033	210	39009	transcript_HQ_YNLB_transcript15685/f3p0/1547,transcript_HQ_YNLB_transcript21981/f4p0/708,transcript_HQ_YNLB_transcript20960/f2p0/835,transcript_HQ_HBZL_transcript10295/f2p0/2020,transcript_HQ_HBZL_transcript16887/f23p0/1522,transcript_HQ_SCJY_transcript22512/f4p0/524,transcript_HQ_HBZL_transcript16037/f4p0/1571,transcript_HQ_HBZL_transcript20288/f11p0/1222,transcript_HQ_YNLB_transcript22766/f4p0/…
GO:0005524	ATP binding	molecular_function	0.12021	1	3148	22033	5431	39009	transcript_HQ_YNMLP_transcript1403/f2p0/3848,transcript_HQ_YNMLP_transcript1215/f5p0/3930,transcript_HQ_YNMLP_transcript4688/f3p0/2998,transcript_HQ_SCJY_transcript4097/f2p0/2610,transcript_HQ_HBZL_transcript3675/f4p0/2803,transcript_HQ_YNMLP_transcript7166/f9p0/2738,transcript_HQ_YNLB_transcript1851/f2p0/3502,transcript_HQ_YNMLP_transcript4244/f2p0/3061,transcript_HQ_HBZL_transcript10363/f6p0/20…
0,transcript_HQ_HBZL_transcript1029/f2p0/3796,transcript_HQ_HBZL_transcript5595/f2p0/2518,transcript_HQ_HBZL_transcript2785/f6p0/2950,transcript_HQ_SCJY_transcript7367/f3p0/2236,transcript_HQ_HBZL_transcript6383/f4p0/2415,transcript_HQ_YNLB_transcript22911/f2p0/636,transcript_HQ_YNLB_transcript17577/f2p0/1291,transcript_HQ_SCJY_transcript13528/f3p0/1588,transcript_HQ_YNLB_transcript19144/f3p0/105…
1715/f10p0/1887,transcript_HQ_YNMLP_transcript12011/f4p0/2155,transcript_HQ_HBZL_transcript8090/f2p0/2218,transcript_HQ_SCJY_transcript12097/f7p0/1723,transcript_HQ_YNMLP_transcript6238/f2p0/2759,transcript_HQ_YNLB_transcript3197/f9p0/3083,transcript_HQ_SCJY_transcript7286/f2p0/2255,transcript_HQ_YNMLP_transcript2251/f3p0/3531,transcript_HQ_HBZL_transcript5028/f10p0/2539,transcript_HQ_YNMLP_trans…
_HQ_SCJY_transcript2965/f2p0/2787,transcript_HQ_YNLB_transcript15056/f2p0/1639,transcript_HQ_YNMLP_transcript16412/f3p0/1650,transcript_HQ_HBZL_transcript9102/f5p0/2101,transcript_HQ_SCJY_transcript14940/f2p0/1347,transcript_HQ_SCJY_transcript6421/f3p0/2357,transcript_HQ_YNMLP_transcript6343/f3p0/2751,transcript_HQ_SCJY_transcript16854/f2p0/1149,transcript_HQ_YNLB_transcript5194/f8p0/2726,transcr…
cript_HQ_SCJY_transcript12098/f3p0/1733,transcript_HQ_YNMLP_transcript3283/f2p0/3274,transcript_HQ_YNMLP_transcript11781/f2p0/2178,transcript_HQ_HBZL_transcript1990/f2p0/3260,transcript_HQ_YNMLP_transcript22835/f3p0/921,transcript_HQ_HBZL_transcript6202/f4p0/2425,transcript_HQ_HBZL_transcript5622/f2p0/2507,transcript_HQ_HBZL_transcript3032/f2p0/2934,transcript_HQ_SCEZ_transcript17854/f3p0/1406,tr…
GO:0001934	positive regulation of protein phosphorylation	biological_process	0.1203	1	6	22033	7	39009	transcript_HQ_YNLB_transcript19306/f2p0/1047,transcript_HQ_YNMLP_transcript3606/f2p0/3300,transcript_HQ_HBZL_transcript21423/f8p0/1101,transcript_HQ_HBZL_transcript1925/f2p0/3331,transcript_HQ_HBZL_transcript3400/f2p0/2888,transcript_HQ_HBZL_transcript3649/f2p0/2802
GO:0042327	positive regulation of phosphorylation	biological_process	0.1203	1	6	22033	7	39009	transcript_HQ_HBZL_transcript3400/f2p0/2888,transcript_HQ_HBZL_transcript3649/f2p0/2802,transcript_HQ_YNLB_transcript19306/f2p0/1047,transcript_HQ_YNMLP_transcript3606/f2p0/3300,transcript_HQ_HBZL_transcript21423/f8p0/1101,transcript_HQ_HBZL_transcript1925/f2p0/3331
GO:0043021	ribonucleoprotein complex binding	molecular_function	0.12067	1	33	22033	51	39009	transcript_HQ_SCJY_transcript16494/f2p0/1146,transcript_HQ_YNMLP_transcript18427/f3p0/1385,transcript_HQ_YNMLP_transcript21786/f5p0/1005,transcript_HQ_YNLB_transcript20555/f12p0/880,transcript_HQ_HBZL_transcript22200/f3p0/1022,transcript_HQ_YNMLP_transcript27424/f2p0/436,transcript_HQ_HBZL_transcript23177/f5p0/895,transcript_HQ_SCJY_transcript12727/f2p0/1640,transcript_HQ_HBZL_transcript18760/f2p…
GO:0044036	cell wall macromolecule metabolic process	biological_process	0.12072	1	34	22033	53	39009	transcript_HQ_HBZL_transcript21135/f15p0/1165,transcript_HQ_HBZL_transcript19523/f3p0/1299,transcript_HQ_SCEZ_transcript16124/f4p0/1577,transcript_HQ_YNLB_transcript16926/f19p0/1360,transcript_HQ_YNLB_transcript21761/f4p0/763,transcript_HQ_HBZL_transcript20918/f10p0/1164,transcript_HQ_HBZL_transcript21771/f45p0/1001,transcript_HQ_HBZL_transcript20802/f6p0/1168,transcript_HQ_SCEZ_transcript23077/f…
GO:0016437	tRNA cytidylyltransferase activity	molecular_function	0.12089	1	8	22033	10	39009	transcript_HQ_HBZL_transcript7875/f2p0/2228,transcript_HQ_YNMLP_transcript4570/f2p0/3016,transcript_HQ_YNMLP_transcript3156/f2p0/3289,transcript_HQ_SCJY_transcript9081/f2p0/2031,transcript_HQ_HBZL_transcript12571/f2p0/1847,transcript_HQ_HBZL_transcript11633/f2p0/1898,transcript_HQ_SCJY_transcript10594/f2p0/1882,transcript_HQ_YNMLP_transcript13582/f2p0/2008
GO:0070567	cytidylyltransferase activity	molecular_function	0.12089	1	8	22033	10	39009	transcript_HQ_HBZL_transcript7875/f2p0/2228,transcript_HQ_YNMLP_transcript4570/f2p0/3016,transcript_HQ_YNMLP_transcript3156/f2p0/3289,transcript_HQ_HBZL_transcript12571/f2p0/1847,transcript_HQ_SCJY_transcript9081/f2p0/2031,transcript_HQ_SCJY_transcript10594/f2p0/1882,transcript_HQ_HBZL_transcript11633/f2p0/1898,transcript_HQ_YNMLP_transcript13582/f2p0/2008
GO:0042623	ATPase activity, coupled	molecular_function	0.12316	1	163	22033	263	39009	transcript_HQ_YNMLP_transcript855/f9p0/4177,transcript_HQ_YNLB_transcript431/f2p0/4645,transcript_HQ_YNLB_transcript7845/f2p0/2388,transcript_HQ_HBZL_transcript265/f3p0/4840,transcript_HQ_YNMLP_transcript280/f4p0/5260,transcript_HQ_YNLB_transcript5581/f2p0/2651,transcript_HQ_YNMLP_transcript951/f7p0/4101,transcript_HQ_YNLB_transcript2081/f3p0/3445,transcript_HQ_HBZL_transcript218/f2p0/5052,transc…
GO:0007127	meiosis I	biological_process	0.12359	1	13	22033	18	39009	transcript_HQ_YNMLP_transcript19385/f16p0/1250,transcript_HQ_HBZL_transcript24035/f3p0/823,transcript_HQ_HBZL_transcript10668/f6p0/1987,transcript_HQ_SCEZ_transcript10832/f6p0/1940,transcript_HQ_YNMLP_transcript18255/f3p0/1406,transcript_HQ_HBZL_transcript20304/f13p0/1230,transcript_HQ_SCJY_transcript15880/f2p0/1230,transcript_HQ_HBZL_transcript11665/f4p0/1910,transcript_HQ_YNLB_transcript16043/f…
GO:0009976	tocopherol cyclase activity	molecular_function	0.12408	1	6	22033	7	39009	transcript_HQ_YNLB_transcript14153/f3p0/1675,transcript_HQ_YNMLP_transcript2228/f2p0/3561,transcript_HQ_HBZL_transcript13446/f2p0/1792,transcript_HQ_YNMLP_transcript2168/f2p0/3623,transcript_HQ_HBZL_transcript15514/f2p0/1671,transcript_HQ_YNMLP_transcript15703/f2p0/1711
GO:0016586	RSC complex	cellular_component	0.12456	1	8	22033	10	39009	transcript_HQ_HBZL_transcript4342/f2p0/2706,transcript_HQ_YNLB_transcript7454/f2p0/2431,transcript_HQ_YNMLP_transcript7670/f3p0/2608,transcript_HQ_YNMLP_transcript7563/f3p0/2624,transcript_HQ_YNLB_transcript5484/f4p0/2694,transcript_HQ_HBZL_transcript4520/f5p0/2576,transcript_HQ_YNMLP_transcript7242/f2p0/2681,transcript_HQ_HBZL_transcript5924/f3p0/2441
GO:0006779	porphyrin-containing compound biosynthetic process	biological_process	0.12524	1	82	22033	132	39009	transcript_HQ_HBZL_transcript8311/f8p0/2193,transcript_HQ_HBZL_transcript9683/f4p0/2046,transcript_HQ_HBZL_transcript17039/f23p0/1528,transcript_HQ_HBZL_transcript21112/f3p0/1139,transcript_HQ_HBZL_transcript16753/f2p0/1549,transcript_HQ_YNMLP_transcript1194/f2p0/3932,transcript_HQ_HBZL_transcript10887/f2p0/1971,transcript_HQ_SCJY_transcript11082/f2p0/1837,transcript_HQ_HBZL_transcript17151/f5p0/…
GO:1990204	oxidoreductase complex	cellular_component	0.12559	1	34	22033	54	39009	transcript_HQ_HBZL_transcript793/f2p0/3927,transcript_HQ_YNMLP_transcript26326/f4p0/552,transcript_HQ_YNLB_transcript9990/f2p0/2156,transcript_HQ_YNLB_transcript21878/f4p0/739,transcript_HQ_HBZL_transcript20789/f17p0/1175,transcript_HQ_YNMLP_transcript20562/f2p0/1150,transcript_HQ_HBZL_transcript25448/f31p0/656,transcript_HQ_YNLB_transcript22721/f9p0/638,transcript_HQ_HBZL_transcript14554/f2p0/17…
GO:0003924	GTPase activity	molecular_function	0.12622	1	558	22033	947	39009	transcript_HQ_HBZL_transcript6710/f5p0/2351,transcript_HQ_YNLB_transcript684/f3p0/4251,transcript_HQ_YNMLP_transcript18749/f2p0/1352,transcript_HQ_YNLB_transcript340/f4p0/4878,transcript_HQ_YNLB_transcript15206/f2p0/1634,transcript_HQ_YNMLP_transcript28/f2p0/7441,transcript_HQ_HBZL_transcript470/f3p0/4298,transcript_HQ_HBZL_transcript22811/f2p0/956,transcript_HQ_HBZL_transcript2126/f3p0/3213,tran…
GO:0008443	phosphofructokinase activity	molecular_function	0.12693	1	64	22033	103	39009	transcript_HQ_HBZL_transcript8810/f6p0/2158,transcript_HQ_YNMLP_transcript3122/f2p0/3279,transcript_HQ_YNMLP_transcript15330/f2p0/1795,transcript_HQ_HBZL_transcript9441/f2p0/2089,transcript_HQ_SCJY_transcript9860/f2p0/2096,transcript_HQ_HBZL_transcript20281/f4p0/1212,transcript_HQ_YNLB_transcript14038/f3p0/1781,transcript_HQ_YNMLP_transcript16626/f3p0/1609,transcript_HQ_YNMLP_transcript16106/f2p0…
GO:0019200	carbohydrate kinase activity	molecular_function	0.12693	1	64	22033	103	39009	transcript_HQ_YNLB_transcript10095/f2p0/2235,transcript_HQ_YNMLP_transcript11521/f5p0/2214,transcript_HQ_YNMLP_transcript7845/f3p0/2580,transcript_HQ_YNMLP_transcript22102/f2p0/967,transcript_HQ_HBZL_transcript7031/f4p0/2319,transcript_HQ_SCEZ_transcript3930/f2p0/2697,transcript_HQ_SCJY_transcript2120/f2p0/2971,transcript_HQ_HBZL_transcript23248/f5p0/915,transcript_HQ_YNMLP_transcript4420/f2p0/30…
GO:0001883	purine nucleoside binding	molecular_function	0.12753	1	3422	22033	5913	39009	transcript_HQ_HBZL_transcript18901/f6p0/1376,transcript_HQ_YNMLP_transcript13682/f2p0/1920,transcript_HQ_YNMLP_transcript8998/f2p0/2374,transcript_HQ_SCJY_transcript6877/f3p0/2338,transcript_HQ_YNMLP_transcript16144/f2p0/1803,transcript_HQ_HBZL_transcript1785/f2p0/3365,transcript_HQ_SCJY_transcript6234/f2p0/2349,transcript_HQ_YNMLP_transcript23940/f2p0/781,transcript_HQ_HBZL_transcript21868/f2p0/…
35/f2p0/1333,transcript_HQ_YNLB_transcript4892/f2p0/2745,transcript_HQ_YNLB_transcript10574/f2p0/2100,transcript_HQ_HBZL_transcript1770/f2p0/3332,transcript_HQ_HBZL_transcript3759/f3p0/2742,transcript_HQ_YNLB_transcript2059/f15p0/3435,transcript_HQ_HBZL_transcript11387/f5p0/1930,transcript_HQ_HBZL_transcript11106/f3p0/1980,transcript_HQ_HBZL_transcript4469/f3p0/2665,transcript_HQ_HBZL_transcript3…
cript_HQ_HBZL_transcript1206/f2p0/3635,transcript_HQ_YNMLP_transcript11368/f2p0/2235,transcript_HQ_YNMLP_transcript13384/f3p0/1996,transcript_HQ_YNLB_transcript13923/f2p0/1760,transcript_HQ_YNLB_transcript9775/f2p0/2216,transcript_HQ_HBZL_transcript23208/f3p0/913,transcript_HQ_YNLB_transcript371/f6p0/4783,transcript_HQ_YNMLP_transcript6021/f6p0/2797,transcript_HQ_YNMLP_transcript422/f4p0/4702,tra…
1949,transcript_HQ_YNMLP_transcript6787/f4p0/2719,transcript_HQ_YNLB_transcript17902/f2p0/1228,transcript_HQ_HBZL_transcript10570/f13p0/1978,transcript_HQ_HBZL_transcript17391/f2p0/1501,transcript_HQ_HBZL_transcript8248/f2p0/2196,transcript_HQ_YNMLP_transcript7900/f3p0/2581,transcript_HQ_YNLB_transcript531/f3p0/4433,transcript_HQ_SCJY_transcript7029/f2p0/2257,transcript_HQ_YNMLP_transcript4051/f2…
pt_HQ_HBZL_transcript11505/f4p0/1933,transcript_HQ_YNLB_transcript21728/f6p0/750,transcript_HQ_YNLB_transcript2223/f2p0/3364,transcript_HQ_YNMLP_transcript16757/f2p0/1601,transcript_HQ_SCEZ_transcript6395/f2p0/2332,transcript_HQ_YNMLP_transcript3169/f3p0/3269,transcript_HQ_HBZL_transcript2282/f2p0/3167,transcript_HQ_HBZL_transcript13206/f3p0/1771,transcript_HQ_YNMLP_transcript299/f3p0/5208,transc…
GO:0032549	ribonucleoside binding	molecular_function	0.12753	1	3422	22033	5913	39009	transcript_HQ_YNMLP_transcript5163/f2p0/2912,transcript_HQ_HBZL_transcript6710/f5p0/2351,transcript_HQ_YNMLP_transcript28/f2p0/7441,transcript_HQ_HBZL_transcript470/f3p0/4298,transcript_HQ_HBZL_transcript4141/f2p0/2708,transcript_HQ_HBZL_transcript4899/f2p0/2607,transcript_HQ_HBZL_transcript22135/f2p0/1027,transcript_HQ_HBZL_transcript5173/f6p0/2540,transcript_HQ_YNMLP_transcript10000/f10p0/2362,…
14558/f5p0/1685,transcript_HQ_YNLB_transcript926/f2p0/4005,transcript_HQ_YNLB_transcript3283/f3p0/3063,transcript_HQ_HBZL_transcript5129/f3p0/2561,transcript_HQ_HBZL_transcript1424/f2p0/3515,transcript_HQ_HBZL_transcript2095/f2p0/3230,transcript_HQ_HBZL_transcript3564/f7p0/2788,transcript_HQ_YNLB_transcript16892/f2p0/1370,transcript_HQ_HBZL_transcript10129/f6p0/2074,transcript_HQ_HBZL_transcript1…
p0/4423,transcript_HQ_YNLB_transcript1237/f2p0/3880,transcript_HQ_YNMLP_transcript397/f2p0/4852,transcript_HQ_HBZL_transcript378/f2p0/4503,transcript_HQ_YNLB_transcript1764/f2p0/3537,transcript_HQ_HBZL_transcript8115/f2p0/2251,transcript_HQ_HBZL_transcript3797/f2p0/2776,transcript_HQ_HBZL_transcript650/f4p0/4058,transcript_HQ_YNMLP_transcript8685/f4p0/2534,transcript_HQ_SCEZ_transcript469/f2p0/42…
ipt17706/f6p0/1527,transcript_HQ_HBZL_transcript1887/f4p0/3308,transcript_HQ_SCJY_transcript3530/f2p0/2702,transcript_HQ_YNLB_transcript575/f3p0/4351,transcript_HQ_HBZL_transcript15060/f3p0/1668,transcript_HQ_SCJY_transcript13015/f3p0/1634,transcript_HQ_YNLB_transcript4892/f2p0/2745,transcript_HQ_HBZL_transcript19635/f2p0/1333,transcript_HQ_YNLB_transcript268/f3p0/5075,transcript_HQ_SCJY_transcri…
ranscript_HQ_YNLB_transcript1378/f2p0/3710,transcript_HQ_HBZL_transcript5828/f2p0/2474,transcript_HQ_HBZL_transcript4945/f5p0/2607,transcript_HQ_YNMLP_transcript10300/f3p0/2333,transcript_HQ_SCEZ_transcript18859/f2p0/1313,transcript_HQ_HBZL_transcript16/f2p0/7482,transcript_HQ_HBZL_transcript13732/f5p0/1785,transcript_HQ_HBZL_transcript8499/f2p0/2178,transcript_HQ_HBZL_transcript8282/f4p0/2188,tr…
GO:0032550	purine ribonucleoside binding	molecular_function	0.12753	1	3422	22033	5913	39009	transcript_HQ_HBZL_transcript13100/f3p0/1814,transcript_HQ_HBZL_transcript4589/f3p0/2660,transcript_HQ_YNLB_transcript4091/f2p0/2897,transcript_HQ_YNLB_transcript444/f2p0/4643,transcript_HQ_HBZL_transcript12048/f4p0/1878,transcript_HQ_YNMLP_transcript5177/f2p0/2941,transcript_HQ_YNLB_transcript7579/f2p0/2414,transcript_HQ_HBZL_transcript43/f2p0/6582,transcript_HQ_YNLB_transcript12429/f3p0/1914,tr…
ript11453/f2p0/1915,transcript_HQ_YNMLP_transcript7423/f3p0/2712,transcript_HQ_YNLB_transcript15551/f9p0/1603,transcript_HQ_HBZL_transcript15198/f3p0/1664,transcript_HQ_HBZL_transcript14760/f15p0/1773,transcript_HQ_SCEZ_transcript21068/f3p0/1085,transcript_HQ_YNLB_transcript2575/f3p0/3236,transcript_HQ_YNMLP_transcript14093/f3p0/1930,transcript_HQ_HBZL_transcript12742/f3p0/1842,transcript_HQ_HBZL…
687,transcript_HQ_YNLB_transcript6615/f2p0/2537,transcript_HQ_YNLB_transcript9775/f2p0/2216,transcript_HQ_YNMLP_transcript13384/f3p0/1996,transcript_HQ_YNLB_transcript13923/f2p0/1760,transcript_HQ_YNLB_transcript371/f6p0/4783,transcript_HQ_HBZL_transcript23208/f3p0/913,transcript_HQ_YNMLP_transcript6021/f6p0/2797,transcript_HQ_YNMLP_transcript422/f4p0/4702,transcript_HQ_HBZL_transcript7920/f2p0/2…
/2927,transcript_HQ_YNMLP_transcript8756/f2p0/2506,transcript_HQ_YNLB_transcript7845/f2p0/2388,transcript_HQ_SCJY_transcript8788/f2p0/2099,transcript_HQ_YNLB_transcript6144/f2p0/2571,transcript_HQ_SCJY_transcript4447/f2p0/2585,transcript_HQ_YNMLP_transcript4996/f4p0/2917,transcript_HQ_HBZL_transcript10439/f2p0/2004,transcript_HQ_HBZL_transcript16027/f6p0/1611,transcript_HQ_SCJY_transcript17608/f6…
LP_transcript19440/f4p0/1275,transcript_HQ_SCJY_transcript10422/f4p0/1901,transcript_HQ_HBZL_transcript10512/f4p0/2000,transcript_HQ_HBZL_transcript16189/f13p0/1532,transcript_HQ_YNMLP_transcript18655/f3p0/1393,transcript_HQ_SCJY_transcript3196/f3p0/2763,transcript_HQ_YNMLP_transcript7801/f2p0/2677,transcript_HQ_YNMLP_transcript1809/f3p0/3763,transcript_HQ_HBZL_transcript12693/f2p0/1836,transcrip…
GO:0032555	purine ribonucleotide binding	molecular_function	0.12753	1	3422	22033	5913	39009	transcript_HQ_YNLB_transcript431/f2p0/4645,transcript_HQ_HBZL_transcript7598/f2p0/2283,transcript_HQ_HBZL_transcript4969/f2p0/2564,transcript_HQ_HBZL_transcript8686/f2p0/2174,transcript_HQ_HBZL_transcript2341/f2p0/3142,transcript_HQ_SCJY_transcript8917/f2p0/2031,transcript_HQ_YNLB_transcript9760/f2p0/2216,transcript_HQ_YNLB_transcript14492/f3p0/1688,transcript_HQ_YNLB_transcript3983/f2p0/2888,tra…
cript17468/f4p0/1526,transcript_HQ_HBZL_transcript59/f3p0/6391,transcript_HQ_HBZL_transcript7297/f2p0/2331,transcript_HQ_HBZL_transcript23746/f2p0/842,transcript_HQ_HBZL_transcript962/f3p0/3785,transcript_HQ_HBZL_transcript5580/f3p0/2504,transcript_HQ_YNLB_transcript9593/f2p0/2196,transcript_HQ_YNMLP_transcript3900/f2p0/3188,transcript_HQ_YNMLP_transcript1514/f4p0/3813,transcript_HQ_SCJY_transcri…
ipt_HQ_YNMLP_transcript5809/f2p0/2838,transcript_HQ_YNLB_transcript16084/f3p0/1502,transcript_HQ_YNMLP_transcript9777/f2p0/2397,transcript_HQ_YNMLP_transcript9142/f2p0/2462,transcript_HQ_HBZL_transcript3258/f2p0/2888,transcript_HQ_YNMLP_transcript2537/f2p0/3445,transcript_HQ_SCEZ_transcript65/f4p0/6188,transcript_HQ_SCJY_transcript5046/f2p0/2500,transcript_HQ_HBZL_transcript12986/f3p0/1829,transc…
p0/2686,transcript_HQ_HBZL_transcript6598/f2p0/2380,transcript_HQ_YNLB_transcript6431/f8p0/2478,transcript_HQ_YNLB_transcript18095/f2p0/1222,transcript_HQ_HBZL_transcript25504/f3p0/676,transcript_HQ_HBZL_transcript21829/f4p0/1134,transcript_HQ_YNMLP_transcript7700/f2p0/2624,transcript_HQ_HBZL_transcript5154/f4p0/2582,transcript_HQ_YNLB_transcript218/f2p0/5390,transcript_HQ_YNMLP_transcript21817/f…
t_HQ_HBZL_transcript1599/f2p0/3430,transcript_HQ_YNLB_transcript8504/f2p0/2378,transcript_HQ_HBZL_transcript897/f5p0/3835,transcript_HQ_HBZL_transcript21571/f4p0/1084,transcript_HQ_HBZL_transcript6216/f7p0/2419,transcript_HQ_YNMLP_transcript2241/f2p0/3538,transcript_HQ_HBZL_transcript1773/f3p0/3337,transcript_HQ_YNLB_transcript2586/f3p0/3232,transcript_HQ_YNLB_transcript10871/f2p0/2104,transcript…
GO:0051716	cellular response to stimulus	biological_process	0.1276	1	1409	22033	2441	39009	transcript_HQ_YNLB_transcript2630/f2p0/3220,transcript_HQ_YNMLP_transcript2537/f2p0/3445,transcript_HQ_YNMLP_transcript1108/f2p0/4014,transcript_HQ_YNLB_transcript15010/f2p0/1639,transcript_HQ_YNLB_transcript20267/f2p0/914,transcript_HQ_YNMLP_transcript3660/f3p0/3170,transcript_HQ_YNLB_transcript12900/f2p0/1846,transcript_HQ_YNMLP_transcript16553/f2p0/1646,transcript_HQ_YNLB_transcript19144/f3p0/…
ipt25000/f4p0/711,transcript_HQ_YNLB_transcript2240/f7p0/3365,transcript_HQ_YNLB_transcript9973/f9p0/2182,transcript_HQ_YNMLP_transcript6442/f3p0/2738,transcript_HQ_HBZL_transcript23268/f2p0/913,transcript_HQ_SCJY_transcript16252/f3p0/1197,transcript_HQ_YNLB_transcript13218/f4p0/1882,transcript_HQ_YNMLP_transcript14049/f2p0/1926,transcript_HQ_HBZL_transcript19077/f2p0/1342,transcript_HQ_YNLB_tran…
GO:0017076	purine nucleotide binding	molecular_function	0.12772	1	3465	22033	5989	39009	transcript_HQ_HBZL_transcript22143/f2p0/1021,transcript_HQ_YNLB_transcript15541/f5p0/1581,transcript_HQ_YNMLP_transcript4202/f9p0/3060,transcript_HQ_HBZL_transcript1503/f2p0/3452,transcript_HQ_HBZL_transcript2948/f2p0/3004,transcript_HQ_YNLB_transcript751/f2p0/4186,transcript_HQ_YNMLP_transcript4559/f2p0/3001,transcript_HQ_HBZL_transcript8608/f5p0/2187,transcript_HQ_SCJY_transcript5581/f2p0/2470,…
p0/2749,transcript_HQ_HBZL_transcript15126/f2p0/1670,transcript_HQ_YNLB_transcript3265/f3p0/3035,transcript_HQ_HBZL_transcript765/f3p0/3979,transcript_HQ_HBZL_transcript4457/f5p0/2657,transcript_HQ_YNMLP_transcript12863/f2p0/2083,transcript_HQ_HBZL_transcript4511/f2p0/2656,transcript_HQ_SCJY_transcript16252/f3p0/1197,transcript_HQ_HBZL_transcript4198/f2p0/2724,transcript_HQ_YNMLP_transcript16697/…
1975/f3p0/1898,transcript_HQ_YNLB_transcript4093/f2p0/2875,transcript_HQ_HBZL_transcript6777/f2p0/2381,transcript_HQ_YNMLP_transcript5397/f11p0/2883,transcript_HQ_YNLB_transcript1085/f2p0/3896,transcript_HQ_SCJY_transcript1352/f2p0/3253,transcript_HQ_YNLB_transcript15853/f2p0/1523,transcript_HQ_SCJY_transcript10247/f3p0/1903,transcript_HQ_HBZL_transcript13361/f2p0/1811,transcript_HQ_HBZL_transcri…
nscript13611/f2p0/1779,transcript_HQ_HBZL_transcript2081/f2p0/3255,transcript_HQ_YNMLP_transcript405/f3p0/4907,transcript_HQ_SCEZ_transcript13431/f5p0/1759,transcript_HQ_HBZL_transcript13436/f2p0/1773,transcript_HQ_YNMLP_transcript7689/f10p0/2684,transcript_HQ_YNLB_transcript15419/f6p0/1582,transcript_HQ_HBZL_transcript234/f2p0/4962,transcript_HQ_YNLB_transcript9694/f2p0/2196,transcript_HQ_YNLB_t…
2371,transcript_HQ_HBZL_transcript1993/f2p0/3271,transcript_HQ_HBZL_transcript6591/f3p0/2463,transcript_HQ_SCJY_transcript8474/f2p0/2097,transcript_HQ_HBZL_transcript8000/f2p0/2244,transcript_HQ_YNMLP_transcript10288/f3p0/2338,transcript_HQ_YNMLP_transcript1308/f2p0/3895,transcript_HQ_SCJY_transcript5805/f2p0/2431,transcript_HQ_YNMLP_transcript2932/f3p0/3339,transcript_HQ_HBZL_transcript1508/f5p0…
GO:0045454	cell redox homeostasis	biological_process	0.1281	1	209	22033	357	39009	transcript_HQ_YNLB_transcript12247/f4p0/1931,transcript_HQ_SCJY_transcript10639/f2p0/1862,transcript_HQ_SCEZ_transcript18517/f3p0/1342,transcript_HQ_HBZL_transcript14419/f12p0/1729,transcript_HQ_YNLB_transcript12647/f2p0/1886,transcript_HQ_YNMLP_transcript4771/f4p0/2987,transcript_HQ_YNMLP_transcript18190/f4p0/1398,transcript_HQ_SCEZ_transcript17783/f6p0/1387,transcript_HQ_YNMLP_transcript14373/f…
GO:0000045	autophagosome assembly	biological_process	0.12839	1	18	22033	27	39009	transcript_HQ_HBZL_transcript160/f2p0/5350,transcript_HQ_HBZL_transcript24709/f2p0/748,transcript_HQ_YNMLP_transcript24622/f7p0/717,transcript_HQ_YNMLP_transcript25443/f9p0/638,transcript_HQ_YNMLP_transcript23989/f8p0/793,transcript_HQ_YNMLP_transcript9948/f3p0/2370,transcript_HQ_HBZL_transcript24432/f3p0/767,transcript_HQ_YNLB_transcript22275/f2p0/700,transcript_HQ_SCJY_transcript20509/f3p0/657,…
GO:0007033	vacuole organization	biological_process	0.12839	1	18	22033	27	39009	transcript_HQ_YNLB_transcript21837/f3p0/741,transcript_HQ_SCEZ_transcript22641/f2p0/919,transcript_HQ_HBZL_transcript24855/f5p0/725,transcript_HQ_YNLB_transcript22101/f2p0/700,transcript_HQ_HBZL_transcript25317/f6p0/680,transcript_HQ_HBZL_transcript25794/f2p0/647,transcript_HQ_SCEZ_transcript25613/f3p0/583,transcript_HQ_HBZL_transcript3728/f5p0/2796,transcript_HQ_HBZL_transcript24709/f2p0/748,tra…
GO:0016236	macroautophagy	biological_process	0.12839	1	18	22033	27	39009	transcript_HQ_YNMLP_transcript23989/f8p0/793,transcript_HQ_YNMLP_transcript9948/f3p0/2370,transcript_HQ_HBZL_transcript24432/f3p0/767,transcript_HQ_SCJY_transcript20509/f3p0/657,transcript_HQ_YNLB_transcript22275/f2p0/700,transcript_HQ_YNMLP_transcript23925/f5p0/802,transcript_HQ_HBZL_transcript160/f2p0/5350,transcript_HQ_HBZL_transcript24709/f2p0/748,transcript_HQ_YNMLP_transcript24622/f7p0/717,…
GO:0097159	organic cyclic compound binding	molecular_function	0.12841	1	7444	22033	13004	39009	transcript_HQ_SCEZ_transcript6251/f3p0/2384,transcript_HQ_YNMLP_transcript6892/f2p0/2691,transcript_HQ_YNLB_transcript14092/f3p0/1724,transcript_HQ_SCJY_transcript7383/f6p0/2239,transcript_HQ_HBZL_transcript12900/f2p0/1821,transcript_HQ_YNLB_transcript22/f2p0/7465,transcript_HQ_YNLB_transcript14107/f9p0/1756,transcript_HQ_HBZL_transcript16193/f8p0/1598,transcript_HQ_HBZL_transcript16585/f147p0/15…
cript20267/f2p0/914,transcript_HQ_YNLB_transcript14113/f2p0/1724,transcript_HQ_YNMLP_transcript24665/f6p0/715,transcript_HQ_HBZL_transcript21454/f4p0/1108,transcript_HQ_HBZL_transcript20182/f18p0/1220,transcript_HQ_YNLB_transcript7560/f3p0/2411,transcript_HQ_YNMLP_transcript1108/f2p0/4014,transcript_HQ_YNMLP_transcript2366/f5p0/3497,transcript_HQ_SCJY_transcript14940/f2p0/1347,transcript_HQ_YNMLP…
transcript3588/f5p0/2762,transcript_HQ_SCEZ_transcript5022/f13p0/2564,transcript_HQ_YNMLP_transcript12838/f2p0/2064,transcript_HQ_SCJY_transcript9031/f2p0/2047,transcript_HQ_SCEZ_transcript75/f6p0/6059,transcript_HQ_YNLB_transcript16530/f2p0/1441,transcript_HQ_HBZL_transcript10896/f3p0/2015,transcript_HQ_YNMLP_transcript16387/f2p0/1644,transcript_HQ_SCJY_transcript1910/f2p0/3030,transcript_HQ_YNL…
YNLB_transcript9775/f2p0/2216,transcript_HQ_HBZL_transcript15791/f4p0/1603,transcript_HQ_HBZL_transcript3368/f2p0/2865,transcript_HQ_HBZL_transcript8130/f5p0/2210,transcript_HQ_YNMLP_transcript11188/f8p0/2241,transcript_HQ_SCJY_transcript3041/f2p0/2763,transcript_HQ_HBZL_transcript12712/f7p0/1845,transcript_HQ_HBZL_transcript7920/f2p0/2264,transcript_HQ_YNMLP_transcript15237/f2p0/1804,transcript_…
3141/f7p0/3258,transcript_HQ_HBZL_transcript7821/f2p0/2235,transcript_HQ_HBZL_transcript17763/f5p0/1438,transcript_HQ_HBZL_transcript17220/f4p0/1515,transcript_HQ_YNMLP_transcript15266/f2p0/1788,transcript_HQ_YNMLP_transcript16023/f2p0/1686,transcript_HQ_HBZL_transcript240/f2p0/4922,transcript_HQ_SCJY_transcript3096/f7p0/2772,transcript_HQ_YNMLP_transcript23275/f4p0/810,transcript_HQ_HBZL_transcr…
4019/f5p0/1733,transcript_HQ_YNMLP_transcript130/f2p0/6021,transcript_HQ_HBZL_transcript19680/f10p0/1279,transcript_HQ_YNMLP_transcript306/f8p0/5111,transcript_HQ_HBZL_transcript3113/f7p0/2949,transcript_HQ_YNLB_transcript11713/f2p0/1968,transcript_HQ_YNMLP_transcript413/f2p0/4821,transcript_HQ_YNLB_transcript228/f2p0/5311,transcript_HQ_HBZL_transcript16678/f2p0/1578,transcript_HQ_YNLB_transcript…
nscript12685/f2p0/2115,transcript_HQ_HBZL_transcript12856/f3p0/1877,transcript_HQ_YNLB_transcript3172/f2p0/3112,transcript_HQ_HBZL_transcript19253/f2p0/1334,transcript_HQ_HBZL_transcript10437/f3p0/2009,transcript_HQ_SCJY_transcript9685/f2p0/1956,transcript_HQ_SCJY_transcript18804/f3p0/900,transcript_HQ_YNLB_transcript15399/f3p0/1588,transcript_HQ_HBZL_transcript16527/f2p0/1576,transcript_HQ_SCJY_…
2296,transcript_HQ_YNMLP_transcript9372/f2p0/2533,transcript_HQ_YNMLP_transcript14760/f3p0/1839,transcript_HQ_HBZL_transcript1588/f8p0/3421,transcript_HQ_HBZL_transcript9824/f2p0/2065,transcript_HQ_SCEZ_transcript16724/f2p0/1508,transcript_HQ_HBZL_transcript17007/f7p0/1528,transcript_HQ_YNLB_transcript2794/f2p0/3180,transcript_HQ_YNLB_transcript12686/f2p0/1905,transcript_HQ_YNMLP_transcript8690/f…
transcript434/f2p0/4360,transcript_HQ_YNMLP_transcript12070/f2p0/2142,transcript_HQ_HBZL_transcript20101/f4p0/1250,transcript_HQ_SCJY_transcript10359/f4p0/1895,transcript_HQ_YNLB_transcript16790/f5p0/1345,transcript_HQ_YNMLP_transcript9383/f2p0/2412,transcript_HQ_YNLB_transcript9755/f2p0/2171,transcript_HQ_HBZL_transcript9517/f7p0/2084,transcript_HQ_YNLB_transcript8645/f2p0/2303,transcript_HQ_HBZ…
pt_HQ_YNLB_transcript18595/f2p0/1142,transcript_HQ_YNMLP_transcript9075/f3p0/2472,transcript_HQ_YNLB_transcript5517/f6p0/2647,transcript_HQ_HBZL_transcript14477/f17p0/1627,transcript_HQ_YNLB_transcript12360/f2p0/1917,transcript_HQ_HBZL_transcript11951/f3p0/1900,transcript_HQ_YNLB_transcript21524/f12p0/784,transcript_HQ_HBZL_transcript5296/f2p0/2553,transcript_HQ_YNMLP_transcript5698/f2p0/2858,tra…
878,transcript_HQ_HBZL_transcript27/f2p0/6965,transcript_HQ_YNLB_transcript9262/f2p0/2233,transcript_HQ_SCEZ_transcript8429/f5p0/2155,transcript_HQ_YNMLP_transcript14774/f3p0/1921,transcript_HQ_HBZL_transcript17186/f2p0/1530,transcript_HQ_YNLB_transcript684/f3p0/4251,transcript_HQ_YNLB_transcript20559/f8p0/914,transcript_HQ_YNMLP_transcript17578/f2p0/1517,transcript_HQ_HBZL_transcript7940/f2p0/22…
GO:1901363	heterocyclic compound binding	molecular_function	0.12841	1	7444	22033	13004	39009	transcript_HQ_HBZL_transcript7180/f3p0/2346,transcript_HQ_HBZL_transcript1214/f3p0/3609,transcript_HQ_HBZL_transcript14998/f2p0/1687,transcript_HQ_YNMLP_transcript1715/f3p0/3770,transcript_HQ_HBZL_transcript18203/f4p0/1555,transcript_HQ_HBZL_transcript18672/f2p0/1385,transcript_HQ_YNLB_transcript10993/f8p0/2051,transcript_HQ_HBZL_transcript8282/f4p0/2188,transcript_HQ_YNLB_transcript4912/f2p0/277…
nscript_HQ_HBZL_transcript17733/f15p0/1423,transcript_HQ_SCJY_transcript17318/f2p0/1045,transcript_HQ_YNLB_transcript1015/f2p0/3941,transcript_HQ_YNLB_transcript18699/f2p0/1170,transcript_HQ_YNLB_transcript9463/f2p0/2206,transcript_HQ_YNLB_transcript557/f2p0/4388,transcript_HQ_HBZL_transcript6423/f5p0/2401,transcript_HQ_SCEZ_transcript9813/f3p0/2031,transcript_HQ_YNMLP_transcript21960/f2p0/984,tr…
t_HQ_YNLB_transcript1257/f2p0/3781,transcript_HQ_HBZL_transcript1210/f3p0/3628,transcript_HQ_YNLB_transcript1036/f9p0/4022,transcript_HQ_YNMLP_transcript3342/f3p0/3276,transcript_HQ_HBZL_transcript15398/f5p0/1678,transcript_HQ_YNMLP_transcript18400/f3p0/1397,transcript_HQ_HBZL_transcript1109/f5p0/3709,transcript_HQ_YNLB_transcript3434/f2p0/3022,transcript_HQ_HBZL_transcript8999/f2p0/2142,transcri…
3/f4p0/1826,transcript_HQ_HBZL_transcript14875/f6p0/1644,transcript_HQ_YNMLP_transcript7179/f2p0/2658,transcript_HQ_SCJY_transcript9221/f2p0/2040,transcript_HQ_HBZL_transcript14373/f5p0/1717,transcript_HQ_HBZL_transcript69/f9p0/6233,transcript_HQ_YNMLP_transcript7026/f24p0/2690,transcript_HQ_YNLB_transcript15206/f2p0/1634,transcript_HQ_YNMLP_transcript7383/f2p0/2699,transcript_HQ_HBZL_transcript1…
transcript218/f2p0/5390,transcript_HQ_YNMLP_transcript7700/f2p0/2624,transcript_HQ_HBZL_transcript644/f2p0/4068,transcript_HQ_HBZL_transcript7305/f2p0/2286,transcript_HQ_YNLB_transcript5546/f3p0/2637,transcript_HQ_YNMLP_transcript15182/f2p0/1805,transcript_HQ_HBZL_transcript4888/f6p0/2588,transcript_HQ_YNMLP_transcript3528/f8p0/3213,transcript_HQ_YNMLP_transcript1470/f2p0/3870,transcript_HQ_YNMLP…
nscript52/f2p0/6788,transcript_HQ_YNLB_transcript11117/f3p0/2032,transcript_HQ_YNLB_transcript2321/f2p0/3368,transcript_HQ_HBZL_transcript24008/f2p0/816,transcript_HQ_SCJY_transcript8841/f10p0/2127,transcript_HQ_YNMLP_transcript1443/f5p0/3820,transcript_HQ_YNLB_transcript7795/f2p0/2414,transcript_HQ_HBZL_transcript3343/f2p0/2860,transcript_HQ_HBZL_transcript24835/f2p0/745,transcript_HQ_HBZL_trans…
_HQ_HBZL_transcript3368/f2p0/2865,transcript_HQ_SCEZ_transcript19910/f12p0/1201,transcript_HQ_HBZL_transcript10671/f2p0/1988,transcript_HQ_HBZL_transcript4395/f2p0/2720,transcript_HQ_HBZL_transcript17734/f8p0/1468,transcript_LQ_YNMLP_transcript18102/f2p0/1431,transcript_HQ_YNLB_transcript10844/f2p0/2074,transcript_HQ_YNMLP_transcript6021/f6p0/2797,transcript_HQ_YNMLP_transcript15237/f2p0/1804,tra…
ipt17763/f5p0/1438,transcript_HQ_HBZL_transcript7821/f2p0/2235,transcript_HQ_HBZL_transcript549/f2p0/4212,transcript_HQ_YNLB_transcript1577/f2p0/3653,transcript_HQ_YNLB_transcript5127/f2p0/2736,transcript_HQ_YNLB_transcript298/f2p0/4990,transcript_HQ_YNMLP_transcript18454/f4p0/1386,transcript_HQ_YNMLP_transcript3887/f2p0/3151,transcript_HQ_YNLB_transcript10614/f3p0/2112,transcript_HQ_YNMLP_transc…
492,transcript_HQ_HBZL_transcript7826/f5p0/2241,transcript_HQ_YNMLP_transcript14012/f3p0/1965,transcript_HQ_HBZL_transcript7849/f6p0/2235,transcript_HQ_YNLB_transcript14221/f9p0/1704,transcript_HQ_YNLB_transcript2073/f2p0/3420,transcript_HQ_YNMLP_transcript5658/f392p0/2758,transcript_HQ_YNLB_transcript595/f5p0/4323,transcript_HQ_SCEZ_transcript18083/f8p0/1393,transcript_HQ_HBZL_transcript11144/f3…
pt1661/f2p0/3711,transcript_HQ_HBZL_transcript1687/f2p0/3375,transcript_HQ_YNMLP_transcript13767/f5p0/1964,transcript_HQ_YNLB_transcript21111/f6p0/826,transcript_HQ_HBZL_transcript22790/f5p0/951,transcript_HQ_HBZL_transcript4123/f14p0/2726,transcript_HQ_SCJY_transcript13069/f2p0/1599,transcript_HQ_HBZL_transcript19536/f14p0/1226,transcript_HQ_YNLB_transcript3781/f8p0/3020,transcript_HQ_HBZL_trans…
HQ_YNMLP_transcript5350/f2p0/2895,transcript_HQ_HBZL_transcript21540/f2p0/1089,transcript_HQ_HBZL_transcript14480/f8p0/1718,transcript_HQ_YNMLP_transcript1161/f3p0/4007,transcript_HQ_SCJY_transcript669/f2p0/3649,transcript_HQ_YNMLP_transcript7444/f2p0/2622,transcript_HQ_HBZL_transcript17690/f2p0/1487,transcript_HQ_YNMLP_transcript18160/f4p0/1434,transcript_HQ_YNMLP_transcript8183/f2p0/2563,transc…
GO:0001882	nucleoside binding	molecular_function	0.12843	1	3423	22033	5915	39009	transcript_HQ_SCJY_transcript13879/f5p0/1507,transcript_HQ_HBZL_transcript5019/f2p0/2591,transcript_HQ_SCJY_transcript7957/f3p0/2152,transcript_HQ_YNLB_transcript11807/f3p0/1950,transcript_HQ_YNMLP_transcript4071/f3p0/3089,transcript_HQ_HBZL_transcript7585/f2p0/2265,transcript_HQ_YNMLP_transcript10097/f2p0/2356,transcript_HQ_SCEZ_transcript19204/f2p0/1270,transcript_HQ_HBZL_transcript703/f3p0/401…
pt12227/f2p0/2133,transcript_HQ_HBZL_transcript15978/f3p0/1614,transcript_HQ_HBZL_transcript5916/f7p0/2450,transcript_HQ_HBZL_transcript12188/f2p0/1875,transcript_HQ_HBZL_transcript10012/f4p0/2039,transcript_HQ_SCJY_transcript10041/f4p0/1922,transcript_HQ_YNLB_transcript16643/f4p0/1407,transcript_HQ_SCJY_transcript341/f2p0/3956,transcript_HQ_YNMLP_transcript7867/f2p0/2593,transcript_HQ_HBZL_trans…
/5222,transcript_HQ_YNMLP_transcript21283/f4p0/1068,transcript_HQ_YNMLP_transcript13168/f2p0/2025,transcript_HQ_YNLB_transcript1436/f3p0/3694,transcript_HQ_HBZL_transcript716/f2p0/4014,transcript_HQ_SCJY_transcript65/f2p0/4853,transcript_HQ_SCJY_transcript8611/f4p0/2058,transcript_HQ_HBZL_transcript1621/f3p0/3369,transcript_HQ_HBZL_transcript7043/f2p0/2386,transcript_HQ_HBZL_transcript6437/f2p0/2…
9,transcript_HQ_YNMLP_transcript8438/f3p0/2538,transcript_HQ_HBZL_transcript6839/f2p0/2344,transcript_HQ_HBZL_transcript13566/f17p0/1769,transcript_HQ_HBZL_transcript863/f3p0/3873,transcript_HQ_YNMLP_transcript3145/f2p0/3293,transcript_HQ_SCEZ_transcript19495/f3p0/1265,transcript_HQ_HBZL_transcript187/f133p0/4743,transcript_HQ_YNMLP_transcript3721/f5p0/3180,transcript_HQ_HBZL_transcript283/f5p0/4…
_HQ_YNMLP_transcript21173/f4p0/1076,transcript_HQ_YNMLP_transcript2406/f2p0/3466,transcript_HQ_YNLB_transcript3598/f2p0/3001,transcript_HQ_SCJY_transcript15204/f2p0/1321,transcript_HQ_HBZL_transcript8506/f2p0/2178,transcript_HQ_HBZL_transcript23402/f2p0/880,transcript_HQ_HBZL_transcript14055/f15p0/1696,transcript_HQ_YNLB_transcript1885/f2p0/3501,transcript_HQ_YNMLP_transcript21894/f4p0/986,transc…
GO:0005525	GTP binding	molecular_function	0.12849	1	665	22033	1132	39009	transcript_HQ_HBZL_transcript7788/f2p0/2240,transcript_HQ_YNMLP_transcript5844/f3p0/2807,transcript_HQ_HBZL_transcript18181/f5p0/1430,transcript_HQ_HBZL_transcript179/f3p0/5197,transcript_HQ_YNMLP_transcript13006/f5p0/1992,transcript_HQ_HBZL_transcript2661/f10p0/3053,transcript_HQ_YNMLP_transcript405/f3p0/4907,transcript_HQ_SCJY_transcript9523/f2p0/2009,transcript_HQ_HBZL_transcript234/f2p0/4962,…
GO:0032561	guanyl ribonucleotide binding	molecular_function	0.12849	1	665	22033	1132	39009	transcript_HQ_HBZL_transcript4469/f3p0/2665,transcript_HQ_YNLB_transcript13308/f2p0/1818,transcript_HQ_SCJY_transcript8156/f12p0/2140,transcript_HQ_YNLB_transcript264/f3p0/5072,transcript_HQ_YNMLP_transcript8749/f8p0/2512,transcript_HQ_YNMLP_transcript10288/f3p0/2338,transcript_HQ_SCEZ_transcript21370/f5p0/1067,transcript_HQ_YNMLP_transcript16106/f2p0/1696,transcript_HQ_HBZL_transcript21563/f4p0/…
GO:0006276	plasmid maintenance	biological_process	0.12861	1	6	22033	7	39009	transcript_HQ_HBZL_transcript3436/f2p0/2887,transcript_HQ_YNLB_transcript3003/f3p0/3120,transcript_HQ_HBZL_transcript4383/f2p0/2712,transcript_HQ_YNLB_transcript17668/f3p0/1263,transcript_HQ_HBZL_transcript12870/f4p0/1820,transcript_HQ_HBZL_transcript887/f3p0/3849
GO:0010605	negative regulation of macromolecule metabolic process	biological_process	0.12918	1	65	22033	103	39009	transcript_HQ_SCEZ_transcript19783/f4p0/1209,transcript_HQ_HBZL_transcript14890/f3p0/1688,transcript_HQ_HBZL_transcript15681/f3p0/1684,transcript_HQ_YNLB_transcript8182/f4p0/2371,transcript_HQ_YNMLP_transcript18728/f2p0/1363,transcript_HQ_YNLB_transcript2119/f2p0/3387,transcript_HQ_YNMLP_transcript12236/f5p0/2140,transcript_HQ_HBZL_transcript3360/f5p0/2869,transcript_HQ_SCJY_transcript19926/f2p0/…
GO:0033014	tetrapyrrole biosynthetic process	biological_process	0.12956	1	135	22033	223	39009	transcript_HQ_YNMLP_transcript12362/f7p0/2121,transcript_HQ_HBZL_transcript17384/f2p0/996,transcript_HQ_HBZL_transcript1979/f15p0/3272,transcript_HQ_YNMLP_transcript26362/f2p0/552,transcript_HQ_YNMLP_transcript7437/f3p0/2628,transcript_HQ_YNMLP_transcript4380/f2p0/3030,transcript_HQ_HBZL_transcript18584/f3p0/1402,transcript_HQ_HBZL_transcript11310/f10p0/1927,transcript_HQ_HBZL_transcript17039/f23…
GO:0030515	snoRNA binding	molecular_function	0.1306	1	11	22033	15	39009	transcript_HQ_YNLB_transcript6353/f18p0/2559,transcript_HQ_SCEZ_transcript3588/f5p0/2762,transcript_HQ_HBZL_transcript4646/f25p0/2576,transcript_HQ_HBZL_transcript9166/f2p0/2111,transcript_HQ_HBZL_transcript3959/f6p0/2776,transcript_HQ_YNMLP_transcript7387/f2p0/2635,transcript_HQ_YNMLP_transcript26667/f2p0/520,transcript_HQ_SCJY_transcript4705/f3p0/2568,transcript_HQ_HBZL_transcript3905/f7p0/2707…
GO:0070925	organelle assembly	biological_process	0.13145	1	88	22033	145	39009	transcript_HQ_YNMLP_transcript20158/f2p0/1197,transcript_HQ_HBZL_transcript579/f8p0/4145,transcript_HQ_HBZL_transcript27226/f2p0/480,transcript_HQ_YNMLP_transcript4148/f2p0/3087,transcript_HQ_YNMLP_transcript23989/f8p0/793,transcript_HQ_YNLB_transcript4664/f2p0/2815,transcript_HQ_HBZL_transcript19012/f2p0/1350,transcript_HQ_YNLB_transcript5390/f2p0/2681,transcript_HQ_HBZL_transcript22684/f10p0/96…
GO:0008964	phosphoenolpyruvate carboxylase activity	molecular_function	0.13195	1	21	22033	30	39009	transcript_HQ_SCEZ_transcript1362/f2p0/3432,transcript_HQ_YNLB_transcript1657/f6p0/3542,transcript_HQ_SCJY_transcript7678/f2p0/2187,transcript_HQ_HBZL_transcript1495/f5p0/3479,transcript_HQ_HBZL_transcript740/f2p0/3966,transcript_HQ_YNLB_transcript1916/f2p0/3461,transcript_HQ_YNMLP_transcript6479/f6p0/2736,transcript_HQ_HBZL_transcript1861/f2p0/3294,transcript_HQ_YNMLP_transcript2567/f14p0/3446,t…
GO:0010558	negative regulation of macromolecule biosynthetic process	biological_process	0.13274	1	22	22033	32	39009	transcript_HQ_HBZL_transcript14890/f3p0/1688,transcript_HQ_HBZL_transcript15681/f3p0/1684,transcript_HQ_YNMLP_transcript551/f3p0/4510,transcript_HQ_YNMLP_transcript1586/f9p0/3815,transcript_HQ_YNLB_transcript2119/f2p0/3387,transcript_HQ_HBZL_transcript3360/f5p0/2869,transcript_HQ_HBZL_transcript19273/f2p0/1325,transcript_HQ_HBZL_transcript2145/f2p0/3207,transcript_HQ_YNMLP_transcript6845/f2p0/269…
GO:0031327	negative regulation of cellular biosynthetic process	biological_process	0.13274	1	22	22033	32	39009	transcript_HQ_YNMLP_transcript1179/f3p0/3987,transcript_HQ_YNMLP_transcript2822/f2p0/3363,transcript_HQ_SCEZ_transcript16277/f3p0/1539,transcript_HQ_HBZL_transcript9634/f5p0/2078,transcript_HQ_HBZL_transcript10592/f2p0/1999,transcript_HQ_HBZL_transcript2145/f2p0/3207,transcript_HQ_HBZL_transcript19273/f2p0/1325,transcript_HQ_HBZL_transcript2173/f5p0/3243,transcript_HQ_YNMLP_transcript6845/f2p0/26…
GO:0051172	negative regulation of nitrogen compound metabolic process	biological_process	0.13274	1	22	22033	32	39009	transcript_HQ_YNMLP_transcript7075/f2p0/2680,transcript_HQ_HBZL_transcript1962/f12p0/3220,transcript_HQ_YNMLP_transcript5763/f3p0/2830,transcript_HQ_YNMLP_transcript2142/f2p0/3584,transcript_HQ_YNLB_transcript4321/f6p0/2906,transcript_HQ_YNLB_transcript3442/f7p0/3011,transcript_HQ_HBZL_transcript13784/f2p0/1764,transcript_HQ_HBZL_transcript19273/f2p0/1325,transcript_HQ_HBZL_transcript2145/f2p0/32…
GO:2000113	negative regulation of cellular macromolecule biosynthetic process	biological_process	0.13274	1	22	22033	32	39009	transcript_HQ_YNLB_transcript3442/f7p0/3011,transcript_HQ_HBZL_transcript13784/f2p0/1764,transcript_HQ_YNMLP_transcript2142/f2p0/3584,transcript_HQ_YNMLP_transcript7075/f2p0/2680,transcript_HQ_YNMLP_transcript5763/f3p0/2830,transcript_HQ_HBZL_transcript1962/f12p0/3220,transcript_HQ_YNLB_transcript4321/f6p0/2906,transcript_HQ_YNMLP_transcript1179/f3p0/3987,transcript_HQ_SCEZ_transcript16277/f3p0/1…
GO:0019001	guanyl nucleotide binding	molecular_function	0.13291	1	674	22033	1148	39009	transcript_HQ_YNMLP_transcript855/f9p0/4177,transcript_HQ_YNMLP_transcript3166/f4p0/3276,transcript_HQ_YNMLP_transcript8998/f2p0/2374,transcript_HQ_YNMLP_transcript21718/f9p0/1018,transcript_HQ_SCJY_transcript11005/f5p0/1829,transcript_HQ_HBZL_transcript8685/f2p0/2015,transcript_HQ_YNMLP_transcript16507/f6p0/1747,transcript_HQ_HBZL_transcript2044/f2p0/3254,transcript_HQ_SCEZ_transcript305/f6p0/45…
GO:0046912	transferase activity, transferring acyl groups, acyl groups converted into alkyl on transfer	molecular_function	0.13355	1	29	22033	44	39009	transcript_HQ_YNLB_transcript11311/f11p0/2011,transcript_HQ_HBZL_transcript10423/f3p0/2051,transcript_HQ_YNMLP_transcript14414/f2p0/1874,transcript_HQ_YNMLP_transcript9541/f2p0/2402,transcript_HQ_HBZL_transcript14301/f4p0/1747,transcript_HQ_YNMLP_transcript15652/f5p0/1746,transcript_HQ_YNMLP_transcript11824/f2p0/2225,transcript_HQ_YNLB_transcript14539/f2p0/1678,transcript_HQ_SCJY_transcript9097/f…
GO:0016832	aldehyde-lyase activity	molecular_function	0.13484	1	30	22033	46	39009	transcript_HQ_YNMLP_transcript18284/f3p0/1416,transcript_HQ_SCJY_transcript15787/f5p0/1240,transcript_HQ_YNMLP_transcript17848/f13p0/1405,transcript_HQ_YNLB_transcript16878/f2p0/1375,transcript_HQ_YNMLP_transcript7131/f4p0/2675,transcript_HQ_YNLB_transcript16847/f2p0/1435,transcript_HQ_YNLB_transcript16310/f9p0/1489,transcript_HQ_HBZL_transcript17987/f17p0/1443,transcript_HQ_HBZL_transcript3727/f…
GO:0016843	amine-lyase activity	molecular_function	0.13514	1	27	22033	41	39009	transcript_HQ_HBZL_transcript16935/f2p0/1548,transcript_HQ_HBZL_transcript13133/f3p0/1826,transcript_HQ_YNLB_transcript16741/f2p0/1402,transcript_HQ_HBZL_transcript13246/f4p0/1819,transcript_HQ_SCJY_transcript20590/f6p0/730,transcript_HQ_HBZL_transcript13507/f8p0/1802,transcript_HQ_YNMLP_transcript14298/f2p0/1911,transcript_HQ_SCJY_transcript9166/f2p0/2046,transcript_HQ_HBZL_transcript10745/f2p0/…
GO:0016844	strictosidine synthase activity	molecular_function	0.13514	1	27	22033	41	39009	transcript_HQ_YNLB_transcript13332/f3p0/1804,transcript_HQ_HBZL_transcript15663/f2p0/1639,transcript_HQ_HBZL_transcript20181/f21p0/1249,transcript_HQ_YNMLP_transcript19163/f2p0/1331,transcript_HQ_HBZL_transcript19357/f2p0/1315,transcript_HQ_YNLB_transcript9514/f3p0/2226,transcript_HQ_HBZL_transcript18144/f2p0/1442,transcript_HQ_YNMLP_transcript15594/f2p0/1740,transcript_HQ_SCJY_transcript11695/f2…
GO:0009991	response to extracellular stimulus	biological_process	0.13555	1	21	22033	32	39009	transcript_HQ_SCEZ_transcript22641/f2p0/919,transcript_HQ_HBZL_transcript24855/f5p0/725,transcript_HQ_YNLB_transcript22101/f2p0/700,transcript_HQ_YNLB_transcript21837/f3p0/741,transcript_HQ_HBZL_transcript25794/f2p0/647,transcript_HQ_SCEZ_transcript25613/f3p0/583,transcript_HQ_HBZL_transcript3728/f5p0/2796,transcript_HQ_HBZL_transcript25317/f6p0/680,transcript_HQ_YNMLP_transcript10538/f2p0/2339,t…
GO:0031668	cellular response to extracellular stimulus	biological_process	0.13555	1	21	22033	32	39009	transcript_HQ_SCEZ_transcript22641/f2p0/919,transcript_HQ_HBZL_transcript24855/f5p0/725,transcript_HQ_YNLB_transcript22101/f2p0/700,transcript_HQ_YNLB_transcript21837/f3p0/741,transcript_HQ_HBZL_transcript25794/f2p0/647,transcript_HQ_HBZL_transcript3728/f5p0/2796,transcript_HQ_SCEZ_transcript25613/f3p0/583,transcript_HQ_HBZL_transcript25317/f6p0/680,transcript_HQ_YNMLP_transcript25443/f9p0/638,tr…
GO:0071496	cellular response to external stimulus	biological_process	0.13555	1	21	22033	32	39009	transcript_HQ_YNMLP_transcript25443/f9p0/638,transcript_HQ_YNMLP_transcript24622/f7p0/717,transcript_HQ_HBZL_transcript3400/f2p0/2888,transcript_HQ_YNMLP_transcript10538/f2p0/2339,transcript_HQ_HBZL_transcript3649/f2p0/2802,transcript_HQ_HBZL_transcript24709/f2p0/748,transcript_HQ_HBZL_transcript160/f2p0/5350,transcript_HQ_YNMLP_transcript23925/f5p0/802,transcript_HQ_SCJY_transcript20509/f3p0/657…
GO:0016788	hydrolase activity, acting on ester bonds	molecular_function	0.13577	1	805	22033	1385	39009	transcript_HQ_HBZL_transcript23989/f2p0/816,transcript_HQ_YNMLP_transcript6533/f7p0/2733,transcript_HQ_YNMLP_transcript21429/f6p0/1041,transcript_HQ_HBZL_transcript11821/f2p0/1902,transcript_HQ_YNLB_transcript687/f2p0/4243,transcript_HQ_SCEZ_transcript159/f2p0/5314,transcript_HQ_HBZL_transcript15695/f5p0/1637,transcript_HQ_HBZL_transcript19573/f3p0/1320,transcript_HQ_SCJY_transcript12826/f5p0/164…
transcript_HQ_HBZL_transcript7981/f3p0/2224,transcript_HQ_HBZL_transcript6103/f10p0/2456,transcript_HQ_YNMLP_transcript8686/f2p0/2567,transcript_HQ_YNMLP_transcript15240/f2p0/1786,transcript_HQ_YNMLP_transcript21063/f3p0/1085,transcript_HQ_YNLB_transcript10845/f2p0/2065,transcript_HQ_SCJY_transcript18240/f2p0/975,transcript_HQ_YNLB_transcript2073/f2p0/3420,transcript_HQ_HBZL_transcript2184/f6p0/3…
GO:0015159	polysaccharide transmembrane transporter activity	molecular_function	0.13688	1	38	22033	61	39009	transcript_HQ_HBZL_transcript26324/f7p0/588,transcript_HQ_YNLB_transcript20550/f7p0/897,transcript_HQ_YNMLP_transcript23983/f3p0/775,transcript_HQ_YNMLP_transcript16609/f3p0/1626,transcript_HQ_SCJY_transcript19600/f2p0/805,transcript_HQ_YNMLP_transcript4139/f2p0/3067,transcript_HQ_YNLB_transcript21161/f6p0/843,transcript_HQ_HBZL_transcript6680/f5p0/2367,transcript_HQ_SCJY_transcript20038/f4p0/771…
GO:0015774	polysaccharide transport	biological_process	0.13688	1	38	22033	61	39009	transcript_HQ_HBZL_transcript23991/f3p0/815,transcript_HQ_SCJY_transcript18464/f5p0/915,transcript_HQ_YNMLP_transcript26684/f2p0/513,transcript_HQ_SCEZ_transcript14030/f2p0/1729,transcript_HQ_HBZL_transcript24687/f9p0/772,transcript_HQ_HBZL_transcript22206/f36p0/923,transcript_HQ_HBZL_transcript20567/f2p0/1187,transcript_HQ_HBZL_transcript24124/f6p0/818,transcript_HQ_YNMLP_transcript22157/f10p0/9…
GO:0033037	polysaccharide localization	biological_process	0.13688	1	38	22033	61	39009	transcript_HQ_YNMLP_transcript4139/f2p0/3067,transcript_HQ_YNMLP_transcript16609/f3p0/1626,transcript_HQ_SCJY_transcript19600/f2p0/805,transcript_HQ_YNMLP_transcript23983/f3p0/775,transcript_HQ_YNLB_transcript20550/f7p0/897,transcript_HQ_HBZL_transcript26324/f7p0/588,transcript_HQ_YNLB_transcript19380/f3p0/1024,transcript_HQ_HBZL_transcript22658/f13p0/972,transcript_HQ_HBZL_transcript24386/f4p0/7…
GO:0046806	viral scaffold	cellular_component	0.13714	1	23	22033	34	39009	transcript_HQ_HBZL_transcript3741/f2p0/2787,transcript_HQ_YNMLP_transcript19800/f2p0/1236,transcript_HQ_SCEZ_transcript4655/f2p0/2585,transcript_HQ_YNLB_transcript14677/f4p0/1673,transcript_HQ_YNMLP_transcript24633/f3p0/755,transcript_HQ_YNMLP_transcript7879/f3p0/2588,transcript_HQ_HBZL_transcript579/f8p0/4145,transcript_HQ_YNLB_transcript2954/f3p0/3159,transcript_HQ_SCEZ_transcript17154/f2p0/147…
GO:0030554	adenyl nucleotide binding	molecular_function	0.13772	1	3214	22033	5551	39009	transcript_HQ_YNLB_transcript3829/f4p0/2932,transcript_HQ_HBZL_transcript10753/f3p0/2021,transcript_HQ_YNMLP_transcript191/f4p0/5635,transcript_HQ_YNLB_transcript4403/f4p0/2828,transcript_HQ_YNLB_transcript302/f2p0/4942,transcript_HQ_YNLB_transcript3474/f2p0/3008,transcript_HQ_HBZL_transcript8493/f2p0/2189,transcript_HQ_SCJY_transcript4017/f3p0/2619,transcript_HQ_HBZL_transcript5575/f2p0/2009,tra…
9,transcript_HQ_SCJY_transcript14758/f2p0/1440,transcript_HQ_HBZL_transcript13586/f3p0/1793,transcript_HQ_HBZL_transcript13963/f4p0/1735,transcript_HQ_YNMLP_transcript514/f2p0/4607,transcript_HQ_YNMLP_transcript14688/f2p0/1865,transcript_HQ_HBZL_transcript1240/f7p0/3589,transcript_HQ_HBZL_transcript22485/f11p0/985,transcript_HQ_HBZL_transcript8284/f7p0/2189,transcript_HQ_HBZL_transcript6723/f6p0/…
ipt10078/f3p0/2049,transcript_HQ_SCJY_transcript8377/f2p0/2139,transcript_HQ_SCJY_transcript13073/f2p0/1604,transcript_HQ_YNMLP_transcript9942/f10p0/2349,transcript_HQ_HBZL_transcript21119/f3p0/1158,transcript_HQ_SCJY_transcript9628/f2p0/1991,transcript_HQ_YNLB_transcript952/f2p0/3987,transcript_HQ_HBZL_transcript18759/f2p0/1374,transcript_HQ_HBZL_transcript1386/f4p0/3516,transcript_HQ_HBZL_trans…
L_transcript6697/f2p0/2369,transcript_HQ_HBZL_transcript753/f2p0/3962,transcript_HQ_HBZL_transcript21763/f3p0/1062,transcript_HQ_YNMLP_transcript18487/f3p0/1415,transcript_HQ_YNLB_transcript10399/f2p0/2151,transcript_HQ_YNMLP_transcript7241/f2p0/2654,transcript_HQ_YNMLP_transcript21558/f3p0/957,transcript_HQ_YNLB_transcript14565/f3p0/1686,transcript_HQ_HBZL_transcript132/f2p0/5647,transcript_HQ_Y…
cript6715/f3p0/2740,transcript_HQ_SCEZ_transcript3930/f2p0/2697,transcript_HQ_YNMLP_transcript16690/f2p0/1633,transcript_HQ_HBZL_transcript16281/f2p0/1599,transcript_HQ_SCJY_transcript10101/f7p0/1935,transcript_HQ_YNMLP_transcript8227/f3p0/2556,transcript_HQ_SCEZ_transcript16948/f2p0/1496,transcript_HQ_YNMLP_transcript7575/f3p0/2605,transcript_HQ_SCJY_transcript6114/f2p0/2368,transcript_HQ_HBZL_t…
GO:0006020	inositol metabolic process	biological_process	0.13806	1	11	22033	15	39009	transcript_HQ_HBZL_transcript8871/f4p0/2045,transcript_HQ_HBZL_transcript20923/f4p0/1166,transcript_HQ_HBZL_transcript21040/f31p0/1133,transcript_HQ_HBZL_transcript13611/f2p0/1852,transcript_HQ_SCEZ_transcript9959/f9p0/2036,transcript_HQ_YNMLP_transcript13268/f2p0/2006,transcript_HQ_YNMLP_transcript10527/f3p0/2306,transcript_HQ_HBZL_transcript10998/f12p0/1946,transcript_HQ_HBZL_transcript4358/f2p…
GO:0043531	ADP binding	molecular_function	0.13812	1	186	22033	304	39009	transcript_HQ_HBZL_transcript3358/f2p0/2862,transcript_HQ_YNLB_transcript1782/f2p0/3521,transcript_HQ_YNLB_transcript2410/f2p0/3309,transcript_HQ_SCEZ_transcript542/f2p0/4136,transcript_HQ_YNMLP_transcript12369/f2p0/2117,transcript_HQ_HBZL_transcript568/f2p0/4158,transcript_HQ_HBZL_transcript2897/f7p0/2971,transcript_HQ_SCJY_transcript12760/f7p0/1652,transcript_HQ_SCJY_transcript16854/f2p0/1149,t…
GO:0003917	DNA topoisomerase type I activity	molecular_function	0.13839	1	6	22033	7	39009	transcript_HQ_HBZL_transcript641/f2p0/4072,transcript_HQ_SCEZ_transcript1895/f2p0/3246,transcript_HQ_HBZL_transcript2251/f6p0/3165,transcript_HQ_SCJY_transcript4235/f3p0/2591,transcript_HQ_HBZL_transcript2116/f3p0/3250,transcript_HQ_YNMLP_transcript3445/f2p0/3200
GO:0044711	single-organism biosynthetic process	biological_process	0.13889	1	1152	22033	1992	39009	transcript_HQ_HBZL_transcript16778/f2p0/1571,transcript_HQ_HBZL_transcript9747/f2p0/2084,transcript_HQ_HBZL_transcript518/f2p0/4202,transcript_HQ_YNMLP_transcript12018/f3p0/2159,transcript_HQ_YNLB_transcript14544/f5p0/1693,transcript_HQ_HBZL_transcript12195/f2p0/1871,transcript_HQ_SCJY_transcript13806/f2p0/1517,transcript_HQ_SCJY_transcript12022/f2p0/1715,transcript_HQ_YNMLP_transcript13425/f3p0/…
6/f2p0/1809,transcript_HQ_YNMLP_transcript16015/f2p0/1705,transcript_HQ_YNLB_transcript2436/f2p0/3319,transcript_HQ_YNLB_transcript5993/f2p0/2637,transcript_HQ_HBZL_transcript16902/f4p0/1547,transcript_HQ_YNMLP_transcript195/f2p0/5634,transcript_HQ_YNLB_transcript8971/f7p0/2255,transcript_HQ_YNMLP_transcript14766/f5p0/1851,transcript_HQ_YNMLP_transcript17316/f2p0/1538,transcript_HQ_HBZL_transcrip…
GO:0005976	polysaccharide metabolic process	biological_process	0.14019	1	160	22033	264	39009	transcript_HQ_HBZL_transcript422/f2p0/4400,transcript_HQ_YNLB_transcript20092/f6p0/996,transcript_HQ_HBZL_transcript11305/f3p0/1941,transcript_HQ_HBZL_transcript20259/f10p0/1222,transcript_HQ_SCEZ_transcript16720/f3p0/1498,transcript_HQ_HBZL_transcript374/f2p0/4487,transcript_HQ_YNMLP_transcript4516/f2p0/3034,transcript_HQ_HBZL_transcript21126/f2p0/1135,transcript_HQ_HBZL_transcript24099/f4p0/835…
GO:0000151	ubiquitin ligase complex	cellular_component	0.14027	1	299	22033	508	39009	transcript_HQ_HBZL_transcript18141/f5p0/1433,transcript_HQ_HBZL_transcript1118/f3p0/3695,transcript_HQ_YNMLP_transcript9533/f3p0/2402,transcript_HQ_YNLB_transcript17905/f2p0/1240,transcript_HQ_YNLB_transcript22508/f2p0/668,transcript_HQ_YNMLP_transcript20959/f3p0/1092,transcript_HQ_SCJY_transcript1604/f2p0/3130,transcript_HQ_HBZL_transcript20161/f5p0/1256,transcript_HQ_HBZL_transcript21096/f2p0/1…
GO:0044763	single-organism cellular process	biological_process	0.14096	1	5416	22033	9485	39009	transcript_HQ_HBZL_transcript21590/f4p0/1106,transcript_HQ_YNMLP_transcript15811/f3p0/1735,transcript_HQ_HBZL_transcript23549/f2p0/861,transcript_HQ_YNLB_transcript9733/f2p0/2183,transcript_HQ_HBZL_transcript5265/f2p0/2544,transcript_HQ_YNMLP_transcript13455/f4p0/1945,transcript_HQ_YNMLP_transcript24239/f2p0/748,transcript_HQ_HBZL_transcript1894/f5p0/3295,transcript_HQ_HBZL_transcript6345/f2p0/24…
transcript_HQ_HBZL_transcript3961/f5p0/2770,transcript_HQ_YNMLP_transcript2251/f3p0/3531,transcript_HQ_YNLB_transcript11870/f7p0/1943,transcript_HQ_HBZL_transcript3804/f2p0/2825,transcript_HQ_HBZL_transcript16342/f12p0/1580,transcript_HQ_YNLB_transcript12247/f4p0/1931,transcript_HQ_YNMLP_transcript18240/f2p0/1429,transcript_HQ_YNLB_transcript18854/f3p0/1116,transcript_HQ_YNLB_transcript900/f2p0/4…
t_HQ_SCEZ_transcript23678/f5p0/794,transcript_HQ_HBZL_transcript4100/f2p0/2723,transcript_HQ_HBZL_transcript14617/f3p0/1716,transcript_HQ_HBZL_transcript8693/f9p0/2171,transcript_HQ_YNLB_transcript11071/f5p0/2056,transcript_HQ_YNLB_transcript4548/f2p0/2791,transcript_HQ_HBZL_transcript19698/f2p0/1319,transcript_HQ_YNMLP_transcript13151/f2p0/2029,transcript_HQ_HBZL_transcript12586/f2p0/1842,transc…
t17314/f23p0/1546,transcript_HQ_SCEZ_transcript2460/f2p0/3034,transcript_HQ_HBZL_transcript7928/f2p0/2232,transcript_HQ_HBZL_transcript1986/f2p0/3216,transcript_HQ_SCJY_transcript4858/f2p0/2513,transcript_HQ_YNMLP_transcript17790/f3p0/1502,transcript_HQ_YNLB_transcript16189/f2p0/1489,transcript_HQ_YNMLP_transcript4506/f2p0/3017,transcript_HQ_HBZL_transcript2210/f2p0/3184,transcript_HQ_YNLB_transc…
ipt_HQ_SCEZ_transcript305/f6p0/4587,transcript_HQ_YNMLP_transcript20841/f2p0/1152,transcript_HQ_YNMLP_transcript1085/f3p0/4009,transcript_HQ_YNMLP_transcript11402/f2p0/2247,transcript_HQ_HBZL_transcript10119/f4p0/2042,transcript_HQ_YNLB_transcript8009/f4p0/2381,transcript_HQ_HBZL_transcript8632/f2p0/2153,transcript_HQ_HBZL_transcript14793/f4p0/1731,transcript_HQ_HBZL_transcript13156/f3p0/1814,tra…
anscript30/f3p0/6883,transcript_HQ_HBZL_transcript9865/f20p0/2053,transcript_HQ_YNLB_transcript158/f2p0/5768,transcript_HQ_YNMLP_transcript14933/f2p0/1827,transcript_HQ_HBZL_transcript7393/f5p0/2237,transcript_HQ_YNMLP_transcript5132/f2p0/2906,transcript_HQ_HBZL_transcript22396/f2p0/1018,transcript_HQ_HBZL_transcript22609/f3p0/978,transcript_HQ_YNLB_transcript17102/f2p0/1366,transcript_HQ_YNMLP_t…
Z_transcript179/f2p0/5118,transcript_HQ_HBZL_transcript8396/f2p0/2230,transcript_HQ_HBZL_transcript6243/f9p0/2448,transcript_HQ_HBZL_transcript12040/f4p0/1900,transcript_HQ_YNMLP_transcript25003/f6p0/690,transcript_HQ_YNLB_transcript8553/f9p0/2356,transcript_HQ_HBZL_transcript1721/f3p0/3365,transcript_HQ_YNMLP_transcript21230/f2p0/1064,transcript_HQ_HBZL_transcript20002/f9p0/1248,transcript_HQ_HB…
9/f2p0/2560,transcript_HQ_YNMLP_transcript1722/f2p0/3697,transcript_HQ_YNLB_transcript7665/f5p0/2385,transcript_HQ_YNLB_transcript7402/f2p0/2430,transcript_HQ_HBZL_transcript5468/f2p0/2526,transcript_HQ_YNLB_transcript9621/f3p0/2175,transcript_HQ_YNLB_transcript13476/f2p0/1818,transcript_HQ_HBZL_transcript18007/f2p0/1450,transcript_HQ_HBZL_transcript14744/f7p0/1706,transcript_HQ_HBZL_transcript17…
GO:0016765	transferase activity, transferring alkyl or aryl (other than methyl) groups	molecular_function	0.14132	1	109	22033	180	39009	transcript_HQ_SCJY_transcript18482/f3p0/930,transcript_HQ_HBZL_transcript7975/f4p0/2221,transcript_HQ_YNMLP_transcript17239/f2p0/1560,transcript_HQ_YNLB_transcript16148/f5p0/1494,transcript_HQ_HBZL_transcript8523/f2p0/2176,transcript_HQ_HBZL_transcript11482/f6p0/1950,transcript_HQ_HBZL_transcript18131/f2p0/1434,transcript_HQ_YNLB_transcript16029/f5p0/1519,transcript_HQ_YNMLP_transcript9819/f2p0/2…
GO:0050789	regulation of biological process	biological_process	0.14146	1	2879	22033	5035	39009	transcript_HQ_HBZL_transcript620/f5p0/4070,transcript_HQ_YNLB_transcript1979/f2p0/3559,transcript_HQ_YNMLP_transcript15780/f3p0/1758,transcript_HQ_YNLB_transcript23748/f2p0/532,transcript_HQ_SCJY_transcript16374/f5p0/1164,transcript_HQ_HBZL_transcript4047/f2p0/2729,transcript_HQ_YNMLP_transcript16895/f2p0/1622,transcript_HQ_YNMLP_transcript8980/f2p0/2469,transcript_HQ_YNLB_transcript14941/f7p0/16…
BZL_transcript841/f3p0/3906,transcript_HQ_YNLB_transcript15942/f2p0/1527,transcript_HQ_SCJY_transcript19406/f2p0/811,transcript_HQ_YNMLP_transcript17394/f3p0/1532,transcript_HQ_HBZL_transcript375/f3p0/4477,transcript_HQ_HBZL_transcript17423/f2p0/1520,transcript_HQ_HBZL_transcript21692/f4p0/1081,transcript_HQ_HBZL_transcript10949/f2p0/2043,transcript_HQ_HBZL_transcript9054/f12p0/2135,transcript_HQ…
23/f4p0/2700,transcript_HQ_HBZL_transcript16132/f2p0/1589,transcript_HQ_YNMLP_transcript6523/f2p0/2745,transcript_HQ_HBZL_transcript1995/f10p0/3286,transcript_HQ_HBZL_transcript15502/f4p0/1623,transcript_HQ_YNLB_transcript8439/f2p0/2298,transcript_HQ_YNMLP_transcript855/f9p0/4177,transcript_HQ_YNMLP_transcript207/f2p0/5567,transcript_HQ_YNLB_transcript5126/f2p0/2725,transcript_HQ_HBZL_transcript5…
339/f4p0/3143,transcript_HQ_HBZL_transcript16063/f3p0/1606,transcript_HQ_HBZL_transcript12861/f2p0/1826,transcript_HQ_YNMLP_transcript884/f3p0/4134,transcript_HQ_HBZL_transcript2114/f2p0/3248,transcript_HQ_YNLB_transcript11729/f3p0/1974,transcript_HQ_YNLB_transcript21253/f3p0/804,transcript_HQ_HBZL_transcript15773/f4p0/1624,transcript_HQ_YNMLP_transcript8161/f10p0/2561,transcript_HQ_SCJY_transcri…
GO:0009378	four-way junction helicase activity	molecular_function	0.14403	1	198	22033	327	39009	transcript_HQ_HBZL_transcript5974/f4p0/2469,transcript_HQ_YNMLP_transcript3413/f2p0/3216,transcript_HQ_YNLB_transcript14207/f9p0/1778,transcript_HQ_HBZL_transcript2144/f2p0/3204,transcript_HQ_YNMLP_transcript8494/f5p0/2542,transcript_HQ_YNMLP_transcript38/f2p0/7071,transcript_HQ_YNMLP_transcript3656/f2p0/3183,transcript_HQ_SCJY_transcript2109/f3p0/2990,transcript_HQ_YNLB_transcript1409/f2p0/3713,…
GO:0044462	external encapsulating structure part	cellular_component	0.14417	1	9	22033	12	39009	transcript_HQ_YNMLP_transcript18698/f8p0/1349,transcript_HQ_HBZL_transcript20179/f3p0/1258,transcript_HQ_YNLB_transcript5047/f3p0/2730,transcript_HQ_SCEZ_transcript18545/f10p0/1329,transcript_HQ_SCJY_transcript15605/f2p0/1261,transcript_HQ_YNLB_transcript20486/f2p0/913,transcript_HQ_YNLB_transcript19765/f2p0/995,transcript_HQ_YNMLP_transcript19200/f2p0/1255,transcript_HQ_YNMLP_transcript23438/f2p…
GO:0031400	negative regulation of protein modification process	biological_process	0.14498	1	18	22033	26	39009	transcript_HQ_YNLB_transcript16022/f3p0/1517,transcript_HQ_SCJY_transcript19801/f2p0/788,transcript_HQ_HBZL_transcript21/f2p0/7062,transcript_HQ_HBZL_transcript3113/f7p0/2949,transcript_HQ_HBZL_transcript21704/f2p0/1070,transcript_HQ_YNLB_transcript17860/f2p0/1225,transcript_HQ_SCJY_transcript10115/f5p0/1922,transcript_HQ_HBZL_transcript7062/f2p0/2323,transcript_HQ_YNMLP_transcript17903/f2p0/1497…
GO:0051348	negative regulation of transferase activity	biological_process	0.14498	1	18	22033	26	39009	transcript_HQ_SCJY_transcript10115/f5p0/1922,transcript_HQ_YNLB_transcript17860/f2p0/1225,transcript_HQ_HBZL_transcript7062/f2p0/2323,transcript_HQ_HBZL_transcript21704/f2p0/1070,transcript_HQ_HBZL_transcript3113/f7p0/2949,transcript_HQ_HBZL_transcript21/f2p0/7062,transcript_HQ_SCJY_transcript19801/f2p0/788,transcript_HQ_YNLB_transcript16022/f3p0/1517,transcript_HQ_SCEZ_transcript19783/f4p0/1209,…
GO:0007264	small GTPase mediated signal transduction	biological_process	0.14529	1	258	22033	439	39009	transcript_HQ_YNLB_transcript19593/f5p0/1012,transcript_HQ_YNMLP_transcript21526/f9p0/1051,transcript_HQ_YNLB_transcript18989/f2p0/1081,transcript_HQ_HBZL_transcript233/f4p0/4916,transcript_HQ_YNMLP_transcript6507/f3p0/2727,transcript_HQ_YNLB_transcript16113/f2p0/1488,transcript_HQ_HBZL_transcript21692/f4p0/1081,transcript_HQ_YNMLP_transcript21283/f4p0/1068,transcript_HQ_SCEZ_transcript6310/f18p0…
GO:0019904	protein domain specific binding	molecular_function	0.14578	1	19	22033	28	39009	transcript_HQ_YNMLP_transcript20970/f10p0/1096,transcript_HQ_SCJY_transcript19206/f2p0/887,transcript_HQ_HBZL_transcript4579/f2p0/2692,transcript_HQ_YNMLP_transcript7120/f2p0/2675,transcript_HQ_HBZL_transcript5251/f4p0/2610,transcript_HQ_HBZL_transcript8539/f5p0/2170,transcript_HQ_YNLB_transcript4476/f3p0/2794,transcript_HQ_YNMLP_transcript11484/f2p0/2225,transcript_HQ_HBZL_transcript21280/f7p0/1…
GO:0033554	cellular response to stress	biological_process	0.14659	1	414	22033	703	39009	transcript_HQ_HBZL_transcript10757/f3p0/2030,transcript_HQ_HBZL_transcript12762/f31p0/1781,transcript_HQ_HBZL_transcript14491/f3p0/1718,transcript_HQ_HBZL_transcript4087/f2p0/2737,transcript_HQ_HBZL_transcript10428/f2p0/2080,transcript_HQ_YNMLP_transcript9562/f31p0/2398,transcript_HQ_YNMLP_transcript9564/f5p0/2405,transcript_HQ_HBZL_transcript243/f2p0/4950,transcript_HQ_YNMLP_transcript3234/f2p0/…
GO:0007165	signal transduction	biological_process	0.14674	1	1025	22033	1776	39009	transcript_HQ_YNMLP_transcript19540/f2p0/1255,transcript_HQ_YNMLP_transcript146/f2p0/5950,transcript_HQ_HBZL_transcript876/f2p0/3846,transcript_HQ_HBZL_transcript12678/f3p0/1841,transcript_HQ_YNLB_transcript8299/f2p0/2343,transcript_HQ_HBZL_transcript3297/f4p0/2890,transcript_HQ_HBZL_transcript12575/f2p0/1841,transcript_HQ_SCJY_transcript6078/f2p0/2365,transcript_HQ_YNLB_transcript15679/f7p0/1587…
nscript20267/f2p0/914,transcript_HQ_YNLB_transcript12900/f2p0/1846,transcript_HQ_YNMLP_transcript16553/f2p0/1646,transcript_HQ_YNLB_transcript19144/f3p0/1058,transcript_HQ_YNMLP_transcript24760/f3p0/711,transcript_HQ_HBZL_transcript4143/f14p0/2714,transcript_HQ_HBZL_transcript2694/f2p0/3035,transcript_HQ_HBZL_transcript5744/f6p0/2499,transcript_HQ_HBZL_transcript12397/f2p0/1861,transcript_HQ_YNML…
GO:0032559	adenyl ribonucleotide binding	molecular_function	0.14693	1	3176	22033	5486	39009	transcript_HQ_HBZL_transcript17294/f4p0/1506,transcript_HQ_SCJY_transcript12416/f2p0/1691,transcript_HQ_YNMLP_transcript2241/f2p0/3538,transcript_HQ_YNLB_transcript2586/f3p0/3232,transcript_HQ_HBZL_transcript1773/f3p0/3337,transcript_HQ_YNLB_transcript10871/f2p0/2104,transcript_HQ_HBZL_transcript897/f5p0/3835,transcript_HQ_HBZL_transcript6216/f7p0/2419,transcript_HQ_HBZL_transcript1599/f2p0/3430,…
1594,transcript_HQ_YNLB_transcript16518/f4p0/1443,transcript_HQ_HBZL_transcript599/f2p0/4135,transcript_HQ_YNMLP_transcript2329/f2p0/3516,transcript_HQ_HBZL_transcript7245/f2p0/2311,transcript_HQ_YNMLP_transcript14135/f2p0/1965,transcript_HQ_SCEZ_transcript8066/f15p0/2168,transcript_HQ_YNLB_transcript9505/f2p0/2206,transcript_HQ_YNLB_transcript11729/f3p0/1974,transcript_HQ_HBZL_transcript1740/f4p…
t1140/f3p0/3620,transcript_HQ_HBZL_transcript8579/f2p0/2187,transcript_HQ_YNLB_transcript11998/f3p0/1970,transcript_HQ_HBZL_transcript1687/f2p0/3375,transcript_HQ_HBZL_transcript10740/f4p0/1995,transcript_HQ_HBZL_transcript7546/f2p0/2254,transcript_HQ_HBZL_transcript18124/f5p0/1435,transcript_HQ_HBZL_transcript7871/f8p0/2231,transcript_HQ_HBZL_transcript1925/f2p0/3331,transcript_HQ_SCJY_transcrip…
_SCJY_transcript3111/f2p0/2784,transcript_HQ_HBZL_transcript1262/f7p0/3535,transcript_HQ_HBZL_transcript11984/f2p0/1880,transcript_HQ_YNMLP_transcript15757/f9p0/1737,transcript_HQ_HBZL_transcript6871/f4p0/2342,transcript_HQ_YNLB_transcript19237/f5p0/1117,transcript_HQ_YNLB_transcript10435/f3p0/2104,transcript_HQ_HBZL_transcript21217/f2p0/1125,transcript_HQ_YNMLP_transcript2022/f2p0/3655,transcrip…
ranscript_HQ_YNMLP_transcript15697/f10p0/1713,transcript_HQ_HBZL_transcript10266/f5p0/2029,transcript_HQ_HBZL_transcript1169/f2p0/3677,transcript_HQ_HBZL_transcript9773/f2p0/2073,transcript_HQ_YNLB_transcript567/f2p0/4362,transcript_HQ_SCEZ_transcript1424/f4p0/3450,transcript_HQ_SCEZ_transcript5799/f9p0/2413,transcript_HQ_SCJY_transcript6185/f3p0/2400,transcript_HQ_YNMLP_transcript14885/f2p0/1847…
GO:0006281	DNA repair	biological_process	0.14778	1	362	22033	610	39009	transcript_HQ_YNMLP_transcript420/f2p0/4779,transcript_HQ_HBZL_transcript17634/f9p0/1481,transcript_HQ_YNMLP_transcript526/f2p0/4518,transcript_HQ_YNLB_transcript13259/f2p0/1814,transcript_HQ_HBZL_transcript30/f3p0/6883,transcript_HQ_YNLB_transcript19682/f9p0/1003,transcript_HQ_SCEZ_transcript11113/f3p0/1911,transcript_HQ_HBZL_transcript26733/f3p0/543,transcript_HQ_HBZL_transcript6739/f3p0/2356,t…
GO:0010466	negative regulation of peptidase activity	biological_process	0.14789	1	3	22033	3	39009	transcript_HQ_HBZL_transcript25716/f17p0/638,transcript_HQ_SCJY_transcript19926/f2p0/777,transcript_HQ_YNLB_transcript22471/f3p0/679
GO:0010951	negative regulation of endopeptidase activity	biological_process	0.14789	1	3	22033	3	39009	transcript_HQ_YNLB_transcript22471/f3p0/679,transcript_HQ_HBZL_transcript25716/f17p0/638,transcript_HQ_SCJY_transcript19926/f2p0/777
GO:0052547	regulation of peptidase activity	biological_process	0.14789	1	3	22033	3	39009	transcript_HQ_YNLB_transcript22471/f3p0/679,transcript_HQ_HBZL_transcript25716/f17p0/638,transcript_HQ_SCJY_transcript19926/f2p0/777
GO:0052548	regulation of endopeptidase activity	biological_process	0.14789	1	3	22033	3	39009	transcript_HQ_YNLB_transcript22471/f3p0/679,transcript_HQ_HBZL_transcript25716/f17p0/638,transcript_HQ_SCJY_transcript19926/f2p0/777
GO:0051321	meiotic cell cycle	biological_process	0.1493	1	19	22033	28	39009	transcript_HQ_HBZL_transcript4579/f2p0/2692,transcript_HQ_HBZL_transcript10243/f2p0/2038,transcript_HQ_SCJY_transcript12623/f5p0/1648,transcript_HQ_YNMLP_transcript18255/f3p0/1406,transcript_HQ_SCJY_transcript15880/f2p0/1230,transcript_HQ_HBZL_transcript10668/f6p0/1987,transcript_HQ_YNMLP_transcript7120/f2p0/2675,transcript_HQ_YNMLP_transcript19385/f16p0/1250,transcript_HQ_YNLB_transcript1993/f3p…
GO:0008483	transaminase activity	molecular_function	0.14941	1	19	22033	28	39009	transcript_HQ_YNLB_transcript12896/f2p0/1848,transcript_HQ_HBZL_transcript12951/f18p0/1815,transcript_HQ_HBZL_transcript14133/f16p0/1720,transcript_HQ_YNLB_transcript11024/f2p0/2049,transcript_HQ_YNLB_transcript16941/f4p0/1393,transcript_HQ_HBZL_transcript16986/f2p0/1542,transcript_HQ_YNMLP_transcript15861/f2p0/1718,transcript_HQ_SCEZ_transcript13299/f3p0/1757,transcript_HQ_HBZL_transcript15084/f…
GO:0016769	transferase activity, transferring nitrogenous groups	molecular_function	0.14941	1	19	22033	28	39009	transcript_HQ_HBZL_transcript14248/f2p0/1694,transcript_HQ_YNMLP_transcript16784/f4p0/1598,transcript_HQ_HBZL_transcript15859/f10p0/1606,transcript_HQ_YNLB_transcript10844/f2p0/2074,transcript_HQ_HBZL_transcript7924/f2p0/2229,transcript_HQ_HBZL_transcript3034/f2p0/2946,transcript_HQ_HBZL_transcript11782/f4p0/1905,transcript_HQ_HBZL_transcript17982/f2p0/1447,transcript_HQ_YNLB_transcript12896/f2p0…
GO:0050794	regulation of cellular process	biological_process	0.15046	1	2785	22033	4871	39009	transcript_HQ_SCEZ_transcript21068/f3p0/1085,transcript_HQ_HBZL_transcript17812/f8p0/1468,transcript_HQ_HBZL_transcript15586/f2p0/1653,transcript_HQ_HBZL_transcript11234/f14p0/1909,transcript_HQ_HBZL_transcript12742/f3p0/1842,transcript_HQ_YNMLP_transcript16809/f2p0/1598,transcript_HQ_HBZL_transcript11453/f2p0/1915,transcript_HQ_HBZL_transcript11054/f2p0/1965,transcript_HQ_YNLB_transcript15551/f9…
HQ_HBZL_transcript10638/f5p0/1996,transcript_HQ_SCEZ_transcript6550/f3p0/2354,transcript_HQ_YNMLP_transcript4630/f2p0/2999,transcript_HQ_YNLB_transcript15293/f3p0/1602,transcript_HQ_HBZL_transcript14790/f2p0/1692,transcript_HQ_HBZL_transcript18295/f6p0/1434,transcript_HQ_HBZL_transcript10702/f3p0/2044,transcript_HQ_HBZL_transcript3635/f2p0/2807,transcript_HQ_YNMLP_transcript10527/f3p0/2306,transc…
cript2737/f10p0/3037,transcript_HQ_YNMLP_transcript16215/f2p0/1685,transcript_HQ_YNLB_transcript9222/f2p0/2232,transcript_HQ_SCJY_transcript6906/f2p0/2272,transcript_HQ_YNMLP_transcript16/f3p0/7799,transcript_HQ_SCEZ_transcript5626/f5p0/2467,transcript_HQ_SCJY_transcript21402/f3p0/654,transcript_HQ_YNMLP_transcript13654/f2p0/1991,transcript_HQ_SCEZ_transcript3531/f2p0/2792,transcript_HQ_YNMLP_tra…
063/f7p0/921,transcript_HQ_SCJY_transcript658/f2p0/3661,transcript_HQ_YNLB_transcript3368/f6p0/3083,transcript_HQ_HBZL_transcript4538/f7p0/2588,transcript_HQ_HBZL_transcript22546/f2p0/995,transcript_HQ_SCJY_transcript12639/f3p0/1658,transcript_HQ_YNMLP_transcript19248/f5p0/1283,transcript_HQ_YNMLP_transcript345/f4p0/5017,transcript_HQ_YNLB_transcript4690/f2p0/2776,transcript_HQ_HBZL_transcript240…
GO:0016667	oxidoreductase activity, acting on a sulfur group of donors	molecular_function	0.1506	1	118	22033	200	39009	transcript_HQ_HBZL_transcript6790/f4p0/2368,transcript_HQ_YNLB_transcript15345/f2p0/1585,transcript_HQ_HBZL_transcript23914/f3p0/796,transcript_HQ_HBZL_transcript12837/f2p0/1857,transcript_HQ_YNMLP_transcript18592/f3p0/1369,transcript_HQ_HBZL_transcript8770/f2p0/2157,transcript_HQ_YNLB_transcript21418/f2p0/791,transcript_HQ_HBZL_transcript22316/f2p0/1010,transcript_HQ_HBZL_transcript14419/f12p0/1…
GO:0016627	oxidoreductase activity, acting on the CH-CH group of donors	molecular_function	0.1512	1	174	22033	292	39009	transcript_HQ_YNLB_transcript3441/f2p0/3036,transcript_HQ_YNLB_transcript9910/f2p0/2172,transcript_HQ_HBZL_transcript17596/f6p0/1480,transcript_HQ_HBZL_transcript14003/f9p0/1763,transcript_HQ_YNMLP_transcript14479/f2p0/1887,transcript_HQ_YNMLP_transcript10876/f2p0/2291,transcript_HQ_SCJY_transcript13557/f4p0/1538,transcript_HQ_YNMLP_transcript18696/f5p0/1366,transcript_HQ_YNMLP_transcript12307/f7…
GO:0042030	ATPase inhibitor activity	molecular_function	0.1513	1	23	22033	35	39009	transcript_HQ_YNMLP_transcript26539/f3p0/552,transcript_HQ_YNMLP_transcript4331/f5p0/3028,transcript_HQ_YNLB_transcript2422/f2p0/3317,transcript_HQ_SCJY_transcript2012/f2p0/3042,transcript_HQ_HBZL_transcript26380/f3p0/611,transcript_HQ_HBZL_transcript18627/f2p0/1382,transcript_HQ_YNMLP_transcript7799/f3p0/2688,transcript_HQ_HBZL_transcript3130/f6p0/2874,transcript_HQ_HBZL_transcript22684/f10p0/96…
GO:0023052	signaling	biological_process	0.15139	1	1028	22033	1782	39009	transcript_HQ_YNMLP_transcript18774/f2p0/1398,transcript_HQ_YNLB_transcript2834/f2p0/3251,transcript_HQ_YNLB_transcript10200/f2p0/2142,transcript_HQ_YNMLP_transcript201/f3p0/5608,transcript_HQ_HBZL_transcript143/f2p0/5499,transcript_HQ_HBZL_transcript8046/f57p0/2185,transcript_HQ_YNMLP_transcript24533/f3p0/721,transcript_HQ_HBZL_transcript25274/f2p0/689,transcript_HQ_YNMLP_transcript2192/f2p0/354…
cript19579/f11p0/1233,transcript_HQ_YNLB_transcript22812/f2p0/640,transcript_HQ_YNLB_transcript306/f2p0/4952,transcript_HQ_HBZL_transcript5306/f16p0/2538,transcript_HQ_YNMLP_transcript21467/f3p0/1067,transcript_HQ_HBZL_transcript406/f2p0/4443,transcript_HQ_HBZL_transcript614/f2p0/4112,transcript_HQ_SCEZ_transcript20501/f2p0/1133,transcript_HQ_HBZL_transcript8377/f3p0/2184,transcript_HQ_SCJY_trans…
GO:0044700	single organism signaling	biological_process	0.15139	1	1028	22033	1782	39009	transcript_HQ_HBZL_transcript5659/f4p0/2499,transcript_HQ_SCJY_transcript4725/f2p0/2571,transcript_HQ_YNLB_transcript7795/f2p0/2414,transcript_HQ_HBZL_transcript20271/f2p0/1209,transcript_HQ_SCJY_transcript8841/f10p0/2127,transcript_HQ_YNLB_transcript11117/f3p0/2032,transcript_HQ_HBZL_transcript205/f3p0/4891,transcript_HQ_SCJY_transcript20988/f4p0/676,transcript_HQ_HBZL_transcript1324/f2p0/3564,t…
cript9703/f7p0/2063,transcript_HQ_SCJY_transcript3322/f2p0/2717,transcript_HQ_HBZL_transcript9963/f3p0/2077,transcript_HQ_SCEZ_transcript6310/f18p0/2348,transcript_HQ_YNLB_transcript15270/f4p0/1596,transcript_HQ_HBZL_transcript16300/f8p0/1600,transcript_HQ_HBZL_transcript8092/f2p0/2217,transcript_HQ_YNMLP_transcript5577/f4p0/2840,transcript_HQ_HBZL_transcript6989/f2p0/2318,transcript_HQ_HBZL_tran…
GO:0019634	organic phosphonate metabolic process	biological_process	0.15158	1	3	22033	3	39009	transcript_HQ_SCJY_transcript18413/f2p0/919,transcript_HQ_YNLB_transcript22952/f12p0/619,transcript_HQ_HBZL_transcript24358/f2p0/774
GO:0008113	peptide-methionine (S)-S-oxide reductase activity	molecular_function	0.1519	1	5	22033	6	39009	transcript_HQ_HBZL_transcript21226/f2p0/1134,transcript_HQ_SCJY_transcript20104/f7p0/779,transcript_HQ_SCEZ_transcript11289/f2p0/1894,transcript_HQ_HBZL_transcript24234/f3p0/787,transcript_HQ_HBZL_transcript27495/f2p0/466
GO:0030203	glycosaminoglycan metabolic process	biological_process	0.15365	1	21	22033	31	39009	transcript_HQ_YNMLP_transcript5916/f6p0/2795,transcript_HQ_YNLB_transcript8220/f2p0/2370,transcript_HQ_HBZL_transcript3996/f7p0/2748,transcript_HQ_YNLB_transcript4313/f3p0/2841,transcript_HQ_YNMLP_transcript19373/f2p0/1285,transcript_HQ_YNMLP_transcript5572/f3p0/2870,transcript_HQ_SCEZ_transcript16124/f4p0/1577,transcript_HQ_HBZL_transcript1938/f3p0/3275,transcript_HQ_HBZL_transcript2944/f2p0/289…
GO:0042578	phosphoric ester hydrolase activity	molecular_function	0.15478	1	267	22033	448	39009	transcript_HQ_YNMLP_transcript16093/f11p0/1667,transcript_HQ_HBZL_transcript13158/f7p0/1774,transcript_HQ_HBZL_transcript2147/f3p0/3220,transcript_HQ_YNMLP_transcript13817/f2p0/1975,transcript_HQ_HBZL_transcript3015/f2p0/2947,transcript_HQ_HBZL_transcript9418/f2p0/2096,transcript_HQ_YNLB_transcript574/f3p0/4391,transcript_HQ_YNLB_transcript9325/f5p0/2230,transcript_HQ_HBZL_transcript20646/f6p0/10…
GO:0045893	positive regulation of transcription, DNA-templated	biological_process	0.15573	1	27	22033	41	39009	transcript_HQ_HBZL_transcript25728/f2p0/647,transcript_HQ_YNMLP_transcript21819/f2p0/996,transcript_HQ_HBZL_transcript5471/f2p0/2514,transcript_HQ_HBZL_transcript461/f2p0/4294,transcript_HQ_HBZL_transcript12163/f3p0/1872,transcript_HQ_HBZL_transcript3502/f2p0/2839,transcript_HQ_HBZL_transcript12569/f2p0/1867,transcript_HQ_YNLB_transcript18109/f2p0/1225,transcript_HQ_HBZL_transcript2042/f3p0/3245,…
GO:1903508	positive regulation of nucleic acid-templated transcription	biological_process	0.15573	1	27	22033	41	39009	transcript_HQ_YNLB_transcript641/f5p0/4263,transcript_HQ_YNMLP_transcript19403/f2p0/1256,transcript_HQ_HBZL_transcript789/f6p0/3894,transcript_HQ_YNLB_transcript11849/f2p0/1964,transcript_HQ_HBZL_transcript20131/f2p0/1241,transcript_HQ_YNMLP_transcript13454/f2p0/2016,transcript_HQ_YNMLP_transcript9942/f10p0/2349,transcript_HQ_HBZL_transcript14058/f2p0/1758,transcript_HQ_HBZL_transcript10221/f2p0/…
GO:0006631	fatty acid metabolic process	biological_process	0.15773	1	175	22033	293	39009	transcript_LQ_HBZL_transcript6752/f2p0/2320,transcript_HQ_YNMLP_transcript1194/f2p0/3932,transcript_HQ_YNLB_transcript11534/f4p0/2026,transcript_HQ_YNMLP_transcript11000/f3p0/2272,transcript_HQ_YNLB_transcript7577/f3p0/2448,transcript_HQ_HBZL_transcript9589/f6p0/2077,transcript_HQ_YNLB_transcript2902/f2p0/3140,transcript_HQ_HBZL_transcript10820/f3p0/1964,transcript_HQ_SCEZ_transcript11034/f5p0/19…
GO:0043248	proteasome assembly	biological_process	0.15782	1	41	22033	64	39009	transcript_HQ_YNMLP_transcript884/f3p0/4134,transcript_HQ_HBZL_transcript2207/f2p0/3195,transcript_HQ_HBZL_transcript26740/f3p0/541,transcript_HQ_HBZL_transcript11415/f4p0/1923,transcript_HQ_HBZL_transcript14364/f4p0/1726,transcript_HQ_HBZL_transcript26771/f5p0/539,transcript_HQ_SCEZ_transcript22643/f6p0/923,transcript_HQ_SCJY_transcript1133/f2p0/3329,transcript_HQ_HBZL_transcript87/f3p0/6033,tra…
GO:0019725	cellular homeostasis	biological_process	0.1581	1	251	22033	432	39009	transcript_HQ_YNLB_transcript15225/f3p0/1610,transcript_HQ_SCJY_transcript7047/f2p0/2390,transcript_HQ_SCJY_transcript17518/f8p0/1024,transcript_HQ_SCEZ_transcript21705/f4p0/1100,transcript_HQ_YNLB_transcript25704/f2p0/259,transcript_HQ_HBZL_transcript20599/f3p0/1192,transcript_HQ_HBZL_transcript12969/f2p0/1830,transcript_HQ_YNLB_transcript14704/f37p0/1632,transcript_HQ_HBZL_transcript16037/f4p0/…
GO:0007049	cell cycle	biological_process	0.15841	1	317	22033	542	39009	transcript_HQ_YNMLP_transcript17564/f2p0/1502,transcript_HQ_HBZL_transcript1145/f3p0/3660,transcript_HQ_HBZL_transcript21002/f2p0/1143,transcript_HQ_HBZL_transcript9832/f3p0/2073,transcript_HQ_YNMLP_transcript24348/f2p0/747,transcript_HQ_YNLB_transcript7271/f6p0/2448,transcript_HQ_HBZL_transcript4579/f2p0/2692,transcript_HQ_YNMLP_transcript19752/f2p0/1239,transcript_HQ_HBZL_transcript22012/f3p0/1…
GO:0008108	UDP-glucose:hexose-1-phosphate uridylyltransferase activity	molecular_function	0.15846	1	7	22033	9	39009	transcript_HQ_SCJY_transcript8377/f2p0/2139,transcript_HQ_YNLB_transcript4091/f2p0/2897,transcript_HQ_YNLB_transcript18405/f2p0/1159,transcript_HQ_HBZL_transcript21450/f10p0/1104,transcript_HQ_HBZL_transcript21131/f3p0/1132,transcript_HQ_SCJY_transcript18128/f2p0/945,transcript_HQ_YNLB_transcript17959/f3p0/1247
GO:0010277	chlorophyllide a oxygenase [overall] activity	molecular_function	0.15857	1	9	22033	12	39009	transcript_HQ_SCJY_transcript10646/f2p0/1888,transcript_HQ_YNLB_transcript10641/f18p0/1862,transcript_HQ_HBZL_transcript12610/f9p0/1844,transcript_HQ_YNMLP_transcript6773/f2p0/2734,transcript_HQ_HBZL_transcript12349/f3p0/1859,transcript_HQ_HBZL_transcript5501/f2p0/2507,transcript_HQ_HBZL_transcript11518/f15p0/1906,transcript_HQ_YNLB_transcript11537/f2p0/2005,transcript_HQ_YNMLP_transcript14809/f3…
GO:0065007	biological regulation	biological_process	0.15915	1	2972	22033	5204	39009	transcript_HQ_SCJY_transcript7888/f3p0/2161,transcript_HQ_HBZL_transcript4972/f5p0/2614,transcript_HQ_YNLB_transcript7176/f3p0/2465,transcript_HQ_YNMLP_transcript16211/f3p0/1676,transcript_HQ_HBZL_transcript11085/f12p0/1952,transcript_HQ_HBZL_transcript2652/f9p0/3063,transcript_HQ_YNLB_transcript4036/f3p0/2924,transcript_HQ_HBZL_transcript22923/f6p0/931,transcript_HQ_HBZL_transcript9122/f3p0/2113…
2720,transcript_HQ_HBZL_transcript18994/f4p0/1365,transcript_HQ_SCJY_transcript79/f2p0/4859,transcript_HQ_YNMLP_transcript15617/f2p0/1735,transcript_HQ_HBZL_transcript13022/f24p0/1807,transcript_HQ_HBZL_transcript22498/f2p0/978,transcript_HQ_YNLB_transcript8058/f2p0/2369,transcript_HQ_SCJY_transcript12719/f2p0/1645,transcript_HQ_YNLB_transcript15372/f2p0/1594,transcript_HQ_YNMLP_transcript21388/f…
ranscript4538/f7p0/2588,transcript_HQ_SCJY_transcript12639/f3p0/1658,transcript_HQ_HBZL_transcript4734/f2p0/2594,transcript_HQ_HBZL_transcript21038/f2p0/1162,transcript_HQ_SCJY_transcript658/f2p0/3661,transcript_HQ_YNLB_transcript3368/f6p0/3083,transcript_HQ_HBZL_transcript16936/f3p0/1547,transcript_HQ_YNLB_transcript14834/f3p0/1672,transcript_HQ_HBZL_transcript23063/f7p0/921,transcript_HQ_YNLB_t…
/f4p0/2656,transcript_HQ_YNLB_transcript15866/f2p0/1525,transcript_HQ_YNMLP_transcript21829/f2p0/1003,transcript_HQ_YNLB_transcript7980/f3p0/2377,transcript_HQ_YNLB_transcript20385/f12p0/834,transcript_HQ_YNLB_transcript55/f2p0/6645,transcript_HQ_YNLB_transcript14591/f3p0/1712,transcript_HQ_HBZL_transcript2120/f2p0/3252,transcript_HQ_YNMLP_transcript7075/f2p0/2680,transcript_HQ_HBZL_transcript133…
_HBZL_transcript14193/f6p0/1736,transcript_HQ_YNLB_transcript19025/f2p0/1142,transcript_HQ_YNMLP_transcript16282/f2p0/1673,transcript_HQ_HBZL_transcript6836/f10p0/2350,transcript_HQ_YNMLP_transcript18940/f2p0/1330,transcript_HQ_HBZL_transcript9601/f2p0/2024,transcript_HQ_HBZL_transcript11665/f4p0/1910,transcript_HQ_YNMLP_transcript11266/f3p0/2266,transcript_HQ_HBZL_transcript20205/f8p0/1263,trans…
GO:0000070	mitotic sister chromatid segregation	biological_process	0.16001	1	28	22033	43	39009	transcript_HQ_YNMLP_transcript17903/f2p0/1497,transcript_HQ_YNLB_transcript11904/f9p0/1952,transcript_HQ_HBZL_transcript1400/f2p0/3502,transcript_HQ_YNMLP_transcript18728/f2p0/1363,transcript_HQ_SCEZ_transcript15437/f2p0/1621,transcript_HQ_YNLB_transcript18947/f2p0/1046,transcript_HQ_YNMLP_transcript1108/f2p0/4014,transcript_HQ_SCEZ_transcript6017/f9p0/2400,transcript_HQ_YNLB_transcript48/f2p0/69…
GO:0000819	sister chromatid segregation	biological_process	0.16001	1	28	22033	43	39009	transcript_HQ_SCEZ_transcript19783/f4p0/1209,transcript_HQ_HBZL_transcript30/f3p0/6883,transcript_HQ_HBZL_transcript5855/f2p0/2521,transcript_HQ_YNLB_transcript18947/f2p0/1046,transcript_HQ_SCEZ_transcript6017/f9p0/2400,transcript_HQ_YNMLP_transcript1108/f2p0/4014,transcript_HQ_YNLB_transcript48/f2p0/6942,transcript_HQ_YNMLP_transcript526/f2p0/4518,transcript_HQ_YNLB_transcript11904/f9p0/1952,tra…
GO:0015925	galactosidase activity	molecular_function	0.16006	1	29	22033	44	39009	transcript_HQ_YNLB_transcript1644/f2p0/3605,transcript_HQ_YNMLP_transcript3869/f3p0/3109,transcript_HQ_HBZL_transcript2680/f8p0/3032,transcript_HQ_HBZL_transcript2362/f2p0/3133,transcript_HQ_YNMLP_transcript7617/f2p0/2621,transcript_HQ_YNMLP_transcript17679/f3p0/1553,transcript_HQ_HBZL_transcript16594/f2p0/1579,transcript_HQ_HBZL_transcript4290/f2p0/2692,transcript_HQ_HBZL_transcript2008/f12p0/31…
GO:0008198	ferrous iron binding	molecular_function	0.16094	1	7	22033	9	39009	transcript_HQ_HBZL_transcript10139/f2p0/2056,transcript_HQ_HBZL_transcript9421/f2p0/2100,transcript_HQ_HBZL_transcript8476/f5p0/2197,transcript_HQ_YNLB_transcript18068/f2p0/1210,transcript_HQ_YNLB_transcript18473/f3p0/1145,transcript_HQ_YNMLP_transcript20594/f5p0/1215,transcript_HQ_YNLB_transcript18320/f4p0/1179
GO:0004536	deoxyribonuclease activity	molecular_function	0.16099	1	79	22033	130	39009	transcript_HQ_YNLB_transcript14432/f5p0/1702,transcript_HQ_HBZL_transcript11077/f3p0/1875,transcript_HQ_HBZL_transcript13230/f2p0/1807,transcript_HQ_YNMLP_transcript20954/f3p0/1086,transcript_HQ_YNLB_transcript14946/f5p0/1636,transcript_HQ_SCJY_transcript13693/f2p0/1532,transcript_HQ_HBZL_transcript20859/f6p0/1169,transcript_HQ_HBZL_transcript12169/f2p0/1876,transcript_HQ_HBZL_transcript1623/f2p0…
GO:0006974	cellular response to DNA damage stimulus	biological_process	0.16133	1	384	22033	651	39009	transcript_HQ_HBZL_transcript101/f2p0/5894,transcript_HQ_YNMLP_transcript5242/f2p0/2885,transcript_HQ_YNLB_transcript450/f3p0/4631,transcript_HQ_HBZL_transcript11033/f14p0/1949,transcript_HQ_SCJY_transcript3966/f2p0/2613,transcript_HQ_YNMLP_transcript17394/f3p0/1532,transcript_HQ_YNMLP_transcript17038/f2p0/1693,transcript_HQ_SCJY_transcript19406/f2p0/811,transcript_HQ_YNLB_transcript402/f2p0/4736…
GO:0016791	phosphatase activity	molecular_function	0.16215	1	219	22033	366	39009	transcript_HQ_YNLB_transcript16158/f9p0/1445,transcript_HQ_HBZL_transcript21629/f2p0/1086,transcript_HQ_SCJY_transcript9954/f3p0/1972,transcript_HQ_SCEZ_transcript21537/f6p0/1015,transcript_HQ_SCJY_transcript4749/f2p0/2580,transcript_HQ_YNLB_transcript2223/f2p0/3364,transcript_HQ_SCJY_transcript17064/f2p0/1071,transcript_HQ_HBZL_transcript1202/f9p0/3672,transcript_HQ_HBZL_transcript1888/f2p0/3323…
GO:0051235	maintenance of location	biological_process	0.16262	1	28	22033	43	39009	transcript_HQ_YNLB_transcript9733/f2p0/2183,transcript_HQ_HBZL_transcript7795/f9p0/2239,transcript_HQ_HBZL_transcript5265/f2p0/2544,transcript_HQ_YNLB_transcript16597/f3p0/1427,transcript_HQ_HBZL_transcript20820/f2p0/1167,transcript_HQ_HBZL_transcript22170/f3p0/1070,transcript_HQ_HBZL_transcript21046/f6p0/1142,transcript_HQ_YNLB_transcript19166/f3p0/1084,transcript_HQ_YNMLP_transcript264/f2p0/524…
GO:0016818	hydrolase activity, acting on acid anhydrides, in phosphorus-containing anhydrides	molecular_function	0.16263	1	1118	22033	1919	39009	transcript_HQ_HBZL_transcript8920/f2p0/2141,transcript_HQ_HBZL_transcript17003/f2p0/1553,transcript_HQ_YNLB_transcript16956/f2p0/1379,transcript_HQ_HBZL_transcript6243/f9p0/2448,transcript_HQ_HBZL_transcript7991/f2p0/2227,transcript_HQ_HBZL_transcript1721/f3p0/3365,transcript_HQ_YNMLP_transcript1961/f2p0/3683,transcript_HQ_SCJY_transcript7803/f8p0/2174,transcript_HQ_HBZL_transcript21233/f8p0/1103…
pt_HQ_HBZL_transcript15045/f8p0/1700,transcript_HQ_HBZL_transcript9073/f14p0/2137,transcript_HQ_HBZL_transcript20945/f2p0/1153,transcript_HQ_HBZL_transcript2317/f36p0/3148,transcript_HQ_HBZL_transcript23154/f5p0/923,transcript_HQ_YNMLP_transcript4093/f5p0/3105,transcript_HQ_SCEZ_transcript7127/f8p0/2315,transcript_HQ_HBZL_transcript9124/f2p0/2172,transcript_HQ_YNLB_transcript3593/f3p0/2979,transc…
GO:0000289	nuclear-transcribed mRNA poly(A) tail shortening	biological_process	0.16273	1	15	22033	22	39009	transcript_HQ_YNLB_transcript18791/f2p0/1106,transcript_HQ_YNMLP_transcript19736/f10p0/1240,transcript_HQ_HBZL_transcript27495/f2p0/466,transcript_HQ_HBZL_transcript20631/f48p0/1156,transcript_HQ_YNLB_transcript17080/f3p0/1342,transcript_HQ_HBZL_transcript24234/f3p0/787,transcript_HQ_HBZL_transcript20481/f2p0/1174,transcript_HQ_HBZL_transcript19976/f5p0/1249,transcript_HQ_SCJY_transcript17012/f2p…
GO:0042592	homeostatic process	biological_process	0.16422	1	278	22033	479	39009	transcript_HQ_YNLB_transcript21733/f2p0/753,transcript_HQ_HBZL_transcript14058/f2p0/1758,transcript_HQ_HBZL_transcript8226/f4p0/2202,transcript_HQ_YNLB_transcript20209/f2p0/936,transcript_HQ_HBZL_transcript12538/f4p0/1851,transcript_HQ_SCJY_transcript22360/f2p0/538,transcript_HQ_YNMLP_transcript22720/f6p0/904,transcript_HQ_YNMLP_transcript21230/f2p0/1064,transcript_HQ_HBZL_transcript2652/f9p0/306…
GO:0006063	uronic acid metabolic process	biological_process	0.16434	1	3	22033	3	39009	transcript_HQ_HBZL_transcript6888/f4p0/2338,transcript_HQ_HBZL_transcript23318/f2p0/895,transcript_HQ_SCJY_transcript19606/f2p0/800
GO:0006064	glucuronate catabolic process	biological_process	0.16434	1	3	22033	3	39009	transcript_HQ_HBZL_transcript23318/f2p0/895,transcript_HQ_SCJY_transcript19606/f2p0/800,transcript_HQ_HBZL_transcript6888/f4p0/2338
GO:0008880	glucuronate isomerase activity	molecular_function	0.16434	1	3	22033	3	39009	transcript_HQ_HBZL_transcript6888/f4p0/2338,transcript_HQ_HBZL_transcript23318/f2p0/895,transcript_HQ_SCJY_transcript19606/f2p0/800
GO:0019585	glucuronate metabolic process	biological_process	0.16434	1	3	22033	3	39009	transcript_HQ_HBZL_transcript6888/f4p0/2338,transcript_HQ_SCJY_transcript19606/f2p0/800,transcript_HQ_HBZL_transcript23318/f2p0/895
GO:0009306	protein secretion	biological_process	0.16478	1	34	22033	53	39009	transcript_HQ_SCEZ_transcript578/f2p0/4086,transcript_HQ_YNLB_transcript2112/f2p0/3394,transcript_HQ_SCJY_transcript10397/f3p0/1914,transcript_HQ_SCEZ_transcript18621/f2p0/1334,transcript_HQ_YNMLP_transcript4349/f5p0/3040,transcript_HQ_YNLB_transcript4394/f5p0/2829,transcript_HQ_HBZL_transcript4234/f3p0/2705,transcript_HQ_HBZL_transcript11113/f22p0/1903,transcript_HQ_HBZL_transcript21570/f3p0/110…
GO:0047429	nucleoside-triphosphate diphosphatase activity	molecular_function	0.16561	1	5	22033	6	39009	transcript_HQ_YNLB_transcript21915/f2p0/739,transcript_HQ_HBZL_transcript6700/f3p0/2364,transcript_HQ_YNMLP_transcript11087/f2p0/2277,transcript_HQ_HBZL_transcript5779/f13p0/2454,transcript_HQ_YNMLP_transcript9648/f5p0/2407
GO:0040008	regulation of growth	biological_process	0.16654	1	14	22033	20	39009	transcript_HQ_HBZL_transcript2677/f2p0/3059,transcript_HQ_HBZL_transcript7890/f4p0/2252,transcript_HQ_HBZL_transcript5096/f3p0/2562,transcript_HQ_HBZL_transcript6770/f4p0/2361,transcript_HQ_HBZL_transcript6940/f6p0/2335,transcript_HQ_YNMLP_transcript8826/f2p0/2485,transcript_HQ_YNLB_transcript8439/f2p0/2298,transcript_HQ_YNLB_transcript12900/f2p0/1846,transcript_HQ_YNMLP_transcript10638/f3p0/2299…
GO:0016887	ATPase activity	molecular_function	0.16655	1	606	22033	1027	39009	transcript_HQ_HBZL_transcript244/f2p0/4922,transcript_HQ_YNMLP_transcript855/f9p0/4177,transcript_HQ_HBZL_transcript2044/f2p0/3254,transcript_HQ_YNMLP_transcript629/f4p0/4410,transcript_HQ_YNMLP_transcript12372/f2p0/2124,transcript_HQ_YNMLP_transcript19736/f10p0/1240,transcript_HQ_YNMLP_transcript8344/f4p0/2567,transcript_HQ_SCEZ_transcript14382/f18p0/1680,transcript_HQ_SCEZ_transcript305/f6p0/45…
GO:0046834	lipid phosphorylation	biological_process	0.16684	1	7	22033	9	39009	transcript_HQ_HBZL_transcript20851/f9p0/1160,transcript_LQ_SCJY_transcript14898/f2p0/1354,transcript_HQ_HBZL_transcript8428/f2p0/2171,transcript_HQ_YNLB_transcript16933/f5p0/1376,transcript_HQ_HBZL_transcript18817/f3p0/1379,transcript_HQ_YNLB_transcript18435/f3p0/1147,transcript_HQ_SCJY_transcript804/f2p0/3531
GO:0046854	phosphatidylinositol phosphorylation	biological_process	0.16684	1	7	22033	9	39009	transcript_HQ_YNLB_transcript18435/f3p0/1147,transcript_HQ_SCJY_transcript804/f2p0/3531,transcript_HQ_HBZL_transcript18817/f3p0/1379,transcript_HQ_YNLB_transcript16933/f5p0/1376,transcript_LQ_SCJY_transcript14898/f2p0/1354,transcript_HQ_HBZL_transcript8428/f2p0/2171,transcript_HQ_HBZL_transcript20851/f9p0/1160
GO:0016593	Cdc73/Paf1 complex	cellular_component	0.16697	1	14	22033	20	39009	transcript_HQ_HBZL_transcript3336/f2p0/2877,transcript_HQ_HBZL_transcript9756/f3p0/2065,transcript_HQ_SCEZ_transcript8738/f4p0/2120,transcript_HQ_YNMLP_transcript5659/f3p0/2834,transcript_HQ_HBZL_transcript3678/f11p0/2804,transcript_HQ_HBZL_transcript14058/f2p0/1758,transcript_HQ_HBZL_transcript9526/f2p0/2083,transcript_HQ_YNMLP_transcript5270/f2p0/2894,transcript_HQ_YNMLP_transcript11990/f7p0/21…
GO:0006783	heme biosynthetic process	biological_process	0.16705	1	68	22033	110	39009	transcript_HQ_YNLB_transcript28/f2p0/7405,transcript_HQ_HBZL_transcript3999/f2p0/2729,transcript_HQ_HBZL_transcript18062/f11p0/1451,transcript_HQ_YNLB_transcript11764/f7p0/1977,transcript_HQ_SCJY_transcript11206/f6p0/1799,transcript_HQ_HBZL_transcript17123/f13p0/1489,transcript_HQ_HBZL_transcript7624/f2p0/2272,transcript_HQ_YNMLP_transcript4865/f2p0/3019,transcript_HQ_HBZL_transcript20466/f2p0/12…
GO:0016624	oxidoreductase activity, acting on the aldehyde or oxo group of donors, disulfide as acceptor	molecular_function	0.16796	1	35	22033	54	39009	transcript_HQ_SCEZ_transcript1097/f12p0/3643,transcript_HQ_YNMLP_transcript6251/f2p0/2771,transcript_HQ_HBZL_transcript504/f4p0/4236,transcript_HQ_HBZL_transcript1298/f2p0/3586,transcript_HQ_SCEZ_transcript5341/f2p0/2503,transcript_HQ_SCJY_transcript11306/f3p0/1834,transcript_HQ_YNMLP_transcript2011/f5p0/3625,transcript_HQ_HBZL_transcript4639/f5p0/2630,transcript_HQ_YNLB_transcript14584/f3p0/1692…
GO:0007091	metaphase/anaphase transition of mitotic cell cycle	biological_process	0.16801	1	22	22033	33	39009	transcript_HQ_HBZL_transcript7062/f2p0/2323,transcript_HQ_YNLB_transcript17860/f2p0/1225,transcript_HQ_SCJY_transcript10115/f5p0/1922,transcript_HQ_HBZL_transcript21704/f2p0/1070,transcript_HQ_HBZL_transcript21/f2p0/7062,transcript_HQ_YNLB_transcript9600/f4p0/2205,transcript_HQ_SCJY_transcript19801/f2p0/788,transcript_HQ_YNLB_transcript16022/f3p0/1517,transcript_HQ_HBZL_transcript27398/f4p0/493,t…
GO:0010965	regulation of mitotic sister chromatid separation	biological_process	0.16801	1	22	22033	33	39009	transcript_HQ_YNMLP_transcript17903/f2p0/1497,transcript_HQ_HBZL_transcript1400/f2p0/3502,transcript_HQ_YNMLP_transcript18728/f2p0/1363,transcript_HQ_SCEZ_transcript15437/f2p0/1621,transcript_HQ_YNLB_transcript18947/f2p0/1046,transcript_HQ_YNMLP_transcript1108/f2p0/4014,transcript_HQ_YNLB_transcript48/f2p0/6942,transcript_HQ_YNMLP_transcript526/f2p0/4518,transcript_HQ_SCEZ_transcript19783/f4p0/12…
GO:0030071	regulation of mitotic metaphase/anaphase transition	biological_process	0.16801	1	22	22033	33	39009	transcript_HQ_SCJY_transcript10115/f5p0/1922,transcript_HQ_YNLB_transcript17860/f2p0/1225,transcript_HQ_HBZL_transcript7062/f2p0/2323,transcript_HQ_HBZL_transcript21704/f2p0/1070,transcript_HQ_HBZL_transcript3113/f7p0/2949,transcript_HQ_HBZL_transcript2408/f2p0/3157,transcript_HQ_YNLB_transcript16022/f3p0/1517,transcript_HQ_HBZL_transcript27398/f4p0/493,transcript_HQ_HBZL_transcript21/f2p0/7062,t…
GO:0031145	anaphase-promoting complex-dependent proteasomal ubiquitin-dependent protein catabolic process	biological_process	0.16801	1	22	22033	33	39009	transcript_HQ_HBZL_transcript27398/f4p0/493,transcript_HQ_YNLB_transcript16022/f3p0/1517,transcript_HQ_YNLB_transcript9600/f4p0/2205,transcript_HQ_SCJY_transcript19801/f2p0/788,transcript_HQ_HBZL_transcript21/f2p0/7062,transcript_HQ_HBZL_transcript3113/f7p0/2949,transcript_HQ_HBZL_transcript2408/f2p0/3157,transcript_HQ_HBZL_transcript21704/f2p0/1070,transcript_HQ_HBZL_transcript7062/f2p0/2323,tra…
GO:0032434	regulation of proteasomal ubiquitin-dependent protein catabolic process	biological_process	0.16801	1	22	22033	33	39009	transcript_HQ_HBZL_transcript3113/f7p0/2949,transcript_HQ_HBZL_transcript2408/f2p0/3157,transcript_HQ_YNLB_transcript16022/f3p0/1517,transcript_HQ_HBZL_transcript27398/f4p0/493,transcript_HQ_HBZL_transcript21/f2p0/7062,transcript_HQ_SCJY_transcript19801/f2p0/788,transcript_HQ_YNLB_transcript9600/f4p0/2205,transcript_HQ_YNLB_transcript17860/f2p0/1225,transcript_HQ_SCJY_transcript10115/f5p0/1922,tr…
GO:0033044	regulation of chromosome organization	biological_process	0.16801	1	22	22033	33	39009	transcript_HQ_YNMLP_transcript526/f2p0/4518,transcript_HQ_YNLB_transcript48/f2p0/6942,transcript_HQ_YNLB_transcript18947/f2p0/1046,transcript_HQ_YNMLP_transcript1108/f2p0/4014,transcript_HQ_HBZL_transcript30/f3p0/6883,transcript_HQ_SCEZ_transcript19783/f4p0/1209,transcript_HQ_HBZL_transcript5855/f2p0/2521,transcript_HQ_YNMLP_transcript17903/f2p0/1497,transcript_HQ_YNMLP_transcript18728/f2p0/1363,…
GO:0033045	regulation of sister chromatid segregation	biological_process	0.16801	1	22	22033	33	39009	transcript_HQ_YNMLP_transcript17903/f2p0/1497,transcript_HQ_YNMLP_transcript18728/f2p0/1363,transcript_HQ_SCEZ_transcript15437/f2p0/1621,transcript_HQ_HBZL_transcript1400/f2p0/3502,transcript_HQ_YNLB_transcript48/f2p0/6942,transcript_HQ_YNMLP_transcript526/f2p0/4518,transcript_HQ_YNLB_transcript18947/f2p0/1046,transcript_HQ_YNMLP_transcript1108/f2p0/4014,transcript_HQ_HBZL_transcript30/f3p0/6883,…
GO:0033047	regulation of mitotic sister chromatid segregation	biological_process	0.16801	1	22	22033	33	39009	transcript_HQ_SCEZ_transcript15437/f2p0/1621,transcript_HQ_YNMLP_transcript18728/f2p0/1363,transcript_HQ_HBZL_transcript1400/f2p0/3502,transcript_HQ_YNMLP_transcript17903/f2p0/1497,transcript_HQ_HBZL_transcript5855/f2p0/2521,transcript_HQ_SCEZ_transcript19783/f4p0/1209,transcript_HQ_HBZL_transcript30/f3p0/6883,transcript_HQ_YNLB_transcript48/f2p0/6942,transcript_HQ_YNMLP_transcript526/f2p0/4518,t…
GO:0044784	metaphase/anaphase transition of cell cycle	biological_process	0.16801	1	22	22033	33	39009	transcript_HQ_YNMLP_transcript1108/f2p0/4014,transcript_HQ_YNLB_transcript18947/f2p0/1046,transcript_HQ_YNMLP_transcript526/f2p0/4518,transcript_HQ_YNLB_transcript48/f2p0/6942,transcript_HQ_HBZL_transcript5855/f2p0/2521,transcript_HQ_SCEZ_transcript19783/f4p0/1209,transcript_HQ_HBZL_transcript30/f3p0/6883,transcript_HQ_YNMLP_transcript17903/f2p0/1497,transcript_HQ_HBZL_transcript1400/f2p0/3502,tr…
GO:0051304	chromosome separation	biological_process	0.16801	1	22	22033	33	39009	transcript_HQ_HBZL_transcript3113/f7p0/2949,transcript_HQ_HBZL_transcript2408/f2p0/3157,transcript_HQ_HBZL_transcript21/f2p0/7062,transcript_HQ_SCJY_transcript19801/f2p0/788,transcript_HQ_YNLB_transcript9600/f4p0/2205,transcript_HQ_YNLB_transcript16022/f3p0/1517,transcript_HQ_HBZL_transcript27398/f4p0/493,transcript_HQ_HBZL_transcript7062/f2p0/2323,transcript_HQ_YNLB_transcript17860/f2p0/1225,tra…
GO:0051306	mitotic sister chromatid separation	biological_process	0.16801	1	22	22033	33	39009	transcript_HQ_YNLB_transcript17860/f2p0/1225,transcript_HQ_SCJY_transcript10115/f5p0/1922,transcript_HQ_HBZL_transcript7062/f2p0/2323,transcript_HQ_HBZL_transcript21704/f2p0/1070,transcript_HQ_HBZL_transcript3113/f7p0/2949,transcript_HQ_HBZL_transcript2408/f2p0/3157,transcript_HQ_YNLB_transcript16022/f3p0/1517,transcript_HQ_HBZL_transcript27398/f4p0/493,transcript_HQ_HBZL_transcript21/f2p0/7062,t…
GO:0051983	regulation of chromosome segregation	biological_process	0.16801	1	22	22033	33	39009	transcript_HQ_HBZL_transcript5855/f2p0/2521,transcript_HQ_SCEZ_transcript19783/f4p0/1209,transcript_HQ_HBZL_transcript30/f3p0/6883,transcript_HQ_YNMLP_transcript1108/f2p0/4014,transcript_HQ_YNLB_transcript18947/f2p0/1046,transcript_HQ_YNLB_transcript48/f2p0/6942,transcript_HQ_YNMLP_transcript526/f2p0/4518,transcript_HQ_HBZL_transcript1400/f2p0/3502,transcript_HQ_SCEZ_transcript15437/f2p0/1621,tra…
GO:0061136	regulation of proteasomal protein catabolic process	biological_process	0.16801	1	22	22033	33	39009	transcript_HQ_SCEZ_transcript15437/f2p0/1621,transcript_HQ_YNMLP_transcript18728/f2p0/1363,transcript_HQ_HBZL_transcript1400/f2p0/3502,transcript_HQ_YNMLP_transcript17903/f2p0/1497,transcript_HQ_HBZL_transcript5855/f2p0/2521,transcript_HQ_HBZL_transcript30/f3p0/6883,transcript_HQ_SCEZ_transcript19783/f4p0/1209,transcript_HQ_YNLB_transcript48/f2p0/6942,transcript_HQ_YNMLP_transcript526/f2p0/4518,t…
GO:1902099	regulation of metaphase/anaphase transition of cell cycle	biological_process	0.16801	1	22	22033	33	39009	transcript_HQ_YNMLP_transcript526/f2p0/4518,transcript_HQ_YNLB_transcript48/f2p0/6942,transcript_HQ_YNMLP_transcript1108/f2p0/4014,transcript_HQ_YNLB_transcript18947/f2p0/1046,transcript_HQ_HBZL_transcript5855/f2p0/2521,transcript_HQ_SCEZ_transcript19783/f4p0/1209,transcript_HQ_HBZL_transcript30/f3p0/6883,transcript_HQ_YNMLP_transcript17903/f2p0/1497,transcript_HQ_SCEZ_transcript15437/f2p0/1621,t…
GO:1903050	regulation of proteolysis involved in cellular protein catabolic process	biological_process	0.16801	1	22	22033	33	39009	transcript_HQ_YNLB_transcript16022/f3p0/1517,transcript_HQ_HBZL_transcript27398/f4p0/493,transcript_HQ_HBZL_transcript21/f2p0/7062,transcript_HQ_YNLB_transcript9600/f4p0/2205,transcript_HQ_SCJY_transcript19801/f2p0/788,transcript_HQ_HBZL_transcript3113/f7p0/2949,transcript_HQ_HBZL_transcript2408/f2p0/3157,transcript_HQ_HBZL_transcript7062/f2p0/2323,transcript_HQ_YNLB_transcript17860/f2p0/1225,tra…
GO:1903362	regulation of cellular protein catabolic process	biological_process	0.16801	1	22	22033	33	39009	transcript_HQ_HBZL_transcript1400/f2p0/3502,transcript_HQ_SCEZ_transcript15437/f2p0/1621,transcript_HQ_YNMLP_transcript18728/f2p0/1363,transcript_HQ_YNMLP_transcript17903/f2p0/1497,transcript_HQ_HBZL_transcript5855/f2p0/2521,transcript_HQ_SCEZ_transcript19783/f4p0/1209,transcript_HQ_HBZL_transcript30/f3p0/6883,transcript_HQ_YNMLP_transcript1108/f2p0/4014,transcript_HQ_YNLB_transcript18947/f2p0/10…
GO:0010109	regulation of photosynthesis	biological_process	0.16937	1	3	22033	3	39009	transcript_HQ_HBZL_transcript20789/f17p0/1175,transcript_HQ_SCJY_transcript16374/f5p0/1164,transcript_HQ_SCJY_transcript16405/f9p0/1173
GO:0042548	regulation of photosynthesis, light reaction	biological_process	0.16937	1	3	22033	3	39009	transcript_HQ_HBZL_transcript20789/f17p0/1175,transcript_HQ_SCJY_transcript16374/f5p0/1164,transcript_HQ_SCJY_transcript16405/f9p0/1173
GO:0042549	photosystem II stabilization	biological_process	0.16937	1	3	22033	3	39009	transcript_HQ_HBZL_transcript20789/f17p0/1175,transcript_HQ_SCJY_transcript16405/f9p0/1173,transcript_HQ_SCJY_transcript16374/f5p0/1164
GO:0043467	regulation of generation of precursor metabolites and energy	biological_process	0.16937	1	3	22033	3	39009	transcript_HQ_SCJY_transcript16405/f9p0/1173,transcript_HQ_SCJY_transcript16374/f5p0/1164,transcript_HQ_HBZL_transcript20789/f17p0/1175
GO:0045935	positive regulation of nucleobase-containing compound metabolic process	biological_process	0.1701	1	28	22033	43	39009	transcript_HQ_YNLB_transcript17255/f2p0/1318,transcript_HQ_HBZL_transcript16738/f2p0/1555,transcript_HQ_HBZL_transcript8889/f2p0/2139,transcript_HQ_HBZL_transcript2274/f6p0/3183,transcript_HQ_YNMLP_transcript9942/f10p0/2349,transcript_HQ_HBZL_transcript20131/f2p0/1241,transcript_HQ_YNMLP_transcript13454/f2p0/2016,transcript_HQ_SCJY_transcript669/f2p0/3649,transcript_HQ_HBZL_transcript9005/f2p0/21…
GO:0051254	positive regulation of RNA metabolic process	biological_process	0.1701	1	28	22033	43	39009	transcript_HQ_YNLB_transcript17255/f2p0/1318,transcript_HQ_HBZL_transcript2274/f6p0/3183,transcript_HQ_HBZL_transcript16738/f2p0/1555,transcript_HQ_HBZL_transcript8889/f2p0/2139,transcript_HQ_YNLB_transcript11849/f2p0/1964,transcript_HQ_HBZL_transcript789/f6p0/3894,transcript_HQ_YNMLP_transcript19403/f2p0/1256,transcript_HQ_YNLB_transcript641/f5p0/4263,transcript_HQ_HBZL_transcript9005/f2p0/2142,…
GO:1902680	positive regulation of RNA biosynthetic process	biological_process	0.1701	1	28	22033	43	39009	transcript_HQ_YNLB_transcript18109/f2p0/1225,transcript_HQ_HBZL_transcript2042/f3p0/3245,transcript_HQ_HBZL_transcript12569/f2p0/1867,transcript_HQ_HBZL_transcript3502/f2p0/2839,transcript_HQ_HBZL_transcript12163/f3p0/1872,transcript_HQ_HBZL_transcript17167/f9p0/1513,transcript_HQ_YNLB_transcript18657/f2p0/1122,transcript_HQ_HBZL_transcript19066/f3p0/1374,transcript_HQ_HBZL_transcript3699/f4p0/28…
GO:0000280	nuclear division	biological_process	0.17108	1	59	22033	96	39009	transcript_HQ_YNLB_transcript48/f2p0/6942,transcript_HQ_YNLB_transcript18947/f2p0/1046,transcript_HQ_YNMLP_transcript6061/f2p0/2845,transcript_HQ_SCEZ_transcript6017/f9p0/2400,transcript_HQ_SCEZ_transcript19783/f4p0/1209,transcript_HQ_YNMLP_transcript18176/f2p0/1423,transcript_HQ_YNLB_transcript7284/f2p0/2447,transcript_HQ_YNMLP_transcript17903/f2p0/1497,transcript_HQ_YNMLP_transcript18255/f3p0/1…
GO:0007339	binding of sperm to zona pellucida	biological_process	0.17117	1	3	22033	3	39009	transcript_HQ_YNMLP_transcript19750/f6p0/1237,transcript_HQ_YNLB_transcript17848/f4p0/1231,transcript_HQ_HBZL_transcript20289/f7p0/1217
GO:0009988	cell-cell recognition	biological_process	0.17117	1	3	22033	3	39009	transcript_HQ_YNMLP_transcript19750/f6p0/1237,transcript_HQ_HBZL_transcript20289/f7p0/1217,transcript_HQ_YNLB_transcript17848/f4p0/1231
GO:0035036	sperm-egg recognition	biological_process	0.17117	1	3	22033	3	39009	transcript_HQ_YNLB_transcript17848/f4p0/1231,transcript_HQ_HBZL_transcript20289/f7p0/1217,transcript_HQ_YNMLP_transcript19750/f6p0/1237
GO:0016011	dystroglycan complex	cellular_component	0.17182	1	5	22033	6	39009	transcript_HQ_HBZL_transcript6462/f2p0/2266,transcript_HQ_HBZL_transcript7156/f3p0/2308,transcript_HQ_HBZL_transcript22248/f5p0/966,transcript_HQ_HBZL_transcript22114/f3p0/1030,transcript_HQ_HBZL_transcript21617/f4p0/1085
GO:0016012	sarcoglycan complex	cellular_component	0.17182	1	5	22033	6	39009	transcript_HQ_HBZL_transcript6462/f2p0/2266,transcript_HQ_HBZL_transcript21617/f4p0/1085,transcript_HQ_HBZL_transcript22114/f3p0/1030,transcript_HQ_HBZL_transcript7156/f3p0/2308,transcript_HQ_HBZL_transcript22248/f5p0/966
GO:0031329	regulation of cellular catabolic process	biological_process	0.17194	1	105	22033	173	39009	transcript_HQ_YNMLP_transcript20317/f2p0/1160,transcript_HQ_HBZL_transcript455/f3p0/4300,transcript_HQ_YNMLP_transcript18728/f2p0/1363,transcript_HQ_HBZL_transcript3334/f7p0/2877,transcript_HQ_SCEZ_transcript19783/f4p0/1209,transcript_HQ_SCEZ_transcript5029/f6p0/2524,transcript_HQ_YNLB_transcript15684/f2p0/1570,transcript_HQ_HBZL_transcript21763/f3p0/1062,transcript_HQ_YNMLP_transcript4244/f2p0/3…
GO:0004392	heme oxygenase (decyclizing) activity	molecular_function	0.17224	1	3	22033	3	39009	transcript_HQ_HBZL_transcript20252/f4p0/1207,transcript_HQ_YNMLP_transcript20129/f2p0/1187,transcript_HQ_HBZL_transcript17656/f2p0/1474
GO:0006788	heme oxidation	biological_process	0.17224	1	3	22033	3	39009	transcript_HQ_HBZL_transcript17656/f2p0/1474,transcript_HQ_YNMLP_transcript20129/f2p0/1187,transcript_HQ_HBZL_transcript20252/f4p0/1207
GO:0031072	heat shock protein binding	molecular_function	0.17226	1	47	22033	76	39009	transcript_HQ_YNLB_transcript13351/f2p0/1825,transcript_HQ_YNMLP_transcript13626/f2p0/1969,transcript_HQ_HBZL_transcript12044/f7p0/1877,transcript_HQ_SCEZ_transcript13040/f4p0/1788,transcript_HQ_YNLB_transcript2469/f2p0/3271,transcript_HQ_YNMLP_transcript26471/f13p0/514,transcript_HQ_SCJY_transcript20394/f2p0/722,transcript_HQ_HBZL_transcript17198/f5p0/1554,transcript_HQ_SCJY_transcript12229/f2p0…
GO:0009772	photosynthetic electron transport in photosystem II	biological_process	0.17327	1	3	22033	3	39009	transcript_HQ_YNLB_transcript24363/f2p0/454,transcript_HQ_HBZL_transcript20243/f2p0/1235,transcript_HQ_YNLB_transcript668/f2p0/4225
GO:0035556	intracellular signal transduction	biological_process	0.17348	1	471	22033	807	39009	transcript_HQ_HBZL_transcript20804/f3p0/1175,transcript_HQ_HBZL_transcript22609/f3p0/978,transcript_HQ_HBZL_transcript12525/f2p0/1849,transcript_HQ_HBZL_transcript25274/f2p0/689,transcript_HQ_HBZL_transcript11823/f5p0/1919,transcript_HQ_HBZL_transcript6429/f2p0/2397,transcript_HQ_HBZL_transcript8046/f57p0/2185,transcript_HQ_YNLB_transcript18827/f4p0/1101,transcript_HQ_YNMLP_transcript4771/f4p0/29…
GO:0005549	odorant binding	molecular_function	0.17416	1	3	22033	3	39009	transcript_HQ_HBZL_transcript21788/f3p0/1103,transcript_HQ_HBZL_transcript1849/f10p0/3322,transcript_HQ_HBZL_transcript23664/f21p0/843
GO:0008837	diaminopimelate epimerase activity	molecular_function	0.17518	1	5	22033	6	39009	transcript_HQ_SCJY_transcript14225/f3p0/1452,transcript_HQ_HBZL_transcript17403/f3p0/1499,transcript_HQ_YNMLP_transcript17296/f2p0/1541,transcript_HQ_HBZL_transcript21379/f2p0/1083,transcript_HQ_HBZL_transcript16075/f2p0/1610
GO:0047661	amino-acid racemase activity	molecular_function	0.17518	1	5	22033	6	39009	transcript_HQ_SCJY_transcript14225/f3p0/1452,transcript_HQ_YNMLP_transcript17296/f2p0/1541,transcript_HQ_HBZL_transcript17403/f3p0/1499,transcript_HQ_HBZL_transcript21379/f2p0/1083,transcript_HQ_HBZL_transcript16075/f2p0/1610
GO:0015936	coenzyme A metabolic process	biological_process	0.17563	1	25	22033	38	39009	transcript_HQ_YNLB_transcript8495/f11p0/2311,transcript_HQ_YNLB_transcript10235/f3p0/2142,transcript_HQ_YNLB_transcript15357/f2p0/1587,transcript_HQ_YNMLP_transcript3043/f3p0/3299,transcript_HQ_YNMLP_transcript10511/f7p0/2315,transcript_HQ_SCJY_transcript12479/f2p0/1693,transcript_HQ_HBZL_transcript7044/f3p0/2314,transcript_HQ_HBZL_transcript1367/f2p0/3530,transcript_HQ_SCJY_transcript9683/f2p0/1…
GO:0005876	spindle microtubule	cellular_component	0.17747	1	21	22033	31	39009	transcript_HQ_YNMLP_transcript17781/f2p0/1487,transcript_HQ_HBZL_transcript417/f5p0/4413,transcript_HQ_YNLB_transcript808/f6p0/4135,transcript_HQ_HBZL_transcript4986/f2p0/2580,transcript_HQ_YNMLP_transcript882/f6p0/4160,transcript_HQ_HBZL_transcript629/f5p0/4110,transcript_HQ_YNMLP_transcript264/f2p0/5246,transcript_HQ_SCEZ_transcript5022/f13p0/2564,transcript_HQ_YNMLP_transcript25423/f3p0/645,tr…
GO:0035299	inositol pentakisphosphate 2-kinase activity	molecular_function	0.17824	1	3	22033	3	39009	transcript_HQ_YNLB_transcript13367/f2p0/1806,transcript_HQ_YNMLP_transcript14688/f2p0/1865,transcript_HQ_HBZL_transcript17937/f3p0/1459
GO:0009425	bacterial-type flagellum basal body	cellular_component	0.17827	1	5	22033	6	39009	transcript_HQ_HBZL_transcript20179/f3p0/1258,transcript_HQ_YNLB_transcript2754/f3p0/3209,transcript_HQ_YNMLP_transcript19200/f2p0/1255,transcript_HQ_SCEZ_transcript18545/f10p0/1329,transcript_HQ_SCJY_transcript15605/f2p0/1261
GO:0003714	transcription corepressor activity	molecular_function	0.17856	1	16	22033	24	39009	transcript_HQ_YNMLP_transcript18354/f2p0/1396,transcript_HQ_YNLB_transcript18638/f2p0/1127,transcript_HQ_HBZL_transcript6590/f9p0/2366,transcript_HQ_HBZL_transcript7857/f7p0/2231,transcript_HQ_YNMLP_transcript10190/f5p0/2349,transcript_HQ_HBZL_transcript9221/f3p0/2118,transcript_HQ_YNMLP_transcript10044/f3p0/2358,transcript_HQ_YNLB_transcript23555/f2p0/552,transcript_HQ_HBZL_transcript25504/f3p0/…
GO:0004411	homogentisate 1,2-dioxygenase activity	molecular_function	0.17862	1	3	22033	3	39009	transcript_HQ_HBZL_transcript15692/f3p0/1630,transcript_HQ_YNLB_transcript13741/f2p0/1809,transcript_HQ_YNLB_transcript14466/f2p0/1688
GO:0006559	L-phenylalanine catabolic process	biological_process	0.17862	1	3	22033	3	39009	transcript_HQ_YNLB_transcript13741/f2p0/1809,transcript_HQ_HBZL_transcript15692/f3p0/1630,transcript_HQ_YNLB_transcript14466/f2p0/1688
GO:1902222	erythrose 4-phosphate/phosphoenolpyruvate family amino acid catabolic process	biological_process	0.17862	1	3	22033	3	39009	transcript_HQ_YNLB_transcript13741/f2p0/1809,transcript_HQ_HBZL_transcript15692/f3p0/1630,transcript_HQ_YNLB_transcript14466/f2p0/1688
GO:0000390	spliceosomal complex disassembly	biological_process	0.17867	1	5	22033	6	39009	transcript_HQ_HBZL_transcript8401/f3p0/2186,transcript_HQ_HBZL_transcript7487/f2p0/2270,transcript_HQ_YNMLP_transcript9033/f4p0/2457,transcript_HQ_SCJY_transcript6004/f2p0/2355,transcript_HQ_SCJY_transcript19406/f2p0/811
GO:0005684	U2-type spliceosomal complex	cellular_component	0.17867	1	5	22033	6	39009	transcript_HQ_HBZL_transcript8401/f3p0/2186,transcript_HQ_YNMLP_transcript9033/f4p0/2457,transcript_HQ_HBZL_transcript7487/f2p0/2270,transcript_HQ_SCJY_transcript6004/f2p0/2355,transcript_HQ_SCJY_transcript19406/f2p0/811
GO:0032988	ribonucleoprotein complex disassembly	biological_process	0.17867	1	5	22033	6	39009	transcript_HQ_SCJY_transcript6004/f2p0/2355,transcript_HQ_SCJY_transcript19406/f2p0/811,transcript_HQ_HBZL_transcript8401/f3p0/2186,transcript_HQ_YNMLP_transcript9033/f4p0/2457,transcript_HQ_HBZL_transcript7487/f2p0/2270
GO:0071008	U2-type post-mRNA release spliceosomal complex	cellular_component	0.17867	1	5	22033	6	39009	transcript_HQ_SCJY_transcript19406/f2p0/811,transcript_HQ_SCJY_transcript6004/f2p0/2355,transcript_HQ_HBZL_transcript7487/f2p0/2270,transcript_HQ_YNMLP_transcript9033/f4p0/2457,transcript_HQ_HBZL_transcript8401/f3p0/2186
GO:0071014	post-mRNA release spliceosomal complex	cellular_component	0.17867	1	5	22033	6	39009	transcript_HQ_HBZL_transcript8401/f3p0/2186,transcript_HQ_HBZL_transcript7487/f2p0/2270,transcript_HQ_YNMLP_transcript9033/f4p0/2457,transcript_HQ_SCJY_transcript6004/f2p0/2355,transcript_HQ_SCJY_transcript19406/f2p0/811
GO:0060590	ATPase regulator activity	molecular_function	0.17881	1	65	22033	107	39009	transcript_HQ_YNMLP_transcript21234/f2p0/1082,transcript_HQ_YNLB_transcript22860/f2p0/631,transcript_HQ_YNMLP_transcript14620/f3p0/1872,transcript_HQ_YNMLP_transcript6437/f3p0/2777,transcript_HQ_HBZL_transcript23482/f3p0/891,transcript_HQ_SCJY_transcript19406/f2p0/811,transcript_HQ_YNMLP_transcript3650/f2p0/3172,transcript_HQ_YNMLP_transcript21449/f2p0/1040,transcript_HQ_HBZL_transcript21116/f6p0…
GO:0008284	positive regulation of cell proliferation	biological_process	0.17901	1	5	22033	6	39009	transcript_HQ_YNLB_transcript19306/f2p0/1047,transcript_HQ_YNMLP_transcript3606/f2p0/3300,transcript_HQ_HBZL_transcript1925/f2p0/3331,transcript_HQ_YNMLP_transcript21184/f4p0/1073,transcript_HQ_HBZL_transcript21423/f8p0/1101
GO:0042127	regulation of cell proliferation	biological_process	0.17901	1	5	22033	6	39009	transcript_HQ_YNMLP_transcript3606/f2p0/3300,transcript_HQ_YNLB_transcript19306/f2p0/1047,transcript_HQ_YNMLP_transcript21184/f4p0/1073,transcript_HQ_HBZL_transcript1925/f2p0/3331,transcript_HQ_HBZL_transcript21423/f8p0/1101
GO:0004185	serine-type carboxypeptidase activity	molecular_function	0.17946	1	40	22033	64	39009	transcript_HQ_YNLB_transcript14668/f5p0/1785,transcript_HQ_SCJY_transcript13153/f5p0/1605,transcript_HQ_HBZL_transcript10752/f2p0/1989,transcript_HQ_YNMLP_transcript17503/f2p0/1522,transcript_HQ_YNLB_transcript8019/f2p0/2371,transcript_HQ_YNMLP_transcript20851/f10p0/1110,transcript_HQ_HBZL_transcript12404/f2p0/1857,transcript_HQ_YNMLP_transcript10460/f5p0/2333,transcript_HQ_HBZL_transcript14380/f…
GO:0007094	mitotic spindle assembly checkpoint	biological_process	0.17956	1	17	22033	25	39009	transcript_HQ_HBZL_transcript21704/f2p0/1070,transcript_HQ_HBZL_transcript7062/f2p0/2323,transcript_HQ_YNLB_transcript17860/f2p0/1225,transcript_HQ_SCJY_transcript10115/f5p0/1922,transcript_HQ_YNLB_transcript16022/f3p0/1517,transcript_HQ_SCJY_transcript19801/f2p0/788,transcript_HQ_HBZL_transcript21/f2p0/7062,transcript_HQ_HBZL_transcript3113/f7p0/2949,transcript_HQ_YNMLP_transcript526/f2p0/4518,t…
GO:0009895	negative regulation of catabolic process	biological_process	0.17956	1	17	22033	25	39009	transcript_HQ_YNLB_transcript18947/f2p0/1046,transcript_HQ_YNMLP_transcript1108/f2p0/4014,transcript_HQ_YNLB_transcript48/f2p0/6942,transcript_HQ_YNMLP_transcript526/f2p0/4518,transcript_HQ_SCEZ_transcript19783/f4p0/1209,transcript_HQ_HBZL_transcript30/f3p0/6883,transcript_HQ_HBZL_transcript5855/f2p0/2521,transcript_HQ_YNMLP_transcript17903/f2p0/1497,transcript_HQ_YNMLP_transcript18728/f2p0/1363,…
GO:0010948	negative regulation of cell cycle process	biological_process	0.17956	1	17	22033	25	39009	transcript_HQ_HBZL_transcript5855/f2p0/2521,transcript_HQ_HBZL_transcript30/f3p0/6883,transcript_HQ_SCEZ_transcript19783/f4p0/1209,transcript_HQ_YNMLP_transcript1108/f2p0/4014,transcript_HQ_YNLB_transcript18947/f2p0/1046,transcript_HQ_YNLB_transcript48/f2p0/6942,transcript_HQ_YNMLP_transcript526/f2p0/4518,transcript_HQ_YNMLP_transcript18728/f2p0/1363,transcript_HQ_YNMLP_transcript17903/f2p0/1497,…
GO:0031330	negative regulation of cellular catabolic process	biological_process	0.17956	1	17	22033	25	39009	transcript_HQ_SCJY_transcript10115/f5p0/1922,transcript_HQ_YNLB_transcript17860/f2p0/1225,transcript_HQ_HBZL_transcript7062/f2p0/2323,transcript_HQ_HBZL_transcript21704/f2p0/1070,transcript_HQ_HBZL_transcript3113/f7p0/2949,transcript_HQ_HBZL_transcript21/f2p0/7062,transcript_HQ_SCJY_transcript19801/f2p0/788,transcript_HQ_YNLB_transcript16022/f3p0/1517,transcript_HQ_HBZL_transcript30/f3p0/6883,tra…
GO:0031396	regulation of protein ubiquitination	biological_process	0.17956	1	17	22033	25	39009	transcript_HQ_YNMLP_transcript17903/f2p0/1497,transcript_HQ_YNMLP_transcript18728/f2p0/1363,transcript_HQ_YNLB_transcript48/f2p0/6942,transcript_HQ_YNMLP_transcript526/f2p0/4518,transcript_HQ_YNMLP_transcript1108/f2p0/4014,transcript_HQ_YNLB_transcript18947/f2p0/1046,transcript_HQ_HBZL_transcript5855/f2p0/2521,transcript_HQ_HBZL_transcript30/f3p0/6883,transcript_HQ_SCEZ_transcript19783/f4p0/1209,…
GO:0031397	negative regulation of protein ubiquitination	biological_process	0.17956	1	17	22033	25	39009	transcript_HQ_SCEZ_transcript19783/f4p0/1209,transcript_HQ_HBZL_transcript30/f3p0/6883,transcript_HQ_HBZL_transcript5855/f2p0/2521,transcript_HQ_YNLB_transcript18947/f2p0/1046,transcript_HQ_YNMLP_transcript1108/f2p0/4014,transcript_HQ_YNMLP_transcript526/f2p0/4518,transcript_HQ_YNLB_transcript48/f2p0/6942,transcript_HQ_YNMLP_transcript18728/f2p0/1363,transcript_HQ_YNMLP_transcript17903/f2p0/1497,…
GO:0031577	spindle checkpoint	biological_process	0.17956	1	17	22033	25	39009	transcript_HQ_HBZL_transcript21/f2p0/7062,transcript_HQ_SCJY_transcript19801/f2p0/788,transcript_HQ_YNLB_transcript16022/f3p0/1517,transcript_HQ_HBZL_transcript3113/f7p0/2949,transcript_HQ_YNLB_transcript17860/f2p0/1225,transcript_HQ_SCJY_transcript10115/f5p0/1922,transcript_HQ_HBZL_transcript7062/f2p0/2323,transcript_HQ_HBZL_transcript21704/f2p0/1070,transcript_HQ_YNMLP_transcript17903/f2p0/1497…
GO:0032435	negative regulation of proteasomal ubiquitin-dependent protein catabolic process	biological_process	0.17956	1	17	22033	25	39009	transcript_HQ_SCJY_transcript10115/f5p0/1922,transcript_HQ_YNLB_transcript17860/f2p0/1225,transcript_HQ_HBZL_transcript7062/f2p0/2323,transcript_HQ_HBZL_transcript21704/f2p0/1070,transcript_HQ_HBZL_transcript3113/f7p0/2949,transcript_HQ_YNLB_transcript16022/f3p0/1517,transcript_HQ_HBZL_transcript21/f2p0/7062,transcript_HQ_SCJY_transcript19801/f2p0/788,transcript_HQ_SCEZ_transcript19783/f4p0/1209,…
GO:0033046	negative regulation of sister chromatid segregation	biological_process	0.17956	1	17	22033	25	39009	transcript_HQ_HBZL_transcript3113/f7p0/2949,transcript_HQ_HBZL_transcript21/f2p0/7062,transcript_HQ_SCJY_transcript19801/f2p0/788,transcript_HQ_YNLB_transcript16022/f3p0/1517,transcript_HQ_YNLB_transcript17860/f2p0/1225,transcript_HQ_HBZL_transcript7062/f2p0/2323,transcript_HQ_SCJY_transcript10115/f5p0/1922,transcript_HQ_HBZL_transcript21704/f2p0/1070,transcript_HQ_YNMLP_transcript18728/f2p0/1363…
GO:0033048	negative regulation of mitotic sister chromatid segregation	biological_process	0.17956	1	17	22033	25	39009	transcript_HQ_HBZL_transcript21704/f2p0/1070,transcript_HQ_HBZL_transcript7062/f2p0/2323,transcript_HQ_YNLB_transcript17860/f2p0/1225,transcript_HQ_SCJY_transcript10115/f5p0/1922,transcript_HQ_HBZL_transcript3113/f7p0/2949,transcript_HQ_SCJY_transcript19801/f2p0/788,transcript_HQ_HBZL_transcript21/f2p0/7062,transcript_HQ_YNLB_transcript16022/f3p0/1517,transcript_HQ_HBZL_transcript5855/f2p0/2521,t…
GO:0042177	negative regulation of protein catabolic process	biological_process	0.17956	1	17	22033	25	39009	transcript_HQ_HBZL_transcript3113/f7p0/2949,transcript_HQ_SCJY_transcript19801/f2p0/788,transcript_HQ_HBZL_transcript21/f2p0/7062,transcript_HQ_YNLB_transcript16022/f3p0/1517,transcript_HQ_HBZL_transcript21704/f2p0/1070,transcript_HQ_HBZL_transcript7062/f2p0/2323,transcript_HQ_YNLB_transcript17860/f2p0/1225,transcript_HQ_SCJY_transcript10115/f5p0/1922,transcript_HQ_YNMLP_transcript18728/f2p0/1363…
GO:0045839	negative regulation of mitotic nuclear division	biological_process	0.17956	1	17	22033	25	39009	transcript_HQ_YNMLP_transcript17903/f2p0/1497,transcript_HQ_YNMLP_transcript18728/f2p0/1363,transcript_HQ_YNMLP_transcript526/f2p0/4518,transcript_HQ_YNLB_transcript48/f2p0/6942,transcript_HQ_YNMLP_transcript1108/f2p0/4014,transcript_HQ_YNLB_transcript18947/f2p0/1046,transcript_HQ_HBZL_transcript5855/f2p0/2521,transcript_HQ_HBZL_transcript30/f3p0/6883,transcript_HQ_SCEZ_transcript19783/f4p0/1209,…
GO:0045841	negative regulation of mitotic metaphase/anaphase transition	biological_process	0.17956	1	17	22033	25	39009	transcript_HQ_SCJY_transcript10115/f5p0/1922,transcript_HQ_YNLB_transcript17860/f2p0/1225,transcript_HQ_HBZL_transcript7062/f2p0/2323,transcript_HQ_HBZL_transcript21704/f2p0/1070,transcript_HQ_HBZL_transcript3113/f7p0/2949,transcript_HQ_HBZL_transcript21/f2p0/7062,transcript_HQ_SCJY_transcript19801/f2p0/788,transcript_HQ_YNLB_transcript16022/f3p0/1517,transcript_HQ_SCEZ_transcript19783/f4p0/1209,…
GO:0051340	regulation of ligase activity	biological_process	0.17956	1	17	22033	25	39009	transcript_HQ_YNMLP_transcript18728/f2p0/1363,transcript_HQ_YNMLP_transcript17903/f2p0/1497,transcript_HQ_HBZL_transcript5855/f2p0/2521,transcript_HQ_SCEZ_transcript19783/f4p0/1209,transcript_HQ_HBZL_transcript30/f3p0/6883,transcript_HQ_YNLB_transcript48/f2p0/6942,transcript_HQ_YNMLP_transcript526/f2p0/4518,transcript_HQ_YNMLP_transcript1108/f2p0/4014,transcript_HQ_YNLB_transcript18947/f2p0/1046,…
GO:0051352	negative regulation of ligase activity	biological_process	0.17956	1	17	22033	25	39009	transcript_HQ_YNLB_transcript17860/f2p0/1225,transcript_HQ_SCJY_transcript10115/f5p0/1922,transcript_HQ_HBZL_transcript7062/f2p0/2323,transcript_HQ_HBZL_transcript21704/f2p0/1070,transcript_HQ_YNLB_transcript16022/f3p0/1517,transcript_HQ_HBZL_transcript21/f2p0/7062,transcript_HQ_SCJY_transcript19801/f2p0/788,transcript_HQ_HBZL_transcript3113/f7p0/2949,transcript_HQ_YNLB_transcript48/f2p0/6942,tra…
GO:0051436	negative regulation of ubiquitin-protein ligase activity involved in mitotic cell cycle	biological_process	0.17956	1	17	22033	25	39009	transcript_HQ_YNMLP_transcript17903/f2p0/1497,transcript_HQ_YNMLP_transcript18728/f2p0/1363,transcript_HQ_YNLB_transcript18947/f2p0/1046,transcript_HQ_YNMLP_transcript1108/f2p0/4014,transcript_HQ_YNLB_transcript48/f2p0/6942,transcript_HQ_YNMLP_transcript526/f2p0/4518,transcript_HQ_HBZL_transcript30/f3p0/6883,transcript_HQ_SCEZ_transcript19783/f4p0/1209,transcript_HQ_HBZL_transcript5855/f2p0/2521,…
GO:0051438	regulation of ubiquitin-protein transferase activity	biological_process	0.17956	1	17	22033	25	39009	transcript_HQ_YNMLP_transcript18728/f2p0/1363,transcript_HQ_YNMLP_transcript17903/f2p0/1497,transcript_HQ_SCEZ_transcript19783/f4p0/1209,transcript_HQ_HBZL_transcript30/f3p0/6883,transcript_HQ_HBZL_transcript5855/f2p0/2521,transcript_HQ_YNLB_transcript48/f2p0/6942,transcript_HQ_YNMLP_transcript526/f2p0/4518,transcript_HQ_YNLB_transcript18947/f2p0/1046,transcript_HQ_YNMLP_transcript1108/f2p0/4014,…
GO:0051439	regulation of ubiquitin-protein ligase activity involved in mitotic cell cycle	biological_process	0.17956	1	17	22033	25	39009	transcript_HQ_HBZL_transcript5855/f2p0/2521,transcript_HQ_SCEZ_transcript19783/f4p0/1209,transcript_HQ_HBZL_transcript30/f3p0/6883,transcript_HQ_YNMLP_transcript1108/f2p0/4014,transcript_HQ_YNLB_transcript18947/f2p0/1046,transcript_HQ_YNLB_transcript48/f2p0/6942,transcript_HQ_YNMLP_transcript526/f2p0/4518,transcript_HQ_YNMLP_transcript18728/f2p0/1363,transcript_HQ_YNMLP_transcript17903/f2p0/1497,…
GO:0051444	negative regulation of ubiquitin-protein transferase activity	biological_process	0.17956	1	17	22033	25	39009	transcript_HQ_HBZL_transcript21704/f2p0/1070,transcript_HQ_HBZL_transcript7062/f2p0/2323,transcript_HQ_YNLB_transcript17860/f2p0/1225,transcript_HQ_SCJY_transcript10115/f5p0/1922,transcript_HQ_SCJY_transcript19801/f2p0/788,transcript_HQ_HBZL_transcript21/f2p0/7062,transcript_HQ_YNLB_transcript16022/f3p0/1517,transcript_HQ_HBZL_transcript3113/f7p0/2949,transcript_HQ_YNMLP_transcript1108/f2p0/4014,…
GO:0051784	negative regulation of nuclear division	biological_process	0.17956	1	17	22033	25	39009	transcript_HQ_YNLB_transcript48/f2p0/6942,transcript_HQ_YNMLP_transcript526/f2p0/4518,transcript_HQ_YNMLP_transcript1108/f2p0/4014,transcript_HQ_YNLB_transcript18947/f2p0/1046,transcript_HQ_HBZL_transcript5855/f2p0/2521,transcript_HQ_SCEZ_transcript19783/f4p0/1209,transcript_HQ_HBZL_transcript30/f3p0/6883,transcript_HQ_YNMLP_transcript17903/f2p0/1497,transcript_HQ_YNMLP_transcript18728/f2p0/1363,…
GO:0051985	negative regulation of chromosome segregation	biological_process	0.17956	1	17	22033	25	39009	transcript_HQ_YNLB_transcript48/f2p0/6942,transcript_HQ_YNMLP_transcript526/f2p0/4518,transcript_HQ_YNMLP_transcript1108/f2p0/4014,transcript_HQ_YNLB_transcript18947/f2p0/1046,transcript_HQ_HBZL_transcript5855/f2p0/2521,transcript_HQ_SCEZ_transcript19783/f4p0/1209,transcript_HQ_HBZL_transcript30/f3p0/6883,transcript_HQ_YNMLP_transcript17903/f2p0/1497,transcript_HQ_YNMLP_transcript18728/f2p0/1363,…
GO:0071173	spindle assembly checkpoint	biological_process	0.17956	1	17	22033	25	39009	transcript_HQ_SCJY_transcript10115/f5p0/1922,transcript_HQ_YNLB_transcript17860/f2p0/1225,transcript_HQ_HBZL_transcript7062/f2p0/2323,transcript_HQ_HBZL_transcript21704/f2p0/1070,transcript_HQ_HBZL_transcript3113/f7p0/2949,transcript_HQ_YNLB_transcript16022/f3p0/1517,transcript_HQ_HBZL_transcript21/f2p0/7062,transcript_HQ_SCJY_transcript19801/f2p0/788,transcript_HQ_SCEZ_transcript19783/f4p0/1209,…
GO:0071174	mitotic spindle checkpoint	biological_process	0.17956	1	17	22033	25	39009	transcript_HQ_HBZL_transcript5855/f2p0/2521,transcript_HQ_HBZL_transcript30/f3p0/6883,transcript_HQ_SCEZ_transcript19783/f4p0/1209,transcript_HQ_YNMLP_transcript1108/f2p0/4014,transcript_HQ_YNLB_transcript18947/f2p0/1046,transcript_HQ_YNLB_transcript48/f2p0/6942,transcript_HQ_YNMLP_transcript526/f2p0/4518,transcript_HQ_YNMLP_transcript18728/f2p0/1363,transcript_HQ_YNMLP_transcript17903/f2p0/1497,…
GO:1901799	negative regulation of proteasomal protein catabolic process	biological_process	0.17956	1	17	22033	25	39009	transcript_HQ_YNLB_transcript16022/f3p0/1517,transcript_HQ_SCJY_transcript19801/f2p0/788,transcript_HQ_HBZL_transcript21/f2p0/7062,transcript_HQ_HBZL_transcript3113/f7p0/2949,transcript_HQ_HBZL_transcript21704/f2p0/1070,transcript_HQ_YNLB_transcript17860/f2p0/1225,transcript_HQ_HBZL_transcript7062/f2p0/2323,transcript_HQ_SCJY_transcript10115/f5p0/1922,transcript_HQ_YNMLP_transcript17903/f2p0/1497…
GO:1901988	negative regulation of cell cycle phase transition	biological_process	0.17956	1	17	22033	25	39009	transcript_HQ_YNLB_transcript16022/f3p0/1517,transcript_HQ_SCJY_transcript19801/f2p0/788,transcript_HQ_HBZL_transcript21/f2p0/7062,transcript_HQ_HBZL_transcript3113/f7p0/2949,transcript_HQ_HBZL_transcript21704/f2p0/1070,transcript_HQ_SCJY_transcript10115/f5p0/1922,transcript_HQ_YNLB_transcript17860/f2p0/1225,transcript_HQ_HBZL_transcript7062/f2p0/2323,transcript_HQ_YNMLP_transcript17903/f2p0/1497…
GO:1901991	negative regulation of mitotic cell cycle phase transition	biological_process	0.17956	1	17	22033	25	39009	transcript_HQ_HBZL_transcript21704/f2p0/1070,transcript_HQ_HBZL_transcript7062/f2p0/2323,transcript_HQ_YNLB_transcript17860/f2p0/1225,transcript_HQ_SCJY_transcript10115/f5p0/1922,transcript_HQ_YNLB_transcript16022/f3p0/1517,transcript_HQ_SCJY_transcript19801/f2p0/788,transcript_HQ_HBZL_transcript21/f2p0/7062,transcript_HQ_HBZL_transcript3113/f7p0/2949,transcript_HQ_YNLB_transcript48/f2p0/6942,tra…
GO:1902100	negative regulation of metaphase/anaphase transition of cell cycle	biological_process	0.17956	1	17	22033	25	39009	transcript_HQ_YNMLP_transcript18728/f2p0/1363,transcript_HQ_YNMLP_transcript17903/f2p0/1497,transcript_HQ_SCEZ_transcript19783/f4p0/1209,transcript_HQ_HBZL_transcript30/f3p0/6883,transcript_HQ_HBZL_transcript5855/f2p0/2521,transcript_HQ_YNLB_transcript18947/f2p0/1046,transcript_HQ_YNMLP_transcript1108/f2p0/4014,transcript_HQ_YNMLP_transcript526/f2p0/4518,transcript_HQ_YNLB_transcript48/f2p0/6942,…
GO:1903051	negative regulation of proteolysis involved in cellular protein catabolic process	biological_process	0.17956	1	17	22033	25	39009	transcript_HQ_HBZL_transcript21/f2p0/7062,transcript_HQ_SCJY_transcript19801/f2p0/788,transcript_HQ_YNLB_transcript16022/f3p0/1517,transcript_HQ_HBZL_transcript3113/f7p0/2949,transcript_HQ_YNLB_transcript17860/f2p0/1225,transcript_HQ_HBZL_transcript7062/f2p0/2323,transcript_HQ_SCJY_transcript10115/f5p0/1922,transcript_HQ_HBZL_transcript21704/f2p0/1070,transcript_HQ_YNMLP_transcript17903/f2p0/1497…
GO:1903320	regulation of protein modification by small protein conjugation or removal	biological_process	0.17956	1	17	22033	25	39009	transcript_HQ_YNLB_transcript16022/f3p0/1517,transcript_HQ_HBZL_transcript21/f2p0/7062,transcript_HQ_SCJY_transcript19801/f2p0/788,transcript_HQ_HBZL_transcript3113/f7p0/2949,transcript_HQ_YNLB_transcript17860/f2p0/1225,transcript_HQ_SCJY_transcript10115/f5p0/1922,transcript_HQ_HBZL_transcript7062/f2p0/2323,transcript_HQ_HBZL_transcript21704/f2p0/1070,transcript_HQ_YNMLP_transcript17903/f2p0/1497…
GO:1903321	negative regulation of protein modification by small protein conjugation or removal	biological_process	0.17956	1	17	22033	25	39009	transcript_HQ_YNMLP_transcript17903/f2p0/1497,transcript_HQ_YNMLP_transcript18728/f2p0/1363,transcript_HQ_YNMLP_transcript1108/f2p0/4014,transcript_HQ_YNLB_transcript18947/f2p0/1046,transcript_HQ_YNMLP_transcript526/f2p0/4518,transcript_HQ_YNLB_transcript48/f2p0/6942,transcript_HQ_HBZL_transcript5855/f2p0/2521,transcript_HQ_SCEZ_transcript19783/f4p0/1209,transcript_HQ_HBZL_transcript30/f3p0/6883,…
GO:1903363	negative regulation of cellular protein catabolic process	biological_process	0.17956	1	17	22033	25	39009	transcript_HQ_HBZL_transcript21704/f2p0/1070,transcript_HQ_YNLB_transcript17860/f2p0/1225,transcript_HQ_SCJY_transcript10115/f5p0/1922,transcript_HQ_HBZL_transcript7062/f2p0/2323,transcript_HQ_SCJY_transcript19801/f2p0/788,transcript_HQ_HBZL_transcript21/f2p0/7062,transcript_HQ_YNLB_transcript16022/f3p0/1517,transcript_HQ_HBZL_transcript3113/f7p0/2949,transcript_HQ_YNMLP_transcript1108/f2p0/4014,…
GO:1904666	regulation of ubiquitin protein ligase activity	biological_process	0.17956	1	17	22033	25	39009	transcript_HQ_YNMLP_transcript17903/f2p0/1497,transcript_HQ_YNMLP_transcript18728/f2p0/1363,transcript_HQ_YNLB_transcript18947/f2p0/1046,transcript_HQ_YNMLP_transcript1108/f2p0/4014,transcript_HQ_YNMLP_transcript526/f2p0/4518,transcript_HQ_YNLB_transcript48/f2p0/6942,transcript_HQ_SCEZ_transcript19783/f4p0/1209,transcript_HQ_HBZL_transcript30/f3p0/6883,transcript_HQ_HBZL_transcript5855/f2p0/2521,…
GO:1904667	negative regulation of ubiquitin protein ligase activity	biological_process	0.17956	1	17	22033	25	39009	transcript_HQ_YNMLP_transcript17903/f2p0/1497,transcript_HQ_YNMLP_transcript18728/f2p0/1363,transcript_HQ_YNMLP_transcript1108/f2p0/4014,transcript_HQ_YNLB_transcript18947/f2p0/1046,transcript_HQ_YNLB_transcript48/f2p0/6942,transcript_HQ_YNMLP_transcript526/f2p0/4518,transcript_HQ_HBZL_transcript5855/f2p0/2521,transcript_HQ_HBZL_transcript30/f3p0/6883,transcript_HQ_SCEZ_transcript19783/f4p0/1209,…
GO:2000816	negative regulation of mitotic sister chromatid separation	biological_process	0.17956	1	17	22033	25	39009	transcript_HQ_HBZL_transcript5855/f2p0/2521,transcript_HQ_HBZL_transcript30/f3p0/6883,transcript_HQ_SCEZ_transcript19783/f4p0/1209,transcript_HQ_YNMLP_transcript1108/f2p0/4014,transcript_HQ_YNLB_transcript18947/f2p0/1046,transcript_HQ_YNMLP_transcript526/f2p0/4518,transcript_HQ_YNLB_transcript48/f2p0/6942,transcript_HQ_YNMLP_transcript18728/f2p0/1363,transcript_HQ_YNMLP_transcript17903/f2p0/1497,…
GO:2001251	negative regulation of chromosome organization	biological_process	0.17956	1	17	22033	25	39009	transcript_HQ_HBZL_transcript30/f3p0/6883,transcript_HQ_SCEZ_transcript19783/f4p0/1209,transcript_HQ_HBZL_transcript5855/f2p0/2521,transcript_HQ_YNMLP_transcript526/f2p0/4518,transcript_HQ_YNLB_transcript48/f2p0/6942,transcript_HQ_YNLB_transcript18947/f2p0/1046,transcript_HQ_YNMLP_transcript1108/f2p0/4014,transcript_HQ_YNMLP_transcript18728/f2p0/1363,transcript_HQ_YNMLP_transcript17903/f2p0/1497,…
GO:0018580	nitronate monooxygenase activity	molecular_function	0.17963	1	40	22033	64	39009	transcript_HQ_HBZL_transcript10386/f4p0/2007,transcript_HQ_YNLB_transcript13899/f2p0/1765,transcript_HQ_HBZL_transcript13345/f2p0/1803,transcript_HQ_YNLB_transcript17125/f2p0/1339,transcript_HQ_HBZL_transcript18731/f3p0/1375,transcript_HQ_SCJY_transcript14946/f5p0/1352,transcript_HQ_YNLB_transcript14607/f2p0/1676,transcript_HQ_YNMLP_transcript19506/f3p0/1259,transcript_HQ_YNMLP_transcript21485/f2…
GO:0043167	ion binding	molecular_function	0.18037	1	6824	22033	11923	39009	transcript_HQ_YNMLP_transcript19506/f3p0/1259,transcript_HQ_YNMLP_transcript2856/f3p0/3354,transcript_HQ_HBZL_transcript4966/f3p0/2604,transcript_HQ_HBZL_transcript3516/f3p0/2830,transcript_HQ_SCJY_transcript10520/f4p0/1887,transcript_HQ_HBZL_transcript20800/f2p0/1170,transcript_HQ_HBZL_transcript13153/f4p0/1802,transcript_HQ_SCEZ_transcript15673/f4p0/1605,transcript_HQ_YNMLP_transcript5241/f6p0/…
t_HQ_HBZL_transcript649/f2p0/4074,transcript_HQ_SCJY_transcript10931/f3p0/1835,transcript_HQ_HBZL_transcript23108/f30p0/860,transcript_HQ_HBZL_transcript9085/f2p0/2112,transcript_HQ_YNLB_transcript4521/f2p0/2817,transcript_HQ_HBZL_transcript656/f2p0/4059,transcript_HQ_YNLB_transcript632/f3p0/4298,transcript_HQ_HBZL_transcript17897/f5p0/1498,transcript_HQ_YNLB_transcript17309/f4p0/1312,transcript_…
nscript_HQ_HBZL_transcript15660/f4p0/1630,transcript_HQ_HBZL_transcript6410/f7p0/2405,transcript_HQ_YNMLP_transcript1784/f2p0/3693,transcript_HQ_YNLB_transcript2893/f2p0/3139,transcript_HQ_YNLB_transcript7922/f3p0/2380,transcript_HQ_HBZL_transcript8818/f4p0/2136,transcript_HQ_SCJY_transcript15711/f2p0/1243,transcript_HQ_SCJY_transcript5764/f6p0/2448,transcript_HQ_YNLB_transcript2156/f2p0/3375,tra…
cript_HQ_YNLB_transcript16201/f2p0/1475,transcript_HQ_SCEZ_transcript19238/f5p0/1326,transcript_HQ_YNLB_transcript1979/f2p0/3559,transcript_HQ_HBZL_transcript620/f5p0/4070,transcript_HQ_YNMLP_transcript7701/f4p0/2617,transcript_HQ_YNMLP_transcript15628/f2p0/1745,transcript_HQ_YNMLP_transcript101/f3p0/6300,transcript_HQ_YNMLP_transcript10026/f2p0/2364,transcript_HQ_HBZL_transcript17777/f47p0/1353,…
anscript13944/f10p0/1753,transcript_HQ_YNMLP_transcript19403/f2p0/1256,transcript_HQ_YNLB_transcript8193/f5p0/2378,transcript_HQ_YNMLP_transcript3105/f3p0/3294,transcript_HQ_YNLB_transcript2372/f6p0/3308,transcript_HQ_HBZL_transcript18577/f2p0/1393,transcript_HQ_HBZL_transcript7997/f3p0/2198,transcript_HQ_YNLB_transcript729/f3p0/4168,transcript_HQ_HBZL_transcript10428/f2p0/2080,transcript_HQ_HBZL…
3867/f10p0/1778,transcript_HQ_SCJY_transcript7888/f3p0/2161,transcript_HQ_HBZL_transcript17799/f8p0/1550,transcript_HQ_HBZL_transcript8245/f2p0/2222,transcript_HQ_YNLB_transcript10897/f6p0/2066,transcript_HQ_HBZL_transcript14751/f4p0/1706,transcript_HQ_YNMLP_transcript18701/f3p0/1378,transcript_HQ_YNMLP_transcript16211/f3p0/1676,transcript_HQ_YNMLP_transcript10247/f40p0/2344,transcript_HQ_HBZL_tr…
script_HQ_SCJY_transcript2143/f2p0/2981,transcript_HQ_YNMLP_transcript10519/f4p0/2308,transcript_HQ_YNMLP_transcript5838/f2p0/2817,transcript_HQ_SCEZ_transcript7699/f3p0/2199,transcript_HQ_YNMLP_transcript14688/f2p0/1865,transcript_HQ_YNLB_transcript3640/f2p0/2991,transcript_HQ_YNMLP_transcript26297/f2p0/553,transcript_HQ_YNMLP_transcript23023/f2p0/901,transcript_HQ_HBZL_transcript1240/f7p0/3589,…
ranscript2797/f3p0/3378,transcript_HQ_YNMLP_transcript15274/f2p0/1781,transcript_HQ_YNMLP_transcript3516/f2p0/3188,transcript_HQ_HBZL_transcript3946/f2p0/2743,transcript_HQ_YNLB_transcript10732/f3p0/2078,transcript_HQ_HBZL_transcript292/f2p0/4705,transcript_HQ_HBZL_transcript8895/f2p0/2127,transcript_HQ_YNLB_transcript376/f3p0/4779,transcript_HQ_YNMLP_transcript3358/f3p0/3227,transcript_HQ_YNMLP_…
993,transcript_HQ_HBZL_transcript17315/f2p0/1485,transcript_HQ_SCJY_transcript14023/f24p0/1483,transcript_HQ_YNLB_transcript12737/f2p0/1889,transcript_HQ_HBZL_transcript12762/f31p0/1781,transcript_HQ_HBZL_transcript16249/f2p0/1589,transcript_HQ_HBZL_transcript2517/f3p0/3082,transcript_HQ_YNMLP_transcript2174/f5p0/3561,transcript_HQ_YNMLP_transcript10925/f2p0/2319,transcript_HQ_YNLB_transcript8539…
5528/f3p0/2532,transcript_HQ_YNLB_transcript20486/f2p0/913,transcript_HQ_SCJY_transcript22512/f4p0/524,transcript_HQ_SCJY_transcript10998/f2p0/1846,transcript_HQ_YNLB_transcript174/f2p0/5656,transcript_HQ_SCJY_transcript18181/f2p0/948,transcript_HQ_HBZL_transcript1532/f2p0/3458,transcript_HQ_HBZL_transcript8328/f8p0/2209,transcript_HQ_YNLB_transcript642/f2p0/4272,transcript_HQ_HBZL_transcript2647…
GO:0048029	monosaccharide binding	molecular_function	0.1805	1	3	22033	3	39009	transcript_HQ_YNLB_transcript8481/f2p0/2334,transcript_HQ_HBZL_transcript10725/f4p0/1985,transcript_HQ_HBZL_transcript9416/f4p0/2077
GO:0016514	SWI/SNF complex	cellular_component	0.18068	1	7	22033	9	39009	transcript_HQ_HBZL_transcript4342/f2p0/2706,transcript_HQ_YNLB_transcript5484/f4p0/2694,transcript_HQ_YNLB_transcript7454/f2p0/2431,transcript_HQ_YNMLP_transcript7670/f3p0/2608,transcript_HQ_YNMLP_transcript7242/f2p0/2681,transcript_HQ_HBZL_transcript4520/f5p0/2576,transcript_HQ_HBZL_transcript5924/f3p0/2441
GO:0090544	BAF-type complex	cellular_component	0.18068	1	7	22033	9	39009	transcript_HQ_HBZL_transcript5924/f3p0/2441,transcript_HQ_YNLB_transcript7454/f2p0/2431,transcript_HQ_YNLB_transcript5484/f4p0/2694,transcript_HQ_YNMLP_transcript7242/f2p0/2681,transcript_HQ_YNMLP_transcript7670/f3p0/2608,transcript_HQ_HBZL_transcript4520/f5p0/2576,transcript_HQ_HBZL_transcript4342/f2p0/2706
GO:0016892	endoribonuclease activity, producing 3'-phosphomonoesters	molecular_function	0.18106	1	26	22033	41	39009	transcript_HQ_SCJY_transcript16996/f2p0/1081,transcript_HQ_YNMLP_transcript2119/f2p0/3568,transcript_HQ_YNLB_transcript19905/f2p0/976,transcript_HQ_HBZL_transcript23611/f7p0/859,transcript_HQ_HBZL_transcript22983/f5p0/926,transcript_HQ_YNLB_transcript1395/f2p0/3710,transcript_HQ_HBZL_transcript23105/f2p0/935,transcript_HQ_YNLB_transcript20841/f2p0/855,transcript_HQ_HBZL_transcript21198/f8p0/1122,…
GO:0016894	endonuclease activity, active with either ribo- or deoxyribonucleic acids and producing 3'-phosphomonoesters	molecular_function	0.18106	1	26	22033	41	39009	transcript_HQ_YNMLP_transcript21593/f2p0/1041,transcript_HQ_HBZL_transcript21198/f8p0/1122,transcript_HQ_YNMLP_transcript21266/f2p0/1062,transcript_HQ_SCEZ_transcript22463/f4p0/936,transcript_HQ_YNLB_transcript10614/f3p0/2112,transcript_HQ_HBZL_transcript26948/f2p0/520,transcript_HQ_YNLB_transcript19905/f2p0/976,transcript_HQ_HBZL_transcript23611/f7p0/859,transcript_HQ_HBZL_transcript22983/f5p0/9…
GO:0016462	pyrophosphatase activity	molecular_function	0.18119	1	1033	22033	1773	39009	transcript_HQ_YNMLP_transcript26162/f3p0/568,transcript_HQ_YNLB_transcript17249/f2p0/1313,transcript_HQ_HBZL_transcript531/f2p0/4231,transcript_HQ_YNMLP_transcript20135/f5p0/1301,transcript_HQ_HBZL_transcript6201/f16p0/2418,transcript_HQ_HBZL_transcript13700/f2p0/1768,transcript_HQ_SCJY_transcript5330/f5p0/2494,transcript_HQ_HBZL_transcript1599/f2p0/3430,transcript_HQ_YNMLP_transcript6690/f4p0/27…
transcript6811/f2p0/2303,transcript_HQ_YNMLP_transcript4996/f4p0/2917,transcript_HQ_YNLB_transcript6144/f2p0/2571,transcript_HQ_HBZL_transcript11951/f3p0/1900,transcript_HQ_HBZL_transcript22143/f2p0/1021,transcript_HQ_YNMLP_transcript18427/f3p0/1385,transcript_HQ_HBZL_transcript1503/f2p0/3452,transcript_HQ_HBZL_transcript5296/f2p0/2553,transcript_HQ_HBZL_transcript25274/f2p0/689,transcript_HQ_YNM…
GO:0030291	protein serine/threonine kinase inhibitor activity	molecular_function	0.18215	1	5	22033	6	39009	transcript_HQ_HBZL_transcript18321/f2p0/1429,transcript_HQ_HBZL_transcript13784/f2p0/1764,transcript_HQ_SCEZ_transcript17899/f2p0/1401,transcript_HQ_HBZL_transcript315/f2p0/4645,transcript_HQ_HBZL_transcript21075/f2p0/1138
GO:0051499	D-aminoacyl-tRNA deacylase activity	molecular_function	0.18305	1	3	22033	3	39009	transcript_HQ_HBZL_transcript18578/f2p0/1394,transcript_HQ_YNMLP_transcript8686/f2p0/2567,transcript_HQ_YNMLP_transcript6301/f2p0/2772
GO:0017108	5'-flap endonuclease activity	molecular_function	0.18307	1	8	22033	11	39009	transcript_HQ_HBZL_transcript26733/f3p0/543,transcript_HQ_HBZL_transcript22255/f2p0/1022,transcript_HQ_YNMLP_transcript20639/f2p0/1132,transcript_HQ_SCJY_transcript17789/f2p0/981,transcript_HQ_YNLB_transcript17285/f3p0/1336,transcript_HQ_SCJY_transcript16516/f6p0/1141,transcript_HQ_YNLB_transcript24010/f13p0/492,transcript_HQ_SCJY_transcript17707/f3p0/1005
GO:0033557	Slx1-Slx4 complex	cellular_component	0.18307	1	8	22033	11	39009	transcript_HQ_SCJY_transcript17707/f3p0/1005,transcript_HQ_YNLB_transcript24010/f13p0/492,transcript_HQ_SCJY_transcript16516/f6p0/1141,transcript_HQ_YNLB_transcript17285/f3p0/1336,transcript_HQ_SCJY_transcript17789/f2p0/981,transcript_HQ_YNMLP_transcript20639/f2p0/1132,transcript_HQ_HBZL_transcript22255/f2p0/1022,transcript_HQ_HBZL_transcript26733/f3p0/543
GO:0048256	flap endonuclease activity	molecular_function	0.18307	1	8	22033	11	39009	transcript_HQ_YNLB_transcript17285/f3p0/1336,transcript_HQ_YNLB_transcript24010/f13p0/492,transcript_HQ_SCJY_transcript16516/f6p0/1141,transcript_HQ_SCJY_transcript17707/f3p0/1005,transcript_HQ_HBZL_transcript26733/f3p0/543,transcript_HQ_SCJY_transcript17789/f2p0/981,transcript_HQ_HBZL_transcript22255/f2p0/1022,transcript_HQ_YNMLP_transcript20639/f2p0/1132
GO:0000772	mating pheromone activity	molecular_function	0.18349	1	3	22033	3	39009	transcript_HQ_YNMLP_transcript8770/f2p0/2494,transcript_HQ_YNLB_transcript6909/f4p0/2517,transcript_HQ_HBZL_transcript6662/f12p0/2369
GO:0006516	glycoprotein catabolic process	biological_process	0.18402	1	3	22033	3	39009	transcript_HQ_HBZL_transcript4844/f4p0/2598,transcript_HQ_YNLB_transcript6689/f3p0/2525,transcript_HQ_SCJY_transcript6300/f2p0/2352
GO:0030163	protein catabolic process	biological_process	0.18539	1	205	22033	349	39009	transcript_HQ_HBZL_transcript4270/f2p0/2699,transcript_HQ_YNLB_transcript16022/f3p0/1517,transcript_HQ_HBZL_transcript3113/f7p0/2949,transcript_HQ_HBZL_transcript19639/f2p0/1304,transcript_HQ_SCJY_transcript22148/f2p0/565,transcript_HQ_YNMLP_transcript9303/f2p0/2461,transcript_HQ_HBZL_transcript21704/f2p0/1070,transcript_HQ_YNMLP_transcript18795/f2p0/1346,transcript_HQ_YNLB_transcript3578/f7p0/30…
GO:0017176	phosphatidylinositol N-acetylglucosaminyltransferase activity	molecular_function	0.1862	1	5	22033	6	39009	transcript_HQ_HBZL_transcript3917/f3p0/2760,transcript_HQ_HBZL_transcript8092/f2p0/2217,transcript_HQ_HBZL_transcript12947/f3p0/1837,transcript_HQ_YNLB_transcript5889/f2p0/2631,transcript_HQ_HBZL_transcript8740/f2p0/2146
GO:0015937	coenzyme A biosynthetic process	biological_process	0.18624	1	17	22033	25	39009	transcript_HQ_YNMLP_transcript3043/f3p0/3299,transcript_HQ_YNLB_transcript15357/f2p0/1587,transcript_HQ_HBZL_transcript7805/f2p0/2264,transcript_HQ_YNLB_transcript3191/f2p0/3086,transcript_HQ_HBZL_transcript16234/f2p0/1593,transcript_HQ_SCJY_transcript12479/f2p0/1693,transcript_HQ_HBZL_transcript1367/f2p0/3530,transcript_HQ_HBZL_transcript12456/f8p0/1848,transcript_HQ_YNMLP_transcript3425/f2p0/32…
GO:0033866	nucleoside bisphosphate biosynthetic process	biological_process	0.18624	1	17	22033	25	39009	transcript_HQ_YNLB_transcript15357/f2p0/1587,transcript_HQ_YNMLP_transcript3043/f3p0/3299,transcript_HQ_HBZL_transcript12456/f8p0/1848,transcript_HQ_HBZL_transcript1367/f2p0/3530,transcript_HQ_SCJY_transcript12479/f2p0/1693,transcript_HQ_HBZL_transcript16234/f2p0/1593,transcript_HQ_YNLB_transcript3191/f2p0/3086,transcript_HQ_HBZL_transcript7805/f2p0/2264,transcript_HQ_HBZL_transcript2027/f5p0/324…
GO:0034030	ribonucleoside bisphosphate biosynthetic process	biological_process	0.18624	1	17	22033	25	39009	transcript_HQ_YNMLP_transcript3425/f2p0/3232,transcript_HQ_HBZL_transcript2027/f5p0/3244,transcript_HQ_YNLB_transcript2648/f3p0/3228,transcript_HQ_YNMLP_transcript3476/f2p0/3222,transcript_HQ_SCEZ_transcript10998/f9p0/1915,transcript_HQ_HBZL_transcript17425/f3p0/1001,transcript_HQ_HBZL_transcript1409/f2p0/3514,transcript_HQ_YNMLP_transcript17578/f2p0/1517,transcript_HQ_HBZL_transcript1818/f4p0/32…
GO:0034033	purine nucleoside bisphosphate biosynthetic process	biological_process	0.18624	1	17	22033	25	39009	transcript_HQ_YNMLP_transcript3425/f2p0/3232,transcript_HQ_HBZL_transcript2027/f5p0/3244,transcript_HQ_YNMLP_transcript3476/f2p0/3222,transcript_HQ_SCEZ_transcript10998/f9p0/1915,transcript_HQ_YNLB_transcript2648/f3p0/3228,transcript_HQ_HBZL_transcript1818/f4p0/3294,transcript_HQ_YNMLP_transcript17578/f2p0/1517,transcript_HQ_HBZL_transcript17425/f3p0/1001,transcript_HQ_HBZL_transcript1409/f2p0/35…
GO:0006090	pyruvate metabolic process	biological_process	0.18652	1	116	22033	194	39009	transcript_HQ_YNMLP_transcript8320/f2p0/2556,transcript_HQ_YNMLP_transcript18941/f2p0/1336,transcript_HQ_YNMLP_transcript3362/f2p0/3224,transcript_HQ_YNLB_transcript13447/f15p0/1747,transcript_HQ_YNLB_transcript9827/f4p0/2205,transcript_HQ_HBZL_transcript8294/f2p0/2199,transcript_HQ_HBZL_transcript14623/f11p0/1674,transcript_HQ_YNMLP_transcript17965/f2p0/1481,transcript_HQ_YNMLP_transcript8394/f2…
GO:0001539	cilium or flagellum-dependent cell motility	biological_process	0.18658	1	24	22033	37	39009	transcript_HQ_YNLB_transcript900/f2p0/4033,transcript_HQ_HBZL_transcript3487/f2p0/2834,transcript_HQ_YNMLP_transcript18943/f2p0/1329,transcript_HQ_SCEZ_transcript18545/f10p0/1329,transcript_HQ_YNMLP_transcript18693/f2p0/1356,transcript_HQ_YNMLP_transcript25353/f2p0/641,transcript_HQ_YNLB_transcript10319/f3p0/2114,transcript_HQ_SCJY_transcript10344/f2p0/1902,transcript_HQ_YNMLP_transcript19200/f2p…
GO:0097588	archaeal or bacterial-type flagellum-dependent cell motility	biological_process	0.18658	1	24	22033	37	39009	transcript_HQ_YNLB_transcript12216/f2p0/1924,transcript_HQ_YNMLP_transcript19947/f2p0/1219,transcript_HQ_YNMLP_transcript18602/f2p0/1365,transcript_HQ_YNLB_transcript2754/f3p0/3209,transcript_HQ_YNMLP_transcript1148/f2p0/3966,transcript_HQ_YNMLP_transcript1164/f2p0/3965,transcript_HQ_HBZL_transcript20179/f3p0/1258,transcript_HQ_YNMLP_transcript18774/f2p0/1398,transcript_HQ_HBZL_transcript18348/f3…
GO:0004408	holocytochrome-c synthase activity	molecular_function	0.1871	1	3	22033	3	39009	transcript_HQ_YNMLP_transcript3068/f2p0/3316,transcript_HQ_HBZL_transcript22622/f5p0/977,transcript_HQ_YNLB_transcript2514/f4p0/3271
GO:0017048	Rho GTPase binding	molecular_function	0.1874	1	16	22033	23	39009	transcript_HQ_SCJY_transcript8464/f2p0/2185,transcript_HQ_SCEZ_transcript17154/f2p0/1472,transcript_HQ_YNMLP_transcript12526/f2p0/2120,transcript_HQ_YNLB_transcript7791/f3p0/2410,transcript_HQ_YNLB_transcript38/f3p0/7140,transcript_HQ_HBZL_transcript6520/f2p0/2380,transcript_HQ_HBZL_transcript20471/f2p0/1200,transcript_HQ_SCEZ_transcript35/f2p0/6881,transcript_HQ_SCEZ_transcript4655/f2p0/2585,tra…
GO:0022904	respiratory electron transport chain	biological_process	0.18748	1	26	22033	42	39009	transcript_HQ_SCJY_transcript20419/f2p0/724,transcript_HQ_HBZL_transcript24430/f2p0/771,transcript_HQ_HBZL_transcript27068/f2p0/514,transcript_HQ_YNLB_transcript21878/f4p0/739,transcript_HQ_SCJY_transcript19749/f2p0/786,transcript_HQ_HBZL_transcript24787/f4p0/730,transcript_HQ_YNLB_transcript8589/f2p0/2277,transcript_HQ_YNMLP_transcript26326/f4p0/552,transcript_HQ_YNMLP_transcript11767/f4p0/2173,…
GO:0044724	single-organism carbohydrate catabolic process	biological_process	0.18864	1	124	22033	208	39009	transcript_HQ_SCJY_transcript7274/f3p0/2222,transcript_HQ_YNMLP_transcript12747/f7p0/2066,transcript_HQ_YNLB_transcript16847/f2p0/1435,transcript_HQ_HBZL_transcript21040/f31p0/1133,transcript_HQ_HBZL_transcript13611/f2p0/1852,transcript_HQ_HBZL_transcript7455/f2p0/2276,transcript_HQ_HBZL_transcript8289/f28p0/2123,transcript_HQ_SCJY_transcript11724/f4p0/1748,transcript_HQ_HBZL_transcript7430/f2p0/…
GO:0019829	cation-transporting ATPase activity	molecular_function	0.18922	1	23	22033	36	39009	transcript_HQ_HBZL_transcript17534/f3p0/1489,transcript_HQ_SCJY_transcript14508/f2p0/1447,transcript_HQ_HBZL_transcript20959/f6p0/1150,transcript_HQ_HBZL_transcript18332/f5p0/1432,transcript_HQ_YNMLP_transcript17775/f6p0/1482,transcript_HQ_YNLB_transcript18557/f3p0/1142,transcript_HQ_HBZL_transcript18843/f2p0/1372,transcript_HQ_YNMLP_transcript26162/f3p0/568,transcript_HQ_HBZL_transcript5206/f3p0…
GO:0042625	ATPase activity, coupled to transmembrane movement of ions	molecular_function	0.18922	1	23	22033	36	39009	transcript_HQ_YNMLP_transcript26162/f3p0/568,transcript_HQ_HBZL_transcript5206/f3p0/2544,transcript_HQ_YNMLP_transcript19736/f10p0/1240,transcript_HQ_YNMLP_transcript18240/f2p0/1429,transcript_HQ_SCJY_transcript14508/f2p0/1447,transcript_HQ_HBZL_transcript17534/f3p0/1489,transcript_HQ_HBZL_transcript20959/f6p0/1150,transcript_HQ_HBZL_transcript18332/f5p0/1432,transcript_HQ_YNMLP_transcript17775/f…
GO:0044769	ATPase activity, coupled to transmembrane movement of ions, rotational mechanism	molecular_function	0.18922	1	23	22033	36	39009	transcript_HQ_SCJY_transcript17012/f2p0/1077,transcript_HQ_YNMLP_transcript26215/f2p0/566,transcript_HQ_YNMLP_transcript20255/f3p0/1171,transcript_HQ_SCJY_transcript14902/f3p0/1386,transcript_HQ_HBZL_transcript20481/f2p0/1174,transcript_HQ_HBZL_transcript26310/f3p0/595,transcript_HQ_YNLB_transcript15952/f6p0/1519,transcript_HQ_SCJY_transcript15979/f3p0/1224,transcript_HQ_YNMLP_transcript27316/f6p…
GO:0044431	Golgi apparatus part	cellular_component	0.18959	1	137	22033	226	39009	transcript_HQ_SCJY_transcript10488/f2p0/1908,transcript_HQ_YNLB_transcript5032/f2p0/2721,transcript_HQ_YNMLP_transcript15938/f3p0/1783,transcript_HQ_HBZL_transcript84/f4p0/6080,transcript_HQ_YNMLP_transcript138/f2p0/6002,transcript_HQ_YNLB_transcript20989/f2p0/835,transcript_HQ_HBZL_transcript2309/f2p0/3190,transcript_HQ_SCJY_transcript14485/f2p0/1455,transcript_HQ_YNMLP_transcript2823/f4p0/3428,…
GO:0006720	isoprenoid metabolic process	biological_process	0.18981	1	85	22033	141	39009	transcript_HQ_HBZL_transcript21347/f24p0/1071,transcript_HQ_HBZL_transcript4081/f2p0/2721,transcript_HQ_HBZL_transcript13303/f2p0/1791,transcript_HQ_YNMLP_transcript26433/f5p0/541,transcript_HQ_HBZL_transcript21678/f2p0/1076,transcript_HQ_YNLB_transcript15933/f3p0/1515,transcript_HQ_HBZL_transcript18807/f9p0/1372,transcript_HQ_HBZL_transcript13869/f2p0/1754,transcript_HQ_YNMLP_transcript1616/f2p0…
GO:0016817	hydrolase activity, acting on acid anhydrides	molecular_function	0.19025	1	1184	22033	2037	39009	transcript_HQ_YNMLP_transcript17175/f2p0/1572,transcript_HQ_HBZL_transcript3289/f4p0/2882,transcript_HQ_SCJY_transcript7872/f3p0/2160,transcript_HQ_YNMLP_transcript613/f2p0/4607,transcript_HQ_HBZL_transcript2924/f2p0/2978,transcript_HQ_YNMLP_transcript632/f2p0/4443,transcript_HQ_YNLB_transcript2337/f5p0/3404,transcript_HQ_HBZL_transcript22262/f3p0/1017,transcript_HQ_SCEZ_transcript7233/f2p0/2252,…
/f2p0/2272,transcript_HQ_YNLB_transcript1974/f8p0/3472,transcript_HQ_YNLB_transcript9222/f2p0/2232,transcript_HQ_SCEZ_transcript5017/f2p0/2533,transcript_HQ_HBZL_transcript5106/f2p0/2611,transcript_HQ_SCJY_transcript17742/f2p0/993,transcript_HQ_YNMLP_transcript17425/f5p0/1573,transcript_HQ_SCJY_transcript14820/f2p0/1372,transcript_HQ_YNMLP_transcript14027/f2p0/1939,transcript_HQ_HBZL_transcript21…
GO:0009070	serine family amino acid biosynthetic process	biological_process	0.19039	1	13	22033	19	39009	transcript_HQ_SCJY_transcript19155/f2p0/845,transcript_HQ_YNLB_transcript16492/f2p0/1434,transcript_HQ_HBZL_transcript19634/f4p0/1301,transcript_HQ_YNMLP_transcript19265/f5p0/1285,transcript_HQ_HBZL_transcript19461/f8p0/1296,transcript_HQ_HBZL_transcript18230/f2p0/1426,transcript_HQ_HBZL_transcript19050/f3p0/1363,transcript_HQ_HBZL_transcript19946/f5p0/1255,transcript_HQ_HBZL_transcript20460/f2p0…
GO:0019213	deacetylase activity	molecular_function	0.19039	1	3	22033	3	39009	transcript_HQ_HBZL_transcript19277/f2p0/1336,transcript_HQ_HBZL_transcript1962/f12p0/3220,transcript_HQ_HBZL_transcript2173/f5p0/3243
GO:0006119	oxidative phosphorylation	biological_process	0.19044	1	19	22033	30	39009	transcript_HQ_YNMLP_transcript11150/f2p0/2241,transcript_HQ_SCEZ_transcript8169/f5p0/2171,transcript_HQ_YNLB_transcript23363/f4p0/566,transcript_HQ_HBZL_transcript1268/f2p0/3670,transcript_HQ_YNMLP_transcript11206/f2p0/2220,transcript_HQ_YNMLP_transcript25641/f5p0/619,transcript_HQ_YNLB_transcript22721/f9p0/638,transcript_HQ_HBZL_transcript26049/f2p0/618,transcript_HQ_YNLB_transcript23390/f2p0/56…
GO:0042773	ATP synthesis coupled electron transport	biological_process	0.19044	1	19	22033	30	39009	transcript_HQ_HBZL_transcript25201/f16p0/664,transcript_HQ_YNMLP_transcript11767/f4p0/2173,transcript_HQ_HBZL_transcript26524/f2p0/569,transcript_HQ_HBZL_transcript26772/f10p0/542,transcript_HQ_YNLB_transcript23390/f2p0/566,transcript_HQ_HBZL_transcript26049/f2p0/618,transcript_HQ_YNMLP_transcript25641/f5p0/619,transcript_HQ_YNLB_transcript22721/f9p0/638,transcript_HQ_YNMLP_transcript11206/f2p0/2…
GO:0008521	acetyl-CoA transporter activity	molecular_function	0.19088	1	5	22033	6	39009	transcript_HQ_YNMLP_transcript14908/f3p0/1813,transcript_HQ_HBZL_transcript498/f2p0/4267,transcript_HQ_YNMLP_transcript13672/f2p0/1995,transcript_HQ_HBZL_transcript6956/f3p0/2315,transcript_HQ_YNMLP_transcript14035/f3p0/1922
GO:0051185	coenzyme transporter activity	molecular_function	0.19088	1	5	22033	6	39009	transcript_HQ_YNMLP_transcript14908/f3p0/1813,transcript_HQ_HBZL_transcript498/f2p0/4267,transcript_HQ_YNMLP_transcript13672/f2p0/1995,transcript_HQ_HBZL_transcript6956/f3p0/2315,transcript_HQ_YNMLP_transcript14035/f3p0/1922
GO:0006096	glycolytic process	biological_process	0.19107	1	109	22033	182	39009	transcript_HQ_SCJY_transcript11391/f2p0/1807,transcript_HQ_YNLB_transcript18509/f4p0/1155,transcript_HQ_HBZL_transcript10087/f2p0/1914,transcript_HQ_YNMLP_transcript16266/f5p0/1697,transcript_HQ_HBZL_transcript8256/f3p0/2238,transcript_HQ_YNMLP_transcript11873/f2p0/2194,transcript_HQ_HBZL_transcript17372/f4p0/1523,transcript_HQ_HBZL_transcript4377/f2p0/2684,transcript_HQ_YNMLP_transcript23940/f2p…
GO:0006757	ATP generation from ADP	biological_process	0.19107	1	109	22033	182	39009	transcript_HQ_HBZL_transcript9338/f4p0/2104,transcript_HQ_SCJY_transcript7951/f12p0/2157,transcript_HQ_YNMLP_transcript8544/f2p0/2437,transcript_HQ_HBZL_transcript14143/f2p0/1731,transcript_HQ_YNMLP_transcript12232/f2p0/2136,transcript_HQ_HBZL_transcript17187/f3p0/1519,transcript_HQ_YNLB_transcript11641/f7p0/1993,transcript_HQ_HBZL_transcript5437/f5p0/2534,transcript_HQ_YNLB_transcript11699/f3p0/…
GO:0009135	purine nucleoside diphosphate metabolic process	biological_process	0.19107	1	109	22033	182	39009	transcript_HQ_HBZL_transcript10925/f8p0/1970,transcript_HQ_YNMLP_transcript9806/f2p0/2410,transcript_HQ_HBZL_transcript14977/f3p0/1692,transcript_HQ_YNLB_transcript11292/f4p0/2032,transcript_HQ_HBZL_transcript597/f2p0/4136,transcript_HQ_YNLB_transcript10766/f9p0/2048,transcript_HQ_YNMLP_transcript23940/f2p0/781,transcript_HQ_HBZL_transcript4377/f2p0/2684,transcript_HQ_HBZL_transcript17372/f4p0/15…
GO:0009179	purine ribonucleoside diphosphate metabolic process	biological_process	0.19107	1	109	22033	182	39009	transcript_HQ_YNMLP_transcript8544/f2p0/2437,transcript_HQ_HBZL_transcript9338/f4p0/2104,transcript_HQ_SCJY_transcript7951/f12p0/2157,transcript_HQ_HBZL_transcript5437/f5p0/2534,transcript_HQ_YNLB_transcript11699/f3p0/2118,transcript_HQ_HBZL_transcript17187/f3p0/1519,transcript_HQ_YNLB_transcript11641/f7p0/1993,transcript_HQ_YNMLP_transcript12232/f2p0/2136,transcript_HQ_HBZL_transcript14143/f2p0/…
GO:0009185	ribonucleoside diphosphate metabolic process	biological_process	0.19107	1	109	22033	182	39009	transcript_HQ_SCJY_transcript16252/f3p0/1197,transcript_HQ_YNLB_transcript9824/f2p0/2132,transcript_HQ_HBZL_transcript9510/f3p0/2101,transcript_HQ_YNLB_transcript14603/f2p0/1686,transcript_HQ_YNLB_transcript5383/f3p0/2677,transcript_HQ_HBZL_transcript17829/f11p0/1457,transcript_HQ_SCJY_transcript7861/f7p0/2175,transcript_HQ_YNLB_transcript10072/f4p0/2175,transcript_HQ_YNMLP_transcript17965/f2p0/1…
GO:0046031	ADP metabolic process	biological_process	0.19107	1	109	22033	182	39009	transcript_HQ_YNMLP_transcript18284/f3p0/1416,transcript_HQ_SCJY_transcript15787/f5p0/1240,transcript_HQ_HBZL_transcript9484/f10p0/2083,transcript_HQ_YNLB_transcript10095/f2p0/2235,transcript_HQ_HBZL_transcript17987/f17p0/1443,transcript_HQ_HBZL_transcript13345/f2p0/1803,transcript_HQ_YNMLP_transcript11521/f5p0/2214,transcript_HQ_YNMLP_transcript7845/f3p0/2580,transcript_HQ_HBZL_transcript7031/f4…
GO:0008272	sulfate transport	biological_process	0.19142	1	23	22033	35	39009	transcript_HQ_SCJY_transcript3806/f2p0/2662,transcript_HQ_YNLB_transcript7736/f3p0/2407,transcript_HQ_HBZL_transcript6352/f142p0/2305,transcript_HQ_YNMLP_transcript8726/f2p0/2497,transcript_HQ_HBZL_transcript4110/f2p0/2720,transcript_HQ_SCJY_transcript4020/f8p0/2624,transcript_HQ_YNLB_transcript8103/f2p0/2361,transcript_HQ_YNLB_transcript8675/f2p0/2309,transcript_HQ_HBZL_transcript4846/f24p0/2507…
GO:0015116	sulfate transmembrane transporter activity	molecular_function	0.19142	1	23	22033	35	39009	transcript_HQ_YNLB_transcript8103/f2p0/2361,transcript_HQ_YNLB_transcript8675/f2p0/2309,transcript_HQ_HBZL_transcript4846/f24p0/2507,transcript_HQ_SCJY_transcript6566/f2p0/2289,transcript_HQ_YNMLP_transcript5363/f2p0/2897,transcript_HQ_SCJY_transcript3906/f2p0/2637,transcript_HQ_HBZL_transcript6298/f3p0/2392,transcript_HQ_YNLB_transcript7736/f3p0/2407,transcript_HQ_SCJY_transcript3806/f2p0/2662,t…
GO:0072348	sulfur compound transport	biological_process	0.19142	1	23	22033	35	39009	transcript_HQ_YNMLP_transcript6304/f5p0/2763,transcript_HQ_YNMLP_transcript9581/f2p0/2409,transcript_HQ_HBZL_transcript6725/f4p0/2353,transcript_HQ_HBZL_transcript1557/f2p0/3408,transcript_HQ_SCJY_transcript4627/f2p0/2582,transcript_HQ_HBZL_transcript6155/f5p0/2416,transcript_HQ_SCJY_transcript4593/f4p0/2498,transcript_HQ_SCEZ_transcript3821/f2p0/2730,transcript_HQ_SCJY_transcript5092/f2p0/2494,t…
GO:1901682	sulfur compound transmembrane transporter activity	molecular_function	0.19142	1	23	22033	35	39009	transcript_HQ_YNMLP_transcript9581/f2p0/2409,transcript_HQ_SCJY_transcript4627/f2p0/2582,transcript_HQ_HBZL_transcript1557/f2p0/3408,transcript_HQ_HBZL_transcript6725/f4p0/2353,transcript_HQ_YNMLP_transcript6304/f5p0/2763,transcript_HQ_SCJY_transcript4593/f4p0/2498,transcript_HQ_SCEZ_transcript3821/f2p0/2730,transcript_HQ_HBZL_transcript8009/f12p0/2222,transcript_HQ_SCJY_transcript5092/f2p0/2494,…
GO:0046148	pigment biosynthetic process	biological_process	0.19196	1	74	22033	121	39009	transcript_HQ_YNMLP_transcript1194/f2p0/3932,transcript_HQ_SCJY_transcript11082/f2p0/1837,transcript_HQ_HBZL_transcript10887/f2p0/1971,transcript_HQ_HBZL_transcript17039/f23p0/1528,transcript_HQ_HBZL_transcript9683/f4p0/2046,transcript_HQ_HBZL_transcript21112/f3p0/1139,transcript_HQ_HBZL_transcript8311/f8p0/2193,transcript_HQ_HBZL_transcript15/f2p0/7382,transcript_HQ_HBZL_transcript19279/f5p0/132…
GO:0009308	amine metabolic process	biological_process	0.19348	1	119	22033	199	39009	transcript_HQ_HBZL_transcript15568/f2p0/1632,transcript_HQ_YNLB_transcript19237/f5p0/1117,transcript_HQ_HBZL_transcript2249/f6p0/3207,transcript_HQ_YNMLP_transcript20539/f9p0/1152,transcript_HQ_YNLB_transcript18995/f4p0/1019,transcript_HQ_HBZL_transcript22253/f2p0/1032,transcript_HQ_SCJY_transcript16677/f2p0/1118,transcript_HQ_HBZL_transcript21359/f5p0/1115,transcript_HQ_HBZL_transcript21767/f2p0…
GO:0016758	transferase activity, transferring hexosyl groups	molecular_function	0.19406	1	399	22033	681	39009	transcript_HQ_HBZL_transcript9732/f3p0/2064,transcript_HQ_YNLB_transcript14925/f7p0/1646,transcript_HQ_YNMLP_transcript15524/f2p0/1750,transcript_HQ_YNMLP_transcript1770/f7p0/3689,transcript_HQ_YNMLP_transcript1151/f2p0/3962,transcript_HQ_SCJY_transcript2305/f2p0/2963,transcript_HQ_HBZL_transcript15833/f2p0/1636,transcript_HQ_HBZL_transcript809/f8p0/3916,transcript_HQ_YNMLP_transcript11612/f2p0/2…
GO:0019028	viral capsid	cellular_component	0.1944	1	137	22033	231	39009	transcript_HQ_HBZL_transcript22991/f4p0/918,transcript_HQ_YNMLP_transcript7879/f3p0/2588,transcript_HQ_YNMLP_transcript6069/f2p0/2797,transcript_HQ_SCEZ_transcript4655/f2p0/2585,transcript_HQ_HBZL_transcript9331/f2p0/2112,transcript_HQ_SCJY_transcript9048/f2p0/2055,transcript_HQ_HBZL_transcript22696/f3p0/964,transcript_HQ_HBZL_transcript8030/f3p0/2182,transcript_HQ_HBZL_transcript8959/f2p0/2142,t…
GO:0002694	regulation of leukocyte activation	biological_process	0.19465	1	7	22033	9	39009	transcript_HQ_YNMLP_transcript3900/f2p0/3188,transcript_HQ_YNMLP_transcript2061/f2p0/3695,transcript_HQ_SCJY_transcript1205/f3p0/3379,transcript_HQ_HBZL_transcript3485/f6p0/2870,transcript_HQ_YNMLP_transcript6874/f2p0/2772,transcript_HQ_YNMLP_transcript2932/f3p0/3339,transcript_HQ_HBZL_transcript8259/f2p0/2191
GO:0050865	regulation of cell activation	biological_process	0.19465	1	7	22033	9	39009	transcript_HQ_YNMLP_transcript2932/f3p0/3339,transcript_HQ_HBZL_transcript8259/f2p0/2191,transcript_HQ_SCJY_transcript1205/f3p0/3379,transcript_HQ_YNMLP_transcript2061/f2p0/3695,transcript_HQ_YNMLP_transcript3900/f2p0/3188,transcript_HQ_YNMLP_transcript6874/f2p0/2772,transcript_HQ_HBZL_transcript3485/f6p0/2870
GO:0051249	regulation of lymphocyte activation	biological_process	0.19465	1	7	22033	9	39009	transcript_HQ_YNMLP_transcript6874/f2p0/2772,transcript_HQ_HBZL_transcript3485/f6p0/2870,transcript_HQ_SCJY_transcript1205/f3p0/3379,transcript_HQ_YNMLP_transcript2061/f2p0/3695,transcript_HQ_YNMLP_transcript3900/f2p0/3188,transcript_HQ_HBZL_transcript8259/f2p0/2191,transcript_HQ_YNMLP_transcript2932/f3p0/3339
GO:0006733	oxidoreduction coenzyme metabolic process	biological_process	0.19465	1	161	22033	272	39009	transcript_HQ_SCJY_transcript7951/f12p0/2157,transcript_HQ_SCJY_transcript15244/f13p0/1305,transcript_HQ_HBZL_transcript2672/f2p0/3046,transcript_HQ_YNMLP_transcript12232/f2p0/2136,transcript_HQ_YNLB_transcript11641/f7p0/1993,transcript_HQ_YNLB_transcript4880/f6p0/2749,transcript_HQ_HBZL_transcript10614/f6p0/2029,transcript_HQ_HBZL_transcript10200/f2p0/2028,transcript_HQ_SCJY_transcript11724/f4p0…
GO:0051239	regulation of multicellular organismal process	biological_process	0.19509	1	10	22033	14	39009	transcript_HQ_YNLB_transcript7182/f2p0/2458,transcript_HQ_YNMLP_transcript13151/f2p0/2029,transcript_HQ_YNMLP_transcript21184/f4p0/1073,transcript_HQ_YNLB_transcript15594/f12p0/1560,transcript_HQ_YNMLP_transcript11550/f2p0/2225,transcript_HQ_YNLB_transcript11718/f2p0/1974,transcript_HQ_YNLB_transcript10438/f6p0/2100,transcript_HQ_YNMLP_transcript1244/f2p0/3929,transcript_HQ_SCEZ_transcript22019/f…
GO:0010564	regulation of cell cycle process	biological_process	0.19542	1	28	22033	44	39009	transcript_HQ_HBZL_transcript27988/f22p0/355,transcript_HQ_YNLB_transcript21530/f2p0/764,transcript_HQ_YNMLP_transcript17903/f2p0/1497,transcript_HQ_HBZL_transcript1400/f2p0/3502,transcript_HQ_SCEZ_transcript15437/f2p0/1621,transcript_HQ_YNMLP_transcript18728/f2p0/1363,transcript_HQ_YNMLP_transcript1108/f2p0/4014,transcript_HQ_YNLB_transcript18947/f2p0/1046,transcript_HQ_YNMLP_transcript526/f2p0/…
GO:0007126	meiotic nuclear division	biological_process	0.19551	1	13	22033	19	39009	transcript_HQ_HBZL_transcript24035/f3p0/823,transcript_HQ_HBZL_transcript10668/f6p0/1987,transcript_HQ_YNMLP_transcript19385/f16p0/1250,transcript_HQ_SCJY_transcript15880/f2p0/1230,transcript_HQ_YNMLP_transcript18255/f3p0/1406,transcript_HQ_HBZL_transcript20304/f13p0/1230,transcript_HQ_SCEZ_transcript10832/f6p0/1940,transcript_HQ_YNLB_transcript837/f3p0/4104,transcript_HQ_YNLB_transcript16043/f4p…
GO:1903046	meiotic cell cycle process	biological_process	0.19551	1	13	22033	19	39009	transcript_HQ_YNMLP_transcript19385/f16p0/1250,transcript_HQ_HBZL_transcript24035/f3p0/823,transcript_HQ_HBZL_transcript10668/f6p0/1987,transcript_HQ_SCEZ_transcript10832/f6p0/1940,transcript_HQ_HBZL_transcript20304/f13p0/1230,transcript_HQ_YNMLP_transcript18255/f3p0/1406,transcript_HQ_SCJY_transcript15880/f2p0/1230,transcript_HQ_HBZL_transcript11665/f4p0/1910,transcript_HQ_YNLB_transcript837/f3p…
GO:0044461	bacterial-type flagellum part	cellular_component	0.19573	1	13	22033	19	39009	transcript_HQ_YNMLP_transcript19200/f2p0/1255,transcript_HQ_YNLB_transcript2754/f3p0/3209,transcript_HQ_SCJY_transcript14247/f3p0/1461,transcript_HQ_HBZL_transcript12102/f3p0/1884,transcript_HQ_YNLB_transcript14964/f2p0/1652,transcript_HQ_HBZL_transcript5092/f2p0/2564,transcript_HQ_HBZL_transcript20179/f3p0/1258,transcript_HQ_YNMLP_transcript20954/f3p0/1086,transcript_HQ_SCEZ_transcript18545/f10p…
GO:0004832	valine-tRNA ligase activity	molecular_function	0.19603	1	10	22033	14	39009	transcript_HQ_SCJY_transcript725/f3p0/3598,transcript_HQ_SCEZ_transcript19204/f2p0/1270,transcript_HQ_HBZL_transcript23402/f2p0/880,transcript_HQ_SCJY_transcript14866/f2p0/1392,transcript_HQ_HBZL_transcript21108/f2p0/1136,transcript_HQ_YNMLP_transcript1864/f5p0/3667,transcript_HQ_HBZL_transcript19668/f2p0/1292,transcript_HQ_HBZL_transcript18901/f6p0/1376,transcript_HQ_HBZL_transcript1070/f2p0/371…
GO:0006438	valyl-tRNA aminoacylation	biological_process	0.19603	1	10	22033	14	39009	transcript_HQ_HBZL_transcript21108/f2p0/1136,transcript_HQ_SCJY_transcript14866/f2p0/1392,transcript_HQ_SCEZ_transcript19204/f2p0/1270,transcript_HQ_HBZL_transcript23402/f2p0/880,transcript_HQ_HBZL_transcript19668/f2p0/1292,transcript_HQ_YNMLP_transcript1864/f5p0/3667,transcript_HQ_SCJY_transcript725/f3p0/3598,transcript_HQ_HBZL_transcript1070/f2p0/3717,transcript_HQ_SCEZ_transcript19286/f3p0/128…
GO:0015035	protein disulfide oxidoreductase activity	molecular_function	0.19625	1	98	22033	167	39009	transcript_HQ_YNMLP_transcript23098/f2p0/894,transcript_HQ_YNMLP_transcript22539/f2p0/929,transcript_HQ_HBZL_transcript10411/f2p0/2007,transcript_HQ_HBZL_transcript23360/f2p0/891,transcript_HQ_YNLB_transcript22951/f7p0/622,transcript_HQ_SCJY_transcript17419/f27p0/1029,transcript_HQ_HBZL_transcript25162/f15p0/697,transcript_HQ_HBZL_transcript25755/f14p0/622,transcript_HQ_YNMLP_transcript13926/f3p0…
GO:0015036	disulfide oxidoreductase activity	molecular_function	0.19625	1	98	22033	167	39009	transcript_HQ_YNLB_transcript4111/f2p0/2878,transcript_HQ_YNMLP_transcript7509/f2p0/2631,transcript_HQ_HBZL_transcript16132/f2p0/1589,transcript_HQ_YNLB_transcript20040/f4p0/953,transcript_HQ_SCJY_transcript13580/f2p0/1590,transcript_HQ_YNMLP_transcript6191/f2p0/2764,transcript_HQ_HBZL_transcript24545/f2p0/747,transcript_HQ_YNMLP_transcript12911/f3p0/2053,transcript_HQ_SCEZ_transcript2460/f2p0/30…
GO:0005635	nuclear envelope	cellular_component	0.19634	1	25	22033	38	39009	transcript_HQ_YNLB_transcript3108/f2p0/3090,transcript_HQ_YNLB_transcript6417/f2p0/2557,transcript_HQ_HBZL_transcript13335/f7p0/1793,transcript_HQ_YNMLP_transcript2354/f6p0/3513,transcript_HQ_HBZL_transcript7275/f2p0/2313,transcript_HQ_YNMLP_transcript2801/f2p0/3367,transcript_HQ_SCJY_transcript9804/f2p0/1965,transcript_HQ_SCJY_transcript11800/f2p0/1787,transcript_HQ_YNMLP_transcript2741/f4p0/338…
GO:0005643	nuclear pore	cellular_component	0.19634	1	25	22033	38	39009	transcript_HQ_HBZL_transcript11880/f2p0/1913,transcript_HQ_HBZL_transcript1572/f4p0/3440,transcript_HQ_SCJY_transcript542/f3p0/3747,transcript_HQ_YNMLP_transcript13829/f5p0/1955,transcript_HQ_YNMLP_transcript15106/f3p0/1821,transcript_HQ_SCJY_transcript12432/f3p0/1679,transcript_HQ_YNMLP_transcript3704/f2p0/3157,transcript_HQ_YNLB_transcript6270/f2p0/2573,transcript_HQ_HBZL_transcript13335/f7p0/1…
GO:0032507	maintenance of protein location in cell	biological_process	0.19678	1	27	22033	42	39009	transcript_HQ_YNLB_transcript19166/f3p0/1084,transcript_HQ_YNMLP_transcript264/f2p0/5246,transcript_HQ_YNLB_transcript18854/f3p0/1116,transcript_HQ_YNLB_transcript9733/f2p0/2183,transcript_HQ_HBZL_transcript7795/f9p0/2239,transcript_HQ_HBZL_transcript5265/f2p0/2544,transcript_HQ_HBZL_transcript20820/f2p0/1167,transcript_HQ_YNLB_transcript16597/f3p0/1427,transcript_HQ_HBZL_transcript22170/f3p0/107…
GO:0045185	maintenance of protein location	biological_process	0.19678	1	27	22033	42	39009	transcript_HQ_HBZL_transcript21046/f6p0/1142,transcript_HQ_HBZL_transcript20820/f2p0/1167,transcript_HQ_YNLB_transcript16597/f3p0/1427,transcript_HQ_HBZL_transcript22170/f3p0/1070,transcript_HQ_HBZL_transcript7795/f9p0/2239,transcript_HQ_HBZL_transcript5265/f2p0/2544,transcript_HQ_YNLB_transcript9733/f2p0/2183,transcript_HQ_YNLB_transcript18854/f3p0/1116,transcript_HQ_YNMLP_transcript264/f2p0/524…
GO:0051651	maintenance of location in cell	biological_process	0.19678	1	27	22033	42	39009	transcript_HQ_YNLB_transcript9733/f2p0/2183,transcript_HQ_HBZL_transcript7795/f9p0/2239,transcript_HQ_HBZL_transcript5265/f2p0/2544,transcript_HQ_YNLB_transcript16597/f3p0/1427,transcript_HQ_HBZL_transcript20820/f2p0/1167,transcript_HQ_HBZL_transcript22170/f3p0/1070,transcript_HQ_HBZL_transcript21046/f6p0/1142,transcript_HQ_YNLB_transcript19166/f3p0/1084,transcript_HQ_YNMLP_transcript264/f2p0/524…
GO:0008374	O-acyltransferase activity	molecular_function	0.19732	1	56	22033	91	39009	transcript_HQ_YNLB_transcript2047/f2p0/3420,transcript_HQ_YNMLP_transcript16197/f2p0/1668,transcript_HQ_YNMLP_transcript5421/f2p0/2872,transcript_HQ_HBZL_transcript10004/f2p0/2042,transcript_HQ_HBZL_transcript19946/f5p0/1255,transcript_HQ_HBZL_transcript5530/f13p0/2518,transcript_HQ_YNLB_transcript5491/f3p0/2657,transcript_HQ_HBZL_transcript9010/f3p0/2101,transcript_HQ_YNMLP_transcript2180/f2p0/3…
GO:0006816	calcium ion transport	biological_process	0.19743	1	20	22033	30	39009	transcript_HQ_HBZL_transcript3130/f6p0/2874,transcript_HQ_HBZL_transcript3357/f3p0/2875,transcript_HQ_SCJY_transcript12706/f2p0/1654,transcript_HQ_HBZL_transcript18627/f2p0/1382,transcript_HQ_YNMLP_transcript7799/f3p0/2688,transcript_HQ_YNMLP_transcript8193/f2p0/2554,transcript_HQ_HBZL_transcript4806/f11p0/2627,transcript_HQ_SCJY_transcript2012/f2p0/3042,transcript_HQ_YNLB_transcript2422/f2p0/331…
GO:0008033	tRNA processing	biological_process	0.19788	1	367	22033	627	39009	transcript_HQ_YNMLP_transcript1074/f2p0/4010,transcript_HQ_HBZL_transcript19944/f2p0/1257,transcript_HQ_HBZL_transcript6069/f5p0/2463,transcript_HQ_YNLB_transcript4573/f2p0/2852,transcript_HQ_HBZL_transcript16917/f7p0/1580,transcript_HQ_YNLB_transcript10690/f4p0/2058,transcript_HQ_HBZL_transcript4469/f3p0/2665,transcript_HQ_YNLB_transcript16061/f2p0/1501,transcript_HQ_YNLB_transcript2416/f2p0/329…
GO:0000152	nuclear ubiquitin ligase complex	cellular_component	0.19867	1	288	22033	494	39009	transcript_HQ_YNLB_transcript17860/f2p0/1225,transcript_HQ_HBZL_transcript25768/f3p0/636,transcript_HQ_HBZL_transcript14148/f6p0/1766,transcript_HQ_HBZL_transcript6933/f6p0/2328,transcript_HQ_HBZL_transcript3601/f2p0/2822,transcript_HQ_SCJY_transcript13334/f2p0/1581,transcript_HQ_HBZL_transcript4594/f2p0/2663,transcript_HQ_YNMLP_transcript23782/f2p0/797,transcript_HQ_YNLB_transcript3634/f5p0/2977…
GO:0005680	anaphase-promoting complex	cellular_component	0.19867	1	288	22033	494	39009	transcript_HQ_YNLB_transcript7994/f2p0/2424,transcript_HQ_SCJY_transcript3361/f7p0/2665,transcript_HQ_HBZL_transcript30/f3p0/6883,transcript_HQ_HBZL_transcript9185/f3p0/2103,transcript_HQ_YNMLP_transcript526/f2p0/4518,transcript_HQ_YNLB_transcript11327/f2p0/2006,transcript_HQ_YNLB_transcript16069/f2p0/1512,transcript_HQ_HBZL_transcript20613/f3p0/1210,transcript_HQ_HBZL_transcript18237/f11p0/1402,…
GO:0031461	cullin-RING ubiquitin ligase complex	cellular_component	0.19867	1	288	22033	494	39009	transcript_HQ_SCJY_transcript13334/f2p0/1581,transcript_HQ_HBZL_transcript4594/f2p0/2663,transcript_HQ_YNMLP_transcript23782/f2p0/797,transcript_HQ_YNLB_transcript3634/f5p0/2977,transcript_HQ_YNMLP_transcript15897/f2p0/1727,transcript_HQ_HBZL_transcript22695/f3p0/966,transcript_HQ_HBZL_transcript827/f2p0/3886,transcript_HQ_HBZL_transcript4588/f6p0/2591,transcript_HQ_YNLB_transcript17860/f2p0/1225…
GO:0008138	protein tyrosine/serine/threonine phosphatase activity	molecular_function	0.19913	1	49	22033	79	39009	transcript_HQ_SCEZ_transcript2118/f2p0/3151,transcript_HQ_HBZL_transcript22311/f2p0/1006,transcript_HQ_YNMLP_transcript6560/f2p0/2737,transcript_HQ_HBZL_transcript12036/f5p0/1887,transcript_HQ_HBZL_transcript14846/f9p0/1705,transcript_HQ_SCEZ_transcript17096/f2p0/1469,transcript_HQ_HBZL_transcript10556/f2p0/1502,transcript_HQ_HBZL_transcript6858/f2p0/2336,transcript_HQ_HBZL_transcript4722/f3p0/26…
GO:0008121	ubiquinol-cytochrome-c reductase activity	molecular_function	0.19927	1	12	22033	18	39009	transcript_HQ_YNMLP_transcript299/f3p0/5208,transcript_HQ_SCJY_transcript21931/f4p0/583,transcript_HQ_YNMLP_transcript26877/f10p0/518,transcript_HQ_HBZL_transcript19752/f2p0/1279,transcript_HQ_HBZL_transcript26545/f4p0/564,transcript_HQ_YNLB_transcript17661/f12p0/1286,transcript_HQ_YNLB_transcript17375/f5p0/1298,transcript_HQ_SCJY_transcript21905/f11p0/577,transcript_HQ_YNMLP_transcript20016/f2p0…
GO:0016681	oxidoreductase activity, acting on diphenols and related substances as donors, cytochrome as acceptor	molecular_function	0.19927	1	12	22033	18	39009	transcript_HQ_HBZL_transcript26545/f4p0/564,transcript_HQ_HBZL_transcript19752/f2p0/1279,transcript_HQ_YNMLP_transcript299/f3p0/5208,transcript_HQ_SCJY_transcript21931/f4p0/583,transcript_HQ_YNMLP_transcript26877/f10p0/518,transcript_HQ_YNMLP_transcript20016/f2p0/1201,transcript_HQ_HBZL_transcript26495/f4p0/569,transcript_HQ_SCJY_transcript21905/f11p0/577,transcript_HQ_YNLB_transcript17661/f12p0/…
GO:0008061	chitin binding	molecular_function	0.19955	1	17	22033	26	39009	transcript_HQ_HBZL_transcript9471/f3p0/2081,transcript_HQ_HBZL_transcript21309/f3p0/1136,transcript_HQ_YNLB_transcript18014/f5p0/1214,transcript_HQ_YNMLP_transcript20502/f7p0/1144,transcript_HQ_HBZL_transcript26845/f7p0/528,transcript_HQ_HBZL_transcript15446/f2p0/1647,transcript_HQ_HBZL_transcript22158/f6p0/1019,transcript_HQ_HBZL_transcript20507/f3p0/1209,transcript_HQ_YNLB_transcript18062/f2p0/…
GO:0016849	phosphorus-oxygen lyase activity	molecular_function	0.20001	1	20	22033	31	39009	transcript_HQ_YNMLP_transcript23645/f3p0/832,transcript_HQ_YNLB_transcript16574/f2p0/1428,transcript_HQ_HBZL_transcript13490/f2p0/1774,transcript_HQ_YNMLP_transcript21689/f2p0/1011,transcript_HQ_SCEZ_transcript23678/f5p0/794,transcript_HQ_HBZL_transcript13041/f2p0/1822,transcript_HQ_YNLB_transcript18991/f5p0/1080,transcript_HQ_YNMLP_transcript23042/f4p0/829,transcript_HQ_HBZL_transcript3295/f6p0/…
GO:0019013	viral nucleocapsid	cellular_component	0.20128	1	19	22033	29	39009	transcript_HQ_HBZL_transcript9009/f5p0/2119,transcript_HQ_HBZL_transcript10142/f2p0/2156,transcript_HQ_YNMLP_transcript4400/f2p0/3047,transcript_HQ_HBZL_transcript11886/f23p0/1922,transcript_HQ_YNLB_transcript10774/f4p0/2089,transcript_HQ_HBZL_transcript4710/f2p0/2628,transcript_HQ_YNLB_transcript14941/f7p0/1610,transcript_HQ_HBZL_transcript15977/f2p0/1651,transcript_HQ_YNMLP_transcript27259/f2p0…
GO:0007088	regulation of mitotic nuclear division	biological_process	0.20338	1	25	22033	39	39009	transcript_HQ_SCJY_transcript15259/f2p0/1301,transcript_HQ_YNMLP_transcript526/f2p0/4518,transcript_HQ_YNLB_transcript48/f2p0/6942,transcript_HQ_YNMLP_transcript1108/f2p0/4014,transcript_HQ_YNLB_transcript18947/f2p0/1046,transcript_HQ_YNMLP_transcript18176/f2p0/1423,transcript_HQ_HBZL_transcript5855/f2p0/2521,transcript_HQ_SCEZ_transcript19783/f4p0/1209,transcript_HQ_HBZL_transcript30/f3p0/6883,t…
GO:0044770	cell cycle phase transition	biological_process	0.20338	1	25	22033	39	39009	transcript_HQ_HBZL_transcript21704/f2p0/1070,transcript_HQ_HBZL_transcript7062/f2p0/2323,transcript_HQ_YNLB_transcript17860/f2p0/1225,transcript_HQ_SCJY_transcript10115/f5p0/1922,transcript_HQ_HBZL_transcript3113/f7p0/2949,transcript_HQ_HBZL_transcript2408/f2p0/3157,transcript_HQ_YNLB_transcript9600/f4p0/2205,transcript_HQ_SCJY_transcript19801/f2p0/788,transcript_HQ_HBZL_transcript21/f2p0/7062,tr…
GO:0044772	mitotic cell cycle phase transition	biological_process	0.20338	1	25	22033	39	39009	transcript_HQ_SCJY_transcript10115/f5p0/1922,transcript_HQ_YNLB_transcript17860/f2p0/1225,transcript_HQ_HBZL_transcript7062/f2p0/2323,transcript_HQ_HBZL_transcript21704/f2p0/1070,transcript_HQ_HBZL_transcript3113/f7p0/2949,transcript_HQ_HBZL_transcript2408/f2p0/3157,transcript_HQ_HBZL_transcript21/f2p0/7062,transcript_HQ_YNLB_transcript9600/f4p0/2205,transcript_HQ_SCJY_transcript19801/f2p0/788,tr…
GO:0051783	regulation of nuclear division	biological_process	0.20338	1	25	22033	39	39009	transcript_HQ_HBZL_transcript21704/f2p0/1070,transcript_HQ_YNLB_transcript17860/f2p0/1225,transcript_HQ_HBZL_transcript7062/f2p0/2323,transcript_HQ_SCJY_transcript10115/f5p0/1922,transcript_HQ_HBZL_transcript3113/f7p0/2949,transcript_HQ_HBZL_transcript2408/f2p0/3157,transcript_HQ_SCJY_transcript19801/f2p0/788,transcript_HQ_YNLB_transcript9600/f4p0/2205,transcript_HQ_HBZL_transcript21/f2p0/7062,tr…
GO:1901987	regulation of cell cycle phase transition	biological_process	0.20338	1	25	22033	39	39009	transcript_HQ_YNLB_transcript48/f2p0/6942,transcript_HQ_YNMLP_transcript526/f2p0/4518,transcript_HQ_SCJY_transcript15259/f2p0/1301,transcript_HQ_YNLB_transcript18947/f2p0/1046,transcript_HQ_YNMLP_transcript1108/f2p0/4014,transcript_HQ_HBZL_transcript30/f3p0/6883,transcript_HQ_SCEZ_transcript19783/f4p0/1209,transcript_HQ_YNMLP_transcript18176/f2p0/1423,transcript_HQ_HBZL_transcript5855/f2p0/2521,t…
GO:1901990	regulation of mitotic cell cycle phase transition	biological_process	0.20338	1	25	22033	39	39009	transcript_HQ_HBZL_transcript2408/f2p0/3157,transcript_HQ_HBZL_transcript3113/f7p0/2949,transcript_HQ_YNLB_transcript16022/f3p0/1517,transcript_HQ_HBZL_transcript27398/f4p0/493,transcript_HQ_HBZL_transcript21/f2p0/7062,transcript_HQ_SCJY_transcript19801/f2p0/788,transcript_HQ_YNLB_transcript9600/f4p0/2205,transcript_HQ_YNLB_transcript17860/f2p0/1225,transcript_HQ_SCJY_transcript10115/f5p0/1922,tr…
GO:0000148	1,3-beta-D-glucan synthase complex	cellular_component	0.20406	1	19	22033	27	39009	transcript_HQ_YNLB_transcript2719/f2p0/3202,transcript_HQ_YNMLP_transcript1656/f2p0/3750,transcript_HQ_YNLB_transcript606/f2p0/4396,transcript_HQ_HBZL_transcript630/f2p0/4089,transcript_HQ_HBZL_transcript55/f5p0/6441,transcript_HQ_YNMLP_transcript1325/f2p0/3872,transcript_HQ_YNMLP_transcript9255/f2p0/2498,transcript_HQ_YNLB_transcript58/f3p0/6624,transcript_HQ_SCEZ_transcript68/f2p0/6210,transcri…
GO:0003843	1,3-beta-D-glucan synthase activity	molecular_function	0.20406	1	19	22033	27	39009	transcript_HQ_YNLB_transcript58/f3p0/6624,transcript_HQ_YNMLP_transcript9255/f2p0/2498,transcript_HQ_SCEZ_transcript68/f2p0/6210,transcript_HQ_HBZL_transcript55/f5p0/6441,transcript_HQ_HBZL_transcript630/f2p0/4089,transcript_HQ_YNMLP_transcript1325/f2p0/3872,transcript_HQ_YNLB_transcript606/f2p0/4396,transcript_HQ_YNMLP_transcript1656/f2p0/3750,transcript_HQ_YNLB_transcript2719/f2p0/3202,transcri…
GO:0006074	(1->3)-beta-D-glucan metabolic process	biological_process	0.20406	1	19	22033	27	39009	transcript_HQ_SCEZ_transcript68/f2p0/6210,transcript_HQ_YNLB_transcript58/f3p0/6624,transcript_HQ_YNMLP_transcript9255/f2p0/2498,transcript_HQ_YNMLP_transcript1325/f2p0/3872,transcript_HQ_HBZL_transcript55/f5p0/6441,transcript_HQ_HBZL_transcript630/f2p0/4089,transcript_HQ_YNMLP_transcript1656/f2p0/3750,transcript_HQ_YNLB_transcript606/f2p0/4396,transcript_HQ_YNLB_transcript2719/f2p0/3202,transcri…
GO:0006075	(1->3)-beta-D-glucan biosynthetic process	biological_process	0.20406	1	19	22033	27	39009	transcript_HQ_SCEZ_transcript68/f2p0/6210,transcript_HQ_YNLB_transcript58/f3p0/6624,transcript_HQ_YNMLP_transcript9255/f2p0/2498,transcript_HQ_YNMLP_transcript1325/f2p0/3872,transcript_HQ_HBZL_transcript55/f5p0/6441,transcript_HQ_HBZL_transcript630/f2p0/4089,transcript_HQ_YNMLP_transcript1656/f2p0/3750,transcript_HQ_YNLB_transcript606/f2p0/4396,transcript_HQ_YNLB_transcript2719/f2p0/3202,transcri…
GO:0022884	macromolecule transmembrane transporter activity	molecular_function	0.20482	1	44	22033	73	39009	transcript_HQ_YNLB_transcript15968/f2p0/1522,transcript_HQ_YNLB_transcript20522/f2p0/884,transcript_HQ_YNLB_transcript19435/f9p0/1029,transcript_HQ_HBZL_transcript24495/f17p0/713,transcript_HQ_HBZL_transcript25798/f2p0/663,transcript_HQ_YNMLP_transcript26041/f2p0/577,transcript_HQ_YNLB_transcript19939/f17p0/962,transcript_HQ_YNLB_transcript11904/f9p0/1952,transcript_HQ_HBZL_transcript23213/f14p0/…
GO:0009878	nodule morphogenesis	biological_process	0.20507	1	4	22033	5	39009	transcript_HQ_YNMLP_transcript27972/f2p0/343,transcript_HQ_YNLB_transcript23176/f2p0/599,transcript_HQ_HBZL_transcript26641/f2p0/552,transcript_HQ_SCJY_transcript23557/f182p0/402
GO:0009886	post-embryonic morphogenesis	biological_process	0.20507	1	4	22033	5	39009	transcript_HQ_SCJY_transcript23557/f182p0/402,transcript_HQ_HBZL_transcript26641/f2p0/552,transcript_HQ_YNMLP_transcript27972/f2p0/343,transcript_HQ_YNLB_transcript23176/f2p0/599
GO:0044111	development involved in symbiotic interaction	biological_process	0.20507	1	4	22033	5	39009	transcript_HQ_YNLB_transcript23176/f2p0/599,transcript_HQ_YNMLP_transcript27972/f2p0/343,transcript_HQ_SCJY_transcript23557/f182p0/402,transcript_HQ_HBZL_transcript26641/f2p0/552
GO:0006400	tRNA modification	biological_process	0.20524	1	215	22033	364	39009	transcript_HQ_YNMLP_transcript18407/f8p0/1406,transcript_HQ_YNMLP_transcript20699/f3p0/1132,transcript_HQ_YNMLP_transcript1187/f2p0/3950,transcript_HQ_HBZL_transcript14424/f5p0/1719,transcript_HQ_SCJY_transcript8113/f3p0/2060,transcript_HQ_SCJY_transcript1517/f8p0/3212,transcript_HQ_HBZL_transcript14475/f3p0/1711,transcript_HQ_HBZL_transcript703/f3p0/4019,transcript_HQ_YNMLP_transcript2023/f2p0/3…
GO:0030258	lipid modification	biological_process	0.20767	1	46	22033	74	39009	transcript_HQ_YNMLP_transcript11020/f10p0/2265,transcript_HQ_HBZL_transcript27026/f2p0/516,transcript_HQ_YNMLP_transcript10642/f3p0/2315,transcript_HQ_YNLB_transcript15471/f4p0/1588,transcript_HQ_HBZL_transcript4441/f2p0/2663,transcript_HQ_SCJY_transcript6929/f3p0/2286,transcript_HQ_HBZL_transcript8250/f3p0/2229,transcript_HQ_YNLB_transcript16933/f5p0/1376,transcript_HQ_SCJY_transcript5919/f9p0/2…
GO:0004594	pantothenate kinase activity	molecular_function	0.20797	1	5	22033	6	39009	transcript_HQ_YNMLP_transcript3476/f2p0/3222,transcript_HQ_YNMLP_transcript3043/f3p0/3299,transcript_HQ_YNLB_transcript3191/f2p0/3086,transcript_HQ_YNMLP_transcript3425/f2p0/3232,transcript_HQ_HBZL_transcript1818/f4p0/3294
GO:0006165	nucleoside diphosphate phosphorylation	biological_process	0.20803	1	118	22033	199	39009	transcript_HQ_YNLB_transcript15715/f2p0/1543,transcript_HQ_SCJY_transcript6917/f2p0/2261,transcript_HQ_HBZL_transcript20271/f2p0/1209,transcript_HQ_YNMLP_transcript15330/f2p0/1795,transcript_HQ_HBZL_transcript8810/f6p0/2158,transcript_HQ_YNMLP_transcript3122/f2p0/3279,transcript_HQ_YNLB_transcript8810/f2p0/2299,transcript_HQ_HBZL_transcript2154/f2p0/3209,transcript_HQ_YNMLP_transcript7995/f2p0/25…
GO:0009132	nucleoside diphosphate metabolic process	biological_process	0.20803	1	118	22033	199	39009	transcript_HQ_YNMLP_transcript8544/f2p0/2437,transcript_HQ_SCJY_transcript7951/f12p0/2157,transcript_HQ_HBZL_transcript9338/f4p0/2104,transcript_HQ_YNMLP_transcript12232/f2p0/2136,transcript_HQ_HBZL_transcript14143/f2p0/1731,transcript_HQ_SCJY_transcript15677/f2p0/1234,transcript_HQ_YNLB_transcript11699/f3p0/2118,transcript_HQ_HBZL_transcript5437/f5p0/2534,transcript_HQ_YNLB_transcript11641/f7p0/…
GO:0046939	nucleotide phosphorylation	biological_process	0.20803	1	118	22033	199	39009	transcript_HQ_HBZL_transcript8294/f2p0/2199,transcript_HQ_SCJY_transcript20711/f9p0/699,transcript_HQ_YNLB_transcript9827/f4p0/2205,transcript_HQ_YNMLP_transcript3362/f2p0/3224,transcript_HQ_YNMLP_transcript18941/f2p0/1336,transcript_HQ_YNMLP_transcript8320/f2p0/2556,transcript_HQ_YNMLP_transcript8394/f2p0/2541,transcript_HQ_YNMLP_transcript17965/f2p0/1481,transcript_HQ_YNLB_transcript5383/f3p0/2…
GO:0006023	aminoglycan biosynthetic process	biological_process	0.20813	1	18	22033	27	39009	transcript_HQ_YNLB_transcript4313/f3p0/2841,transcript_HQ_YNMLP_transcript19373/f2p0/1285,transcript_HQ_YNMLP_transcript5572/f3p0/2870,transcript_HQ_HBZL_transcript1938/f3p0/3275,transcript_HQ_HBZL_transcript2944/f2p0/2891,transcript_HQ_HBZL_transcript3080/f2p0/2951,transcript_HQ_YNMLP_transcript5916/f6p0/2795,transcript_HQ_YNLB_transcript8220/f2p0/2370,transcript_HQ_HBZL_transcript3996/f7p0/2748…
GO:0008299	isoprenoid biosynthetic process	biological_process	0.2083	1	83	22033	138	39009	transcript_HQ_YNMLP_transcript8132/f59p0/2533,transcript_HQ_YNMLP_transcript22034/f2p0/974,transcript_HQ_YNLB_transcript5517/f6p0/2647,transcript_HQ_YNMLP_transcript5082/f2p0/2936,transcript_HQ_HBZL_transcript15815/f2p0/1639,transcript_HQ_HBZL_transcript5465/f334p0/2478,transcript_HQ_YNMLP_transcript13693/f3p0/1872,transcript_HQ_HBZL_transcript4648/f2p0/2692,transcript_HQ_SCEZ_transcript19376/f5p…
GO:0006094	gluconeogenesis	biological_process	0.20896	1	24	22033	37	39009	transcript_HQ_YNMLP_transcript10487/f2p0/2316,transcript_HQ_YNMLP_transcript10097/f2p0/2356,transcript_HQ_HBZL_transcript728/f5p0/3991,transcript_HQ_HBZL_transcript6485/f11p0/2366,transcript_HQ_YNLB_transcript10766/f9p0/2048,transcript_HQ_HBZL_transcript3258/f2p0/2888,transcript_HQ_HBZL_transcript15160/f4p0/1711,transcript_HQ_HBZL_transcript6479/f14p0/2380,transcript_HQ_HBZL_transcript6368/f5p0/2…
[truncated: 3,397 more rows]

## Sheet: HBZLvsYNLB
GO_accession	Description	Term_type	Over_represented_pValue	Corrected_pValue	DEG_item	DEG_list	Bg_item	Bg_list	Gene_names
[truncated: 4,238 more rows]

## Sheet: SCEZvsYNLB
GO_accession	Description	Term_type	Over_represented_pValue	Corrected_pValue	DEG_item	DEG_list	Bg_item	Bg_list	Gene_names
[truncated: 4,410 more rows]

## Sheet: SCEZvsYNMLP
GO_accession	Description	Term_type	Over_represented_pValue	Corrected_pValue	DEG_item	DEG_list	Bg_item	Bg_list	Gene_names
[truncated: 4,440 more rows]

[truncated: 1 more sheets: SCJYvsHBZL]
