# Supplementary material for: Dissection of full-length transcriptome and metabolome of Dichocarpum (Ranunculaceae): implications in evolution of specialized metabolism of Ranunculales medicinal plants
Source: PeerJ journal article supplement (doi:10.7717/peerj.12428), 2021-11-05
Supplement: Table_S8,peak_area,RT,.xlsx [file Table_S8%2Cpeak_area%2CRT%2C.xlsx]

## Sheet: Sheet1
Table S8 Detailed information of the putatively identified compounds from five Dichocarpum species based on UPLC-Q-TOF-MS/MS untargeted metabolomics technology and their raw peak abundance
No.	Retention time	Formula	Putatively identification	Class	Subclass	Identification methods	D. auriculatum	D. basilare	D. lobatipetalum	D. malipoense	D. fargesii
1	0.72	C6H12O6	D-galactofuranose	saccharide	monosaccharide	M2	4.51714	0	9.06023	4.19355	18.3861
2	0.73	C30H52O26	β-D-glycero-hex-2-ulofuranosyl-(2->1)-[β-D-glycero-hex-2-ulofuranosyl-(2->6)]-β-D-glycero-hex-2-ulofuranosyl-(2->1)-β-D-glycero-hex-2-ulofuranosyl α-D-erythro-hexopyranoside	saccharide	oligosaccharide	M2	76.949	0	72.732	125.941	0
3	0.73	C18H32O16	α-D-glucopyranosyl-(1->4)-α-D-glucopyranosyl-(1->4)-D-glucopyranose	saccharide	oligosaccharide	M2	120.07	69.36	102.99	45.02	144.49
4	0.95	C18H32O16	α-D-glucopyranosyl-(1->3)-α-D-glucopyranosyl-(1->4)-D-glucopyranose	saccharide	oligosaccharide	M2	190.933	41.1722	408.451	166.869	0
5	0.96	C30H52O26	β-D-erythro-hexopyranosyl-(1->1)-β-D-glycero-hex-2-ulofuranosyl (2ξ)-D-xylo-hexopyranosyl-(1->6)-[(5ξ)-L-arabino-hexopyranosyl-(1->4)]-β-D-threo-hexopyranoside	saccharide	oligosaccharide	M2	240.802	32.6444	392.628	213.013	0
6a	0.96	C14H24O12	1-O-acetyl-α-maltose	saccharide	oligosaccharide	M2	0	188.466	206.64	0	199.272
6b	0.96	C14H24O12	4-O-(6-O-acetyl-α-D-glucopyranosyl)-D-glucopyranose	saccharide	oligosaccharide	M2	0	188.466	206.64	0	199.272
7	0.96	C24H42O21	α-D-glucopyranosyl-(1->4)-α-D-glucopyranosyl-(1->4)-α-D-glucopyranosyl-(1->4)-D-glucopyranose	saccharide	oligosaccharide	M2	46.8708	6.81626	12.6524	0	0
8	0.96	C24H42O21	β-D-fructofuranosyl α-D-galactopyranosyl-(1->4)-[α-D-galactopyranosyl-(1->6)]-α-D-glucopyranoside	saccharide	oligosaccharide	M2	315.915	20.7125	424.793	316.141	0
9a	1.01	C6H8O7	isocitric acid	organic acid	organic acid	M2	45.3705	48.0594	27.771	16.9062	193.143
9b	1.01	C6H8O7	citric acid	organic acid	organic acid	M2	45.3705	48.0594	27.771	16.9062	193.143
10a	2.47	C7H6O3	salicylic acid	organic acid	organic acid	M2	1.54916	0	2.13635	53.2577	0
10b	2.47	C7H6O3	4-hydroxybenzoic acid	organic acid	organic acid	M2	1.54916	0	2.13635	53.2577	0
11	2.64	C6H12O6	D-altropyranose	saccharide	monosaccharide	M2	0	1.32767	0	310.616	0
12	3.32	C10H12O5	2-(3,4-dihydroxybenzyl)-3-hydroxypropanoic acid	organic acid	organic acid	M2	0	124.103	939.661	49.7577	23.5691
13	3.87	C18H28O9	[(1R,2R)-2-{(2Z)-5-[(4ξ)-α-L-arabino-hexopyranosyloxy]-2-penten-1-yl}-3-oxocyclopentyl]acetic acid	organic acid	organic acid	M2	0	0	0	0	2.69636
14	3.96	C27H30O15	4-(3,4-dihydroxyphenyl)-7-methoxy-2-oxo-2H-chromen-5-yl (4ξ)-6-O-[(2R)-3,4-dihydroxy-4-(hydroxymethyl)tetrahydro-2-furanyl]-β-D-ribo-hexopyranoside	lactones	coumarin	M2	0	0	0	0	21.9161
15	4.17	C19H24NO3	magnoflorine	alkaloids	aporphine	M3	84326.2	308231	111503	194626	27945.6
16	4.43	C21H20O11	quercetin-3-O-α-L-rhamnoside	flavonoids	flavonol glycoside	M2	0	0	0	0	1492.44
17a	4.52	C27H30O16	quercetin-3-rutinoside	flavonoids	flavonol glycoside	M2	352.919	0	9.52524	0	0
17b	4.52	C27H30O16	rutin	flavonoids	flavonol glycoside	M2	352.919	0	9.52524	0	0
18	4.54	C19H21NO4	scoulerine	alkaloids	protoberberine	M2	327.266	645.417	3726.75	6698.24	99.2573
19	4.54	C33H40O21	quercetin-3-O-sophoroside-7-O-rhamnoside	flavonoids	flavonol glycoside	M2	1977.14	9.21535	0	0	0
20	4.71	C8H10O3	4-hydroxy-6-propyl-2H-pyran-2-one	lactones	lactone ring	M2	0	0	24.8006	48.4564	0
21	4.81	C20H26O7	(3S,7S,11E)-7,16-dihydroxy-13,14-dimethoxy-3-methyl-4,5,6,7,9,10-hexahydro-1H-2-benzoxacyclotetradecine-1,8(3H)-dione	lactones	simple phenylpropanoids	M2	89.9717	1246.76	0	0	0
22	4.85	C33H40O20	2-(3,4-dihydroxyphenyl)-5,7-dihydroxy-4-oxo-4H-chromen-3-yl 6-deoxy-D-glycero-hexopyranosyl-(1->3)-[6-deoxy-D-glycero-hexopyranosyl-(1->6)]-α-L-erythro-hexopyranoside	flavonoids	flavonol glycoside	M2	0	13.6056	0	0	119.718
23	5.24	C19H21NO4	boldine	alkaloids	aporphine	M2	45.2723	26.5919	440.49	40.9725	21.3385
24	5.24	C27H30O16	luteolin-7-O-gentiobioside	flavonoids	flavonol glycoside	M2	26.4827	519.527	0	0	45.5731
25	5.28	C34H40O18	3,6-bis-O-[(2Z)-3-(4-hydroxy-3-methoxyphenyl)-2-propenoyl]-α-L-glycero-hex-2-ulofuranosyl 6-O-acetyl-β-D-glucopyranoside	lactones	simple phenylpropanoids	M2	0	0	0	147.918	0
26	5.3	C38H42N2O8	(6aS)-8-(4-{[(1S)-6,7-dimethoxy-2-methyl-1,2,3,4-tetrahydro-1-isoquinolinyl]methyl}phenoxy)-1,2,10-trimethoxy-6-methyl-5,6,6a,7-tetrahydro-4H-dibenzo[de,g]quinoline-3,9-diol(3-hydroxythalifaboramine)	alkaloids	aporphine	M1	76.7761	6.56257	0	0	12.8185
27	5.31	C33H40O22	5,7-dihydroxy-4-oxo-2-(3,4,5-trihydroxyphenyl)-4H-chromen-3-yl D-glucopyranosyl-(1->3)-(4ξ)-6-deoxy-α-L-xylo-hexopyranosyl-(1->6)-β-D-glucopyranoside	flavonoids	flavonol glycoside	M2	0	0	69.5092	0	0
28	5.4	C19H19NO4	cheilanthifoline	alkaloids	protoberberine	M2	3634.8	29465.5	8.59513	122.15	0
29	5.51	C20H15NO6	9,10-dimethoxy-7-methyl-5H-[1,3]- benzodioxolo-[6,5,4-de]benzo[g]quinoline-5,6(7H)-dione(4,5-dioxodehydrocrebanine)	alkaloids	aporphine	M1	0	0	0	189.763	0
30	5.51	C9H10O5	3-(3,4-dihydroxyphenyl)-2-hydroxypropanoic acid	organic acid	organic acid	M2	0	0	0	380.716	0
31a	5.84	C33H40O21	5,7-dihydroxy-2-(4-hydroxyphenyl)-4-oxo-4H-chromen-3-yl hexopyranosyl-(1->2)hexopyranosyl-(1->2)hexopyranoside	flavonoids	flavonol glycoside	M2	0	0	43.9287	0	0
31b	5.84	C33H40O21	2-(3,4-dihydroxyphenyl)-5-hydroxy-4-oxo-4H-chromen-7-yl D-allopyranosyl-(1->2)-[(4ξ)-α-D-ribo-hexopyranosyl-(1->6)]-(2ξ)-α-D-ribo-hexopyranoside	flavonoids	flavonol glycoside	M2	0	0	43.9287	0	0
32	5.96	C19H30O9	(3E)-4-[(1S,6S)-1-hydroxy-2,2,6-trimethyl-4-oxocyclohexyl]-2-oxo-3-buten-1-yl α-L-glycero-hexopyranoside	lactones	sesquiterpenoid glycoside	M2	993.843	173.858	18.5195	0	0
33	5.99	C27H30O16	isoorientin	flavonoids	flavonoid glycoside	M1	39.403	0	0	0	0
34	6.06	C20H24NO4	steponine	alkaloids	protoberberine	M3	11.8828	5.79945	0	0	10.0226
35	6.06	C15H10O7	quercetin	flavonoids	flavonol	M2	0	0	0	0	41.5832
36	6.06	C22H24O12	undulatoside	flavonoids	flavonol glycoside	M2	0	0	0	2.71286	0
37	6.06	C27H30O15	cyanidin 3-O-rutinoside βine	flavonoids	anthocyanins	M2	0	0	0	0	55.5028
38	6.06	C32H38O19	isovitexin 2''-O-arabinosyl 7-O-galactoside	flavonoids	flavonoid glycoside	M2	0	0	0	0	136.201
39	6.14	C26H28O15	quercetin 3-O-(2-O-β-D-apiofuranosyl)-α-L-rhamnopyranoside(xylopoillin A)	flavonoids	flavonol glycoside	M2	500.827	2.37463	0	0	0
40	6.24	C28H34O17	3'-methoxy-3,5,4'-trihydroxyflavone-7-neohesperidoside	flavonoids	flavonol glycoside	M2	0	422.387	0	0	0
41	6.28	C27H30O14	3-[(6-deoxyhexopyranosyl)oxy]-5-hydroxy-2-(4-hydroxyphenyl)-4-oxo-4H-chromen-7-yl 6-deoxyhexopyranoside	flavonoids	flavonol glycoside	M2	0	0	212.369	0	0
42	6.42	C26H28O13	schachristanoside	flavonoids	flavonoid glycoside	M2	0	12.1378	0	0	0
43	6.55	C11H12O5	(3S)-5,7-dihydroxy-3-[(1S)-1-hydroxyethyl]-6-methyl-2-benzofuran-1(3H)-one	lactones	simple phenylpropanoids	M2	169.663	0	0	0	0
44	6.63	C25H26O14	3-hydroxy-5-(2,4,6-trihydroxybenzoyl)phenyl3,4,6-tri-O-acetyl-β-D-glucopyranoside	flavonoids	flavonol glycoside	M2	0	0	0	0	294.668
45	6.72	C26H28O14	luteolin-6-C-[2'-O-α-L-rhamnopyranosyl-(1''->2')]-α-L-arabinopyranosyl	flavonoids	flavonoid glycoside	M2	6.99475	2176.73	0	0	7169.88
46a	6.92	C21H26NO4	menisperine	alkaloids	aporphine	M1	3039.36	11544.6	424.72	50.2733	18.8506
46b	6.92	C21H26NO4	2,11-dihydroxy-1,10-dimethoxy-6,6-dimethyl-5,6,6a,7-tetrahydro-4H-dibenzo[de,g]quinolinium(N,N-dimethyllindcarpine)	alkaloids	aporphine	M1	3039.36	11544.6	424.72	50.2733	18.8506
47	7.02	C22H22O11	quercetin-3-O-(4"-methoxy)-α-L-rhamnopyranosyl	flavonoids	flavonol glycoside	M2	0	1374.47	0	0	0
48	7.09	C26H28O15	2-(3,4-dihydroxyphenyl)-5,7-dihydroxy-4-oxo-4H-chromen-3-yl6-deoxy-2-O-[3,4-dihydroxy-4-(hydroxymethyl)tetrahydro-2-furanyl]-L-talopyranoside	flavonoids	flavonol glycoside	M2	500.827	2.37463	0	0	0
49	7.09	C26H28O15	quercetin 3-O-(2-O-β-D-apiofuranosyl)-α-L-rhamnopyranoside	flavonoids	flavonol glycoside	M2	0	15.5065	0	0	0
50	7.3	C38H42N2O7	berberine	alkaloids	berberine	M3	513721	15712.9	6492.99	2526.77	2143.11
51a	7.44	C21H20O10	5,7-dihydroxy-2-(4-hydroxyphenyl)-4-oxo-4H-chromen-3-yl 6-deoxy-L-galactopyranoside	flavonoids	flavonol glycoside	M2	0	334.094	0	0	7820.04
51b	7.44	C21H20O10	6,8-dihydroxy-2-(3-hydroxyphenyl)-4-oxo-4H-chromen-3-yl(3xi)-6-deoxy-D-lyxo-hexopyranoside	flavonoids	flavonol glycoside	M2	0	334.094	0	0	7820.04
52	7.62	C28H32O16	rhamnetin-3-O-rutinoside	flavonoids	flavonol glycoside	M2	0	0	0	0	21.3674
53	7.89	C15H12O7	globosuxanthone A	lactones	simple phenylpropanoids	M2	0	3.58918	0	0	23.5125
54	7.99	C15H12O7	kaempferol	flavonoids	flavonol	M2	0	0	0	0	173.183
55	9.06	C21H22NO4	palmatine	alkaloids	berberine	M1	609.41	824.954	677.344	210.037	127.765
56	9.52	C21H20O10	kaempferol 3-O-α-L-rhamnopyranosyl	flavonoids	flavonol glycoside	M2	0	114.801	0	0	824.429
57	10.19	C36H62O11	floralquinquenoside A	triterpenoids and steroids	dammarane	M2	0	0	0	0	626.944
58	10.97	C42H70O15	astramembranoside A	triterpenoids and steroids	cycloartane	M2	0	0	0	0	62.3373
59	11.06	C54H90O24	(3β,5β,8ξ,9β,10α,16α,17ξ,22S,24Z)-3-{[D-glucopyranosyl-(1->2)-D-glucopyranosyl-(1->2)-D-galactopyranosyl]oxy}-16,22-dihydroxy-9,19-cyclolanost-24-en-27-yl (5ξ)-D-arabino-hexopyranoside	triterpenoids and steroids	cycloartane	M2	0	0	65.9595	0	15.2685
60	11.26	C45H76O19	timosaponin BII	triterpenoids and steroids	furostan	M2	0	0	0	0	388.288
61	11.38	C45H72O18	indioside A	triterpenoids and steroids	spirostanol	M2	0	0	0	0	128.965
62	11.48	C42H68O15	(3β,5ξ,9ξ,16β,17ξ,18ξ,21β)-16,21,28-trihydroxyolean-12-en-3-yl2-O-[(3ξ)-β-D-ribo-hexopyranosyl]-β-D-glycero-hexopyranosiduronic acid	triterpenoids and steroids	oleanane	M2	0	0	0	10.7913	1.80394
63	11.57	C48H76O21	acankoreoside M	triterpenoids and steroids	hopane	M2	0	0	0	0	14.6477
64	11.72	C41H64O14	aquilegiosides A	triterpenoids and steroids	cycloartane	M1	0	0	0	0	34.4049
65	12.02	C39H64O13	torvoside J	triterpenoids and steroids	spirostanol	M2	76.2721	68.1514	24.6698	0	1388.72
66	12.38	C45H74O18	(25R)-5β-spirostan-3-β-ol	triterpenoids and steroids	spirostanol	M2	6.02153	2.37616	22.8363	32.5526	38.7642
67	14.04	C18H34O3	(9Z,16R)-16-hydroxy-9-octadecenoic acid	organic acid	organic acid	M2	1.57405	0	0	0	0
68	14.94	C38H40N2O7	thalsimine	alkaloids	bisbenzylisoquinoline	M1	1038.37	996.106	875.678	842.242	853.943
69	14.94	C38H40N2O7	thalidezine	alkaloids	bisbenzylisoquinoline	M1	12.0243	0	402.176	0	21.6639
Note: M1, Method 1, Progenesis MetaScope with an in-house database; M2, a commercial metabolic profiling CCS library package; M3, standard compounds comparison.
