# Supplementary material for: Dissection of full-length transcriptome and metabolome of Dichocarpum (Ranunculaceae): implications in evolution of specialized metabolism of Ranunculales medicinal plants
Source: PeerJ journal article supplement (doi:10.7717/peerj.12428), 2021-11-05
Supplement: TableS5_short_name.xlsx [file TableS5_short_name.xlsx]

## Sheet: Sheet1
Table S5 Abbreviation and corresponding full name of genus used in the phylogenetic trees of genes
Abbreviation	Full name	Note
ACxG	Aquilegia coerulea	sequences identified from the genome annotation dataset
EC,Eca	Eschscholzia californica	sequences identified from the genome annotation dataset
MC	Macleaya cordata	sequences identified from the genome annotation dataset
NN	Nelumbo nucifera	sequences identified from the genome annotation dataset
PS	Papaver somniferum	sequences identified from the genome annotation dataset
Ak trifoliata	Akebia trifoliata	order:Ranunculales; family:Ranunculaceae
Am trichopoda	Amborella trichopoda	order:Amborellales; family:Amborellaceae
An hupenhensis	Anemone hupenhensis	order:Ranunculales; family:Ranunculaceae
An pulsatilla	Anemone pulsatilla	order:Ranunculales; family:Ranunculaceae
Ar mexicana	Argemone mexicana	order:Ranunculales; family:Papaveraceae
At	Arabidopsis thaliana	order:Capparales; family:Brassicaceae
Be stolonifera	Berberis stolonifera	order:Ranunculales; family:Berberidaceae
Be wilsoniae	Berberis wilsoniae	order:Ranunculales; family:Berberidaceae
Ca acuminata	Camptotheca acuminata	order:Cornales; family:Nyssaceae
Ca roseus	Catharanthus roseus	order:Gentianales; family: Apocynaceae
Ca sativa	Cannabis sativa	order:Rosales; family:Cannabaceae
Ca sempervirens	Capnoides sempervirens	order:Ranunculales; family:Papaveraceae
Ce vesicaria	Ceratocapnos vesicaria	order:Ranunculales; family:Papaveraceae
Ch borivilianum	Chlorophytum borivilianum	order:Asparagales; family:Asparagaceae
Ch majus	Chelidonium majus	order:Ranunculales; family:Papaveraceae
Ch reinhardtii	Chlamydomonas reinhardtii	order:Chlamydomonadales; family:Chlamydomonadaceae
Cm	Citrus maxima	order:Sapindales; family:Rutaceae
Co anemonifolia	Coptis japonica var. anemonifolia	order:Ranunculales; family:Ranunculaceae
Co chinensis	Coptis chinensis	order:Ranunculales; family:Ranunculaceae
Co dissecta	Coptis japonica var. dissecta	order:Ranunculales; family:Ranunculaceae
Co japonica	Coptis japonica	order:Ranunculales; family:Ranunculaceae
Co teeta	Coptis teeta	order:Ranunculales; family:Ranunculaceae
Co linstowiana	Corydalis linstowiana	order:Ranunculales; family:Ranunculaceae
Co saxicola	Corydalis saxicola	order:Ranunculales; family:Ranunculaceae
Cs	Citrus sinensis	order:Sapindales; family:Rutaceae
De grandiflorum	Delphinium grandiflorum	order:Ranunculales; family:Ranunculaceae
Di cayenensis	Dioscorea cayenensis subsp. rotundata	order:Dioscoreales; family:Dioscoreaceae
Es californica	Eschscholzia californica	order:Ranunculales; family:Papaveraceae
Eu pleiosperma	Euptelea pleiosperma	order:Ranunculales; family:Eupteleaceae
Gl flavum	Glaucium flavum	order:Ranunculales; family:Papaveraceae
Hy canadensis	Hydrastis canadensis	order:Ranunculales; family:Ranunculaceae
Hy procumbens	Hypecoum procumbens	order:Ranunculales; family:Papaveraceae
Ja curcas	Jatropha curcas	order:Malpighiales; family:Euphorbiaceae
Ki uniflora	Kingdonia uniflora	order:Ranunculales; family:Circaeasteraceae
Ma cordata	Macleaya cordata	order:Ranunculales; family:Papaveraceae
Mt	Medicago truncatula	order:Fabales; family:Fabaceae
Na domestica	Nandina domestica	order:Ranunculales; family:Berberidaceae
Na pseudonarcissus	Narcissus aff. pseudonarcissus	order:Asparagales; family:Amaryllidaceae
Ne nucifera	Nelumbo nucifera	order:Proteales; family:Nelumbonaceae
Os	Oryza sativa	order:Poales; family:Poaceae
Pa bracteatum	Papaver bracteatum	order:Ranunculales; family:Papaveraceae
Pa ginseng	Panax ginseng	order:Apiales; family:Araliaceae
Pa rhoeas	Papaver rhoeas	order:Ranunculales; family:Papaveraceae
Pa setigerum	Papaver setigerum	order:Ranunculales; family:Papaveraceae
Pa somniferum	Papaver somniferum	order:Ranunculales; family:Papaveraceae
Ph patens	Physcomitrium patens	order:Funariales; family:Funariaceae
Po peltatum	Podophyllum peltatum	order:Ranunculales; family:Berberidaceae
Ps ipecacuanha	Psychotria ipecacuanha	order:Gentianales; family:Rubiaceae
Rh rubrinervis	Rhamnella rubrinervis	order:Rosales; family:Rhamnaceae
Ri communis	Ricinus communis	order:Malpighiales; family:Euphorbiaceae
Sa canadensis	Sanguinaria canadensis	order:Ranunculales; family:Papaveraceae
Si hexandrum	Sinopodophyllum hexandrum	order:Ranunculales; family:Berberidaceae
Th flavum	Thalictrum flavum	order:Ranunculales; family:Ranunculaceae
Th glaucum	Thalictrum flavum subsp. glaucum	order:Ranunculales; family:Ranunculaceae
Th thalictroides	Thalictrum thalictroides	order:Ranunculales; family:Ranunculaceae
Ti cordifolia	Tinospora cordifolia	order:Ranunculales; family:Menispermaceae
Vv,Vi vinifera	Vitis vinifera	order:Vitales; family:Vitaceae
ACCO	1-aminocyclopropane-1-carboxylic acid oxidase
BBE	berberine bridge enzyme
CNMT	coclaurine N-methyltransferase
CODM	codeine O-demethylase
CoOMT	columbamine O-methyltransferase
CTS	corytuberine synthase
F3H	flavanone 3-hydroxylase
FLS	flavonol synthase
FNSI	flavone synthase I
GT	glucosyltransferase
LDOX(ANS)	leucoanthocyanidin dioxygenase
NCS	norcoclaurine synthase
NMCH	N-methylcoclaurine 3'-hydroxylase
2OG	2-oxoglutarate
4'OMT	3'-hydroxy-N-methylcoclaurine 4'-O-methyltransferase
6OMT	norcoclaurine 6-O-methyltransferase
7OMT	norcoclaurine 7-O-methyltransferase
P6H	protopine 6-hydroxylase
RNMT	reticuline N-methyltransferase
SOMT	scoulerine 9-O-methyltransferase
STOX	(S)-tetrahydroprotoberberine oxidase
TNMT	tetrahydroprotoberberine N-methyltransferase
T6ODM	thebaine 6-O-demethylase
