# Supplementary material for: Dissection of full-length transcriptome and metabolome of Dichocarpum (Ranunculaceae): implications in evolution of specialized metabolism of Ranunculales medicinal plants
Source: PeerJ journal article supplement (doi:10.7717/peerj.12428), 2021-11-05
Supplement: TableS9,correlation.xlsx [file TableS9%2Ccorrelation.xlsx]

## Sheet: Sheet1
Table S9 Correlation between A) BIA content, B) BIA peak area, C) flavonoid peak area, D) phenylpropanoid/lactone peak area, E) trirepenoid/steroid peak area, F) saccharide peak area and G) organic acid peak area of five Dichocarpum species and gene expression level
Metabolites	Transcript_id	Correlation coefficient	p value	NR database	SwissProt	KEGG	KOG	GO	NT	Pfam	Co-associated metabolites
berberine(77)	transcript_HQ_SCEZ_transcript15937/f2p0/1566	1	0	{XP_010257975.2; PREDICTED: cytochrome P450 85A1-like [Nelumbo nucifera]}	{sp|Q69F95|C85A_PHAVU; Cytochrome P450 85A OS=Phaseolus vulgaris GN=BA13 PE=3 SV=2}	{nnu:104597895; K09590 CYP85A1, BR6OX1 brassinosteroid-6-oxidase 1 1.14.-.- ko00905; Metabolism; Metabolism of terpenoids and polyketides; Brassinosteroid biosynthesis}	{At5g38970; KOG0157 Cytochrome P450 CYP4/CYP19/CYP26 subfamilies QI Secondary metabolites biosynthesis, transport and catabolism ; Lipid transport and metabolism ;}	{GO:0055114; oxidation-reduction process; biological_process GO:0016021; integral to membrane; cellular_component GO:0020037; heme binding; molecular_function GO:0016705; oxidoreductase activity, acting on paired donors, with incorporation or reduction of molecular oxygen; molecular_function GO:0005506; iron ion binding; molecular_function}	{XM_010262327.2; PREDICTED: Nelumbo nucifera cytochrome P450 85A-like (LOC104599689), mRNA}	{PF01184:GPR1/FUN34/yaaH family PF00067:Cytochrome P450}	77,87	A
berberine(77)	transcript_HQ_YNLB_transcript1535/f2p0/3668	1	0	{XP_010249700.1; PREDICTED: myb-related protein 3R-1-like isoform X2 [Nelumbo nucifera]}	{sp|Q9S7G7|MB3R1_ARATH; Transcription factor MYB3R-1 OS=Arabidopsis thaliana GN=MYB3R1 PE=2 SV=1}	{nnu:104592176; - - - - -}	{At4g32730; KOG0048 Transcription factor, Myb superfamily K Transcription ;}	{GO:0006338; chromatin remodeling; biological_process GO:0005524; ATP binding; molecular_function GO:0003676; nucleic acid binding; molecular_function GO:0005634; nucleus; cellular_component GO:0016818; hydrolase activity, acting on acid anhydrides, in phosphorus-containing anhydrides; molecular_function}	{XM_010658013.2; PREDICTED: Vitis vinifera myb-related protein 3R-1 (LOC100255911), transcript variant X6, mRNA}	{PF09111:SLIDE}	77,87
steponine(79)	transcript_HQ_SCEZ_transcript11647/f2p0/1874	1	0	{XP_010270543.1; PREDICTED: CMP-sialic acid transporter 2 [Nelumbo nucifera]}	{sp|B8B7Q4|CSTR2_ORYSI; CMP-sialic acid transporter 2 OS=Oryza sativa subsp. indica GN=CSTLP2 PE=3 SV=1}	{rcu:8282453; K15272 SLC35A1_2_3 solute carrier family 35 (UDP-sugar transporter), member A1/2/3 - -}	{At5g41760; KOG2234 Predicted UDP-galactose transporter G Carbohydrate transport and metabolism ;}	{GO:0000139; Golgi membrane; cellular_component GO:0055085; transmembrane transport; biological_process GO:0008643; carbohydrate transport; biological_process GO:0005351; sugar:hydrogen symporter activity; molecular_function GO:0016021; integral to membrane; cellular_component GO:0016020; membrane; cellular_component}	{XM_010272241.2; PREDICTED: Nelumbo nucifera CMP-sialic acid transporter 2 (LOC104606844), mRNA}	{PF08449:UAA transporter family PF04142:Nucleotide-sugar transporter PF00892:EamA-like transporter family}	79,83
menisdaurin(81)	transcript_HQ_YNMLP_transcript12844/f2p0/2074	1	0	{XP_010270388.1; PREDICTED: GDP-mannose transporter GONST1 isoform X1 [Nelumbo nucifera]}	{sp|Q941R4|GONS1_ARATH; GDP-mannose transporter GONST1 OS=Arabidopsis thaliana GN=GONST1 PE=1 SV=2}	{cit:102609418; K15356 VRG4, GONST1 GDP-mannose transporter - -}	{At2g13650; KOG1444 Nucleotide-sugar transporter VRG4/SQV-7 GOU Carbohydrate transport and metabolism ; Posttranslational modification, protein turnover, chaperones ; Intracellular trafficking, secretion, and vesicular transport ;}	{GO:0016021; integral to membrane; cellular_component GO:0016020; membrane; cellular_component}	{XM_017759893.1; PREDICTED: Gossypium arboreum GDP-mannose transporter GONST1 (LOC108460407), transcript variant X2, mRNA}	{PF00892:EamA-like transporter family}	81,84
steponine(79)	transcript_HQ_SCEZ_transcript6314/f4p0/2361	1	0	{XP_015898533.1; PREDICTED: UDP-glycosyltransferase 73D1-like [Ziziphus jujuba]}	{sp|Q9SCP6|U73D1_ARATH; UDP-glycosyltransferase 73D1 OS=Arabidopsis thaliana GN=UGT73D1 PE=3 SV=1}	{pper:PRUPE_ppa019633mg; - - - - -}	{At3g53150; KOG1192 UDP-glucuronosyl and UDP-glucosyl transferase GC Carbohydrate transport and metabolism ; Energy production and conversion ;}	{GO:0016758; transferase activity, transferring hexosyl groups; molecular_function GO:0008152; NA}	{XM_007162747.1; Phaseolus vulgaris hypothetical protein (PHAVU_001G182600g) mRNA, complete cds}	{PF00201:UDP-glucoronosyl and UDP-glucosyl transferase}	79,83
berberine(77)	transcript_HQ_SCEZ_transcript19982/f2p0/1182	1	0	{XP_010278298.1; PREDICTED: caffeoylshikimate esterase [Nelumbo nucifera]}	{sp|Q9C942|CSE_ARATH; Caffeoylshikimate esterase OS=Arabidopsis thaliana GN=CSE PE=1 SV=1}	{cit:102616060; K01054 MGLL acylglycerol lipase 3.1.1.23 ko00561; Metabolism; Lipid metabolism; Glycerolipid metabolism | ko04923; Organismal Systems; Endocrine system; Regulation of lipolysis in adipocytes | ko04723; Organismal Systems; Nervous system; Retrograde endocannabinoid signaling}	{At1g11090; KOG1455 Lysophospholipase I Lipid transport and metabolism ;}	{GO:0008236; serine-type peptidase activity; molecular_function GO:0016787; hydrolase activity; molecular_function GO:0006508; proteolysis; biological_process}	{XM_004234081.3; PREDICTED: Solanum lycopersicum caffeoylshikimate esterase (LOC101262782), mRNA}	{PF02230:Phospholipase/Carboxylesterase PF00326:Prolyl oligopeptidase family PF02129:X-Pro dipeptidyl-peptidase (S15 family)}	77,87
menisdaurin(81)	transcript_HQ_YNLB_transcript6758/f2p0/2544	1	0	{ACH87168.1; senescence-related protein [Camellia sinensis]}	{sp|O48832|ERD7_ARATH; Protein EARLY-RESPONSIVE TO DEHYDRATION 7, chloroplastic OS=Arabidopsis thaliana GN=ERD7 PE=1 SV=1}	{egu:105044044; K19366 SPG20 spartin - ko04144; Cellular Processes; Transport and catabolism; Endocytosis}	{NA}	{NA}	{XM_008459460.2; PREDICTED: Cucumis melo uncharacterized LOC103497324 (LOC103497324), mRNA}	{NA}	81,84
menisdaurin(81)	transcript_HQ_SCJY_transcript5105/f5p0/2461	1	0	{ABK94960.1; unknown [Populus trichocarpa]}	{sp|Q94II3|PMTL_ARATH; Probable methyltransferase PMT21 OS=Arabidopsis thaliana GN=ERD3 PE=2 SV=1}	{pop:POPTR_0001s01380g; - - - - -}	{NA}	{GO:0008168; methyltransferase activity; molecular_function GO:0008152; NA}	{XM_010257467.2; PREDICTED: Nelumbo nucifera probable methyltransferase PMT21 (LOC104596364), transcript variant X2, mRNA}	{PF08241:Methyltransferase domain PF03141:Putative S-adenosyl-L-methionine-dependent methyltransferase}	81,84
steponine(79)	transcript_HQ_SCEZ_transcript17400/f4p0/1447	1	0	{XP_002284636.1; PREDICTED: uncharacterized protein LOC100266013 [Vitis vinifera]}	{sp|P73212|DFRA_SYNY3; Putative dihydroflavonol 4-reductase OS=Synechocystis sp. (strain PCC 6803 / Kazusa) GN=dfrA PE=3 SV=1}	{pxb:103949911; K15891 FLDH NAD+-dependent farnesol dehydrogenase 1.1.1.354 ko00900; Metabolism; Metabolism of terpenoids and polyketides; Terpenoid backbone biosynthesis | ko00909; Metabolism; Metabolism of terpenoids and polyketides; Sesquiterpenoid and triterpenoid biosynthesis}	{At4g33360; KOG1502 Flavonol reductase/cinnamoyl-CoA reductase V Defense mechanisms ;}	{GO:0003824; NA GO:0003854; 3-beta-hydroxy-delta5-steroid dehydrogenase activity; molecular_function GO:0050662; coenzyme binding; molecular_function GO:0055114; oxidation-reduction process; biological_process GO:0006694; steroid biosynthetic process; biological_process GO:0016616; oxidoreductase activity, acting on the CH-OH group of donors, NAD or NADP as acceptor; molecular_function}	{NA}	{PF01073:3-beta hydroxysteroid dehydrogenase/isomerase family PF01370:NAD dependent epimerase/dehydratase family}	79,83
steponine(79)	transcript_HQ_SCEZ_transcript20881/f3p0/1097	1	0	{ADZ72841.1; AGAMOUS-like 24-like protein 2, partial [Aquilegia formosa]}	{sp|Q9FVC1|SVP_ARATH; MADS-box protein SVP OS=Arabidopsis thaliana GN=SVP PE=1 SV=1}	{nnu:104595485; - - - - -}	{At2g22540; KOG0014 MADS box transcription factor K Transcription ;}	{GO:0006355; regulation of transcription, DNA-dependent; biological_process GO:0006914; autophagy; biological_process GO:0046983; protein dimerization activity; molecular_function GO:0003677; DNA binding; molecular_function GO:0005737; cytoplasm; cellular_component GO:0043093; cytokinesis by binary fission; biological_process GO:0090529; NA GO:0003700; sequence-specific DNA binding transcription …	{HQ173339.1; Aquilegia formosa AGAMOUS-like 24-like protein 2 (AGL24.2) mRNA, partial cds}	{PF06005:Protein of unknown function (DUF904) PF01486:K-box region PF04111:Autophagy protein Apg6 PF00319:SRF-type transcription factor (DNA-binding and dimerisation domain)}	79,83
steponine(79)	transcript_HQ_YNMLP_transcript2999/f2p0/3326	1	0	{EOX94914.1; RNA-binding protein-defense related 1 isoform 2 [Theobroma cacao]}	{sp|Q8LFS6|BRN1L_ARATH; RNA-binding protein BRN1 OS=Arabidopsis thaliana GN=BRN1 PE=2 SV=1}	{nnu:104585582; K13207 CUGBP, BRUNOL, CELF CUG-BP- and ETR3-like factor - -}	{At4g03110; KOG0144 RNA-binding protein CUGBP1/BRUNO (RRM superfamily) A RNA processing and modification ;}	{GO:0003676; nucleic acid binding; molecular_function}	{XM_017778704.1; PREDICTED: Gossypium arboreum RNA-binding protein BRN1-like (LOC108476497), transcript variant X1, mRNA}	{PF00076:RNA recognition motif. (a.k.a. RRM, RBD, or RNP domain) PF16367:RNA recognition motif}	79,83
berberine(77)	transcript_HQ_SCEZ_transcript12256/f60p0/1823	1	0	{XP_011089565.1; PREDICTED: MLO-like protein 1 [Sesamum indicum]}	{sp|O49621|MLO1_ARATH; MLO-like protein 1 OS=Arabidopsis thaliana GN=MLO1 PE=1 SV=1}	{cmo:103499008; K08472 MLO mlo protein - -}	{NA}	{GO:0016021; integral to membrane; cellular_component GO:0006952; defense response; biological_process}	{XM_010279556.2; PREDICTED: Nelumbo nucifera MLO-like protein 1 (LOC104612209), mRNA}	{PF03094:Mlo family}	77,87
menisdaurin(81)	transcript_HQ_YNMLP_transcript12513/f2p0/2099	1	0	{KDO82795.1; hypothetical protein CISIN_1g0229931mg, partial [Citrus sinensis]}	{sp|Q9CAR7|HIR2_ARATH; Hypersensitive-induced response protein 2 OS=Arabidopsis thaliana GN=HIR2 PE=1 SV=1}	{cic:CICLE_v10032213mg; - - - - -}	{At1g69840; KOG2620 Prohibitins and stomatins of the PID superfamily C Energy production and conversion ;}	{NA}	{XM_007046161.2; PREDICTED: Theobroma cacao hypersensitive-induced response protein 2 (LOC18610483), mRNA}	{NA}	81,84
berberine(77)	transcript_HQ_SCEZ_transcript6733/f2p0/2324	1	0	{Q8W3Z1.1; RecName: Full=Beta-amyrin synthase}	{sp|Q8W3Z1|BAMS_BETPL; Beta-amyrin synthase OS=Betula platyphylla GN=OSCBPY PE=1 SV=1}	{sind:105173656; K15813 LUP4 beta-amyrin synthase 5.4.99.39 ko00909; Metabolism; Metabolism of terpenoids and polyketides; Sesquiterpenoid and triterpenoid biosynthesis}	{At1g78950; KOG0497 Oxidosqualene-lanosterol cyclase and related proteins I Lipid transport and metabolism ;}	{GO:0005615; extracellular space; cellular_component GO:0003824; NA}	{XM_010247447.2; PREDICTED: Nelumbo nucifera beta-amyrin synthase-like (LOC104589206), transcript variant X1, mRNA}	{PF00432:Prenyltransferase and squalene oxidase repeat PF07678:A-macroglobulin complement component}	77,87
menisdaurin(81)	transcript_HQ_YNMLP_transcript25069/f2p0/671	1	0	{CAN75773.1; hypothetical protein VITISV_033952 [Vitis vinifera]}	{sp|Q941R6|MLP31_ARATH; MLP-like protein 31 OS=Arabidopsis thaliana GN=MLP31 PE=2 SV=2}	{vvi:100245649; - - - - -}	{NA}	{GO:0006952; defense response; biological_process GO:0009607; response to biotic stimulus; biological_process}	{NA}	{PF00407:Pathogenesis-related protein Bet v I family}	81,84
menisdaurin(81)	transcript_HQ_YNMLP_transcript4183/f2p0/3042	1	0	{XP_010252328.1; PREDICTED: general transcription factor 3C polypeptide 3 isoform X1 [Nelumbo nucifera]}	{sp|Q9Y5Q9|TF3C3_HUMAN; General transcription factor 3C polypeptide 3 OS=Homo sapiens GN=GTF3C3 PE=1 SV=1}	{nnu:104593928; K15201 GTP3C3, TFC4 general transcription factor 3C polypeptide 3 (transcription factor C subunit 4) - -}	{At1g17680; KOG2076 RNA polymerase III transcription factor TFIIIC K Transcription ;}	{GO:0046983; protein dimerization activity; molecular_function GO:0005515; protein binding; molecular_function GO:0042802; identical protein binding; molecular_function}	{XM_006441733.1; Citrus clementina hypothetical protein (CICLE_v10019721mg) mRNA, complete cds}	{PF13414:TPR repeat PF13374:Tetratricopeptide repeat PF00515:Tetratricopeptide repeat PF13174:Tetratricopeptide repeat PF14863:Alkyl sulfatase dimerisation PF13176:Tetratricopeptide repeat PF13371:Tetratricopeptide repeat PF07721:Tetratricopeptide repeat PF13181:Tetratricopeptide repeat}	81,84
berberine(77)	transcript_HQ_SCEZ_transcript17842/f3p0/1398	1	0	{XP_010664611.1; PREDICTED: serpin-ZX [Vitis vinifera]}	{sp|Q9S7T8|SPZX_ARATH; Serpin-ZX OS=Arabidopsis thaliana GN=At1g47710 PE=1 SV=1}	{pmum:103320772; K13963 SERPINB serpin B - ko05146; Human Diseases; Infectious diseases: Parasitic; Amoebiasis}	{At1g47710; KOG2392 Serpin V Defense mechanisms ;}	{NA}	{XM_003602925.2; Medicago truncatula serpin-ZX-like protein mRNA}	{NA}	77,87
menisdaurin(81)	transcript_HQ_YNMLP_transcript15182/f2p0/1805	1	0	{XP_018840072.1; PREDICTED: cytochrome P450 71A1-like [Juglans regia]}	{sp|P24465|C71A1_PERAE; Cytochrome P450 71A1 OS=Persea americana GN=CYP71A1 PE=1 SV=2}	{cic:CICLE_v10023920mg; - - - - -}	{At1g13080; KOG0156 Cytochrome P450 CYP2 subfamily Q Secondary metabolites biosynthesis, transport and catabolism ;}	{GO:0020037; heme binding; molecular_function GO:0016705; oxidoreductase activity, acting on paired donors, with incorporation or reduction of molecular oxygen; molecular_function GO:0005506; iron ion binding; molecular_function GO:0055114; oxidation-reduction process; biological_process}	{NA}	{PF00067:Cytochrome P450}	81,84
berberine(77)	transcript_HQ_YNLB_transcript510/f2p0/4496	1	0	{XP_019238937.1; PREDICTED: ABC transporter B family member 1 [Nicotiana attenuata]}	{sp|Q9ZR72|AB1B_ARATH; ABC transporter B family member 1 OS=Arabidopsis thaliana GN=ABCB1 PE=1 SV=1}	{gmx:100817829; K05658 ABCB1, CD243 ATP-binding cassette, subfamily B (MDR/TAP), member 1 3.6.3.44 ko02010; Environmental Information Processing; Membrane transport; ABC transporters | ko04976; Organismal Systems; Digestive system; Bile secretion | ko05206; Human Diseases; Cancers: Overview; MicroRNAs in cancer}	{At2g36910; KOG0055 Multidrug/pheromone exporter, ABC superfamily Q Secondary metabolites biosynthesis, transport and catabolism ;}	{GO:0016301; kinase activity; molecular_function GO:0005525; GTP binding; molecular_function GO:0008152; NA GO:0042626; ATPase activity, coupled to transmembrane movement of substances; molecular_function GO:0007186; G-protein coupled receptor protein signaling pathway; biological_process GO:0016887; ATPase activity; molecular_function GO:0004871; signal transducer activity; molecular_function GO…	{XM_010268894.2; PREDICTED: Nelumbo nucifera ABC transporter B family member 1-like (LOC104604517), mRNA}	{PF13304:AAA domain, putative AbiEii toxin, Type IV TA system PF00503:G-protein alpha subunit PF00485:Phosphoribulokinase / Uridine kinase family PF00005:ABC transporter PF06414:Zeta toxin PF03193:Protein of unknown function, DUF258 PF00004:ATPase family associated with various cellular activities (AAA) PF00664:ABC transporter transmembrane region PF07728:AAA domain (dynein-related subfamily)}	77,87
berberine(77)	transcript_HQ_SCEZ_transcript16179/f2p0/1553	1	0	{XP_002267536.1; PREDICTED: uncharacterized protein LOC100253093 [Vitis vinifera]}	{sp|Q6AXX6|F213A_RAT; Redox-regulatory protein FAM213A OS=Rattus norvegicus GN=Fam213a PE=1 SV=1}	{vvi:100253093; - - - - -}	{Hs14150116_2; KOG4498 Uncharacterized conserved protein S Function unknown ;}	{GO:0016209; NA GO:0016491; oxidoreductase activity; molecular_function GO:0005515; protein binding; molecular_function GO:0055114; oxidation-reduction process; biological_process}	{XM_006437767.1; Citrus clementina hypothetical protein (CICLE_v10031661mg) mRNA, complete cds}	{PF00578:AhpC/TSA family PF00536:SAM domain (Sterile alpha motif) PF08534:Redoxin}	77,87
berberine(77)	transcript_HQ_SCEZ_transcript18336/f4p0/1350	1	0	{XP_010252832.1; PREDICTED: short-chain dehydrogenase TIC 32, chloroplastic-like [Nelumbo nucifera]}	{sp|A2RVM0|TIC32_ARATH; Short-chain dehydrogenase TIC 32, chloroplastic OS=Arabidopsis thaliana GN=TIC32 PE=2 SV=1}	{nnu:104594289; K11153 RDH12 retinol dehydrogenase 12 1.1.1.300 ko00830; Metabolism; Metabolism of cofactors and vitamins; Retinol metabolism}	{At4g24050; KOG1208 Dehydrogenases with different specificities (related to short-chain alcohol dehydrogenases) Q Secondary metabolites biosynthesis, transport and catabolism ;}	{GO:0003824; NA GO:0050662; coenzyme binding; molecular_function}	{XM_018979650.1; PREDICTED: Juglans regia short-chain dehydrogenase TIC 32, chloroplastic-like (LOC109002065), mRNA}	{PF01370:NAD dependent epimerase/dehydratase family}	77,87
menisdaurin(81)	transcript_HQ_YNMLP_transcript12191/f2p0/2029	1	0	{BAO04176.1; hypothetical protein [Delphinium grandiflorum]}	{sp|Q9FZE0|BGL40_ARATH; Beta-glucosidase 40 OS=Arabidopsis thaliana GN=BGLU40 PE=2 SV=1}	{jcu:105630530; K01188 E3.2.1.21 beta-glucosidase 3.2.1.21 ko00500; Metabolism; Carbohydrate metabolism; Starch and sucrose metabolism | ko00460; Metabolism; Metabolism of other amino acids; Cyanoamino acid metabolism | ko00940; Metabolism; Biosynthesis of other secondary metabolites; Phenylpropanoid biosynthesis}	{At1g26560; KOG0626 Beta-glucosidase, lactase phlorizinhydrolase, and related proteins G Carbohydrate transport and metabolism ;}	{GO:0004553; hydrolase activity, hydrolyzing O-glycosyl compounds; molecular_function GO:0005975; carbohydrate metabolic process; biological_process}	{AB811442.1; Delphinium grandiflorum DgBGLU5 mRNA for hypothetical protein, complete cds}	{PF00150:Cellulase (glycosyl hydrolase family 5) PF00232:Glycosyl hydrolase family 1}	81,84
berberine(77)	transcript_HQ_YNLB_transcript9/f2p0/7893	1	0	{XP_010249786.1; PREDICTED: uncharacterized protein LOC104592245 [Nelumbo nucifera]}	{sp|Q551A3|Y6689_DICDI; Protein DDB_G0276689 OS=Dictyostelium discoideum GN=DDB_G0276689 PE=4 SV=2}	{nnu:104592245; K19027 ZFYVE26 zinc finger FYVE domain-containing protein 26 - -}	{At2g25730; KOG1811 Predicted Zn2+-binding protein, contains FYVE domain R General function prediction only ;}	{NA}	{XM_010251484.2; PREDICTED: Nelumbo nucifera uncharacterized LOC104592245 (LOC104592245), transcript variant X1, mRNA}	{NA}	77,87
steponine(79)	transcript_HQ_YNMLP_transcript5996/f7p0/2787	1	0	{XP_010249572.1; PREDICTED: dolichyl-diphosphooligosaccharide--protein glycosyltransferase subunit STT3A [Nelumbo nucifera]}	{sp|Q6F2Z1|STT3A_ORYSJ; Dolichyl-diphosphooligosaccharide--protein glycosyltransferase subunit STT3A OS=Oryza sativa subsp. japonica GN=STT3A PE=2 SV=1}	{nnu:104592089; K07151 STT3 dolichyl-diphosphooligosaccharide--protein glycosyltransferase 2.4.99.18 ko00510; Metabolism; Glycan biosynthesis and metabolism; N-Glycan biosynthesis | ko00513; Metabolism; Glycan biosynthesis and metabolism; Various types of N-glycan biosynthesis | ko04141; Genetic Information Processing; Folding, sorting and degradation; Protein processing in endoplasmic reticulum}	{At5g19690; KOG2292 Oligosaccharyltransferase, STT3 subunit O Posttranslational modification, protein turnover, chaperones ;}	{GO:0004576; oligosaccharyl transferase activity; molecular_function GO:0016020; membrane; cellular_component GO:0006486; protein glycosylation; biological_process}	{XM_010251270.2; PREDICTED: Nelumbo nucifera dolichyl-diphosphooligosaccharide--protein glycosyltransferase subunit STT3A (LOC104592089), mRNA}	{PF02516:Oligosaccharyl transferase STT3 subunit}	79,83
berberine(77)	transcript_HQ_SCEZ_transcript2455/f2p0/3030	1	0	{EOX91227.1; BEL1-like homeodomain protein 2 isoform 1 [Theobroma cacao]}	{sp|Q9SW80|BLH2_ARATH; BEL1-like homeodomain protein 2 OS=Arabidopsis thaliana GN=BLH2 PE=1 SV=3}	{nnu:104595789; - - - - -}	{At4g36870; KOG0773 Transcription factor MEIS1 and related HOX domain proteins K Transcription ;}	{GO:0006355; regulation of transcription, DNA-dependent; biological_process GO:0003677; DNA binding; molecular_function}	{XM_015721271.1; PREDICTED: Ricinus communis BEL1-like homeodomain protein 4 (LOC8260592), mRNA}	{PF05920:Homeobox KN domain PF00046:Homeobox domain}	77,87
menisdaurin(81)	transcript_HQ_YNLB_transcript3368/f6p0/3083	1	0	{XP_010247191.1; PREDICTED: BEL1-like homeodomain protein 1 [Nelumbo nucifera]}	{sp|Q9SJ56|BLH1_ARATH; BEL1-like homeodomain protein 1 OS=Arabidopsis thaliana GN=BLH1 PE=1 SV=1}	{nnu:104590284; - - - - -}	{At2g35940; KOG0773 Transcription factor MEIS1 and related HOX domain proteins K Transcription ;}	{GO:0006355; regulation of transcription, DNA-dependent; biological_process GO:0003677; DNA binding; molecular_function}	{XM_012586118.1; PREDICTED: Gossypium raimondii BEL1-like homeodomain protein 1 (LOC105766599), transcript variant X3, mRNA}	{PF05920:Homeobox KN domain PF00046:Homeobox domain}	81,84
berberine(77)	transcript_HQ_SCEZ_transcript10712/f5p0/1954	1	0	{XP_010244503.1; PREDICTED: beta-1,6-galactosyltransferase GALT29A-like [Nelumbo nucifera]}	{sp|Q9SGD2|GT29A_ARATH; Beta-1,6-galactosyltransferase GALT29A OS=Arabidopsis thaliana GN=GALT29A PE=1 SV=1}	{nnu:104588318; - - - - -}	{At1g08280; KOG2692 Sialyltransferase G Carbohydrate transport and metabolism ;}	{GO:0008373; sialyltransferase activity; molecular_function GO:0006486; protein glycosylation; biological_process}	{XM_014638749.1; PREDICTED: Vigna radiata var. radiata beta-1,6-galactosyltransferase GALT29A (LOC106756356), transcript variant X3, mRNA}	{PF00777:Glycosyltransferase family 29 (sialyltransferase)}	77,87
steponine(79)	transcript_HQ_SCEZ_transcript17907/f2p0/1340	1	0	{XP_010263976.1; PREDICTED: caffeoylshikimate esterase-like isoform X1 [Nelumbo nucifera]}	{sp|Q9C942|CSE_ARATH; Caffeoylshikimate esterase OS=Arabidopsis thaliana GN=CSE PE=1 SV=1}	{nnu:104602105; K01054 MGLL acylglycerol lipase 3.1.1.23 ko00561; Metabolism; Lipid metabolism; Glycerolipid metabolism | ko04923; Organismal Systems; Endocrine system; Regulation of lipolysis in adipocytes | ko04723; Organismal Systems; Nervous system; Retrograde endocannabinoid signaling}	{At1g77420; KOG1455 Lysophospholipase I Lipid transport and metabolism ;}	{GO:0006508; proteolysis; biological_process GO:0008236; serine-type peptidase activity; molecular_function GO:0016787; hydrolase activity; molecular_function}	{XM_002282666.3; PREDICTED: Vitis vinifera caffeoylshikimate esterase (LOC100255956), mRNA}	{PF02129:X-Pro dipeptidyl-peptidase (S15 family) PF00326:Prolyl oligopeptidase family PF01738:Dienelactone hydrolase family PF02230:Phospholipase/Carboxylesterase}	79,83
steponine(79)	transcript_HQ_SCEZ_transcript4633/f2p0/2603	1	0	{XP_002511491.1; PREDICTED: probable beta-1,3-galactosyltransferase 19 [Ricinus communis]}	{sp|Q9LV16|B3GTJ_ARATH; Hydroxyproline O-galactosyltransferase GALT6 OS=Arabidopsis thaliana GN=GALT6 PE=2 SV=2}	{nnu:104596394; K20843 GALT2S hydroxyproline O-galactosyltransferase 2/3/4/5/6 2.4.1.- -}	{At5g62620; KOG2287 Galactosyltransferases G Carbohydrate transport and metabolism ;}	{GO:0008378; galactosyltransferase activity; molecular_function GO:0016020; membrane; cellular_component GO:0016757; transferase activity, transferring glycosyl groups; molecular_function GO:0030246; carbohydrate binding; molecular_function GO:0006486; protein glycosylation; biological_process}	{XM_010257533.2; PREDICTED: Nelumbo nucifera hydroxyproline O-galactosyltransferase GALT6-like (LOC104596394), mRNA}	{PF02434:Fringe-like PF01762:Galactosyltransferase PF00337:Galactoside-binding lectin}	79,83
menisdaurin(81)	transcript_HQ_YNMLP_transcript2028/f2p0/3700	1	0	{XP_010661562.1; PREDICTED: homeobox-leucine zipper protein ANTHOCYANINLESS 2 isoform X2 [Vitis vinifera]}	{sp|Q0WV12|ANL2_ARATH; Homeobox-leucine zipper protein ANTHOCYANINLESS 2 OS=Arabidopsis thaliana GN=ANL2 PE=2 SV=1}	{nnu:104596153; K09338 HD-ZIP homeobox-leucine zipper protein - -}	{NA}	{GO:0019901; protein kinase binding; molecular_function GO:0008289; lipid binding; molecular_function GO:0006355; regulation of transcription, DNA-dependent; biological_process GO:0003677; DNA binding; molecular_function}	{XM_011036795.1; PREDICTED: Populus euphratica homeobox-leucine zipper protein ANTHOCYANINLESS 2 (LOC105133017), mRNA}	{PF00046:Homeobox domain PF01852:START domain PF05920:Homeobox KN domain PF15898:cGMP-dependent protein kinase interacting domain}	81,84
menisdaurin(81)	transcript_HQ_YNMLP_transcript23695/f2p0/803	1	0	{XP_015888887.1; PREDICTED: metal tolerance protein 1 isoform X2 [Ziziphus jujuba]}	{sp|Q688R1|MTP1_ORYSJ; Metal tolerance protein 1 OS=Oryza sativa subsp. japonica GN=MTP1 PE=2 SV=1}	{atr:18447743; K14689 SLC30A2, ZNT2 solute carrier family 30 (zinc transporter), member 2 - -}	{At3g58810; KOG1482 Zn2+ transporter P Inorganic ion transport and metabolism ;}	{GO:0055085; transmembrane transport; biological_process GO:0008324; cation transmembrane transporter activity; molecular_function GO:0006812; cation transport; biological_process GO:0016021; integral to membrane; cellular_component}	{XM_017783526.1; PREDICTED: Gossypium arboreum metal tolerance protein 1-like (LOC108480503), transcript variant X3, mRNA}	{PF01545:Cation efflux family}	81,84
menisdaurin(81)	transcript_HQ_YNMLP_transcript15318/f3p0/1805	1	0	{XP_018805878.1; PREDICTED: equilibrative nucleotide transporter 3-like isoform X1 [Juglans regia]}	{sp|Q9M0Y3|ENT3_ARATH; Equilibrative nucleotide transporter 3 OS=Arabidopsis thaliana GN=ENT3 PE=1 SV=1}	{vvi:100261396; K15014 SLC29A1_2_3, ENT1_2_3 solute carrier family 29 (equilibrative nucleoside transporter), member 1/2/3 - -}	{At4g05120; KOG1479 Nucleoside transporter F Nucleotide transport and metabolism ;}	{GO:0016021; integral to membrane; cellular_component GO:0005337; nucleoside transmembrane transporter activity; molecular_function GO:0006810; transport; biological_process}	{XM_010659080.2; PREDICTED: Vitis vinifera equilibrative nucleotide transporter 3 (LOC100261396), transcript variant X2, mRNA}	{PF01733:Nucleoside transporter}	81,84
berberine(77)	transcript_HQ_YNLB_transcript5091/f3p0/2718	1	0	{XP_010254014.1; PREDICTED: probable glycosyltransferase At3g07620 [Nelumbo nucifera]}	{sp|Q9FFN2|GLYT3_ARATH; Probable glycosyltransferase At5g03795 OS=Arabidopsis thaliana GN=At5g03795 PE=3 SV=2}	{nnu:104595125; - - - - -}	{At4g32790; KOG1021 Acetylglucosaminyltransferase EXT1/exostosin 1 GMW Carbohydrate transport and metabolism ; Cell wall/membrane/envelope biogenesis ; Extracellular structures ;}	{NA}	{XM_010255715.2; PREDICTED: Nelumbo nucifera probable glycosyltransferase At3g07620 (LOC104595125), transcript variant X3, mRNA}	{NA}	77,87
steponine(79)	transcript_HQ_SCEZ_transcript7466/f2p0/2243	1	0	{XP_010244193.1; PREDICTED: protein NUCLEAR FUSION DEFECTIVE 4-like isoform X1 [Nelumbo nucifera]}	{sp|F4I9E1|NFD4_ARATH; Protein NUCLEAR FUSION DEFECTIVE 4 OS=Arabidopsis thaliana GN=NFD4 PE=3 SV=1}	{cit:102626277; - - - - -}	{NA}	{GO:0055085; transmembrane transport; biological_process GO:0016021; integral to membrane; cellular_component}	{XM_002519854.2; PREDICTED: Ricinus communis protein NUCLEAR FUSION DEFECTIVE 4 (LOC8280103), mRNA}	{PF07690:Major Facilitator Superfamily}	79,83
berberine(77)	transcript_HQ_SCEZ_transcript16228/f3p0/1556	1	0	{XP_010277529.1; PREDICTED: putative UDP-rhamnose:rhamnosyltransferase 1 [Nelumbo nucifera]}	{sp|Q66PF2|URT1_FRAAN; Putative UDP-rhamnose:rhamnosyltransferase 1 OS=Fragaria ananassa GN=GT4 PE=2 SV=1}	{vvi:100251545; - - - - -}	{At5g49690; KOG1192 UDP-glucuronosyl and UDP-glucosyl transferase GC Carbohydrate transport and metabolism ; Energy production and conversion ;}	{NA}	{NA}	{NA}	77,87
menisdaurin(81)	transcript_HQ_YNLB_transcript8367/f3p0/2355	1	0	{XP_010254754.1; PREDICTED: uncharacterized protein LOC104595635 isoform X1 [Nelumbo nucifera]}	{sp|P55606|Y4OU_SINFN; UPF0261 protein y4oU OS=Sinorhizobium fredii (strain NBRC 101917 / NGR234) GN=NGR_a02150 PE=3 SV=1}	{nnu:104595635; - - - - -}	{NA}	{GO:0055114; oxidation-reduction process; biological_process GO:0018580; nitronate monooxygenase activity; molecular_function}	{XM_010256452.1; PREDICTED: Nelumbo nucifera UPF0261 protein mll9388 (LOC104595635), transcript variant X1, mRNA}	{PF03060:Nitronate monooxygenase}	81,84
berberine(77)	transcript_HQ_SCEZ_transcript14882/f4p0/1653	1	0	{XP_010258646.1; PREDICTED: uncharacterized protein LOC104598324 isoform X1 [Nelumbo nucifera]}	{sp|Q888A4|RNLS_PSESM; Renalase OS=Pseudomonas syringae pv. tomato (strain ATCC BAA-871 / DC3000) GN=PSPTO_1126 PE=1 SV=1}	{nnu:104598324; K06955 K06955 uncharacterized protein - -}	{NA}	{GO:0003857; 3-hydroxyacyl-CoA dehydrogenase activity; molecular_function GO:0050660; flavin adenine dinucleotide binding; molecular_function GO:0008033; tRNA processing; biological_process GO:0006631; fatty acid metabolic process; biological_process GO:0050661; NADP binding; molecular_function GO:0071949; FAD binding; molecular_function GO:0004499; flavin-containing monooxygenase activity; molec…	{XM_006440956.1; Citrus clementina hypothetical protein (CICLE_v10020659mg) mRNA, complete cds}	{PF01266:FAD dependent oxidoreductase PF07992:Pyridine nucleotide-disulphide oxidoreductase PF01593:Flavin containing amine oxidoreductase PF02737:3-hydroxyacyl-CoA dehydrogenase, NAD binding domain PF01494:FAD binding domain PF12831:FAD dependent oxidoreductase PF01134:Glucose inhibited division protein A PF00070:Pyridine nucleotide-disulphide oxidoreductase PF01210:NAD-dependent glycerol-3-phos…	77,87
steponine(79)	transcript_HQ_YNMLP_transcript507/f2p0/4606	1	0	{XP_010250822.1; PREDICTED: uncharacterized protein LOC104592946 [Nelumbo nucifera]}	{NA}	{nnu:104592946; - - - - -}	{NA}	{GO:0003677; DNA binding; molecular_function}	{XM_016038892.1; PREDICTED: Ziziphus jujuba microtubule-associated protein futsch (LOC107428366), mRNA}	{PF13922:PHD domain of transcriptional enhancer, Asx}	79,83
berberine(77)	transcript_HQ_SCEZ_transcript12059/f2p0/1855	1	0	{XP_015881197.1; PREDICTED: uncharacterized protein LOC107417137 [Ziziphus jujuba]}	{sp|Q8BY79|S35G1_MOUSE; Solute carrier family 35 member G1 OS=Mus musculus GN=Slc35g1 PE=2 SV=1}	{rcu:8282554; - - - - -}	{7299451; KOG4510 Permease of the drug/metabolite transporter (DMT) superfamily R General function prediction only ;}	{GO:0009055; NA GO:0016021; integral to membrane; cellular_component GO:0016020; membrane; cellular_component GO:0016491; oxidoreductase activity; molecular_function}	{NA}	{PF00892:EamA-like transporter family PF00032:Cytochrome b(C-terminal)/b6/petD}	77,87
menisdaurin(81)	transcript_HQ_SCJY_transcript22748/f2p0/497	1	0	{KNA16504.1; hypothetical protein SOVF_088550 [Spinacia oleracea]}	{sp|Q9LX33|FNTA_ARATH; Protein farnesyltransferase/geranylgeranyltransferase type-1 subunit alpha OS=Arabidopsis thaliana GN=FTA PE=1 SV=2}	{bvg:104888775; K05955 FNTA protein farnesyltransferase/geranylgeranyltransferase type-1 subunit alpha [EC:2.5.1.58 2.5.1.59] 2.5.1.58,2.5.1.59 ko00900; Metabolism; Metabolism of terpenoids and polyketides; Terpenoid backbone biosynthesis}	{At3g59380; KOG0530 Protein farnesyltransferase, alpha subunit/protein geranylgeranyltransferase type I, alpha subunit O Posttranslational modification, protein turnover, chaperones ;}	{GO:0018342; protein prenylation; biological_process GO:0008318; protein prenyltransferase activity; molecular_function}	{NA}	{PF01239:Protein prenyltransferase alpha subunit repeat}	81,84
berberine(77)	transcript_HQ_SCEZ_transcript18028/f2p0/1390	1	0	{XP_019051441.1; PREDICTED: ultraviolet-B receptor UVR8 isoform X1 [Nelumbo nucifera]}	{sp|Q9FN03|UVR8_ARATH; Ultraviolet-B receptor UVR8 OS=Arabidopsis thaliana GN=UVR8 PE=1 SV=1}	{vvi:100246710; - - - - -}	{At1g27060; KOG1426 FOG: RCC1 domain S Function unknown ;}	{GO:0004866; endopeptidase inhibitor activity; molecular_function}	{XM_010684973.1; PREDICTED: Beta vulgaris subsp. vulgaris ultraviolet-B receptor UVR8 (LOC104897987), transcript variant X2, mRNA}	{PF00207:Alpha-2-macroglobulin family}	77,87
steponine(79)	transcript_HQ_SCEZ_transcript13376/f3p0/1766	1	0	{XP_002283625.1; PREDICTED: probable beta-1,4-xylosyltransferase IRX9H [Vitis vinifera]}	{sp|Q9SXC4|IRX9H_ARATH; Probable beta-1,4-xylosyltransferase IRX9H OS=Arabidopsis thaliana GN=IRX9H PE=2 SV=2}	{nnu:104595582; K20869 IRX9 putative beta-1,4-xylosyltransferase IRX9 2.4.2.- -}	{At1g27600; KOG1476 Beta-1,3-glucuronyltransferase B3GAT1/SQV-8 O Posttranslational modification, protein turnover, chaperones ;}	{GO:0016020; membrane; cellular_component GO:0015018; galactosylgalactosylxylosylprotein 3-beta-glucuronosyltransferase activity; molecular_function}	{XM_004501011.2; PREDICTED: Cicer arietinum probable beta-1,4-xylosyltransferase IRX9H (LOC101492330), mRNA}	{PF03360:Glycosyltransferase family 43}	79,83
menisdaurin(81)	transcript_HQ_YNMLP_transcript483/f5p0/4602	1	0	{ABA95319.1; retrotransposon protein, putative, unclassified [Oryza sativa Japonica Group]}	{sp|P04323|POL3_DROME; Retrovirus-related Pol polyprotein from transposon 17.6 OS=Drosophila melanogaster GN=pol PE=3 SV=1}	{zma:103648418; - - - - -}	{At3g11970_2; KOG0017 FOG: Transposon-encoded proteins with TYA, reverse transcriptase, integrase domains in various combinations R General function prediction only ;}	{NA}	{HG975451.1; Solanum pennellii chromosome ch12, complete genome}	{NA}	81,84
berberine(77)	transcript_HQ_SCEZ_transcript17162/f2p0/1489	1	0	{XP_011006308.1; PREDICTED: geranylgeranyl diphosphate reductase, chloroplastic-like [Populus euphratica]}	{sp|Q9CA67|CHLP_ARATH; Geranylgeranyl diphosphate reductase, chloroplastic OS=Arabidopsis thaliana GN=CHLP PE=1 SV=1}	{jcu:105629331; K10960 chlP, bchP geranylgeranyl diphosphate/geranylgeranyl-bacteriochlorophyllide a reductase [EC:1.3.1.83 1.3.1.111] 1.3.1.83,1.3.1.111 ko00860; Metabolism; Metabolism of cofactors and vitamins; Porphyrin and chlorophyll metabolism | ko00900; Metabolism; Metabolism of terpenoids and polyketides; Terpenoid backbone biosynthesis}	{NA}	{GO:0016491; oxidoreductase activity; molecular_function GO:0071949; FAD binding; molecular_function GO:0050660; flavin adenine dinucleotide binding; molecular_function GO:0055114; oxidation-reduction process; biological_process GO:0008033; tRNA processing; biological_process}	{XM_007015468.2; PREDICTED: Theobroma cacao geranylgeranyl diphosphate reductase, chloroplastic (LOC18590126), mRNA}	{PF01266:FAD dependent oxidoreductase PF07992:Pyridine nucleotide-disulphide oxidoreductase PF12831:FAD dependent oxidoreductase PF01134:Glucose inhibited division protein A PF00070:Pyridine nucleotide-disulphide oxidoreductase PF01494:FAD binding domain}	77,87
steponine(79)	transcript_HQ_SCEZ_transcript15394/f3p0/1625	1	0	{XP_015583751.1; PREDICTED: autophagy-related protein 18b isoform X2 [Ricinus communis]}	{sp|Q8H1Q8|AT18B_ARATH; Autophagy-related protein 18b OS=Arabidopsis thaliana GN=ATG18B PE=2 SV=2}	{rcu:8258873; K17908 WIPI, ATG18 autophagy-related protein 18 - ko04140; Cellular Processes; Transport and catabolism; Autophagy - animal | ko04138; Cellular Processes; Transport and catabolism; Autophagy - yeast}	{At4g30510; KOG2110 Uncharacterized conserved protein, contains WD40 repeats S Function unknown ;}	{NA}	{NA}	{NA}	79,83
berberine(77)	transcript_HQ_HBZL_transcript9094/f2p0/2135	1	0	{XP_010255553.1; PREDICTED: glycosyltransferase family 92 protein RCOM_0530710-like [Nelumbo nucifera]}	{sp|B9S2H4|Y232_RICCO; Glycosyltransferase family 92 protein RCOM_0530710 OS=Ricinus communis GN=RCOM_0699480 PE=3 SV=1}	{nnu:104596187; - - - - -}	{NA}	{NA}	{XM_002271841.3; PREDICTED: Vitis vinifera glycosyltransferase family 92 protein RCOM_0530710 (LOC100258721), mRNA}	{NA}	77,87
berberine(77)	transcript_HQ_SCEZ_transcript16855/f3p0/1479	1	0	{XP_002268717.2; PREDICTED: CMP-sialic acid transporter 5 [Vitis vinifera]}	{sp|Q8LES0|CSTR5_ARATH; CMP-sialic acid transporter 5 OS=Arabidopsis thaliana GN=At5g65000 PE=2 SV=1}	{vvi:100264881; K15272 SLC35A1_2_3 solute carrier family 35 (UDP-sugar transporter), member A1/2/3 - -}	{At5g65000; KOG2234 Predicted UDP-galactose transporter G Carbohydrate transport and metabolism ;}	{GO:0016020; membrane; cellular_component GO:0015649; 2-keto-3-deoxygluconate:hydrogen symporter activity; molecular_function GO:0016021; integral to membrane; cellular_component GO:0000139; Golgi membrane; cellular_component GO:0005351; sugar:hydrogen symporter activity; molecular_function GO:0008643; carbohydrate transport; biological_process GO:0046411; 2-keto-3-deoxygluconate transport; biolo…	{XM_011024490.1; PREDICTED: Populus euphratica CMP-sialic acid transporter 5-like (LOC105124464), mRNA}	{PF03812:2-keto-3-deoxygluconate permease PF00892:EamA-like transporter family PF04142:Nucleotide-sugar transporter}	77,87
menisdaurin(81)	transcript_HQ_YNMLP_transcript13450/f3p0/2011	1	0	{XP_010930069.1; PREDICTED: protein DETOXIFICATION 40 isoform X1 [Elaeis guineensis]}	{sp|Q9LVD9|DTX40_ARATH; Protein DETOXIFICATION 40 OS=Arabidopsis thaliana GN=DTX40 PE=1 SV=1}	{egu:105051369; K03327 TC.MATE, SLC47A, norM, mdtK, dinF multidrug resistance protein, MATE family - -}	{At3g21690; KOG1347 Uncharacterized membrane protein, predicted efflux pump R General function prediction only ;}	{GO:0016020; membrane; cellular_component GO:0015297; antiporter activity; molecular_function GO:0015238; drug transmembrane transporter activity; molecular_function GO:0055085; transmembrane transport; biological_process GO:0006855; drug transmembrane transport; biological_process}	{XM_012235966.1; PREDICTED: Jatropha curcas protein TRANSPARENT TESTA 12-like (LOC105649344), mRNA}	{PF01554:MatE}	81,84
steponine(79)	transcript_HQ_YNMLP_transcript13908/f2p0/1937	1	0	{XP_010254583.1; PREDICTED: protein CLT2, chloroplastic [Nelumbo nucifera]}	{sp|A1L4X0|CLT2_ARATH; Protein CLT2, chloroplastic OS=Arabidopsis thaliana GN=CLT2 PE=2 SV=1}	{nnu:104595526; - - - - -}	{NA}	{GO:0055085; transmembrane transport; biological_process}	{XM_010256281.2; PREDICTED: Nelumbo nucifera protein CLT2, chloroplastic (LOC104595526), mRNA}	{PF08449:UAA transporter family}	79,83
berberine(77)	transcript_HQ_HBZL_transcript105/f2p0/5898	1	0	{XP_010242545.1; PREDICTED: piezo-type mechanosensitive ion channel homolog isoform X3 [Nelumbo nucifera]}	{sp|F4IN58|PIEZO_ARATH; Piezo-type mechanosensitive ion channel homolog OS=Arabidopsis thaliana GN=At2g48060/At2g48040/At2g48050 PE=2 SV=1}	{rcu:8285854; - - - - -}	{At2g48050; KOG1893 Uncharacterized conserved protein S Function unknown ;}	{NA}	{XM_010244244.1; PREDICTED: Nelumbo nucifera piezo-type mechanosensitive ion channel homolog (LOC104586869), transcript variant X4, mRNA}	{NA}	77,87
steponine(79)	transcript_HQ_YNLB_transcript2/f2p0/10750	1	0	{XP_010247117.1; PREDICTED: chromatin structure-remodeling complex protein SYD isoform X2 [Nelumbo nucifera]}	{sp|F4IHS2|SYD_ARATH; Chromatin structure-remodeling complex protein SYD OS=Arabidopsis thaliana GN=SYD PE=1 SV=1}	{egu:105042102; - - - - -}	{At2g28290; KOG0386 Chromatin remodeling complex SWI/SNF, component SWI2 and related ATPases (DNA/RNA helicase superfamily) BK Chromatin structure and dynamics ; Transcription ;}	{GO:0003676; nucleic acid binding; molecular_function GO:0042393; histone binding; molecular_function GO:0008384; IkappaB kinase activity; molecular_function GO:0005524; ATP binding; molecular_function GO:0003677; DNA binding; molecular_function GO:0004003; ATP-dependent DNA helicase activity; molecular_function GO:0016787; hydrolase activity; molecular_function}	{XM_010248815.2; PREDICTED: Nelumbo nucifera chromatin structure-remodeling complex protein SYD (LOC104590239), transcript variant X2, mRNA}	{PF06733:DEAD_2 PF12179:I-kappa-kinase-beta NEMO binding domain PF14619:Snf2-ATP coupling, chromatin remodelling complex PF00176:SNF2 family N-terminal domain PF04851:Type III restriction enzyme, res subunit PF00270:DEAD/DEAH box helicase}	79,83
menisdaurin(81)	transcript_HQ_YNLB_transcript16869/f2p0/1373	1	0	{XP_010267145.1; PREDICTED: senescence/dehydration-associated protein At4g35985, chloroplastic-like [Nelumbo nucifera]}	{sp|Q9SD22|SDEH3_ARATH; Senescence/dehydration-associated protein At3g51250 OS=Arabidopsis thaliana GN=At3g51250 PE=2 SV=1}	{vvi:100259546; - - - - -}	{NA}	{NA}	{XM_017383580.1; PREDICTED: Daucus carota subsp. sativus uncharacterized LOC108211872 (LOC108211872), mRNA}	{NA}	81,84
berberine(77)	transcript_HQ_YNLB_transcript20054/f3p0/952	1	0	{ALM95511.1; FRUITFULL2 protein [Nigella damascena]}	{sp|B4YPW6|AP1A_BRAOA; Floral homeotic protein APETALA 1 A OS=Brassica oleracea var. alboglabra GN=AP1A PE=3 SV=1}	{lang:109344686; K09264 K09264 MADS-box transcription factor, plant - -; lang:109344686; - - - - -}	{At1g69120; KOG0014 MADS box transcription factor K Transcription ;}	{GO:0009288; bacterial-type flagellum; cellular_component GO:0005680; anaphase-promoting complex; cellular_component GO:0006260; DNA replication; biological_process GO:0005634; nucleus; cellular_component GO:0005737; cytoplasm; cellular_component GO:0090266; regulation of mitotic cell cycle spindle assembly checkpoint; biological_process GO:0003700; sequence-specific DNA binding transcription fac…	{KF500171.1; Helleborus x hybridus FRUITFULL-like protein (FL2) mRNA, partial cds}	{PF02601:Exonuclease VII, large subunit PF06248:Centromere/kinetochore Zw10 PF00170:bZIP transcription factor PF07195:Flagellar hook-associated protein 2 C-terminus PF15243:Anaphase-promoting complex subunit 15 PF06156:Protein of unknown function (DUF972) PF03462:PCRF domain PF01486:K-box region PF01166:TSC-22/dip/bun family}	77,87
berberine(77)	transcript_HQ_HBZL_transcript5082/f2p0/2350	1	0	{XP_010276339.1; PREDICTED: glucan endo-1,3-beta-glucosidase 4 isoform X2 [Nelumbo nucifera]}	{sp|Q94CD8|E134_ARATH; Glucan endo-1,3-beta-glucosidase 4 OS=Arabidopsis thaliana GN=At3g13560 PE=1 SV=1}	{nnu:104597635; K19892 GN4 glucan endo-1,3-beta-glucosidase 4 3.2.1.39 ko00500; Metabolism; Carbohydrate metabolism; Starch and sucrose metabolism}	{NA}	{GO:0005975; carbohydrate metabolic process; biological_process GO:0004553; hydrolase activity, hydrolyzing O-glycosyl compounds; molecular_function}	{XM_010278036.2; PREDICTED: Nelumbo nucifera glucan endo-1,3-beta-glucosidase 4 (LOC104611111), transcript variant X8, mRNA}	{PF00332:Glycosyl hydrolases family 17}	77,87
menisdaurin(81)	transcript_HQ_SCEZ_transcript15820/f2p0/1600	1	0	{XP_018438036.1; PREDICTED: probable sugar phosphate/phosphate translocator At5g25400 [Raphanus sativus]}	{sp|Q3E6T0|PT525_ARATH; Probable sugar phosphate/phosphate translocator At5g25400 OS=Arabidopsis thaliana GN=At5g25400 PE=2 SV=1}	{nnu:104595374; - - - - -}	{At5g25400; KOG1441 Glucose-6-phosphate/phosphate and phosphoenolpyruvate/phosphate antiporter GE Carbohydrate transport and metabolism ; Amino acid transport and metabolism ;}	{GO:0016021; integral to membrane; cellular_component GO:0016020; membrane; cellular_component}	{XM_002309580.2; Populus trichocarpa phosphate translocator-related family protein (POPTR_0006s26870g) mRNA, complete cds}	{PF00892:EamA-like transporter family}	81,84
berberine(77)	transcript_HQ_SCEZ_transcript2149/f2p0/3140	1	0	{XP_010258082.1; PREDICTED: probable methyltransferase PMT5 [Nelumbo nucifera]}	{sp|Q3EC77|PMT5_ARATH; Probable methyltransferase PMT5 OS=Arabidopsis thaliana GN=At2g03480 PE=2 SV=2}	{nnu:104597964; - - - - -}	{NA}	{GO:0008168; methyltransferase activity; molecular_function GO:0008152; NA}	{XM_010259781.2; PREDICTED: Nelumbo nucifera probable methyltransferase PMT5 (LOC104597964), transcript variant X3, mRNA}	{PF05175:Methyltransferase small domain PF08241:Methyltransferase domain PF03141:Putative S-adenosyl-L-methionine-dependent methyltransferase}	77,87
berberine(77)	transcript_HQ_HBZL_transcript712/f2p0/4012	1	0	{XP_010255312.1; PREDICTED: methyltransferase-like protein 1 [Nelumbo nucifera]}	{sp|Q94AI4|METL1_ARATH; Methyltransferase-like protein 1 OS=Arabidopsis thaliana GN=EMB1691 PE=2 SV=1}	{nnu:104596028; - - - - -}	{At4g09980; KOG2097 Predicted N6-adenine methylase involved in transcription regulation K Transcription ;}	{GO:0006139; nucleobase, nucleoside, nucleotide and nucleic acid metabolic process; biological_process GO:0008168; methyltransferase activity; molecular_function}	{XM_010257010.2; PREDICTED: Nelumbo nucifera methyltransferase-like protein 1 (LOC104596028), mRNA}	{PF05063:MT-A70 }	77,87
steponine(79)	transcript_HQ_YNLB_transcript17115/f2p0/1355	1	0	{XP_010257400.1; PREDICTED: uncharacterized protein LOC104597515 isoform X3 [Nelumbo nucifera]}	{sp|Q04869|YM94_YEAST; Uncharacterized protein YMR315W OS=Saccharomyces cerevisiae (strain ATCC 204508 / S288c) GN=YMR315W PE=1 SV=1}	{nnu:104597515; - - - - -}	{At3g20790; KOG2742 Predicted oxidoreductase R General function prediction only ;}	{GO:0008152; NA GO:0055114; oxidation-reduction process; biological_process GO:0016491; oxidoreductase activity; molecular_function}	{XM_008245373.2; PREDICTED: Prunus mume uncharacterized LOC103341817 (LOC103341817), mRNA}	{PF02894:Oxidoreductase family, C-terminal alpha/beta domain PF01408:Oxidoreductase family, NAD-binding Rossmann fold}	79,83
menisdaurin(81)	transcript_HQ_SCJY_transcript3806/f2p0/2662	1	0	{XP_010261215.1; PREDICTED: sulfate transporter 1.3-like [Nelumbo nucifera]}	{sp|Q9FEP7|SUT13_ARATH; Sulfate transporter 1.3 OS=Arabidopsis thaliana GN=SULTR1;3 PE=2 SV=1}	{nnu:104600090; K17470 SULTR1 sulfate transporter 1, high-affinity - -}	{At4g08620; KOG0236 Sulfate/bicarbonate/oxalate exchanger SAT-1 and related transporters (SLC26 family) P Inorganic ion transport and metabolism ;}	{GO:0016021; integral to membrane; cellular_component GO:0008272; sulfate transport; biological_process GO:0015116; sulfate transmembrane transporter activity; molecular_function}	{XM_007018796.2; PREDICTED: Theobroma cacao sulfate transporter 1.3 (LOC18592206), transcript variant X5, mRNA}	{PF00916:Sulfate permease family}	81,84
berberine(77)	transcript_HQ_SCJY_transcript7633/f2p0/2218	1	0	{XP_010273272.1; PREDICTED: probable methyltransferase PMT7 [Nelumbo nucifera]}	{sp|Q9LZA4|PMT7_ARATH; Probable methyltransferase PMT7 OS=Arabidopsis thaliana GN=At5g04060 PE=2 SV=1}	{cic:CICLE_v10004589mg; - - - - -}	{NA}	{GO:0008152; NA GO:0008168; methyltransferase activity; molecular_function}	{XM_018121984.1; PREDICTED: Theobroma cacao probable methyltransferase PMT7 (LOC18598815), mRNA}	{PF08241:Methyltransferase domain PF03141:Putative S-adenosyl-L-methionine-dependent methyltransferase}	77,87
steponine(79)	transcript_HQ_SCEZ_transcript11092/f3p0/1918	1	0	{XP_010276332.1; PREDICTED: glucan endo-1,3-beta-glucosidase 4 isoform X1 [Nelumbo nucifera]}	{sp|Q94CD8|E134_ARATH; Glucan endo-1,3-beta-glucosidase 4 OS=Arabidopsis thaliana GN=At3g13560 PE=1 SV=1}	{nnu:104597635; K19892 GN4 glucan endo-1,3-beta-glucosidase 4 3.2.1.39 ko00500; Metabolism; Carbohydrate metabolism; Starch and sucrose metabolism}	{NA}	{GO:0005975; carbohydrate metabolic process; biological_process GO:0004553; hydrolase activity, hydrolyzing O-glycosyl compounds; molecular_function}	{NA}	{PF00332:Glycosyl hydrolases family 17}	79,83
menisdaurin(81)	transcript_HQ_YNLB_transcript14105/f2p0/1730	1	0	{XP_018805878.1; PREDICTED: equilibrative nucleotide transporter 3-like isoform X1 [Juglans regia]}	{sp|Q9M0Y3|ENT3_ARATH; Equilibrative nucleotide transporter 3 OS=Arabidopsis thaliana GN=ENT3 PE=1 SV=1}	{vvi:100261396; K15014 SLC29A1_2_3, ENT1_2_3 solute carrier family 29 (equilibrative nucleoside transporter), member 1/2/3 - -}	{At4g05120; KOG1479 Nucleoside transporter F Nucleotide transport and metabolism ;}	{GO:0016021; integral to membrane; cellular_component GO:0006810; transport; biological_process GO:0005337; nucleoside transmembrane transporter activity; molecular_function}	{XM_010659080.2; PREDICTED: Vitis vinifera equilibrative nucleotide transporter 3 (LOC100261396), transcript variant X2, mRNA}	{PF01733:Nucleoside transporter}	81,84
menisdaurin(81)	transcript_HQ_YNMLP_transcript5065/f7p0/2910	1	0	{XP_010253168.1; PREDICTED: zinc finger BED domain-containing protein RICESLEEPER 2-like isoform X1 [Nelumbo nucifera]}	{sp|P08770|TRA1_MAIZE; Putative AC transposase OS=Zea mays PE=2 SV=2}	{nnu:104594540; - - - - -}	{At1g42110; KOG1121 Tam3-transposase (Ac family) L Replication, recombination and repair ;}	{GO:0003677; DNA binding; molecular_function}	{NA}	{PF02892:BED zinc finger}	81,84
steponine(79)	transcript_HQ_SCEZ_transcript2351/f2p0/3059	1	0	{XP_008375197.1; PREDICTED: rust resistance kinase Lr10-like [Malus domestica]}	{sp|Q9FF31|LRL21_ARATH; LEAF RUST 10 DISEASE-RESISTANCE LOCUS RECEPTOR-LIKE PROTEIN KINASE-like 2.1 OS=Arabidopsis thaliana GN=LRK10L-2.1 PE=3 SV=1}	{egu:105039746; K04733 IRAK4 interleukin-1 receptor-associated kinase 4 2.7.11.1 ko04064; Environmental Information Processing; Signal transduction; NF-kappa B signaling pathway | ko04620; Organismal Systems; Immune system; Toll-like receptor signaling pathway | ko04624; Organismal Systems; Immune system; Toll and Imd signaling pathway | ko04621; Organismal Systems; Immune system; NOD-like recept…	{At5g38260; KOG1187 Serine/threonine protein kinase T Signal transduction mechanisms ;}	{GO:0005524; ATP binding; molecular_function GO:0006468; protein phosphorylation; biological_process GO:0004672; protein kinase activity; molecular_function}	{NA}	{PF00069:Protein kinase domain PF07714:Protein tyrosine kinase}	79,83
steponine(79)	transcript_HQ_SCEZ_transcript7618/f2p0/2221	1	0	{XP_010241170.1; PREDICTED: putative glycerol-3-phosphate transporter 4 [Nelumbo nucifera]}	{sp|O23596|GLPT4_ARATH; Putative glycerol-3-phosphate transporter 4 OS=Arabidopsis thaliana GN=At4g17550 PE=3 SV=2}	{vvi:100251916; K13783 SLC37A1_2 MFS transporter, OPA family, solute carrier family 37 (glycerol-3-phosphate transporter), member 1/2 - -}	{At4g17550; KOG2533 Permease of the major facilitator superfamily G Carbohydrate transport and metabolism ;}	{GO:0055085; transmembrane transport; biological_process GO:0016021; integral to membrane; cellular_component GO:0022857; transmembrane transporter activity; molecular_function}	{XM_019335164.1; PREDICTED: Ipomoea nil putative glycerol-3-phosphate transporter 4 (LOC109185181), mRNA}	{PF07690:Major Facilitator Superfamily PF00083:Sugar (and other) transporter}	79,83
steponine(79)	transcript_HQ_SCEZ_transcript17949/f2p0/1403	1	0	{XP_010277842.1; PREDICTED: uncharacterized protein LOC104612199 [Nelumbo nucifera]}	{NA}	{egr:104455112; - - - - -}	{NA}	{GO:0045454; cell redox homeostasis; biological_process}	{XM_018989742.1; PREDICTED: Juglans regia uncharacterized LOC109009302 (LOC109009302), transcript variant X2, mRNA}	{PF00085:Thioredoxin}	79,83
magnoflorine(15)	transcript_HQ_SCJY_transcript12499/f3p0/1669	0.880602	0.0486287	{XP_010656399.1; PREDICTED: probable receptor-like protein kinase At5g20050 [Vitis vinifera]}	{sp|Q94C25|Y5005_ARATH; Probable receptor-like protein kinase At5g20050 OS=Arabidopsis thaliana GN=At5g20050 PE=2 SV=1}	{vvi:104880655; - - - - -}	{At5g20050; KOG1187 Serine/threonine protein kinase T Signal transduction mechanisms ;}	{GO:0006468; protein phosphorylation; biological_process GO:0004672; protein kinase activity; molecular_function GO:0005524; ATP binding; molecular_function GO:0016773; phosphotransferase activity, alcohol group as acceptor; molecular_function GO:0019748; secondary metabolic process; biological_process}	{NA}	{PF04655:Aminoglycoside/hydroxyurea antibiotic resistance kinase PF00069:Protein kinase domain PF05445:Poxvirus serine/threonine protein kinase PF07714:Protein tyrosine kinase}	15,28,46a,46b	B
magnoflorine(15)	transcript_HQ_SCJY_transcript14458/f2p0/1441	0.940656	0.0171986	{XP_017975762.1; PREDICTED: probable endo-1,3(4)-beta-glucanase ARB_01444 [Theobroma cacao]}	{sp|D4AZ24|ENG1_ARTBC; Probable endo-1,3(4)-beta-glucanase ARB_01444 OS=Arthroderma benhamiae (strain ATCC MYA-4681 / CBS 112371) GN=ARB_01444 PE=1 SV=1}	{gra:105788654; K01180 E3.2.1.6 endo-1,3(4)-beta-glucanase 3.2.1.6 -}	{At5g15870; KOG2254 Predicted endo-1,3-beta-glucanase G Carbohydrate transport and metabolism ;}	{GO:0052861; NA}	{XM_006430774.1; Citrus clementina hypothetical protein (CICLE_v10011145mg) mRNA, complete cds}	{PF03639:Glycosyl hydrolase family 81 }	15,28,46a,46b
magnoflorine(15)	transcript_HQ_SCEZ_transcript15538/f2p0/1622	0.880146	0.0489044	{XP_012090473.1; PREDICTED: hexose carrier protein HEX6 isoform X1 [Jatropha curcas]}	{sp|Q07423|HEX6_RICCO; Hexose carrier protein HEX6 OS=Ricinus communis GN=HEX6 PE=2 SV=1}	{sind:105160629; - - - - -}	{At5g61520; KOG0254 Predicted transporter (major facilitator superfamily) R General function prediction only ;}	{GO:0055085; transmembrane transport; biological_process GO:0016021; integral to membrane; cellular_component GO:0022857; transmembrane transporter activity; molecular_function}	{NA}	{PF00083:Sugar (and other) transporter PF07690:Major Facilitator Superfamily}	15,28,46a,46b
magnoflorine(15)	transcript_HQ_SCEZ_transcript18405/f2p0/1335	0.89836	0.0382997	{XP_010243779.1; PREDICTED: probable ribose-5-phosphate isomerase 2 [Nelumbo nucifera]}	{sp|Q9ZU38|RPI2_ARATH; Probable ribose-5-phosphate isomerase 2 OS=Arabidopsis thaliana GN=RPI2 PE=1 SV=1}	{pmum:103341565; K01807 rpiA ribose 5-phosphate isomerase A 5.3.1.6 ko01200; Metabolism; Global and overview maps; Carbon metabolism | ko01230; Metabolism; Global and overview maps; Biosynthesis of amino acids | ko00030; Metabolism; Carbohydrate metabolism; Pentose phosphate pathway | ko00710; Metabolism; Energy metabolism; Carbon fixation in photosynthetic organisms}	{At2g01290; KOG3075 Ribose 5-phosphate isomerase G Carbohydrate transport and metabolism ;}	{GO:0009052; pentose-phosphate shunt, non-oxidative branch; biological_process GO:0004751; ribose-5-phosphate isomerase activity; molecular_function}	{XM_019379865.1; PREDICTED: Nicotiana attenuata probable ribose-5-phosphate isomerase 2 (LOC109215754), mRNA}	{PF06026:Ribose 5-phosphate isomerase A (phosphoriboisomerase A)}	15,28,46a,46b
magnoflorine(15)	transcript_HQ_YNLB_transcript24794/f5p0/417	0.943308	0.0160651	{XP_019418912.1; PREDICTED: enoyl-CoA delta isomerase 2, peroxisomal-like [Lupinus angustifolius]}	{NA}	{rcu:8276162; - - - - -}	{NA}	{GO:0003824; NA GO:0008152; NA}	{NA}	{PF00378:Enoyl-CoA hydratase/isomerase}	15,28,46a,46b
thalsimine(68)	transcript_HQ_SCJY_transcript4616/f2p0/2530	0.881788	0.0479149	{XP_010257011.1; PREDICTED: protein RETICULATA-RELATED 5, chloroplastic-like [Nelumbo nucifera]}	{sp|Q8RWG3|RER6_ARATH; Protein RETICULATA-RELATED 6, chloroplastic OS=Arabidopsis thaliana GN=RER6 PE=2 SV=1}	{nnu:104597253; - - - - -}	{NA}	{NA}	{XM_010258709.2; PREDICTED: Nelumbo nucifera protein RETICULATA-RELATED 5, chloroplastic-like (LOC104597253), mRNA}	{NA}	28,46a,46b,68
thalsimine(68)	transcript_HQ_SCJY_transcript1167/f2p0/3364	0.879459	0.0493203	{XP_010527937.1; PREDICTED: serine/threonine-protein kinase STY46-like [Tarenaya hassleriana]}	{sp|P93755|C3H30_ARATH; Zinc finger CCCH domain-containing protein 30 OS=Arabidopsis thaliana GN=At2g41900 PE=1 SV=2}	{thj:104805177; - - - - -}	{At1g14000; KOG0192 Tyrosine kinase specific for activated (GTP-bound) p21cdc42Hs T Signal transduction mechanisms ;}	{GO:0005515; protein binding; molecular_function}	{XM_002522436.2; PREDICTED: Ricinus communis serine/threonine-protein kinase STY46 (LOC8281850), mRNA}	{PF13606:Ankyrin repeat PF00023:Ankyrin repeat}	28,46a,46b,68
thalsimine(68)	transcript_HQ_SCJY_transcript784/f2p0/3544	0.87961	0.0492285	{GAV83265.1; LOW QUALITY PROTEIN: F-box domain-containing protein/Cupin_8 domain-containing protein, partial [Cephalotus follicularis]}	{sp|Q9M9E8|FB92_ARATH; F-box protein At1g78280 OS=Arabidopsis thaliana GN=At1g78280 PE=2 SV=3}	{egu:105041931; - - - - -}	{At1g78280; KOG2130 Phosphatidylserine-specific receptor PtdSerR, contains JmjC domain BT Chromatin structure and dynamics ; Signal transduction mechanisms ;}	{GO:0005515; protein binding; molecular_function}	{XM_010274702.2; PREDICTED: Nelumbo nucifera F-box protein At1g78280 (LOC104608655), mRNA}	{PF12937:F-box-like PF00646:F-box domain}	28,46a,46b,68
thalsimine(68)	transcript_HQ_SCEZ_transcript20113/f2p0/1275	0.882879	0.0472613	{XP_010266556.1; PREDICTED: B2 protein-like [Nelumbo nucifera]}	{sp|P37707|B2_DAUCA; B2 protein OS=Daucus carota PE=2 SV=1}	{gra:105791332; - - - - -}	{NA}	{NA}	{XM_016040573.1; PREDICTED: Ziziphus jujuba probable cyclin-dependent serine/threonine-protein kinase DDB_G0292550 (LOC107429822), mRNA}	{NA}	28,46a,46b,68
magnoflorine(15)	transcript_HQ_YNMLP_transcript25896/f2p0/594	0.883815	0.0467025	{XP_019054929.1; PREDICTED: protein argonaute 1B-like [Nelumbo nucifera]}	{sp|Q9SJK3|AGO5_ARATH; Protein argonaute 5 OS=Arabidopsis thaliana GN=AGO5 PE=1 SV=2}	{sbi:SORBI_01g011880; K11593 ELF2C, AGO eukaryotic translation initiation factor 2C - -}	{At2g27880; KOG1041 Translation initiation factor 2C (eIF-2C) and related proteins J Translation, ribosomal structure and biogenesis ;}	{NA}	{NA}	{NA}	15,28,46a,46b
magnoflorine(15)	transcript_HQ_SCJY_transcript7803/f8p0/2174	0.918444	0.0276144	{XP_009356181.1; PREDICTED: ATP synthase subunit beta, mitochondrial-like [Pyrus x bretschneideri]}	{sp|P19023|ATPBM_MAIZE; ATP synthase subunit beta, mitochondrial OS=Zea mays GN=ATPB PE=2 SV=1}	{pxb:103947063; K02133 ATPeF1B, ATP5B, ATP2 F-type H+-transporting ATPase subunit beta 3.6.3.14 ko00190; Metabolism; Energy metabolism; Oxidative phosphorylation | ko05010; Human Diseases; Neurodegenerative diseases; Alzheimer's disease | ko05012; Human Diseases; Neurodegenerative diseases; Parkinson's disease | ko05016; Human Diseases; Neurodegenerative diseases; Huntington's disease}	{Hs4502295; KOG1350 F0F1-type ATP synthase, beta subunit C Energy production and conversion ;}	{GO:0003924; GTPase activity; molecular_function GO:0006754; ATP biosynthetic process; biological_process GO:0016887; ATPase activity; molecular_function GO:0043531; ADP binding; molecular_function GO:0000275; mitochondrial proton-transporting ATP synthase complex, catalytic core F(1); cellular_component GO:0015992; proton transport; biological_process GO:0005525; GTP binding; molecular_function …	{XM_009615190.2; PREDICTED: Nicotiana tomentosiformis ATP synthase subunit beta, mitochondrial-like (LOC104106612), mRNA}	{PF00005:ABC transporter PF02874:ATP synthase alpha/beta family, beta-barrel domain PF00931:NB-ARC domain PF00004:ATPase family associated with various cellular activities (AAA) PF11421:ATP synthase F1 beta subunit PF01637:ATPase domain predominantly from Archaea PF03193:Protein of unknown function, DUF258 PF00006:ATP synthase alpha/beta family, nucleotide-binding domain}	15,28,46a,46b
thalsimine(68)	transcript_HQ_SCJY_transcript23134/f4p0/448	0.887094	0.0447623	{XP_020105357.1; metallothionein-like protein type 3 [Ananas comosus]}	{sp|Q96386|MT3_CARPA; Metallothionein-like protein type 3 OS=Carica papaya PE=3 SV=1}	{rcu:8273569; - - - - -}	{NA}	{GO:0046872; metal ion binding; molecular_function}	{NA}	{PF01439:Metallothionein}	28,46a,46b,68
magnoflorine(15)	transcript_HQ_YNMLP_transcript13015/f2p0/2059	0.976446	0.00432395	{XP_010260596.1; PREDICTED: probable gamma-aminobutyrate transaminase 3, mitochondrial [Nelumbo nucifera]}	{sp|Q84P52|GATP3_SOLLC; Gamma aminobutyrate transaminase 3, chloroplastic OS=Solanum lycopersicum GN=GABA-TP3 PE=1 SV=1}	{nnu:104599670; K16871 POP2 4-aminobutyrate---pyruvate transaminase 2.6.1.96 ko00650; Metabolism; Carbohydrate metabolism; Butanoate metabolism | ko00250; Metabolism; Amino acid metabolism; Alanine, aspartate and glutamate metabolism}	{At3g22200; KOG1404 Alanine-glyoxylate aminotransferase AGT2 E Amino acid transport and metabolism ;}	{GO:0030170; pyridoxal phosphate binding; molecular_function GO:0008483; transaminase activity; molecular_function}	{XM_010262294.2; PREDICTED: Nelumbo nucifera probable gamma-aminobutyrate transaminase 3, mitochondrial (LOC104599670), mRNA}	{PF00202:Aminotransferase class-III}	15,28,46a,46b
magnoflorine(15)	transcript_HQ_SCJY_transcript9092/f2p0/2052	0.940596	0.0172245	{XP_010271915.1; PREDICTED: stomatal closure-related actin-binding protein 1 isoform X1 [Nelumbo nucifera]}	{sp|O48791|SCAB1_ARATH; Stomatal closure-related actin-binding protein 1 OS=Arabidopsis thaliana GN=SCAB1 PE=1 SV=1}	{cit:102622518; - - - - -}	{NA}	{GO:0003779; actin binding; molecular_function}	{XM_010273614.2; PREDICTED: Nelumbo nucifera stomatal closure-related actin-binding protein 1 (LOC104607860), transcript variant X2, mRNA}	{PF16711:Actin-binding domain of plant-specific actin-binding protein}	15,28,46a,46b
magnoflorine(15)	transcript_HQ_YNLB_transcript3740/f2p0/2965	0.921445	0.026116	{KUM46372.1; hypothetical protein ABT39_MTgene1471 (mitochondrion) [Picea glauca]}	{NA}	{NA}	{NA}	{NA}	{KX545367.1; Hesperelaea palmeri voucher E. Palmer 81 (MO) mitochondrion, complete genome}	{NA}	15,28,46a,46b
thalsimine(68)	transcript_HQ_SCJY_transcript11544/f3p0/1779	0.879269	0.0494352	{XP_010087965.1; Citrate synthase [Morus notabilis]}	{sp|P49298|CISY_CITMA; Citrate synthase, mitochondrial OS=Citrus maxima GN=CIT PE=2 SV=1}	{cic:CICLE_v10031423mg; K01647 CS, gltA citrate synthase 2.3.3.1 ko01200; Metabolism; Global and overview maps; Carbon metabolism | ko01210; Metabolism; Global and overview maps; 2-Oxocarboxylic acid metabolism | ko01230; Metabolism; Global and overview maps; Biosynthesis of amino acids | ko00020; Metabolism; Carbohydrate metabolism; Citrate cycle (TCA cycle) | ko00630; Metabolism; Carbohydrate m…	{At2g44350; KOG2617 Citrate synthase C Energy production and conversion ;}	{GO:0018298; protein-chromophore linkage; biological_process GO:0009584; detection of visible light; biological_process GO:0046912; transferase activity, transferring acyl groups, acyl groups converted into alkyl on transfer; molecular_function GO:0006355; regulation of transcription, DNA-dependent; biological_process}	{KM214676.1; Prunus sibirica citrate synthase mRNA, complete cds}	{PF00360:Phytochrome region PF00285:Citrate synthase, C-terminal domain}	28,46a,46b,68
thalsimine(68)	transcript_HQ_SCEZ_transcript13641/f2p0/1704	0.882716	0.0473588	{XP_012467166.1; PREDICTED: glutamate decarboxylase-like [Gossypium raimondii]}	{sp|Q07346|DCE_PETHY; Glutamate decarboxylase OS=Petunia hybrida GN=GAD PE=1 SV=1}	{gra:105785601; K01580 E4.1.1.15, gadB, gadA, GAD glutamate decarboxylase 4.1.1.15 ko00650; Metabolism; Carbohydrate metabolism; Butanoate metabolism | ko00250; Metabolism; Amino acid metabolism; Alanine, aspartate and glutamate metabolism | ko00410; Metabolism; Metabolism of other amino acids; beta-Alanine metabolism | ko00430; Metabolism; Metabolism of other amino acids; Taurine and hypotaurine…	{At5g17330; KOG1383 Glutamate decarboxylase/sphingosine phosphate lyase E Amino acid transport and metabolism ;}	{GO:0019752; carboxylic acid metabolic process; biological_process GO:0016831; carboxy-lyase activity; molecular_function GO:0030170; pyridoxal phosphate binding; molecular_function}	{XM_002528469.2; PREDICTED: Ricinus communis glutamate decarboxylase (LOC8258742), mRNA}	{PF00282:Pyridoxal-dependent decarboxylase conserved domain}	28,46a,46b,68
magnoflorine(15)	transcript_HQ_YNLB_transcript24425/f2p0/465	0.928702	0.0226074	{XP_010242840.1; PREDICTED: expansin-like A1 [Nelumbo nucifera]}	{sp|Q9LZT4|EXLA1_ARATH; Expansin-like A1 OS=Arabidopsis thaliana GN=EXLA1 PE=2 SV=1}	{mdm:103445248; - - - - -}	{NA}	{NA}	{NA}	{NA}	15,28,46a,46b
magnoflorine(15)	transcript_HQ_YNLB_transcript5614/f2p0/2656	0.901245	0.0366971	{XP_010279135.1; PREDICTED: serine/threonine-protein kinase EDR1-like isoform X2 [Nelumbo nucifera]}	{sp|Q05609|CTR1_ARATH; Serine/threonine-protein kinase CTR1 OS=Arabidopsis thaliana GN=CTR1 PE=1 SV=1}	{cit:102629525; - - - - -}	{At3g58640; KOG0192 Tyrosine kinase specific for activated (GTP-bound) p21cdc42Hs T Signal transduction mechanisms ;}	{GO:0016020; membrane; cellular_component GO:0016773; phosphotransferase activity, alcohol group as acceptor; molecular_function GO:0005524; ATP binding; molecular_function GO:0004672; protein kinase activity; molecular_function GO:0006468; protein phosphorylation; biological_process}	{XM_019200437.1; PREDICTED: Nelumbo nucifera serine/threonine-protein kinase EDR1-like (LOC104613129), transcript variant X5, mRNA}	{PF06293:Lipopolysaccharide kinase (Kdo/WaaP) family PF00069:Protein kinase domain PF07714:Protein tyrosine kinase}	15,28,46a,46b
magnoflorine(15)	transcript_HQ_YNLB_transcript10276/f2p0/2119	0.921307	0.0261845	{XP_003081883.1; faceless pollen-1 (ISS) [Ostreococcus tauri]}	{sp|F4HVY0|CER1_ARATH; Protein ECERIFERUM 1 OS=Arabidopsis thaliana GN=CER1 PE=1 SV=1}	{ota:Ot11g00810; - - - - -}	{NA}	{GO:0005506; iron ion binding; molecular_function GO:0009396; folic acid-containing compound biosynthetic process; biological_process GO:0003824; NA GO:0004488; methylenetetrahydrofolate dehydrogenase (NADP+) activity; molecular_function GO:0055114; oxidation-reduction process; biological_process GO:0006633; fatty acid biosynthetic process; biological_process GO:0016491; oxidoreductase activity; …	{NA}	{PF04116:Fatty acid hydroxylase superfamily PF02882:Tetrahydrofolate dehydrogenase/cyclohydrolase, NAD(P)-binding domain}	15,28,46a,46b
magnoflorine(15)	transcript_HQ_SCEZ_transcript22776/f2p0/897	0.951952	0.0125513	{BAF80448.1; corytuberine synthase [Coptis japonica var. dissecta]}	{sp|P47195|C80A1_BERST; Berbamunine synthase OS=Berberis stolonifera GN=CYP80A1 PE=1 SV=1}	{nnu:104595105; K07408 CYP1A1 cytochrome P450 family 1 subfamily A polypeptide 1 1.14.14.1 ko00140; Metabolism; Lipid metabolism; Steroid hormone biosynthesis | ko00380; Metabolism; Amino acid metabolism; Tryptophan metabolism | ko00830; Metabolism; Metabolism of cofactors and vitamins; Retinol metabolism | ko00980; Metabolism; Xenobiotics biodegradation and metabolism; Metabolism of xenobiotics …	{At1g33730; KOG0156 Cytochrome P450 CYP2 subfamily Q Secondary metabolites biosynthesis, transport and catabolism ;}	{GO:0016705; oxidoreductase activity, acting on paired donors, with incorporation or reduction of molecular oxygen; molecular_function GO:0005506; iron ion binding; molecular_function GO:0055114; oxidation-reduction process; biological_process GO:0020037; heme binding; molecular_function}	{AB288053.1; Coptis japonica var. dissecta Cyp80G2 mRNA for corytuberine synthase, complete cds}	{PF00067:Cytochrome P450}	15,28,46a,46b
thalsimine(68)	transcript_HQ_SCJY_transcript12830/f2p0/1626	0.88379	0.0467175	{AKA88914.1; KXL3 [Aquilegia coerulea]}	{sp|P46606|HD1_BRANA; Homeobox protein HD1 OS=Brassica napus GN=HD1 PE=2 SV=1}	{nnu:104596214; - - - - -}	{At1g62990; KOG0773 Transcription factor MEIS1 and related HOX domain proteins K Transcription ;}	{GO:0005634; nucleus; cellular_component GO:0003677; DNA binding; molecular_function GO:0006355; regulation of transcription, DNA-dependent; biological_process}	{KP331535.1; Aquilegia coerulea KXL3 mRNA, complete cds}	{PF05920:Homeobox KN domain PF03791:KNOX2 domain PF03789:ELK domain PF00046:Homeobox domain PF03790:KNOX1 domain }	28,46a,46b,68
thalsimine(68)	transcript_HQ_SCEZ_transcript12545/f5p0/1822	0.882363	0.0475703	{XP_012067443.1; PREDICTED: serine/threonine-protein kinase OSR1 isoform X1 [Jatropha curcas]}	{sp|Q551H4|FRAY2_DICDI; Serine/threonine-protein kinase fray2 OS=Dictyostelium discoideum GN=fray2 PE=3 SV=1}	{jcu:105630271; K08835 OXSR1, STK39 serine/threonine-protein kinase OSR1/STK39 2.7.11.1 -}	{At5g14720; KOG0582 Ste20-like serine/threonine protein kinase T Signal transduction mechanisms ;}	{GO:0005524; ATP binding; molecular_function GO:0004672; protein kinase activity; molecular_function GO:0006468; protein phosphorylation; biological_process}	{XM_015210761.1; PREDICTED: Solanum pennellii serine/threonine-protein kinase BLUS1 (LOC107011318), transcript variant X2, mRNA}	{PF07714:Protein tyrosine kinase PF00069:Protein kinase domain}	28,46a,46b,68
thalsimine(68)	transcript_HQ_SCJY_transcript15015/f2p0/1364	0.885813	0.0455176	{XP_010243735.1; PREDICTED: arogenate dehydratase/prephenate dehydratase 6, chloroplastic-like [Nelumbo nucifera]}	{sp|Q9ZUY3|AROD3_ARATH; Arogenate dehydratase 3, chloroplastic OS=Arabidopsis thaliana GN=ADT3 PE=1 SV=1}	{nnu:104587717; K05359 ADT, PDT arogenate/prephenate dehydratase [EC:4.2.1.91 4.2.1.51] 4.2.1.91,4.2.1.51 ko01230; Metabolism; Global and overview maps; Biosynthesis of amino acids | ko00400; Metabolism; Amino acid metabolism; Phenylalanine, tyrosine and tryptophan biosynthesis}	{At2g27820; KOG2797 Prephenate dehydratase E Amino acid transport and metabolism ;}	{GO:0009094; L-phenylalanine biosynthetic process; biological_process GO:0016597; amino acid binding; molecular_function GO:0004664; prephenate dehydratase activity; molecular_function GO:0008152; NA}	{JX424035.1; Papaver somniferum cultivar Sujata arogenate dehydratase/prephenate dehydratase (ADT) mRNA, complete cds}	{PF01842:ACT domain PF00800:Prephenate dehydratase}	28,46a,46b,68
magnoflorine(15)	transcript_HQ_YNLB_transcript16425/f2p0/1466	0.922373	0.0256586	{XP_010257702.1; PREDICTED: zinc finger A20 and AN1 domain-containing stress-associated protein 6-like [Nelumbo nucifera]}	{sp|Q7Y1W9|SAP9_ORYSJ; Zinc finger A20 and AN1 domain-containing stress-associated protein 9 OS=Oryza sativa subsp. japonica GN=SAP9 PE=2 SV=1}	{nnu:104597695; - - - - -}	{At3g52800; KOG3173 Predicted Zn-finger protein R General function prediction only ;}	{GO:0003677; DNA binding; molecular_function GO:0008270; zinc ion binding; molecular_function}	{XM_007039960.2; PREDICTED: Theobroma cacao zinc finger A20 and AN1 domain-containing stress-associated protein 1 (LOC18606384), mRNA}	{PF01428:AN1-like Zinc finger PF01754:A20-like zinc finger}	15,28,46a,46b
magnoflorine(15)	transcript_HQ_YNLB_transcript1020/f2p0/3953	0.914249	0.0297527	{XP_010250290.1; PREDICTED: protein TOPLESS-like isoform X4 [Nelumbo nucifera]}	{sp|Q94AI7|TPL_ARATH; Protein TOPLESS OS=Arabidopsis thaliana GN=TPL PE=1 SV=1}	{nnu:104592556; - - - - -}	{At1g15750; KOG0266 WD40 repeat-containing protein R General function prediction only ;}	{GO:0005515; protein binding; molecular_function}	{XM_010246592.2; PREDICTED: Nelumbo nucifera topless-related protein 1-like (LOC104588592), transcript variant X7, mRNA}	{PF00400:WD domain, G-beta repeat PF08513:LisH}	15,28,46a,46b
thalsimine(68)	transcript_HQ_SCJY_transcript11607/f2p0/1772	0.880957	0.0484151	{XP_009374616.1; PREDICTED: glutathione reductase, cytosolic [Pyrus x bretschneideri]}	{sp|Q43621|GSHRC_PEA; Glutathione reductase, cytosolic OS=Pisum sativum PE=2 SV=1}	{pmum:103324330; K00383 GSR, gor glutathione reductase (NADPH) 1.8.1.7 ko00480; Metabolism; Metabolism of other amino acids; Glutathione metabolism | ko04918; Organismal Systems; Endocrine system; Thyroid hormone synthesis}	{At3g24170; KOG0405 Pyridine nucleotide-disulphide oxidoreductase Q Secondary metabolites biosynthesis, transport and catabolism ;}	{GO:0055114; oxidation-reduction process; biological_process GO:0045454; cell redox homeostasis; biological_process GO:0051287; NAD binding; molecular_function GO:0050660; flavin adenine dinucleotide binding; molecular_function GO:0016491; oxidoreductase activity; molecular_function GO:0008033; tRNA processing; biological_process}	{XM_007222080.1; Prunus persica hypothetical protein (PRUPE_ppa004673mg) mRNA, complete cds}	{PF00070:Pyridine nucleotide-disulphide oxidoreductase PF02826:D-isomer specific 2-hydroxyacid dehydrogenase, NAD binding domain PF12831:FAD dependent oxidoreductase PF01134:Glucose inhibited division protein A PF07992:Pyridine nucleotide-disulphide oxidoreductase PF02852:Pyridine nucleotide-disulphide oxidoreductase, dimerisation domain}	28,46a,46b,68
magnoflorine(15)	transcript_HQ_YNMLP_transcript590/f2p0/4469	0.904758	0.0347753	{XP_002277713.1; PREDICTED: probable cellulose synthase A catalytic subunit 5 [UDP-forming] [Vitis vinifera]}	{sp|A2XNT2|CESA5_ORYSI; Probable cellulose synthase A catalytic subunit 5 [UDP-forming] OS=Oryza sativa subsp. indica GN=CESA5 PE=3 SV=1}	{atr:18439664; K10999 CESA cellulose synthase A 2.4.1.12 -}	{NA}	{GO:0016760; cellulose synthase (UDP-forming) activity; molecular_function GO:0016020; membrane; cellular_component GO:0030244; cellulose biosynthetic process; biological_process}	{XM_002277677.3; PREDICTED: Vitis vinifera probable cellulose synthase A catalytic subunit 5 [UDP-forming] (LOC100242715), mRNA}	{PF03552:Cellulose synthase}	15,28,46a,46b
magnoflorine(15)	transcript_HQ_SCJY_transcript18324/f2p0/931	0.915445	0.029138	{XP_010661873.1; PREDICTED: exosome complex component RRP41 homolog [Vitis vinifera]}	{sp|Q9SP08|RRP41_ARATH; Exosome complex component RRP41 homolog OS=Arabidopsis thaliana GN=RRP41 PE=1 SV=1}	{cam:101500832; K11600 RRP41, EXOSC4, SKI6 exosome complex component RRP41 - ko03018; Genetic Information Processing; Folding, sorting and degradation; RNA degradation}	{At3g61620; KOG1068 Exosomal 3'-5' exoribonuclease complex, subunit Rrp41 and related exoribonucleases J Translation, ribosomal structure and biogenesis ;}	{NA}	{XM_010243997.2; PREDICTED: Nelumbo nucifera exosome complex component RRP41 homolog (LOC104586690), transcript variant X2, mRNA}	{NA}	15,28,46a,46b
cheilanthifoline(28)	transcript_HQ_SCJY_transcript1396/f2p0/3216	0.888852	0.0437332	{XP_010255037.1; PREDICTED: extra-large guanine nucleotide-binding protein 1-like [Nelumbo nucifera]}	{sp|O80462|XLG1_ARATH; Extra-large guanine nucleotide-binding protein 1 OS=Arabidopsis thaliana GN=XLG1 PE=1 SV=2}	{nnu:104595827; - - - - -}	{At2g23460; KOG0082 G-protein alpha subunit (small G protein superfamily) DT Cell cycle control, cell division, chromosome partitioning ; Signal transduction mechanisms ;}	{GO:0004871; signal transducer activity; molecular_function GO:0031683; G-protein beta/gamma-subunit complex binding; molecular_function GO:0019001; guanyl nucleotide binding; molecular_function GO:0003924; GTPase activity; molecular_function GO:0007186; G-protein coupled receptor protein signaling pathway; biological_process}	{XR_002030487.1; PREDICTED: Vitis vinifera extra-large guanine nucleotide-binding protein 1 (LOC100248291), transcript variant X3, misc_RNA}	{PF00503:G-protein alpha subunit}	28,46a,46b,55
magnoflorine(15)	transcript_HQ_SCEZ_transcript1796/f2p0/3258	0.891926	0.0419517	{AGK82785.1; lipoxygenase [Malus domestica]}	{sp|P38418|LOX2_ARATH; Lipoxygenase 2, chloroplastic OS=Arabidopsis thaliana GN=LOX2 PE=1 SV=1}	{pxb:103945829; K00454 LOX2S lipoxygenase 1.13.11.12 ko00591; Metabolism; Lipid metabolism; Linoleic acid metabolism | ko00592; Metabolism; Lipid metabolism; alpha-Linolenic acid metabolism}	{NA}	{GO:0016702; oxidoreductase activity, acting on single donors with incorporation of molecular oxygen, incorporation of two atoms of oxygen; molecular_function GO:0055114; oxidation-reduction process; biological_process GO:0046872; metal ion binding; molecular_function GO:0005515; protein binding; molecular_function}	{XM_009356413.2; PREDICTED: Pyrus x bretschneideri linoleate 13S-lipoxygenase 2-1, chloroplastic-like (LOC103945829), mRNA}	{PF00305:Lipoxygenase PF01477:PLAT/LH2 domain}	15,28,46a,46b
magnoflorine(15)	transcript_HQ_SCJY_transcript1903/f2p0/3033	0.948129	0.0140706	{XP_004306503.1; PREDICTED: linoleate 13S-lipoxygenase 2-1, chloroplastic-like [Fragaria vesca subsp. vesca]}	{sp|Q84YK8|LOXC2_ORYSJ; Probable lipoxygenase 8, chloroplastic OS=Oryza sativa subsp. japonica GN=CM-LOX2 PE=2 SV=1}	{pxb:103945829; K00454 LOX2S lipoxygenase 1.13.11.12 ko00591; Metabolism; Lipid metabolism; Linoleic acid metabolism | ko00592; Metabolism; Lipid metabolism; alpha-Linolenic acid metabolism}	{NA}	{GO:0016702; oxidoreductase activity, acting on single donors with incorporation of molecular oxygen, incorporation of two atoms of oxygen; molecular_function GO:0046872; metal ion binding; molecular_function GO:0055114; oxidation-reduction process; biological_process}	{XM_003537900.3; PREDICTED: Glycine max linoleate 13S-lipoxygenase 2-1, chloroplastic-like (LOC100786646), mRNA}	{PF00305:Lipoxygenase}	15,28,46a,46b
magnoflorine(15)	transcript_HQ_YNLB_transcript4344/f5p0/2838	0.887992	0.0442355	{XP_010265004.1; PREDICTED: serine/threonine protein phosphatase 2A regulatory subunit B''beta-like [Nelumbo nucifera]}	{sp|Q5QIT3|2AB2B_ARATH; Serine/threonine protein phosphatase 2A regulatory subunit B''beta OS=Arabidopsis thaliana GN=B''BETA PE=1 SV=1}	{sind:105161279; K11583 PPP2R3 serine/threonine-protein phosphatase 2A regulatory subunit B'' - ko03015; Genetic Information Processing; Translation; mRNA surveillance pathway | ko04071; Environmental Information Processing; Signal transduction; Sphingolipid signaling pathway | ko04151; Environmental Information Processing; Signal transduction; PI3K-Akt signaling pathway | ko04152; Environmental …	{At5g28850; KOG2562 Protein phosphatase 2 regulatory subunit A RNA processing and modification ;}	{GO:0005509; calcium ion binding; molecular_function GO:0005578; proteinaceous extracellular matrix; cellular_component GO:0007165; signal transduction; biological_process}	{XM_010264066.2; PREDICTED: Nelumbo nucifera serine/threonine protein phosphatase 2A regulatory subunit B''beta-like (LOC104600907), mRNA}	{PF13833:EF-hand domain pair PF13499:EF-hand domain pair PF00036:EF hand PF10591:Secreted protein acidic and rich in cysteine Ca binding region PF13405:EF-hand domain PF13202:EF hand}	15,28,46a,46b
magnoflorine(15)	transcript_HQ_SCJY_transcript8983/f2p0/2036	0.9131	0.0303471	{XP_010268064.1; PREDICTED: calmodulin-binding protein 60 D-like isoform X2 [Nelumbo nucifera]}	{sp|Q9FKL6|CB60B_ARATH; Calmodulin-binding protein 60 B OS=Arabidopsis thaliana GN=CBP60B PE=2 SV=1}	{nnu:104598845; - - - - -}	{NA}	{GO:0005516; calmodulin binding; molecular_function GO:0006950; response to stress; biological_process}	{NA}	{PF07887:Calmodulin binding protein-like}	15,28,46a,46b
magnoflorine(15)	transcript_HQ_SCJY_transcript10906/f2p0/1835	0.882088	0.0477347	{XP_007042481.2; PREDICTED: scopoletin glucosyltransferase [Theobroma cacao]}	{sp|Q9AT54|SCGT_TOBAC; Scopoletin glucosyltransferase OS=Nicotiana tabacum GN=TOGT1 PE=1 SV=1}	{cic:CICLE_v10028305mg; - - - - -}	{At4g34131; KOG1192 UDP-glucuronosyl and UDP-glucosyl transferase GC Carbohydrate transport and metabolism ; Energy production and conversion ;}	{GO:0016758; transferase activity, transferring hexosyl groups; molecular_function GO:0008152; NA}	{XM_012610023.1; PREDICTED: Gossypium raimondii scopoletin glucosyltransferase-like (LOC105784216), mRNA}	{PF00201:UDP-glucoronosyl and UDP-glucosyl transferase}	15,28,46a,46b
magnoflorine(15)	transcript_HQ_SCJY_transcript22179/f2p0/553	0.895172	0.0400962	{XP_006376403.1; GTP-binding family protein [Populus trichocarpa]}	{sp|Q40521|RB11B_TOBAC; Ras-related protein Rab11B OS=Nicotiana tabacum GN=RAB11B PE=2 SV=1}	{rcu:8270266; K07904 RAB11A Ras-related protein Rab-11A - ko04144; Cellular Processes; Transport and catabolism; Endocytosis | ko04972; Organismal Systems; Digestive system; Pancreatic secretion | ko04962; Organismal Systems; Excretory system; Vasopressin-regulated water reabsorption | ko04961; Organismal Systems; Excretory system; Endocrine and other factor-regulated calcium reabsorption}	{At5g60860; KOG0087 GTPase Rab11/YPT3, small G protein superfamily U Intracellular trafficking, secretion, and vesicular transport ;}	{GO:0005525; GTP binding; molecular_function GO:0007264; small GTPase mediated signal transduction; biological_process}	{XM_009591797.2; PREDICTED: Nicotiana tomentosiformis ras-related protein RABA1f-like (LOC104087362), mRNA}	{PF00071:Ras family}	15,28,46a,46b
magnoflorine(15)	transcript_HQ_SCJY_transcript5175/f3p0/2478	0.924779	0.0244837	{XP_015898533.1; PREDICTED: UDP-glycosyltransferase 73D1-like [Ziziphus jujuba]}	{sp|Q9SCP6|U73D1_ARATH; UDP-glycosyltransferase 73D1 OS=Arabidopsis thaliana GN=UGT73D1 PE=3 SV=1}	{pper:PRUPE_ppa019633mg; - - - - -}	{At3g53150; KOG1192 UDP-glucuronosyl and UDP-glucosyl transferase GC Carbohydrate transport and metabolism ; Energy production and conversion ;}	{GO:0008152; NA GO:0016758; transferase activity, transferring hexosyl groups; molecular_function}	{XM_007162747.1; Phaseolus vulgaris hypothetical protein (PHAVU_001G182600g) mRNA, complete cds}	{PF00201:UDP-glucoronosyl and UDP-glucosyl transferase}	15,28,46a,46b
thalsimine(68)	transcript_HQ_SCEZ_transcript9538/f3p0/2039	0.882127	0.0477117	{XP_002524947.1; PREDICTED: probable indole-3-acetic acid-amido synthetase GH3.1 [Ricinus communis]}	{sp|O22190|GH33_ARATH; Indole-3-acetic acid-amido synthetase GH3.3 OS=Arabidopsis thaliana GN=GH3.3 PE=1 SV=1}	{rcu:8285613; K14487 GH3 auxin responsive GH3 gene family - ko04075; Environmental Information Processing; Signal transduction; Plant hormone signal transduction}	{NA}	{NA}	{XM_009761827.1; PREDICTED: Nicotiana sylvestris probable indole-3-acetic acid-amido synthetase GH3.1 (LOC104212532), mRNA}	{NA}	28,46a,46b,68
magnoflorine(15)	transcript_HQ_YNMLP_transcript13751/f2p0/1966	0.918513	0.0275795	{XP_010262660.1; PREDICTED: aldehyde oxidase GLOX [Nelumbo nucifera]}	{sp|Q3HRQ2|GLOX_VITPS; Aldehyde oxidase GLOX OS=Vitis pseudoreticulata GN=GLOX PE=2 SV=1}	{pper:PRUPE_ppa003992mg; K20929 GLX glyoxal/methylglyoxal oxidase 1.2.3.15 -}	{NA}	{NA}	{XM_011008328.1; PREDICTED: Populus euphratica galactose oxidase (LOC105112592), mRNA}	{NA}	15,28,46a,46b
thalsimine(68)	transcript_HQ_SCEZ_transcript22726/f3p0/913	0.883265	0.0470309	{AIU50560.1; accelerated cell death 11, partial [Aquilegia coerulea]}	{sp|O64587|ACD11_ARATH; Accelerated cell death 11 OS=Arabidopsis thaliana GN=ACD11 PE=1 SV=1}	{jcu:105636863; - - - - -}	{At2g34690; KOG4189 Uncharacterized conserved protein S Function unknown ;}	{GO:0051861; glycolipid binding; molecular_function GO:0005737; cytoplasm; cellular_component GO:0017089; glycolipid transporter activity; molecular_function GO:0046836; glycolipid transport; biological_process}	{KM399927.1; Aquilegia coerulea accelerated cell death 11 mRNA, partial cds}	{PF08718:Glycolipid transfer protein (GLTP)}	28,46a,46b,68
magnoflorine(15)	transcript_HQ_SCJY_transcript2830/f2p0/2964	0.891041	0.0424619	{XP_010263903.1; PREDICTED: arginine decarboxylase-like [Nelumbo nucifera]}	{sp|Q43075|SPE1_PEA; Arginine decarboxylase OS=Pisum sativum PE=2 SV=1}	{pper:PRUPE_ppa002034mg; K01583 E4.1.1.19 arginine decarboxylase 4.1.1.19 ko00330; Metabolism; Amino acid metabolism; Arginine and proline metabolism}	{NA}	{GO:0003824; NA}	{XM_019557276.1; PREDICTED: Lupinus angustifolius arginine decarboxylase-like (LOC109325124), mRNA}	{PF00278:Pyridoxal-dependent decarboxylase, C-terminal sheet domain PF02784:Pyridoxal-dependent decarboxylase, pyridoxal binding domain}	15,28,46a,46b
thalsimine(68)	transcript_HQ_SCJY_transcript607/f2p0/3686	0.881952	0.0478166	{XP_010275603.1; PREDICTED: probable starch synthase 4, chloroplastic/amyloplastic [Nelumbo nucifera]}	{sp|Q0WVX5|SSY4_ARATH; Probable starch synthase 4, chloroplastic/amyloplastic OS=Arabidopsis thaliana GN=SS4 PE=2 SV=1}	{nnu:104610595; - - - - -}	{NA}	{GO:0015991; ATP hydrolysis coupled proton transport; biological_process GO:0008289; lipid binding; molecular_function GO:0015078; hydrogen ion transmembrane transporter activity; molecular_function GO:0033179; proton-transporting V-type ATPase, V0 domain; cellular_component}	{XM_019199967.1; PREDICTED: Nelumbo nucifera probable starch synthase 4, chloroplastic/amyloplastic (LOC104610595), transcript variant X2, mRNA}	{PF05823:Nematode fatty acid retinoid binding protein (Gp-FAR-1) PF01496:V-type ATPase 116kDa subunit family }	28,46a,46b,68
thalsimine(68)	transcript_HQ_SCJY_transcript1139/f2p0/3370	0.882174	0.0476831	{XP_010248883.1; PREDICTED: transcription factor GTE10-like [Nelumbo nucifera]}	{sp|Q9FGW9|GTE10_ARATH; Transcription factor GTE10 OS=Arabidopsis thaliana GN=GTE10 PE=1 SV=2}	{nnu:104591647; - - - - -}	{At5g63330; KOG1474 Transcription initiation factor TFIID, subunit BDF1 and related bromodomain proteins K Transcription ;}	{GO:0005515; protein binding; molecular_function}	{XM_009373420.2; PREDICTED: Pyrus x bretschneideri transcription factor GTE8-like (LOC103960922), transcript variant X3, mRNA}	{PF00439:Bromodomain}	28,46a,46b,68
magnoflorine(15)	transcript_HQ_YNLB_transcript14292/f2p0/1721	0.918439	0.0276167	{XP_007034709.1; PREDICTED: sugar transport protein 13 [Theobroma cacao]}	{sp|Q94AZ2|STP13_ARATH; Sugar transport protein 13 OS=Arabidopsis thaliana GN=STP13 PE=1 SV=2}	{var:108319888; - - - - -}	{At5g26340; KOG0254 Predicted transporter (major facilitator superfamily) R General function prediction only ;}	{GO:0022857; transmembrane transporter activity; molecular_function GO:0016021; integral to membrane; cellular_component GO:0055085; transmembrane transport; biological_process}	{XM_002314673.2; Populus trichocarpa hypothetical protein (POPTR_0010s10010g) mRNA, complete cds}	{PF00083:Sugar (and other) transporter PF07690:Major Facilitator Superfamily}	15,28,46a,46b
thalsimine(68)	transcript_HQ_SCJY_transcript21222/f3p0/664	0.887425	0.0445681	{XP_002307493.1; ubiquinol-cytochrome C reductase complex 7.8 kDa family protein [Populus trichocarpa]}	{sp|P48504|QCR6_SOLTU; Cytochrome b-c1 complex subunit 6 OS=Solanum tuberosum PE=1 SV=2}	{pmum:103319112; K00416 QCR6, UQCRH ubiquinol-cytochrome c reductase subunit 6 - ko00190; Metabolism; Energy metabolism; Oxidative phosphorylation | ko04260; Organismal Systems; Circulatory system; Cardiac muscle contraction | ko05010; Human Diseases; Neurodegenerative diseases; Alzheimer's disease | ko05012; Human Diseases; Neurodegenerative diseases; Parkinson's disease | ko05016; Human Disease…	{At1g15120; KOG4763 Ubiquinol-cytochrome c reductase hinge protein C Energy production and conversion ;}	{GO:0005739; mitochondrion; cellular_component GO:0004129; cytochrome-c oxidase activity; molecular_function}	{XM_008220612.2; PREDICTED: Prunus mume cytochrome b-c1 complex subunit 6 (LOC103319112), transcript variant X2, mRNA}	{PF02297:Cytochrome oxidase c subunit VIb}	28,46a,46b,68
magnoflorine(15)	transcript_HQ_YNLB_transcript17952/f2p0/1214	0.888541	0.0439148	{JAT41371.1; Glutamine synthetase nodule isozyme, partial [Anthurium amnicola]}	{sp|Q43785|GLNA3_MEDSA; Glutamine synthetase nodule isozyme OS=Medicago sativa GN=GS1 PE=2 SV=1}	{atr:18433902; K01915 glnA, GLUL glutamine synthetase 6.3.1.2 ko01230; Metabolism; Global and overview maps; Biosynthesis of amino acids | ko00630; Metabolism; Carbohydrate metabolism; Glyoxylate and dicarboxylate metabolism | ko00910; Metabolism; Energy metabolism; Nitrogen metabolism | ko00250; Metabolism; Amino acid metabolism; Alanine, aspartate and glutamate metabolism | ko00220; Metabolism;…	{At1g66200; KOG0683 Glutamine synthetase E Amino acid transport and metabolism ;}	{GO:0006807; nitrogen compound metabolic process; biological_process GO:0004356; glutamate-ammonia ligase activity; molecular_function GO:0006542; glutamine biosynthetic process; biological_process}	{XM_002306349.2; Populus trichocarpa glutamine synthetase family protein (POPTR_0005s09610g) mRNA, complete cds}	{PF00120:Glutamine synthetase, catalytic domain PF03951:Glutamine synthetase, beta-Grasp domain}	15,28,46a,46b
magnoflorine(15)	transcript_HQ_SCJY_transcript3796/f2p0/2646	0.878724	0.0497659	{XP_010254310.1; PREDICTED: probable 1-deoxy-D-xylulose-5-phosphate synthase, chloroplastic isoform X2 [Nelumbo nucifera]}	{sp|O78328|DXS_CAPAN; Probable 1-deoxy-D-xylulose-5-phosphate synthase, chloroplastic OS=Capsicum annuum GN=TKT2 PE=2 SV=1}	{nnu:104595318; K01662 dxs 1-deoxy-D-xylulose-5-phosphate synthase 2.2.1.7 ko00730; Metabolism; Metabolism of cofactors and vitamins; Thiamine metabolism | ko00900; Metabolism; Metabolism of terpenoids and polyketides; Terpenoid backbone biosynthesis}	{At5g11380; KOG0523 Transketolase G Carbohydrate transport and metabolism ;}	{GO:0008661; 1-deoxy-D-xylulose-5-phosphate synthase activity; molecular_function GO:0016114; terpenoid biosynthetic process; biological_process}	{XM_016030432.1; PREDICTED: Ziziphus jujuba probable 1-deoxy-D-xylulose-5-phosphate synthase, chloroplastic (LOC107421238), transcript variant X2, mRNA}	{PF13292:1-deoxy-D-xylulose-5-phosphate synthase}	15,28,46a,46b
magnoflorine(15)	transcript_HQ_SCJY_transcript9322/f5p0/2001	0.900243	0.0372515	{XP_010250761.1; PREDICTED: F-box/kelch-repeat protein At1g67480 [Nelumbo nucifera]}	{sp|Q9CAG8|FBK28_ARATH; F-box/kelch-repeat protein At1g67480 OS=Arabidopsis thaliana GN=At1g67480 PE=2 SV=1}	{nnu:104592913; - - - - -}	{At1g67480; KOG1072 FOG: Kelch repeat R General function prediction only ;}	{GO:0005515; protein binding; molecular_function}	{NA}	{PF01344:Kelch motif PF00646:F-box domain PF07646:Kelch motif}	15,28,46a,46b
magnoflorine(15)	transcript_HQ_SCJY_transcript19430/f2p0/823	0.917308	0.0281884	{XP_015900073.1; PREDICTED: 1,4-dihydroxy-2-naphthoyl-CoA thioesterase 1 isoform X2 [Ziziphus jujuba]}	{sp|Q9SX65|DNAT1_ARATH; 1,4-dihydroxy-2-naphthoyl-CoA thioesterase 1 OS=Arabidopsis thaliana GN=DHNAT1 PE=1 SV=1}	{var:108319480; - - - - -}	{At1g48320; KOG3328 HGG motif-containing thioesterase R General function prediction only ;}	{NA}	{XM_016107263.1; PREDICTED: Arachis duranensis 1,4-dihydroxy-2-naphthoyl-CoA thioesterase 1-like (LOC107486702), mRNA}	{NA}	15,28,46a,46b
magnoflorine(15)	transcript_HQ_YNLB_transcript6772/f2p0/2501	0.941383	0.0168854	{XP_019075428.1; PREDICTED: paramyosin isoform X2 [Vitis vinifera]}	{NA}	{vvi:100266362; - - - - -}	{NA}	{GO:0007165; signal transduction; biological_process GO:0005102; receptor binding; molecular_function GO:0016020; membrane; cellular_component GO:0030674; protein binding, bridging; molecular_function GO:0005577; fibrinogen complex; cellular_component GO:0061617; NA GO:0051258; protein polymerization; biological_process GO:0009405; pathogenesis; biological_process GO:0042407; cristae formation; b…	{XM_010250395.2; PREDICTED: Nelumbo nucifera myosin-4-like (LOC104591532), transcript variant X2, mRNA}	{PF05791:Bacillus haemolytic enterotoxin (HBL) PF09769:Apolipoprotein O PF10186:Vacuolar sorting 38 and autophagy-related subunit 14 PF08702:Fibrinogen alpha/beta chain family}	15,28,46a,46b
magnoflorine(15)	transcript_HQ_SCJY_transcript18129/f2p0/950	0.9173	0.0281921	{XP_011089321.1; PREDICTED: probable ubiquitin-conjugating enzyme E2 C [Sesamum indicum]}	{sp|Q8L7T3|UBC20_ARATH; Ubiquitin-conjugating enzyme E2 20 OS=Arabidopsis thaliana GN=UBC20 PE=2 SV=1}	{vvi:100253010; K06688 UBE2C, UBC11 ubiquitin-conjugating enzyme E2 C 2.3.2.23 ko04120; Genetic Information Processing; Folding, sorting and degradation; Ubiquitin mediated proteolysis}	{At3g20060; KOG0421 Ubiquitin-protein ligase O Posttranslational modification, protein turnover, chaperones ;}	{GO:0006464; protein modification process; biological_process GO:0015031; protein transport; biological_process GO:0005515; protein binding; molecular_function}	{XM_016021678.1; PREDICTED: Ziziphus jujuba probable ubiquitin-conjugating enzyme E2 C (LOC107413667), mRNA}	{PF05773:RWD domain PF05743:UEV domain}	15,28,46a,46b
magnoflorine(15)	transcript_HQ_YNLB_transcript833/f2p0/4100	-0.892211	0.0417876	{XP_010245658.1; PREDICTED: probable leucine-rich repeat receptor-like protein kinase At2g33170 [Nelumbo nucifera]}	{sp|Q9LVP0|Y5639_ARATH; Probable leucine-rich repeat receptor-like protein kinase At5g63930 OS=Arabidopsis thaliana GN=At5g63930 PE=2 SV=1}	{pmum:103323762; - - - - -}	{NA}	{GO:0005515; protein binding; molecular_function GO:0004672; protein kinase activity; molecular_function GO:0005524; ATP binding; molecular_function GO:0006468; protein phosphorylation; biological_process}	{XM_019198572.1; PREDICTED: Nelumbo nucifera probable leucine-rich repeat receptor-like protein kinase At5g63930 (LOC104602134), mRNA}	{PF00560:Leucine Rich Repeat PF13855:Leucine rich repeat PF00069:Protein kinase domain PF07714:Protein tyrosine kinase}	15,28,46a,46b
magnoflorine(15)	transcript_HQ_YNLB_transcript1096/f2p0/3925	0.879915	0.0490439	{XP_010243374.1; PREDICTED: AP-2 complex subunit alpha-1-like [Nelumbo nucifera]}	{sp|Q8LPL6|AP2A1_ARATH; AP-2 complex subunit alpha-1 OS=Arabidopsis thaliana GN=ALPHA-ADR PE=1 SV=1}	{nnu:104587454; K11824 AP2A AP-2 complex subunit alpha - ko04144; Cellular Processes; Transport and catabolism; Endocytosis | ko04961; Organismal Systems; Excretory system; Endocrine and other factor-regulated calcium reabsorption | ko04721; Organismal Systems; Nervous system; Synaptic vesicle cycle | ko05016; Human Diseases; Neurodegenerative diseases; Huntington's disease}	{At5g22770; KOG1077 Vesicle coat complex AP-2, alpha subunit U Intracellular trafficking, secretion, and vesicular transport ;}	{GO:0030117; membrane coat; cellular_component GO:0030131; clathrin adaptor complex; cellular_component GO:0005515; protein binding; molecular_function GO:0006886; intracellular protein transport; biological_process GO:0016192; vesicle-mediated transport; biological_process}	{XM_010245072.2; PREDICTED: Nelumbo nucifera AP-2 complex subunit alpha-1-like (LOC104587454), mRNA}	{PF02985:HEAT repeat PF02296:Alpha adaptin AP2, C-terminal domain PF02883:Adaptin C-terminal domain PF01602:Adaptin N terminal region}	15,28,46a,46b
magnoflorine(15)	transcript_HQ_YNLB_transcript15345/f2p0/1585	0.890728	0.0426427	{XP_010241953.1; PREDICTED: monothiol glutaredoxin-S17 [Nelumbo nucifera]}	{sp|Q9ZPH2|GRS17_ARATH; Monothiol glutaredoxin-S17 OS=Arabidopsis thaliana GN=GRXS17 PE=1 SV=1}	{cit:102630192; - - - - -}	{At4g04950; KOG0911 Glutaredoxin-related protein O Posttranslational modification, protein turnover, chaperones ;}	{GO:0009055; NA GO:0000398; nuclear mRNA splicing, via spliceosome; biological_process GO:0005681; spliceosomal complex; cellular_component GO:0005515; protein binding; molecular_function GO:0015035; protein disulfide oxidoreductase activity; molecular_function GO:0045454; cell redox homeostasis; biological_process}	{XM_010243651.2; PREDICTED: Nelumbo nucifera monothiol glutaredoxin-S17 (LOC104586421), mRNA}	{PF13417:Glutathione S-transferase, N-terminal domain PF00462:Glutaredoxin PF02966:Mitosis protein DIM1 PF00085:Thioredoxin}	15,28,46a,46b
magnoflorine(15)	transcript_HQ_YNLB_transcript6356/f3p0/2542	0.928617	0.0226476	{XP_010266712.1; PREDICTED: something about silencing protein 10 [Nelumbo nucifera]}	{sp|Q9I7W5|SAS10_DROME; Something about silencing protein 10 OS=Drosophila melanogaster GN=Sas10 PE=1 SV=2}	{pmum:103322372; K14767 UTP3, SAS10 U3 small nucleolar RNA-associated protein 3 - -}	{At2g43650; KOG3118 Disrupter of silencing SAS10 B Chromatin structure and dynamics ;}	{GO:0042729; DASH complex; cellular_component GO:0008608; attachment of spindle microtubules to kinetochore; biological_process GO:0072686; mitotic spindle; cellular_component}	{NA}	{PF08656:DASH complex subunit Dad3}	15,28,46a,46b
magnoflorine(15)	transcript_HQ_SCJY_transcript14340/f2p0/1436	0.904498	0.0349168	{XP_010253440.1; PREDICTED: probable protein phosphatase 2C 38 [Nelumbo nucifera]}	{sp|Q9LHJ9|P2C38_ARATH; Probable protein phosphatase 2C 38 OS=Arabidopsis thaliana GN=PP2C38 PE=1 SV=1}	{nnu:104594709; K01102 PDP pyruvate dehydrogenase phosphatase 3.1.3.43 -}	{At3g12620; KOG0700 Protein phosphatase 2C/pyruvate dehydrogenase (lipoamide) phosphatase T Signal transduction mechanisms ;}	{GO:0003824; NA GO:0008080; N-acetyltransferase activity; molecular_function}	{XM_007218061.1; Prunus persica hypothetical protein (PRUPE_ppa007029mg) mRNA, complete cds}	{PF00583:Acetyltransferase (GNAT) family PF00481:Protein phosphatase 2C PF07228:Stage II sporulation protein E (SpoIIE)}	15,28,46a,46b
magnoflorine(15)	transcript_HQ_SCJY_transcript7012/f2p0/2236	0.9195	0.0270838	{XP_010248018.1; PREDICTED: protein NRT1/ PTR FAMILY 4.5-like isoform X1 [Nelumbo nucifera]}	{sp|Q93VV5|PTR16_ARATH; Protein NRT1/ PTR FAMILY 4.3 OS=Arabidopsis thaliana GN=NPF4.3 PE=2 SV=1}	{cam:101504253; K14638 SLC15A3_4, PHT solute carrier family 15 (peptide/histidine transporter), member 3/4 - -}	{At1g59740; KOG1237 H+/oligopeptide symporter E Amino acid transport and metabolism ;}	{GO:0016020; membrane; cellular_component GO:0006810; transport; biological_process GO:0005215; NA}	{NA}	{PF00854:POT family}	15,28,46a,46b
thalsimine(68)	transcript_HQ_SCJY_transcript11450/f2p0/1798	0.878442	0.0499376	{XP_010274012.1; PREDICTED: ankyrin repeat and SAM domain-containing protein 6-like [Nelumbo nucifera]}	{NA}	{lang:109351855; - - - - -; lang:109351855; - - - - -}	{At5g48680; KOG4374 RNA-binding protein Bicaudal-C A RNA processing and modification ;}	{GO:0005515; protein binding; molecular_function}	{NA}	{PF07647:SAM domain (Sterile alpha motif) PF00536:SAM domain (Sterile alpha motif) PF07646:Kelch motif PF01344:Kelch motif}	28,46a,46b,68
thalsimine(68)	transcript_HQ_SCEZ_transcript6853/f5p0/2297	0.879211	0.0494704	{XP_010258593.1; PREDICTED: probable E3 ubiquitin-protein ligase ARI8 [Nelumbo nucifera]}	{sp|Q8W468|ARI8_ARATH; Probable E3 ubiquitin-protein ligase ARI8 OS=Arabidopsis thaliana GN=ARI8 PE=2 SV=1}	{nnu:104598293; K11968 ARIH1 ariadne-1 2.3.2.27 -}	{At1g65430; KOG1815 Predicted E3 ubiquitin ligase O Posttranslational modification, protein turnover, chaperones ;}	{GO:0046872; metal ion binding; molecular_function GO:0008270; zinc ion binding; molecular_function GO:0005515; protein binding; molecular_function}	{NA}	{PF14634:zinc-RING finger domain PF00097:Zinc finger, C3HC4 type (RING finger) PF13639:Ring finger domain}	28,46a,46b,68
thalsimine(68)	transcript_HQ_SCJY_transcript5535/f3p0/2409	0.882373	0.0475643	{OAY36580.1; hypothetical protein MANES_11G031700 [Manihot esculenta]}	{sp|Q94AA4|PFKA3_ARATH; ATP-dependent 6-phosphofructokinase 3 OS=Arabidopsis thaliana GN=PFK3 PE=1 SV=1}	{vvi:100243946; K00850 pfkA, PFK 6-phosphofructokinase 1 2.7.1.11 ko01200; Metabolism; Global and overview maps; Carbon metabolism | ko01230; Metabolism; Global and overview maps; Biosynthesis of amino acids | ko00010; Metabolism; Carbohydrate metabolism; Glycolysis / Gluconeogenesis | ko00030; Metabolism; Carbohydrate metabolism; Pentose phosphate pathway | ko00051; Metabolism; Carbohydrate meta…	{At5g56630; KOG2440 Pyrophosphate-dependent phosphofructo-1-kinase G Carbohydrate transport and metabolism ;}	{GO:0003872; 6-phosphofructokinase activity; molecular_function GO:0006096; glycolysis; biological_process GO:0016301; kinase activity; molecular_function}	{XM_010246101.2; PREDICTED: Nelumbo nucifera ATP-dependent 6-phosphofructokinase 3-like (LOC104588249), mRNA}	{PF00365:Phosphofructokinase PF00781:Diacylglycerol kinase catalytic domain}	28,46a,46b,68
thalsimine(68)	transcript_HQ_SCJY_transcript20110/f6p0/752	0.886571	0.0450701	{ALG05138.1; polyphenol oxidase [Sinopodophyllum hexandrum]}	{sp|P43311|PPO_VITVI; Polyphenol oxidase, chloroplastic OS=Vitis vinifera PE=1 SV=1}	{egu:105045129; K00422 E1.10.3.1 polyphenol oxidase 1.10.3.1 ko00350; Metabolism; Amino acid metabolism; Tyrosine metabolism | ko00950; Metabolism; Biosynthesis of other secondary metabolites; Isoquinoline alkaloid biosynthesis}	{NA}	{GO:0055114; oxidation-reduction process; biological_process GO:0004097; catechol oxidase activity; molecular_function}	{NA}	{PF12143:Protein of unknown function (DUF_B2219)}	28,46a,46b,68
thalsimine(68)	transcript_HQ_SCEZ_transcript25751/f2p0/564	0.885732	0.0455653	{XP_016207777.1; PREDICTED: calcium-binding protein CML39 [Arachis ipaensis]}	{sp|Q9FIH9|CML37_ARATH; Calcium-binding protein CML37 OS=Arabidopsis thaliana GN=CML37 PE=2 SV=1}	{lang:109358122; K13448 CML calcium-binding protein CML - ko04626; Organismal Systems; Environmental adaptation; Plant-pathogen interaction; lang:109358122; - - - - -}	{At5g42380; KOG0027 Calmodulin and related proteins (EF-Hand superfamily) T Signal transduction mechanisms ;}	{GO:0005515; protein binding; molecular_function GO:0005509; calcium ion binding; molecular_function GO:0007165; signal transduction; biological_process GO:0009507; chloroplast; cellular_component GO:0005578; proteinaceous extracellular matrix; cellular_component}	{NA}	{PF13499:EF-hand domain pair PF13833:EF-hand domain pair PF10591:Secreted protein acidic and rich in cysteine Ca binding region PF00036:EF hand PF13202:EF hand PF12763:Cytoskeletal-regulatory complex EF hand PF16940:Chloroplast envelope transporter PF13405:EF-hand domain}	28,46a,46b,68
magnoflorine(15)	transcript_HQ_YNLB_transcript19095/f2p0/1096	0.903665	0.0353697	{XP_007017298.2; PREDICTED: probable carboxylesterase 2 [Theobroma cacao]}	{sp|Q9SX78|CXE2_ARATH; Probable carboxylesterase 2 OS=Arabidopsis thaliana GN=CXE2 PE=2 SV=1}	{lang:109357863; - - - - -; lang:109357863; - - - - -}	{At1g47480; KOG1515 Arylacetamide deacetylase V Defense mechanisms ;}	{GO:0008152; NA GO:0016787; hydrolase activity; molecular_function}	{NA}	{PF07859:alpha/beta hydrolase fold}	15,28,46a,46b
thalsimine(68)	transcript_HQ_SCJY_transcript7108/f5p0/2277	0.886831	0.0449171	{XP_010245369.1; PREDICTED: protein TRANSPORT INHIBITOR RESPONSE 1-like [Nelumbo nucifera]}	{sp|Q570C0|TIR1_ARATH; Protein TRANSPORT INHIBITOR RESPONSE 1 OS=Arabidopsis thaliana GN=TIR1 PE=1 SV=2}	{nnu:104585903; K14485 TIR1 transport inhibitor response 1 - ko04075; Environmental Information Processing; Signal transduction; Plant hormone signal transduction}	{At3g62980; KOG1947 Leucine rich repeat proteins, some proteins contain F-box R General function prediction only ;}	{GO:0005515; protein binding; molecular_function}	{XM_010247067.2; PREDICTED: Nelumbo nucifera protein TRANSPORT INHIBITOR RESPONSE 1-like (LOC104588936), mRNA}	{PF00646:F-box domain PF13516:Leucine Rich repeat PF12937:F-box-like}	28,46a,46b,68
thalsimine(68)	transcript_HQ_SCJY_transcript20105/f2p0/767	0.8832	0.0470694	{JAT47567.1; Calmodulin-like protein 5, partial [Anthurium amnicola]}	{NA}	{pper:PRUPE_ppa016540mg; - - - - -}	{NA}	{GO:0005509; calcium ion binding; molecular_function}	{NA}	{PF13202:EF hand PF13833:EF-hand domain pair PF13405:EF-hand domain PF13499:EF-hand domain pair PF00036:EF hand}	28,46a,46b,68
magnoflorine(15)	transcript_HQ_YNMLP_transcript13576/f2p0/1973	0.949238	0.0136242	{XP_010266724.1; PREDICTED: cation/calcium exchanger 1-like [Nelumbo nucifera]}	{sp|Q9FKP1|CCX1_ARATH; Cation/calcium exchanger 1 OS=Arabidopsis thaliana GN=CCX1 PE=2 SV=1}	{pper:PRUPE_ppa003284mg; K13754 SLC24A6, NCKX6 solute carrier family 24 (sodium/potassium/calcium exchanger), member 6 - -}	{At5g17860; KOG2399 K+-dependent Na+:Ca2+ antiporter P Inorganic ion transport and metabolism ;}	{GO:0016021; integral to membrane; cellular_component GO:0055085; transmembrane transport; biological_process}	{XM_018977869.1; PREDICTED: Juglans regia cation/calcium exchanger 1 (LOC109000857), mRNA}	{PF01699:Sodium/calcium exchanger protein}	15,28,46a,46b
thalsimine(68)	transcript_HQ_SCJY_transcript11010/f2p0/1856	0.879653	0.0492025	{XP_002266808.1; PREDICTED: (-)-alpha-terpineol synthase [Vitis vinifera]}	{sp|B3TPQ7|ATESY_MAGGA; Alpha-terpineol synthase, chloroplastic OS=Magnolia grandiflora PE=1 SV=1}	{vvi:100261705; - - - - -}	{NA}	{GO:0000287; magnesium ion binding; molecular_function GO:0008152; NA GO:0010333; terpene synthase activity; molecular_function GO:0016829; lyase activity; molecular_function}	{NA}	{PF01397:Terpene synthase, N-terminal domain PF03936:Terpene synthase family, metal binding domain}	28,46a,46b,68
magnoflorine(15)	transcript_HQ_YNLB_transcript15137/f2p0/1617	0.911459	0.031203	{XP_010274079.1; PREDICTED: UV-B-induced protein At3g17800, chloroplastic-like [Nelumbo nucifera]}	{sp|Q9LVJ0|UVB31_ARATH; UV-B-induced protein At3g17800, chloroplastic OS=Arabidopsis thaliana GN=At3g17800 PE=2 SV=1}	{vvi:100251038; - - - - -}	{NA}	{NA}	{NA}	{NA}	15,28,46a,46b
magnoflorine(15)	transcript_HQ_SCJY_transcript17519/f7p0/1044	0.901845	0.0363666	{XP_011083732.1; PREDICTED: NEDD8-conjugating enzyme Ubc12 [Sesamum indicum]}	{sp|Q9SDY5|RCE1_ARATH; NEDD8-conjugating enzyme Ubc12 OS=Arabidopsis thaliana GN=RCE1 PE=1 SV=1}	{pper:PRUPE_ppa012086mg; K10579 UBE2M, UBC12 ubiquitin-conjugating enzyme E2 M - ko04120; Genetic Information Processing; Folding, sorting and degradation; Ubiquitin mediated proteolysis}	{At2g18600; KOG0420 Ubiquitin-protein ligase O Posttranslational modification, protein turnover, chaperones ;}	{GO:0005515; protein binding; molecular_function}	{XM_003631580.3; PREDICTED: Vitis vinifera NEDD8-conjugating enzyme Ubc12 (LOC100255479), transcript variant X1, mRNA}	{PF05773:RWD domain}	15,28,46a,46b
thalsimine(68)	transcript_HQ_SCJY_transcript8838/f2p0/2083	0.882518	0.0474773	{XP_010243162.1; PREDICTED: glycosyltransferase family protein 64 protein C5-like isoform X2 [Nelumbo nucifera]}	{sp|Q84WB7|GT645_ARATH; Glycosyltransferase family protein 64 protein C5 OS=Arabidopsis thaliana GN=At5g04500 PE=2 SV=1}	{nnu:104587301; - - - - -}	{At5g04500; KOG1022 Acetylglucosaminyltransferase EXT2/exostosin 2 GMW Carbohydrate transport and metabolism ; Cell wall/membrane/envelope biogenesis ; Extracellular structures ;}	{GO:0015012; heparan sulfate proteoglycan biosynthetic process; biological_process GO:0004553; hydrolase activity, hydrolyzing O-glycosyl compounds; molecular_function GO:0005975; carbohydrate metabolic process; biological_process GO:0006024; glycosaminoglycan biosynthetic process; biological_process GO:0016021; integral to membrane; cellular_component}	{XM_010244860.2; PREDICTED: Nelumbo nucifera glycosyltransferase family protein 64 protein C5-like (LOC104587301), transcript variant X2, mRNA}	{PF09258:Glycosyl transferase family 64 domain PF04616:Glycosyl hydrolases family 43}	28,46a,46b,68
magnoflorine(15)	transcript_HQ_SCEZ_transcript5510/f2p0/2463	0.926821	0.0235011	{XP_010275969.1; PREDICTED: leucine-rich repeat receptor-like protein CLAVATA2 [Nelumbo nucifera]}	{sp|O80809|CLV2_ARATH; Leucine-rich repeat receptor-like protein CLAVATA2 OS=Arabidopsis thaliana GN=CLV2 PE=1 SV=1}	{pmum:103318778; - - - - -}	{At1g65380; KOG0619 FOG: Leucine rich repeat R General function prediction only ;}	{GO:0005515; protein binding; molecular_function}	{NA}	{PF13516:Leucine Rich repeat PF00560:Leucine Rich Repeat PF13855:Leucine rich repeat}	15,28,46a,46b
magnoflorine(15)	transcript_HQ_SCJY_transcript11236/f6p0/1799	0.915418	0.0291518	{XP_010244747.1; PREDICTED: probable protein phosphatase 2C 27 isoform X1 [Nelumbo nucifera]}	{sp|Q69QZ0|P2C27_ORYSJ; Probable protein phosphatase 2C 27 OS=Oryza sativa subsp. japonica GN=Os02g0799000 PE=2 SV=1}	{rcu:8275709; K14803 PTC2_3 protein phosphatase PTC2/3 3.1.3.16 -}	{At2g25620; KOG0698 Serine/threonine protein phosphatase T Signal transduction mechanisms ;}	{GO:0003824; NA}	{XM_010929963.1; PREDICTED: Elaeis guineensis probable protein phosphatase 2C 27 (LOC105050094), mRNA}	{PF00481:Protein phosphatase 2C PF07228:Stage II sporulation protein E (SpoIIE)}	15,28,46a,46b
magnoflorine(15)	transcript_HQ_SCJY_transcript17755/f2p0/1009	0.900769	0.0369598	{XP_010258954.1; PREDICTED: luc7-like protein 3 isoform X2 [Nelumbo nucifera]}	{sp|Q5SUF2|LC7L3_MOUSE; Luc7-like protein 3 OS=Mus musculus GN=Luc7l3 PE=1 SV=1}	{nnu:104598532; - - - - -}	{At5g51410; KOG0796 Spliceosome subunit A RNA processing and modification ;}	{GO:0006376; mRNA splice site selection; biological_process GO:0006270; DNA-dependent DNA replication initiation; biological_process GO:0005685; U1 snRNP; cellular_component GO:0003729; mRNA binding; molecular_function}	{XM_019595327.1; PREDICTED: Lupinus angustifolius luc7-like protein 3 (LOC109353142), transcript variant X2, mRNA}	{PF02724:CDC45-like protein PF03194:LUC7 N_terminus}	15,28,46a,46b
thalsimine(68)	transcript_HQ_SCJY_transcript17863/f5p0/979	0.88234	0.0475838	{XP_010259661.1; PREDICTED: glutathione S-transferase F13 [Nelumbo nucifera]}	{sp|Q9LZI9|GSTFD_ARATH; Glutathione S-transferase F13 OS=Arabidopsis thaliana GN=GSTF13 PE=3 SV=1}	{nnu:104599002; K00799 GST, gst glutathione S-transferase 2.5.1.18 ko00480; Metabolism; Metabolism of other amino acids; Glutathione metabolism | ko00980; Metabolism; Xenobiotics biodegradation and metabolism; Metabolism of xenobiotics by cytochrome P450 | ko00982; Metabolism; Xenobiotics biodegradation and metabolism; Drug metabolism - cytochrome P450 | ko05204; Human Diseases; Cancers: Overview…	{At3g62760; KOG0867 Glutathione S-transferase O Posttranslational modification, protein turnover, chaperones ;}	{GO:0005515; protein binding; molecular_function}	{XM_017774234.1; PREDICTED: Gossypium arboreum glutathione S-transferase F13 (LOC108472684), mRNA}	{PF13417:Glutathione S-transferase, N-terminal domain PF02798:Glutathione S-transferase, N-terminal domain PF13409:Glutathione S-transferase, N-terminal domain}	28,46a,46b,68
thalsimine(68)	transcript_HQ_SCJY_transcript1587/f3p0/3151	0.88181	0.0479015	{XP_018856913.1; PREDICTED: putative inactive cadmium/zinc-transporting ATPase HMA3 isoform X3 [Juglans regia]}	{sp|Q9SZW4|HMA2_ARATH; Cadmium/zinc-transporting ATPase HMA2 OS=Arabidopsis thaliana GN=HMA2 PE=2 SV=1}	{vvi:100243678; K01534 zntA Cd2+/Zn2+-exporting ATPase [EC:3.6.3.3 3.6.3.5] 3.6.3.3,3.6.3.5 -}	{At4g30110; KOG0207 Cation transport ATPase P Inorganic ion transport and metabolism ;}	{GO:0000166; nucleotide binding; molecular_function GO:0046872; metal ion binding; molecular_function}	{XM_010278876.2; PREDICTED: Nelumbo nucifera putative inactive cadmium/zinc-transporting ATPase HMA3 (LOC104611703), mRNA}	{PF00122:E1-E2 ATPase}	28,46a,46b,68
magnoflorine(15)	transcript_HQ_YNLB_transcript23367/f3p0/581	0.888726	0.0438064	{XP_010259237.1; PREDICTED: transcription factor bHLH147 [Nelumbo nucifera]}	{sp|O80482|BH149_ARATH; Transcription factor bHLH149 OS=Arabidopsis thaliana GN=BHLH149 PE=1 SV=1}	{nnu:104598747; - - - - -}	{NA}	{GO:0006412; translation; biological_process GO:0005622; intracellular; cellular_component GO:0005840; ribosome; cellular_component GO:0003735; structural constituent of ribosome; molecular_function}	{NA}	{PF00318:Ribosomal protein S2}	15,28,46a,46b
thalsimine(68)	transcript_HQ_SCJY_transcript3553/f2p0/2701	0.881899	0.0478482	{XP_010273456.1; PREDICTED: inositol polyphosphate multikinase beta-like [Nelumbo nucifera]}	{sp|Q9FLT2|IPMKB_ARATH; Inositol polyphosphate multikinase beta OS=Arabidopsis thaliana GN=IPK2b PE=1 SV=1}	{mdm:103454867; K00915 IPMK, IPK2 inositol-polyphosphate multikinase [EC:2.7.1.140 2.7.1.151] 2.7.1.140,2.7.1.151 ko00562; Metabolism; Carbohydrate metabolism; Inositol phosphate metabolism | ko04070; Environmental Information Processing; Signal transduction; Phosphatidylinositol signaling system | ko04138; Cellular Processes; Transport and catabolism; Autophagy - yeast}	{At5g61760; KOG1620 Inositol polyphosphate multikinase, component of the ARGR transcription regulatory complex KIT Transcription ; Lipid transport and metabolism ; Signal transduction mechanisms ;}	{GO:0008440; inositol trisphosphate 3-kinase activity; molecular_function}	{NA}	{PF03770:Inositol polyphosphate kinase }	28,46a,46b,68
magnoflorine(15)	transcript_HQ_YNLB_transcript3881/f2p0/2911	0.915252	0.0292367	{BAS99152.1; Os06g0681400, partial [Oryza sativa Japonica Group]}	{sp|Q8H159|UBQ10_ARATH; Polyubiquitin 10 OS=Arabidopsis thaliana GN=UBQ10 PE=2 SV=2}	{jcu:105629279; K08770 UBC ubiquitin C - ko03320; Organismal Systems; Endocrine system; PPAR signaling pathway}	{CE01921; KOG0001 Ubiquitin and ubiquitin-like proteins OR Posttranslational modification, protein turnover, chaperones ; General function prediction only ;}	{GO:0008168; methyltransferase activity; molecular_function GO:0006364; rRNA processing; biological_process GO:0005515; protein binding; molecular_function}	{XM_010695939.2; PREDICTED: Beta vulgaris subsp. vulgaris polyubiquitin (LOC104907074), mRNA}	{PF00240:Ubiquitin family PF04452:RNA methyltransferase PF14560:Ubiquitin-like domain}	15,28,46a,46b
magnoflorine(15)	transcript_HQ_SCJY_transcript22048/f3p0/523	0.907024	0.0335538	{XP_010269470.1; PREDICTED: glutathione S-transferase F13-like [Nelumbo nucifera]}	{sp|O65857|GSTF1_ORYSJ; Probable glutathione S-transferase GSTF1 OS=Oryza sativa subsp. japonica GN=GSTF1 PE=1 SV=2}	{nnu:104599002; K00799 GST, gst glutathione S-transferase 2.5.1.18 ko00480; Metabolism; Metabolism of other amino acids; Glutathione metabolism | ko00980; Metabolism; Xenobiotics biodegradation and metabolism; Metabolism of xenobiotics by cytochrome P450 | ko00982; Metabolism; Xenobiotics biodegradation and metabolism; Drug metabolism - cytochrome P450 | ko05204; Human Diseases; Cancers: Overview…	{At3g62760; KOG0867 Glutathione S-transferase O Posttranslational modification, protein turnover, chaperones ;}	{NA}	{NA}	{NA}	15,28,46a,46b
thalsimine(68)	transcript_HQ_SCEZ_transcript9656/f2p0/2032	0.878662	0.0498038	{XP_002276114.1; PREDICTED: leucine aminopeptidase 1 isoform X1 [Vitis vinifera]}	{sp|Q944P7|AMPL2_ARATH; Leucine aminopeptidase 2, chloroplastic OS=Arabidopsis thaliana GN=LAP2 PE=2 SV=2}	{vvi:100250183; K01255 CARP, pepA leucyl aminopeptidase 3.4.11.1 ko00480; Metabolism; Metabolism of other amino acids; Glutathione metabolism}	{At4g30920; KOG2597 Predicted aminopeptidase of the M17 family R General function prediction only ;}	{GO:0006508; proteolysis; biological_process GO:0005622; intracellular; cellular_component GO:0004177; aminopeptidase activity; molecular_function}	{XM_010277521.2; PREDICTED: Nelumbo nucifera leucine aminopeptidase 1-like (LOC104610748), mRNA}	{PF00883:Cytosol aminopeptidase family, catalytic domain PF02789:Cytosol aminopeptidase family, N-terminal domain}	28,46a,46b,68
magnoflorine(15)	transcript_HQ_SCJY_transcript268/f2p0/4081	0.882416	0.0475385	{XP_011004857.1; PREDICTED: probable leucine-rich repeat receptor-like protein kinase At1g35710 [Populus euphratica]}	{sp|Q8L9A0|RM21_ARATH; 50S ribosomal protein L21, mitochondrial OS=Arabidopsis thaliana GN=RPL21M PE=2 SV=1}	{rcu:8277151; - - - - -}	{At1g33590; KOG0619 FOG: Leucine rich repeat R General function prediction only ;}	{GO:0005515; protein binding; molecular_function}	{NA}	{PF13855:Leucine rich repeat}	15,28,46a,46b
thalsimine(68)	transcript_HQ_SCJY_transcript23122/f2p0/456	0.880432	0.0487317	{XP_010278065.1; PREDICTED: protein SUPPRESSOR OF MAX2 1-like [Nelumbo nucifera]}	{sp|Q9FHH2|SMAX1_ARATH; Protein SUPPRESSOR OF MAX2 1 OS=Arabidopsis thaliana GN=SMAX1 PE=1 SV=1}	{sot:102585124; - - - - -}	{At5g57710; KOG1051 Chaperone HSP104 and related ATP-dependent Clp proteases O Posttranslational modification, protein turnover, chaperones ;}	{NA}	{NA}	{NA}	28,46a,46b,68
thalsimine(68)	transcript_HQ_SCJY_transcript18925/f4p0/875	0.881172	0.0482855	{XP_010270643.1; PREDICTED: calcium-binding protein CML38-like [Nelumbo nucifera]}	{sp|Q9FIH9|CML37_ARATH; Calcium-binding protein CML37 OS=Arabidopsis thaliana GN=CML37 PE=2 SV=1}	{jcu:105635140; K13448 CML calcium-binding protein CML - ko04626; Organismal Systems; Environmental adaptation; Plant-pathogen interaction}	{At5g42380; KOG0027 Calmodulin and related proteins (EF-Hand superfamily) T Signal transduction mechanisms ;}	{GO:0005578; proteinaceous extracellular matrix; cellular_component GO:0007165; signal transduction; biological_process GO:0005509; calcium ion binding; molecular_function GO:0005515; protein binding; molecular_function}	{NA}	{PF00036:EF hand PF13405:EF-hand domain PF10591:Secreted protein acidic and rich in cysteine Ca binding region PF13499:EF-hand domain pair PF13202:EF hand PF12763:Cytoskeletal-regulatory complex EF hand PF13833:EF-hand domain pair}	28,46a,46b,68
magnoflorine(15)	transcript_HQ_SCJY_transcript15446/f3p0/1288	0.949186	0.0136448	{XP_010274745.1; PREDICTED: aldose 1-epimerase-like [Nelumbo nucifera]}	{sp|Q66HG4|GALM_RAT; Aldose 1-epimerase OS=Rattus norvegicus GN=Galm PE=1 SV=1}	{egr:104423484; K01785 galM, GALM aldose 1-epimerase 5.1.3.3 ko00010; Metabolism; Carbohydrate metabolism; Glycolysis / Gluconeogenesis | ko00052; Metabolism; Carbohydrate metabolism; Galactose metabolism}	{At3g17940; KOG1604 Predicted mutarotase G Carbohydrate transport and metabolism ;}	{GO:0016853; isomerase activity; molecular_function GO:0005975; carbohydrate metabolic process; biological_process}	{XM_010276443.2; PREDICTED: Nelumbo nucifera aldose 1-epimerase-like (LOC104609989), mRNA}	{PF01263:Aldose 1-epimerase}	15,28,46a,46b
magnoflorine(15)	transcript_HQ_SCJY_transcript13457/f3p0/1556	0.975119	0.00469364	{XP_010273069.1; PREDICTED: putative glycosyltransferase 7 [Nelumbo nucifera]}	{sp|Q564G7|GMGT1_CYATE; Galactomannan galactosyltransferase 1 OS=Cyamopsis tetragonoloba GN=GMGT1 PE=1 SV=1}	{nnu:104608709; - - - - -}	{At5g07720; KOG4748 Subunit of Golgi mannosyltransferase complex GM Carbohydrate transport and metabolism ; Cell wall/membrane/envelope biogenesis ;}	{GO:0016021; integral to membrane; cellular_component GO:0016757; transferase activity, transferring glycosyl groups; molecular_function}	{XM_012232035.1; PREDICTED: Jatropha curcas galactomannan galactosyltransferase 1-like (LOC105646219), mRNA}	{PF05637:galactosyl transferase GMA12/MNN10 family}	15,28,46a,46b
thalsimine(68)	transcript_HQ_SCEZ_transcript22612/f2p0/912	0.879499	0.0492959	{XP_010259029.1; PREDICTED: auxin-responsive protein SAUR36 [Nelumbo nucifera]}	{sp|O22150|SAU36_ARATH; Auxin-responsive protein SAUR36 OS=Arabidopsis thaliana GN=SAUR36 PE=2 SV=1}	{nnu:104598585; K14488 SAUR SAUR family protein - ko04075; Environmental Information Processing; Signal transduction; Plant hormone signal transduction}	{NA}	{GO:0009733; response to auxin stimulus; biological_process}	{NA}	{PF02519:Auxin responsive protein}	28,46a,46b,68
magnoflorine(15)	transcript_HQ_SCJY_transcript19130/f2p0/867	0.956169	0.0109429	{XP_016436734.1; PREDICTED: endo-1,3;1,4-beta-D-glucanase-like [Nicotiana tabacum]}	{sp|Q9ZT66|E134_MAIZE; Endo-1,3;1,4-beta-D-glucanase OS=Zea mays PE=1 SV=1}	{nnu:104601063; - - - - -}	{At3g23600; KOG3043 Predicted hydrolase related to dienelactone hydrolase R General function prediction only ;}	{GO:0016787; hydrolase activity; molecular_function}	{XM_012981198.1; PREDICTED: Erythranthe guttatus endo-1,3;1,4-beta-D-glucanase-like (LOC105957263), mRNA}	{PF01738:Dienelactone hydrolase family}	15,28,46a,46b
thalsimine(68)	transcript_HQ_SCEZ_transcript14001/f2p0/1724	0.879377	0.0493699	{XP_018853394.1; PREDICTED: rab9 effector protein with kelch motifs isoform X1 [Juglans regia]}	{sp|A8JAM0|DRC7_CHLRE; Dynein regulatory complex subunit 7 (Fragment) OS=Chlamydomonas reinhardtii GN=DRC7 PE=1 SV=1}	{vvi:100248877; - - - - -}	{At2g36360; KOG0379 Kelch repeat-containing proteins R General function prediction only ;}	{GO:0005515; protein binding; molecular_function GO:0006310; DNA recombination; biological_process GO:0003677; DNA binding; molecular_function GO:0005634; nucleus; cellular_component}	{XM_010245572.2; PREDICTED: Nelumbo nucifera tip elongation aberrant protein 1 (LOC104587831), transcript variant X1, mRNA}	{PF07646:Kelch motif PF03089:Recombination activating protein 2 PF01344:Kelch motif}	28,46a,46b,68
luteolin-7-O-gentiobioside(24)	transcript_HQ_HBZL_transcript9229/f3p0/2122	0.894737	0.0403431	{XP_010242911.1; PREDICTED: RNA polymerase II degradation factor 1 [Nelumbo nucifera]}	{NA}	{vvi:100264321; - - - - -}	{NA}	{GO:0016740; transferase activity; molecular_function GO:0004674; protein serine/threonine kinase activity; molecular_function GO:0009058; biosynthetic process; biological_process}	{XM_015527661.1; PREDICTED: Citrus sinensis trithorax group protein osa (LOC102607210), mRNA}	{PF00494:Squalene/phytoene synthase PF08587:Ubiquitin associated domain (UBA) }	22,24,45,51,56	C
quercetin-3-rutinoside(17a)	transcript_HQ_SCEZ_transcript17362/f2p0/1446	0.894427	0.0405193	{XP_018834541.1; PREDICTED: 7-deoxyloganetin glucosyltransferase-like isoform X1 [Juglans regia]}	{sp|F8WKW1|UGT2_GARJA; 7-deoxyloganetin glucosyltransferase OS=Gardenia jasminoides GN=UGT85A24 PE=1 SV=1}	{vvi:100853145; K21374 - - 2.4.1.324 -}	{At1g22370; KOG1192 UDP-glucuronosyl and UDP-glucosyl transferase GC Carbohydrate transport and metabolism ; Energy production and conversion ;}	{GO:0005975; carbohydrate metabolic process; biological_process GO:0016758; transferase activity, transferring hexosyl groups; molecular_function GO:0030259; lipid glycosylation; biological_process}	{XM_010089319.1; Morus notabilis UDP-glycosyltransferase 85A1 partial mRNA}	{PF03033:Glycosyltransferase family 28 N-terminal domain}	17a,17b,22,51,56
luteolin-7-O-gentiobioside(24)	transcript_HQ_HBZL_transcript16524/f3p0/1568	0.894737	0.0403431	{XP_015961637.1; PREDICTED: UDP-galactose/UDP-glucose transporter 2-like [Arachis duranensis]}	{sp|Q9LDX3|UTR4_ARATH; UDP-galactose/UDP-glucose transporter 4 OS=Arabidopsis thaliana GN=UTR4 PE=2 SV=1}	{sind:105157384; K15277 SLC35B3, PAPST2 solute carrier family 35 (adenosine 3'-phospho 5'-phosphosulfate transporter), member B3 - -}	{At1g12600; KOG1582 UDP-galactose transporter related protein G Carbohydrate transport and metabolism ;}	{GO:0016020; membrane; cellular_component GO:0016021; integral to membrane; cellular_component GO:0055085; transmembrane transport; biological_process}	{XM_008234647.2; PREDICTED: Prunus mume UDP-galactose/UDP-glucose transporter 2-like (LOC103331964), mRNA}	{PF08449:UAA transporter family PF00892:EamA-like transporter family}	22,24,45,51,56
quercetin-3-rutinoside(17a)	transcript_LQ_HBZL_transcript24453/f2p0/803	-0.894427	0.0405193	{XP_010916150.1; PREDICTED: microsomal glutathione S-transferase 3 [Elaeis guineensis]}	{sp|Q9CPU4|MGST3_MOUSE; Microsomal glutathione S-transferase 3 OS=Mus musculus GN=Mgst3 PE=1 SV=1}	{egu:105041057; K00799 GST, gst glutathione S-transferase 2.5.1.18 ko00480; Metabolism; Metabolism of other amino acids; Glutathione metabolism | ko00980; Metabolism; Xenobiotics biodegradation and metabolism; Metabolism of xenobiotics by cytochrome P450 | ko00982; Metabolism; Xenobiotics biodegradation and metabolism; Drug metabolism - cytochrome P450 | ko05204; Human Diseases; Cancers: Overview…	{NA}	{GO:0019069; viral capsid assembly; biological_process GO:0005524; ATP binding; molecular_function}	{XM_010245615.1; PREDICTED: Nelumbo nucifera microsomal glutathione S-transferase 3-like (LOC104587859), mRNA}	{PF06056:Putative ATPase subunit of terminase (gpP-like)}	17a,17b,22,51,56
luteolin-7-O-gentiobioside(24)	transcript_HQ_HBZL_transcript21536/f2p0/1091	0.894737	0.0403431	{ADF87393.1; class II chitinase [Arachis hypogaea]}	{sp|Q5NB11|CHI10_ORYSJ; Chitinase 10 OS=Oryza sativa subsp. japonica GN=Cht10 PE=2 SV=1}	{gmx:100785397; - - - - -}	{At4g01700; KOG4742 Predicted chitinase R General function prediction only ;}	{GO:0016998; cell wall macromolecule catabolic process; biological_process GO:0004568; chitinase activity; molecular_function GO:0006032; chitin catabolic process; biological_process}	{XM_017378895.1; PREDICTED: Daucus carota subsp. sativus chitinase 10 (LOC108208365), mRNA}	{PF00182:Chitinase class I}	22,24,45,51,56
luteolin-7-O-gentiobioside(24)	transcript_HQ_HBZL_transcript24383/f3p0/766	0.894737	0.0403431	{XP_010260390.1; PREDICTED: pathogenesis-related genes transcriptional activator PTI5-like [Nelumbo nucifera]}	{sp|O04681|PTI5_SOLLC; Pathogenesis-related genes transcriptional activator PTI5 OS=Solanum lycopersicum GN=PTI5 PE=2 SV=1}	{nnu:104599515; - - - - -}	{NA}	{GO:0003700; sequence-specific DNA binding transcription factor activity; molecular_function GO:0006355; regulation of transcription, DNA-dependent; biological_process}	{XM_017562170.1; PREDICTED: Vigna angularis ethylene-responsive transcription factor ERF113-like (LOC108328315), mRNA}	{PF00847:AP2 domain}	22,24,45,51,56
luteolin-7-O-gentiobioside(24)	transcript_HQ_HBZL_transcript1868/f7p0/3289	0.894737	0.0403431	{XP_010242394.1; PREDICTED: ABC transporter A family member 7-like [Nelumbo nucifera]}	{sp|Q9STT5|AB7A_ARATH; ABC transporter A family member 7 OS=Arabidopsis thaliana GN=ABCA7 PE=3 SV=2}	{sot:102584368; - - - - -}	{At3g47780; KOG0059 Lipid exporter ABCA1 and related proteins, ABC superfamily IR Lipid transport and metabolism ; General function prediction only ;}	{GO:0005524; ATP binding; molecular_function GO:0016887; ATPase activity; molecular_function}	{XM_010244092.2; PREDICTED: Nelumbo nucifera ABC transporter A family member 7-like (LOC104586759), mRNA}	{PF00005:ABC transporter}	22,24,45,51,56
luteolin-7-O-gentiobioside(24)	transcript_HQ_HBZL_transcript23833/f7p0/839	0.894737	0.0403431	{XP_010245385.1; PREDICTED: CASP-like protein 1E2 [Nelumbo nucifera]}	{sp|C6TBD0|CSPL6_SOYBN; CASP-like protein 1E1 OS=Glycine max PE=2 SV=1}	{spen:107013169; - - - - -; spen:107013169; - - - - -}	{NA}	{GO:0019955; cytokine binding; molecular_function}	{NA}	{PF12109:CXCR4 Chemokine receptor N terminal}	22,24,45,51,56
luteolin-7-O-gentiobioside(24)	transcript_HQ_HBZL_transcript8821/f3p0/2138	0.894737	0.0403431	{XP_008240500.1; PREDICTED: beta-glucosidase BoGH3B-like isoform X1 [Prunus mume]}	{sp|A7LXU3|BGH3B_BACO1; Beta-glucosidase BoGH3B OS=Bacteroides ovatus (strain ATCC 8483 / DSM 1896 / JCM 5824 / NCTC 11153) GN=BACOVA_02659 PE=1 SV=1}	{cic:CICLE_v10028018mg; K05349 bglX beta-glucosidase 3.2.1.21 ko00500; Metabolism; Carbohydrate metabolism; Starch and sucrose metabolism | ko00460; Metabolism; Metabolism of other amino acids; Cyanoamino acid metabolism | ko00940; Metabolism; Biosynthesis of other secondary metabolites; Phenylpropanoid biosynthesis}	{NA}	{GO:0004553; hydrolase activity, hydrolyzing O-glycosyl compounds; molecular_function GO:0005975; carbohydrate metabolic process; biological_process}	{XM_018974311.1; PREDICTED: Juglans regia beta-glucosidase BoGH3B-like (LOC108997931), transcript variant X2, mRNA}	{PF01915:Glycosyl hydrolase family 3 C-terminal domain PF00933:Glycosyl hydrolase family 3 N terminal domain}	22,24,45,51,56
luteolin-7-O-gentiobioside(24)	transcript_HQ_HBZL_transcript19249/f9p0/1350	0.894737	0.0403431	{XP_016648085.1; PREDICTED: 1-aminocyclopropane-1-carboxylate oxidase homolog 1-like [Prunus mume]}	{sp|Q84MB3|ACCH1_ARATH; 1-aminocyclopropane-1-carboxylate oxidase homolog 1 OS=Arabidopsis thaliana GN=At1g06620 PE=2 SV=1}	{nta:107773731; - - - - -}	{At1g04350; KOG0143 Iron/ascorbate family oxidoreductases QR Secondary metabolites biosynthesis, transport and catabolism ; General function prediction only ;}	{GO:0016491; oxidoreductase activity; molecular_function GO:0055114; oxidation-reduction process; biological_process}	{XM_011040224.1; PREDICTED: Populus euphratica 1-aminocyclopropane-1-carboxylate oxidase homolog 1-like (LOC105135372), mRNA}	{PF03171:2OG-Fe(II) oxygenase superfamily}	22,24,45,51,56
quercetin-3-rutinoside(17a)	transcript_HQ_HBZL_transcript11003/f2p0/1992	-0.894427	0.0405193	{XP_015894908.1; PREDICTED: UDP-galactose/UDP-glucose transporter 3 [Ziziphus jujuba]}	{sp|Q9M9S6|UTR3_ARATH; UDP-galactose/UDP-glucose transporter 3 OS=Arabidopsis thaliana GN=UTR3 PE=1 SV=1}	{nnu:104597096; K15275 SLC35B1 solute carrier family 35 (UDP-galactose transporter), member B1 - -}	{At1g14360; KOG1581 UDP-galactose transporter related protein G Carbohydrate transport and metabolism ;}	{GO:0016021; integral to membrane; cellular_component GO:0055085; transmembrane transport; biological_process GO:0004190; aspartic-type endopeptidase activity; molecular_function GO:0016020; membrane; cellular_component GO:0030436; asexual sporulation; biological_process GO:0006508; proteolysis; biological_process}	{XM_019576504.1; PREDICTED: Lupinus angustifolius UDP-galactose/UDP-glucose transporter 3-like (LOC109339114), mRNA}	{PF03419:Sporulation factor SpoIIGA PF08449:UAA transporter family PF00892:EamA-like transporter family}	17a,17b,22,51,56
luteolin-7-O-gentiobioside(24)	transcript_HQ_HBZL_transcript23304/f3p0/895	0.894737	0.0403431	{XP_007026589.1; PREDICTED: abscisic acid receptor PYL4 [Theobroma cacao]}	{sp|O80920|PYL4_ARATH; Abscisic acid receptor PYL4 OS=Arabidopsis thaliana GN=PYL4 PE=1 SV=1}	{nnu:104597274; K14496 PYL abscisic acid receptor PYR/PYL family - ko04016; Environmental Information Processing; Signal transduction; MAPK signaling pathway - plant | ko04075; Environmental Information Processing; Signal transduction; Plant hormone signal transduction}	{NA}	{GO:0003924; GTPase activity; molecular_function GO:0006952; defense response; biological_process GO:0009607; response to biotic stimulus; biological_process}	{NA}	{PF00407:Pathogenesis-related protein Bet v I family PF00091:Tubulin/FtsZ family, GTPase domain}	22,24,45,51,56
quercetin-3-rutinoside(17a)	transcript_HQ_HBZL_transcript2345/f2p0/3130	-0.894427	0.0405193	{XP_010267316.1; PREDICTED: zinc finger CCCH domain-containing protein 13-like isoform X2 [Nelumbo nucifera]}	{sp|Q24746|NEUR_DROVI; Protein neuralized OS=Drosophila virilis GN=neur PE=4 SV=1}	{jcu:105648580; - - - - -}	{NA}	{GO:0005515; protein binding; molecular_function GO:0003723; RNA binding; molecular_function GO:0008270; zinc ion binding; molecular_function}	{XM_010243352.2; PREDICTED: Nelumbo nucifera uncharacterized LOC104586194 (LOC104586194), mRNA}	{PF13639:Ring finger domain PF03854:P-11 zinc finger}	17a,17b,22,51,56
quercetin-3-rutinoside(17a)	transcript_HQ_HBZL_transcript16543/f4p0/1570	-0.894427	0.0405193	{XP_002324694.2; alpha-hydroxynitrile lyase family protein [Populus trichocarpa]}	{sp|A1L4Y2|ADHL3_ARATH; Alcohol dehydrogenase-like 3 OS=Arabidopsis thaliana GN=At1g32780 PE=2 SV=1}	{jcu:105632473; K00121 frmA, ADH5, adhC S-(hydroxymethyl)glutathione dehydrogenase / alcohol dehydrogenase [EC:1.1.1.284 1.1.1.1] 1.1.1.284,1.1.1.1 ko01200; Metabolism; Global and overview maps; Carbon metabolism | ko01220; Metabolism; Global and overview maps; Degradation of aromatic compounds | ko00010; Metabolism; Carbohydrate metabolism; Glycolysis / Gluconeogenesis | ko00680; Metabolism; Ene…	{At5g43940; KOG0022 Alcohol dehydrogenase, class III Q Secondary metabolites biosynthesis, transport and catabolism ;}	{GO:0055114; oxidation-reduction process; biological_process GO:0051287; NAD binding; molecular_function}	{XM_006494869.1; PREDICTED: Citrus sinensis alcohol dehydrogenase-like 2 (LOC102622247), mRNA}	{PF02826:D-isomer specific 2-hydroxyacid dehydrogenase, NAD binding domain PF00107:Zinc-binding dehydrogenase PF08240:Alcohol dehydrogenase GroES-like domain}	17a,17b,22,51,56
quercetin-3-rutinoside(17a)	transcript_HQ_HBZL_transcript10702/f3p0/2044	-0.894427	0.0405193	{XP_010260158.1; PREDICTED: ethylene-responsive transcription factor RAP2-7-like isoform X2 [Nelumbo nucifera]}	{sp|Q9SK03|RAP27_ARATH; Ethylene-responsive transcription factor RAP2-7 OS=Arabidopsis thaliana GN=RAP2-7 PE=2 SV=2}	{nnu:104594736; K09284 AP2 AP2-like factor, euAP2 lineage - -}	{NA}	{GO:0003700; sequence-specific DNA binding transcription factor activity; molecular_function GO:0006355; regulation of transcription, DNA-dependent; biological_process}	{XM_008226760.2; PREDICTED: Prunus mume ethylene-responsive transcription factor RAP2-7 (LOC103324655), transcript variant X2, mRNA}	{PF00847:AP2 domain}	17a,17b,22,51,56
quercetin-3-rutinoside(17a)	transcript_HQ_SCEZ_transcript6101/f4p0/2414	0.894427	0.0405193	{XP_010246150.1; PREDICTED: probable arabinosyltransferase ARAD1 isoform X1 [Nelumbo nucifera]}	{sp|Q6DBG8|ARAD1_ARATH; Probable arabinosyltransferase ARAD1 OS=Arabidopsis thaliana GN=ARAD1 PE=1 SV=1}	{egr:104443411; - - - - -}	{At3g45400; KOG1021 Acetylglucosaminyltransferase EXT1/exostosin 1 GMW Carbohydrate transport and metabolism ; Cell wall/membrane/envelope biogenesis ; Extracellular structures ;}	{NA}	{XM_018120846.1; PREDICTED: Theobroma cacao probable arabinosyltransferase ARAD1 (LOC18599770), mRNA}	{NA}	17a,17b,22,51,56
luteolin-7-O-gentiobioside(24)	transcript_HQ_HBZL_transcript5419/f2p0/2556	0.894737	0.0403431	{XP_010273011.1; PREDICTED: ABC transporter G family member 11-like [Nelumbo nucifera]}	{sp|Q8RXN0|AB11G_ARATH; ABC transporter G family member 11 OS=Arabidopsis thaliana GN=ABCG11 PE=1 SV=1}	{nnu:104604542; - - - - -}	{At1g17840; KOG0061 Transporter, ABC superfamily (Breast cancer resistance protein) Q Secondary metabolites biosynthesis, transport and catabolism ;}	{GO:0016020; membrane; cellular_component GO:0016887; ATPase activity; molecular_function GO:0005524; ATP binding; molecular_function}	{XM_003635390.2; PREDICTED: Vitis vinifera ABC transporter G family member 11 (LOC100852871), mRNA}	{PF01061:ABC-2 type transporter PF13304:AAA domain, putative AbiEii toxin, Type IV TA system PF00005:ABC transporter}	22,24,45,51,56
luteolin-7-O-gentiobioside(24)	transcript_HQ_HBZL_transcript270/f2p0/4827	0.894737	0.0403431	{XP_010254256.1; PREDICTED: pleiotropic drug resistance protein 1-like [Nelumbo nucifera]}	{sp|Q76CU2|PDR1_TOBAC; Pleiotropic drug resistance protein 1 OS=Nicotiana tabacum GN=PDR1 PE=2 SV=1}	{nnu:104595282; - - - - -}	{At1g15520; KOG0065 Pleiotropic drug resistance proteins (PDR1-15), ABC superfamily Q Secondary metabolites biosynthesis, transport and catabolism ;}	{GO:0098519; NA GO:0005525; GTP binding; molecular_function GO:0016020; membrane; cellular_component GO:0005524; ATP binding; molecular_function GO:0016887; ATPase activity; molecular_function GO:0003924; GTPase activity; molecular_function}	{XM_012221260.1; PREDICTED: Jatropha curcas pleiotropic drug resistance protein 1-like (LOC105637689), transcript variant X3, mRNA}	{PF03193:Protein of unknown function, DUF258 PF01061:ABC-2 type transporter PF00005:ABC transporter PF03266:NTPase PF00004:ATPase family associated with various cellular activities (AAA) PF13304:AAA domain, putative AbiEii toxin, Type IV TA system}	22,24,45,51,56
quercetin-3-rutinoside(17a)	transcript_HQ_HBZL_transcript12804/f3p0/1837	-0.894427	0.0405193	{XP_007042481.2; PREDICTED: scopoletin glucosyltransferase [Theobroma cacao]}	{sp|Q9AT54|SCGT_TOBAC; Scopoletin glucosyltransferase OS=Nicotiana tabacum GN=TOGT1 PE=1 SV=1}	{cic:CICLE_v10028305mg; - - - - -}	{At4g34131; KOG1192 UDP-glucuronosyl and UDP-glucosyl transferase GC Carbohydrate transport and metabolism ; Energy production and conversion ;}	{GO:0016758; transferase activity, transferring hexosyl groups; molecular_function GO:0008152; NA}	{XM_010262307.2; PREDICTED: Nelumbo nucifera scopoletin glucosyltransferase-like (LOC104599680), mRNA}	{PF00201:UDP-glucoronosyl and UDP-glucosyl transferase}	17a,17b,22,51,56
quercetin-3-rutinoside(17a)	transcript_HQ_SCEZ_transcript13195/f10p0/1775	0.894427	0.0405193	{AEL97574.1; bHLH [Epimedium sagittatum]}	{sp|Q8S3D1|BH068_ARATH; Transcription factor bHLH68 OS=Arabidopsis thaliana GN=BHLH68 PE=2 SV=2}	{vvi:100249096; - - - - -}	{NA}	{GO:0005741; mitochondrial outer membrane; cellular_component GO:0006886; intracellular protein transport; biological_process GO:0046983; protein dimerization activity; molecular_function}	{JN037696.1; Epimedium sagittatum bHLH (bHLH) mRNA, complete cds}	{PF04281:Mitochondrial import receptor subunit Tom22 PF00010:Helix-loop-helix DNA-binding domain}	17a,17b,22,51,56
luteolin-7-O-gentiobioside(24)	transcript_HQ_HBZL_transcript20323/f5p0/1216	0.894737	0.0403431	{XP_010659811.2; PREDICTED: peroxidase 5 [Vitis vinifera]}	{sp|A7QEU4|PER5_VITVI; Peroxidase 5 OS=Vitis vinifera GN=GSVIVT00037159001 PE=1 SV=2}	{vvi:104881373; K00430 E1.11.1.7 peroxidase 1.11.1.7 ko00940; Metabolism; Biosynthesis of other secondary metabolites; Phenylpropanoid biosynthesis}	{NA}	{GO:0006979; response to oxidative stress; biological_process GO:0007155; cell adhesion; biological_process GO:0051015; actin filament binding; molecular_function GO:0020037; heme binding; molecular_function GO:0004601; peroxidase activity; molecular_function GO:0016020; membrane; cellular_component GO:0055114; oxidation-reduction process; biological_process}	{XM_002530416.1; PREDICTED: Ricinus communis peroxidase 5 (LOC8283103), mRNA}	{PF01044:Vinculin family PF02687:FtsX-like permease family PF00141:Peroxidase}	22,24,45,51,56
quercetin-3-rutinoside(17a)	transcript_HQ_HBZL_transcript12321/f4p0/1864	-0.894427	0.0405193	{BAO04172.1; hypothetical protein [Delphinium grandiflorum]}	{sp|Q7XSK0|BGL18_ORYSJ; Beta-glucosidase 18 OS=Oryza sativa subsp. japonica GN=BGLU18 PE=3 SV=2}	{nta:107769686; - - - - -}	{At1g61820; KOG0626 Beta-glucosidase, lactase phlorizinhydrolase, and related proteins G Carbohydrate transport and metabolism ;}	{GO:0005975; carbohydrate metabolic process; biological_process GO:0004553; hydrolase activity, hydrolyzing O-glycosyl compounds; molecular_function}	{NA}	{PF00232:Glycosyl hydrolase family 1}	17a,17b,22,51,56
quercetin-3-rutinoside(17a)	transcript_HQ_HBZL_transcript3195/f2p0/2937	-0.894427	0.0405193	{XP_010268324.1; PREDICTED: WRKY transcription factor SUSIBA2-like isoform X1 [Nelumbo nucifera]}	{sp|Q9FG77|WRKY2_ARATH; Probable WRKY transcription factor 2 OS=Arabidopsis thaliana GN=WRKY2 PE=1 SV=1}	{pmum:103318792; K18835 WRKY2 WRKY transcription factor 2 - ko04626; Organismal Systems; Environmental adaptation; Plant-pathogen interaction}	{NA}	{GO:0003700; sequence-specific DNA binding transcription factor activity; molecular_function GO:0043565; sequence-specific DNA binding; molecular_function GO:0006355; regulation of transcription, DNA-dependent; biological_process}	{XM_016020284.1; PREDICTED: Ziziphus jujuba WRKY transcription factor SUSIBA2-like (LOC107412508), mRNA}	{PF03106:WRKY DNA -binding domain}	17a,17b,22,51,56
luteolin-7-O-gentiobioside(24)	transcript_HQ_HBZL_transcript19658/f2p0/1285	0.894737	0.0403431	{KHG14121.1; Pathogen-related [Gossypium arboreum]}	{sp|P16273|PRPX_HORVU; Pathogen-related protein OS=Hordeum vulgare PE=2 SV=2}	{pper:PRUPE_ppa010660mg; - - - - -}	{NA}	{NA}	{NA}	{NA}	22,24,45,51,56
luteolin-7-O-gentiobioside(24)	transcript_HQ_HBZL_transcript8805/f5p0/2149	0.894737	0.0403431	{XP_010254058.1; PREDICTED: probable plastidic glucose transporter 2 isoform X1 [Nelumbo nucifera]}	{sp|Q9FYG3|PLST2_ARATH; Probable plastidic glucose transporter 2 OS=Arabidopsis thaliana GN=At1g67300 PE=2 SV=1}	{nnu:104595156; - - - - -}	{At1g67300; KOG0254 Predicted transporter (major facilitator superfamily) R General function prediction only ;}	{GO:0016021; integral to membrane; cellular_component GO:0055085; transmembrane transport; biological_process GO:0022857; transmembrane transporter activity; molecular_function}	{XM_002324391.2; Populus trichocarpa hexose transporter family protein (POPTR_0018s08990g) mRNA, complete cds}	{PF00083:Sugar (and other) transporter PF07690:Major Facilitator Superfamily}	22,24,45,51,56
luteolin-7-O-gentiobioside(24)	transcript_HQ_HBZL_transcript19291/f2p0/1319	0.894737	0.0403431	{XP_010278594.1; PREDICTED: heat stress transcription factor B-2b-like [Nelumbo nucifera]}	{sp|Q9T0D3|HFB2B_ARATH; Heat stress transcription factor B-2b OS=Arabidopsis thaliana GN=HSFB2B PE=2 SV=1}	{nnu:104596145; K09419 HSFF heat shock transcription factor, other eukaryote - -}	{At4g11660; KOG0627 Heat shock transcription factor K Transcription ;}	{GO:0003700; sequence-specific DNA binding transcription factor activity; molecular_function GO:0043565; sequence-specific DNA binding; molecular_function GO:0006914; autophagy; biological_process GO:0006355; regulation of transcription, DNA-dependent; biological_process GO:0005634; nucleus; cellular_component}	{XM_015208371.1; PREDICTED: Solanum pennellii heat shock factor protein HSF24 (LOC107009097), mRNA}	{PF00447:HSF-type DNA-binding PF08961:Nuclear receptor-binding factor 2, autophagy regulator}	22,24,45,51,56
luteolin-7-O-gentiobioside(24)	transcript_HQ_HBZL_transcript10825/f3p0/1989	0.894737	0.0403431	{XP_010244877.1; PREDICTED: protein NUCLEAR FUSION DEFECTIVE 4 [Nelumbo nucifera]}	{sp|F4I9E1|NFD4_ARATH; Protein NUCLEAR FUSION DEFECTIVE 4 OS=Arabidopsis thaliana GN=NFD4 PE=3 SV=1}	{vvi:100251745; - - - - -}	{NA}	{GO:0055085; transmembrane transport; biological_process GO:0016021; integral to membrane; cellular_component}	{XM_007013576.2; PREDICTED: Theobroma cacao protein NUCLEAR FUSION DEFECTIVE 4 (LOC18588879), mRNA}	{PF07690:Major Facilitator Superfamily}	22,24,45,51,56
quercetin-3-rutinoside(17a)	transcript_HQ_HBZL_transcript14161/f4p0/1763	-0.894427	0.0405193	{XP_010243432.2; PREDICTED: major facilitator superfamily domain-containing protein 12-like [Nelumbo nucifera]}	{sp|Q6NUT3|MFS12_HUMAN; Major facilitator superfamily domain-containing protein 12 OS=Homo sapiens GN=MFSD12 PE=1 SV=2}	{vvi:100259681; - - - - -}	{At3g60070; KOG4830 Predicted sugar transporter G Carbohydrate transport and metabolism ;}	{GO:0055085; transmembrane transport; biological_process GO:0016021; integral to membrane; cellular_component}	{XM_019848621.1; PREDICTED: Elaeis guineensis major facilitator superfamily domain-containing protein 12-like (LOC105054582), transcript variant X2, mRNA}	{PF07690:Major Facilitator Superfamily}	17a,17b,22,51,56
quercetin-3-rutinoside(17a)	transcript_HQ_HBZL_transcript18791/f2p0/1380	-0.894427	0.0405193	{XP_010261769.1; PREDICTED: ethylene-responsive transcription factor ERF017-like [Nelumbo nucifera]}	{sp|Q84QC2|ERF17_ARATH; Ethylene-responsive transcription factor ERF017 OS=Arabidopsis thaliana GN=ERF017 PE=2 SV=1}	{vvi:100247370; - - - - -}	{NA}	{GO:0006355; regulation of transcription, DNA-dependent; biological_process GO:0003700; sequence-specific DNA binding transcription factor activity; molecular_function}	{NA}	{PF00847:AP2 domain}	17a,17b,22,51,56
luteolin-7-O-gentiobioside(24)	transcript_HQ_HBZL_transcript2181/f6p0/3194	0.894737	0.0403431	{XP_010275526.1; PREDICTED: beta-galactosidase 3-like [Nelumbo nucifera]}	{sp|Q9SCV9|BGAL3_ARATH; Beta-galactosidase 3 OS=Arabidopsis thaliana GN=BGAL3 PE=2 SV=1}	{nnu:104595588; - - - - -}	{At4g36360; KOG0496 Beta-galactosidase G Carbohydrate transport and metabolism ;}	{GO:0030246; carbohydrate binding; molecular_function GO:0009341; beta-galactosidase complex; cellular_component GO:0004565; beta-galactosidase activity; molecular_function GO:0005975; carbohydrate metabolic process; biological_process}	{XM_010277224.1; PREDICTED: Nelumbo nucifera beta-galactosidase 3-like (LOC104610553), mRNA}	{PF02449:Beta-galactosidase PF02140:Galactose binding lectin domain}	22,24,45,51,56
luteolin-7-O-gentiobioside(24)	transcript_HQ_HBZL_transcript2822/f2p0/2989	0.894737	0.0403431	{XP_010268324.1; PREDICTED: WRKY transcription factor SUSIBA2-like isoform X1 [Nelumbo nucifera]}	{sp|Q9FG77|WRKY2_ARATH; Probable WRKY transcription factor 2 OS=Arabidopsis thaliana GN=WRKY2 PE=1 SV=1}	{pmum:103318792; K18835 WRKY2 WRKY transcription factor 2 - ko04626; Organismal Systems; Environmental adaptation; Plant-pathogen interaction}	{NA}	{GO:0006355; regulation of transcription, DNA-dependent; biological_process GO:0043565; sequence-specific DNA binding; molecular_function GO:0003700; sequence-specific DNA binding transcription factor activity; molecular_function}	{XM_016020284.1; PREDICTED: Ziziphus jujuba WRKY transcription factor SUSIBA2-like (LOC107412508), mRNA}	{PF03106:WRKY DNA -binding domain}	22,24,45,51,56
luteolin-7-O-gentiobioside(24)	transcript_HQ_HBZL_transcript15154/f15p0/1636	0.894737	0.0403431	{XP_010262784.1; PREDICTED: uncharacterized acetyltransferase At3g50280-like [Nelumbo nucifera]}	{sp|Q9FF86|DCR_ARATH; BAHD acyltransferase DCR OS=Arabidopsis thaliana GN=DCR PE=2 SV=1}	{nnu:104596982; - - - - -}	{NA}	{GO:0016747; transferase activity, transferring acyl groups other than amino-acyl groups; molecular_function}	{XM_004246289.3; PREDICTED: Solanum lycopersicum uncharacterized acetyltransferase At3g50280 (LOC101252712), mRNA}	{PF02458:Transferase family}	22,24,45,51,56
luteolin-7-O-gentiobioside(24)	transcript_HQ_HBZL_transcript16837/f2p0/1558	0.894737	0.0403431	{XP_010240927.1; PREDICTED: gibberellin 2-beta-dioxygenase 8-like [Nelumbo nucifera]}	{sp|O49561|G2OX8_ARATH; Gibberellin 2-beta-dioxygenase 8 OS=Arabidopsis thaliana GN=GA2OX8 PE=1 SV=2}	{cann:107859548; - - - - -}	{At4g21200; KOG0143 Iron/ascorbate family oxidoreductases QR Secondary metabolites biosynthesis, transport and catabolism ; General function prediction only ;}	{GO:0016491; oxidoreductase activity; molecular_function GO:0055114; oxidation-reduction process; biological_process}	{XM_002316572.2; Populus trichocarpa hypothetical protein (POPTR_0011s00340g) mRNA, complete cds}	{PF03171:2OG-Fe(II) oxygenase superfamily}	22,24,45,51,56
luteolin-7-O-gentiobioside(24)	transcript_HQ_HBZL_transcript11319/f2p0/1934	0.894737	0.0403431	{XP_010277296.1; PREDICTED: delta(24)-sterol reductase [Nelumbo nucifera]}	{sp|P93472|DIM_PEA; Delta(24)-sterol reductase OS=Pisum sativum GN=DIM PE=1 SV=1}	{vvi:100258158; K09828 DHCR24, DWF1 Delta24-sterol reductase [EC:1.3.1.72 1.3.1.-] 1.3.1.72,1.3.1.- ko00100; Metabolism; Lipid metabolism; Steroid biosynthesis}	{At3g19820; KOG1262 FAD-binding protein DIMINUTO R General function prediction only ;}	{GO:0016491; oxidoreductase activity; molecular_function GO:0055114; oxidation-reduction process; biological_process GO:0050660; flavin adenine dinucleotide binding; molecular_function}	{XM_007222407.1; Prunus persica hypothetical protein (PRUPE_ppa003520mg) mRNA, complete cds}	{PF01565:FAD binding domain }	22,24,45,51,56
luteolin-7-O-gentiobioside(24)	transcript_HQ_HBZL_transcript21174/f8p0/1142	0.894737	0.0403431	{XP_002283838.1; PREDICTED: zinc finger AN1 and C2H2 domain-containing stress-associated protein 16 [Vitis vinifera]}	{sp|Q0D5B9|SAP16_ORYSJ; Zinc finger AN1 and C2H2 domain-containing stress-associated protein 16 OS=Oryza sativa subsp. japonica GN=SAP16 PE=2 SV=2}	{pper:PRUPE_ppa009445mg; - - - - -}	{At3g57480; KOG3183 Predicted Zn-finger protein R General function prediction only ;}	{GO:0008270; zinc ion binding; molecular_function GO:0046872; metal ion binding; molecular_function}	{XM_007028722.2; PREDICTED: Theobroma cacao zinc finger AN1 and C2H2 domain-containing stress-associated protein 11 (LOC18598971), mRNA}	{PF16622:zinc-finger C2H2-type PF01428:AN1-like Zinc finger PF13912:C2H2-type zinc finger PF00096:Zinc finger, C2H2 type}	22,24,45,51,56
quercetin-3-rutinoside(17a)	transcript_HQ_HBZL_transcript23025/f2p0/920	-0.894427	0.0405193	{CDO98227.1; unnamed protein product [Coffea canephora]}	{sp|Q6IEK5|WRK76_ORYSI; WRKY transcription factor WRKY76 OS=Oryza sativa subsp. indica GN=WRKY76 PE=2 SV=1}	{jcu:105630314; - - - - -}	{NA}	{GO:0043565; sequence-specific DNA binding; molecular_function GO:0006355; regulation of transcription, DNA-dependent; biological_process GO:0003700; sequence-specific DNA binding transcription factor activity; molecular_function}	{NM_001305705.1; Cucumis sativus probable WRKY transcription factor 40 (WRKY21), mRNA}	{PF03106:WRKY DNA -binding domain}	17a,17b,22,51,56
luteolin-7-O-gentiobioside(24)	transcript_HQ_HBZL_transcript4998/f2p0/2593	0.894737	0.0403431	{ACH87168.1; senescence-related protein [Camellia sinensis]}	{sp|O48832|ERD7_ARATH; Protein EARLY-RESPONSIVE TO DEHYDRATION 7, chloroplastic OS=Arabidopsis thaliana GN=ERD7 PE=1 SV=1}	{egu:105044044; K19366 SPG20 spartin - ko04144; Cellular Processes; Transport and catabolism; Endocytosis}	{NA}	{NA}	{XM_002305476.2; Populus trichocarpa EARLY-RESPONSIVE TO DEHYDRATION 7 family protein (POPTR_0004s17980g) mRNA, complete cds}	{NA}	22,24,45,51,56
luteolin-7-O-gentiobioside(24)	transcript_HQ_HBZL_transcript13655/f2p0/1778	0.894737	0.0403431	{XP_010251709.1; PREDICTED: protein ZINC INDUCED FACILITATOR-LIKE 1-like [Nelumbo nucifera]}	{sp|Q8RWN2|ZIF1_ARATH; Protein ZINC INDUCED FACILITATOR 1 OS=Arabidopsis thaliana GN=ZIF1 PE=1 SV=2}	{nnu:109113871; - - - - -}	{At3g43790; KOG2615 Permease of the major facilitator superfamily R General function prediction only ;}	{GO:0016020; membrane; cellular_component GO:0009539; photosystem II reaction center; cellular_component GO:0055085; transmembrane transport; biological_process GO:0009523; photosystem II; cellular_component GO:0015979; photosynthesis; biological_process GO:0016021; integral to membrane; cellular_component}	{XM_018963410.1; PREDICTED: Juglans regia probable peptide/nitrate transporter At3g43790 (LOC108989699), transcript variant X3, mRNA}	{PF07690:Major Facilitator Superfamily PF02468:Photosystem II reaction centre N protein (psbN)}	22,24,45,51,56
luteolin-7-O-gentiobioside(24)	transcript_HQ_HBZL_transcript21771/f45p0/1001	0.894737	0.0403431	{ADF87393.1; class II chitinase [Arachis hypogaea]}	{sp|Q5NB11|CHI10_ORYSJ; Chitinase 10 OS=Oryza sativa subsp. japonica GN=Cht10 PE=2 SV=1}	{gmx:100785397; - - - - -}	{At4g01700; KOG4742 Predicted chitinase R General function prediction only ;}	{GO:0006032; chitin catabolic process; biological_process GO:0004568; chitinase activity; molecular_function GO:0016998; cell wall macromolecule catabolic process; biological_process}	{XM_017378895.1; PREDICTED: Daucus carota subsp. sativus chitinase 10 (LOC108208365), mRNA}	{PF00182:Chitinase class I}	22,24,45,51,56
quercetin-3-rutinoside(17a)	transcript_HQ_HBZL_transcript17756/f3p0/1468	-0.894427	0.0405193	{XP_010023738.1; PREDICTED: chalcone synthase 1 [Eucalyptus grandis]}	{sp|Q9XJ58|CHS1_CITSI; Chalcone synthase 1 OS=Citrus sinensis GN=CHS1 PE=2 SV=1}	{pop:POPTR_0001s14320g; K00660 CHS chalcone synthase 2.3.1.74 ko00941; Metabolism; Biosynthesis of other secondary metabolites; Flavonoid biosynthesis | ko04712; Organismal Systems; Environmental adaptation; Circadian rhythm - plant}	{NA}	{GO:0006633; fatty acid biosynthetic process; biological_process GO:0016020; membrane; cellular_component GO:0016747; transferase activity, transferring acyl groups other than amino-acyl groups; molecular_function GO:0004315; 3-oxoacyl-[acyl-carrier-protein] synthase activity; molecular_function}	{X68106.1; M.sativa msCHSI mRNA for chalcone synthase}	{PF08392:FAE1/Type III polyketide synthase-like protein PF08545:3-Oxoacyl-[acyl-carrier-protein (ACP)] synthase III}	17a,17b,22,51,56
quercetin-3-rutinoside(17a)	transcript_HQ_SCEZ_transcript10985/f2p0/1955	0.894427	0.0405193	{XP_008226249.1; PREDICTED: UDP-glycosyltransferase TURAN isoform X1 [Prunus mume]}	{sp|Q8L7M0|TUN_ARATH; UDP-glycosyltransferase TURAN OS=Arabidopsis thaliana GN=TUN PE=2 SV=1}	{mdm:103445749; K03842 ALG1 beta-1,4-mannosyltransferase 2.4.1.142 ko00510; Metabolism; Glycan biosynthesis and metabolism; N-Glycan biosynthesis | ko00513; Metabolism; Glycan biosynthesis and metabolism; Various types of N-glycan biosynthesis}	{At1g16570; KOG2941 Beta-1,4-mannosyltransferase O Posttranslational modification, protein turnover, chaperones ;}	{NA}	{XM_008228027.2; PREDICTED: Prunus mume UDP-glycosyltransferase TURAN (LOC103325836), transcript variant X1, mRNA}	{NA}	17a,17b,22,51,56
luteolin-7-O-gentiobioside(24)	transcript_HQ_HBZL_transcript8176/f5p0/2174	0.894737	0.0403431	{XP_010246046.1; PREDICTED: uncharacterized zinc finger protein At4g06634 [Nelumbo nucifera]}	{sp|Q2V3L3|Y4634_ARATH; Uncharacterized zinc finger protein At4g06634 OS=Arabidopsis thaliana GN=At4g06634 PE=1 SV=1}	{vvi:100268146; - - - - -}	{Hs4507955; KOG1721 FOG: Zn-finger R General function prediction only ;}	{GO:0046872; metal ion binding; molecular_function}	{XM_010247744.2; PREDICTED: Nelumbo nucifera uncharacterized zinc finger protein At4g06634 (LOC104589419), mRNA}	{PF16622:zinc-finger C2H2-type PF13465:Zinc-finger double domain PF00096:Zinc finger, C2H2 type}	22,24,45,51,56
luteolin-7-O-gentiobioside(24)	transcript_HQ_HBZL_transcript880/f2p0/3851	0.894737	0.0403431	{XP_010278098.1; PREDICTED: uncharacterized protein LOC104612401 [Nelumbo nucifera]}	{NA}	{cic:CICLE_v10027875mg; - - - - -}	{NA}	{GO:0003677; DNA binding; molecular_function GO:0008270; zinc ion binding; molecular_function GO:0003676; nucleic acid binding; molecular_function GO:0006313; transposition, DNA-mediated; biological_process GO:0004803; transposase activity; molecular_function}	{XM_010275853.2; PREDICTED: Nelumbo nucifera uncharacterized LOC104609525 (LOC104609525), transcript variant X2, mRNA}	{PF04434:SWIM zinc finger PF16588:C2H2 zinc-finger PF00098:Zinc knuckle PF00872:Transposase, Mutator family}	22,24,45,51,56
quercetin-3-rutinoside(17a)	transcript_HQ_HBZL_transcript14606/f2p0/1746	-0.894427	0.0405193	{APO15267.1; glutathione reductase 2 [Prunus avium]}	{sp|Q43621|GSHRC_PEA; Glutathione reductase, cytosolic OS=Pisum sativum PE=2 SV=1}	{pmum:103324330; K00383 GSR, gor glutathione reductase (NADPH) 1.8.1.7 ko00480; Metabolism; Metabolism of other amino acids; Glutathione metabolism | ko04918; Organismal Systems; Endocrine system; Thyroid hormone synthesis}	{At3g24170; KOG0405 Pyridine nucleotide-disulphide oxidoreductase Q Secondary metabolites biosynthesis, transport and catabolism ;}	{GO:0016491; oxidoreductase activity; molecular_function GO:0045454; cell redox homeostasis; biological_process GO:0055114; oxidation-reduction process; biological_process}	{XM_007222080.1; Prunus persica hypothetical protein (PRUPE_ppa004673mg) mRNA, complete cds}	{PF02852:Pyridine nucleotide-disulphide oxidoreductase, dimerisation domain PF00070:Pyridine nucleotide-disulphide oxidoreductase PF07992:Pyridine nucleotide-disulphide oxidoreductase}	17a,17b,22,51,56
luteolin-7-O-gentiobioside(24)	transcript_HQ_HBZL_transcript20350/f16p0/1215	0.894737	0.0403431	{AAD29841.1; catechol O-methyltransferase [Thalictrum tuberosum]}	{sp|Q00763|COMT1_POPTM; Caffeic acid 3-O-methyltransferase 1 OS=Populus tremuloides GN=OMT1 PE=1 SV=1}	{rcu:8282965; K13066 E2.1.1.68, COMT caffeic acid 3-O-methyltransferase 2.1.1.68 ko00940; Metabolism; Biosynthesis of other secondary metabolites; Phenylpropanoid biosynthesis}	{At5g54160; KOG3178 Hydroxyindole-O-methyltransferase and related SAM-dependent methyltransferases R General function prediction only ;}	{GO:0046983; protein dimerization activity; molecular_function GO:0008171; O-methyltransferase activity; molecular_function GO:0006480; N-terminal protein amino acid methylation; biological_process GO:0008168; methyltransferase activity; molecular_function}	{AY268895.1; Papaver somniferum catechol O-methyltransferase mRNA, complete cds}	{PF06859:Bicoid-interacting protein 3 (Bin3) PF00891:O-methyltransferase PF08100:Dimerisation domain PF05891:AdoMet dependent proline di-methyltransferase}	22,24,45,51,56
luteolin-7-O-gentiobioside(24)	transcript_HQ_HBZL_transcript10199/f2p0/2017	0.894737	0.0403431	{XP_010264117.1; PREDICTED: glycosyltransferase-like At2g41451 [Nelumbo nucifera]}	{sp|Q9C9Z9|ELD1_ARATH; Glycosyltransferase-like KOBITO 1 OS=Arabidopsis thaliana GN=ELD1 PE=1 SV=1}	{vvi:100261913; - - - - -}	{NA}	{NA}	{XM_010243071.2; PREDICTED: Nelumbo nucifera glycosyltransferase-like At2g41451 (LOC104585997), mRNA}	{NA}	22,24,45,51,56
luteolin-7-O-gentiobioside(24)	transcript_HQ_HBZL_transcript23495/f2p0/872	0.894737	0.0403431	{XP_010240887.1; PREDICTED: cinnamoyl-CoA reductase-like SNL6 [Nelumbo nucifera]}	{sp|Q0JKZ0|SNL6_ORYSJ; Cinnamoyl-CoA reductase-like SNL6 OS=Oryza sativa subsp. japonica GN=SNL6 PE=3 SV=1}	{pop:POPTR_0003s09250g; - - - - -}	{At2g23910; KOG1502 Flavonol reductase/cinnamoyl-CoA reductase V Defense mechanisms ;}	{GO:0050662; coenzyme binding; molecular_function GO:0003824; NA}	{NA}	{PF01370:NAD dependent epimerase/dehydratase family}	22,24,45,51,56
quercetin-3-rutinoside(17a)	transcript_HQ_HBZL_transcript11521/f2p0/1943	-0.894427	0.0405193	{XP_010261472.1; PREDICTED: common plant regulatory factor 1-like isoform X1 [Nelumbo nucifera]}	{sp|Q99089|CPRF1_PETCR; Common plant regulatory factor 1 OS=Petroselinum crispum GN=CPRF1 PE=2 SV=1}	{nnu:104593420; K09060 GBF plant G-box-binding factor - -}	{NA}	{GO:1901031; NA GO:0003677; DNA binding; molecular_function GO:0005634; nucleus; cellular_component GO:0006891; intra-Golgi vesicle-mediated transport; biological_process GO:0006260; DNA replication; biological_process GO:0043565; sequence-specific DNA binding; molecular_function GO:0006355; regulation of transcription, DNA-dependent; biological_process GO:0030173; integral to Golgi membrane; cel…	{NA}	{PF06156:Protein of unknown function (DUF972) PF03131:bZIP Maf transcription factor PF00170:bZIP transcription factor PF04636:PA26 p53-induced protein (sestrin) PF07716:Basic region leucine zipper PF02183:Homeobox associated leucine zipper PF08172:CASP C terminal}	17a,17b,22,51,56
quercetin-3-rutinoside(17a)	transcript_HQ_HBZL_transcript151/f3p0/5482	-0.894427	0.0405193	{XP_010272544.1; PREDICTED: UDP-glucose:glycoprotein glucosyltransferase isoform X1 [Nelumbo nucifera]}	{sp|Q0WL80|UGGG_ARATH; UDP-glucose:glycoprotein glucosyltransferase OS=Arabidopsis thaliana GN=UGGT PE=1 SV=1}	{vvi:100256709; K11718 HUGT UDP-glucose:glycoprotein glucosyltransferase 2.4.1.- ko04141; Genetic Information Processing; Folding, sorting and degradation; Protein processing in endoplasmic reticulum}	{At1g71220; KOG1879 UDP-glucose:glycoprotein glucosyltransferase G Carbohydrate transport and metabolism ;}	{GO:0006486; protein glycosylation; biological_process GO:0016757; transferase activity, transferring glycosyl groups; molecular_function GO:0003980; UDP-glucose:glycoprotein glucosyltransferase activity; molecular_function}	{XM_010659381.2; PREDICTED: Vitis vinifera UDP-glucose:glycoprotein glucosyltransferase (LOC100256709), transcript variant X1, mRNA}	{PF06427:UDP-glucose:Glycoprotein Glucosyltransferase PF01501:Glycosyl transferase family 8}	17a,17b,22,51,56
luteolin-7-O-gentiobioside(24)	transcript_HQ_HBZL_transcript19188/f6p0/1363	0.894737	0.0403431	{XP_015887914.1; PREDICTED: 1-aminocyclopropane-1-carboxylate oxidase homolog 1-like [Ziziphus jujuba]}	{sp|Q84MB3|ACCH1_ARATH; 1-aminocyclopropane-1-carboxylate oxidase homolog 1 OS=Arabidopsis thaliana GN=At1g06620 PE=2 SV=1}	{pmum:103324122; - - - - -}	{At1g06650; KOG0143 Iron/ascorbate family oxidoreductases QR Secondary metabolites biosynthesis, transport and catabolism ; General function prediction only ;}	{GO:0055114; oxidation-reduction process; biological_process GO:0016491; oxidoreductase activity; molecular_function}	{NA}	{PF03171:2OG-Fe(II) oxygenase superfamily}	22,24,45,51,56
quercetin-3-rutinoside(17a)	transcript_HQ_HBZL_transcript5142/f7p0/2535	-0.894427	0.0405193	{ABK94960.1; unknown [Populus trichocarpa]}	{sp|Q94II3|PMTL_ARATH; Probable methyltransferase PMT21 OS=Arabidopsis thaliana GN=ERD3 PE=2 SV=1}	{pop:POPTR_0001s01380g; - - - - -}	{NA}	{GO:0008168; methyltransferase activity; molecular_function GO:0008152; NA}	{XM_010257467.2; PREDICTED: Nelumbo nucifera probable methyltransferase PMT21 (LOC104596364), transcript variant X2, mRNA}	{PF03141:Putative S-adenosyl-L-methionine-dependent methyltransferase PF08241:Methyltransferase domain}	17a,17b,22,51,56
luteolin-7-O-gentiobioside(24)	transcript_HQ_HBZL_transcript970/f2p0/3788	0.894737	0.0403431	{XP_010241807.1; PREDICTED: ABC transporter F family member 1 isoform X1 [Nelumbo nucifera]}	{sp|Q9FJH6|AB1F_ARATH; ABC transporter F family member 1 OS=Arabidopsis thaliana GN=ABCF1 PE=2 SV=1}	{pda:103707002; K06185 ABCF2 ATP-binding cassette, subfamily F, member 2 - -}	{At5g60790; KOG0927 Predicted transporter (ABC superfamily) R General function prediction only ;}	{GO:0005525; GTP binding; molecular_function GO:0003723; RNA binding; molecular_function GO:0003724; RNA helicase activity; molecular_function GO:0003924; GTPase activity; molecular_function GO:0016887; ATPase activity; molecular_function GO:0043531; ADP binding; molecular_function GO:0005524; ATP binding; molecular_function}	{XM_010243506.2; PREDICTED: Nelumbo nucifera ABC transporter F family member 1 (LOC104586322), transcript variant X2, mRNA}	{PF03193:Protein of unknown function, DUF258 PF00004:ATPase family associated with various cellular activities (AAA) PF13304:AAA domain, putative AbiEii toxin, Type IV TA system PF00005:ABC transporter PF00910:RNA helicase PF01926:50S ribosome-binding GTPase PF00931:NB-ARC domain}	22,24,45,51,56
quercetin-3-rutinoside(17a)	transcript_HQ_HBZL_transcript12457/f2p0/1903	-0.894427	0.0405193	{OAY27113.1; hypothetical protein MANES_16G100600 [Manihot esculenta]}	{sp|Q5D0W8|NPR1_ORYSI; BTB/POZ domain and ankyrin repeat-containing protein NPR1 OS=Oryza sativa subsp. indica GN=NPR1 PE=1 SV=1}	{vvi:100250996; K14508 NPR1 regulatory protein NPR1 - ko04075; Environmental Information Processing; Signal transduction; Plant hormone signal transduction}	{At4g26120; KOG0504 FOG: Ankyrin repeat R General function prediction only ;}	{NA}	{XM_010325306.2; PREDICTED: Solanum lycopersicum non-inducible immunity 1 (NIM1), transcript variant X1, mRNA}	{NA}	17a,17b,22,51,56
luteolin-7-O-gentiobioside(24)	transcript_HQ_HBZL_transcript11249/f5p0/1940	0.894737	0.0403431	{XP_015884706.1; PREDICTED: allene oxide synthase [Ziziphus jujuba]}	{sp|K4BV52|AOS1_SOLLC; Allene oxide synthase 1, chloroplastic OS=Solanum lycopersicum GN=AOS1 PE=2 SV=1}	{nnu:104595823; K01723 AOS hydroperoxide dehydratase 4.2.1.92 ko00592; Metabolism; Lipid metabolism; alpha-Linolenic acid metabolism}	{NA}	{GO:0055114; oxidation-reduction process; biological_process GO:0016705; oxidoreductase activity, acting on paired donors, with incorporation or reduction of molecular oxygen; molecular_function GO:0005506; iron ion binding; molecular_function GO:0020037; heme binding; molecular_function}	{XM_019560668.1; PREDICTED: Lupinus angustifolius allene oxide synthase 1, chloroplastic-like (LOC109327498), mRNA}	{PF00067:Cytochrome P450}	22,24,45,51,56
luteolin-7-O-gentiobioside(24)	transcript_HQ_HBZL_transcript21891/f4p0/1050	0.894737	0.0403431	{XP_007211661.1; hypothetical protein PRUPE_ppa008997mg [Prunus persica]}	{sp|P34913|HYES_HUMAN; Bifunctional epoxide hydrolase 2 OS=Homo sapiens GN=EPHX2 PE=1 SV=2}	{fve:101300222; - - - - -}	{At4g02340; KOG4178 Soluble epoxide hydrolase I Lipid transport and metabolism ;}	{NA}	{XM_013601620.1; Medicago truncatula epoxide hydrolase mRNA}	{NA}	22,24,45,51,56
luteolin-7-O-gentiobioside(24)	transcript_HQ_HBZL_transcript22483/f5p0/986	0.894737	0.0403431	{XP_010274787.1; PREDICTED: ethylene-responsive transcription factor 1B-like [Nelumbo nucifera]}	{sp|Q8LDC8|ERF92_ARATH; Ethylene-responsive transcription factor 1B OS=Arabidopsis thaliana GN=ERF1B PE=1 SV=2}	{cic:CICLE_v10005820mg; K14516 ERF1 ethylene-responsive transcription factor 1 - ko04016; Environmental Information Processing; Signal transduction; MAPK signaling pathway - plant | ko04075; Environmental Information Processing; Signal transduction; Plant hormone signal transduction}	{NA}	{GO:0003700; sequence-specific DNA binding transcription factor activity; molecular_function GO:0006355; regulation of transcription, DNA-dependent; biological_process}	{XM_003590000.2; Medicago truncatula ethylene-responsive transcription factor 1B mRNA}	{PF00847:AP2 domain}	22,24,45,51,56
quercetin-3-rutinoside(17a)	transcript_HQ_HBZL_transcript11333/f2p0/1938	-0.894427	0.0405193	{XP_010243432.2; PREDICTED: major facilitator superfamily domain-containing protein 12-like [Nelumbo nucifera]}	{sp|Q6NUT3|MFS12_HUMAN; Major facilitator superfamily domain-containing protein 12 OS=Homo sapiens GN=MFSD12 PE=1 SV=2}	{vvi:100259681; - - - - -}	{At3g60070; KOG4830 Predicted sugar transporter G Carbohydrate transport and metabolism ;}	{GO:0055085; transmembrane transport; biological_process GO:0016021; integral to membrane; cellular_component}	{XM_018126194.1; PREDICTED: Theobroma cacao major facilitator superfamily domain-containing protein 12 (LOC18593054), transcript variant X3, mRNA}	{PF07690:Major Facilitator Superfamily}	17a,17b,22,51,56
luteolin-7-O-gentiobioside(24)	transcript_HQ_HBZL_transcript3493/f25p0/2795	0.894737	0.0403431	{XP_010243154.1; PREDICTED: glycosyltransferase family protein 64 protein C5-like isoform X1 [Nelumbo nucifera]}	{sp|Q84WB7|GT645_ARATH; Glycosyltransferase family protein 64 protein C5 OS=Arabidopsis thaliana GN=At5g04500 PE=2 SV=1}	{nnu:104587301; - - - - -}	{At5g04500; KOG1022 Acetylglucosaminyltransferase EXT2/exostosin 2 GMW Carbohydrate transport and metabolism ; Cell wall/membrane/envelope biogenesis ; Extracellular structures ;}	{GO:0006024; glycosaminoglycan biosynthetic process; biological_process GO:0005975; carbohydrate metabolic process; biological_process GO:0016021; integral to membrane; cellular_component GO:0015012; heparan sulfate proteoglycan biosynthetic process; biological_process GO:0004553; hydrolase activity, hydrolyzing O-glycosyl compounds; molecular_function}	{XM_010279976.2; PREDICTED: Nelumbo nucifera glycosyltransferase family protein 64 protein C5-like (LOC104612533), mRNA}	{PF04616:Glycosyl hydrolases family 43 PF09258:Glycosyl transferase family 64 domain}	22,24,45,51,56
luteolin-7-O-gentiobioside(24)	transcript_HQ_HBZL_transcript9052/f2p0/2138	0.894737	0.0403431	{XP_018843068.1; PREDICTED: bZIP transcription factor 60-like [Juglans regia]}	{sp|Q69XV0|BZP50_ORYSJ; bZIP transcription factor 50 OS=Oryza sativa subsp. japonica GN=BZIP50 PE=2 SV=1}	{sind:105158857; - - - - -}	{NA}	{GO:0005634; nucleus; cellular_component GO:0003677; DNA binding; molecular_function GO:0006270; DNA-dependent DNA replication initiation; biological_process GO:0003700; sequence-specific DNA binding transcription factor activity; molecular_function GO:0043565; sequence-specific DNA binding; molecular_function GO:0006355; regulation of transcription, DNA-dependent; biological_process}	{XM_002510694.2; PREDICTED: Ricinus communis bZIP transcription factor 60 (LOC8269953), mRNA}	{PF07716:Basic region leucine zipper PF02724:CDC45-like protein PF04921:XAP5, circadian clock regulator PF03131:bZIP Maf transcription factor PF00170:bZIP transcription factor}	22,24,45,51,56
luteolin-7-O-gentiobioside(24)	transcript_HQ_HBZL_transcript20395/f3p0/1217	0.894737	0.0403431	{XP_010278594.1; PREDICTED: heat stress transcription factor B-2b-like [Nelumbo nucifera]}	{sp|Q6Z9C8|HFB2B_ORYSJ; Heat stress transcription factor B-2b OS=Oryza sativa subsp. japonica GN=HSFB2B PE=2 SV=1}	{nnu:104596145; K09419 HSFF heat shock transcription factor, other eukaryote - -}	{At4g11660; KOG0627 Heat shock transcription factor K Transcription ;}	{GO:0006355; regulation of transcription, DNA-dependent; biological_process GO:0006260; DNA replication; biological_process GO:0043565; sequence-specific DNA binding; molecular_function GO:0003700; sequence-specific DNA binding transcription factor activity; molecular_function GO:0005634; nucleus; cellular_component}	{XM_010280292.2; PREDICTED: Nelumbo nucifera heat stress transcription factor B-2b-like (LOC104612735), mRNA}	{PF02344:Myc leucine zipper domain PF07716:Basic region leucine zipper PF06156:Protein of unknown function (DUF972) PF00447:HSF-type DNA-binding PF01166:TSC-22/dip/bun family}	22,24,45,51,56
luteolin-7-O-gentiobioside(24)	transcript_HQ_HBZL_transcript12069/f5p0/1879	0.894737	0.0403431	{XP_011018667.1; PREDICTED: beta-amylase 3, chloroplastic-like [Populus euphratica]}	{sp|O23553|BAM3_ARATH; Beta-amylase 3, chloroplastic OS=Arabidopsis thaliana GN=BAM3 PE=1 SV=3}	{pop:POPTR_0003s03330g; K01177 E3.2.1.2 beta-amylase 3.2.1.2 ko00500; Metabolism; Carbohydrate metabolism; Starch and sucrose metabolism}	{NA}	{GO:0016161; beta-amylase activity; molecular_function GO:0000272; polysaccharide catabolic process; biological_process}	{KF906412.1; Camellia sinensis cultivar Longjin 43 chloroplast beta-amylase 3 (BAM3) mRNA, complete cds; nuclear gene for chloroplast product}	{PF01373:Glycosyl hydrolase family 14}	22,24,45,51,56
quercetin-3-rutinoside(17a)	transcript_HQ_HBZL_transcript18014/f2p0/1462	-0.894427	0.0405193	{XP_010258314.1; PREDICTED: agamous-like MADS-box protein AGL65 isoform X1 [Nelumbo nucifera]}	{sp|Q7X9I0|AGL65_ARATH; Agamous-like MADS-box protein AGL65 OS=Arabidopsis thaliana GN=AGL65 PE=1 SV=1}	{nnu:104598102; - - - - -}	{At1g18750; KOG0014 MADS box transcription factor K Transcription ;}	{GO:0003700; sequence-specific DNA binding transcription factor activity; molecular_function GO:0006355; regulation of transcription, DNA-dependent; biological_process GO:0005634; nucleus; cellular_component}	{JX680226.1; Aquilegia coerulea MADS-box protein AGL65 mRNA, partial cds}	{PF01486:K-box region}	17a,17b,22,51,56
luteolin-7-O-gentiobioside(24)	transcript_HQ_HBZL_transcript1993/f2p0/3271	0.894737	0.0403431	{EOY14111.1; Receptor serine/threonine kinase [Theobroma cacao]}	{sp|P93604|LRK10_WHEAT; Rust resistance kinase Lr10 OS=Triticum aestivum GN=LRK10 PE=2 SV=1}	{sind:105163672; - - - - -}	{NA}	{GO:0004672; protein kinase activity; molecular_function GO:0005578; proteinaceous extracellular matrix; cellular_component GO:0005515; protein binding; molecular_function GO:0005509; calcium ion binding; molecular_function GO:0006468; protein phosphorylation; biological_process GO:0007165; signal transduction; biological_process GO:0005524; ATP binding; molecular_function}	{NA}	{PF10591:Secreted protein acidic and rich in cysteine Ca binding region PF00036:EF hand PF13202:EF hand PF13405:EF-hand domain PF12763:Cytoskeletal-regulatory complex EF hand PF07714:Protein tyrosine kinase PF00069:Protein kinase domain PF13833:EF-hand domain pair PF13499:EF-hand domain pair}	22,24,45,51,56
luteolin-7-O-gentiobioside(24)	transcript_HQ_HBZL_transcript12826/f4p0/1828	0.894737	0.0403431	{OAY59745.1; hypothetical protein MANES_01G056000 [Manihot esculenta]}	{sp|Q8L868|E1311_ARATH; Glucan endo-1,3-beta-glucosidase 11 OS=Arabidopsis thaliana GN=At1g32860 PE=1 SV=1}	{cic:CICLE_v10020391mg; - - - - -}	{NA}	{GO:0004553; hydrolase activity, hydrolyzing O-glycosyl compounds; molecular_function GO:0005975; carbohydrate metabolic process; biological_process}	{NA}	{PF00332:Glycosyl hydrolases family 17}	22,24,45,51,56
luteolin-7-O-gentiobioside(24)	transcript_HQ_HBZL_transcript13099/f6p0/1815	0.894737	0.0403431	{XP_010243240.1; PREDICTED: probable glucuronoxylan glucuronosyltransferase IRX7 [Nelumbo nucifera]}	{sp|Q9ZUV3|IRX7_ARATH; Probable glucuronoxylan glucuronosyltransferase IRX7 OS=Arabidopsis thaliana GN=IRX7 PE=2 SV=1}	{pvu:PHAVU_011G085300g; K20889 IRX7, FRA8, F8H probable glucuronoxylan glucuronosyltransferase IRX7 [EC2.4.1.-] - -}	{At2g28110; KOG1021 Acetylglucosaminyltransferase EXT1/exostosin 1 GMW Carbohydrate transport and metabolism ; Cell wall/membrane/envelope biogenesis ; Extracellular structures ;}	{NA}	{XM_013609382.1; Medicago truncatula glucuronoxylan glucuronosyltransferase, putative mRNA}	{NA}	22,24,45,51,56
luteolin-7-O-gentiobioside(24)	transcript_HQ_HBZL_transcript19656/f2p0/1194	0.894737	0.0403431	{XP_010267936.1; PREDICTED: transcription factor bHLH147-like [Nelumbo nucifera]}	{sp|Q9C8Z9|BH148_ARATH; Transcription factor bHLH148 OS=Arabidopsis thaliana GN=BHLH148 PE=1 SV=1}	{nnu:104598747; - - - - -}	{NA}	{NA}	{NA}	{NA}	22,24,45,51,56
quercetin-3-rutinoside(17a)	transcript_HQ_HBZL_transcript22242/f5p0/1016	-0.894427	0.0405193	{XP_002284743.1; PREDICTED: thioredoxin-like 4, chloroplastic isoform X1 [Vitis vinifera]}	{sp|Q9C5C5|TRL4_ARATH; Thioredoxin-like 4, chloroplastic OS=Arabidopsis thaliana GN=At1g07700 PE=2 SV=1}	{jcu:105633645; - - - - -}	{At1g07700; KOG2151 Predicted transcriptional regulator KDR Transcription ; Cell cycle control, cell division, chromosome partitioning ; General function prediction only ;}	{GO:0016209; NA GO:0055114; oxidation-reduction process; biological_process GO:0016491; oxidoreductase activity; molecular_function GO:0045454; cell redox homeostasis; biological_process}	{XM_016105443.1; PREDICTED: Arachis duranensis thioredoxin-like 4, chloroplastic (LOC107484894), transcript variant X4, mRNA}	{PF00085:Thioredoxin PF08240:Alcohol dehydrogenase GroES-like domain PF00578:AhpC/TSA family}	17a,17b,22,51,56
luteolin-7-O-gentiobioside(24)	transcript_HQ_HBZL_transcript26888/f2p0/520	0.894737	0.0403431	{XP_004297248.1; PREDICTED: uncharacterized protein LOC101314077 [Fragaria vesca subsp. vesca]}	{NA}	{pxb:103947247; - - - - -}	{NA}	{GO:0005634; nucleus; cellular_component GO:0006355; regulation of transcription, DNA-dependent; biological_process GO:0043189; H4/H2A histone acetyltransferase complex; cellular_component}	{XM_012212373.1; PREDICTED: Jatropha curcas uncharacterized LOC105630533 (LOC105630533), mRNA}	{PF07904:Chromatin modification-related protein EAF7}	22,24,45,51,56
luteolin-7-O-gentiobioside(24)	transcript_HQ_HBZL_transcript26501/f2p0/567	0.894737	0.0403431	{KHN22856.1; Xyloglucan endotransglucosylase/hydrolase protein 9 [Glycine soja]}	{sp|Q8LDW9|XTH9_ARATH; Xyloglucan endotransglucosylase/hydrolase protein 9 OS=Arabidopsis thaliana GN=XTH9 PE=2 SV=2}	{gmx:100785982; K08235 E2.4.1.207 xyloglucan:xyloglucosyl transferase 2.4.1.207 -}	{NA}	{GO:0016762; xyloglucan:xyloglucosyl transferase activity; molecular_function GO:0004553; hydrolase activity, hydrolyzing O-glycosyl compounds; molecular_function GO:0006073; cellular glucan metabolic process; biological_process GO:0005618; cell wall; cellular_component GO:0005975; carbohydrate metabolic process; biological_process GO:0048046; apoplast; cellular_component}	{XM_019394124.1; PREDICTED: Nicotiana attenuata xyloglucan endotransglucosylase/hydrolase protein 9 (LOC109228881), mRNA}	{PF00722:Glycosyl hydrolases family 16 PF06955:Xyloglucan endo-transglycosylase (XET) C-terminus}	22,24,45,51,56
quercetin-3-rutinoside(17a)	transcript_HQ_HBZL_transcript18569/f3p0/1337	-0.894427	0.0405193	{XP_010247465.1; PREDICTED: purine permease 3-like [Nelumbo nucifera]}	{sp|Q9FZ95|PUP3_ARATH; Purine permease 3 OS=Arabidopsis thaliana GN=PUP3 PE=2 SV=1}	{nnu:104590480; - - - - -}	{NA}	{GO:0016021; integral to membrane; cellular_component GO:0016020; membrane; cellular_component}	{NA}	{PF00892:EamA-like transporter family}	17a,17b,22,51,56
luteolin-7-O-gentiobioside(24)	transcript_HQ_HBZL_transcript24999/f2p0/716	0.894737	0.0403431	{JAT64620.1; S-norcoclaurine synthase [Anthurium amnicola]}	{NA}	{ini:109158411; - - - - -}	{NA}	{GO:0006952; defense response; biological_process GO:0009607; response to biotic stimulus; biological_process}	{NA}	{PF00407:Pathogenesis-related protein Bet v I family}	22,24,45,51,56
quercetin-3-rutinoside(17a)	transcript_HQ_HBZL_transcript5945/f2p0/2448	-0.894427	0.0405193	{XP_010255559.1; PREDICTED: SPX domain-containing membrane protein At4g22990 [Nelumbo nucifera]}	{sp|Q93ZQ5|SPXM3_ARATH; SPX domain-containing membrane protein At4g22990 OS=Arabidopsis thaliana GN=At4g22990 PE=2 SV=2}	{nnu:104596196; - - - - -}	{At4g11810_2; KOG2325 Predicted transporter/transmembrane protein R General function prediction only ;}	{GO:0055085; transmembrane transport; biological_process GO:0016021; integral to membrane; cellular_component GO:0022857; transmembrane transporter activity; molecular_function}	{XM_010257262.2; PREDICTED: Nelumbo nucifera SPX domain-containing membrane protein At4g22990 (LOC104596196), transcript variant X5, mRNA}	{PF00083:Sugar (and other) transporter PF07690:Major Facilitator Superfamily}	17a,17b,22,51,56
luteolin-7-O-gentiobioside(24)	transcript_HQ_HBZL_transcript13281/f2p0/1789	0.894737	0.0403431	{XP_010248638.1; PREDICTED: ferric reduction oxidase 8, mitochondrial [Nelumbo nucifera]}	{sp|Q8VY13|FRO8_ARATH; Ferric reduction oxidase 8, mitochondrial OS=Arabidopsis thaliana GN=FRO8 PE=1 SV=1}	{nnu:104591492; K00521 E1.16.1.7 ferric-chelate reductase 1.16.1.7 -}	{At5g50160; KOG0039 Ferric reductase, NADH/NADPH oxidase and related proteins PQ Inorganic ion transport and metabolism ; Secondary metabolites biosynthesis, transport and catabolism ;}	{GO:0055114; oxidation-reduction process; biological_process GO:0016491; oxidoreductase activity; molecular_function}	{NA}	{PF08022:FAD-binding domain PF00175:Oxidoreductase NAD-binding domain PF08030:Ferric reductase NAD binding domain}	22,24,45,51,56
quercetin-3-rutinoside(17a)	transcript_HQ_SCEZ_transcript15933/f4p0/1573	0.894427	0.0405193	{XP_010278970.1; PREDICTED: nuclear transcription factor Y subunit A-7-like isoform X1 [Nelumbo nucifera]}	{sp|Q9LXV5|NFYA1_ARATH; Nuclear transcription factor Y subunit A-1 OS=Arabidopsis thaliana GN=NFYA1 PE=2 SV=1}	{nnu:104597408; K08064 NFYA nuclear transcription factor Y, alpha - ko04612; Organismal Systems; Immune system; Antigen processing and presentation | ko05152; Human Diseases; Infectious diseases: Bacterial; Tuberculosis}	{At5g12840; KOG1561 CCAAT-binding factor, subunit B (HAP2) K Transcription ;}	{GO:0003700; sequence-specific DNA binding transcription factor activity; molecular_function GO:0006355; regulation of transcription, DNA-dependent; biological_process}	{XM_010258908.2; PREDICTED: Nelumbo nucifera nuclear transcription factor Y subunit A-7-like (LOC104597408), transcript variant X1, mRNA}	{PF02045:CCAAT-binding transcription factor (CBF-B/NF-YA) subunit B}	17a,17b,22,51,56
quercetin-3-rutinoside(17a)	transcript_HQ_SCEZ_transcript10113/f5p0/2022	0.894427	0.0405193	{XP_010267197.1; PREDICTED: 4-coumarate--CoA ligase-like 7 [Nelumbo nucifera]}	{sp|Q9M0X9|4CLL7_ARATH; 4-coumarate--CoA ligase-like 7 OS=Arabidopsis thaliana GN=4CLL7 PE=1 SV=1}	{pper:PRUPE_ppa003893mg; K01904 4CL 4-coumarate--CoA ligase 6.2.1.12 ko00360; Metabolism; Amino acid metabolism; Phenylalanine metabolism | ko00130; Metabolism; Metabolism of cofactors and vitamins; Ubiquinone and other terpenoid-quinone biosynthesis | ko00940; Metabolism; Biosynthesis of other secondary metabolites; Phenylpropanoid biosynthesis}	{At4g05160; KOG1176 Acyl-CoA synthetase I Lipid transport and metabolism ;}	{GO:0008152; NA GO:0003824; NA}	{XM_004291597.2; PREDICTED: Fragaria vesca subsp. vesca 4-coumarate--CoA ligase-like 7 (LOC101299638), mRNA}	{PF00501:AMP-binding enzyme}	17a,17b,22,51,56
luteolin-7-O-gentiobioside(24)	transcript_HQ_HBZL_transcript5280/f3p0/2539	0.894737	0.0403431	{XP_010261097.1; PREDICTED: ABC transporter F family member 5 [Nelumbo nucifera]}	{sp|Q9LV93|AB5F_ARATH; ABC transporter F family member 5 OS=Arabidopsis thaliana GN=ABCF5 PE=2 SV=1}	{cmo:103484697; - - - - -}	{At5g64840; KOG0927 Predicted transporter (ABC superfamily) R General function prediction only ;}	{GO:0006260; DNA replication; biological_process GO:0005525; GTP binding; molecular_function GO:0016887; ATPase activity; molecular_function GO:0003924; GTPase activity; molecular_function GO:0005524; ATP binding; molecular_function GO:0006576; cellular biogenic amine metabolic process; biological_process GO:0006614; SRP-dependent cotranslational protein targeting to membrane; biological_process …	{XM_010262795.2; PREDICTED: Nelumbo nucifera ABC transporter F family member 5 (LOC104600004), mRNA}	{PF00448:SRP54-type protein, GTPase domain PF00005:ABC transporter PF10662:Ethanolamine utilisation - propanediol utilisation PF08477:Ras of Complex, Roc, domain of DAPkinase PF07728:AAA domain (dynein-related subfamily) PF01926:50S ribosome-binding GTPase PF02399:Origin of replication binding protein PF01637:ATPase domain predominantly from Archaea PF13304:AAA domain, putative AbiEii toxin, Type…	22,24,45,51,56
luteolin-7-O-gentiobioside(24)	transcript_HQ_HBZL_transcript23062/f3p0/917	0.894737	0.0403431	{XP_010255950.1; PREDICTED: glutathione S-transferase U17-like [Nelumbo nucifera]}	{sp|Q9FUS8|GSTUH_ARATH; Glutathione S-transferase U17 OS=Arabidopsis thaliana GN=GSTU17 PE=2 SV=1}	{nnu:104596470; K00799 GST, gst glutathione S-transferase 2.5.1.18 ko00480; Metabolism; Metabolism of other amino acids; Glutathione metabolism | ko00980; Metabolism; Xenobiotics biodegradation and metabolism; Metabolism of xenobiotics by cytochrome P450 | ko00982; Metabolism; Xenobiotics biodegradation and metabolism; Drug metabolism - cytochrome P450 | ko05204; Human Diseases; Cancers: Overview…	{At1g10360; KOG0406 Glutathione S-transferase O Posttranslational modification, protein turnover, chaperones ;}	{NA}	{NA}	{NA}	22,24,45,51,56
quercetin-3-rutinoside(17a)	transcript_HQ_HBZL_transcript11761/f2p0/1898	-0.894427	0.0405193	{XP_010274128.1; PREDICTED: alkane hydroxylase MAH1-like [Nelumbo nucifera]}	{sp|Q9FMY1|C86B1_ARATH; Cytochrome P450 86B1 OS=Arabidopsis thaliana GN=CYP86B1 PE=2 SV=1}	{nnu:104609490; - - - - -}	{At4g39490; KOG0157 Cytochrome P450 CYP4/CYP19/CYP26 subfamilies QI Secondary metabolites biosynthesis, transport and catabolism ; Lipid transport and metabolism ;}	{GO:0020037; heme binding; molecular_function GO:0005506; iron ion binding; molecular_function GO:0055114; oxidation-reduction process; biological_process GO:0016705; oxidoreductase activity, acting on paired donors, with incorporation or reduction of molecular oxygen; molecular_function}	{NA}	{PF00067:Cytochrome P450}	17a,17b,22,51,56
quercetin-3-rutinoside(17a)	transcript_HQ_HBZL_transcript348/f4p0/4544	-0.894427	0.0405193	{XP_010273226.1; PREDICTED: pleiotropic drug resistance protein 1-like [Nelumbo nucifera]}	{sp|Q76CU2|PDR1_TOBAC; Pleiotropic drug resistance protein 1 OS=Nicotiana tabacum GN=PDR1 PE=2 SV=1}	{nnu:104592320; - - - - -}	{At2g36380; KOG0065 Pleiotropic drug resistance proteins (PDR1-15), ABC superfamily Q Secondary metabolites biosynthesis, transport and catabolism ;}	{GO:0005524; ATP binding; molecular_function GO:0016301; kinase activity; molecular_function GO:0016887; ATPase activity; molecular_function GO:0003924; GTPase activity; molecular_function GO:0005525; GTP binding; molecular_function GO:0009378; four-way junction helicase activity; molecular_function GO:0016020; membrane; cellular_component GO:0002949; NA GO:0006281; DNA repair; biological_process…	{XM_010274924.1; PREDICTED: Nelumbo nucifera pleiotropic drug resistance protein 1-like (LOC104608832), mRNA}	{PF07728:AAA domain (dynein-related subfamily) PF01926:50S ribosome-binding GTPase PF00910:RNA helicase PF01637:ATPase domain predominantly from Archaea PF03266:NTPase PF13304:AAA domain, putative AbiEii toxin, Type IV TA system PF00004:ATPase family associated with various cellular activities (AAA) PF01695:IstB-like ATP binding protein PF03193:Protein of unknown function, DUF258 PF02367:Threonyl…	17a,17b,22,51,56
quercetin-3-rutinoside(17a)	transcript_HQ_HBZL_transcript16207/f9p0/1593	-0.894427	0.0405193	{CAN71050.1; hypothetical protein VITISV_003717 [Vitis vinifera]}	{sp|Q9ZWR8|ANTA_GENTR; Anthocyanin 5-aromatic acyltransferase OS=Gentiana triflora PE=1 SV=1}	{vvi:100256273; - - - - -}	{NA}	{GO:0016747; transferase activity, transferring acyl groups other than amino-acyl groups; molecular_function}	{NA}	{PF02458:Transferase family}	17a,17b,22,51,56
luteolin-7-O-gentiobioside(24)	transcript_HQ_HBZL_transcript11607/f2p0/1907	0.894737	0.0403431	{OMO52152.1; hypothetical protein CCACVL1_29334 [Corchorus capsularis]}	{sp|P17598|CATA1_GOSHI; Catalase isozyme 1 OS=Gossypium hirsutum GN=CAT1 PE=2 SV=2}	{gra:105783611; K03781 katE, CAT, catB, srpA catalase 1.11.1.6 ko01200; Metabolism; Global and overview maps; Carbon metabolism | ko00630; Metabolism; Carbohydrate metabolism; Glyoxylate and dicarboxylate metabolism | ko00380; Metabolism; Amino acid metabolism; Tryptophan metabolism | ko04016; Environmental Information Processing; Signal transduction; MAPK signaling pathway - plant | ko04011; Env…	{At4g35090; KOG0047 Catalase P Inorganic ion transport and metabolism ;}	{GO:0055114; oxidation-reduction process; biological_process GO:0020037; heme binding; molecular_function GO:0004096; catalase activity; molecular_function}	{NM_001323871.1; Ziziphus jujuba catalase isozyme 1 (LOC107419839), mRNA}	{PF00199:Catalase}	22,24,45,51,56
luteolin-7-O-gentiobioside(24)	transcript_HQ_HBZL_transcript1282/f2p0/3492	0.894737	0.0403431	{XP_010267469.1; PREDICTED: probable pectin methyltransferase QUA2 [Nelumbo nucifera]}	{sp|Q9C9Q8|PMTT_ARATH; Probable pectin methyltransferase QUA2 OS=Arabidopsis thaliana GN=QUA2 PE=1 SV=2}	{nnu:104604696; - - - - -}	{NA}	{GO:0008168; methyltransferase activity; molecular_function GO:0008152; NA}	{XM_007225113.1; Prunus persica hypothetical protein (PRUPE_ppa002227mg) mRNA, complete cds}	{PF03141:Putative S-adenosyl-L-methionine-dependent methyltransferase PF05175:Methyltransferase small domain PF08241:Methyltransferase domain}	22,24,45,51,56
luteolin-7-O-gentiobioside(24)	transcript_HQ_HBZL_transcript23592/f6p0/854	0.894737	0.0403431	{XP_002524328.1; PREDICTED: PH domain-containing protein DDB_G0287875 [Ricinus communis]}	{sp|Q9FEC1|OHP2_ARATH; Light-harvesting complex-like protein OHP2, chloroplastic OS=Arabidopsis thaliana GN=OHP2 PE=2 SV=1}	{rcu:8283195; - - - - -}	{NA}	{NA}	{XM_011044588.1; PREDICTED: Populus euphratica myb-related transcription factor, partner of profilin-like (LOC105138500), mRNA}	{NA}	22,24,45,51,56
quercetin-3-rutinoside(17a)	transcript_HQ_HBZL_transcript14460/f6p0/1719	-0.894427	0.0405193	{EOX91987.1; MATE efflux family protein [Theobroma cacao]}	{sp|Q9FKQ1|DTX27_ARATH; Protein DETOXIFICATION 27 OS=Arabidopsis thaliana GN=DTX27 PE=2 SV=1}	{mdm:103446099; K03327 TC.MATE, SLC47A, norM, mdtK, dinF multidrug resistance protein, MATE family - -}	{At5g65380; KOG1347 Uncharacterized membrane protein, predicted efflux pump R General function prediction only ;}	{GO:0016020; membrane; cellular_component GO:0015238; drug transmembrane transporter activity; molecular_function GO:0015297; antiporter activity; molecular_function GO:0006855; drug transmembrane transport; biological_process GO:0055085; transmembrane transport; biological_process}	{XM_012226244.1; PREDICTED: Jatropha curcas protein TRANSPARENT TESTA 12-like (LOC105641658), mRNA}	{PF01554:MatE}	17a,17b,22,51,56
luteolin-7-O-gentiobioside(24)	transcript_HQ_HBZL_transcript24180/f5p0/797	0.894737	0.0403431	{XP_010243826.1; PREDICTED: dehydration-responsive element-binding protein 1B-like [Nelumbo nucifera]}	{sp|Q9M0L0|DRE1A_ARATH; Dehydration-responsive element-binding protein 1A OS=Arabidopsis thaliana GN=DREB1A PE=1 SV=2}	{nnu:104587800; - - - - -}	{NA}	{GO:0003700; sequence-specific DNA binding transcription factor activity; molecular_function GO:0006355; regulation of transcription, DNA-dependent; biological_process}	{NA}	{PF00847:AP2 domain}	22,24,45,51,56
luteolin-7-O-gentiobioside(24)	transcript_HQ_HBZL_transcript20405/f4p0/1234	0.894737	0.0403431	{XP_013456043.1; L-ascorbate peroxidase [Medicago truncatula]}	{sp|P48534|APX1_PEA; L-ascorbate peroxidase, cytosolic OS=Pisum sativum GN=APX1 PE=1 SV=2}	{egr:104432832; K00434 E1.11.1.11 L-ascorbate peroxidase 1.11.1.11 ko00053; Metabolism; Carbohydrate metabolism; Ascorbate and aldarate metabolism | ko00480; Metabolism; Metabolism of other amino acids; Glutathione metabolism}	{NA}	{GO:0055114; oxidation-reduction process; biological_process GO:0006979; response to oxidative stress; biological_process GO:0020037; heme binding; molecular_function GO:0004601; peroxidase activity; molecular_function}	{FQ389986.1; Vitis vinifera clone SS0AEB19YB17}	{PF00141:Peroxidase}	22,24,45,51,56
luteolin-7-O-gentiobioside(24)	transcript_HQ_HBZL_transcript5760/f4p0/2481	0.894737	0.0403431	{XP_010258374.1; PREDICTED: probable methyltransferase PMT2 [Nelumbo nucifera]}	{sp|B9DFI7|PMT2_ARATH; Probable methyltransferase PMT2 OS=Arabidopsis thaliana GN=At1g26850 PE=2 SV=2}	{nnu:104598145; - - - - -}	{NA}	{GO:0008168; methyltransferase activity; molecular_function GO:0008152; NA}	{XM_010260074.2; PREDICTED: Nelumbo nucifera probable methyltransferase PMT2 (LOC104598145), transcript variant X2, mRNA}	{PF08241:Methyltransferase domain PF03141:Putative S-adenosyl-L-methionine-dependent methyltransferase}	22,24,45,51,56
luteolin-7-O-gentiobioside(24)	transcript_HQ_HBZL_transcript16118/f3p0/1598	0.894737	0.0403431	{XP_002281128.1; PREDICTED: UDP-glycosyltransferase 83A1 [Vitis vinifera]}	{sp|Q9SGA8|U83A1_ARATH; UDP-glycosyltransferase 83A1 OS=Arabidopsis thaliana GN=UGT83A1 PE=2 SV=1}	{vvi:100242969; - - - - -}	{At3g02100; KOG1192 UDP-glucuronosyl and UDP-glucosyl transferase GC Carbohydrate transport and metabolism ; Energy production and conversion ;}	{GO:0008152; NA GO:0016758; transferase activity, transferring hexosyl groups; molecular_function}	{NA}	{PF00201:UDP-glucoronosyl and UDP-glucosyl transferase}	22,24,45,51,56
quercetin-3-rutinoside(17a)	transcript_HQ_HBZL_transcript18485/f19p0/1391	-0.894427	0.0405193	{XP_011022512.1; PREDICTED: ethylene-responsive transcription factor ERF061 [Populus euphratica]}	{sp|Q9C7W2|ERF61_ARATH; Ethylene-responsive transcription factor ERF061 OS=Arabidopsis thaliana GN=ERF061 PE=2 SV=1}	{pop:POPTR_0003s13910g; - - - - -}	{NA}	{GO:0003700; sequence-specific DNA binding transcription factor activity; molecular_function GO:0006355; regulation of transcription, DNA-dependent; biological_process}	{XM_016615445.1; PREDICTED: Nicotiana tabacum ethylene-responsive transcription factor ERF061-like (LOC107793161), mRNA}	{PF04838:Baculoviridae late expression factor 5 PF00847:AP2 domain}	17a,17b,22,51,56
luteolin-7-O-gentiobioside(24)	transcript_HQ_HBZL_transcript19532/f3p0/1298	0.894737	0.0403431	{XP_010650057.1; PREDICTED: 1-aminocyclopropane-1-carboxylate oxidase homolog 1 [Vitis vinifera]}	{sp|Q84MB3|ACCH1_ARATH; 1-aminocyclopropane-1-carboxylate oxidase homolog 1 OS=Arabidopsis thaliana GN=At1g06620 PE=2 SV=1}	{nta:107773731; - - - - -}	{At1g04350; KOG0143 Iron/ascorbate family oxidoreductases QR Secondary metabolites biosynthesis, transport and catabolism ; General function prediction only ;}	{GO:0055114; oxidation-reduction process; biological_process GO:0016491; oxidoreductase activity; molecular_function}	{XM_019248300.1; PREDICTED: Beta vulgaris subsp. vulgaris 1-aminocyclopropane-1-carboxylate oxidase homolog 1-like (LOC104888084), mRNA}	{PF03171:2OG-Fe(II) oxygenase superfamily}	22,24,45,51,56
luteolin-7-O-gentiobioside(24)	transcript_HQ_HBZL_transcript21806/f4p0/1060	0.894737	0.0403431	{XP_006464510.1; PREDICTED: zinc finger A20 and AN1 domain-containing stress-associated protein 6-like [Citrus sinensis]}	{sp|A3BDI8|SAP8_ORYSJ; Zinc finger A20 and AN1 domain-containing stress-associated protein 8 OS=Oryza sativa subsp. japonica GN=SAP8 PE=2 SV=1}	{cit:102627186; - - - - -}	{At1g12440; KOG3173 Predicted Zn-finger protein R General function prediction only ;}	{GO:0008270; zinc ion binding; molecular_function GO:0003677; DNA binding; molecular_function}	{NA}	{PF01428:AN1-like Zinc finger PF01754:A20-like zinc finger}	22,24,45,51,56
4-hydroxy-6-propyl-2H-pyran-2-one(20)	transcript_HQ_HBZL_transcript19760/f3p0/1280	-0.894427	0.0405193	{ABY63660.1; flavonoid 3-hydroxylase [Epimedium sagittatum]}	{sp|Q9S818|FL3H_ARATH; Naringenin,2-oxoglutarate 3-dioxygenase OS=Arabidopsis thaliana GN=F3H PE=1 SV=1}	{jcu:105629005; K00475 E1.14.11.9 naringenin 3-dioxygenase 1.14.11.9 ko00941; Metabolism; Biosynthesis of other secondary metabolites; Flavonoid biosynthesis}	{At3g51240; KOG0143 Iron/ascorbate family oxidoreductases QR Secondary metabolites biosynthesis, transport and catabolism ; General function prediction only ;}	{GO:0055114; oxidation-reduction process; biological_process GO:0016491; oxidoreductase activity; molecular_function}	{DQ229150.1; Aquilegia formosa putative flavanone 3-hydroxylase (F3H) mRNA, partial cds}	{PF03171:2OG-Fe(II) oxygenase superfamily}	20,53	D
4-hydroxy-6-propyl-2H-pyran-2-one(20)	transcript_HQ_HBZL_transcript11196/f8p0/1978	-0.894427	0.0405193	{XP_010261872.1; PREDICTED: fatty-acid-binding protein 2-like isoform X1 [Nelumbo nucifera]}	{sp|Q84RK2|FAP2_ARATH; Fatty-acid-binding protein 2 OS=Arabidopsis thaliana GN=FAP2 PE=2 SV=2}	{pda:103704918; - - - - -}	{NA}	{GO:0016872; intramolecular lyase activity; molecular_function}	{XM_010650090.2; PREDICTED: Vitis vinifera fatty-acid-binding protein 2 (LOC100266232), transcript variant X4, mRNA}	{PF16035:Chalcone isomerase like PF16036:Chalcone isomerase-like PF02431:Chalcone-flavanone isomerase}	20,53
4-hydroxy-6-propyl-2H-pyran-2-one(20)	transcript_HQ_SCJY_transcript6066/f2p0/2367	-0.894427	0.0405193	{OMO52303.1; Stress up-regulated Nod 19 [Corchorus olitorius]}	{NA}	{nnu:104596392; - - - - -}	{NA}	{NA}	{NA}	{NA}	20,21
4-hydroxy-6-propyl-2H-pyran-2-one(20)	transcript_HQ_HBZL_transcript14166/f2p0/1736	-0.894427	0.0405193	{AKA88915.1; KXL4 [Aquilegia coerulea]}	{sp|P48000|KNAT3_ARATH; Homeobox protein knotted-1-like 3 OS=Arabidopsis thaliana GN=KNAT3 PE=1 SV=1}	{vvi:100246520; - - - - -}	{At5g25220; KOG0773 Transcription factor MEIS1 and related HOX domain proteins K Transcription ;}	{GO:0006355; regulation of transcription, DNA-dependent; biological_process GO:0005634; nucleus; cellular_component GO:0003677; DNA binding; molecular_function}	{KP331536.1; Aquilegia coerulea KXL4 mRNA, complete cds}	{PF05920:Homeobox KN domain PF03791:KNOX2 domain PF03789:ELK domain PF03790:KNOX1 domain PF00046:Homeobox domain}	20,53
4-hydroxy-6-propyl-2H-pyran-2-one(20)	transcript_HQ_SCEZ_transcript17049/f2p0/1495	-0.894427	0.0405193	{XP_010258526.1; PREDICTED: protein ENHANCED DISEASE RESISTANCE 2-like [Nelumbo nucifera]}	{sp|Q8VZF6|EDR2L_ARATH; Protein ENHANCED DISEASE RESISTANCE 2-like OS=Arabidopsis thaliana GN=EDR2L PE=2 SV=1}	{nnu:104598263; - - - - -}	{NA}	{NA}	{XM_008383432.2; PREDICTED: Malus x domestica protein ENHANCED DISEASE RESISTANCE 2-like (LOC103444502), transcript variant X2, mRNA}	{NA}	20,21
4-hydroxy-6-propyl-2H-pyran-2-one(20)	transcript_HQ_SCJY_transcript3597/f3p0/2658	-0.894427	0.0405193	{XP_010273394.1; PREDICTED: transcription factor GTE11 [Nelumbo nucifera]}	{sp|Q9LS28|GTE12_ARATH; Transcription factor GTE12 OS=Arabidopsis thaliana GN=GTE12 PE=2 SV=2}	{vvi:100264084; - - - - -}	{At5g46550; KOG1474 Transcription initiation factor TFIID, subunit BDF1 and related bromodomain proteins K Transcription ;}	{GO:0005515; protein binding; molecular_function}	{NA}	{PF00439:Bromodomain}	20,21
(3E)-4-[(1S,6S)-1-Hydroxy-2,2,6-trimethyl-4-oxocyclohexyl]-2-oxo-3-buten-1-yl α-L-glycero-hexopyranoside(32)	transcript_HQ_SCJY_transcript14847/f7p0/1373	0.894737	0.0403431	{AAV74397.1; geranylgeranyl diphosphate synthase [Adonis aestivalis var. palaestina]}	{sp|Q94ID7|GGPPS_HEVBR; Geranylgeranyl pyrophosphate synthase, chloroplastic OS=Hevea brasiliensis GN=GGPS PE=1 SV=1}	{rcu:8268116; K13789 GGPS geranylgeranyl diphosphate synthase, type II [EC:2.5.1.1 2.5.1.10 2.5.1.29] 2.5.1.1,2.5.1.10,2.5.1.29 ko00900; Metabolism; Metabolism of terpenoids and polyketides; Terpenoid backbone biosynthesis}	{At4g36810; KOG0776 Geranylgeranyl pyrophosphate synthase/Polyprenyl synthetase H Coenzyme transport and metabolism ;}	{GO:0008299; isoprenoid biosynthetic process; biological_process}	{XM_006430551.1; Citrus clementina hypothetical protein (CICLE_v10012011mg) mRNA, complete cds}	{PF00348:Polyprenyl synthetase}	21,32
4-hydroxy-6-propyl-2H-pyran-2-one(20)	transcript_HQ_YNLB_transcript15801/f2p0/1566	0.894427	0.0405193	{XP_010273395.1; PREDICTED: probable sodium/metabolite cotransporter BASS1, chloroplastic [Nelumbo nucifera]}	{sp|Q93YR2|BASS1_ARATH; Probable sodium/metabolite cotransporter BASS1, chloroplastic OS=Arabidopsis thaliana GN=BASS1 PE=2 SV=1}	{nnu:104608968; K03453 TC.BASS bile acid:Na+ symporter, BASS family - -}	{At1g78560; KOG2718 Na+-bile acid cotransporter P Inorganic ion transport and metabolism ;}	{GO:0016020; membrane; cellular_component}	{XM_011008542.1; PREDICTED: Populus euphratica probable sodium/metabolite cotransporter BASS1, chloroplastic (LOC105112727), mRNA}	{PF01758:Sodium Bile acid symporter family}	20,21
4-hydroxy-6-propyl-2H-pyran-2-one(20)	transcript_HQ_SCJY_transcript1670/f3p0/3107	-0.894427	0.0405193	{XP_010259644.1; PREDICTED: respiratory burst oxidase homolog protein B-like [Nelumbo nucifera]}	{sp|Q948T9|RBOHB_SOLTU; Respiratory burst oxidase homolog protein B OS=Solanum tuberosum GN=RBOHB PE=1 SV=1}	{nnu:104598989; K13447 RBOH respiratory burst oxidase [EC:1.6.3.- 1.11.1.-] 1.6.3.-,1.11.1.- ko04016; Environmental Information Processing; Signal transduction; MAPK signaling pathway - plant | ko04626; Organismal Systems; Environmental adaptation; Plant-pathogen interaction}	{At1g09090; KOG0039 Ferric reductase, NADH/NADPH oxidase and related proteins PQ Inorganic ion transport and metabolism ; Secondary metabolites biosynthesis, transport and catabolism ;}	{GO:0055114; oxidation-reduction process; biological_process GO:0009055; NA GO:0004601; peroxidase activity; molecular_function GO:0005509; calcium ion binding; molecular_function GO:0050664; oxidoreductase activity, acting on NADH or NADPH, oxygen as acceptor; molecular_function GO:0016021; integral to membrane; cellular_component GO:0016491; oxidoreductase activity; molecular_function}	{XM_002283852.3; PREDICTED: Vitis vinifera respiratory burst oxidase homolog protein B (LOC100261299), mRNA}	{PF00036:EF hand PF13405:EF-hand domain PF13499:EF-hand domain pair PF08414:Respiratory burst NADPH oxidase PF08030:Ferric reductase NAD binding domain PF01292:Prokaryotic cytochrome b561 PF13202:EF hand PF08022:FAD-binding domain}	20,21
4-hydroxy-6-propyl-2H-pyran-2-one(20)	transcript_HQ_SCJY_transcript9712/f2p0/1956	-0.894427	0.0405193	{XP_010663616.1; PREDICTED: LEAF RUST 10 DISEASE-RESISTANCE LOCUS RECEPTOR-LIKE PROTEIN KINASE-like 1.2 isoform X2 [Vitis vinifera]}	{sp|P0C5E2|LRL12_ARATH; LEAF RUST 10 DISEASE-RESISTANCE LOCUS RECEPTOR-LIKE PROTEIN KINASE-like 1.2 OS=Arabidopsis thaliana GN=LRK10L-1.2 PE=2 SV=3}	{csv:105436378; - - - - -}	{At1g18390; KOG1187 Serine/threonine protein kinase T Signal transduction mechanisms ;}	{NA}	{NA}	{NA}	20,21
4-hydroxy-6-propyl-2H-pyran-2-one(20)	transcript_HQ_YNLB_transcript16343/f2p0/1465	0.894427	0.0405193	{XP_010241674.1; PREDICTED: uncharacterized protein At4g06598-like [Nelumbo nucifera]}	{sp|Q8W3M7|Y4598_ARATH; Uncharacterized protein At4g06598 OS=Arabidopsis thaliana GN=At4g06598 PE=2 SV=2}	{vvi:100257570; - - - - -}	{NA}	{GO:0043565; sequence-specific DNA binding; molecular_function GO:0007049; cell cycle; biological_process GO:0033179; proton-transporting V-type ATPase, V0 domain; cellular_component GO:0015991; ATP hydrolysis coupled proton transport; biological_process GO:0006914; autophagy; biological_process GO:0003677; DNA binding; molecular_function GO:0006355; regulation of transcription, DNA-dependent; bi…	{XM_010659726.2; PREDICTED: Vitis vinifera uncharacterized LOC100257570 (LOC100257570), transcript variant X2, mRNA}	{PF07716:Basic region leucine zipper PF03131:bZIP Maf transcription factor PF00170:bZIP transcription factor PF06156:Protein of unknown function (DUF972) PF04977:Septum formation initiator PF01496:V-type ATPase 116kDa subunit family PF04111:Autophagy protein Apg6}	20,53
(3E)-4-[(1S,6S)-1-Hydroxy-2,2,6-trimethyl-4-oxocyclohexyl]-2-oxo-3-buten-1-yl α-L-glycero-hexopyranoside(32)	transcript_HQ_SCJY_transcript6020/f3p0/2359	0.888523	0.043925	{XP_009373930.1; PREDICTED: bifunctional 3-dehydroquinate dehydratase/shikimate dehydrogenase, chloroplastic-like isoform X2 [Pyrus x bretschneideri]}	{sp|Q9SQT8|DHQSD_ARATH; Bifunctional 3-dehydroquinate dehydratase/shikimate dehydrogenase, chloroplastic OS=Arabidopsis thaliana GN=EMB3004 PE=1 SV=1}	{nnu:104585665; K13832 aroDE, DHQ-SDH 3-dehydroquinate dehydratase / shikimate dehydrogenase [EC:4.2.1.10 1.1.1.25] 4.2.1.10,1.1.1.25 ko01230; Metabolism; Global and overview maps; Biosynthesis of amino acids | ko00400; Metabolism; Amino acid metabolism; Phenylalanine, tyrosine and tryptophan biosynthesis}	{At3g06350; KOG0692 Pentafunctional AROM protein E Amino acid transport and metabolism ;}	{NA}	{NA}	{NA}	21,32
(3E)-4-[(1S,6S)-1-Hydroxy-2,2,6-trimethyl-4-oxocyclohexyl]-2-oxo-3-buten-1-yl α-L-glycero-hexopyranoside(32)	transcript_HQ_SCEZ_transcript14896/f7p0/1682	0.894737	0.0403431	{XP_010263455.1; PREDICTED: scopoletin glucosyltransferase-like [Nelumbo nucifera]}	{sp|Q9AT54|SCGT_TOBAC; Scopoletin glucosyltransferase OS=Nicotiana tabacum GN=TOGT1 PE=1 SV=1}	{pop:POPTR_0001s30980g; - - - - -}	{At4g34131; KOG1192 UDP-glucuronosyl and UDP-glucosyl transferase GC Carbohydrate transport and metabolism ; Energy production and conversion ;}	{GO:0016758; transferase activity, transferring hexosyl groups; molecular_function GO:0008152; NA}	{NA}	{PF00201:UDP-glucoronosyl and UDP-glucosyl transferase}	21,32
4-hydroxy-6-propyl-2H-pyran-2-one(20)	transcript_HQ_HBZL_transcript16060/f5p0/1623	-0.894427	0.0405193	{XP_010275374.1; PREDICTED: 2-oxoglutarate-Fe(II) type oxidoreductase-like [Nelumbo nucifera]}	{sp|Q4W946|ENCD_ASPFU; 2-oxoglutarate-Fe(II) type oxidoreductase OS=Neosartorya fumigata (strain ATCC MYA-4609 / Af293 / CBS 101355 / FGSC A1100) GN=encD PE=1 SV=2}	{mdm:103448947; - - - - -}	{At1g35190; KOG0143 Iron/ascorbate family oxidoreductases QR Secondary metabolites biosynthesis, transport and catabolism ; General function prediction only ;}	{GO:0016491; oxidoreductase activity; molecular_function GO:0055114; oxidation-reduction process; biological_process}	{XM_010277072.2; PREDICTED: Nelumbo nucifera 2-oxoglutarate-Fe(II) type oxidoreductase-like (LOC104610455), mRNA}	{PF03171:2OG-Fe(II) oxygenase superfamily}	20,53
4-hydroxy-6-propyl-2H-pyran-2-one(20)	transcript_HQ_YNMLP_transcript7366/f2p0/2632	0.894427	0.0405193	{XP_006438501.1; hypothetical protein CICLE_v10031248mg [Citrus clementina]}	{sp|O23609|PER41_ARATH; Peroxidase 41 OS=Arabidopsis thaliana GN=PER41 PE=3 SV=1}	{vvi:100251867; - - - - -}	{NA}	{NA}	{XM_010273784.2; PREDICTED: Nelumbo nucifera uncharacterized LOC104607980 (LOC104607980), transcript variant X2, mRNA}	{NA}	20,53
4-hydroxy-6-propyl-2H-pyran-2-one(20)	transcript_HQ_SCEZ_transcript14030/f2p0/1729	0.894427	0.0405193	{KYP62166.1; Solute carrier family 35 member C2 [Cajanus cajan]}	{sp|Q9LRP2|PT317_ARATH; Probable sugar phosphate/phosphate translocator At3g17430 OS=Arabidopsis thaliana GN=At3g17430 PE=1 SV=1}	{csv:101213611; - - - - -}	{At3g17430; KOG1441 Glucose-6-phosphate/phosphate and phosphoenolpyruvate/phosphate antiporter GE Carbohydrate transport and metabolism ; Amino acid transport and metabolism ;}	{GO:0015159; polysaccharide transmembrane transporter activity; molecular_function GO:0015774; polysaccharide transport; biological_process GO:0016020; membrane; cellular_component}	{XM_010275490.2; PREDICTED: Nelumbo nucifera probable sugar phosphate/phosphate translocator At3g17430 (LOC104609238), mRNA}	{PF02563:Polysaccharide biosynthesis/export protein}	20,53
4-hydroxy-6-propyl-2H-pyran-2-one(20)	transcript_HQ_HBZL_transcript6180/f11p0/2241	-0.894427	0.0405193	{XP_010245316.1; PREDICTED: ethylene-responsive transcription factor ERF054 [Nelumbo nucifera]}	{sp|Q9SKT1|ERF53_ARATH; Ethylene-responsive transcription factor ERF053 OS=Arabidopsis thaliana GN=ERF053 PE=1 SV=1}	{pmum:103342653; - - - - -}	{NA}	{GO:0006355; regulation of transcription, DNA-dependent; biological_process GO:0003700; sequence-specific DNA binding transcription factor activity; molecular_function}	{XM_018116611.1; PREDICTED: Theobroma cacao ethylene-responsive transcription factor ERF053 (LOC18608681), mRNA}	{PF00847:AP2 domain}	20,53
4-hydroxy-6-propyl-2H-pyran-2-one(20)	transcript_HQ_YNLB_transcript18184/f2p0/1186	0.894427	0.0405193	{XP_010270477.1; PREDICTED: WUSCHEL-related homeobox 8-like [Nelumbo nucifera]}	{sp|Q5QMM3|WOX8_ORYSJ; WUSCHEL-related homeobox 8 OS=Oryza sativa subsp. japonica GN=WOX8 PE=2 SV=1}	{pda:103701108; - - - - -}	{NA}	{GO:0005634; nucleus; cellular_component GO:0006355; regulation of transcription, DNA-dependent; biological_process GO:0003677; DNA binding; molecular_function GO:0005524; ATP binding; molecular_function}	{NA}	{PF05920:Homeobox KN domain PF00046:Homeobox domain PF08880:QLQ}	20,53
4-hydroxy-6-propyl-2H-pyran-2-one(20)	transcript_HQ_SCJY_transcript16015/f9p0/1197	-0.894427	0.0405193	{XP_006842568.2; PREDICTED: cationic peroxidase 1 [Amborella trichopoda]}	{sp|P22195|PER1_ARAHY; Cationic peroxidase 1 OS=Arachis hypogaea GN=PNC1 PE=1 SV=2}	{vvi:100264885; K00430 E1.11.1.7 peroxidase 1.11.1.7 ko00940; Metabolism; Biosynthesis of other secondary metabolites; Phenylpropanoid biosynthesis}	{NA}	{GO:0055114; oxidation-reduction process; biological_process GO:0004601; peroxidase activity; molecular_function GO:0020037; heme binding; molecular_function GO:0006979; response to oxidative stress; biological_process}	{NA}	{PF00141:Peroxidase}	20,21
4-hydroxy-6-propyl-2H-pyran-2-one(20)	transcript_HQ_SCJY_transcript9209/f3p0/2005	-0.894427	0.0405193	{KYP69959.1; Metal transporter Nramp6 [Cajanus cajan]}	{sp|Q8H4H5|NRAM5_ORYSJ; Metal transporter Nramp5 OS=Oryza sativa subsp. japonica GN=NRAMP5 PE=2 SV=1}	{vra:106761140; K21398 - - - -}	{At1g80830; KOG1291 Mn2+ and Fe2+ transporters of the NRAMP family P Inorganic ion transport and metabolism ;}	{GO:0005215; NA GO:0016020; membrane; cellular_component GO:0006810; transport; biological_process}	{XM_008362779.2; PREDICTED: Malus x domestica metal transporter Nramp5-like (LOC103424684), mRNA}	{PF01566:Natural resistance-associated macrophage protein}	20,21
(3E)-4-[(1S,6S)-1-Hydroxy-2,2,6-trimethyl-4-oxocyclohexyl]-2-oxo-3-buten-1-yl α-L-glycero-hexopyranoside(32)	transcript_HQ_SCJY_transcript17725/f8p0/995	0.894737	0.0403431	{ANP21917.1; dehydration-responsive element-binding protein 1 [Papaver nudicaule]}	{sp|Q9FJ93|DRE1D_ARATH; Dehydration-responsive element-binding protein 1D OS=Arabidopsis thaliana GN=DREB1D PE=2 SV=1}	{cic:CICLE_v10021923mg; - - - - -}	{NA}	{GO:0006355; regulation of transcription, DNA-dependent; biological_process GO:0003700; sequence-specific DNA binding transcription factor activity; molecular_function}	{AC253836.1; Aquilegia coerulea clone COL06-D05, complete sequence}	{PF00847:AP2 domain}	21,32
(3E)-4-[(1S,6S)-1-Hydroxy-2,2,6-trimethyl-4-oxocyclohexyl]-2-oxo-3-buten-1-yl α-L-glycero-hexopyranoside(32)	transcript_HQ_HBZL_transcript120/f2p0/5720	0.888523	0.043925	{XP_010259592.1; PREDICTED: ABC transporter C family member 4-like isoform X1 [Nelumbo nucifera]}	{sp|Q9LZJ5|AB14C_ARATH; ABC transporter C family member 14 OS=Arabidopsis thaliana GN=ABCC14 PE=1 SV=1}	{nnu:104598966; - - - - -}	{At3g62700; KOG0054 Multidrug resistance-associated protein/mitoxantrone resistance protein, ABC superfamily Q Secondary metabolites biosynthesis, transport and catabolism ;}	{GO:0003677; DNA binding; molecular_function GO:0016301; kinase activity; molecular_function GO:0006810; transport; biological_process GO:0005525; GTP binding; molecular_function GO:0055114; oxidation-reduction process; biological_process GO:0042626; ATPase activity, coupled to transmembrane movement of substances; molecular_function GO:0055085; transmembrane transport; biological_process GO:0005…	{XM_006479876.2; PREDICTED: Citrus sinensis ABC transporter C family member 14 (LOC102623173), transcript variant X2, mRNA}	{PF03193:Protein of unknown function, DUF258 PF00437:Type II/IV secretion system protein PF13304:AAA domain, putative AbiEii toxin, Type IV TA system PF03266:NTPase PF00664:ABC transporter transmembrane region PF00931:NB-ARC domain PF01926:50S ribosome-binding GTPase PF01580:FtsK/SpoIIIE family PF00005:ABC transporter PF00142:4Fe-4S iron sulfur cluster binding proteins, NifH/frxC family PF06414:Z…	21,32
4-hydroxy-6-propyl-2H-pyran-2-one(20)	transcript_HQ_YNLB_transcript12244/f2p0/1931	0.894427	0.0405193	{XP_019077574.1; PREDICTED: probable plastidic glucose transporter 3 isoform X3 [Vitis vinifera]}	{sp|Q9FYG3|PLST2_ARATH; Probable plastidic glucose transporter 2 OS=Arabidopsis thaliana GN=At1g67300 PE=2 SV=1}	{nnu:104595156; - - - - -}	{At1g67300; KOG0254 Predicted transporter (major facilitator superfamily) R General function prediction only ;}	{GO:0055085; transmembrane transport; biological_process GO:0016021; integral to membrane; cellular_component GO:0022857; transmembrane transporter activity; molecular_function}	{XM_010255757.2; PREDICTED: Nelumbo nucifera probable plastidic glucose transporter 2 (LOC104595156), transcript variant X3, mRNA}	{PF00083:Sugar (and other) transporter PF07690:Major Facilitator Superfamily}	20,53
4-hydroxy-6-propyl-2H-pyran-2-one(20)	transcript_HQ_SCEZ_transcript7061/f2p0/2272	0.894427	0.0405193	{XP_010254014.1; PREDICTED: probable glycosyltransferase At3g07620 [Nelumbo nucifera]}	{sp|Q9FFN2|GLYT3_ARATH; Probable glycosyltransferase At5g03795 OS=Arabidopsis thaliana GN=At5g03795 PE=3 SV=2}	{nnu:104595125; - - - - -}	{At5g19670; KOG1021 Acetylglucosaminyltransferase EXT1/exostosin 1 GMW Carbohydrate transport and metabolism ; Cell wall/membrane/envelope biogenesis ; Extracellular structures ;}	{NA}	{NA}	{NA}	20,53
4-hydroxy-6-propyl-2H-pyran-2-one(20)	transcript_HQ_HBZL_transcript18571/f2p0/1392	-0.894427	0.0405193	{XP_010270300.1; PREDICTED: glutathione S-transferase TCHQD-like [Nelumbo nucifera]}	{sp|O80662|TCHQD_ARATH; Glutathione S-transferase TCHQD OS=Arabidopsis thaliana GN=TCHQD PE=2 SV=1}	{cit:102625138; - - - - -}	{At1g77290; KOG4420 Uncharacterized conserved protein (Ganglioside-induced differentiation associated protein 1, GDAP1) S Function unknown ;}	{GO:0005515; protein binding; molecular_function}	{AC253923.1; Aquilegia coerulea clone COL08-D18, complete sequence}	{PF13417:Glutathione S-transferase, N-terminal domain PF13409:Glutathione S-transferase, N-terminal domain PF02798:Glutathione S-transferase, N-terminal domain}	20,53
4-hydroxy-6-propyl-2H-pyran-2-one(20)	transcript_HQ_SCEZ_transcript18458/f2p0/1352	-0.894427	0.0405193	{XP_010268761.1; PREDICTED: NAC transcription factor 56-like [Nelumbo nucifera]}	{sp|Q9LD44|NAC56_ARATH; NAC transcription factor 56 OS=Arabidopsis thaliana GN=NAC056 PE=2 SV=1}	{rcu:8268675; - - - - -}	{NA}	{GO:0003677; DNA binding; molecular_function GO:0006355; regulation of transcription, DNA-dependent; biological_process}	{XM_017754921.1; PREDICTED: Gossypium arboreum NAC transcription factor 25-like (LOC108456322), mRNA}	{PF02365:No apical meristem (NAM) protein}	20,21
(3E)-4-[(1S,6S)-1-Hydroxy-2,2,6-trimethyl-4-oxocyclohexyl]-2-oxo-3-buten-1-yl α-L-glycero-hexopyranoside(32)	transcript_HQ_HBZL_transcript13925/f3p0/1749	-0.892218	0.0417836	{ALG05128.1; cytochrome P450 [Sinopodophyllum hexandrum]}	{sp|O81973|C93A3_SOYBN; Cytochrome P450 93A3 OS=Glycine max GN=CYP93A3 PE=2 SV=1}	{pop:POPTR_0001s07850g; - - - - -}	{At4g12300; KOG0156 Cytochrome P450 CYP2 subfamily Q Secondary metabolites biosynthesis, transport and catabolism ;}	{GO:0005506; iron ion binding; molecular_function GO:0020037; heme binding; molecular_function GO:0016705; oxidoreductase activity, acting on paired donors, with incorporation or reduction of molecular oxygen; molecular_function GO:0055114; oxidation-reduction process; biological_process}	{NA}	{PF00067:Cytochrome P450}	21,32
(3E)-4-[(1S,6S)-1-Hydroxy-2,2,6-trimethyl-4-oxocyclohexyl]-2-oxo-3-buten-1-yl α-L-glycero-hexopyranoside(32)	transcript_HQ_SCEZ_transcript21897/f2p0/1046	0.894737	0.0403431	{XP_010247015.1; PREDICTED: transcription factor ILR3-like [Nelumbo nucifera]}	{sp|Q9FH37|ILR3_ARATH; Transcription factor ILR3 OS=Arabidopsis thaliana GN=ILR3 PE=1 SV=1}	{vvi:100251621; - - - - -}	{NA}	{GO:0006886; intracellular protein transport; biological_process GO:0005861; troponin complex; cellular_component GO:0051087; chaperone binding; molecular_function GO:0006260; DNA replication; biological_process GO:0015991; ATP hydrolysis coupled proton transport; biological_process GO:0016020; membrane; cellular_component GO:0006891; intra-Golgi vesicle-mediated transport; biological_process GO:…	{XM_007211605.1; Prunus persica hypothetical protein (PRUPE_ppa009077mg) mRNA, complete cds}	{PF10186:Vacuolar sorting 38 and autophagy-related subunit 14 PF06005:Protein of unknown function (DUF904) PF09798:DNA damage checkpoint protein PF04111:Autophagy protein Apg6 PF08172:CASP C terminal PF05837:Centromere protein H (CENP-H) PF01956:Integral membrane protein DUF106 PF00992:Troponin PF03938:Outer membrane protein (OmpH-like) PF07851:TMPIT-like protein PF00010:Helix-loop-helix DNA-bind…	21,32
4-hydroxy-6-propyl-2H-pyran-2-one(20)	transcript_HQ_YNMLP_transcript13832/f2p0/1973	0.894427	0.0405193	{XP_018850543.1; PREDICTED: beta-glucuronosyltransferase GlcAT14B-like [Juglans regia]}	{sp|Q9FLD7|GT14A_ARATH; Beta-glucuronosyltransferase GlcAT14A OS=Arabidopsis thaliana GN=GLCAT14A PE=2 SV=1}	{nta:107768015; - - - - -}	{At3g15350; KOG0799 Branching enzyme G Carbohydrate transport and metabolism ;}	{GO:0008375; acetylglucosaminyltransferase activity; molecular_function GO:0016020; membrane; cellular_component}	{XM_019595972.1; PREDICTED: Lupinus angustifolius beta-glucuronosyltransferase GlcAT14B-like (LOC109353637), mRNA}	{PF02485:Core-2/I-Branching enzyme}	20,21
4-hydroxy-6-propyl-2H-pyran-2-one(20)	transcript_HQ_YNMLP_transcript4114/f2p0/3111	0.894427	0.0405193	{XP_010260358.1; PREDICTED: auxin response factor 3-like [Nelumbo nucifera]}	{sp|Q8S985|ARFO_ORYSJ; Auxin response factor 15 OS=Oryza sativa subsp. japonica GN=ARF15 PE=2 SV=1}	{nnu:104599494; K14486 K14486, ARF auxin response factor - ko04075; Environmental Information Processing; Signal transduction; Plant hormone signal transduction}	{NA}	{GO:0003677; DNA binding; molecular_function GO:0006355; regulation of transcription, DNA-dependent; biological_process GO:0009725; response to hormone stimulus; biological_process GO:0005634; nucleus; cellular_component}	{XM_010262056.2; PREDICTED: Nelumbo nucifera auxin response factor 3-like (LOC104599494), mRNA}	{PF02362:B3 DNA binding domain PF06507:Auxin response factor}	20,21
4-hydroxy-6-propyl-2H-pyran-2-one(20)	transcript_HQ_YNMLP_transcript11440/f2p0/2266	0.894427	0.0405193	{XP_010241841.1; PREDICTED: zinc finger CCCH domain-containing protein 32-like [Nelumbo nucifera]}	{sp|Q6NPN3|C3H58_ARATH; Zinc finger CCCH domain-containing protein 58 OS=Arabidopsis thaliana GN=At5g18550 PE=2 SV=1}	{nnu:104586343; - - - - -}	{At5g18550; KOG1677 CCCH-type Zn-finger protein R General function prediction only ;}	{GO:0046872; metal ion binding; molecular_function}	{XM_010243539.2; PREDICTED: Nelumbo nucifera zinc finger CCCH domain-containing protein 32-like (LOC104586343), mRNA}	{PF00642:Zinc finger C-x8-C-x5-C-x3-H type (and similar)}	20,53
4-hydroxy-6-propyl-2H-pyran-2-one(20)	transcript_HQ_HBZL_transcript10050/f2p0/2043	-0.894427	0.0405193	{XP_010246118.1; PREDICTED: B3 domain-containing protein At2g36080-like [Nelumbo nucifera]}	{sp|Q9FNI3|Y5625_ARATH; B3 domain-containing protein At5g06250 OS=Arabidopsis thaliana GN=At5g06250 PE=2 SV=1}	{nnu:104589469; - - - - -}	{NA}	{GO:0003677; DNA binding; molecular_function}	{XM_019399100.1; PREDICTED: Nicotiana attenuata B3 domain-containing protein At2g36080-like (LOC109233284), mRNA}	{PF02362:B3 DNA binding domain}	20,53
(3E)-4-[(1S,6S)-1-Hydroxy-2,2,6-trimethyl-4-oxocyclohexyl]-2-oxo-3-buten-1-yl α-L-glycero-hexopyranoside(32)	transcript_HQ_SCEZ_transcript5485/f2p0/2464	0.888523	0.043925	{XP_010252129.1; PREDICTED: two-component response regulator-like APRR1 [Nelumbo nucifera]}	{sp|Q689G9|PRR1_ORYSJ; Two-component response regulator-like PRR1 OS=Oryza sativa subsp. japonica GN=PRR1 PE=2 SV=2}	{nnu:104593812; K12127 TOC1, APRR1 pseudo-response regulator 1 - ko04712; Organismal Systems; Environmental adaptation; Circadian rhythm - plant}	{At5g61380; KOG1601 GATA-4/5/6 transcription factors K Transcription ;}	{GO:0000160; two-component signal transduction system (phosphorelay); biological_process GO:0005515; protein binding; molecular_function}	{XM_010665045.2; PREDICTED: Vitis vinifera two-component response regulator-like APRR1 (LOC100258790), transcript variant X6, mRNA}	{PF00072:Response regulator receiver domain PF06203:CCT motif}	21,32
4-hydroxy-6-propyl-2H-pyran-2-one(20)	transcript_HQ_YNMLP_transcript878/f2p0/4132	0.894427	0.0405193	{EOX96724.1; Gag-pol polyprotein, putative [Theobroma cacao]}	{sp|Q8H1P9|MB3R3_ARATH; Transcription factor MYB3R-3 OS=Arabidopsis thaliana GN=MYB3R3 PE=1 SV=1}	{pmum:107882067; - - - - -}	{At4g08100; KOG0017 FOG: Transposon-encoded proteins with TYA, reverse transcriptase, integrase domains in various combinations R General function prediction only ;}	{NA}	{AC253955.1; Aquilegia coerulea clone COL08-M12, complete sequence}	{NA}	20,53
4-hydroxy-6-propyl-2H-pyran-2-one(20)	transcript_HQ_YNMLP_transcript3193/f2p0/3282	0.894427	0.0405193	{XP_015902260.1; PREDICTED: CCAAT/enhancer-binding protein zeta [Ziziphus jujuba]}	{sp|Q03701|CEBPZ_HUMAN; CCAAT/enhancer-binding protein zeta OS=Homo sapiens GN=CEBPZ PE=1 SV=3}	{rcu:8271801; K14832 MAK21, NOC1, CEBPZ ribosome biogenesis protein MAK21 - -}	{At1g72440; KOG2038 CAATT-binding transcription factor/60S ribosomal subunit biogenesis protein JK Translation, ribosomal structure and biogenesis ; Transcription ;}	{NA}	{XM_018995417.1; PREDICTED: Juglans regia CCAAT/enhancer-binding protein zeta-like (LOC109013360), transcript variant X2, mRNA}	{NA}	20,53
(3E)-4-[(1S,6S)-1-Hydroxy-2,2,6-trimethyl-4-oxocyclohexyl]-2-oxo-3-buten-1-yl α-L-glycero-hexopyranoside(32)	transcript_HQ_SCJY_transcript7279/f2p0/2258	0.894737	0.0403431	{XP_010270167.1; PREDICTED: probable WRKY transcription factor 20 [Nelumbo nucifera]}	{sp|Q6VWJ6|WRK46_HORVU; WRKY transcription factor SUSIBA2 OS=Hordeum vulgare GN=WRKY46 PE=1 SV=1}	{nnu:104594201; - - - - -}	{NA}	{GO:0043565; sequence-specific DNA binding; molecular_function GO:0003700; sequence-specific DNA binding transcription factor activity; molecular_function GO:0006355; regulation of transcription, DNA-dependent; biological_process}	{XM_018969372.1; PREDICTED: Juglans regia probable WRKY transcription factor 20 (LOC108994223), transcript variant X3, mRNA}	{PF03106:WRKY DNA -binding domain}	21,32
4-hydroxy-6-propyl-2H-pyran-2-one(20)	transcript_HQ_YNLB_transcript6836/f2p0/2508	0.894427	0.0405193	{XP_010271843.1; PREDICTED: probable auxin efflux carrier component 1b [Nelumbo nucifera]}	{sp|Q67UL3|PIN1C_ORYSJ; Probable auxin efflux carrier component 1c OS=Oryza sativa subsp. japonica GN=PIN1C PE=2 SV=1}	{sind:105159924; K13947 PIN auxin efflux carrier family - -}	{NA}	{GO:0016021; integral to membrane; cellular_component GO:0055085; transmembrane transport; biological_process}	{KJ664291.1; Platanus occidentalis isolate PoPIN11-alp PIN-like protein mRNA, partial cds}	{PF03547:Membrane transport protein}	20,53
4-hydroxy-6-propyl-2H-pyran-2-one(20)	transcript_HQ_YNMLP_transcript17026/f2p0/1585	0.894427	0.0405193	{XP_010261496.1; PREDICTED: mitochondrial adenine nucleotide transporter ADNT1 [Nelumbo nucifera]}	{sp|O04619|ADNT1_ARATH; Mitochondrial adenine nucleotide transporter ADNT1 OS=Arabidopsis thaliana GN=ADNT1 PE=1 SV=1}	{csv:101215644; K14684 SLC25A23S solute carrier family 25 (mitochondrial phosphate transporter), member 23/24/25/41 - -}	{At4g01100; KOG0752 Mitochondrial solute carrier protein C Energy production and conversion ;}	{NA}	{XM_010263194.2; PREDICTED: Nelumbo nucifera mitochondrial adenine nucleotide transporter ADNT1 (LOC104600317), mRNA}	{NA}	20,53
(3E)-4-[(1S,6S)-1-Hydroxy-2,2,6-trimethyl-4-oxocyclohexyl]-2-oxo-3-buten-1-yl α-L-glycero-hexopyranoside(32)	transcript_HQ_SCEZ_transcript13466/f2p0/1750	0.894737	0.0403431	{XP_008226249.1; PREDICTED: UDP-glycosyltransferase TURAN isoform X1 [Prunus mume]}	{sp|Q8L7M0|TUN_ARATH; UDP-glycosyltransferase TURAN OS=Arabidopsis thaliana GN=TUN PE=2 SV=1}	{mdm:103445749; K03842 ALG1 beta-1,4-mannosyltransferase 2.4.1.142 ko00510; Metabolism; Glycan biosynthesis and metabolism; N-Glycan biosynthesis | ko00513; Metabolism; Glycan biosynthesis and metabolism; Various types of N-glycan biosynthesis}	{At1g16570; KOG2941 Beta-1,4-mannosyltransferase O Posttranslational modification, protein turnover, chaperones ;}	{NA}	{XM_008228027.2; PREDICTED: Prunus mume UDP-glycosyltransferase TURAN (LOC103325836), transcript variant X1, mRNA}	{NA}	21,32
(3E)-4-[(1S,6S)-1-Hydroxy-2,2,6-trimethyl-4-oxocyclohexyl]-2-oxo-3-buten-1-yl α-L-glycero-hexopyranoside(32)	transcript_HQ_SCJY_transcript12072/f4p0/1690	0.894737	0.0403431	{XP_010264712.1; PREDICTED: cytochrome P450 CYP82D47-like [Nelumbo nucifera]}	{sp|O49394|C82C2_ARATH; Cytochrome P450 82C2 OS=Arabidopsis thaliana GN=CYP82C2 PE=2 SV=2}	{nnu:104594945; - - - - -}	{At4g31970; KOG0156 Cytochrome P450 CYP2 subfamily Q Secondary metabolites biosynthesis, transport and catabolism ;}	{GO:0016705; oxidoreductase activity, acting on paired donors, with incorporation or reduction of molecular oxygen; molecular_function GO:0005506; iron ion binding; molecular_function GO:0055114; oxidation-reduction process; biological_process GO:0020037; heme binding; molecular_function}	{XM_008230261.1; PREDICTED: Prunus mume cytochrome P450 CYP82D47-like (LOC103327889), mRNA}	{PF00067:Cytochrome P450}	21,32
4-hydroxy-6-propyl-2H-pyran-2-one(20)	transcript_HQ_HBZL_transcript7665/f4p0/2256	-0.894427	0.0405193	{XP_010279454.1; PREDICTED: uncharacterized protein LOC104613375 isoform X1 [Nelumbo nucifera]}	{sp|Q7XKC4|Y4765_ORYSJ; Putative B3 domain-containing protein Os04g0676650 OS=Oryza sativa subsp. japonica GN=Os04g0676650 PE=3 SV=2}	{vvi:100256682; - - - - -}	{NA}	{GO:0003677; DNA binding; molecular_function}	{XM_016328224.1; PREDICTED: Arachis ipaensis B3 domain-containing transcription factor ABI3-like (LOC107625556), transcript variant X2, mRNA}	{PF02362:B3 DNA binding domain}	20,53
4-hydroxy-6-propyl-2H-pyran-2-one(20)	transcript_HQ_SCJY_transcript14018/f2p0/1493	-0.894427	0.0405193	{XP_010100109.1; Putative 12-oxophytodienoate reductase 11 [Morus notabilis]}	{sp|B9FSC8|OPR11_ORYSJ; Putative 12-oxophytodienoate reductase 11 OS=Oryza sativa subsp. japonica GN=OPR11 PE=2 SV=1}	{ini:109172038; K05894 OPR 12-oxophytodienoic acid reductase 1.3.1.42 ko00592; Metabolism; Lipid metabolism; alpha-Linolenic acid metabolism}	{At1g76690; KOG0134 NADH:flavin oxidoreductase/12-oxophytodienoate reductase CR Energy production and conversion ; General function prediction only ;}	{GO:0055114; oxidation-reduction process; biological_process GO:0016491; oxidoreductase activity; molecular_function GO:0010181; FMN binding; molecular_function}	{XM_010247222.2; PREDICTED: Nelumbo nucifera putative 12-oxophytodienoate reductase 11 (LOC104589042), mRNA}	{PF00724:NADH:flavin oxidoreductase / NADH oxidase family}	20,21
4-hydroxy-6-propyl-2H-pyran-2-one(20)	transcript_HQ_SCEZ_transcript21999/f2p0/995	0.894427	0.0405193	{XP_002272942.2; PREDICTED: short-chain dehydrogenase reductase 3b-like [Vitis vinifera]}	{sp|Q94K41|SDR3B_ARATH; Short-chain dehydrogenase reductase 3b OS=Arabidopsis thaliana GN=SDR3b PE=2 SV=1}	{gra:105795079; - - - - -}	{At2g47140; KOG0725 Reductases with broad range of substrate specificities R General function prediction only ;}	{GO:0055114; oxidation-reduction process; biological_process GO:0006694; steroid biosynthetic process; biological_process GO:0016616; oxidoreductase activity, acting on the CH-OH group of donors, NAD or NADP as acceptor; molecular_function GO:0003854; 3-beta-hydroxy-delta5-steroid dehydrogenase activity; molecular_function GO:0016491; oxidoreductase activity; molecular_function}	{XM_018120212.1; PREDICTED: Theobroma cacao short-chain dehydrogenase reductase 3b (LOC18613774), mRNA}	{PF01073:3-beta hydroxysteroid dehydrogenase/isomerase family PF03435:Saccharopine dehydrogenase NADP binding domain}	20,53
4-hydroxy-6-propyl-2H-pyran-2-one(20)	transcript_HQ_HBZL_transcript4226/f2p0/2684	-0.894427	0.0405193	{XP_010645104.1; PREDICTED: ent-kaur-16-ene synthase, chloroplastic isoform X4 [Vitis vinifera]}	{sp|Q39548|KSB_CUCMA; Ent-kaur-16-ene synthase, chloroplastic OS=Cucurbita maxima PE=1 SV=1}	{jcu:105631138; K04121 E4.2.3.19 ent-kaurene synthase 4.2.3.19 ko00904; Metabolism; Metabolism of terpenoids and polyketides; Diterpenoid biosynthesis}	{NA}	{GO:0008152; NA GO:0010333; terpene synthase activity; molecular_function GO:0016829; lyase activity; molecular_function}	{NA}	{PF01397:Terpene synthase, N-terminal domain}	20,53
4-hydroxy-6-propyl-2H-pyran-2-one(20)	transcript_HQ_SCJY_transcript13698/f2p0/1544	0.894427	0.0405193	{XP_016682920.1; PREDICTED: probable L-ascorbate peroxidase 6, chloroplastic [Gossypium hirsutum]}	{sp|Q42593|APXT_ARATH; L-ascorbate peroxidase T, chloroplastic OS=Arabidopsis thaliana GN=APXT PE=2 SV=2}	{atr:18436903; K00434 E1.11.1.11 L-ascorbate peroxidase 1.11.1.11 ko00053; Metabolism; Carbohydrate metabolism; Ascorbate and aldarate metabolism | ko00480; Metabolism; Metabolism of other amino acids; Glutathione metabolism}	{NA}	{GO:0006979; response to oxidative stress; biological_process GO:0055114; oxidation-reduction process; biological_process GO:0004601; peroxidase activity; molecular_function GO:0020037; heme binding; molecular_function}	{XM_003523386.3; PREDICTED: Glycine max probable L-ascorbate peroxidase 6, chloroplastic (LOC100802238), transcript variant X2, mRNA}	{PF00141:Peroxidase}	20,53
4-hydroxy-6-propyl-2H-pyran-2-one(20)	transcript_HQ_YNMLP_transcript2366/f5p0/3497	0.894427	0.0405193	{XP_010267183.1; PREDICTED: homeobox-leucine zipper protein ATHB-15-like [Nelumbo nucifera]}	{sp|Q9ZU11|ATB15_ARATH; Homeobox-leucine zipper protein ATHB-15 OS=Arabidopsis thaliana GN=ATHB-15 PE=1 SV=1}	{jcu:105631553; K09338 HD-ZIP homeobox-leucine zipper protein - -}	{NA}	{GO:0008289; lipid binding; molecular_function GO:0043565; sequence-specific DNA binding; molecular_function GO:0003700; sequence-specific DNA binding transcription factor activity; molecular_function GO:0003677; DNA binding; molecular_function GO:0006355; regulation of transcription, DNA-dependent; biological_process GO:0003779; actin binding; molecular_function}	{XM_002283967.3; PREDICTED: Vitis vinifera homeobox-leucine zipper protein ATHB-15 (LOC100260057), mRNA}	{PF01852:START domain PF00046:Homeobox domain PF00170:bZIP transcription factor PF07765:KIP1-like protein}	20,53
4-hydroxy-6-propyl-2H-pyran-2-one(20)	transcript_HQ_HBZL_transcript6996/f7p0/2338	-0.894427	0.0405193	{XP_010264039.1; PREDICTED: sterol 3-beta-glucosyltransferase UGT80A2-like isoform X1 [Nelumbo nucifera]}	{sp|Q9M8Z7|U80A2_ARATH; Sterol 3-beta-glucosyltransferase UGT80A2 OS=Arabidopsis thaliana GN=UGT80A2 PE=1 SV=1}	{pper:PRUPE_ppa002976mg; K05841 E2.4.1.173 sterol 3beta-glucosyltransferase 2.4.1.173 -}	{At3g07020; KOG1192 UDP-glucuronosyl and UDP-glucosyl transferase GC Carbohydrate transport and metabolism ; Energy production and conversion ;}	{GO:0030259; lipid glycosylation; biological_process GO:0005975; carbohydrate metabolic process; biological_process GO:0016758; transferase activity, transferring hexosyl groups; molecular_function GO:0008152; NA}	{XM_010265737.2; PREDICTED: Nelumbo nucifera sterol 3-beta-glucosyltransferase UGT80A2-like (LOC104602150), transcript variant X1, mRNA}	{PF03033:Glycosyltransferase family 28 N-terminal domain PF00201:UDP-glucoronosyl and UDP-glucosyl transferase}	20,53
4-hydroxy-6-propyl-2H-pyran-2-one(20)	transcript_HQ_HBZL_transcript20553/f3p0/1196	-0.894427	0.0405193	{XP_019457856.1; PREDICTED: LEAF RUST 10 DISEASE-RESISTANCE LOCUS RECEPTOR-LIKE PROTEIN KINASE-like 1.2 [Lupinus angustifolius]}	{NA}	{lang:109358210; - - - - -; lang:109358210; - - - - -}	{NA}	{GO:0030247; polysaccharide binding; molecular_function}	{NA}	{PF13947:Wall-associated receptor kinase galacturonan-binding}	20,53
4-hydroxy-6-propyl-2H-pyran-2-one(20)	transcript_HQ_HBZL_transcript10876/f2p0/1976	-0.894427	0.0405193	{XP_010243432.2; PREDICTED: major facilitator superfamily domain-containing protein 12-like [Nelumbo nucifera]}	{sp|Q6NUT3|MFS12_HUMAN; Major facilitator superfamily domain-containing protein 12 OS=Homo sapiens GN=MFSD12 PE=1 SV=2}	{vvi:100259681; - - - - -}	{At3g60070; KOG4830 Predicted sugar transporter G Carbohydrate transport and metabolism ;}	{NA}	{XM_017364273.1; PREDICTED: Daucus carota subsp. sativus major facilitator superfamily domain-containing protein 12-like (LOC108196826), mRNA}	{NA}	20,53
(3E)-4-[(1S,6S)-1-Hydroxy-2,2,6-trimethyl-4-oxocyclohexyl]-2-oxo-3-buten-1-yl α-L-glycero-hexopyranoside(32)	transcript_HQ_HBZL_transcript10317/f3p0/2026	-0.892218	0.0417836	{CBI35175.3; unnamed protein product, partial [Vitis vinifera]}	{sp|Q93WU6|WRK74_ARATH; Probable WRKY transcription factor 74 OS=Arabidopsis thaliana GN=WRKY74 PE=2 SV=2}	{pop:POPTR_0002s04440g; - - - - -}	{NA}	{GO:0005634; nucleus; cellular_component GO:0006355; regulation of transcription, DNA-dependent; biological_process GO:0046660; female sex differentiation; biological_process GO:0043565; sequence-specific DNA binding; molecular_function GO:0006397; mRNA processing; biological_process GO:0003700; sequence-specific DNA binding transcription factor activity; molecular_function}	{XM_007199137.1; Prunus persica hypothetical protein (PRUPE_ppa021657mg) mRNA, partial cds}	{PF06495:Fruit fly transformer protein PF03106:WRKY DNA -binding domain}	21,32
4-hydroxy-6-propyl-2H-pyran-2-one(20)	transcript_HQ_HBZL_transcript19994/f14p0/1246	-0.894427	0.0405193	{XP_010267155.1; PREDICTED: 2-oxoglutarate-Fe(II) type oxidoreductase-like isoform X2 [Nelumbo nucifera]}	{sp|Q4W946|ENCD_ASPFU; 2-oxoglutarate-Fe(II) type oxidoreductase OS=Neosartorya fumigata (strain ATCC MYA-4609 / Af293 / CBS 101355 / FGSC A1100) GN=encD PE=1 SV=2}	{vvi:100244088; - - - - -}	{At1g35190; KOG0143 Iron/ascorbate family oxidoreductases QR Secondary metabolites biosynthesis, transport and catabolism ; General function prediction only ;}	{GO:0055114; oxidation-reduction process; biological_process GO:0016491; oxidoreductase activity; molecular_function}	{XM_010268853.2; PREDICTED: Nelumbo nucifera 2-oxoglutarate-Fe(II) type oxidoreductase-like (LOC104604496), transcript variant X2, mRNA}	{PF03171:2OG-Fe(II) oxygenase superfamily}	20,53
4-hydroxy-6-propyl-2H-pyran-2-one(20)	transcript_HQ_HBZL_transcript13073/f7p0/1817	-0.894427	0.0405193	{XP_010246322.1; PREDICTED: transcription factor UNE12-like isoform X4 [Nelumbo nucifera]}	{sp|O22768|UNE12_ARATH; Transcription factor UNE12 OS=Arabidopsis thaliana GN=UNE12 PE=2 SV=2}	{rcu:8269334; - - - - -}	{NA}	{GO:0030955; potassium ion binding; molecular_function GO:0005741; mitochondrial outer membrane; cellular_component GO:0046983; protein dimerization activity; molecular_function GO:0006886; intracellular protein transport; biological_process GO:0005249; voltage-gated potassium channel activity; molecular_function GO:0006813; potassium ion transport; biological_process GO:0016021; integral to memb…	{XM_010248020.2; PREDICTED: Nelumbo nucifera transcription factor UNE12-like (LOC104589640), transcript variant X4, mRNA}	{PF07941:Potassium channel Kv1.4 tandem inactivation domain PF00010:Helix-loop-helix DNA-binding domain PF04281:Mitochondrial import receptor subunit Tom22 }	20,53
floralquinquenoside A(14)	transcript_HQ_HBZL_transcript22313/f10p0/1025	1	0	{XP_008465422.1; PREDICTED: superoxide dismutase [Cu-Zn], chloroplastic [Cucumis melo]}	{sp|O04997|SODCP_SOLCS; Superoxide dismutase [Cu-Zn], chloroplastic OS=Solidago canadensis var. scabra GN=SODCP PE=2 SV=1}	{pxb:103947719; K04565 SOD1 superoxide dismutase, Cu-Zn family 1.15.1.1 ko04146; Cellular Processes; Transport and catabolism; Peroxisome | ko04213; Organismal Systems; Aging; Longevity regulating pathway - multiple species | ko05014; Human Diseases; Neurodegenerative diseases; Amyotrophic lateral sclerosis (ALS) | ko05016; Human Diseases; Neurodegenerative diseases; Huntington's disease | ko0502…	{At2g28190; KOG0441 Cu2+/Zn2+ superoxide dismutase SOD1 P Inorganic ion transport and metabolism ;}	{GO:0046872; metal ion binding; molecular_function GO:0006801; superoxide metabolic process; biological_process GO:0055114; oxidation-reduction process; biological_process}	{JQ043347.1; Vicia faba cultivar Yuxidabaidou superoxide dismutase (SOD) mRNA, complete cds}	{PF00080:Copper/zinc superoxide dismutase (SODC)}	57,58,60,61,63,64	E
floralquinquenoside A(14)	transcript_HQ_HBZL_transcript26414/f2p0/572	1	0	{AAM67282.1; water stress-induced protein, putative [Arabidopsis thaliana]}	{sp|Q9SLJ2|HRD11_ARATH; Dehydrin HIRD11 OS=Arabidopsis thaliana GN=HIRD11 PE=1 SV=1}	{ath:AT1G54410; - - - - -}	{NA}	{GO:0006950; response to stress; biological_process GO:0009415; response to water; biological_process}	{NA}	{PF00257:Dehydrin}	57,58,60,61,63,64
floralquinquenoside A(14)	transcript_HQ_HBZL_transcript20802/f6p0/1168	1	0	{XP_019054622.1; PREDICTED: endochitinase EP3-like [Nelumbo nucifera]}	{sp|Q9M2U5|CHI5_ARATH; Endochitinase EP3 OS=Arabidopsis thaliana GN=EP3 PE=1 SV=1}	{pmum:103322428; K01183 E3.2.1.14 chitinase 3.2.1.14 ko00520; Metabolism; Carbohydrate metabolism; Amino sugar and nucleotide sugar metabolism}	{At3g54420; KOG4742 Predicted chitinase R General function prediction only ;}	{GO:0008061; chitin binding; molecular_function GO:0006032; chitin catabolic process; biological_process GO:0016998; cell wall macromolecule catabolic process; biological_process GO:0004568; chitinase activity; molecular_function}	{BT137332.1; Lotus japonicus clone JCVI-FLLj-12E8 unknown mRNA}	{PF00187:Chitin recognition protein PF00182:Chitinase class I}	57,58,60,61,63,64
floralquinquenoside A(14)	transcript_HQ_HBZL_transcript9331/f2p0/2112	1	0	{XP_010261147.1; PREDICTED: transcription factor TGA1-like isoform X2 [Nelumbo nucifera]}	{sp|Q39237|TGA1_ARATH; Transcription factor TGA1 OS=Arabidopsis thaliana GN=TGA1 PE=1 SV=2}	{pper:PRUPE_ppa007578mg; K14431 TGA transcription factor TGA - ko04075; Environmental Information Processing; Signal transduction; Plant hormone signal transduction}	{NA}	{GO:0005198; NA GO:0006351; transcription, DNA-dependent; biological_process GO:0006355; regulation of transcription, DNA-dependent; biological_process GO:0043565; sequence-specific DNA binding; molecular_function GO:0019031; viral envelope; cellular_component GO:0005634; nucleus; cellular_component GO:0003677; DNA binding; molecular_function GO:0003700; sequence-specific DNA binding transcriptio…	{XM_010941296.2; PREDICTED: Elaeis guineensis transcription factor TGA1-like (LOC105058377), transcript variant X4, mRNA}	{PF07716:Basic region leucine zipper PF14144:Seed dormancy control PF04513:Baculovirus polyhedron envelope protein, PEP, C terminus PF00170:bZIP transcription factor PF03131:bZIP Maf transcription factor}	57,58,60,61,63,64
floralquinquenoside A(14)	transcript_HQ_HBZL_transcript17007/f7p0/1528	1	0	{XP_019053420.1; PREDICTED: dof zinc finger protein DOF5.4 [Nelumbo nucifera]}	{sp|Q8LDR0|DOF54_ARATH; Dof zinc finger protein DOF5.4 OS=Arabidopsis thaliana GN=DOF5.4 PE=2 SV=2}	{nnu:109114745; - - - - -}	{NA}	{GO:0003677; DNA binding; molecular_function GO:0006355; regulation of transcription, DNA-dependent; biological_process}	{LT669795.1; Arabis alpina genome assembly, chromosome: chr8}	{PF02701:Dof domain, zinc finger}	57,58,60,61,63,64
floralquinquenoside A(14)	transcript_HQ_HBZL_transcript1692/f2p0/3411	1	0	{XP_010270053.1; PREDICTED: zinc finger CCCH domain-containing protein 12 isoform X1 [Nelumbo nucifera]}	{sp|Q2R4J4|C3H63_ORYSJ; Zinc finger CCCH domain-containing protein 63 OS=Oryza sativa subsp. japonica GN=Os11g0472000 PE=2 SV=2}	{nnu:104594120; - - - - -}	{At2g47850; KOG1677 CCCH-type Zn-finger protein R General function prediction only ;}	{GO:0046872; metal ion binding; molecular_function}	{XM_010271752.2; PREDICTED: Nelumbo nucifera zinc finger CCCH domain-containing protein 12 (LOC104606509), transcript variant X2, mRNA}	{PF00642:Zinc finger C-x8-C-x5-C-x3-H type (and similar)}	57,58,60,61,63,64
floralquinquenoside A(14)	transcript_HQ_HBZL_transcript11245/f2p0/1938	1	0	{XP_010263644.1; PREDICTED: sugar transporter ERD6-like 6 [Nelumbo nucifera]}	{sp|Q93YP9|ERDL4_ARATH; Sugar transporter ERD6-like 4 OS=Arabidopsis thaliana GN=At1g19450 PE=2 SV=1}	{nnu:104595672; K08145 SLC2A8, GLUT8 MFS transporter, SP family, solute carrier family 2 (facilitated glucose transporter), member 8 - -}	{At1g19450; KOG0254 Predicted transporter (major facilitator superfamily) R General function prediction only ;}	{GO:0016021; integral to membrane; cellular_component GO:0055085; transmembrane transport; biological_process GO:0022857; transmembrane transporter activity; molecular_function}	{XM_016867579.1; PREDICTED: Gossypium hirsutum sugar transporter ERD6-like 6 (LOC107935043), transcript variant X2, mRNA}	{PF07690:Major Facilitator Superfamily PF00083:Sugar (and other) transporter}	57,58,60,61,63,64
floralquinquenoside A(14)	transcript_HQ_HBZL_transcript1782/f2p0/3350	1	0	{XP_010255722.1; PREDICTED: uncharacterized protein LOC104596335 isoform X1 [Nelumbo nucifera]}	{sp|Q9F234|AGL2_BACTQ; Alpha-glucosidase 2 OS=Bacillus thermoamyloliquefaciens PE=3 SV=1}	{nnu:104596335; - - - - -}	{At3g23640; KOG1066 Glucosidase II catalytic (alpha) subunit and related enzymes, glycosyl hydrolase family 31 GMO Carbohydrate transport and metabolism ; Cell wall/membrane/envelope biogenesis ; Posttranslational modification, protein turnover, chaperones ;}	{GO:0004553; hydrolase activity, hydrolyzing O-glycosyl compounds; molecular_function GO:0005975; carbohydrate metabolic process; biological_process}	{XM_010257420.2; PREDICTED: Nelumbo nucifera alpha-glucosidase 2 (LOC104596335), transcript variant X1, mRNA}	{PF01055:Glycosyl hydrolases family 31 }	57,58,60,61,63,64
floralquinquenoside A(14)	transcript_HQ_HBZL_transcript8314/f3p0/2206	1	0	{CCO62223.1; putative cytochrome P450 monooxygenase [Actaea racemosa]}	{sp|P24465|C71A1_PERAE; Cytochrome P450 71A1 OS=Persea americana GN=CYP71A1 PE=1 SV=2}	{sind:105157300; K07418 CYP2J cytochrome P450 family 2 subfamily J 1.14.14.1 ko00590; Metabolism; Lipid metabolism; Arachidonic acid metabolism | ko00591; Metabolism; Lipid metabolism; Linoleic acid metabolism | ko04913; Organismal Systems; Endocrine system; Ovarian steroidogenesis | ko04726; Organismal Systems; Nervous system; Serotonergic synapse | ko04750; Organismal Systems; Sensory system; I…	{At2g30750; KOG0156 Cytochrome P450 CYP2 subfamily Q Secondary metabolites biosynthesis, transport and catabolism ;}	{GO:0016705; oxidoreductase activity, acting on paired donors, with incorporation or reduction of molecular oxygen; molecular_function GO:0055114; oxidation-reduction process; biological_process GO:0020037; heme binding; molecular_function GO:0005506; iron ion binding; molecular_function}	{XM_015716165.1; PREDICTED: Ricinus communis uncharacterized LOC8272138 (LOC8272138), mRNA}	{PF00067:Cytochrome P450}	57,58,60,61,63,64
floralquinquenoside A(14)	transcript_HQ_HBZL_transcript17054/f2p0/1540	1	0	{XP_002277534.2; PREDICTED: protein DETOXIFICATION 49 [Vitis vinifera]}	{NA}	{rcu:8262883; K03327 TC.MATE, SLC47A, norM, mdtK, dinF multidrug resistance protein, MATE family - -}	{NA}	{GO:0016020; membrane; cellular_component GO:0015238; drug transmembrane transporter activity; molecular_function GO:0015297; antiporter activity; molecular_function GO:0006855; drug transmembrane transport; biological_process GO:0055085; transmembrane transport; biological_process}	{NA}	{PF01554:MatE}	57,58,60,61,63,64
floralquinquenoside A(14)	transcript_HQ_HBZL_transcript13587/f8p0/1793	1	0	{XP_019151034.1; PREDICTED: probable sugar phosphate/phosphate translocator At3g11320 [Ipomoea nil]}	{sp|Q6DBP3|PT505_ARATH; Probable sugar phosphate/phosphate translocator At5g05820 OS=Arabidopsis thaliana GN=At5g05820 PE=2 SV=1}	{vvi:100241014; - - - - -}	{At5g05820; KOG1441 Glucose-6-phosphate/phosphate and phosphoenolpyruvate/phosphate antiporter GE Carbohydrate transport and metabolism ; Amino acid transport and metabolism ;}	{GO:0016020; membrane; cellular_component GO:0016021; integral to membrane; cellular_component GO:0055085; transmembrane transport; biological_process}	{XM_010258417.2; PREDICTED: Nelumbo nucifera probable sugar phosphate/phosphate translocator At3g11320 (LOC104597030), mRNA}	{PF08449:UAA transporter family PF00892:EamA-like transporter family}	57,58,60,61,63,64
floralquinquenoside A(14)	transcript_HQ_HBZL_transcript12079/f3p0/1879	1	0	{JAT60244.1; MATE efflux family protein 7 [Anthurium amnicola]}	{sp|Q9FHB6|DTX16_ARATH; Protein DETOXIFICATION 16 OS=Arabidopsis thaliana GN=DTX16 PE=2 SV=1}	{nnu:104593578; K03327 TC.MATE, SLC47A, norM, mdtK, dinF multidrug resistance protein, MATE family - -}	{At5g52450; KOG1347 Uncharacterized membrane protein, predicted efflux pump R General function prediction only ;}	{GO:0006855; drug transmembrane transport; biological_process GO:0055085; transmembrane transport; biological_process GO:0015297; antiporter activity; molecular_function GO:0015238; drug transmembrane transporter activity; molecular_function GO:0016020; membrane; cellular_component}	{XM_011040790.1; PREDICTED: Populus euphratica MATE efflux family protein 5 (LOC105135763), transcript variant X1, mRNA}	{PF01554:MatE}	57,58,60,61,63,64
floralquinquenoside A(14)	transcript_HQ_HBZL_transcript7388/f4p0/2238	1	0	{XP_010241494.1; PREDICTED: CMP-sialic acid transporter 2-like [Nelumbo nucifera]}	{sp|Q8GY97|CSTR2_ARATH; CMP-sialic acid transporter 2 OS=Arabidopsis thaliana GN=At2g43240 PE=2 SV=1}	{nnu:104598294; - - - - -}	{At3g59360; KOG2234 Predicted UDP-galactose transporter G Carbohydrate transport and metabolism ;}	{GO:0016020; membrane; cellular_component GO:0005351; sugar:hydrogen symporter activity; molecular_function GO:0016021; integral to membrane; cellular_component GO:0008643; carbohydrate transport; biological_process GO:0000139; Golgi membrane; cellular_component}	{XM_018121517.1; PREDICTED: Theobroma cacao CMP-sialic acid transporter 2 (LOC18597413), mRNA}	{PF00892:EamA-like transporter family PF04142:Nucleotide-sugar transporter}	57,58,60,61,63,64
floralquinquenoside A(14)	transcript_HQ_HBZL_transcript18081/f9p0/1447	1	0	{XP_010278594.1; PREDICTED: heat stress transcription factor B-2b-like [Nelumbo nucifera]}	{sp|Q6Z9C8|HFB2B_ORYSJ; Heat stress transcription factor B-2b OS=Oryza sativa subsp. japonica GN=HSFB2B PE=2 SV=1}	{nnu:104596145; K09419 HSFF heat shock transcription factor, other eukaryote - -}	{At4g11660; KOG0627 Heat shock transcription factor K Transcription ;}	{GO:0006260; DNA replication; biological_process GO:0006355; regulation of transcription, DNA-dependent; biological_process GO:0043565; sequence-specific DNA binding; molecular_function GO:0003700; sequence-specific DNA binding transcription factor activity; molecular_function GO:0005634; nucleus; cellular_component}	{XM_010280292.2; PREDICTED: Nelumbo nucifera heat stress transcription factor B-2b-like (LOC104612735), mRNA}	{PF07716:Basic region leucine zipper PF02344:Myc leucine zipper domain PF06156:Protein of unknown function (DUF972) PF00447:HSF-type DNA-binding PF01166:TSC-22/dip/bun family}	57,58,60,61,63,64
floralquinquenoside A(14)	transcript_HQ_HBZL_transcript25054/f2p0/709	1	0	{XP_008791855.1; PREDICTED: universal stress protein PHOS32 [Phoenix dactylifera]}	{sp|Q8L4N1|PHO34_ARATH; Universal stress protein PHOS34 OS=Arabidopsis thaliana GN=PHOS34 PE=1 SV=1}	{pda:103708617; - - - - -}	{NA}	{GO:0006950; response to stress; biological_process}	{NA}	{PF00582:Universal stress protein family}	57,58,60,61,63,64
floralquinquenoside A(14)	transcript_HQ_HBZL_transcript3691/f2p0/2795	1	0	{XP_010277558.1; PREDICTED: ent-copalyl diphosphate synthase, chloroplastic-like [Nelumbo nucifera]}	{sp|O04408|KSA_PEA; Ent-copalyl diphosphate synthase, chloroplastic OS=Pisum sativum PE=2 SV=1}	{nnu:104611948; K04120 E5.5.1.13 ent-copalyl diphosphate synthase 5.5.1.13 ko00904; Metabolism; Metabolism of terpenoids and polyketides; Diterpenoid biosynthesis}	{NA}	{GO:0010333; terpene synthase activity; molecular_function GO:0000287; magnesium ion binding; molecular_function GO:0016829; lyase activity; molecular_function GO:0008152; NA}	{GU045757.1; Picea sitchensis clone pHS090624-11 ent-copalyl diphosphate synthase (CPS) mRNA, complete cds}	{PF01397:Terpene synthase, N-terminal domain PF03936:Terpene synthase family, metal binding domain}	57,58,60,61,63,64
floralquinquenoside A(14)	transcript_HQ_HBZL_transcript16707/f30p0/1545	1	0	{XP_010266466.1; PREDICTED: probable WRKY transcription factor 41 [Nelumbo nucifera]}	{sp|Q9SUP6|WRK53_ARATH; Probable WRKY transcription factor 53 OS=Arabidopsis thaliana GN=WRKY53 PE=1 SV=1}	{gra:105791359; - - - - -}	{NA}	{GO:0003700; sequence-specific DNA binding transcription factor activity; molecular_function GO:0006355; regulation of transcription, DNA-dependent; biological_process GO:0043565; sequence-specific DNA binding; molecular_function}	{KC615361.1; Chrysanthemum x morifolium WRKY7 mRNA, complete cds}	{PF03106:WRKY DNA -binding domain}	57,58,60,61,63,64
floralquinquenoside A(14)	transcript_HQ_HBZL_transcript17573/f5p0/1505	1	0	{XP_006435345.1; hypothetical protein CICLE_v10001106mg [Citrus clementina]}	{sp|Q70PR7|VINSY_RAUSE; Vinorine synthase OS=Rauvolfia serpentina GN=ACT PE=1 SV=2}	{cic:CICLE_v10001106mg; - - - - -}	{NA}	{GO:0016747; transferase activity, transferring acyl groups other than amino-acyl groups; molecular_function}	{NA}	{PF02458:Transferase family}	57,58,60,61,63,64
floralquinquenoside A(14)	transcript_HQ_HBZL_transcript13006/f2p0/1828	1	0	{AJD20226.1; putative N-methylcoclaurine 3-hydroxylase [Podophyllum peltatum]}	{sp|P37122|C76A2_SOLME; Cytochrome P450 76A2 OS=Solanum melongena GN=CYP76A2 PE=2 SV=1}	{nta:107775167; - - - - -}	{At3g52970; KOG0156 Cytochrome P450 CYP2 subfamily Q Secondary metabolites biosynthesis, transport and catabolism ;}	{GO:0016705; oxidoreductase activity, acting on paired donors, with incorporation or reduction of molecular oxygen; molecular_function GO:0055114; oxidation-reduction process; biological_process GO:0005506; iron ion binding; molecular_function GO:0020037; heme binding; molecular_function}	{NA}	{PF00067:Cytochrome P450}	57,58,60,61,63,64
floralquinquenoside A(14)	transcript_HQ_HBZL_transcript12203/f5p0/1891	1	0	{XP_010266466.1; PREDICTED: probable WRKY transcription factor 41 [Nelumbo nucifera]}	{sp|Q9SUP6|WRK53_ARATH; Probable WRKY transcription factor 53 OS=Arabidopsis thaliana GN=WRKY53 PE=1 SV=1}	{pda:103702950; - - - - -}	{NA}	{GO:0043565; sequence-specific DNA binding; molecular_function GO:0006355; regulation of transcription, DNA-dependent; biological_process GO:0003700; sequence-specific DNA binding transcription factor activity; molecular_function}	{KC615361.1; Chrysanthemum x morifolium WRKY7 mRNA, complete cds}	{PF03106:WRKY DNA -binding domain}	57,58,60,61,63,64
floralquinquenoside A(14)	transcript_HQ_HBZL_transcript4131/f15p0/2822	1	0	{XP_010242396.1; PREDICTED: transcription factor bHLH13-like [Nelumbo nucifera]}	{sp|Q9ZPY8|AIB_ARATH; Transcription factor ABA-INDUCIBLE bHLH-TYPE OS=Arabidopsis thaliana GN=AIB PE=2 SV=2}	{nnu:104597078; - - - - -}	{NA}	{GO:0046983; protein dimerization activity; molecular_function}	{XM_006491230.2; PREDICTED: Citrus sinensis transcription factor bHLH13 (LOC102626453), mRNA}	{PF00010:Helix-loop-helix DNA-binding domain}	57,58,60,61,63,64
floralquinquenoside A(14)	transcript_HQ_HBZL_transcript16541/f2p0/1567	1	0	{XP_007042481.2; PREDICTED: scopoletin glucosyltransferase [Theobroma cacao]}	{sp|Q9AT54|SCGT_TOBAC; Scopoletin glucosyltransferase OS=Nicotiana tabacum GN=TOGT1 PE=1 SV=1}	{cic:CICLE_v10028305mg; - - - - -}	{At4g34131; KOG1192 UDP-glucuronosyl and UDP-glucosyl transferase GC Carbohydrate transport and metabolism ; Energy production and conversion ;}	{GO:0008152; NA GO:0016758; transferase activity, transferring hexosyl groups; molecular_function}	{NA}	{PF00201:UDP-glucoronosyl and UDP-glucosyl transferase}	57,58,60,61,63,64
floralquinquenoside A(14)	transcript_HQ_HBZL_transcript16145/f3p0/1616	1	0	{XP_010275766.1; PREDICTED: transcription factor bHLH66 [Nelumbo nucifera]}	{sp|Q9ZUG9|BH066_ARATH; Transcription factor bHLH66 OS=Arabidopsis thaliana GN=BHLH66 PE=2 SV=1}	{vvi:100243222; - - - - -}	{NA}	{GO:0046983; protein dimerization activity; molecular_function}	{XM_012216092.1; PREDICTED: Jatropha curcas transcription factor bHLH66-like (LOC105633497), mRNA}	{PF00010:Helix-loop-helix DNA-binding domain}	57,58,60,61,63,64
floralquinquenoside A(14)	transcript_HQ_HBZL_transcript56/f3p0/6403	1	0	{EOX94682.1; Kinase interacting (KIP1-like) family protein, putative [Theobroma cacao]}	{sp|Q9LUI2|NET1A_ARATH; Protein NETWORKED 1A OS=Arabidopsis thaliana GN=NET1A PE=1 SV=1}	{nnu:104598647; - - - - -}	{NA}	{GO:0006355; regulation of transcription, DNA-dependent; biological_process GO:0043565; sequence-specific DNA binding; molecular_function GO:0003700; sequence-specific DNA binding transcription factor activity; molecular_function GO:0003779; actin binding; molecular_function}	{XM_012214296.1; PREDICTED: Jatropha curcas protein NETWORKED 1A (LOC105632027), mRNA}	{PF00170:bZIP transcription factor PF07765:KIP1-like protein}	57,58,60,61,63,64
floralquinquenoside A(14)	transcript_HQ_HBZL_transcript25950/f4p0/620	1	0	{XP_010454524.1; PREDICTED: thionin-like [Camelina sativa]}	{sp|Q9SBK8|THN_BRARP; Thionin OS=Brassica rapa subsp. pekinensis GN=THI2 PE=2 SV=1}	{crb:CARUB_v10005712mg; - - - - -}	{NA}	{GO:0006952; defense response; biological_process}	{NA}	{PF00321:Plant thionin}	57,58,60,61,63,64
floralquinquenoside A(14)	transcript_HQ_HBZL_transcript12568/f5p0/1849	1	0	{XP_010276000.1; PREDICTED: glucose-6-phosphate/phosphate translocator 2, chloroplastic-like [Nelumbo nucifera]}	{sp|Q94B38|GPT2_ARATH; Glucose-6-phosphate/phosphate translocator 2, chloroplastic OS=Arabidopsis thaliana GN=GPT2 PE=2 SV=2}	{csv:101216838; K15283 SLC35E1 solute carrier family 35, member E1 - -}	{At1g61800; KOG1441 Glucose-6-phosphate/phosphate and phosphoenolpyruvate/phosphate antiporter GE Carbohydrate transport and metabolism ; Amino acid transport and metabolism ;}	{GO:0016020; membrane; cellular_component GO:0055085; transmembrane transport; biological_process GO:0016021; integral to membrane; cellular_component}	{XM_006449009.1; Citrus clementina hypothetical protein (CICLE_v10015210mg) mRNA, complete cds}	{PF08449:UAA transporter family PF00892:EamA-like transporter family}	57,58,60,61,63,64
floralquinquenoside A(14)	transcript_HQ_HBZL_transcript12704/f4p0/1836	1	0	{XP_010260299.1; PREDICTED: ethylene-responsive transcription factor 4-like [Nelumbo nucifera]}	{sp|Q9FE67|ERF80_ARATH; Ethylene-responsive transcription factor 9 OS=Arabidopsis thaliana GN=ERF9 PE=2 SV=1}	{nnu:104599451; K09286 EREBP EREBP-like factor - -}	{NA}	{GO:0006355; regulation of transcription, DNA-dependent; biological_process GO:0003700; sequence-specific DNA binding transcription factor activity; molecular_function}	{XM_012601037.1; PREDICTED: Gossypium raimondii ethylene-responsive transcription factor 4-like (LOC105777673), mRNA}	{PF00847:AP2 domain}	57,58,60,61,63,64
floralquinquenoside A(14)	transcript_HQ_HBZL_transcript4912/f2p0/2610	1	0	{CAJ44461.1; sialyltransferase like protein [Aquilegia formosa x Aquilegia pubescens]}	{sp|Q8VZJ0|SIA1_ARATH; Sialyltransferase-like protein 1 OS=Arabidopsis thaliana GN=SIA1 PE=2 SV=1}	{nnu:104591853; - - - - -}	{At1g08660; KOG2692 Sialyltransferase G Carbohydrate transport and metabolism ;}	{GO:0006486; protein glycosylation; biological_process GO:0008373; sialyltransferase activity; molecular_function}	{AM167923.1; Aquilegia formosa x Aquilegia pubescens mRNA for sialyltransferase like protein (stv3 gene)}	{PF00777:Glycosyltransferase family 29 (sialyltransferase)}	57,58,60,61,63,64
floralquinquenoside A(14)	transcript_HQ_HBZL_transcript1986/f2p0/3216	1	0	{XP_010243154.1; PREDICTED: glycosyltransferase family protein 64 protein C5-like isoform X1 [Nelumbo nucifera]}	{sp|Q84WB7|GT645_ARATH; Glycosyltransferase family protein 64 protein C5 OS=Arabidopsis thaliana GN=At5g04500 PE=2 SV=1}	{nnu:104587301; - - - - -}	{At5g04500; KOG1022 Acetylglucosaminyltransferase EXT2/exostosin 2 GMW Carbohydrate transport and metabolism ; Cell wall/membrane/envelope biogenesis ; Extracellular structures ;}	{GO:0004553; hydrolase activity, hydrolyzing O-glycosyl compounds; molecular_function GO:0015012; heparan sulfate proteoglycan biosynthetic process; biological_process GO:0016021; integral to membrane; cellular_component GO:0005975; carbohydrate metabolic process; biological_process GO:0006024; glycosaminoglycan biosynthetic process; biological_process}	{XM_010279976.2; PREDICTED: Nelumbo nucifera glycosyltransferase family protein 64 protein C5-like (LOC104612533), mRNA}	{PF04616:Glycosyl hydrolases family 43 PF09258:Glycosyl transferase family 64 domain}	57,58,60,61,63,64
floralquinquenoside A(14)	transcript_LQ_HBZL_transcript12156/f2p0/1963	1	0	{XP_015584598.1; PREDICTED: cytochrome P450 87A3 [Ricinus communis]}	{sp|Q7XU38|C87A3_ORYSJ; Cytochrome P450 87A3 OS=Oryza sativa subsp. japonica GN=CYP87A3 PE=2 SV=3}	{atr:18447731; - - - - -}	{At1g12740; KOG0157 Cytochrome P450 CYP4/CYP19/CYP26 subfamilies QI Secondary metabolites biosynthesis, transport and catabolism ; Lipid transport and metabolism ;}	{GO:0005506; iron ion binding; molecular_function GO:0020037; heme binding; molecular_function GO:0055114; oxidation-reduction process; biological_process GO:0016705; oxidoreductase activity, acting on paired donors, with incorporation or reduction of molecular oxygen; molecular_function}	{NA}	{PF00067:Cytochrome P450}	57,58,60,61,63,64
floralquinquenoside A(14)	transcript_HQ_HBZL_transcript19276/f5p0/1350	1	0	{XP_010262018.1; PREDICTED: uncharacterized protein LOC104600645 [Nelumbo nucifera]}	{NA}	{nnu:104600645; - - - - -}	{NA}	{GO:0009405; pathogenesis; biological_process}	{NA}	{PF05431:Insecticidal Crystal Toxin, P42 }	57,58,60,61,63,64
floralquinquenoside A(14)	transcript_HQ_HBZL_transcript14540/f7p0/1715	1	0	{XP_017975350.1; PREDICTED: cytochrome P450 94B3 [Theobroma cacao]}	{sp|Q9SMP5|C94B3_ARATH; Cytochrome P450 94B3 OS=Arabidopsis thaliana GN=CYP94B3 PE=2 SV=1}	{jcu:105634463; K20665 CYP94B jasmonoyl-isoleucine 12-hydroxylase 1.14.-.- -}	{At3g48520; KOG0157 Cytochrome P450 CYP4/CYP19/CYP26 subfamilies QI Secondary metabolites biosynthesis, transport and catabolism ; Lipid transport and metabolism ;}	{GO:0005506; iron ion binding; molecular_function GO:0020037; heme binding; molecular_function GO:0016705; oxidoreductase activity, acting on paired donors, with incorporation or reduction of molecular oxygen; molecular_function GO:0055114; oxidation-reduction process; biological_process}	{XM_004502081.2; PREDICTED: Cicer arietinum cytochrome P450 94B3-like (LOC101511677), mRNA}	{PF00067:Cytochrome P450}	57,58,60,61,63,64
floralquinquenoside A(14)	transcript_HQ_HBZL_transcript13475/f2p0/1823	1	0	{XP_006856348.2; PREDICTED: cytochrome P450 734A1 [Amborella trichopoda]}	{sp|O48786|C734A_ARATH; Cytochrome P450 734A1 OS=Arabidopsis thaliana GN=CYP734A1 PE=2 SV=1}	{atr:18446161; K15639 CYP734A1, BAS1 PHYB activation tagged suppressor 1 1.14.-.- ko00905; Metabolism; Metabolism of terpenoids and polyketides; Brassinosteroid biosynthesis}	{At2g26710; KOG0157 Cytochrome P450 CYP4/CYP19/CYP26 subfamilies QI Secondary metabolites biosynthesis, transport and catabolism ; Lipid transport and metabolism ;}	{GO:0016705; oxidoreductase activity, acting on paired donors, with incorporation or reduction of molecular oxygen; molecular_function GO:0055114; oxidation-reduction process; biological_process GO:0005506; iron ion binding; molecular_function GO:0020037; heme binding; molecular_function}	{NA}	{PF00067:Cytochrome P450}	57,58,60,61,63,64
floralquinquenoside A(14)	transcript_HQ_HBZL_transcript13122/f2p0/1814	1	0	{XP_012086629.1; PREDICTED: glucan endo-1,3-beta-glucosidase 11-like [Jatropha curcas]}	{sp|Q8L868|E1311_ARATH; Glucan endo-1,3-beta-glucosidase 11 OS=Arabidopsis thaliana GN=At1g32860 PE=1 SV=1}	{cic:CICLE_v10020391mg; - - - - -}	{NA}	{GO:0004553; hydrolase activity, hydrolyzing O-glycosyl compounds; molecular_function GO:0005975; carbohydrate metabolic process; biological_process}	{NA}	{PF00332:Glycosyl hydrolases family 17}	57,58,60,61,63,64
floralquinquenoside A(14)	transcript_HQ_YNLB_transcript5066/f3p0/2749	1	0	{XP_010247191.1; PREDICTED: BEL1-like homeodomain protein 1 [Nelumbo nucifera]}	{sp|Q9SJ56|BLH1_ARATH; BEL1-like homeodomain protein 1 OS=Arabidopsis thaliana GN=BLH1 PE=1 SV=1}	{nnu:104590284; - - - - -}	{At2g35940; KOG0773 Transcription factor MEIS1 and related HOX domain proteins K Transcription ;}	{GO:0006355; regulation of transcription, DNA-dependent; biological_process GO:0003677; DNA binding; molecular_function}	{XM_012586118.1; PREDICTED: Gossypium raimondii BEL1-like homeodomain protein 1 (LOC105766599), transcript variant X3, mRNA}	{PF00046:Homeobox domain PF05920:Homeobox KN domain}	57,58,60,61,63,64
floralquinquenoside A(14)	transcript_HQ_HBZL_transcript12219/f2p0/1863	1	0	{XP_010243034.1; PREDICTED: 1-deoxy-D-xylulose 5-phosphate reductoisomerase, chloroplastic [Nelumbo nucifera]}	{sp|Q9XFS9|DXR_ARATH; 1-deoxy-D-xylulose 5-phosphate reductoisomerase, chloroplastic OS=Arabidopsis thaliana GN=DXR PE=2 SV=2}	{aly:ARALYDRAFT_919553; K00099 dxr 1-deoxy-D-xylulose-5-phosphate reductoisomerase 1.1.1.267 ko00900; Metabolism; Metabolism of terpenoids and polyketides; Terpenoid backbone biosynthesis}	{NA}	{GO:0005515; protein binding; molecular_function GO:0050661; NADP binding; molecular_function GO:0055114; oxidation-reduction process; biological_process GO:0070402; NADPH binding; molecular_function GO:0016620; oxidoreductase activity, acting on the aldehyde or oxo group of donors, NAD or NADP as acceptor; molecular_function GO:0051287; NAD binding; molecular_function GO:0016491; oxidoreductase …	{XM_010244732.2; PREDICTED: Nelumbo nucifera 1-deoxy-D-xylulose 5-phosphate reductoisomerase, chloroplastic (LOC104587215), mRNA}	{PF03447:Homoserine dehydrogenase, NAD binding domain PF01118:Semialdehyde dehydrogenase, NAD binding domain PF02670:1-deoxy-D-xylulose 5-phosphate reductoisomerase PF08436:1-deoxy-D-xylulose 5-phosphate reductoisomerase C-terminal}	57,58,60,61,63,64
floralquinquenoside A(14)	transcript_HQ_HBZL_transcript15758/f8p0/1752	1	0	{XP_010264666.1; PREDICTED: GATA transcription factor 8-like [Nelumbo nucifera]}	{sp|Q9SV30|GATA8_ARATH; GATA transcription factor 8 OS=Arabidopsis thaliana GN=GATA8 PE=2 SV=1}	{nnu:104594870; - - - - -}	{At3g54810; KOG1601 GATA-4/5/6 transcription factors K Transcription ;}	{GO:0008270; zinc ion binding; molecular_function GO:0003700; sequence-specific DNA binding transcription factor activity; molecular_function GO:0043565; sequence-specific DNA binding; molecular_function GO:0006355; regulation of transcription, DNA-dependent; biological_process}	{XM_016716503.1; PREDICTED: Capsicum annuum GATA transcription factor 8-like (LOC107870093), mRNA}	{PF00320:GATA zinc finger}	57,58,60,61,63,64
floralquinquenoside A(14)	transcript_HQ_HBZL_transcript13592/f2p0/1795	1	0	{BAF98466.1; cytochrome P450 [Coptis japonica var. dissecta]}	{sp|H2DH21|C7A29_PANGI; Cytochrome P450 CYP72A219 OS=Panax ginseng PE=2 SV=1}	{nnu:104610317; - - - - -}	{At3g14660; KOG0157 Cytochrome P450 CYP4/CYP19/CYP26 subfamilies QI Secondary metabolites biosynthesis, transport and catabolism ; Lipid transport and metabolism ;}	{GO:0016705; oxidoreductase activity, acting on paired donors, with incorporation or reduction of molecular oxygen; molecular_function GO:0055114; oxidation-reduction process; biological_process GO:0005506; iron ion binding; molecular_function GO:0020037; heme binding; molecular_function}	{HG670306.1; Triticum aestivum chromosome 3B, genomic scaffold, cultivar Chinese Spring}	{PF00067:Cytochrome P450}	57,58,60,61,63,64
floralquinquenoside A(14)	transcript_HQ_HBZL_transcript19089/f3p0/1346	1	0	{AAV74397.1; geranylgeranyl diphosphate synthase [Adonis aestivalis var. palaestina]}	{sp|P34802|GGPP1_ARATH; Heterodimeric geranylgeranyl pyrophosphate synthase large subunit 1, chloroplastic OS=Arabidopsis thaliana GN=GGPPS1 PE=1 SV=2}	{rcu:8268116; K13789 GGPS geranylgeranyl diphosphate synthase, type II [EC:2.5.1.1 2.5.1.10 2.5.1.29] 2.5.1.1,2.5.1.10,2.5.1.29 ko00900; Metabolism; Metabolism of terpenoids and polyketides; Terpenoid backbone biosynthesis}	{At4g36810; KOG0776 Geranylgeranyl pyrophosphate synthase/Polyprenyl synthetase H Coenzyme transport and metabolism ;}	{GO:0008299; isoprenoid biosynthetic process; biological_process}	{XM_002531145.2; PREDICTED: Ricinus communis geranylgeranyl pyrophosphate synthase 7, chloroplastic (LOC8268116), mRNA}	{PF00348:Polyprenyl synthetase}	57,58,60,61,63,64
floralquinquenoside A(14)	transcript_HQ_HBZL_transcript1680/f6p0/3374	1	0	{XP_010250595.1; PREDICTED: auxin response factor 8 isoform X1 [Nelumbo nucifera]}	{sp|Q258Y5|ARFL_ORYSI; Auxin response factor 12 OS=Oryza sativa subsp. indica GN=ARF12 PE=3 SV=1}	{nnu:104592798; - - - - -}	{NA}	{GO:0008017; microtubule binding; molecular_function GO:1901135; NA GO:0097367; NA GO:0007059; chromosome segregation; biological_process GO:0003677; DNA binding; molecular_function GO:0051301; cell division; biological_process GO:0009725; response to hormone stimulus; biological_process GO:0005634; nucleus; cellular_component GO:0005672; transcription factor TFIIA complex; cellular_component GO:…	{XR_734453.2; PREDICTED: Nelumbo nucifera auxin response factor 8 (LOC104592798), transcript variant X4, misc_RNA}	{PF02362:B3 DNA binding domain PF13580:SIS domain PF06507:Auxin response factor PF03153:Transcription factor IIA, alpha/beta subunit PF07160:Protein of unknown function (DUF1395)}	57,58,60,61,63,64
floralquinquenoside A(14)	transcript_HQ_HBZL_transcript22730/f2p0/962	1	0	{XP_010243826.1; PREDICTED: dehydration-responsive element-binding protein 1B-like [Nelumbo nucifera]}	{sp|P93835|DRE1B_ARATH; Dehydration-responsive element-binding protein 1B OS=Arabidopsis thaliana GN=DREB1B PE=2 SV=2}	{nnu:104587800; - - - - -}	{NA}	{GO:0006355; regulation of transcription, DNA-dependent; biological_process GO:0003700; sequence-specific DNA binding transcription factor activity; molecular_function}	{NA}	{PF00847:AP2 domain}	57,58,60,61,63,64
floralquinquenoside A(14)	transcript_HQ_HBZL_transcript10828/f3p0/1977	1	0	{XP_009594272.1; PREDICTED: premnaspirodiene oxygenase-like [Nicotiana tomentosiformis]}	{sp|A6YIH8|C7D55_HYOMU; Premnaspirodiene oxygenase OS=Hyoscyamus muticus GN=CYP71D55 PE=1 SV=1}	{nta:107776996; - - - - -}	{At3g26210; KOG0156 Cytochrome P450 CYP2 subfamily Q Secondary metabolites biosynthesis, transport and catabolism ;}	{GO:0020037; heme binding; molecular_function GO:0005506; iron ion binding; molecular_function GO:0016705; oxidoreductase activity, acting on paired donors, with incorporation or reduction of molecular oxygen; molecular_function GO:0055114; oxidation-reduction process; biological_process}	{XM_004135234.2; PREDICTED: Cucumis sativus cytochrome P450 71B37-like (LOC101203858), mRNA}	{PF00067:Cytochrome P450}	57,58,60,61,63,64
floralquinquenoside A(14)	transcript_HQ_HBZL_transcript6542/f2p0/2518	1	0	{XP_008231756.1; PREDICTED: protein ZINC INDUCED FACILITATOR-LIKE 1-like [Prunus mume]}	{sp|Q8RWN2|ZIF1_ARATH; Protein ZINC INDUCED FACILITATOR 1 OS=Arabidopsis thaliana GN=ZIF1 PE=1 SV=2}	{nnu:109113871; - - - - -}	{At5g13750; KOG2615 Permease of the major facilitator superfamily R General function prediction only ;}	{GO:0022857; transmembrane transporter activity; molecular_function GO:0055085; transmembrane transport; biological_process GO:0006810; transport; biological_process GO:0016021; integral to membrane; cellular_component}	{XM_018963410.1; PREDICTED: Juglans regia probable peptide/nitrate transporter At3g43790 (LOC108989699), transcript variant X3, mRNA}	{PF07690:Major Facilitator Superfamily PF00083:Sugar (and other) transporter PF06609:Fungal trichothecene efflux pump (TRI12)}	57,58,60,61,63,64
floralquinquenoside A(14)	transcript_HQ_HBZL_transcript19548/f3p0/1318	1	0	{XP_006492604.1; PREDICTED: probable 2-oxoglutarate/Fe(II)-dependent dioxygenase [Citrus sinensis]}	{sp|Q9ZSA7|DLO2_ARATH; Protein DMR6-LIKE OXYGENASE 2 OS=Arabidopsis thaliana GN=DLO2 PE=2 SV=1}	{cic:CICLE_v10005336mg; - - - - -}	{At4g10490; KOG0143 Iron/ascorbate family oxidoreductases QR Secondary metabolites biosynthesis, transport and catabolism ; General function prediction only ;}	{GO:0055114; oxidation-reduction process; biological_process GO:0016491; oxidoreductase activity; molecular_function}	{NA}	{PF03171:2OG-Fe(II) oxygenase superfamily}	57,58,60,61,63,64
floralquinquenoside A(14)	transcript_HQ_HBZL_transcript13632/f4p0/1773	1	0	{BAF80448.1; corytuberine synthase [Coptis japonica var. dissecta]}	{sp|P47195|C80A1_BERST; Berbamunine synthase OS=Berberis stolonifera GN=CYP80A1 PE=1 SV=1}	{nnu:104595105; K07408 CYP1A1 cytochrome P450 family 1 subfamily A polypeptide 1 1.14.14.1 ko00140; Metabolism; Lipid metabolism; Steroid hormone biosynthesis | ko00380; Metabolism; Amino acid metabolism; Tryptophan metabolism | ko00830; Metabolism; Metabolism of cofactors and vitamins; Retinol metabolism | ko00980; Metabolism; Xenobiotics biodegradation and metabolism; Metabolism of xenobiotics …	{At2g45570; KOG0156 Cytochrome P450 CYP2 subfamily Q Secondary metabolites biosynthesis, transport and catabolism ;}	{GO:0020037; heme binding; molecular_function GO:0005506; iron ion binding; molecular_function GO:0016705; oxidoreductase activity, acting on paired donors, with incorporation or reduction of molecular oxygen; molecular_function GO:0055114; oxidation-reduction process; biological_process}	{AB288053.1; Coptis japonica var. dissecta Cyp80G2 mRNA for corytuberine synthase, complete cds}	{PF00067:Cytochrome P450}	57,58,60,61,63,64
floralquinquenoside A(14)	transcript_HQ_HBZL_transcript2025/f3p0/3253	1	0	{XP_010260722.1; PREDICTED: ent-kaur-16-ene synthase, chloroplastic isoform X1 [Nelumbo nucifera]}	{sp|Q39548|KSB_CUCMA; Ent-kaur-16-ene synthase, chloroplastic OS=Cucurbita maxima PE=1 SV=1}	{nnu:104599747; K04121 E4.2.3.19 ent-kaurene synthase 4.2.3.19 ko00904; Metabolism; Metabolism of terpenoids and polyketides; Diterpenoid biosynthesis}	{NA}	{GO:0003824; NA GO:0010333; terpene synthase activity; molecular_function GO:0000287; magnesium ion binding; molecular_function GO:0016829; lyase activity; molecular_function GO:0008152; NA}	{XM_007213570.1; Prunus persica hypothetical protein (PRUPE_ppa001902mg) mRNA, complete cds}	{PF01397:Terpene synthase, N-terminal domain PF00432:Prenyltransferase and squalene oxidase repeat PF03936:Terpene synthase family, metal binding domain}	57,58,60,61,63,64
floralquinquenoside A(14)	transcript_HQ_HBZL_transcript8957/f4p0/2136	1	0	{CAN83470.1; hypothetical protein VITISV_030783 [Vitis vinifera]}	{sp|Q6Q3H3|TPSGD_VITVI; (-)-germacrene D synthase OS=Vitis vinifera GN=VIT_19s0014g04930 PE=1 SV=1}	{cit:102606948; K15803 GERD (-)-germacrene D synthase [EC:4.2.3.22 4.2.3.75] 4.2.3.22,4.2.3.75 ko00909; Metabolism; Metabolism of terpenoids and polyketides; Sesquiterpenoid and triterpenoid biosynthesis}	{NA}	{GO:0008152; NA GO:0005138; interleukin-6 receptor binding; molecular_function GO:0006955; immune response; biological_process GO:0010333; terpene synthase activity; molecular_function GO:0000287; magnesium ion binding; molecular_function GO:0016829; lyase activity; molecular_function GO:0005576; NA}	{NA}	{PF03936:Terpene synthase family, metal binding domain PF01397:Terpene synthase, N-terminal domain PF00489:Interleukin-6/G-CSF/MGF family}	57,58,60,61,63,64
floralquinquenoside A(14)	transcript_HQ_HBZL_transcript14842/f7p0/1711	1	0	{XP_010274721.1; PREDICTED: uncharacterized protein LOC104609967 [Nelumbo nucifera]}	{NA}	{cit:102611927; - - - - -}	{NA}	{GO:0016021; integral to membrane; cellular_component GO:0016020; membrane; cellular_component}	{XM_018969163.1; PREDICTED: Juglans regia uncharacterized LOC108994075 (LOC108994075), mRNA}	{PF00892:EamA-like transporter family}	57,58,60,61,63,64
floralquinquenoside A(14)	transcript_HQ_HBZL_transcript8239/f4p0/2206	1	0	{XP_010270814.1; PREDICTED: probable beta-1,4-xylosyltransferase IRX14H [Nelumbo nucifera]}	{sp|Q8L707|IRX14_ARATH; Probable beta-1,4-xylosyltransferase IRX14 OS=Arabidopsis thaliana GN=IRX14 PE=2 SV=1}	{nnu:104607017; K20871 IRX14 putative beta-1,4-xylosyltransferase IRX14 2.4.2.- -}	{At5g67230; KOG1476 Beta-1,3-glucuronyltransferase B3GAT1/SQV-8 O Posttranslational modification, protein turnover, chaperones ;}	{GO:0015018; galactosylgalactosylxylosylprotein 3-beta-glucuronosyltransferase activity; molecular_function GO:0016020; membrane; cellular_component}	{AJ971043.1; Poncirus trifoliata mRNA for glycosyltransferase (pglcat8 gene)}	{PF03360:Glycosyltransferase family 43}	57,58,60,61,63,64
floralquinquenoside A(14)	transcript_HQ_HBZL_transcript21678/f2p0/1076	1	0	{XP_018811644.1; PREDICTED: heterodimeric geranylgeranyl pyrophosphate synthase small subunit, chloroplastic-like [Juglans regia]}	{sp|Q39108|GGR_ARATH; Heterodimeric geranylgeranyl pyrophosphate synthase small subunit, chloroplastic OS=Arabidopsis thaliana GN=GGR PE=1 SV=2}	{jcu:105632969; K13789 GGPS geranylgeranyl diphosphate synthase, type II [EC:2.5.1.1 2.5.1.10 2.5.1.29] 2.5.1.1,2.5.1.10,2.5.1.29 ko00900; Metabolism; Metabolism of terpenoids and polyketides; Terpenoid backbone biosynthesis}	{At4g38460; KOG0776 Geranylgeranyl pyrophosphate synthase/Polyprenyl synthetase H Coenzyme transport and metabolism ;}	{GO:0008299; isoprenoid biosynthetic process; biological_process}	{NA}	{PF00348:Polyprenyl synthetase}	57,58,60,61,63,64
floralquinquenoside A(14)	transcript_HQ_HBZL_transcript5921/f7p0/2486	1	0	{ACH88048.1; beta-amyrin synthase [Nigella sativa]}	{sp|Q8W3Z1|BAMS_BETPL; Beta-amyrin synthase OS=Betula platyphylla GN=OSCBPY PE=1 SV=1}	{sind:105173656; K15813 LUP4 beta-amyrin synthase 5.4.99.39 ko00909; Metabolism; Metabolism of terpenoids and polyketides; Sesquiterpenoid and triterpenoid biosynthesis}	{At1g78950; KOG0497 Oxidosqualene-lanosterol cyclase and related proteins I Lipid transport and metabolism ;}	{GO:0006355; regulation of transcription, DNA-dependent; biological_process GO:0003824; NA GO:0003700; sequence-specific DNA binding transcription factor activity; molecular_function GO:0005667; transcription factor complex; cellular_component GO:0005615; extracellular space; cellular_component}	{FJ013228.1; Nigella sativa beta-amyrin synthase (bas1) mRNA, complete cds}	{PF02319:E2F/DP family winged-helix DNA-binding domain PF07678:A-macroglobulin complement component PF00432:Prenyltransferase and squalene oxidase repeat}	57,58,60,61,63,64
floralquinquenoside A(14)	transcript_HQ_YNMLP_transcript6969/f6p0/2701	1	0	{XP_010273394.1; PREDICTED: transcription factor GTE11 [Nelumbo nucifera]}	{sp|Q9LS28|GTE12_ARATH; Transcription factor GTE12 OS=Arabidopsis thaliana GN=GTE12 PE=2 SV=2}	{cit:102614300; - - - - -}	{At5g46550; KOG1474 Transcription initiation factor TFIID, subunit BDF1 and related bromodomain proteins K Transcription ;}	{GO:0005515; protein binding; molecular_function}	{NA}	{PF00439:Bromodomain}	57,58,60,61,63,64
floralquinquenoside A(14)	transcript_HQ_HBZL_transcript7021/f3p0/2316	1	0	{XP_003632926.1; PREDICTED: mannosyl-oligosaccharide 1,2-alpha-mannosidase MNS1 [Vitis vinifera]}	{sp|Q9C512|MNS1_ARATH; Mannosyl-oligosaccharide 1,2-alpha-mannosidase MNS1 OS=Arabidopsis thaliana GN=MNS1 PE=1 SV=1}	{sind:105157913; K01230 MAN1 mannosyl-oligosaccharide alpha-1,2-mannosidase 3.2.1.113 ko00510; Metabolism; Glycan biosynthesis and metabolism; N-Glycan biosynthesis | ko00513; Metabolism; Glycan biosynthesis and metabolism; Various types of N-glycan biosynthesis | ko04141; Genetic Information Processing; Folding, sorting and degradation; Protein processing in endoplasmic reticulum}	{At1g51590; KOG2204 Mannosyl-oligosaccharide alpha-1,2-mannosidase and related glycosyl hydrolases G Carbohydrate transport and metabolism ;}	{GO:0004571; mannosyl-oligosaccharide 1,2-alpha-mannosidase activity; molecular_function GO:0005509; calcium ion binding; molecular_function GO:0016020; membrane; cellular_component}	{XM_003632878.3; PREDICTED: Vitis vinifera mannosyl-oligosaccharide 1,2-alpha-mannosidase MNS1 (LOC100852827), mRNA}	{PF01532:Glycosyl hydrolase family 47}	57,58,60,61,63,64
floralquinquenoside A(14)	transcript_HQ_HBZL_transcript13803/f5p0/1759	1	0	{ALG05141.1; cytochrome P450 family 71 subfamily BE polypeptide 54 [Sinopodophyllum hexandrum]}	{sp|A6YIH8|C7D55_HYOMU; Premnaspirodiene oxygenase OS=Hyoscyamus muticus GN=CYP71D55 PE=1 SV=1}	{jcu:105633070; - - - - -}	{At3g26210; KOG0156 Cytochrome P450 CYP2 subfamily Q Secondary metabolites biosynthesis, transport and catabolism ;}	{GO:0020037; heme binding; molecular_function GO:0005506; iron ion binding; molecular_function GO:0055114; oxidation-reduction process; biological_process GO:0016705; oxidoreductase activity, acting on paired donors, with incorporation or reduction of molecular oxygen; molecular_function}	{NA}	{PF00067:Cytochrome P450}	57,58,60,61,63,64
floralquinquenoside A(14)	transcript_HQ_HBZL_transcript3457/f2p0/2853	1	0	{XP_010266257.1; PREDICTED: monosaccharide-sensing protein 2 [Nelumbo nucifera]}	{sp|Q8LPQ8|MSSP2_ARATH; Monosaccharide-sensing protein 2 OS=Arabidopsis thaliana GN=MSSP2 PE=1 SV=2}	{jcu:105634811; - - - - -}	{At4g35300; KOG0254 Predicted transporter (major facilitator superfamily) R General function prediction only ;}	{GO:0016021; integral to membrane; cellular_component GO:0017025; TBP-class protein binding; molecular_function GO:0055085; transmembrane transport; biological_process GO:0022857; transmembrane transporter activity; molecular_function}	{XM_010267955.2; PREDICTED: Nelumbo nucifera monosaccharide-sensing protein 2 (LOC104603804), mRNA}	{PF00083:Sugar (and other) transporter PF00382:Transcription factor TFIIB repeat PF07690:Major Facilitator Superfamily}	57,58,60,61,63,64
floralquinquenoside A(14)	transcript_HQ_HBZL_transcript12257/f2p0/1863	1	0	{OAY28385.1; hypothetical protein MANES_15G062100 [Manihot esculenta]}	{sp|H2DH19|C7D31_PANGI; Cytochrome P450 CYP71D312 OS=Panax ginseng PE=2 SV=1}	{jcu:105633070; - - - - -}	{At3g26220; KOG0156 Cytochrome P450 CYP2 subfamily Q Secondary metabolites biosynthesis, transport and catabolism ;}	{GO:0005506; iron ion binding; molecular_function GO:0020037; heme binding; molecular_function GO:0055114; oxidation-reduction process; biological_process GO:0016705; oxidoreductase activity, acting on paired donors, with incorporation or reduction of molecular oxygen; molecular_function}	{XR_001692225.1; PREDICTED: Gossypium hirsutum uncharacterized LOC107926621 (LOC107926621), ncRNA}	{PF00067:Cytochrome P450}	57,58,60,61,63,64
floralquinquenoside A(14)	transcript_HQ_HBZL_transcript14932/f7p0/1686	1	0	{ALG05127.1; cytochrome P450 [Sinopodophyllum hexandrum]}	{sp|Q9LHA1|C8D11_ARATH; Cytochrome P450 81D11 OS=Arabidopsis thaliana GN=CYP81D11 PE=2 SV=1}	{pmum:103320389; - - - - -}	{At4g37370; KOG0156 Cytochrome P450 CYP2 subfamily Q Secondary metabolites biosynthesis, transport and catabolism ;}	{GO:0055114; oxidation-reduction process; biological_process GO:0016705; oxidoreductase activity, acting on paired donors, with incorporation or reduction of molecular oxygen; molecular_function GO:0020037; heme binding; molecular_function GO:0005506; iron ion binding; molecular_function}	{AB374404.1; Coptis japonica var. dissecta CYP81B25 mRNA for cytochrome P450, complete cds}	{PF00067:Cytochrome P450}	57,58,60,61,63,64
floralquinquenoside A(14)	transcript_HQ_HBZL_transcript194/f2p0/5090	1	0	{XP_010267164.1; PREDICTED: ABC transporter G family member 36-like [Nelumbo nucifera]}	{sp|Q9XIE2|AB36G_ARATH; ABC transporter G family member 36 OS=Arabidopsis thaliana GN=ABCG36 PE=1 SV=1}	{sot:102578847; - - - - -}	{At1g59870; KOG0065 Pleiotropic drug resistance proteins (PDR1-15), ABC superfamily Q Secondary metabolites biosynthesis, transport and catabolism ;}	{GO:0042626; ATPase activity, coupled to transmembrane movement of substances; molecular_function GO:0016020; membrane; cellular_component GO:0005525; GTP binding; molecular_function GO:0006810; transport; biological_process GO:0003924; GTPase activity; molecular_function GO:0016887; ATPase activity; molecular_function GO:0016021; integral to membrane; cellular_component GO:0005524; ATP binding; …	{XM_010268862.2; PREDICTED: Nelumbo nucifera ABC transporter G family member 36-like (LOC104604499), mRNA}	{PF00005:ABC transporter PF06422:CDR ABC transporter PF00004:ATPase family associated with various cellular activities (AAA) PF13304:AAA domain, putative AbiEii toxin, Type IV TA system PF03193:Protein of unknown function, DUF258 PF01061:ABC-2 type transporter}	57,58,60,61,63,64
floralquinquenoside A(14)	transcript_HQ_HBZL_transcript9390/f2p0/2110	1	0	{XP_010242871.1; PREDICTED: probable flavin-containing monooxygenase 1 isoform X1 [Nelumbo nucifera]}	{sp|Q9LMA1|FMO1_ARATH; Probable flavin-containing monooxygenase 1 OS=Arabidopsis thaliana GN=FMO1 PE=2 SV=1}	{fve:101296440; K00485 FMO dimethylaniline monooxygenase (N-oxide forming) 1.14.13.8 ko00982; Metabolism; Xenobiotics biodegradation and metabolism; Drug metabolism - cytochrome P450}	{At1g19250; KOG1399 Flavin-containing monooxygenase Q Secondary metabolites biosynthesis, transport and catabolism ;}	{GO:0050661; NADP binding; molecular_function GO:0055114; oxidation-reduction process; biological_process GO:0050660; flavin adenine dinucleotide binding; molecular_function GO:0016491; oxidoreductase activity; molecular_function GO:0004499; flavin-containing monooxygenase activity; molecular_function}	{XM_013608387.1; Medicago truncatula flavin-binding monooxygenase-like protein partial mRNA}	{PF00743:Flavin-binding monooxygenase-like PF07992:Pyridine nucleotide-disulphide oxidoreductase}	57,58,60,61,63,64
floralquinquenoside A(14)	transcript_HQ_HBZL_transcript1905/f2p0/3290	1	0	{EOY00403.1; Trehalose-phosphatase/synthase 9 [Theobroma cacao]}	{sp|Q9LRA7|TPS9_ARATH; Probable alpha,alpha-trehalose-phosphate synthase [UDP-forming] 9 OS=Arabidopsis thaliana GN=TPS9 PE=2 SV=1}	{cic:CICLE_v10030691mg; K16055 TPS trehalose 6-phosphate synthase/phosphatase [EC:2.4.1.15 3.1.3.12] 2.4.1.15,3.1.3.12 ko00500; Metabolism; Carbohydrate metabolism; Starch and sucrose metabolism}	{At1g23870; KOG1050 Trehalose-6-phosphate synthase component TPS1 and related subunits G Carbohydrate transport and metabolism ;}	{GO:0005992; trehalose biosynthetic process; biological_process GO:0003824; NA}	{XM_010273676.2; PREDICTED: Nelumbo nucifera probable alpha,alpha-trehalose-phosphate synthase [UDP-forming] 9 (LOC104607905), transcript variant X6, mRNA}	{PF00982:Glycosyltransferase family 20 PF02358:Trehalose-phosphatase}	57,58,60,61,63,64
floralquinquenoside A(14)	transcript_HQ_HBZL_transcript11797/f3p0/1902	1	0	{BAF98466.1; cytochrome P450 [Coptis japonica var. dissecta]}	{sp|H2DH21|C7A29_PANGI; Cytochrome P450 CYP72A219 OS=Panax ginseng PE=2 SV=1}	{nnu:104610308; - - - - -}	{At3g14690; KOG0157 Cytochrome P450 CYP4/CYP19/CYP26 subfamilies QI Secondary metabolites biosynthesis, transport and catabolism ; Lipid transport and metabolism ;}	{GO:0020037; heme binding; molecular_function GO:0005506; iron ion binding; molecular_function GO:0055114; oxidation-reduction process; biological_process GO:0016705; oxidoreductase activity, acting on paired donors, with incorporation or reduction of molecular oxygen; molecular_function}	{HG670306.1; Triticum aestivum chromosome 3B, genomic scaffold, cultivar Chinese Spring}	{PF00067:Cytochrome P450}	57,58,60,61,63,64
floralquinquenoside A(14)	transcript_HQ_HBZL_transcript5357/f2p0/2598	1	0	{ADC84219.1; putative 2,3 oxidosqualene cyclase [Actaea racemosa]}	{sp|O82139|CAS1_PANGI; Cycloartenol Synthase OS=Panax ginseng GN=OSCPNX1 PE=1 SV=1}	{pmum:103323709; K01853 CAS1 cycloartenol synthase 5.4.99.8 ko00100; Metabolism; Lipid metabolism; Steroid biosynthesis}	{At2g07050; KOG0497 Oxidosqualene-lanosterol cyclase and related proteins I Lipid transport and metabolism ;}	{GO:0003824; NA}	{GU136146.1; Actaea racemosa putative 2,3 oxidosqualene cyclase (CAS1) mRNA, complete cds}	{PF00432:Prenyltransferase and squalene oxidase repeat}	57,58,60,61,63,64
floralquinquenoside A(14)	transcript_HQ_HBZL_transcript1657/f2p0/3390	1	0	{XP_010249228.1; PREDICTED: alpha-mannosidase At3g26720-like [Nelumbo nucifera]}	{sp|P94078|MANA1_ARATH; Alpha-mannosidase At3g26720 OS=Arabidopsis thaliana GN=At3g26720 PE=1 SV=1}	{nnu:104591858; K01191 E3.2.1.24 alpha-mannosidase 3.2.1.24 ko00511; Metabolism; Glycan biosynthesis and metabolism; Other glycan degradation}	{At3g26720; KOG1959 Glycosyl hydrolase, family 38 - alpha-mannosidase G Carbohydrate transport and metabolism ;}	{GO:0006013; mannose metabolic process; biological_process GO:0015923; mannosidase activity; molecular_function GO:0005975; carbohydrate metabolic process; biological_process GO:0008270; zinc ion binding; molecular_function GO:0004559; alpha-mannosidase activity; molecular_function GO:0004553; hydrolase activity, hydrolyzing O-glycosyl compounds; molecular_function}	{XM_008233020.2; PREDICTED: Prunus mume alpha-mannosidase (LOC103330438), transcript variant X2, mRNA}	{PF01074:Glycosyl hydrolases family 38 N-terminal domain PF09261:Alpha mannosidase middle domain PF07748:Glycosyl hydrolases family 38 C-terminal domain}	57,58,60,61,63,64
floralquinquenoside A(14)	transcript_HQ_HBZL_transcript11706/f4p0/1894	1	0	{XP_010263644.1; PREDICTED: sugar transporter ERD6-like 6 [Nelumbo nucifera]}	{sp|Q93YP9|ERDL4_ARATH; Sugar transporter ERD6-like 4 OS=Arabidopsis thaliana GN=At1g19450 PE=2 SV=1}	{nnu:104595672; K08145 SLC2A8, GLUT8 MFS transporter, SP family, solute carrier family 2 (facilitated glucose transporter), member 8 - -}	{At1g19450; KOG0254 Predicted transporter (major facilitator superfamily) R General function prediction only ;}	{GO:0016021; integral to membrane; cellular_component GO:0055085; transmembrane transport; biological_process GO:0022857; transmembrane transporter activity; molecular_function}	{XM_018955091.1; PREDICTED: Juglans regia sugar transporter ERD6-like 6 (LOC108983457), mRNA}	{PF00083:Sugar (and other) transporter PF07690:Major Facilitator Superfamily}	57,58,60,61,63,64
floralquinquenoside A(14)	transcript_HQ_HBZL_transcript3362/f20p0/2854	1	0	{XP_010277558.1; PREDICTED: ent-copalyl diphosphate synthase, chloroplastic-like [Nelumbo nucifera]}	{sp|E2IHE0|CLDS_CISCR; Copal-8-ol diphosphate hydratase, chloroplastic OS=Cistus creticus subsp. creticus GN=CLS PE=1 SV=1}	{nnu:104611948; K04120 E5.5.1.13 ent-copalyl diphosphate synthase 5.5.1.13 ko00904; Metabolism; Metabolism of terpenoids and polyketides; Diterpenoid biosynthesis}	{NA}	{GO:0008152; NA GO:0000287; magnesium ion binding; molecular_function GO:0016829; lyase activity; molecular_function GO:0003824; NA GO:0010333; terpene synthase activity; molecular_function}	{XM_010279256.2; PREDICTED: Nelumbo nucifera ent-copalyl diphosphate synthase, chloroplastic-like (LOC104611948), mRNA}	{PF03936:Terpene synthase family, metal binding domain PF00432:Prenyltransferase and squalene oxidase repeat PF01397:Terpene synthase, N-terminal domain}	57,58,60,61,63,64
floralquinquenoside A(14)	transcript_HQ_HBZL_transcript743/f2p0/3963	1	0	{AJO70168.1; alpha,alpha-trehalose-phosphate synthase 7 [Camellia sinensis]}	{sp|Q9LMI0|TPS7_ARATH; Probable alpha,alpha-trehalose-phosphate synthase [UDP-forming] 7 OS=Arabidopsis thaliana GN=TPS7 PE=1 SV=1}	{vvi:100265140; K16055 TPS trehalose 6-phosphate synthase/phosphatase [EC:2.4.1.15 3.1.3.12] 2.4.1.15,3.1.3.12 ko00500; Metabolism; Carbohydrate metabolism; Starch and sucrose metabolism}	{At1g06410; KOG1050 Trehalose-6-phosphate synthase component TPS1 and related subunits G Carbohydrate transport and metabolism ;}	{GO:0003824; NA GO:0005992; trehalose biosynthetic process; biological_process}	{XM_002268138.3; PREDICTED: Vitis vinifera probable alpha,alpha-trehalose-phosphate synthase [UDP-forming] 7 (LOC100265140), mRNA}	{PF02358:Trehalose-phosphatase PF00982:Glycosyltransferase family 20}	57,58,60,61,63,64
floralquinquenoside A(14)	transcript_HQ_HBZL_transcript12899/f2p0/1820	1	0	{XP_018853643.1; PREDICTED: taxadiene 5-alpha hydroxylase-like [Juglans regia]}	{sp|I7CT85|C7A53_PANGI; Protopanaxadiol 6-hydroxylase OS=Panax ginseng PE=1 SV=1}	{pmum:103339873; - - - - -}	{At5g36110; KOG0157 Cytochrome P450 CYP4/CYP19/CYP26 subfamilies QI Secondary metabolites biosynthesis, transport and catabolism ; Lipid transport and metabolism ;}	{GO:0020037; heme binding; molecular_function GO:0005506; iron ion binding; molecular_function GO:0055114; oxidation-reduction process; biological_process GO:0016705; oxidoreductase activity, acting on paired donors, with incorporation or reduction of molecular oxygen; molecular_function}	{NA}	{PF00067:Cytochrome P450}	57,58,60,61,63,64
floralquinquenoside A(14)	transcript_HQ_HBZL_transcript4370/f10p0/2672	1	0	{XP_010259116.1; PREDICTED: probable galacturonosyltransferase 14 [Nelumbo nucifera]}	{sp|Q8GWT1|GAUTE_ARATH; Probable galacturonosyltransferase 14 OS=Arabidopsis thaliana GN=GAUT14 PE=2 SV=1}	{nnu:104598644; K20867 GAUT12S galacturonosyltransferase 12/13/14/15 2.4.1.- -}	{NA}	{GO:0016757; transferase activity, transferring glycosyl groups; molecular_function}	{XM_010260814.2; PREDICTED: Nelumbo nucifera probable galacturonosyltransferase 14 (LOC104598644), mRNA}	{PF01501:Glycosyl transferase family 8}	57,58,60,61,63,64
floralquinquenoside A(14)	transcript_HQ_HBZL_transcript18668/f8p0/1372	1	0	{XP_010275167.1; PREDICTED: protein SAWADEE HOMEODOMAIN HOMOLOG 2 isoform X1 [Nelumbo nucifera]}	{sp|Q8RWJ7|SHH2_ARATH; Protein SAWADEE HOMEODOMAIN HOMOLOG 2 OS=Arabidopsis thaliana GN=SHH2 PE=2 SV=1}	{cit:102622694; - - - - -}	{NA}	{GO:0003682; chromatin binding; molecular_function GO:0003677; DNA binding; molecular_function}	{XM_010276866.2; PREDICTED: Nelumbo nucifera protein SAWADEE HOMEODOMAIN HOMOLOG 2 (LOC104610310), transcript variant X2, mRNA}	{PF00046:Homeobox domain PF16719:SAWADEE domain}	57,58,60,61,63,64
floralquinquenoside A(14)	transcript_HQ_HBZL_transcript16049/f4p0/1636	1	0	{XP_011100190.1; PREDICTED: 7-deoxyloganetin glucosyltransferase-like [Sesamum indicum]}	{sp|F8WLS6|UGT6_CATRO; 7-deoxyloganetin glucosyltransferase OS=Catharanthus roseus GN=UGT85A23 PE=1 SV=1}	{vvi:100853145; K21374 - - 2.4.1.324 -}	{At1g22360; KOG1192 UDP-glucuronosyl and UDP-glucosyl transferase GC Carbohydrate transport and metabolism ; Energy production and conversion ;}	{GO:0008152; NA GO:0005975; carbohydrate metabolic process; biological_process GO:0030259; lipid glycosylation; biological_process GO:0016758; transferase activity, transferring hexosyl groups; molecular_function}	{XM_003522131.3; PREDICTED: Glycine max 7-deoxyloganetic acid glucosyltransferase-like (LOC100782592), mRNA}	{PF04101:Glycosyltransferase family 28 C-terminal domain PF03033:Glycosyltransferase family 28 N-terminal domain PF00201:UDP-glucoronosyl and UDP-glucosyl transferase}	57,58,60,61,63,64
floralquinquenoside A(14)	transcript_HQ_HBZL_transcript3144/f2p0/2880	1	0	{XP_008227980.1; PREDICTED: 7-dehydrocholesterol reductase [Prunus mume]}	{sp|Q9LDU6|ST7R_ARATH; 7-dehydrocholesterol reductase OS=Arabidopsis thaliana GN=DWF5 PE=1 SV=1}	{sind:105157928; K00213 DHCR7 7-dehydrocholesterol reductase 1.3.1.21 ko00100; Metabolism; Lipid metabolism; Steroid biosynthesis}	{At1g50430; KOG1435 Sterol reductase/lamin B receptor IT Lipid transport and metabolism ; Signal transduction mechanisms ;}	{GO:0016020; membrane; cellular_component}	{XM_002268419.4; PREDICTED: Vitis vinifera 7-dehydrocholesterol reductase (LOC100256426), transcript variant X4, mRNA}	{PF01222:Ergosterol biosynthesis ERG4/ERG24 family}	57,58,60,61,63,64
floralquinquenoside A(14)	transcript_HQ_HBZL_transcript11864/f14p0/1909	1	0	{BAO04173.1; hypothetical protein [Delphinium grandiflorum]}	{sp|E3W9M3|AA7GT_DELGR; Cyanidin 3-O-glucoside 7-O-glucosyltransferase (acyl-glucose) OS=Delphinium grandiflorum GN=AA7GT PE=1 SV=1}	{egu:105045203; K01188 E3.2.1.21 beta-glucosidase 3.2.1.21 ko00500; Metabolism; Carbohydrate metabolism; Starch and sucrose metabolism | ko00460; Metabolism; Metabolism of other amino acids; Cyanoamino acid metabolism | ko00940; Metabolism; Biosynthesis of other secondary metabolites; Phenylpropanoid biosynthesis}	{At1g02850; KOG0626 Beta-glucosidase, lactase phlorizinhydrolase, and related proteins G Carbohydrate transport and metabolism ;}	{GO:0004553; hydrolase activity, hydrolyzing O-glycosyl compounds; molecular_function GO:0005975; carbohydrate metabolic process; biological_process}	{AB811439.1; Delphinium grandiflorum DgBGLU2 mRNA for hypothetical protein, complete cds}	{PF00232:Glycosyl hydrolase family 1}	57,58,60,61,63,64
floralquinquenoside A(14)	transcript_HQ_HBZL_transcript14752/f2p0/1710	1	0	{XP_010278672.1; PREDICTED: probable beta-1,3-galactosyltransferase 2 isoform X1 [Nelumbo nucifera]}	{sp|A8MRC7|B3GT2_ARATH; Probable beta-1,3-galactosyltransferase 2 OS=Arabidopsis thaliana GN=B3GALT2 PE=2 SV=1}	{cit:102626490; K20855 B3GALT1S beta-1,3-galactosyltransferase 1/2/3/4/5/7/8 2.4.1.- -}	{At1g05170; KOG2288 Galactosyltransferases G Carbohydrate transport and metabolism ;}	{GO:0016020; membrane; cellular_component GO:0006486; protein glycosylation; biological_process GO:0016757; transferase activity, transferring glycosyl groups; molecular_function GO:0008378; galactosyltransferase activity; molecular_function}	{XM_010280370.2; PREDICTED: Nelumbo nucifera probable beta-1,3-galactosyltransferase 2 (LOC104612794), transcript variant X1, mRNA}	{PF01762:Galactosyltransferase PF02434:Fringe-like}	57,58,60,61,63,64
floralquinquenoside A(14)	transcript_HQ_HBZL_transcript10870/f2p0/1983	1	0	{ALG05121.1; cytochrome P450 [Sinopodophyllum hexandrum]}	{sp|Q8VWZ7|C76B6_CATRO; Geraniol 8-hydroxylase OS=Catharanthus roseus GN=CYP76B6 PE=1 SV=1}	{nnu:104611525; - - - - -}	{At4g12300; KOG0156 Cytochrome P450 CYP2 subfamily Q Secondary metabolites biosynthesis, transport and catabolism ;}	{GO:0055114; oxidation-reduction process; biological_process GO:0016705; oxidoreductase activity, acting on paired donors, with incorporation or reduction of molecular oxygen; molecular_function GO:0020037; heme binding; molecular_function GO:0005506; iron ion binding; molecular_function}	{NA}	{PF00067:Cytochrome P450}	57,58,60,61,63,64
floralquinquenoside A(14)	transcript_HQ_HBZL_transcript15883/f4p0/1643	1	0	{CDX93581.1; BnaA06g04670D [Brassica napus]}	{sp|Q9SGE0|AXS2_ARATH; UDP-D-apiose/UDP-D-xylose synthase 2 OS=Arabidopsis thaliana GN=AXS2 PE=2 SV=1}	{nnu:104587342; K12449 AXS UDP-apiose/xylose synthase - ko00520; Metabolism; Carbohydrate metabolism; Amino sugar and nucleotide sugar metabolism}	{At1g08200; KOG1429 dTDP-glucose 4-6-dehydratase/UDP-glucuronic acid decarboxylase GM Carbohydrate transport and metabolism ; Cell wall/membrane/envelope biogenesis ;}	{GO:0055114; oxidation-reduction process; biological_process GO:0016491; oxidoreductase activity; molecular_function GO:0016616; oxidoreductase activity, acting on the CH-OH group of donors, NAD or NADP as acceptor; molecular_function GO:0006694; steroid biosynthetic process; biological_process GO:0003854; 3-beta-hydroxy-delta5-steroid dehydrogenase activity; molecular_function GO:0003824; NA GO:…	{XM_010244908.2; PREDICTED: Nelumbo nucifera UDP-D-apiose/UDP-D-xylose synthase 2 (LOC104587342), mRNA}	{PF01073:3-beta hydroxysteroid dehydrogenase/isomerase family PF03721:UDP-glucose/GDP-mannose dehydrogenase family, NAD binding domain PF03435:Saccharopine dehydrogenase NADP binding domain PF01370:NAD dependent epimerase/dehydratase family}	57,58,60,61,63,64
floralquinquenoside A(14)	transcript_HQ_HBZL_transcript11871/f2p0/1915	1	0	{XP_010277529.1; PREDICTED: putative UDP-rhamnose:rhamnosyltransferase 1 [Nelumbo nucifera]}	{sp|Q9LTA3|U91C1_ARATH; UDP-glycosyltransferase 91C1 OS=Arabidopsis thaliana GN=UGT91C1 PE=2 SV=1}	{vvi:100246402; - - - - -}	{At5g49690; KOG1192 UDP-glucuronosyl and UDP-glucosyl transferase GC Carbohydrate transport and metabolism ; Energy production and conversion ;}	{GO:0008152; NA GO:0016758; transferase activity, transferring hexosyl groups; molecular_function}	{XM_016694121.1; PREDICTED: Capsicum annuum putative UDP-rhamnose:rhamnosyltransferase 1 (LOC107849565), mRNA}	{PF00201:UDP-glucoronosyl and UDP-glucosyl transferase}	57,58,60,61,63,64
floralquinquenoside A(14)	transcript_HQ_HBZL_transcript9379/f3p0/2093	1	0	{XP_006856348.2; PREDICTED: cytochrome P450 734A1 [Amborella trichopoda]}	{sp|O48786|C734A_ARATH; Cytochrome P450 734A1 OS=Arabidopsis thaliana GN=CYP734A1 PE=2 SV=1}	{atr:18446161; K15639 CYP734A1, BAS1 PHYB activation tagged suppressor 1 1.14.-.- ko00905; Metabolism; Metabolism of terpenoids and polyketides; Brassinosteroid biosynthesis}	{At2g26710; KOG0157 Cytochrome P450 CYP4/CYP19/CYP26 subfamilies QI Secondary metabolites biosynthesis, transport and catabolism ; Lipid transport and metabolism ;}	{GO:0016705; oxidoreductase activity, acting on paired donors, with incorporation or reduction of molecular oxygen; molecular_function GO:0055114; oxidation-reduction process; biological_process GO:0020037; heme binding; molecular_function GO:0005506; iron ion binding; molecular_function}	{NA}	{PF00067:Cytochrome P450}	57,58,60,61,63,64
floralquinquenoside A(14)	transcript_HQ_HBZL_transcript15493/f2p0/1644	1	0	{XP_010275943.1; PREDICTED: transcription factor bHLH128-like [Nelumbo nucifera]}	{sp|Q8H102|BH128_ARATH; Transcription factor bHLH128 OS=Arabidopsis thaliana GN=BHLH128 PE=1 SV=1}	{jcu:105629297; - - - - -}	{NA}	{GO:0046983; protein dimerization activity; molecular_function}	{XM_010277641.2; PREDICTED: Nelumbo nucifera transcription factor bHLH128-like (LOC104610833), mRNA}	{PF00010:Helix-loop-helix DNA-binding domain}	57,58,60,61,63,64
floralquinquenoside A(14)	transcript_HQ_HBZL_transcript18957/f5p0/1345	1	0	{ADZ72833.1; CONSTANS-like protein [Aquilegia formosa]}	{sp|Q96502|COL2_ARATH; Zinc finger protein CONSTANS-LIKE 2 OS=Arabidopsis thaliana GN=COL2 PE=1 SV=1}	{nnu:104597821; - - - - -}	{At3g02380; KOG1601 GATA-4/5/6 transcription factors K Transcription ;}	{GO:0005515; protein binding; molecular_function GO:0005215; NA GO:0016020; membrane; cellular_component GO:0006811; ion transport; biological_process GO:0016787; hydrolase activity; molecular_function GO:0008270; zinc ion binding; molecular_function GO:0005622; intracellular; cellular_component GO:0046872; metal ion binding; molecular_function}	{HQ173331.1; Aquilegia formosa CONSTANS-like protein (CO) mRNA, complete cds}	{PF00643:B-box zinc finger PF03522:Solute carrier family 12 PF06203:CCT motif PF09297:NADH pyrophosphatase zinc ribbon domain}	57,58,60,61,63,64
floralquinquenoside A(14)	transcript_HQ_HBZL_transcript19552/f2p0/1303	1	0	{XP_010266832.1; PREDICTED: basic leucine zipper 23-like [Nelumbo nucifera]}	{sp|Q8VY76|BZP19_ARATH; Basic leucine zipper 19 OS=Arabidopsis thaliana GN=BZIP19 PE=2 SV=1}	{rcu:8266428; - - - - -}	{NA}	{GO:0003700; sequence-specific DNA binding transcription factor activity; molecular_function GO:0043565; sequence-specific DNA binding; molecular_function GO:0006355; regulation of transcription, DNA-dependent; biological_process}	{XR_001582295.1; PREDICTED: Ziziphus jujuba uncharacterized LOC107427517 (LOC107427517), transcript variant X4, misc_RNA}	{PF00170:bZIP transcription factor PF07716:Basic region leucine zipper}	57,58,60,61,63,64
floralquinquenoside A(14)	transcript_HQ_HBZL_transcript17299/f40p0/1499	1	0	{XP_018810973.1; PREDICTED: 3'-N-debenzoyl-2'-deoxytaxol N-benzoyltransferase-like [Juglans regia]}	{sp|Q5JNT2|AT4_ORYSJ; Acyl transferase 4 OS=Oryza sativa subsp. japonica GN=AT4 PE=1 SV=1}	{egr:104434419; - - - - -}	{NA}	{GO:0016747; transferase activity, transferring acyl groups other than amino-acyl groups; molecular_function}	{NA}	{PF02458:Transferase family}	57,58,60,61,63,64
floralquinquenoside A(14)	transcript_HQ_HBZL_transcript12394/f2p0/1870	1	0	{XP_010261277.1; PREDICTED: uncharacterized protein LOC104600132 [Nelumbo nucifera]}	{NA}	{nnu:104600132; - - - - -}	{At1g78130; KOG1330 Sugar transporter/spinster transmembrane protein G Carbohydrate transport and metabolism ;}	{GO:0016021; integral to membrane; cellular_component GO:0006810; transport; biological_process GO:0055085; transmembrane transport; biological_process GO:0005215; NA GO:0016020; membrane; cellular_component GO:0022857; transmembrane transporter activity; molecular_function}	{XM_010270925.2; PREDICTED: Nelumbo nucifera uncharacterized MFS-type transporter YwfA-like (LOC104605963), transcript variant X1, mRNA}	{PF07690:Major Facilitator Superfamily PF03137:Organic Anion Transporter Polypeptide (OATP) family PF00083:Sugar (and other) transporter}	57,58,60,61,63,64
floralquinquenoside A(14)	transcript_HQ_HBZL_transcript14042/f3p0/1747	1	0	{XP_008241479.1; PREDICTED: taxadiene 5-alpha hydroxylase-like [Prunus mume]}	{sp|Q8W4T9|T13H_TAXCU; Taxane 13-alpha-hydroxylase OS=Taxus cuspidata GN=CYP725A2 PE=1 SV=1}	{pmum:103339873; - - - - -}	{At5g36110; KOG0157 Cytochrome P450 CYP4/CYP19/CYP26 subfamilies QI Secondary metabolites biosynthesis, transport and catabolism ; Lipid transport and metabolism ;}	{GO:0005506; iron ion binding; molecular_function GO:0020037; heme binding; molecular_function GO:0016705; oxidoreductase activity, acting on paired donors, with incorporation or reduction of molecular oxygen; molecular_function GO:0055114; oxidation-reduction process; biological_process}	{NA}	{PF00067:Cytochrome P450}	57,58,60,61,63,64
floralquinquenoside A(14)	transcript_HQ_HBZL_transcript20043/f3p0/1244	1	0	{ADF36484.1; 2C-methyl-D-erythritol 2,4-cyclodiphosphate synthase [Ageratina adenophora]}	{sp|Q9CAK8|ISPF_ARATH; 2-C-methyl-D-erythritol 2,4-cyclodiphosphate synthase, chloroplastic OS=Arabidopsis thaliana GN=ISPF PE=1 SV=1}	{pop:POPTR_0003s13230g; K01770 ispF 2-C-methyl-D-erythritol 2,4-cyclodiphosphate synthase 4.6.1.12 ko00900; Metabolism; Metabolism of terpenoids and polyketides; Terpenoid backbone biosynthesis}	{NA}	{GO:0008685; 2-C-methyl-D-erythritol 2,4-cyclodiphosphate synthase activity; molecular_function GO:0016114; terpenoid biosynthetic process; biological_process}	{XM_002297976.2; Populus trichocarpa hypothetical protein (POPTR_0001s09860g) mRNA, complete cds}	{PF02542:YgbB family}	57,58,60,61,63,64
floralquinquenoside A(14)	transcript_HQ_HBZL_transcript13394/f13p0/1723	1	0	{XP_010256899.1; PREDICTED: oxysterol-binding protein-related protein 3C-like [Nelumbo nucifera]}	{sp|Q9LZM1|ORP3A_ARATH; Oxysterol-binding protein-related protein 3A OS=Arabidopsis thaliana GN=ORP3A PE=1 SV=1}	{nnu:104597169; - - - - -}	{At5g02100; KOG1737 Oxysterol-binding protein I Lipid transport and metabolism ;}	{GO:0016788; hydrolase activity, acting on ester bonds; molecular_function GO:0043022; ribosome binding; molecular_function GO:0009405; pathogenesis; biological_process GO:0003723; RNA binding; molecular_function}	{XM_010264224.1; PREDICTED: Nelumbo nucifera oxysterol-binding protein-related protein 3A-like (LOC104601041), transcript variant X1, mRNA}	{PF09000:Cytotoxic}	57,58,60,61,63,64
floralquinquenoside A(14)	transcript_HQ_HBZL_transcript12490/f84p0/1802	1	0	{AJD20226.1; putative N-methylcoclaurine 3-hydroxylase [Podophyllum peltatum]}	{sp|P37121|C76A1_SOLME; Cytochrome P450 76A1 (Fragment) OS=Solanum melongena GN=CYP76A1 PE=2 SV=1}	{rcu:8274889; K20618 CYP76A cytochrome P450 family 76 subfamily A - -}	{At3g52970; KOG0156 Cytochrome P450 CYP2 subfamily Q Secondary metabolites biosynthesis, transport and catabolism ;}	{GO:0016705; oxidoreductase activity, acting on paired donors, with incorporation or reduction of molecular oxygen; molecular_function GO:0055114; oxidation-reduction process; biological_process GO:0005506; iron ion binding; molecular_function GO:0020037; heme binding; molecular_function}	{NA}	{PF00067:Cytochrome P450}	57,58,60,61,63,64
floralquinquenoside A(14)	transcript_HQ_HBZL_transcript12177/f3p0/1885	1	0	{OAY35714.1; hypothetical protein MANES_12G124200 [Manihot esculenta]}	{sp|Q9FFN2|GLYT3_ARATH; Probable glycosyltransferase At5g03795 OS=Arabidopsis thaliana GN=At5g03795 PE=3 SV=2}	{vvi:100248961; - - - - -}	{At4g38040; KOG1021 Acetylglucosaminyltransferase EXT1/exostosin 1 GMW Carbohydrate transport and metabolism ; Cell wall/membrane/envelope biogenesis ; Extracellular structures ;}	{NA}	{XM_018959596.1; PREDICTED: Juglans regia probable glycosyltransferase At5g03795 (LOC108986829), mRNA}	{NA}	57,58,60,61,63,64
floralquinquenoside A(14)	transcript_HQ_HBZL_transcript12816/f15p0/1810	1	0	{AAG21984.1; LYTB-like protein precursor [Adonis aestivalis var. palaestina]}	{sp|Q94B35|ISPH_ARATH; 4-hydroxy-3-methylbut-2-enyl diphosphate reductase, chloroplastic OS=Arabidopsis thaliana GN=ISPH PE=2 SV=1}	{nnu:104595783; K03527 ispH, lytB 4-hydroxy-3-methylbut-2-en-1-yl diphosphate reductase 1.17.7.4 ko00900; Metabolism; Metabolism of terpenoids and polyketides; Terpenoid backbone biosynthesis}	{NA}	{GO:0046872; metal ion binding; molecular_function GO:0019288; isopentenyl diphosphate biosynthetic process, mevalonate-independent pathway; biological_process GO:0051745; 4-hydroxy-3-methylbut-2-en-1-yl diphosphate reductase activity; molecular_function GO:0050992; dimethylallyl diphosphate biosynthetic process; biological_process}	{AF270978.1; Adonis palaestina LYTB-like protein precursor (lytB) mRNA, complete cds}	{PF02401:LytB protein}	57,58,60,61,63,64
floralquinquenoside A(14)	transcript_HQ_HBZL_transcript9045/f2p0/2103	1	0	{AIO10970.1; limonene synthase [Eleutherococcus trifoliatus]}	{sp|B3TPQ7|ATESY_MAGGA; Alpha-terpineol synthase, chloroplastic OS=Magnolia grandiflora PE=1 SV=1}	{vvi:100855144; K18108 E4.2.3.111 (-)-alpha-terpineol synthase 4.2.3.111 ko00902; Metabolism; Metabolism of terpenoids and polyketides; Monoterpenoid biosynthesis}	{NA}	{GO:0010333; terpene synthase activity; molecular_function GO:0016829; lyase activity; molecular_function GO:0000287; magnesium ion binding; molecular_function GO:0008152; NA}	{XM_012219969.1; PREDICTED: Jatropha curcas uncharacterized LOC105636646 (LOC105636646), mRNA}	{PF01397:Terpene synthase, N-terminal domain PF03936:Terpene synthase family, metal binding domain}	57,58,60,61,63,64
floralquinquenoside A(14)	transcript_HQ_HBZL_transcript6788/f2p0/2354	1	0	{XP_010241494.1; PREDICTED: CMP-sialic acid transporter 2-like [Nelumbo nucifera]}	{sp|Q8GY97|CSTR2_ARATH; CMP-sialic acid transporter 2 OS=Arabidopsis thaliana GN=At2g43240 PE=2 SV=1}	{sind:105158763; - - - - -}	{At3g59360; KOG2234 Predicted UDP-galactose transporter G Carbohydrate transport and metabolism ;}	{GO:0005351; sugar:hydrogen symporter activity; molecular_function GO:0016020; membrane; cellular_component GO:0016021; integral to membrane; cellular_component GO:0000139; Golgi membrane; cellular_component GO:0008643; carbohydrate transport; biological_process}	{XM_014772251.1; PREDICTED: Glycine max probable UDP-sugar transporter protein SLC35A4-like (LOC100815055), transcript variant X7, mRNA}	{PF04142:Nucleotide-sugar transporter PF00892:EamA-like transporter family}	57,58,60,61,63,64
floralquinquenoside A(14)	transcript_HQ_HBZL_transcript12074/f4p0/1913	1	0	{AJD20226.1; putative N-methylcoclaurine 3-hydroxylase [Podophyllum peltatum]}	{sp|P37122|C76A2_SOLME; Cytochrome P450 76A2 OS=Solanum melongena GN=CYP76A2 PE=2 SV=1}	{rcu:8274889; K20618 CYP76A cytochrome P450 family 76 subfamily A - -}	{At3g52970; KOG0156 Cytochrome P450 CYP2 subfamily Q Secondary metabolites biosynthesis, transport and catabolism ;}	{GO:0005506; iron ion binding; molecular_function GO:0020037; heme binding; molecular_function GO:0055114; oxidation-reduction process; biological_process GO:0016705; oxidoreductase activity, acting on paired donors, with incorporation or reduction of molecular oxygen; molecular_function}	{NA}	{PF00067:Cytochrome P450}	57,58,60,61,63,64
floralquinquenoside A(14)	transcript_HQ_HBZL_transcript10802/f3p0/1966	1	0	{XP_010260709.1; PREDICTED: anthocyanidin 3-O-glucosyltransferase 2-like [Nelumbo nucifera]}	{sp|D3UAG0|U71K1_MALDO; UDP-glycosyltransferase 71K1 OS=Malus domestica GN=UGT71K1 PE=1 SV=1}	{nnu:104599738; - - - - -}	{At3g21760; KOG1192 UDP-glucuronosyl and UDP-glucosyl transferase GC Carbohydrate transport and metabolism ; Energy production and conversion ;}	{GO:0016758; transferase activity, transferring hexosyl groups; molecular_function GO:0008152; NA}	{XM_009768137.1; PREDICTED: Nicotiana sylvestris anthocyanidin 3-O-glucosyltransferase 2-like (LOC104217805), mRNA}	{PF04101:Glycosyltransferase family 28 C-terminal domain PF00201:UDP-glucoronosyl and UDP-glucosyl transferase}	57,58,60,61,63,64
floralquinquenoside A(14)	transcript_HQ_HBZL_transcript9976/f9p0/2044	1	0	{XP_010277296.1; PREDICTED: delta(24)-sterol reductase [Nelumbo nucifera]}	{sp|P93472|DIM_PEA; Delta(24)-sterol reductase OS=Pisum sativum GN=DIM PE=1 SV=1}	{vvi:100258158; K09828 DHCR24, DWF1 Delta24-sterol reductase [EC:1.3.1.72 1.3.1.-] 1.3.1.72,1.3.1.- ko00100; Metabolism; Lipid metabolism; Steroid biosynthesis}	{At3g19820; KOG1262 FAD-binding protein DIMINUTO R General function prediction only ;}	{GO:0050660; flavin adenine dinucleotide binding; molecular_function GO:0055114; oxidation-reduction process; biological_process GO:0016491; oxidoreductase activity; molecular_function}	{XM_007222407.1; Prunus persica hypothetical protein (PRUPE_ppa003520mg) mRNA, complete cds}	{PF01565:FAD binding domain }	57,58,60,61,63,64
floralquinquenoside A(14)	transcript_HQ_HBZL_transcript10104/f2p0/2043	1	0	{XP_010257021.1; PREDICTED: laccase-12-like [Nelumbo nucifera]}	{sp|Q9SIY8|LAC5_ARATH; Laccase-5 OS=Arabidopsis thaliana GN=LAC5 PE=2 SV=1}	{nnu:104597263; K05909 E1.10.3.2 laccase 1.10.3.2 -}	{At2g40370; KOG1263 Multicopper oxidases Q Secondary metabolites biosynthesis, transport and catabolism ;}	{GO:0055114; oxidation-reduction process; biological_process GO:0016491; oxidoreductase activity; molecular_function GO:0005507; copper ion binding; molecular_function}	{XM_010258719.2; PREDICTED: Nelumbo nucifera laccase-12-like (LOC104597263), mRNA}	{PF07732:Multicopper oxidase PF07731:Multicopper oxidase PF00394:Multicopper oxidase}	57,58,60,61,63,64
floralquinquenoside A(14)	transcript_HQ_HBZL_transcript13993/f2p0/1751	1	0	{XP_018853643.1; PREDICTED: taxadiene 5-alpha hydroxylase-like [Juglans regia]}	{sp|Q8W4T9|T13H_TAXCU; Taxane 13-alpha-hydroxylase OS=Taxus cuspidata GN=CYP725A2 PE=1 SV=1}	{pmum:103339873; - - - - -}	{At5g36110; KOG0157 Cytochrome P450 CYP4/CYP19/CYP26 subfamilies QI Secondary metabolites biosynthesis, transport and catabolism ; Lipid transport and metabolism ;}	{GO:0005506; iron ion binding; molecular_function GO:0020037; heme binding; molecular_function GO:0016705; oxidoreductase activity, acting on paired donors, with incorporation or reduction of molecular oxygen; molecular_function GO:0055114; oxidation-reduction process; biological_process}	{NA}	{PF00067:Cytochrome P450}	57,58,60,61,63,64
floralquinquenoside A(14)	transcript_HQ_HBZL_transcript23267/f3p0/901	1	0	{XP_010277785.1; PREDICTED: anthocyanidin 3-O-glucoside 2''-O-glucosyltransferase-like [Nelumbo nucifera]}	{sp|Q9T081|U79B3_ARATH; UDP-glycosyltransferase 79B3 OS=Arabidopsis thaliana GN=UGT79B3 PE=2 SV=1}	{nnu:104599491; - - - - -}	{At4g27570; KOG1192 UDP-glucuronosyl and UDP-glucosyl transferase GC Carbohydrate transport and metabolism ; Energy production and conversion ;}	{GO:0008152; NA GO:0016758; transferase activity, transferring hexosyl groups; molecular_function}	{NA}	{PF00201:UDP-glucoronosyl and UDP-glucosyl transferase}	57,58,60,61,63,64
floralquinquenoside A(14)	transcript_HQ_HBZL_transcript3733/f2p0/2806	1	0	{XP_010254309.1; PREDICTED: probable 1-deoxy-D-xylulose-5-phosphate synthase, chloroplastic isoform X1 [Nelumbo nucifera]}	{sp|O78328|DXS_CAPAN; Probable 1-deoxy-D-xylulose-5-phosphate synthase, chloroplastic OS=Capsicum annuum GN=TKT2 PE=2 SV=1}	{nnu:104595318; K01662 dxs 1-deoxy-D-xylulose-5-phosphate synthase 2.2.1.7 ko00730; Metabolism; Metabolism of cofactors and vitamins; Thiamine metabolism | ko00900; Metabolism; Metabolism of terpenoids and polyketides; Terpenoid backbone biosynthesis}	{At5g11380; KOG0523 Transketolase G Carbohydrate transport and metabolism ;}	{GO:0008661; 1-deoxy-D-xylulose-5-phosphate synthase activity; molecular_function GO:0016114; terpenoid biosynthetic process; biological_process}	{XM_010256007.1; PREDICTED: Nelumbo nucifera probable 1-deoxy-D-xylulose-5-phosphate synthase, chloroplastic (LOC104595318), transcript variant X1, mRNA}	{PF13292:1-deoxy-D-xylulose-5-phosphate synthase}	57,58,60,61,63,64
α-D-glucopyranosyl-(1->3)-α-D-glucopyranosyl-(1->4)-D-glucopyranose(4)	transcript_HQ_SCEZ_transcript21565/f2p0/988	0.904252	0.0350499	{XP_010264908.1; PREDICTED: acid phosphatase 1 [Nelumbo nucifera]}	{sp|P27061|PPA1_SOLLC; Acid phosphatase 1 OS=Solanum lycopersicum GN=APS1 PE=2 SV=1}	{atr:18447333; - - - - -}	{NA}	{NA}	{XM_008237387.1; PREDICTED: Prunus mume acid phosphatase 1-like (LOC103334419), transcript variant X2, mRNA}	{NA}	4,5,8	F
α-D-glucopyranosyl-(1->3)-α-D-glucopyranosyl-(1->4)-D-glucopyranose(4)	transcript_HQ_YNMLP_transcript8505/f2p0/2682	0.91779	0.027944	{XP_003635418.1; PREDICTED: probable xyloglucan glycosyltransferase 6 [Vitis vinifera]}	{sp|Q9SRT3|CSLC6_ARATH; Probable xyloglucan glycosyltransferase 6 OS=Arabidopsis thaliana GN=CSLC6 PE=1 SV=1}	{vvi:100250441; - - - - -}	{NA}	{GO:0016757; transferase activity, transferring glycosyl groups; molecular_function}	{XM_010248369.2; PREDICTED: Nelumbo nucifera probable xyloglucan glycosyltransferase 6 (LOC104589898), mRNA}	{PF13506:Glycosyl transferase family 21}	4,5,8
α-D-glucopyranosyl-(1->3)-α-D-glucopyranosyl-(1->4)-D-glucopyranose(4)	transcript_HQ_SCJY_transcript18256/f2p0/1024	0.912286	0.030771	{XP_011069726.1; PREDICTED: mannose-P-dolichol utilization defect 1 protein homolog 2 [Sesamum indicum]}	{sp|Q8VY63|MPU12_ARATH; Mannose-P-dolichol utilization defect 1 protein homolog 2 OS=Arabidopsis thaliana GN=At4g07390 PE=2 SV=1}	{sind:105155532; K09660 MPDU1 mannose-P-dolichol utilization defect 1 - -}	{At5g59470; KOG3211 Predicted endoplasmic reticulum membrane protein Lec35/MPDU1 involved in monosaccharide-P-dolichol utilization R General function prediction only ;}	{NA}	{XM_010061592.2; PREDICTED: Eucalyptus grandis mannose-P-dolichol utilization defect 1 protein homolog 2 (LOC104447865), mRNA}	{NA}	4,5,8
α-D-glucopyranosyl-(1->3)-α-D-glucopyranosyl-(1->4)-D-glucopyranose(4)	transcript_HQ_YNLB_transcript18667/f2p0/1124	0.934692	0.0198371	{XP_018820037.1; PREDICTED: dihydroceramide fatty acyl 2-hydroxylase FAH1-like [Juglans regia]}	{sp|O48916|FAH1_ARATH; Dihydroceramide fatty acyl 2-hydroxylase FAH1 OS=Arabidopsis thaliana GN=FAH1 PE=1 SV=1}	{mus:103971669; K19706 FAH dihydroceramide fatty acyl 2-hydroxylase 1.14.18.7 -}	{At2g34770; KOG0539 Sphingolipid fatty acid hydroxylase I Lipid transport and metabolism ;}	{GO:0006633; fatty acid biosynthetic process; biological_process GO:0055114; oxidation-reduction process; biological_process GO:0016491; oxidoreductase activity; molecular_function GO:0009058; biosynthetic process; biological_process GO:0005506; iron ion binding; molecular_function}	{XM_006468279.2; PREDICTED: Citrus sinensis fatty acid 2-hydroxylase 1-like (LOC102617628), transcript variant X2, mRNA}	{PF04116:Fatty acid hydroxylase superfamily PF04715:Anthranilate synthase component I, N terminal region}	4,5,8
α-D-glucopyranosyl-(1->3)-α-D-glucopyranosyl-(1->4)-D-glucopyranose(4)	transcript_HQ_YNMLP_transcript9899/f2p0/2368	0.884125	0.0465179	{ONI17038.1; hypothetical protein PRUPE_3G134100 [Prunus persica]}	{sp|Q8H1D4|DRB4_ARATH; Double-stranded RNA-binding protein 4 OS=Arabidopsis thaliana GN=DBR4 PE=1 SV=1}	{fve:101290988; - - - - -}	{NA}	{GO:0009523; photosystem II; cellular_component GO:0016020; membrane; cellular_component GO:0015979; photosynthesis; biological_process}	{NA}	{PF06596:Photosystem II reaction centre X protein (PsbX)}	4,5,8
α-D-glucopyranosyl-(1->3)-α-D-glucopyranosyl-(1->4)-D-glucopyranose(4)	transcript_HQ_YNLB_transcript6199/f2p0/2567	0.890956	0.0425108	{XP_010274405.1; PREDICTED: cell division cycle and apoptosis regulator protein 1 [Nelumbo nucifera]}	{sp|Q641G3|CCAR1_XENLA; Cell division cycle and apoptosis regulator protein 1 OS=Xenopus laevis GN=ccar1 PE=2 SV=1}	{vvi:100260241; - - - - -}	{At2g03150; KOG4246 Predicted DNA-binding protein, contains SAP domain R General function prediction only ;}	{NA}	{XM_010276103.2; PREDICTED: Nelumbo nucifera cell division cycle and apoptosis regulator protein 1 (LOC104609729), mRNA}	{NA}	4,5,8
α-D-glucopyranosyl-(1->3)-α-D-glucopyranosyl-(1->4)-D-glucopyranose(4)	transcript_HQ_YNLB_transcript2183/f5p0/3365	0.900826	0.0369284	{XP_010245532.1; PREDICTED: leucine-rich repeat receptor-like protein kinase TDR [Nelumbo nucifera]}	{sp|Q9FII5|TDR_ARATH; Leucine-rich repeat receptor-like protein kinase TDR OS=Arabidopsis thaliana GN=TDR PE=1 SV=1}	{cit:102621098; - - - - -}	{NA}	{GO:0005515; protein binding; molecular_function}	{AM476179.1; Vitis vinifera, whole genome shotgun sequence, contig VV78X063671.13, clone ENTAV 115}	{PF13855:Leucine rich repeat PF00560:Leucine Rich Repeat PF13516:Leucine Rich repeat}	4,5,8
α-D-glucopyranosyl-(1->3)-α-D-glucopyranosyl-(1->4)-D-glucopyranose(4)	transcript_HQ_SCEZ_transcript9404/f5p0/2046	0.896401	0.0394007	{XP_010277010.1; PREDICTED: peptide-N4-(N-acetyl-beta-glucosaminyl)asparagine amidase A-like isoform X2 [Nelumbo nucifera]}	{sp|P81898|PNAA_PRUDU; Peptide-N4-(N-acetyl-beta-glucosaminyl)asparagine amidase A OS=Prunus dulcis PE=1 SV=2}	{nta:107774776; - - - - -}	{NA}	{NA}	{XM_010278709.2; PREDICTED: Nelumbo nucifera peptide-N4-(N-acetyl-beta-glucosaminyl)asparagine amidase A-like (LOC104611579), transcript variant X3, mRNA}	{NA}	4,5,8
β-D-glycero-Hex-2-ulofuranosyl-(2->1)-[β-D-glycero-hex-2-ulofuranosyl-(2->6)]-β-D-glycero-hex-2-ulofuranosyl-(2->1)-β-D-glycero-hex-2-ulofuranosyl α-D-erythro-hexopyranoside(2)	transcript_HQ_SCJY_transcript13376/f2p0/1580	0.95155	0.0127084	{XP_010255512.1; PREDICTED: COP9 signalosome complex subunit 1 [Nelumbo nucifera]}	{sp|P45432|CSN1_ARATH; COP9 signalosome complex subunit 1 OS=Arabidopsis thaliana GN=CSN1 PE=1 SV=2}	{nnu:104596161; K12175 GPS1, COPS1, CSN1 COP9 signalosome complex subunit 1 - -}	{At3g61140; KOG0686 COP9 signalosome, subunit CSN1 OT Posttranslational modification, protein turnover, chaperones ; Signal transduction mechanisms ;}	{GO:0006457; protein folding; biological_process GO:0005515; protein binding; molecular_function}	{XM_018954926.1; PREDICTED: Juglans regia COP9 signalosome complex subunit 1-like (LOC108983336), mRNA}	{PF01346:Domain amino terminal to FKBP-type peptidyl-prolyl isomerase PF01399:PCI domain PF08513:LisH}	2,5,8
α-D-glucopyranosyl-(1->3)-α-D-glucopyranosyl-(1->4)-D-glucopyranose(4)	transcript_HQ_SCEZ_transcript20216/f2p0/1161	-0.952897	0.0121848	{XP_010677971.1; PREDICTED: peptidyl-tRNA hydrolase, mitochondrial [Beta vulgaris subsp. vulgaris]}	{sp|Q8GW64|PTHC_ARATH; Peptidyl-tRNA hydrolase, chloroplastic OS=Arabidopsis thaliana GN=At1g18440 PE=2 SV=2}	{bvg:104893553; K01056 PTH1, pth, spoVC peptidyl-tRNA hydrolase, PTH1 family 3.1.1.29 -}	{At1g18440; KOG2255 Peptidyl-tRNA hydrolase J Translation, ribosomal structure and biogenesis ;}	{GO:0004045; aminoacyl-tRNA hydrolase activity; molecular_function}	{XM_007209422.1; Prunus persica hypothetical protein (PRUPE_ppa010131mg) mRNA, complete cds}	{PF01195:Peptidyl-tRNA hydrolase}	4,5,8
β-D-glycero-Hex-2-ulofuranosyl-(2->1)-[β-D-glycero-hex-2-ulofuranosyl-(2->6)]-β-D-glycero-hex-2-ulofuranosyl-(2->1)-β-D-glycero-hex-2-ulofuranosyl α-D-erythro-hexopyranoside(2)	transcript_HQ_YNMLP_transcript21092/f3p0/1121	0.919021	0.0273242	{XP_010242751.1; PREDICTED: gamma-secretase subunit APH1-like [Nelumbo nucifera]}	{sp|Q8L9G7|APH1_ARATH; Gamma-secretase subunit APH1-like OS=Arabidopsis thaliana GN=At2g31440 PE=2 SV=2}	{sot:102593469; - - - - -}	{7295913; KOG3972 Predicted membrane protein S Function unknown ;}	{GO:0016485; protein processing; biological_process GO:0043085; positive regulation of catalytic activity; biological_process GO:0016021; integral to membrane; cellular_component}	{NA}	{PF06105:Aph-1 protein}	2,5,8
α-D-glucopyranosyl-(1->3)-α-D-glucopyranosyl-(1->4)-D-glucopyranose(4)	transcript_HQ_YNMLP_transcript7869/f2p0/2604	0.990288	0.0011472	{XP_010260722.1; PREDICTED: ent-kaur-16-ene synthase, chloroplastic isoform X1 [Nelumbo nucifera]}	{sp|Q39548|KSB_CUCMA; Ent-kaur-16-ene synthase, chloroplastic OS=Cucurbita maxima PE=1 SV=1}	{nnu:104599747; K04121 E4.2.3.19 ent-kaurene synthase 4.2.3.19 ko00904; Metabolism; Metabolism of terpenoids and polyketides; Diterpenoid biosynthesis}	{NA}	{GO:0008152; NA GO:0000287; magnesium ion binding; molecular_function GO:0016829; lyase activity; molecular_function GO:0010333; terpene synthase activity; molecular_function}	{NA}	{PF01397:Terpene synthase, N-terminal domain PF03936:Terpene synthase family, metal binding domain}	4,5,8
α-D-glucopyranosyl-(1->3)-α-D-glucopyranosyl-(1->4)-D-glucopyranose(4)	transcript_HQ_SCEZ_transcript19363/f2p0/1291	0.942583	0.0163727	{XP_010938550.1; PREDICTED: UDP-D-xylose:L-fucose alpha-1,3-D-xylosyltransferase MGP4 [Elaeis guineensis]}	{sp|Q9M146|MGP4_ARATH; UDP-D-xylose:L-fucose alpha-1,3-D-xylosyltransferase MGP4 OS=Arabidopsis thaliana GN=MGP4 PE=2 SV=1}	{nnu:104593446; K11714 RGXT rhamnogalacturonan II specific xylosyltransferase 2.4.2.- -}	{NA}	{NA}	{XM_012227894.1; PREDICTED: Jatropha curcas UDP-D-xylose:L-fucose alpha-1,3-D-xylosyltransferase MGP4 (LOC105642907), mRNA}	{NA}	4,5,8
α-D-glucopyranosyl-(1->3)-α-D-glucopyranosyl-(1->4)-D-glucopyranose(4)	transcript_HQ_YNMLP_transcript4446/f3p0/3011	0.908616	0.0327036	{XP_002284379.1; PREDICTED: phosphatidylinositol 4-phosphate 5-kinase 1 [Vitis vinifera]}	{sp|Q56YP2|PI5K1_ARATH; Phosphatidylinositol 4-phosphate 5-kinase 1 OS=Arabidopsis thaliana GN=PIP5K1 PE=1 SV=1}	{fve:101293945; K00889 PIP5K 1-phosphatidylinositol-4-phosphate 5-kinase 2.7.1.68 ko00562; Metabolism; Carbohydrate metabolism; Inositol phosphate metabolism | ko04011; Environmental Information Processing; Signal transduction; MAPK signaling pathway - yeast | ko04070; Environmental Information Processing; Signal transduction; Phosphatidylinositol signaling system | ko04072; Environmental Informa…	{At1g21980; KOG0229 Phosphatidylinositol-4-phosphate 5-kinase T Signal transduction mechanisms ;}	{GO:0004674; protein serine/threonine kinase activity; molecular_function GO:0016307; phosphatidylinositol phosphate kinase activity; molecular_function GO:0046488; phosphatidylinositol metabolic process; biological_process}	{XM_010671125.2; PREDICTED: Beta vulgaris subsp. vulgaris phosphatidylinositol 4-phosphate 5-kinase 1 (LOC104886640), mRNA}	{PF11883:Domain of unknown function (DUF3403) PF01504:Phosphatidylinositol-4-phosphate 5-Kinase}	4,5,8
β-D-glycero-Hex-2-ulofuranosyl-(2->1)-[β-D-glycero-hex-2-ulofuranosyl-(2->6)]-β-D-glycero-hex-2-ulofuranosyl-(2->1)-β-D-glycero-hex-2-ulofuranosyl α-D-erythro-hexopyranoside(2)	transcript_HQ_YNLB_transcript4089/f3p0/2872	0.927132	0.0233523	{XP_010270896.1; PREDICTED: DNA (cytosine-5)-methyltransferase DRM2 isoform X3 [Nelumbo nucifera]}	{sp|Q6AUQ7|DRM3_ORYSJ; Probable inactive DNA (cytosine-5)-methyltransferase DRM3 OS=Oryza sativa subsp. japonica GN=DRM3 PE=2 SV=1}	{pmum:103323243; - - - - -}	{NA}	{NA}	{NA}	{NA}	2,5,8
α-D-glucopyranosyl-(1->3)-α-D-glucopyranosyl-(1->4)-D-glucopyranose(4)	transcript_HQ_YNMLP_transcript18779/f3p0/1332	0.887881	0.0443005	{XP_010254329.1; PREDICTED: protein arginine N-methyltransferase PRMT10 [Nelumbo nucifera]}	{sp|Q9MAT5|ANM10_ARATH; Protein arginine N-methyltransferase PRMT10 OS=Arabidopsis thaliana GN=PRMT10 PE=1 SV=1}	{nnu:104595331; K11434 PRMT1 type I protein arginine methyltransferase 2.1.1.319 ko04068; Environmental Information Processing; Signal transduction; FoxO signaling pathway | ko04922; Organismal Systems; Endocrine system; Glucagon signaling pathway}	{At1g04870; KOG1499 Protein arginine N-methyltransferase PRMT1 and related enzymes OKT Posttranslational modification, protein turnover, chaperones ; Transcription ; Signal transduction mechanisms ;}	{GO:0008649; rRNA methyltransferase activity; molecular_function GO:0008152; NA GO:0008168; methyltransferase activity; molecular_function GO:0005737; cytoplasm; cellular_component GO:0006364; rRNA processing; biological_process GO:0006479; protein methylation; biological_process}	{XM_002284990.3; PREDICTED: Vitis vinifera protein arginine N-methyltransferase PRMT10 (LOC100262845), mRNA}	{PF02527:rRNA small subunit methyltransferase G PF05185:PRMT5 arginine-N-methyltransferase PF08241:Methyltransferase domain PF05175:Methyltransferase small domain}	4,5,8
α-D-glucopyranosyl-(1->3)-α-D-glucopyranosyl-(1->4)-D-glucopyranose(4)	transcript_HQ_YNLB_transcript14825/f2p0/1656	0.969915	0.00623581	{XP_010272778.1; PREDICTED: F-box/LRR-repeat protein At4g14103-like isoform X1 [Nelumbo nucifera]}	{sp|Q9LXR4|FBL56_ARATH; Putative F-box/LRR-repeat protein At3g58880 OS=Arabidopsis thaliana GN=At3g58880 PE=4 SV=1}	{cann:107856371; - - - - -}	{NA}	{GO:0005515; protein binding; molecular_function}	{NA}	{PF12937:F-box-like PF00646:F-box domain}	4,5,8
α-D-glucopyranosyl-(1->3)-α-D-glucopyranosyl-(1->4)-D-glucopyranose(4)	transcript_HQ_YNLB_transcript16177/f2p0/1465	0.962481	0.00867469	{XP_010251294.1; PREDICTED: homeobox-leucine zipper protein HAT5-like isoform X1 [Nelumbo nucifera]}	{sp|Q02283|HAT5_ARATH; Homeobox-leucine zipper protein HAT5 OS=Arabidopsis thaliana GN=HAT5 PE=1 SV=1}	{nnu:104593226; K09338 HD-ZIP homeobox-leucine zipper protein - -}	{At3g01470; KOG0483 Transcription factor HEX, contains HOX and HALZ domains K Transcription ;}	{GO:0043565; sequence-specific DNA binding; molecular_function GO:0007049; cell cycle; biological_process GO:0003700; sequence-specific DNA binding transcription factor activity; molecular_function GO:0003677; DNA binding; molecular_function GO:0006355; regulation of transcription, DNA-dependent; biological_process}	{XM_007031371.2; PREDICTED: Theobroma cacao homeobox-leucine zipper protein HAT5 (LOC18600741), mRNA}	{PF00046:Homeobox domain PF02183:Homeobox associated leucine zipper PF00170:bZIP transcription factor PF05920:Homeobox KN domain PF04977:Septum formation initiator}	4,5,8
β-D-glycero-Hex-2-ulofuranosyl-(2->1)-[β-D-glycero-hex-2-ulofuranosyl-(2->6)]-β-D-glycero-hex-2-ulofuranosyl-(2->1)-β-D-glycero-hex-2-ulofuranosyl α-D-erythro-hexopyranoside(2)	transcript_HQ_HBZL_transcript7558/f2p0/2355	-0.936043	0.0192287	{EOX98160.1; 2-oxoglutarate and Fe(II)-dependent oxygenase superfamily protein [Theobroma cacao]}	{sp|Q8S9K8|MES10_ARATH; Methylesterase 10 OS=Arabidopsis thaliana GN=MES10 PE=2 SV=1}	{nnu:104595860; - - - - -}	{At3g19000; KOG0143 Iron/ascorbate family oxidoreductases QR Secondary metabolites biosynthesis, transport and catabolism ; General function prediction only ;}	{GO:0016491; oxidoreductase activity; molecular_function GO:0055114; oxidation-reduction process; biological_process}	{XM_019309979.1; PREDICTED: Ipomoea nil protein DMR6-LIKE OXYGENASE 2-like (LOC109161535), mRNA}	{PF03171:2OG-Fe(II) oxygenase superfamily}	2,5,8
β-D-glycero-Hex-2-ulofuranosyl-(2->1)-[β-D-glycero-hex-2-ulofuranosyl-(2->6)]-β-D-glycero-hex-2-ulofuranosyl-(2->1)-β-D-glycero-hex-2-ulofuranosyl α-D-erythro-hexopyranoside(2)	transcript_HQ_YNMLP_transcript7749/f2p0/2660	0.931682	0.0212147	{XP_010270190.1; PREDICTED: heat shock protein 90-6, mitochondrial-like isoform X1 [Nelumbo nucifera]}	{sp|F4JFN3|HS906_ARATH; Heat shock protein 90-6, mitochondrial OS=Arabidopsis thaliana GN=HSP90-6 PE=2 SV=1}	{vvi:100258010; K09487 HSP90B, TRA1 heat shock protein 90kDa beta - ko04141; Genetic Information Processing; Folding, sorting and degradation; Protein processing in endoplasmic reticulum | ko04151; Environmental Information Processing; Signal transduction; PI3K-Akt signaling pathway | ko04657; Organismal Systems; Immune system; IL-17 signaling pathway | ko04915; Organismal Systems; Endocrine syst…	{At3g07770; KOG0019 Molecular chaperone (HSP90 family) O Posttranslational modification, protein turnover, chaperones ;}	{GO:0005524; ATP binding; molecular_function GO:0006457; protein folding; biological_process GO:0051082; unfolded protein binding; molecular_function GO:0006950; response to stress; biological_process}	{XM_002269978.4; PREDICTED: Vitis vinifera heat shock protein 90-6, mitochondrial (LOC100258010), transcript variant X2, mRNA}	{PF00183:Hsp90 protein}	2,5,8
β-D-glycero-Hex-2-ulofuranosyl-(2->1)-[β-D-glycero-hex-2-ulofuranosyl-(2->6)]-β-D-glycero-hex-2-ulofuranosyl-(2->1)-β-D-glycero-hex-2-ulofuranosyl α-D-erythro-hexopyranoside(2)	transcript_HQ_SCEZ_transcript24032/f2p0/763	0.946504	0.0147335	{XP_011000286.1; PREDICTED: actin-depolymerizing factor 2 [Populus euphratica]}	{sp|Q9FVI1|ADF2_PETHY; Actin-depolymerizing factor 2 OS=Petunia hybrida GN=ADF2 PE=2 SV=1}	{pop:POPTR_0001s24330g; K05765 CFL cofilin - ko04810; Cellular Processes; Cell motility; Regulation of actin cytoskeleton | ko04666; Organismal Systems; Immune system; Fc gamma R-mediated phagocytosis | ko04360; Organismal Systems; Development; Axon guidance | ko05133; Human Diseases; Infectious diseases: Bacterial; Pertussis}	{At3g46010; KOG1735 Actin depolymerizing factor Z Cytoskeleton ;}	{GO:0005622; intracellular; cellular_component GO:0003779; actin binding; molecular_function}	{XM_007027028.2; PREDICTED: Theobroma cacao actin-depolymerizing factor 2 (LOC18597803), mRNA}	{PF00241:Cofilin/tropomyosin-type actin-binding protein}	2,5,8
α-D-glucopyranosyl-(1->3)-α-D-glucopyranosyl-(1->4)-D-glucopyranose(4)	transcript_HQ_YNLB_transcript4892/f2p0/2745	0.992843	0.000726105	{XP_010256812.1; PREDICTED: myb-related protein A [Nelumbo nucifera]}	{sp|F4IRB4|MYB88_ARATH; Transcription factor MYB124 OS=Arabidopsis thaliana GN=MYB88 PE=1 SV=1}	{nnu:104597103; K09422 MYBP myb proto-oncogene protein, plant - -}	{At2g02820; KOG0048 Transcription factor, Myb superfamily K Transcription ;}	{GO:0005634; nucleus; cellular_component GO:0016818; hydrolase activity, acting on acid anhydrides, in phosphorus-containing anhydrides; molecular_function GO:0004553; hydrolase activity, hydrolyzing O-glycosyl compounds; molecular_function GO:0005524; ATP binding; molecular_function GO:0006338; chromatin remodeling; biological_process GO:0008270; zinc ion binding; molecular_function GO:0003676; …	{XM_010258510.2; PREDICTED: Nelumbo nucifera myb-related protein A (LOC104597103), mRNA}	{PF09261:Alpha mannosidase middle domain PF09111:SLIDE}	4,5,8
β-D-glycero-Hex-2-ulofuranosyl-(2->1)-[β-D-glycero-hex-2-ulofuranosyl-(2->6)]-β-D-glycero-hex-2-ulofuranosyl-(2->1)-β-D-glycero-hex-2-ulofuranosyl α-D-erythro-hexopyranoside(2)	transcript_HQ_SCEZ_transcript6953/f2p0/2336	-0.916151	0.0287766	{CBI29193.3; unnamed protein product, partial [Vitis vinifera]}	{sp|Q8LPJ4|AB2E_ARATH; ABC transporter E family member 2 OS=Arabidopsis thaliana GN=ABCE2 PE=2 SV=1}	{gra:105791831; K06174 ABCE1, Rli1 ATP-binding cassette, sub-family E, member 1 - -}	{At4g19210; KOG0063 RNAse L inhibitor, ABC superfamily A RNA processing and modification ;}	{GO:0006614; SRP-dependent cotranslational protein targeting to membrane; biological_process GO:0005524; ATP binding; molecular_function GO:0003924; GTPase activity; molecular_function GO:0002949; NA GO:0005525; GTP binding; molecular_function GO:0016887; ATPase activity; molecular_function}	{XM_010276849.2; PREDICTED: Nelumbo nucifera ABC transporter E family member 2-like (LOC104610296), transcript variant X2, mRNA}	{PF00448:SRP54-type protein, GTPase domain PF02367:Threonylcarbamoyl adenosine biosynthesis protein TsaE PF07728:AAA domain (dynein-related subfamily) PF00005:ABC transporter PF03193:Protein of unknown function, DUF258 PF00004:ATPase family associated with various cellular activities (AAA) PF13304:AAA domain, putative AbiEii toxin, Type IV TA system}	2,5,8
β-D-glycero-Hex-2-ulofuranosyl-(2->1)-[β-D-glycero-hex-2-ulofuranosyl-(2->6)]-β-D-glycero-hex-2-ulofuranosyl-(2->1)-β-D-glycero-hex-2-ulofuranosyl α-D-erythro-hexopyranoside(2)	transcript_HQ_YNMLP_transcript2377/f2p0/3478	0.920112	0.0267784	{XP_010250524.1; PREDICTED: protein MEI2-like 4 isoform X1 [Nelumbo nucifera]}	{sp|Q64M78|OML4_ORYSJ; Protein MEI2-like 4 OS=Oryza sativa subsp. japonica GN=ML4 PE=2 SV=1}	{nnu:104592752; - - - - -}	{At5g61960; KOG4660 Protein Mei2, essential for commitment to meiosis, and related proteins D Cell cycle control, cell division, chromosome partitioning ;}	{GO:0003676; nucleic acid binding; molecular_function}	{XM_019196947.1; PREDICTED: Nelumbo nucifera protein MEI2-like 4 (LOC104592752), transcript variant X3, mRNA}	{PF00076:RNA recognition motif. (a.k.a. RRM, RBD, or RNP domain)}	2,5,8
β-D-glycero-Hex-2-ulofuranosyl-(2->1)-[β-D-glycero-hex-2-ulofuranosyl-(2->6)]-β-D-glycero-hex-2-ulofuranosyl-(2->1)-β-D-glycero-hex-2-ulofuranosyl α-D-erythro-hexopyranoside(2)	transcript_HQ_HBZL_transcript26193/f2p0/595	-0.901965	0.0363004	{XP_004296404.1; PREDICTED: protein PROTON GRADIENT REGULATION 5, chloroplastic [Fragaria vesca subsp. vesca]}	{sp|Q9SL05|PGR5_ARATH; Protein PROTON GRADIENT REGULATION 5, chloroplastic OS=Arabidopsis thaliana GN=PGR5 PE=1 SV=1}	{pmum:103323921; - - - - -}	{NA}	{NA}	{XM_010264129.2; PREDICTED: Nelumbo nucifera protein PROTON GRADIENT REGULATION 5, chloroplastic-like (LOC104600957), mRNA}	{NA}	2,5,8
α-D-glucopyranosyl-(1->3)-α-D-glucopyranosyl-(1->4)-D-glucopyranose(4)	transcript_HQ_SCEZ_transcript9786/f2p0/2034	0.901207	0.0367179	{XP_010273558.1; PREDICTED: probable RNA 3'-terminal phosphate cyclase-like protein [Nelumbo nucifera]}	{sp|Q9C578|RCL1_ARATH; Probable RNA 3'-terminal phosphate cyclase-like protein OS=Arabidopsis thaliana GN=At5g22100 PE=2 SV=1}	{sind:105165440; K11108 RCL1 RNA 3'-terminal phosphate cyclase-like protein - ko03008; Genetic Information Processing; Translation; Ribosome biogenesis in eukaryotes}	{Hs21361285; KOG3980 RNA 3'-terminal phosphate cyclase A RNA processing and modification ;}	{NA}	{XM_016011033.1; PREDICTED: Ziziphus jujuba probable RNA 3'-terminal phosphate cyclase-like protein (LOC107404083), mRNA}	{NA}	4,5,8
β-D-glycero-Hex-2-ulofuranosyl-(2->1)-[β-D-glycero-hex-2-ulofuranosyl-(2->6)]-β-D-glycero-hex-2-ulofuranosyl-(2->1)-β-D-glycero-hex-2-ulofuranosyl α-D-erythro-hexopyranoside(2)	transcript_HQ_YNLB_transcript18184/f2p0/1186	0.927139	0.0233491	{XP_010270477.1; PREDICTED: WUSCHEL-related homeobox 8-like [Nelumbo nucifera]}	{sp|Q5QMM3|WOX8_ORYSJ; WUSCHEL-related homeobox 8 OS=Oryza sativa subsp. japonica GN=WOX8 PE=2 SV=1}	{pda:103701108; - - - - -}	{NA}	{GO:0005634; nucleus; cellular_component GO:0006355; regulation of transcription, DNA-dependent; biological_process GO:0003677; DNA binding; molecular_function GO:0005524; ATP binding; molecular_function}	{NA}	{PF05920:Homeobox KN domain PF00046:Homeobox domain PF08880:QLQ}	2,5,8
α-D-glucopyranosyl-(1->3)-α-D-glucopyranosyl-(1->4)-D-glucopyranose(4)	transcript_HQ_YNLB_transcript3011/f2p0/3150	0.89488	0.0402618	{XP_010261379.1; PREDICTED: exocyst complex component SEC10-like [Nelumbo nucifera]}	{sp|X5JB51|SECAB_ARATH; Exocyst complex component SEC10b OS=Arabidopsis thaliana GN=SEC10b PE=1 SV=1}	{pop:POPTR_0002s16570g; K19984 EXOC5, SEC10 exocyst complex component 5 - -}	{Hs5730037; KOG3745 Exocyst subunit - Sec10p U Intracellular trafficking, secretion, and vesicular transport ;}	{GO:0048278; vesicle docking; biological_process GO:0006887; exocytosis; biological_process GO:0006891; intra-Golgi vesicle-mediated transport; biological_process GO:0017119; Golgi transport complex; cellular_component GO:0005737; cytoplasm; cellular_component}	{XM_010263079.2; PREDICTED: Nelumbo nucifera exocyst complex component SEC10-like (LOC104600227), transcript variant X2, mRNA}	{PF10392:Golgi transport complex subunit 5 PF07393:Exocyst complex component Sec10}	4,5,8
α-D-glucopyranosyl-(1->3)-α-D-glucopyranosyl-(1->4)-D-glucopyranose(4)	transcript_HQ_YNMLP_transcript22280/f3p0/954	0.954716	0.0114889	{XP_016500281.1; PREDICTED: vesicle transport protein SFT2B-like isoform X1 [Nicotiana tabacum]}	{sp|O95562|SFT2B_HUMAN; Vesicle transport protein SFT2B OS=Homo sapiens GN=SFT2D2 PE=1 SV=1}	{egr:104437839; - - - - -}	{At5g23550; KOG2887 Membrane protein involved in ER to Golgi transport U Intracellular trafficking, secretion, and vesicular transport ;}	{GO:0005887; integral to plasma membrane; cellular_component GO:0016192; vesicle-mediated transport; biological_process}	{AC253880.1; Aquilegia coerulea clone COL05-D05, complete sequence}	{PF11023:Zinc-ribbon containing domain PF04178:Got1/Sft2-like family }	4,5,8
α-D-glucopyranosyl-(1->3)-α-D-glucopyranosyl-(1->4)-D-glucopyranose(4)	transcript_HQ_HBZL_transcript6688/f2p0/2393	0.908102	0.0329773	{OMO70260.1; hypothetical protein COLO4_28666 [Corchorus olitorius]}	{sp|Q9EQN5|SMBP2_RAT; DNA-binding protein SMUBP-2 OS=Rattus norvegicus GN=Ighmbp2 PE=1 SV=1}	{pper:PRUPE_ppa002711mg; - - - - -}	{At2g03270; KOG1803 DNA helicase L Replication, recombination and repair ;}	{GO:0000723; telomere maintenance; biological_process GO:0003677; DNA binding; molecular_function GO:0005524; ATP binding; molecular_function GO:0016887; ATPase activity; molecular_function GO:0003676; nucleic acid binding; molecular_function GO:0006810; transport; biological_process GO:0009378; four-way junction helicase activity; molecular_function GO:0016787; hydrolase activity; molecular_func…	{XR_735204.2; PREDICTED: Nelumbo nucifera DNA-binding protein SMUBP-2 (LOC104597465), transcript variant X2, misc_RNA}	{PF04851:Type III restriction enzyme, res subunit PF01443:Viral (Superfamily 1) RNA helicase PF00004:ATPase family associated with various cellular activities (AAA) PF05970:PIF1-like helicase PF00437:Type II/IV secretion system protein PF02562:PhoH-like protein PF00005:ABC transporter PF00270:DEAD/DEAH box helicase PF05496:Holliday junction DNA helicase ruvB N-terminus}	4,5,8
β-D-glycero-Hex-2-ulofuranosyl-(2->1)-[β-D-glycero-hex-2-ulofuranosyl-(2->6)]-β-D-glycero-hex-2-ulofuranosyl-(2->1)-β-D-glycero-hex-2-ulofuranosyl α-D-erythro-hexopyranoside(2)	transcript_HQ_YNLB_transcript1850/f6p0/3590	0.884694	0.0461798	{XP_010272416.1; PREDICTED: protein SMG7L [Nelumbo nucifera]}	{sp|Q9FZ99|SMG7L_ARATH; Protein SMG7L OS=Arabidopsis thaliana GN=SMG7L PE=2 SV=1}	{cit:102621058; - - - - -}	{At1g28260; KOG2162 Nonsense-mediated mRNA decay protein A RNA processing and modification ;}	{NA}	{XM_019307307.1; PREDICTED: Ipomoea nil protein SMG7L-like (LOC109159221), mRNA}	{NA}	2,5,8
β-D-glycero-Hex-2-ulofuranosyl-(2->1)-[β-D-glycero-hex-2-ulofuranosyl-(2->6)]-β-D-glycero-hex-2-ulofuranosyl-(2->1)-β-D-glycero-hex-2-ulofuranosyl α-D-erythro-hexopyranoside(2)	transcript_HQ_SCEZ_transcript7061/f2p0/2272	0.949086	0.0136852	{XP_010254014.1; PREDICTED: probable glycosyltransferase At3g07620 [Nelumbo nucifera]}	{sp|Q9FFN2|GLYT3_ARATH; Probable glycosyltransferase At5g03795 OS=Arabidopsis thaliana GN=At5g03795 PE=3 SV=2}	{nnu:104595125; - - - - -}	{At5g19670; KOG1021 Acetylglucosaminyltransferase EXT1/exostosin 1 GMW Carbohydrate transport and metabolism ; Cell wall/membrane/envelope biogenesis ; Extracellular structures ;}	{NA}	{NA}	{NA}	2,5,8
α-D-glucopyranosyl-(1->3)-α-D-glucopyranosyl-(1->4)-D-glucopyranose(4)	transcript_HQ_YNLB_transcript3658/f4p0/2951	0.921374	0.0261513	{XP_010277046.1; PREDICTED: TPR repeat-containing thioredoxin TTL1-like [Nelumbo nucifera]}	{sp|Q9MAH1|TTL1_ARATH; TPR repeat-containing thioredoxin TTL1 OS=Arabidopsis thaliana GN=TTL1 PE=1 SV=1}	{vvi:100247135; - - - - -}	{At2g42580; KOG1124 FOG: TPR repeat R General function prediction only ;}	{GO:0046983; protein dimerization activity; molecular_function GO:0005576; NA GO:0042802; identical protein binding; molecular_function GO:0005515; protein binding; molecular_function GO:0007617; mating behavior; biological_process GO:0045454; cell redox homeostasis; biological_process}	{XM_010278744.2; PREDICTED: Nelumbo nucifera TPR repeat-containing thioredoxin TTL1-like (LOC104611607), mRNA}	{PF00085:Thioredoxin PF13181:Tetratricopeptide repeat PF05777:Drosophila accessory gland-specific peptide 26Ab (Acp26Ab) PF07721:Tetratricopeptide repeat PF13371:Tetratricopeptide repeat PF00515:Tetratricopeptide repeat PF14863:Alkyl sulfatase dimerisation PF13414:TPR repeat PF13374:Tetratricopeptide repeat}	4,5,8
α-D-glucopyranosyl-(1->3)-α-D-glucopyranosyl-(1->4)-D-glucopyranose(4)	transcript_HQ_SCEZ_transcript24992/f2p0/653	-0.894063	0.0407266	{XP_018845602.1; PREDICTED: AIG2-like protein [Juglans regia]}	{sp|A8MRP2|AIGLD_ARATH; AIG2-like protein D OS=Arabidopsis thaliana GN=AIG2LD PE=2 SV=1}	{fve:101312311; - - - - -}	{NA}	{NA}	{NA}	{NA}	4,5,8
β-D-glycero-Hex-2-ulofuranosyl-(2->1)-[β-D-glycero-hex-2-ulofuranosyl-(2->6)]-β-D-glycero-hex-2-ulofuranosyl-(2->1)-β-D-glycero-hex-2-ulofuranosyl α-D-erythro-hexopyranoside(2)	transcript_HQ_SCJY_transcript9263/f6p0/2001	-0.921232	0.0262215	{XP_010251101.1; PREDICTED: pescadillo homolog [Nelumbo nucifera]}	{sp|Q851S7|PESC_ORYSJ; Pescadillo homolog OS=Oryza sativa subsp. japonica GN=PES PE=2 SV=1}	{nnu:104593111; K14843 PES1, NOP7 pescadillo - -}	{At5g14520; KOG2481 Protein required for normal rRNA processing A RNA processing and modification ;}	{GO:0042254; ribosome biogenesis; biological_process GO:0005730; nucleolus; cellular_component}	{XM_019004339.1; PREDICTED: Juglans regia pescadillo homolog (LOC109021655), mRNA}	{PF06732:Pescadillo N-terminus}	2,5,8
α-D-glucopyranosyl-(1->3)-α-D-glucopyranosyl-(1->4)-D-glucopyranose(4)	transcript_HQ_YNLB_transcript9891/f3p0/2178	0.956129	0.0109578	{XP_007145577.1; hypothetical protein PHAVU_007G250300g [Phaseolus vulgaris]}	{sp|A7LXU3|BGH3B_BACO1; Beta-glucosidase BoGH3B OS=Bacteroides ovatus (strain ATCC 8483 / DSM 1896 / JCM 5824 / NCTC 11153) GN=BACOVA_02659 PE=1 SV=1}	{cic:CICLE_v10028018mg; K05349 bglX beta-glucosidase 3.2.1.21 ko00500; Metabolism; Carbohydrate metabolism; Starch and sucrose metabolism | ko00460; Metabolism; Metabolism of other amino acids; Cyanoamino acid metabolism | ko00940; Metabolism; Biosynthesis of other secondary metabolites; Phenylpropanoid biosynthesis}	{NA}	{GO:0004553; hydrolase activity, hydrolyzing O-glycosyl compounds; molecular_function GO:0005975; carbohydrate metabolic process; biological_process}	{XM_018974311.1; PREDICTED: Juglans regia beta-glucosidase BoGH3B-like (LOC108997931), transcript variant X2, mRNA}	{PF00933:Glycosyl hydrolase family 3 N terminal domain PF01915:Glycosyl hydrolase family 3 C-terminal domain}	4,5,8
α-D-glucopyranosyl-(1->3)-α-D-glucopyranosyl-(1->4)-D-glucopyranose(4)	transcript_HQ_YNLB_transcript16502/f2p0/1440	0.919427	0.0271206	{XP_017635500.1; PREDICTED: ATP synthase subunit alpha, mitochondrial-like [Gossypium arboreum]}	{NA}	{NA}	{NA}	{NA}	{DQ008771.1; Hernandia ovigera large subunit ribosomal RNA gene, partial sequence; mitochondrial}	{NA}	4,5,8
β-D-glycero-Hex-2-ulofuranosyl-(2->1)-[β-D-glycero-hex-2-ulofuranosyl-(2->6)]-β-D-glycero-hex-2-ulofuranosyl-(2->1)-β-D-glycero-hex-2-ulofuranosyl α-D-erythro-hexopyranoside(2)	transcript_HQ_SCJY_transcript2152/f6p0/2978	-0.910671	0.0316168	{XP_006468804.1; PREDICTED: ALG-2 interacting protein X [Citrus sinensis]}	{sp|Q8T7K0|ALIX_DICDI; ALG-2 interacting protein X OS=Dictyostelium discoideum GN=alxA PE=1 SV=1}	{cit:102623501; K12200 PDCD6IP, ALIX, RIM20 programmed cell death 6-interacting protein - ko04144; Cellular Processes; Transport and catabolism; Endocytosis}	{At1g15130; KOG2220 Predicted signal transduction protein R General function prediction only ;}	{GO:0016020; membrane; cellular_component GO:0006886; intracellular protein transport; biological_process GO:0005801; cis-Golgi network; cellular_component GO:0005515; protein binding; molecular_function}	{XM_010254625.2; PREDICTED: Nelumbo nucifera ALG-2 interacting protein X-like (LOC104594335), mRNA}	{PF04136:Sec34-like family PF13949:ALIX V-shaped domain binding to HIV }	2,5,8
α-D-glucopyranosyl-(1->3)-α-D-glucopyranosyl-(1->4)-D-glucopyranose(4)	transcript_HQ_YNLB_transcript12926/f2p0/1853	0.912635	0.0305891	{XP_010257980.1; PREDICTED: protein COBRA-like isoform X1 [Nelumbo nucifera]}	{sp|Q94KT8|COBRA_ARATH; Protein COBRA OS=Arabidopsis thaliana GN=COB PE=2 SV=1}	{nnu:104597901; - - - - -}	{NA}	{GO:0016049; cell growth; biological_process GO:0031225; anchored to membrane; cellular_component GO:0006952; defense response; biological_process GO:0003677; DNA binding; molecular_function GO:0010215; cellulose microfibril organization; biological_process}	{XM_010262235.2; PREDICTED: Nelumbo nucifera protein COBRA-like (LOC104599627), transcript variant X1, mRNA}	{PF04833:COBRA-like protein PF00960:Neocarzinostatin family}	4,5,8
α-D-glucopyranosyl-(1->3)-α-D-glucopyranosyl-(1->4)-D-glucopyranose(4)	transcript_HQ_YNLB_transcript8940/f2p0/2277	0.912612	0.0306007	{AIY24428.1; phosphate transporter [Manihot esculenta]}	{sp|Q38954|PHT21_ARATH; Inorganic phosphate transporter 2-1, chloroplastic OS=Arabidopsis thaliana GN=PHT2-1 PE=1 SV=1}	{nnu:104591491; K14640 SLC20A, PIT solute carrier family 20 (sodium-dependent phosphate transporter) - -}	{At3g26570; KOG2493 Na+/Pi symporter P Inorganic ion transport and metabolism ;}	{GO:0003677; DNA binding; molecular_function GO:0006355; regulation of transcription, DNA-dependent; biological_process GO:0005315; inorganic phosphate transmembrane transporter activity; molecular_function GO:0006817; phosphate transport; biological_process GO:0016020; membrane; cellular_component}	{KM396293.1; Manihot esculenta phosphate transporter (PT2) mRNA, complete cds}	{PF01384:Phosphate transporter family PF09339:IclR helix-turn-helix domain}	4,5,8
α-D-glucopyranosyl-(1->3)-α-D-glucopyranosyl-(1->4)-D-glucopyranose(4)	transcript_HQ_YNMLP_transcript2922/f5p0/3324	0.976397	0.00433745	{XP_010267582.1; PREDICTED: exportin-2 [Nelumbo nucifera]}	{sp|Q9ZPY7|XPO2_ARATH; Exportin-2 OS=Arabidopsis thaliana GN=CAS PE=2 SV=1}	{gra:105795866; K18423 CSE1, CAS, XPO2 exportin-2 (importin alpha re-exporter) - -}	{At2g46520; KOG1992 Nuclear export receptor CSE1/CAS (importin beta superfamily) YU Nuclear structure ; Intracellular trafficking, secretion, and vesicular transport ;}	{GO:0005515; protein binding; molecular_function GO:0008536; Ran GTPase binding; molecular_function GO:0030117; membrane coat; cellular_component GO:0016192; vesicle-mediated transport; biological_process GO:0006886; intracellular protein transport; biological_process}	{XM_010269280.2; PREDICTED: Nelumbo nucifera exportin-2 (LOC104604769), mRNA}	{PF03810:Importin-beta N-terminal domain PF03378:CAS/CSE protein, C-terminus PF01602:Adaptin N terminal region PF08506:Cse1}	4,5,8
β-D-glycero-Hex-2-ulofuranosyl-(2->1)-[β-D-glycero-hex-2-ulofuranosyl-(2->6)]-β-D-glycero-hex-2-ulofuranosyl-(2->1)-β-D-glycero-hex-2-ulofuranosyl α-D-erythro-hexopyranoside(2)	transcript_HQ_HBZL_transcript8096/f3p0/2209	-0.920703	0.026484	{XP_009622719.1; PREDICTED: asparagine synthetase [glutamine-hydrolyzing] [Nicotiana tomentosiformis]}	{sp|P31752|ASNS_ASPOF; Asparagine synthetase [glutamine-hydrolyzing] OS=Asparagus officinalis PE=2 SV=2}	{rcu:8278939; K01953 asnB, ASNS asparagine synthase (glutamine-hydrolysing) 6.3.5.4 ko00250; Metabolism; Amino acid metabolism; Alanine, aspartate and glutamate metabolism}	{At3g47340; KOG0571 Asparagine synthase (glutamine-hydrolyzing) E Amino acid transport and metabolism ;}	{GO:0006529; asparagine biosynthetic process; biological_process GO:0004066; asparagine synthase (glutamine-hydrolyzing) activity; molecular_function GO:0046872; metal ion binding; molecular_function GO:0004535; poly(A)-specific ribonuclease activity; molecular_function GO:0005737; cytoplasm; cellular_component GO:0006402; mRNA catabolic process; biological_process GO:0005634; nucleus; cellular_c…	{XM_012223732.1; PREDICTED: Jatropha curcas asparagine synthetase [glutamine-hydrolyzing] 1 (LOC105639616), mRNA}	{PF00733:Asparagine synthase PF08675:RNA binding domain}	2,5,8
α-D-glucopyranosyl-(1->3)-α-D-glucopyranosyl-(1->4)-D-glucopyranose(4)	transcript_HQ_HBZL_transcript10229/f2p0/2013	0.900263	0.0372401	{XP_010259143.1; PREDICTED: chaperone protein dnaJ 1, mitochondrial isoform X1 [Nelumbo nucifera]}	{sp|Q38813|DNAJ1_ARATH; Chaperone protein dnaJ 1, mitochondrial OS=Arabidopsis thaliana GN=ATJ1 PE=2 SV=2}	{nnu:104598665; - - - - -}	{At1g28210; KOG0715 Molecular chaperone (DnaJ superfamily) O Posttranslational modification, protein turnover, chaperones ;}	{GO:0031072; heat shock protein binding; molecular_function GO:0004674; protein serine/threonine kinase activity; molecular_function GO:0051082; unfolded protein binding; molecular_function}	{XM_010260843.2; PREDICTED: Nelumbo nucifera chaperone protein dnaJ 1, mitochondrial (LOC104598665), transcript variant X3, mRNA}	{PF08587:Ubiquitin associated domain (UBA) PF00684:DnaJ central domain}	4,5,8
α-D-glucopyranosyl-(1->3)-α-D-glucopyranosyl-(1->4)-D-glucopyranose(4)	transcript_HQ_YNLB_transcript23286/f2p0/584	0.985825	0.00202163	{XP_017240183.1; PREDICTED: probable F-box protein At1g65740 [Daucus carota subsp. sativus]}	{NA}	{pop:POPTR_0004s14250g; - - - - -}	{NA}	{NA}	{NA}	{NA}	4,5,8
β-D-glycero-Hex-2-ulofuranosyl-(2->1)-[β-D-glycero-hex-2-ulofuranosyl-(2->6)]-β-D-glycero-hex-2-ulofuranosyl-(2->1)-β-D-glycero-hex-2-ulofuranosyl α-D-erythro-hexopyranoside(2)	transcript_HQ_HBZL_transcript1816/f7p0/3330	-0.912261	0.0307836	{XP_007213701.1; hypothetical protein PRUPE_ppa000787mg [Prunus persica]}	{sp|Q9S7J8|HMA7_ARATH; Copper-transporting ATPase RAN1 OS=Arabidopsis thaliana GN=RAN1 PE=1 SV=1}	{pxb:103945180; K17686 copA, ATP7 Cu+-exporting ATPase 3.6.3.54 ko04016; Environmental Information Processing; Signal transduction; MAPK signaling pathway - plant | ko01524; Human Diseases; Drug resistance: Antineoplastic; Platinum drug resistance}	{At5g44790; KOG0207 Cation transport ATPase P Inorganic ion transport and metabolism ;}	{GO:0005506; iron ion binding; molecular_function GO:0046872; metal ion binding; molecular_function GO:0000166; nucleotide binding; molecular_function GO:0030001; metal ion transport; biological_process GO:0016226; iron-sulfur cluster assembly; biological_process GO:0051536; iron-sulfur cluster binding; molecular_function}	{XM_010262333.2; PREDICTED: Nelumbo nucifera copper-transporting ATPase RAN1 (LOC104599698), mRNA}	{PF00403:Heavy-metal-associated domain PF01106:NifU-like domain PF00122:E1-E2 ATPase}	2,5,8
β-D-glycero-Hex-2-ulofuranosyl-(2->1)-[β-D-glycero-hex-2-ulofuranosyl-(2->6)]-β-D-glycero-hex-2-ulofuranosyl-(2->1)-β-D-glycero-hex-2-ulofuranosyl α-D-erythro-hexopyranoside(2)	transcript_HQ_YNMLP_transcript1867/f2p0/3659	0.886846	0.0449084	{XP_010270930.1; PREDICTED: calmodulin-binding transcription activator 2-like isoform X1 [Nelumbo nucifera]}	{sp|Q9FY74|CMTA1_ARATH; Calmodulin-binding transcription activator 1 OS=Arabidopsis thaliana GN=CMTA1 PE=2 SV=2}	{cic:CICLE_v10004234mg; K21596 - - - -}	{At5g09410; KOG0520 Uncharacterized conserved protein, contains IPT/TIG domain S Function unknown ;}	{GO:0005634; nucleus; cellular_component GO:0005515; protein binding; molecular_function GO:0003677; DNA binding; molecular_function}	{XM_010272629.1; PREDICTED: Nelumbo nucifera calmodulin-binding transcription activator 2-like (LOC104607110), transcript variant X2, mRNA}	{PF01833:IPT/TIG domain PF00612:IQ calmodulin-binding motif PF03859:CG-1 domain}	2,5,8
α-D-glucopyranosyl-(1->3)-α-D-glucopyranosyl-(1->4)-D-glucopyranose(4)	transcript_HQ_YNLB_transcript14362/f2p0/1709	0.98044	0.00327417	{XP_010249951.1; PREDICTED: molybdate transporter 2 [Nelumbo nucifera]}	{sp|Q0WP36|MOT2_ARATH; Molybdate transporter 2 OS=Arabidopsis thaliana GN=MOT2 PE=1 SV=2}	{nnu:104592327; - - - - -}	{NA}	{GO:0015098; molybdate ion transmembrane transporter activity; molecular_function GO:0015689; molybdate ion transport; biological_process}	{XM_006427084.1; Citrus clementina hypothetical protein (CICLE_v10025542mg) mRNA, complete cds}	{PF16983:Molybdate transporter of MFS superfamily}	4,5,8
α-D-glucopyranosyl-(1->3)-α-D-glucopyranosyl-(1->4)-D-glucopyranose(4)	transcript_HQ_YNMLP_transcript4488/f4p0/3023	0.922311	0.0256889	{CBA12000.1; putative auxin response factor 3 [Illicium parviflorum]}	{sp|Q8S985|ARFO_ORYSJ; Auxin response factor 15 OS=Oryza sativa subsp. japonica GN=ARF15 PE=2 SV=1}	{egu:105043422; K14486 K14486, ARF auxin response factor - ko04075; Environmental Information Processing; Signal transduction; Plant hormone signal transduction}	{NA}	{GO:0006355; regulation of transcription, DNA-dependent; biological_process GO:0003677; DNA binding; molecular_function GO:0009725; response to hormone stimulus; biological_process GO:0005634; nucleus; cellular_component}	{XM_010262056.2; PREDICTED: Nelumbo nucifera auxin response factor 3-like (LOC104599494), mRNA}	{PF06507:Auxin response factor PF02362:B3 DNA binding domain}	4,5,8
α-D-glucopyranosyl-(1->3)-α-D-glucopyranosyl-(1->4)-D-glucopyranose(4)	transcript_HQ_SCJY_transcript11014/f2p0/1879	0.96577	0.00756314	{XP_017971042.1; PREDICTED: F-box/FBD/LRR-repeat protein At1g13570 [Theobroma cacao]}	{sp|Q9FZ70|FDL1_ARATH; F-box/FBD/LRR-repeat protein At1g13570 OS=Arabidopsis thaliana GN=At1g13570 PE=2 SV=1}	{pmum:103341980; - - - - -}	{NA}	{GO:0005515; protein binding; molecular_function GO:0008270; zinc ion binding; molecular_function}	{XM_007214882.1; Prunus persica hypothetical protein (PRUPE_ppa002897mg) mRNA, complete cds}	{PF17122:Zinc-finger PF13516:Leucine Rich repeat PF00646:F-box domain}	4,5,8
α-D-glucopyranosyl-(1->3)-α-D-glucopyranosyl-(1->4)-D-glucopyranose(4)	transcript_HQ_YNLB_transcript4149/f2p0/2885	0.979913	0.00340706	{XP_010269327.1; PREDICTED: protein CHROMATIN REMODELING 25 [Nelumbo nucifera]}	{sp|Q0PCS3|CHR25_ARATH; Protein CHROMATIN REMODELING 25 OS=Arabidopsis thaliana GN=CHR25 PE=1 SV=1}	{nnu:104606018; K10875 RAD54L, RAD54 DNA repair and recombination protein RAD54 and RAD54-like protein 3.6.4.- ko03440; Genetic Information Processing; Replication and repair; Homologous recombination}	{At3g19210; KOG0390 DNA repair protein, SNF2 family L Replication, recombination and repair ;}	{GO:0016787; hydrolase activity; molecular_function GO:0003677; DNA binding; molecular_function GO:0005524; ATP binding; molecular_function GO:0003676; nucleic acid binding; molecular_function}	{XM_010271025.2; PREDICTED: Nelumbo nucifera protein CHROMATIN REMODELING 25 (LOC104606018), mRNA}	{PF00176:SNF2 family N-terminal domain PF04851:Type III restriction enzyme, res subunit PF00270:DEAD/DEAH box helicase}	4,5,8
α-D-glucopyranosyl-(1->3)-α-D-glucopyranosyl-(1->4)-D-glucopyranose(4)	transcript_HQ_YNMLP_transcript10527/f3p0/2306	0.910708	0.0315973	{XP_002273942.1; PREDICTED: kinetochore protein ndc80 [Vitis vinifera]}	{sp|O14777|NDC80_HUMAN; Kinetochore protein NDC80 homolog OS=Homo sapiens GN=NDC80 PE=1 SV=1}	{vvi:100249714; K11547 NDC80, HEC1, TID3 kinetochore protein NDC80 - -}	{At3g54630; KOG0995 Centromere-associated protein HEC1 D Cell cycle control, cell division, chromosome partitioning ;}	{GO:0008654; phospholipid biosynthetic process; biological_process GO:0006021; inositol biosynthetic process; biological_process GO:0010508; positive regulation of autophagy; biological_process GO:0004512; inositol-3-phosphate synthase activity; molecular_function}	{NA}	{PF07994:Myo-inositol-1-phosphate synthase PF10186:Vacuolar sorting 38 and autophagy-related subunit 14}	4,5,8
α-D-glucopyranosyl-(1->3)-α-D-glucopyranosyl-(1->4)-D-glucopyranose(4)	transcript_HQ_YNMLP_transcript4707/f3p0/2988	0.905465	0.0343926	{XP_010273939.1; PREDICTED: mechanosensitive ion channel protein 10 isoform X1 [Nelumbo nucifera]}	{sp|Q9LYG9|MSL10_ARATH; Mechanosensitive ion channel protein 10 OS=Arabidopsis thaliana GN=MSL10 PE=1 SV=1}	{pper:PRUPE_ppa001792mg; - - - - -}	{At5g12080; KOG4629 Predicted mechanosensitive ion channel M Cell wall/membrane/envelope biogenesis ;}	{GO:0016020; membrane; cellular_component GO:0055085; transmembrane transport; biological_process}	{XM_010275639.2; PREDICTED: Nelumbo nucifera mechanosensitive ion channel protein 10 (LOC104609347), transcript variant X3, mRNA}	{PF00924:Mechanosensitive ion channel}	4,5,8
β-D-glycero-Hex-2-ulofuranosyl-(2->1)-[β-D-glycero-hex-2-ulofuranosyl-(2->6)]-β-D-glycero-hex-2-ulofuranosyl-(2->1)-β-D-glycero-hex-2-ulofuranosyl α-D-erythro-hexopyranoside(2)	transcript_HQ_HBZL_transcript5146/f3p0/2550	-0.916357	0.0286718	{XP_010266272.1; PREDICTED: plant intracellular Ras-group-related LRR protein 4-like [Nelumbo nucifera]}	{sp|Q9SVW8|PIRL4_ARATH; Plant intracellular Ras-group-related LRR protein 4 OS=Arabidopsis thaliana GN=PIRL4 PE=1 SV=1}	{pda:103713946; - - - - -}	{At4g35470; KOG0619 FOG: Leucine rich repeat R General function prediction only ;}	{GO:0005515; protein binding; molecular_function}	{XM_010272238.2; PREDICTED: Nelumbo nucifera plant intracellular Ras-group-related LRR protein 4-like (LOC104606842), transcript variant X3, mRNA}	{PF00560:Leucine Rich Repeat PF13516:Leucine Rich repeat PF13855:Leucine rich repeat}	2,5,8
α-D-glucopyranosyl-(1->3)-α-D-glucopyranosyl-(1->4)-D-glucopyranose(4)	transcript_HQ_YNMLP_transcript1303/f2p0/3895	0.985188	0.00215907	{XP_010252517.1; PREDICTED: aspartate carbamoyltransferase 1, chloroplastic-like [Nelumbo nucifera]}	{sp|Q43064|PYRB3_PEA; Aspartate carbamoyltransferase 3, chloroplastic OS=Pisum sativum GN=PYRB3 PE=2 SV=1}	{nnu:104594081; K00609 pyrB, PYR2 aspartate carbamoyltransferase catalytic subunit 2.1.3.2 ko00240; Metabolism; Nucleotide metabolism; Pyrimidine metabolism | ko00250; Metabolism; Amino acid metabolism; Alanine, aspartate and glutamate metabolism}	{At3g20330; KOG0370 Multifunctional pyrimidine synthesis protein CAD (includes carbamoyl-phophate synthetase, aspartate transcarbamylase, and glutamine amidotransferase) R General function prediction only ;}	{GO:0016743; carboxyl- or carbamoyltransferase activity; molecular_function GO:0006520; cellular amino acid metabolic process; biological_process GO:0016597; amino acid binding; molecular_function}	{XM_016629736.1; PREDICTED: Nicotiana tabacum aspartate carbamoyltransferase 1, chloroplastic-like (LOC107805660), mRNA}	{PF00185:Aspartate/ornithine carbamoyltransferase, Asp/Orn binding domain PF02729:Aspartate/ornithine carbamoyltransferase, carbamoyl-P binding domain}	4,5,8
β-D-glycero-Hex-2-ulofuranosyl-(2->1)-[β-D-glycero-hex-2-ulofuranosyl-(2->6)]-β-D-glycero-hex-2-ulofuranosyl-(2->1)-β-D-glycero-hex-2-ulofuranosyl α-D-erythro-hexopyranoside(2)	transcript_HQ_SCJY_transcript10028/f2p0/1953	-0.922388	0.0256512	{XP_018806492.1; PREDICTED: D-xylose-proton symporter-like 2 [Juglans regia]}	{sp|Q6AWX0|XYLL2_ARATH; D-xylose-proton symporter-like 2 OS=Arabidopsis thaliana GN=At5g17010 PE=1 SV=1}	{pxb:103943298; - - - - -}	{At5g59250; KOG0254 Predicted transporter (major facilitator superfamily) R General function prediction only ;}	{GO:0005215; NA GO:0016021; integral to membrane; cellular_component GO:0016020; membrane; cellular_component GO:0006810; transport; biological_process GO:0022857; transmembrane transporter activity; molecular_function GO:0055085; transmembrane transport; biological_process}	{XM_018121635.1; PREDICTED: Theobroma cacao D-xylose-proton symporter-like 2 (LOC18599502), mRNA}	{PF03137:Organic Anion Transporter Polypeptide (OATP) family PF06609:Fungal trichothecene efflux pump (TRI12) PF07690:Major Facilitator Superfamily PF00083:Sugar (and other) transporter}	2,5,8
β-D-glycero-Hex-2-ulofuranosyl-(2->1)-[β-D-glycero-hex-2-ulofuranosyl-(2->6)]-β-D-glycero-hex-2-ulofuranosyl-(2->1)-β-D-glycero-hex-2-ulofuranosyl α-D-erythro-hexopyranoside(2)	transcript_HQ_YNLB_transcript14579/f2p0/1687	-0.928805	0.0225587	{XP_015892687.1; PREDICTED: cyclase-associated protein 1-like [Ziziphus jujuba]}	{sp|O65902|ACAP1_ARATH; Cyclase-associated protein 1 OS=Arabidopsis thaliana GN=CAP1 PE=2 SV=1}	{spen:107008896; K17261 CAP1_2, SRV2 adenylyl cyclase-associated protein - -; spen:107008896; K17261 CAP1_2, SRV2 adenylyl cyclase-associated protein - -}	{At4g34490; KOG2675 Adenylate cyclase-associated protein (CAP/Srv2p) ZT Cytoskeleton ; Signal transduction mechanisms ;}	{GO:0007010; cytoskeleton organization; biological_process GO:0003779; actin binding; molecular_function}	{XM_010265384.2; PREDICTED: Nelumbo nucifera cyclase-associated protein 1-like (LOC104601881), mRNA}	{PF08603:Adenylate cyclase associated (CAP) C terminal PF01213:Adenylate cyclase associated (CAP) N terminal}	2,5,8
α-D-glucopyranosyl-(1->3)-α-D-glucopyranosyl-(1->4)-D-glucopyranose(4)	transcript_HQ_YNLB_transcript822/f2p0/4148	0.911387	0.0312406	{XP_010264501.1; PREDICTED: protein SCAR2-like [Nelumbo nucifera]}	{sp|Q5XPJ9|SCAR2_ARATH; Protein SCAR2 OS=Arabidopsis thaliana GN=SCAR2 PE=1 SV=1}	{nnu:104597241; - - - - -}	{NA}	{NA}	{XM_006481071.2; PREDICTED: Citrus sinensis protein SCAR2 (LOC102611298), mRNA}	{NA}	4,5,8
β-D-glycero-Hex-2-ulofuranosyl-(2->1)-[β-D-glycero-hex-2-ulofuranosyl-(2->6)]-β-D-glycero-hex-2-ulofuranosyl-(2->1)-β-D-glycero-hex-2-ulofuranosyl α-D-erythro-hexopyranoside(2)	transcript_HQ_SCEZ_transcript11647/f2p0/1874	0.894278	0.0406043	{XP_010270543.1; PREDICTED: CMP-sialic acid transporter 2 [Nelumbo nucifera]}	{sp|B8B7Q4|CSTR2_ORYSI; CMP-sialic acid transporter 2 OS=Oryza sativa subsp. indica GN=CSTLP2 PE=3 SV=1}	{rcu:8282453; K15272 SLC35A1_2_3 solute carrier family 35 (UDP-sugar transporter), member A1/2/3 - -}	{At5g41760; KOG2234 Predicted UDP-galactose transporter G Carbohydrate transport and metabolism ;}	{GO:0000139; Golgi membrane; cellular_component GO:0055085; transmembrane transport; biological_process GO:0008643; carbohydrate transport; biological_process GO:0005351; sugar:hydrogen symporter activity; molecular_function GO:0016021; integral to membrane; cellular_component GO:0016020; membrane; cellular_component}	{XM_010272241.2; PREDICTED: Nelumbo nucifera CMP-sialic acid transporter 2 (LOC104606844), mRNA}	{PF08449:UAA transporter family PF04142:Nucleotide-sugar transporter PF00892:EamA-like transporter family}	2,5,8
β-D-glycero-Hex-2-ulofuranosyl-(2->1)-[β-D-glycero-hex-2-ulofuranosyl-(2->6)]-β-D-glycero-hex-2-ulofuranosyl-(2->1)-β-D-glycero-hex-2-ulofuranosyl α-D-erythro-hexopyranoside(2)	transcript_HQ_YNMLP_transcript3557/f2p0/3180	-0.91812	0.0277773	{XP_002279721.1; PREDICTED: ATP-dependent zinc metalloprotease FTSH 7, chloroplastic [Vitis vinifera]}	{sp|Q9FIM2|FTSH9_ARATH; ATP-dependent zinc metalloprotease FTSH 9, chloroplastic OS=Arabidopsis thaliana GN=FTSH9 PE=2 SV=1}	{gra:105788726; K03798 ftsH, hflB cell division protease FtsH 3.4.24.- -}	{At5g58870; KOG0731 AAA+-type ATPase containing the peptidase M41 domain O Posttranslational modification, protein turnover, chaperones ;}	{GO:0003678; DNA helicase activity; molecular_function GO:0016887; ATPase activity; molecular_function GO:0008270; zinc ion binding; molecular_function GO:0006508; proteolysis; biological_process GO:0016021; integral to membrane; cellular_component GO:0006310; DNA recombination; biological_process GO:0006281; DNA repair; biological_process GO:0009378; four-way junction helicase activity; molecula…	{XM_002279685.3; PREDICTED: Vitis vinifera ATP-dependent zinc metalloprotease FTSH 7, chloroplastic (LOC100265577), mRNA}	{PF01434:Peptidase family M41 PF06480:FtsH Extracellular PF05496:Holliday junction DNA helicase ruvB N-terminus PF01695:IstB-like ATP binding protein PF00004:ATPase family associated with various cellular activities (AAA) PF07724:AAA domain (Cdc48 subfamily) PF06068:TIP49 C-terminus PF07728:AAA domain (dynein-related subfamily)}	2,5,8
α-D-glucopyranosyl-(1->3)-α-D-glucopyranosyl-(1->4)-D-glucopyranose(4)	transcript_HQ_YNLB_transcript17815/f3p0/1238	0.940875	0.0171043	{XP_010273292.1; PREDICTED: pyrroline-5-carboxylate reductase [Nelumbo nucifera]}	{sp|O04016|P5CR_ACTCH; Pyrroline-5-carboxylate reductase OS=Actinidia chinensis PE=2 SV=1}	{nta:107814177; - - - - -}	{At5g14800; KOG3124 Pyrroline-5-carboxylate reductase E Amino acid transport and metabolism ;}	{GO:0008977; prephenate dehydrogenase activity; molecular_function GO:0016491; oxidoreductase activity; molecular_function GO:0016616; oxidoreductase activity, acting on the CH-OH group of donors, NAD or NADP as acceptor; molecular_function GO:0003857; 3-hydroxyacyl-CoA dehydrogenase activity; molecular_function GO:0004616; phosphogluconate dehydrogenase (decarboxylating) activity; molecular_func…	{NA}	{PF03435:Saccharopine dehydrogenase NADP binding domain PF01210:NAD-dependent glycerol-3-phosphate dehydrogenase N-terminus PF03446:NAD binding domain of 6-phosphogluconate dehydrogenase PF01408:Oxidoreductase family, NAD-binding Rossmann fold PF02153:Prephenate dehydrogenase PF01113:Dihydrodipicolinate reductase, N-terminus PF02558:Ketopantoate reductase PanE/ApbA PF02737:3-hydroxyacyl-CoA dehyd…	4,5,8
α-D-glucopyranosyl-(1->3)-α-D-glucopyranosyl-(1->4)-D-glucopyranose(4)	transcript_HQ_YNMLP_transcript7958/f2p0/2576	0.99849	7.04209e-05	{XP_010267455.1; PREDICTED: GTPase-activating protein gyp7 [Nelumbo nucifera]}	{sp|P09379|GYP7_YARLI; GTPase-activating protein GYP7 OS=Yarrowia lipolytica (strain CLIB 122 / E 150) GN=GYP7 PE=3 SV=2}	{nnu:104593419; - - - - -}	{At3g49350; KOG2197 Ypt/Rab-specific GTPase-activating protein GYP7 and related proteins T Signal transduction mechanisms ;}	{NA}	{XR_001969484.1; PREDICTED: Nicotiana tomentosiformis small G protein signaling modulator 2-like (LOC104097342), transcript variant X2, misc_RNA}	{NA}	4,5,8
β-D-glycero-Hex-2-ulofuranosyl-(2->1)-[β-D-glycero-hex-2-ulofuranosyl-(2->6)]-β-D-glycero-hex-2-ulofuranosyl-(2->1)-β-D-glycero-hex-2-ulofuranosyl α-D-erythro-hexopyranoside(2)	transcript_HQ_YNLB_transcript917/f2p0/3997	0.948861	0.0137753	{XP_010251844.1; PREDICTED: exportin-7 isoform X2 [Nelumbo nucifera]}	{sp|Q5ZLT0|XPO7_CHICK; Exportin-7 OS=Gallus gallus GN=XPO7 PE=2 SV=1}	{nnu:104593606; K18460 XPO7, EXP7 exportin-7 - -}	{At5g06120; KOG1410 Nuclear transport receptor RanBP16 (importin beta superfamily) YU Nuclear structure ; Intracellular trafficking, secretion, and vesicular transport ;}	{GO:0008536; Ran GTPase binding; molecular_function GO:0006886; intracellular protein transport; biological_process}	{XM_010253542.2; PREDICTED: Nelumbo nucifera exportin-7 (LOC104593606), transcript variant X4, mRNA}	{PF03810:Importin-beta N-terminal domain}	2,5,8
β-D-glycero-Hex-2-ulofuranosyl-(2->1)-[β-D-glycero-hex-2-ulofuranosyl-(2->6)]-β-D-glycero-hex-2-ulofuranosyl-(2->1)-β-D-glycero-hex-2-ulofuranosyl α-D-erythro-hexopyranoside(2)	transcript_HQ_SCEZ_transcript951/f2p0/3712	-0.894096	0.0407081	{XP_010256855.1; PREDICTED: pumilio homolog 2-like [Nelumbo nucifera]}	{sp|Q9ZW06|PUM2_ARATH; Pumilio homolog 2 OS=Arabidopsis thaliana GN=APUM2 PE=1 SV=1}	{nnu:104597143; K17943 PUM pumilio RNA-binding family - -}	{At2g29190; KOG1488 Translational repressor Pumilio/PUF3 and related RNA-binding proteins (Puf superfamily) J Translation, ribosomal structure and biogenesis ;}	{GO:0003723; RNA binding; molecular_function}	{XM_010258556.2; PREDICTED: Nelumbo nucifera pumilio homolog 2-like (LOC104597143), transcript variant X3, mRNA}	{PF08144:CPL (NUC119) domain PF00806:Pumilio-family RNA binding repeat}	2,5,8
α-D-glucopyranosyl-(1->3)-α-D-glucopyranosyl-(1->4)-D-glucopyranose(4)	transcript_HQ_YNMLP_transcript26018/f2p0/579	0.952707	0.0122582	{XP_007200643.1; hypothetical protein PRUPE_ppa013901mg [Prunus persica]}	{sp|Q9C6K5|LSM3B_ARATH; Sm-like protein LSM3B OS=Arabidopsis thaliana GN=LSM3B PE=1 SV=1}	{pper:PRUPE_ppa013901mg; K12622 LSM3 U6 snRNA-associated Sm-like protein LSm3 - ko03040; Genetic Information Processing; Transcription; Spliceosome | ko03018; Genetic Information Processing; Folding, sorting and degradation; RNA degradation}	{At1g76860; KOG3460 Small nuclear ribonucleoprotein (snRNP) LSM3 A RNA processing and modification ;}	{NA}	{XR_735571.2; PREDICTED: Nelumbo nucifera sm-like protein LSM3A (LOC104599890), transcript variant X2, misc_RNA}	{NA}	4,5,8
α-D-glucopyranosyl-(1->3)-α-D-glucopyranosyl-(1->4)-D-glucopyranose(4)	transcript_HQ_YNLB_transcript17183/f2p0/1337	0.938849	0.017985	{XP_020097038.1; dehydrogenase/reductase SDR family member 12 isoform X1 [Ananas comosus]}	{sp|A6QP05|DHR12_BOVIN; Dehydrogenase/reductase SDR family member 12 OS=Bos taurus GN=DHRS12 PE=2 SV=1}	{pper:PRUPE_ppa007847mg; K11168 DHRS12 dehydrogenase/reductase SDR family member 12 1.1.-.- -}	{At4g09750; KOG1208 Dehydrogenases with different specificities (related to short-chain alcohol dehydrogenases) Q Secondary metabolites biosynthesis, transport and catabolism ;}	{GO:0003824; NA GO:0050662; coenzyme binding; molecular_function}	{XM_012230642.1; PREDICTED: Jatropha curcas dehydrogenase/reductase SDR family member 12 (LOC105645124), mRNA}	{PF01370:NAD dependent epimerase/dehydratase family}	4,5,8
α-D-glucopyranosyl-(1->3)-α-D-glucopyranosyl-(1->4)-D-glucopyranose(4)	transcript_HQ_YNLB_transcript17646/f5p0/1257	0.920687	0.026492	{XP_010255804.1; PREDICTED: 39S ribosomal protein L45, mitochondrial isoform X1 [Nelumbo nucifera]}	{sp|Q616T6|RM45_CAEBR; Probable 39S ribosomal protein L45, mitochondrial OS=Caenorhabditis briggsae GN=mrpl-45 PE=3 SV=1}	{nnu:104596382; K17426 MRPL45 large subunit ribosomal protein L45 - -}	{At5g27390; KOG4599 Putative mitochondrial/chloroplast ribosomal protein L45 J Translation, ribosomal structure and biogenesis ;}	{GO:0032979; protein insertion into mitochondrial membrane from inner side; biological_process GO:0005743; mitochondrial inner membrane; cellular_component}	{XM_007030727.2; PREDICTED: Theobroma cacao 39S ribosomal protein L45, mitochondrial (LOC18600350), mRNA}	{PF07961:MBA1-like protein}	4,5,8
β-D-glycero-Hex-2-ulofuranosyl-(2->1)-[β-D-glycero-hex-2-ulofuranosyl-(2->6)]-β-D-glycero-hex-2-ulofuranosyl-(2->1)-β-D-glycero-hex-2-ulofuranosyl α-D-erythro-hexopyranoside(2)	transcript_HQ_YNMLP_transcript24510/f2p0/723	-0.923077	0.0253127	{XP_002529168.2; PREDICTED: mitochondrial fission 1 protein A [Ricinus communis]}	{sp|Q9M1J1|FIS1A_ARATH; Mitochondrial fission 1 protein A OS=Arabidopsis thaliana GN=FIS1A PE=1 SV=1}	{rcu:8260418; K17969 FIS1, TTC11, MDV2 mitochondrial fission 1 protein - ko04139; Cellular Processes; Transport and catabolism; Mitophagy - yeast}	{At3g57090; KOG3364 Membrane protein involved in organellar division M Cell wall/membrane/envelope biogenesis ;}	{GO:0005515; protein binding; molecular_function}	{XM_010274919.2; PREDICTED: Nelumbo nucifera mitochondrial fission 1 protein A-like (LOC104608825), mRNA}	{PF13371:Tetratricopeptide repeat}	2,5,8
α-D-glucopyranosyl-(1->3)-α-D-glucopyranosyl-(1->4)-D-glucopyranose(4)	transcript_HQ_YNLB_transcript14433/f2p0/1706	0.994769	0.000453743	{EOY07582.1; ARF-GAP domain 7 isoform 1 [Theobroma cacao]}	{sp|O80925|AGD7_ARATH; ADP-ribosylation factor GTPase-activating protein AGD7 OS=Arabidopsis thaliana GN=AGD7 PE=1 SV=1}	{nnu:104594589; K12492 ARFGAP1 ADP-ribosylation factor GTPase-activating protein 1 - ko04144; Cellular Processes; Transport and catabolism; Endocytosis}	{At2g37550; KOG0704 ADP-ribosylation factor GTPase activator TUZ Signal transduction mechanisms ; Intracellular trafficking, secretion, and vesicular transport ; Cytoskeleton ;}	{GO:0005096; GTPase activator activity; molecular_function}	{AC225085.1; Oryza officinalis clone OO__Ba0086E12, complete sequence}	{PF01412:Putative GTPase activating protein for Arf}	4,5,8
β-D-glycero-Hex-2-ulofuranosyl-(2->1)-[β-D-glycero-hex-2-ulofuranosyl-(2->6)]-β-D-glycero-hex-2-ulofuranosyl-(2->1)-β-D-glycero-hex-2-ulofuranosyl α-D-erythro-hexopyranoside(2)	transcript_HQ_YNLB_transcript5029/f2p0/2764	0.88545	0.0457319	{CBI31609.3; unnamed protein product, partial [Vitis vinifera]}	{sp|B3H5K9|NEDD1_ARATH; Protein NEDD1 OS=Arabidopsis thaliana GN=NEDD1 PE=2 SV=1}	{cmo:103485531; K16547 NEDD1 protein NEDD1 - -}	{At5g05970; KOG4378 Nuclear protein COP1 T Signal transduction mechanisms ;}	{GO:0043565; sequence-specific DNA binding; molecular_function GO:0009523; photosystem II; cellular_component GO:0015979; photosynthesis; biological_process GO:0009539; photosystem II reaction center; cellular_component GO:0003700; sequence-specific DNA binding transcription factor activity; molecular_function GO:0005515; protein binding; molecular_function GO:0006355; regulation of transcription…	{XM_010264342.2; PREDICTED: Nelumbo nucifera protein NEDD1 (LOC104601128), mRNA}	{PF02533:Photosystem II 4 kDa reaction centre component PF07716:Basic region leucine zipper PF00400:WD domain, G-beta repeat}	2,5,8
α-D-glucopyranosyl-(1->3)-α-D-glucopyranosyl-(1->4)-D-glucopyranose(4)	transcript_HQ_YNLB_transcript5001/f2p0/2740	0.996924	0.00020465	{CBI31609.3; unnamed protein product, partial [Vitis vinifera]}	{sp|B3H5K9|NEDD1_ARATH; Protein NEDD1 OS=Arabidopsis thaliana GN=NEDD1 PE=2 SV=1}	{cmo:103485531; K16547 NEDD1 protein NEDD1 - -}	{At5g05970; KOG4378 Nuclear protein COP1 T Signal transduction mechanisms ;}	{GO:0015979; photosynthesis; biological_process GO:0009539; photosystem II reaction center; cellular_component GO:0003700; sequence-specific DNA binding transcription factor activity; molecular_function GO:0005515; protein binding; molecular_function GO:0006355; regulation of transcription, DNA-dependent; biological_process GO:0043565; sequence-specific DNA binding; molecular_function GO:0009523;…	{XM_002277631.4; PREDICTED: Vitis vinifera protein NEDD1 (LOC100246247), mRNA}	{PF00400:WD domain, G-beta repeat PF07716:Basic region leucine zipper PF02533:Photosystem II 4 kDa reaction centre component}	4,5,8
β-D-glycero-Hex-2-ulofuranosyl-(2->1)-[β-D-glycero-hex-2-ulofuranosyl-(2->6)]-β-D-glycero-hex-2-ulofuranosyl-(2->1)-β-D-glycero-hex-2-ulofuranosyl α-D-erythro-hexopyranoside(2)	transcript_HQ_SCEZ_transcript14663/f2p0/1673	0.907727	0.0331776	{XP_010261503.1; PREDICTED: protein trichome birefringence-like 23 [Nelumbo nucifera]}	{sp|O82509|TBL23_ARATH; Protein trichome birefringence-like 23 OS=Arabidopsis thaliana GN=TBL23 PE=2 SV=1}	{pop:POPTR_0002s16980g; - - - - -}	{NA}	{NA}	{XR_001804204.1; PREDICTED: Daucus carota subsp. sativus uncharacterized LOC108206998 (LOC108206998), transcript variant X2, misc_RNA}	{NA}	2,5,8
β-D-glycero-Hex-2-ulofuranosyl-(2->1)-[β-D-glycero-hex-2-ulofuranosyl-(2->6)]-β-D-glycero-hex-2-ulofuranosyl-(2->1)-β-D-glycero-hex-2-ulofuranosyl α-D-erythro-hexopyranoside(2)	transcript_HQ_SCEZ_transcript5341/f2p0/2503	-0.87997	0.0490108	{XP_010279602.1; PREDICTED: probable 1-deoxy-D-xylulose-5-phosphate synthase, chloroplastic [Nelumbo nucifera]}	{sp|O78328|DXS_CAPAN; Probable 1-deoxy-D-xylulose-5-phosphate synthase, chloroplastic OS=Capsicum annuum GN=TKT2 PE=2 SV=1}	{nnu:104613474; K01662 dxs 1-deoxy-D-xylulose-5-phosphate synthase 2.2.1.7 ko00730; Metabolism; Metabolism of cofactors and vitamins; Thiamine metabolism | ko00900; Metabolism; Metabolism of terpenoids and polyketides; Terpenoid backbone biosynthesis}	{At4g15560; KOG0523 Transketolase G Carbohydrate transport and metabolism ;}	{GO:0016114; terpenoid biosynthetic process; biological_process GO:0016624; oxidoreductase activity, acting on the aldehyde or oxo group of donors, disulfide as acceptor; molecular_function GO:0008661; 1-deoxy-D-xylulose-5-phosphate synthase activity; molecular_function GO:0030976; thiamine pyrophosphate binding; molecular_function GO:0003824; NA GO:0008152; NA}	{XM_010281300.2; PREDICTED: Nelumbo nucifera probable 1-deoxy-D-xylulose-5-phosphate synthase, chloroplastic (LOC104613474), mRNA}	{PF00676:Dehydrogenase E1 component PF02775:Thiamine pyrophosphate enzyme, C-terminal TPP binding domain PF13292:1-deoxy-D-xylulose-5-phosphate synthase}	2,5,8
α-D-glucopyranosyl-(1->3)-α-D-glucopyranosyl-(1->4)-D-glucopyranose(4)	transcript_HQ_HBZL_transcript28875/f2p0/275	-0.883628	0.046814	{XP_010104773.1; hypothetical protein L484_018826 [Morus notabilis]}	{sp|Q3BAI2|YCX91_PHAAO; Uncharacterized protein ORF91 OS=Phalaenopsis aphrodite subsp. formosana PE=4 SV=1}	{NA}	{NA}	{NA}	{KU318669.1; Aconitum coreanum voucher YSG-KIOM-2015-31 chloroplast, complete genome}	{NA}	4,5,8
α-D-glucopyranosyl-(1->3)-α-D-glucopyranosyl-(1->4)-D-glucopyranose(4)	transcript_HQ_YNMLP_transcript18546/f2p0/1382	0.87909	0.049544	{XP_010275055.1; PREDICTED: solanesyl diphosphate synthase 3, chloroplastic/mitochondrial isoform X1 [Nelumbo nucifera]}	{sp|Q653T6|SPS1_ORYSJ; Solanesyl-diphosphate synthase 1, mitochondrial OS=Oryza sativa subsp. japonica GN=SPS1 PE=1 SV=1}	{pda:103705621; K14066 GPS geranyl diphosphate synthase 2.5.1.1 ko00900; Metabolism; Metabolism of terpenoids and polyketides; Terpenoid backbone biosynthesis}	{At2g34630; KOG0776 Geranylgeranyl pyrophosphate synthase/Polyprenyl synthetase H Coenzyme transport and metabolism ;}	{GO:0009234; menaquinone biosynthetic process; biological_process GO:0008299; isoprenoid biosynthetic process; biological_process}	{KF614970.1; Nigella sativa geranyl diphosphate synthase (GPPS) mRNA, partial cds}	{PF07307:Heptaprenyl diphosphate synthase (HEPPP synthase) subunit 1 PF00348:Polyprenyl synthetase}	4,5,8
isocitric acid/citric acid(9a/b)	transcript_HQ_YNLB_transcript9413/f6p0/2232	-0.894427	0.0405193	{KDO54375.1; hypothetical protein CISIN_1g006872mg [Citrus sinensis]}	{sp|A7LXU3|BGH3B_BACO1; Beta-glucosidase BoGH3B OS=Bacteroides ovatus (strain ATCC 8483 / DSM 1896 / JCM 5824 / NCTC 11153) GN=BACOVA_02659 PE=1 SV=1}	{cic:CICLE_v10028018mg; K05349 bglX beta-glucosidase 3.2.1.21 ko00500; Metabolism; Carbohydrate metabolism; Starch and sucrose metabolism | ko00460; Metabolism; Metabolism of other amino acids; Cyanoamino acid metabolism | ko00940; Metabolism; Biosynthesis of other secondary metabolites; Phenylpropanoid biosynthesis}	{NA}	{GO:0005975; carbohydrate metabolic process; biological_process GO:0004553; hydrolase activity, hydrolyzing O-glycosyl compounds; molecular_function}	{XM_018996274.1; PREDICTED: Juglans regia beta-glucosidase BoGH3B-like (LOC109013987), mRNA}	{PF01915:Glycosyl hydrolase family 3 C-terminal domain PF00933:Glycosyl hydrolase family 3 N terminal domain}	9a/b,10a/b	G
isocitric acid/citric acid(9a/b)	transcript_HQ_YNLB_transcript8907/f4p0/2306	-0.894427	0.0405193	{XP_010266669.1; PREDICTED: endoglucanase 9-like [Nelumbo nucifera]}	{sp|Q38890|GUN25_ARATH; Endoglucanase 25 OS=Arabidopsis thaliana GN=KOR PE=1 SV=1}	{vvi:109123547; - - - - -}	{NA}	{GO:0004553; hydrolase activity, hydrolyzing O-glycosyl compounds; molecular_function GO:0005975; carbohydrate metabolic process; biological_process}	{XM_010268367.2; PREDICTED: Nelumbo nucifera endoglucanase 9-like (LOC104604131), mRNA}	{PF00759:Glycosyl hydrolase family 9}	9a/b,10a/b
isocitric acid/citric acid(9a/b)	transcript_HQ_YNMLP_transcript3009/f2p0/3375	-0.9	0.0373861	{CCF23025.1; auxin influx carrier protein [Mangifera indica]}	{sp|Q9FEL7|LAX2_MEDTR; Auxin transporter-like protein 2 OS=Medicago truncatula GN=LAX2 PE=2 SV=1}	{gra:105786542; K13946 AUX1, LAX auxin influx carrier (AUX1 LAX family) - ko04075; Environmental Information Processing; Signal transduction; Plant hormone signal transduction}	{At2g38120; KOG1303 Amino acid transporters E Amino acid transport and metabolism ;}	{NA}	{XM_019370972.1; PREDICTED: Nicotiana attenuata auxin transporter-like protein 4 (LOC109207973), mRNA}	{NA}	9a/b,10a/b
isocitric acid/citric acid(9a/b)	transcript_HQ_YNLB_transcript18819/f2p0/1099	-0.894427	0.0405193	{XP_002269174.2; PREDICTED: uncharacterized protein LOC100263584 [Vitis vinifera]}	{NA}	{vvi:100263584; - - - - -}	{NA}	{GO:0055114; oxidation-reduction process; biological_process GO:0016714; oxidoreductase activity, acting on paired donors, with incorporation or reduction of molecular oxygen, reduced pteridine as one donor, and incorporation of one atom of oxygen; molecular_function}	{NA}	{PF00351:Biopterin-dependent aromatic amino acid hydroxylase}	9a/b,10a/b
isocitric acid/citric acid(9a/b)	transcript_HQ_YNMLP_transcript3520/f3p0/3287	-0.974679	0.00481823	{GAV67068.1; Alpha-amylase domain-containing protein/Alpha-amylase_C domain-containing protein/CBM_48 domain-containing protein [Cephalotus follicularis]}	{sp|Q41058|GLGB1_PEA; 1,4-alpha-glucan-branching enzyme 1, chloroplastic/amyloplastic OS=Pisum sativum GN=SBEI PE=1 SV=1}	{pper:PRUPE_ppa001312mg; K00700 GBE1, glgB 1,4-alpha-glucan branching enzyme 2.4.1.18 ko00500; Metabolism; Carbohydrate metabolism; Starch and sucrose metabolism}	{At5g03650; KOG0470 1,4-alpha-glucan branching enzyme/starch branching enzyme II G Carbohydrate transport and metabolism ;}	{GO:0004553; hydrolase activity, hydrolyzing O-glycosyl compounds; molecular_function GO:0043169; cation binding; molecular_function GO:0003824; NA GO:0005975; carbohydrate metabolic process; biological_process}	{XR_002022160.1; PREDICTED: Nelumbo nucifera 1,4-alpha-glucan-branching enzyme 1, chloroplastic/amyloplastic (LOC104587877), transcript variant X2, misc_RNA}	{PF02922:Carbohydrate-binding module 48 (Isoamylase N-terminal domain) PF02806:Alpha amylase, C-terminal all-beta domain PF00128:Alpha amylase, catalytic domain}	9a/b,10a/b
isocitric acid/citric acid(9a/b)	transcript_HQ_YNMLP_transcript2964/f2p0/3304	-0.894427	0.0405193	{XP_010256798.1; PREDICTED: transcription factor bHLH155-like isoform X1 [Nelumbo nucifera]}	{sp|Q9XIN0|LHW_ARATH; Transcription factor LHW OS=Arabidopsis thaliana GN=LHW PE=1 SV=1}	{nnu:104597098; - - - - -}	{NA}	{NA}	{XM_008808708.1; PREDICTED: Phoenix dactylifera transcription factor bHLH155-like (LOC103719457), transcript variant X2, mRNA}	{NA}	9a/b,10a/b
isocitric acid/citric acid(9a/b)	transcript_HQ_YNMLP_transcript8408/f2p0/2550	-0.894427	0.0405193	{KZM96430.1; hypothetical protein DCAR_019672 [Daucus carota subsp. sativus]}	{sp|O64883|BGL26_ARATH; Beta-glucosidase 26, peroxisomal OS=Arabidopsis thaliana GN=BGLU26 PE=1 SV=1}	{cit:102611435; - - - - -}	{NA}	{GO:0003682; chromatin binding; molecular_function}	{NA}	{PF16719:SAWADEE domain}	9a/b,10a/b
isocitric acid/citric acid(9a/b)	transcript_HQ_YNLB_transcript10434/f3p0/2103	-0.894427	0.0405193	{XP_010249515.1; PREDICTED: beta-glucosidase 13-like isoform X1 [Nelumbo nucifera]}	{sp|Q42707|F26G_CHESP; Furostanol glycoside 26-O-beta-glucosidase OS=Cheilocostus speciosus GN=F26G PE=1 SV=1}	{nnu:104592063; K01188 E3.2.1.21 beta-glucosidase 3.2.1.21 ko00500; Metabolism; Carbohydrate metabolism; Starch and sucrose metabolism | ko00460; Metabolism; Metabolism of other amino acids; Cyanoamino acid metabolism | ko00940; Metabolism; Biosynthesis of other secondary metabolites; Phenylpropanoid biosynthesis}	{At2g44450; KOG0626 Beta-glucosidase, lactase phlorizinhydrolase, and related proteins G Carbohydrate transport and metabolism ;}	{GO:0004553; hydrolase activity, hydrolyzing O-glycosyl compounds; molecular_function GO:0005975; carbohydrate metabolic process; biological_process}	{XM_008365105.1; PREDICTED: Malus x domestica beta-glucosidase 24 (LOC103427029), mRNA}	{PF00232:Glycosyl hydrolase family 1}	9a/b,10a/b
isocitric acid/citric acid(9a/b)	transcript_HQ_SCEZ_transcript7061/f2p0/2272	-1	0	{XP_010254014.1; PREDICTED: probable glycosyltransferase At3g07620 [Nelumbo nucifera]}	{sp|Q9FFN2|GLYT3_ARATH; Probable glycosyltransferase At5g03795 OS=Arabidopsis thaliana GN=At5g03795 PE=3 SV=2}	{nnu:104595125; - - - - -}	{At5g19670; KOG1021 Acetylglucosaminyltransferase EXT1/exostosin 1 GMW Carbohydrate transport and metabolism ; Cell wall/membrane/envelope biogenesis ; Extracellular structures ;}	{NA}	{NA}	{NA}	9a/b,10a/b
isocitric acid/citric acid(9a/b)	transcript_HQ_YNMLP_transcript2057/f3p0/3589	-0.894427	0.0405193	{XP_017646614.1; PREDICTED: LOW QUALITY PROTEIN: DNA-damage-repair/toleration protein DRT111, chloroplastic [Gossypium arboreum]}	{sp|P42698|DR111_ARATH; DNA-damage-repair/toleration protein DRT111, chloroplastic OS=Arabidopsis thaliana GN=DRT111 PE=1 SV=2}	{mdm:103446123; K12840 RBM17, SPF45 splicing factor 45 - ko03040; Genetic Information Processing; Transcription; Spliceosome}	{At1g30480; KOG1996 mRNA splicing factor A RNA processing and modification ;}	{GO:0006270; DNA-dependent DNA replication initiation; biological_process GO:0016485; protein processing; biological_process GO:0006874; cellular calcium ion homeostasis; biological_process GO:0004519; endonuclease activity; molecular_function GO:0003676; nucleic acid binding; molecular_function GO:0005219; ryanodine-sensitive calcium-release channel activity; molecular_function GO:0004190; aspar…	{XM_010928651.2; PREDICTED: Elaeis guineensis DNA-damage-repair/toleration protein DRT111, chloroplastic (LOC105049095), mRNA}	{PF11744:Aluminium activated malate transporter PF06459:Ryanodine Receptor TM 4-6 PF09618:CRISPR-associated protein (Cas_Csy4) PF01080:Presenilin PF01585:G-patch domain PF02724:CDC45-like protein}	9a/b,10a/b
isocitric acid/citric acid(9a/b)	transcript_HQ_YNMLP_transcript12684/f3p0/2086	-0.894427	0.0405193	{XP_010261441.1; PREDICTED: probable sodium-coupled neutral amino acid transporter 6 [Nelumbo nucifera]}	{sp|Q28HE5|S38A6_XENTR; Probable sodium-coupled neutral amino acid transporter 6 OS=Xenopus tropicalis GN=slc38a6 PE=2 SV=1}	{nnu:104600274; K14207 SLC38A2, SNAT2 solute carrier family 38 (sodium-coupled neutral amino acid transporter), member 2 - ko04974; Organismal Systems; Digestive system; Protein digestion and absorption | ko04724; Organismal Systems; Nervous system; Glutamatergic synapse | ko04727; Organismal Systems; Nervous system; GABAergic synapse}	{At3g30390; KOG1305 Amino acid transporter protein E Amino acid transport and metabolism ;}	{GO:0003333; amino acid transmembrane transport; biological_process GO:0015643; toxin binding; molecular_function GO:0030153; bacteriocin immunity; biological_process}	{XM_007032866.2; PREDICTED: Theobroma cacao probable sodium-coupled neutral amino acid transporter 6 (LOC18601802), mRNA}	{PF03222:Tryptophan/tyrosine permease family PF03857:Colicin immunity protein}	9a/b,10a/b
isocitric acid/citric acid(9a/b)	transcript_HQ_YNMLP_transcript11440/f2p0/2266	-1	0	{XP_010241841.1; PREDICTED: zinc finger CCCH domain-containing protein 32-like [Nelumbo nucifera]}	{sp|Q6NPN3|C3H58_ARATH; Zinc finger CCCH domain-containing protein 58 OS=Arabidopsis thaliana GN=At5g18550 PE=2 SV=1}	{nnu:104586343; - - - - -}	{At5g18550; KOG1677 CCCH-type Zn-finger protein R General function prediction only ;}	{GO:0046872; metal ion binding; molecular_function}	{XM_010243539.2; PREDICTED: Nelumbo nucifera zinc finger CCCH domain-containing protein 32-like (LOC104586343), mRNA}	{PF00642:Zinc finger C-x8-C-x5-C-x3-H type (and similar)}	9a/b,10a/b
isocitric acid/citric acid(9a/b)	transcript_HQ_YNLB_transcript22011/f4p0/736	-0.894427	0.0405193	{XP_002282913.1; PREDICTED: zinc finger A20 and AN1 domain-containing stress-associated protein 4 [Vitis vinifera]}	{sp|Q9SJM6|SAP4_ARATH; Zinc finger A20 and AN1 domain-containing stress-associated protein 4 OS=Arabidopsis thaliana GN=SAP4 PE=1 SV=1}	{nnu:104588284; - - - - -}	{At2g36320; KOG3173 Predicted Zn-finger protein R General function prediction only ;}	{GO:0003677; DNA binding; molecular_function GO:0008270; zinc ion binding; molecular_function}	{NA}	{PF01754:A20-like zinc finger PF01428:AN1-like Zinc finger}	9a/b,10a/b
isocitric acid/citric acid(9a/b)	transcript_HQ_YNMLP_transcript855/f9p0/4177	-0.894427	0.0405193	{OAY22192.1; hypothetical protein MANES_S021600 [Manihot esculenta]}	{sp|Q9LHD1|AB15B_ARATH; ABC transporter B family member 15 OS=Arabidopsis thaliana GN=ABCB15 PE=3 SV=1}	{nnu:104596159; K05658 ABCB1, CD243 ATP-binding cassette, subfamily B (MDR/TAP), member 1 3.6.3.44 ko02010; Environmental Information Processing; Membrane transport; ABC transporters | ko04976; Organismal Systems; Digestive system; Bile secretion | ko05206; Human Diseases; Cancers: Overview; MicroRNAs in cancer}	{At3g28345; KOG0055 Multidrug/pheromone exporter, ABC superfamily Q Secondary metabolites biosynthesis, transport and catabolism ;}	{GO:0003924; GTPase activity; molecular_function GO:0031683; G-protein beta/gamma-subunit complex binding; molecular_function GO:0007186; G-protein coupled receptor protein signaling pathway; biological_process GO:0019001; guanyl nucleotide binding; molecular_function GO:0005524; ATP binding; molecular_function GO:0016301; kinase activity; molecular_function GO:0042626; ATPase activity, coupled t…	{XM_012227100.1; PREDICTED: Jatropha curcas ABC transporter B family member 15-like (LOC105642300), mRNA}	{PF00664:ABC transporter transmembrane region PF06414:Zeta toxin PF00503:G-protein alpha subunit PF03193:Protein of unknown function, DUF258 PF00004:ATPase family associated with various cellular activities (AAA) PF13304:AAA domain, putative AbiEii toxin, Type IV TA system PF00005:ABC transporter}	9a/b,10a/b
isocitric acid/citric acid(9a/b)	transcript_HQ_YNLB_transcript1835/f2p0/3505	-1	0	{XP_002515159.1; PREDICTED: aarF domain-containing protein kinase 4 [Ricinus communis]}	{sp|Q9SBB2|ABC1_ARATH; Protein ABC transporter 1, mitochondrial OS=Arabidopsis thaliana GN=ABC1 PE=2 SV=1}	{pop:POPTR_0002s18630g; K08869 ADCK, ABC1 aarF domain-containing kinase - -}	{At4g01660; KOG1234 ABC (ATP binding cassette) 1 protein R General function prediction only ;}	{NA}	{XM_008779194.2; PREDICTED: Phoenix dactylifera protein ABC transporter 1, mitochondrial (LOC103697353), mRNA}	{NA}	9a/b,10a/b
isocitric acid/citric acid(9a/b)	transcript_HQ_YNMLP_transcript8726/f2p0/2497	-0.894427	0.0405193	{XP_010261215.1; PREDICTED: sulfate transporter 1.3-like [Nelumbo nucifera]}	{sp|Q9FEP7|SUT13_ARATH; Sulfate transporter 1.3 OS=Arabidopsis thaliana GN=SULTR1;3 PE=2 SV=1}	{nnu:104600090; K17470 SULTR1 sulfate transporter 1, high-affinity - -}	{At1g78000; KOG0236 Sulfate/bicarbonate/oxalate exchanger SAT-1 and related transporters (SLC26 family) P Inorganic ion transport and metabolism ;}	{GO:0008272; sulfate transport; biological_process GO:0015116; sulfate transmembrane transporter activity; molecular_function GO:0016021; integral to membrane; cellular_component}	{XM_018973414.1; PREDICTED: Juglans regia sulfate transporter 1.3-like (LOC108997232), transcript variant X4, mRNA}	{PF00916:Sulfate permease family}	9a/b,10a/b
isocitric acid/citric acid(9a/b)	transcript_HQ_YNMLP_transcript15039/f2p0/1841	-0.894427	0.0405193	{XP_010270272.1; PREDICTED: amino acid permease 3 [Nelumbo nucifera]}	{sp|Q39134|AAP3_ARATH; Amino acid permease 3 OS=Arabidopsis thaliana GN=AAP3 PE=1 SV=2}	{bvg:104890562; - - - - -}	{At1g77380; KOG1303 Amino acid transporters E Amino acid transport and metabolism ;}	{GO:0003333; amino acid transmembrane transport; biological_process}	{XM_010676103.2; PREDICTED: Beta vulgaris subsp. vulgaris amino acid permease 4 (LOC104890562), mRNA}	{PF03222:Tryptophan/tyrosine permease family}	9a/b,10a/b
isocitric acid/citric acid(9a/b)	transcript_HQ_YNMLP_transcript24653/f3p0/720	-0.894427	0.0405193	{OAY61502.1; hypothetical protein MANES_01G194000 [Manihot esculenta]}	{sp|Q2V9B0|MY1R1_SOLTU; Transcription factor MYB1R1 OS=Solanum tuberosum PE=2 SV=1}	{nnu:104596258; - - - - -}	{NA}	{NA}	{XM_006363481.2; PREDICTED: Solanum tuberosum transcription factor MYB1R1 (LOC102595084), mRNA}	{NA}	9a/b,10a/b
isocitric acid/citric acid(9a/b)	transcript_HQ_YNLB_transcript2972/f2p0/3180	-0.894427	0.0405193	{XP_010252035.1; PREDICTED: uncharacterized protein LOC104593751 [Nelumbo nucifera]}	{sp|Q9FHK4|EDR4_ARATH; Protein ENHANCED DISEASE RESISTANCE 4 OS=Arabidopsis thaliana GN=EDR4 PE=1 SV=1}	{nnu:104593751; - - - - -}	{NA}	{NA}	{NA}	{NA}	9a/b,10a/b
isocitric acid/citric acid(9a/b)	transcript_HQ_YNMLP_transcript527/f3p0/4561	-0.9	0.0373861	{EOY10915.1; Transcription factor jumonji family protein / zinc finger family protein isoform 1 [Theobroma cacao]}	{sp|C0SUT9|JMJ16_ARATH; Putative lysine-specific demethylase JMJ16 OS=Arabidopsis thaliana GN=JMJ16 PE=2 SV=1}	{pper:PRUPE_ppa000401mg; K11446 KDM5, JARID1 histone demethylase JARID1 1.14.11.- -}	{At1g08620; KOG1246 DNA-binding protein jumonji/RBP2/SMCY, contains JmjC domain R General function prediction only ;}	{GO:0005634; nucleus; cellular_component}	{XM_016020084.1; PREDICTED: Ziziphus jujuba putative lysine-specific demethylase JMJ16 (LOC107412326), mRNA}	{PF05965:F/Y rich C-terminus PF05964:F/Y-rich N-terminus}	9a/b,10a/b
isocitric acid/citric acid(9a/b)	transcript_HQ_YNMLP_transcript17837/f3p0/1471	-0.894427	0.0405193	{XP_010271015.2; PREDICTED: 3'-N-debenzoyl-2'-deoxytaxol N-benzoyltransferase-like [Nelumbo nucifera]}	{sp|Q5JNT2|AT4_ORYSJ; Acyl transferase 4 OS=Oryza sativa subsp. japonica GN=AT4 PE=1 SV=1}	{egr:104434419; - - - - -}	{NA}	{GO:0016747; transferase activity, transferring acyl groups other than amino-acyl groups; molecular_function}	{NA}	{PF02458:Transferase family}	9a/b,10a/b
isocitric acid/citric acid(9a/b)	transcript_HQ_YNMLP_transcript12599/f2p0/2091	-0.894427	0.0405193	{KVI07236.1; protein of unknown function DUF250 [Cynara cardunculus var. scolymus]}	{NA}	{mdm:103448892; - - - - -}	{At4g09810; KOG1441 Glucose-6-phosphate/phosphate and phosphoenolpyruvate/phosphate antiporter GE Carbohydrate transport and metabolism ; Amino acid transport and metabolism ;}	{NA}	{NA}	{NA}	9a/b,10a/b
isocitric acid/citric acid(9a/b)	transcript_HQ_YNMLP_transcript18902/f13p0/1326	-0.894427	0.0405193	{KVH90320.1; Glycosyltransferase 39 like protein, partial [Cynara cardunculus var. scolymus]}	{sp|Q93ZE8|SDF2_ARATH; Stromal cell-derived factor 2-like protein OS=Arabidopsis thaliana GN=SDF2 PE=1 SV=1}	{gra:105773151; - - - - -}	{At2g25110; KOG3358 Uncharacterized secreted protein SDF2 (Stromal cell-derived factor 2), contains MIR domains R General function prediction only ;}	{GO:0016020; membrane; cellular_component}	{XM_018978141.1; PREDICTED: Juglans regia stromal cell-derived factor 2-like protein (LOC109001023), mRNA}	{PF02815:MIR domain}	9a/b,10a/b
isocitric acid/citric acid(9a/b)	transcript_HQ_YNMLP_transcript27820/f3p0/404	-0.894427	0.0405193	{XP_010032274.1; PREDICTED: caffeoylshikimate esterase [Eucalyptus grandis]}	{NA}	{vvi:100260284; K01054 MGLL acylglycerol lipase 3.1.1.23 ko00561; Metabolism; Lipid metabolism; Glycerolipid metabolism | ko04923; Organismal Systems; Endocrine system; Regulation of lipolysis in adipocytes | ko04723; Organismal Systems; Nervous system; Retrograde endocannabinoid signaling}	{NA}	{NA}	{NA}	{NA}	9a/b,10a/b
isocitric acid/citric acid(9a/b)	transcript_HQ_YNLB_transcript10477/f23p0/2078	-0.894427	0.0405193	{XP_010254811.1; PREDICTED: sugar transporter ERD6-like 6 isoform X1 [Nelumbo nucifera]}	{sp|Q93YP9|ERDL4_ARATH; Sugar transporter ERD6-like 4 OS=Arabidopsis thaliana GN=At1g19450 PE=2 SV=1}	{nnu:104595672; K08145 SLC2A8, GLUT8 MFS transporter, SP family, solute carrier family 2 (facilitated glucose transporter), member 8 - -}	{At1g19450; KOG0254 Predicted transporter (major facilitator superfamily) R General function prediction only ;}	{GO:0022857; transmembrane transporter activity; molecular_function GO:0016021; integral to membrane; cellular_component GO:0055085; transmembrane transport; biological_process}	{XM_016867579.1; PREDICTED: Gossypium hirsutum sugar transporter ERD6-like 6 (LOC107935043), transcript variant X2, mRNA}	{PF00083:Sugar (and other) transporter PF07690:Major Facilitator Superfamily}	9a/b,10a/b
isocitric acid/citric acid(9a/b)	transcript_HQ_SCEZ_transcript14030/f2p0/1729	-1	0	{KYP62166.1; Solute carrier family 35 member C2 [Cajanus cajan]}	{sp|Q9LRP2|PT317_ARATH; Probable sugar phosphate/phosphate translocator At3g17430 OS=Arabidopsis thaliana GN=At3g17430 PE=1 SV=1}	{csv:101213611; - - - - -}	{At3g17430; KOG1441 Glucose-6-phosphate/phosphate and phosphoenolpyruvate/phosphate antiporter GE Carbohydrate transport and metabolism ; Amino acid transport and metabolism ;}	{GO:0015159; polysaccharide transmembrane transporter activity; molecular_function GO:0015774; polysaccharide transport; biological_process GO:0016020; membrane; cellular_component}	{XM_010275490.2; PREDICTED: Nelumbo nucifera probable sugar phosphate/phosphate translocator At3g17430 (LOC104609238), mRNA}	{PF02563:Polysaccharide biosynthesis/export protein}	9a/b,10a/b
isocitric acid/citric acid(9a/b)	transcript_HQ_YNMLP_transcript20425/f3p0/1155	-0.894427	0.0405193	{XP_010261534.1; PREDICTED: abscisic acid receptor PYL8-like [Nelumbo nucifera]}	{sp|Q9FGM1|PYL8_ARATH; Abscisic acid receptor PYL8 OS=Arabidopsis thaliana GN=PYL8 PE=1 SV=1}	{sly:101251256; K14496 PYL abscisic acid receptor PYR/PYL family - ko04016; Environmental Information Processing; Signal transduction; MAPK signaling pathway - plant | ko04075; Environmental Information Processing; Signal transduction; Plant hormone signal transduction}	{NA}	{NA}	{XM_002318344.2; Populus trichocarpa hypothetical protein (POPTR_0012s01550g) mRNA, complete cds}	{NA}	9a/b,10a/b
isocitric acid/citric acid(9a/b)	transcript_HQ_YNMLP_transcript7793/f2p0/2597	-0.894427	0.0405193	{XP_010249147.1; PREDICTED: acyltransferase-like protein At1g54570, chloroplastic [Nelumbo nucifera]}	{sp|Q9LW26|Y3684_ARATH; Acyltransferase-like protein At3g26840, chloroplastic OS=Arabidopsis thaliana GN=At3g26840 PE=2 SV=1}	{nnu:104591807; - - - - -}	{NA}	{GO:0006508; proteolysis; biological_process GO:0009058; biosynthetic process; biological_process GO:0008152; NA GO:0016787; hydrolase activity; molecular_function GO:0008236; serine-type peptidase activity; molecular_function GO:0016788; hydrolase activity, acting on ester bonds; molecular_function}	{AC253884.1; Aquilegia coerulea clone COL06-M05, complete sequence}	{PF07859:alpha/beta hydrolase fold PF00326:Prolyl oligopeptidase family PF00975:Thioesterase domain}	9a/b,10a/b
isocitric acid/citric acid(9a/b)	transcript_HQ_YNMLP_transcript2366/f5p0/3497	-1	0	{XP_010267183.1; PREDICTED: homeobox-leucine zipper protein ATHB-15-like [Nelumbo nucifera]}	{sp|Q9ZU11|ATB15_ARATH; Homeobox-leucine zipper protein ATHB-15 OS=Arabidopsis thaliana GN=ATHB-15 PE=1 SV=1}	{jcu:105631553; K09338 HD-ZIP homeobox-leucine zipper protein - -}	{NA}	{GO:0008289; lipid binding; molecular_function GO:0043565; sequence-specific DNA binding; molecular_function GO:0003700; sequence-specific DNA binding transcription factor activity; molecular_function GO:0003677; DNA binding; molecular_function GO:0006355; regulation of transcription, DNA-dependent; biological_process GO:0003779; actin binding; molecular_function}	{XM_002283967.3; PREDICTED: Vitis vinifera homeobox-leucine zipper protein ATHB-15 (LOC100260057), mRNA}	{PF01852:START domain PF00046:Homeobox domain PF00170:bZIP transcription factor PF07765:KIP1-like protein}	9a/b,10a/b
isocitric acid/citric acid(9a/b)	transcript_HQ_YNMLP_transcript1382/f2p0/3842	-0.894427	0.0405193	{XP_015966063.1; PREDICTED: abietadienol/abietadienal oxidase [Arachis duranensis]}	{sp|Q50EK5|C72B2_PINTA; Cytochrome P450 720B2 OS=Pinus taeda GN=CYP720B2 PE=2 SV=1}	{lang:109357855; - - - - -; lang:109357855; - - - - -}	{At1g73340; KOG0157 Cytochrome P450 CYP4/CYP19/CYP26 subfamilies QI Secondary metabolites biosynthesis, transport and catabolism ; Lipid transport and metabolism ;}	{GO:0016705; oxidoreductase activity, acting on paired donors, with incorporation or reduction of molecular oxygen; molecular_function GO:0020037; heme binding; molecular_function GO:0055114; oxidation-reduction process; biological_process GO:0005506; iron ion binding; molecular_function}	{XM_002268121.4; PREDICTED: Vitis vinifera uncharacterized LOC100250766 (LOC100250766), transcript variant X2, mRNA}	{PF00067:Cytochrome P450}	9a/b,10a/b
isocitric acid/citric acid(9a/b)	transcript_HQ_SCEZ_transcript15836/f3p0/1592	-1	0	{XP_011038412.1; PREDICTED: isocitrate dehydrogenase [NADP]-like isoform X2 [Populus euphratica]}	{sp|Q40345|IDHP_MEDSA; Isocitrate dehydrogenase [NADP], chloroplastic (Fragment) OS=Medicago sativa PE=2 SV=1}	{pop:POPTR_0004s07320g; K00031 IDH1, IDH2, icd isocitrate dehydrogenase 1.1.1.42 ko01200; Metabolism; Global and overview maps; Carbon metabolism | ko01210; Metabolism; Global and overview maps; 2-Oxocarboxylic acid metabolism | ko01230; Metabolism; Global and overview maps; Biosynthesis of amino acids | ko00020; Metabolism; Carbohydrate metabolism; Citrate cycle (TCA cycle) | ko00720; Metabolism…	{At1g65930; KOG1526 NADP-dependent isocitrate dehydrogenase C Energy production and conversion ;}	{GO:0016616; oxidoreductase activity, acting on the CH-OH group of donors, NAD or NADP as acceptor; molecular_function GO:0055114; oxidation-reduction process; biological_process}	{XM_018955903.1; PREDICTED: Juglans regia isocitrate dehydrogenase [NADP]-like (LOC108984074), mRNA}	{PF00180:Isocitrate/isopropylmalate dehydrogenase}	9a/b,10a/b
[truncated: 48 more rows]
