# Supplementary material for: Dissection of full-length transcriptome and metabolome of Dichocarpum (Ranunculaceae): implications in evolution of specialized metabolism of Ranunculales medicinal plants
Source: PeerJ journal article supplement (doi:10.7717/peerj.12428), 2021-11-05
Supplement: TableS10,divergence_time.xlsx [file TableS10%2Cdivergence_time.xlsx]

## Sheet: Sheet1
Table S10 Ks values estimated with Ka/Ks Calculation tool (http://services.cbu.uib.no/tools/kaks) and divergence time estimates based on a synonymous substitution rate of 6.98 per billion years between the paralogous pairs of Ranunculales
Gene	Ks of Dichocarpum genes	Maximal Ks	T(yr)*=Ks/2r	Maximal T(yr)	r(synonymous substitution rate)
FNSI	0.2205		1.57951e+07		6.98×10-9
LDOX	0.1113	0.3985	7.97278e+06	2.85458e+07
F3H	0.1867		1.33739e+07
BUP	0.1213	0.4337	8.68911e+06	3.10673e+07
CNMT	0.0911		6.52579e+06
pavine NMT	0.1307		9.36246e+06
6OMT	0.2419		1.73281e+07
4'OMT	0.1775		1.27149e+07
alkaloid/flavonoid OMT	0.1589		1.13825e+07
SOMT	0.1225		8.77507e+06
CYP76A	0.1175	0.3251	8.41691e+06	2.3288e+07
CYP80,NMCH	0.1621		1.16117e+07
CYP80,CTS	0.1007		7.21347e+06
NCS paralog group I	0.1266	0.3783	9.06877e+06	2.70989e+07
NCS paralog group II	0.2752	0.3447	1.97135e+07	2.4692e+07
BBE like paralog group I	0.1505	0.4163	1.07808e+07	2.98209e+07
BBE like paralog group II	0.1043	0.1766	7.47135e+06	1.26504e+07
STOX	0.1495		1.07092e+07
SQE	0.61		4.36963e+07
anthocyanidin 3-O-glucosyltransferase(UGT71K)	0.1003	0.1332	7.18481e+06	9.54155e+06
UDP-rhamnose:rhamnosyltransferase(UGT91C)	0.1049	0.2812	7.51433e+06	2.01433e+07
anthocyanidin 3-O-glucoside 2‘’-O-glucosyltransferase(UGT79B3/30)	0.2602	0.2633	1.8639e+07	1.8861e+07
cyanidin 3-O-glucoside 7-O-glucosyltransferase	0.0912824	0.0967965	6.53885e+06	6.93385e+06
average	0.170238	0.295245	1.21947e+07	2.11494e+07
median	0.1307	0.3251	9.36246e+06	2.3288e+07
SD	0.110111	0.116471	7.88761e+06
Note:*, ancestral gene duplication is no later than this time.
